# Supplementary material for: Single-cell RNA sequencing unveils the hidden powers of zebrafish kidney for generating both hematopoiesis and adaptive antiviral immunity
Source: eLife. 2024 Mar 18;13:RP92424. doi: 10.7554/eLife.92424 (PMC10948150; doi:10.7554/eLife.92424)
Supplement: Supplementary file 2. [file elife-92424-supp2.xlsx]

## Sheet: Marker gene list
Supplementary file 2. Marker gene list of 13 immune-cell and renal cell categories
Target_Cluster	GeneID	GeneName	Target_Cluster_mean	Other_Cluster_mean	log2FC	Pvlaue	Qvalue	Description	GO	KEGG	KO_ENTRY	EC
0	ENSDARG00000075261	timp2b	75.9861	18.7862	2.01606	0	0	TIMP metallopeptidase inhibitor 2b [Source:ZFIN;Acc:ZDB-GENE-040426-2655]	GO:0002020(protease binding);GO:0005515(protein binding);GO:0005576(extracellular region);GO:0005615(extracellular space);GO:0008191(metalloendopeptidase inhibitor activity);GO:0009725(response to hormone);GO:0010033(response to organic substance);GO:0010951(negative regulation of endopeptidase activity);GO:0031012(extracellular matrix);GO:0034097(response to cytokine);GO:0051045(negative regulat…	NA	NA	NA
0	ENSDARG00000093124	scpp8	11.2017	2.9924	1.90434	0	0	secretory calcium-binding phosphoprotein 8 [Source:ZFIN;Acc:ZDB-GENE-090424-2]	NA	NA	NA	NA
0	ENSDARG00000114451	mmp13a.1	42.1862	11.5753	1.86572	0	0	matrix metallopeptidase 13a [Source:ZFIN;Acc:ZDB-GENE-031202-2]	GO:0004222(metalloendopeptidase activity);GO:0005615(extracellular space);GO:0006508(proteolysis);GO:0008233(peptidase activity);GO:0008237(metallopeptidase activity);GO:0008270(zinc ion binding);GO:0016787(hydrolase activity);GO:0030198(extracellular matrix organization);GO:0030574(collagen catabolic process);GO:0031012(extracellular matrix);GO:0046872(metal ion binding);GO:0048246(macrophage ch…	NA	NA	NA
0	ENSDARG00000097909	si:dkey-195m11.11	12.7115	3.70123	1.78006	0	0	si:dkey-195m11.11 [Source:ZFIN;Acc:ZDB-GENE-131127-648]	GO:0005044(scavenger receptor activity);GO:0006898(receptor-mediated endocytosis);GO:0016020(membrane);GO:0016021(integral component of membrane)	NA	NA	NA
0	ENSDARG00000042816	mmp9	18.0886	5.32536	1.76413	0	0	matrix metallopeptidase 9 [Source:ZFIN;Acc:ZDB-GENE-040426-2132]	GO:0001503(ossification);GO:0002633(positive regulation of granuloma formation);GO:0004222(metalloendopeptidase activity);GO:0005615(extracellular space);GO:0006508(proteolysis);GO:0008233(peptidase activity);GO:0008237(metallopeptidase activity);GO:0008270(zinc ion binding);GO:0009617(response to bacterium);GO:0016787(hydrolase activity);GO:0030198(extracellular matrix organization);GO:0030199(c…	NA	K01403	EC:3.4.24.35
0	ENSDARG00000101479	BX908782.2	94.0517	27.9327	1.7515	0	0	CD59 glycoprotein-like [Source:NCBI gene;Acc:103910140]	GO:0001971(negative regulation of activation of membrane attack complex)	NA	NA	NA
0	ENSDARG00000077975	si:ch73-343l4.8	8.83633	2.68886	1.71645	0	0	si:ch73-343l4.8 [Source:ZFIN;Acc:ZDB-GENE-090313-159]	GO:0016020(membrane);GO:0016021(integral component of membrane);GO:0030246(carbohydrate binding)	NA	NA	NA
0	ENSDARG00000052322	tlr5b	10.1981	3.11741	1.70989	0	0	toll-like receptor 5b [Source:ZFIN;Acc:ZDB-GENE-040219-15]	GO:0002253(activation of immune response);GO:0002376(immune system process);GO:0005515(protein binding);GO:0007165(signal transduction);GO:0016020(membrane);GO:0016021(integral component of membrane);GO:0035325(Toll-like receptor binding);GO:0045087(innate immune response);GO:0046982(protein heterodimerization activity)	04620(Toll-like receptor signaling pathway);05132(Salmonella infection)	K10168	NA
0	ENSDARG00000077308	gpr84	12.0038	3.74692	1.67971	0	0	G protein-coupled receptor 84 [Source:ZFIN;Acc:ZDB-GENE-070928-33]	GO:0001604(urotensin II receptor activity);GO:0004930(G protein-coupled receptor activity);GO:0005887(integral component of plasma membrane);GO:0007186(G protein-coupled receptor signaling pathway);GO:0007218(neuropeptide signaling pathway);GO:0008528(G protein-coupled peptide receptor activity);GO:0016020(membrane);GO:0016021(integral component of membrane);GO:0032496(response to lipopolysacchar…	NA	K08421	NA
0	ENSDARG00000098761	rgs2	19.5792	6.18547	1.66237	0	0	regulator of G protein signaling 2 [Source:ZFIN;Acc:ZDB-GENE-040718-410]	GO:0005096(GTPase activator activity);GO:0007186(G protein-coupled receptor signaling pathway);GO:0014032(neural crest cell development);GO:0043547(positive regulation of GTPase activity);GO:0090301(negative regulation of neural crest formation)	NA	K16449	NA
0	ENSDARG00000053836	si:ch211-284o19.8	13.5079	4.33894	1.63839	0	0	si:ch211-284o19.8 [Source:ZFIN;Acc:ZDB-GENE-070912-289]	GO:0016020(membrane);GO:0016021(integral component of membrane)	NA	NA	NA
0	ENSDARG00000098700	il1b	61.2753	19.8495	1.6262	0	0	interleukin 1, beta [Source:ZFIN;Acc:ZDB-GENE-040702-2]	GO:0002237(response to molecule of bacterial origin);GO:0005125(cytokine activity);GO:0005149(interleukin-1 receptor binding);GO:0005576(extracellular region);GO:0005615(extracellular space);GO:0006954(inflammatory response);GO:0006955(immune response);GO:0009615(response to virus);GO:0009617(response to bacterium);GO:0010469(regulation of signaling receptor activity);GO:0030593(neutrophil chemot…	04010(MAPK signaling pathway);04060(Cytokine-cytokine receptor interaction);04217(Necroptosis);04620(Toll-like receptor signaling pathway);04621(NOD-like receptor signaling pathway);04623(Cytosolic DNA-sensing pathway);04625(C-type lectin receptor signaling pathway);04933(AGE-RAGE signaling pathway in diabetic complications);05132(Salmonella infection);05168(Herpes simplex virus 1 infection)	K04519	NA
0	ENSDARG00000105530	si:dkey-19b23.14	9.65736	3.16268	1.61048	0	0	si:dkey-19b23.14 [Source:ZFIN;Acc:ZDB-GENE-160728-109]	GO:0016020(membrane);GO:0016021(integral component of membrane)	NA	NA	NA
0	ENSDARG00000078547	si:ch211-264f5.2	10.1037	3.32765	1.60231	0	0	si:ch211-264f5.2 [Source:ZFIN;Acc:ZDB-GENE-080303-2]	GO:0016020(membrane);GO:0016021(integral component of membrane)	NA	NA	NA
0	ENSDARG00000099839	si:ch211-9d9.1	9.60179	3.24374	1.56565	0	0	si:ch211-9d9.1 [Source:ZFIN;Acc:ZDB-GENE-030131-2657]	GO:0001971(negative regulation of activation of membrane attack complex);GO:0003676(nucleic acid binding);GO:0003677(DNA binding)	NA	NA	NA
0	ENSDARG00000078619	pnp5a	34.7583	11.7811	1.56088	0	0	purine nucleoside phosphorylase 5a [Source:ZFIN;Acc:ZDB-GENE-040426-2553]	GO:0003824(catalytic activity);GO:0004731(purine-nucleoside phosphorylase activity);GO:0005737(cytoplasm);GO:0006139(nucleobase-containing compound metabolic process);GO:0009116(nucleoside metabolic process);GO:0016740(transferase activity);GO:0016757(transferase activity, transferring glycosyl groups)	00230(Purine metabolism);00240(Pyrimidine metabolism);00760(Nicotinate and nicotinamide metabolism)	K03783	EC:2.4.2.1
0	ENSDARG00000001452	adam8a	12.91	4.46938	1.53034	0	0	ADAM metallopeptidase domain 8a [Source:ZFIN;Acc:ZDB-GENE-030616-622]	GO:0002020(protease binding);GO:0004222(metalloendopeptidase activity);GO:0006508(proteolysis);GO:0007229(integrin-mediated signaling pathway);GO:0008237(metallopeptidase activity);GO:0016020(membrane);GO:0016021(integral component of membrane)	NA	K06540	EC:3.4.24.-
0	ENSDARG00000033227	lect2l	227.597	79.7202	1.51346	0	0	leukocyte cell-derived chemotaxin 2 like [Source:ZFIN;Acc:ZDB-GENE-070127-4]	GO:0005737(cytoplasm);GO:0009617(response to bacterium);GO:0044782(cilium organization);GO:0046872(metal ion binding);GO:0060271(cilium assembly)	NA	NA	NA
0	ENSDARG00000033735	ncf1	67.4063	23.8428	1.49933	0	0	neutrophil cytosolic factor 1 [Source:ZFIN;Acc:ZDB-GENE-031006-6]	GO:0005515(protein binding);GO:0005737(cytoplasm);GO:0006801(superoxide metabolic process);GO:0016175(superoxide-generating NADPH oxidase activity);GO:0016176(superoxide-generating NADPH oxidase activator activity);GO:0035091(phosphatidylinositol binding);GO:0043085(positive regulation of catalytic activity);GO:0045730(respiratory burst);GO:0050832(defense response to fungus);GO:0055114(oxidation…	04145(Phagosome)	K08011	NA
0	ENSDARG00000068784	vsir	13.4739	4.85976	1.47121	0	0	V-set immunoregulatory receptor [Source:ZFIN;Acc:ZDB-GENE-060929-716]	GO:0003674(molecular_function);GO:0016020(membrane);GO:0016021(integral component of membrane)	04514(Cell adhesion molecules (CAMs))	K23268	NA
0	ENSDARG00000043457	gapdh	8.32639	3.04734	1.45014	0	0	glyceraldehyde-3-phosphate dehydrogenase [Source:ZFIN;Acc:ZDB-GENE-030115-1]	GO:0000166(nucleotide binding);GO:0000226(microtubule cytoskeleton organization);GO:0004365(glyceraldehyde-3-phosphate dehydrogenase (NAD+) (phosphorylating) activity);GO:0005634(nucleus);GO:0005737(cytoplasm);GO:0005829(cytosol);GO:0005856(cytoskeleton);GO:0006006(glucose metabolic process);GO:0006096(glycolytic process);GO:0006915(apoptotic process);GO:0008017(microtubule binding);GO:0015630(mi…	00010(Glycolysis / Gluconeogenesis)	K00134	EC:1.2.1.12
0	ENSDARG00000015551	fth1a	50.0439	18.3341	1.44866	0	0	ferritin, heavy polypeptide 1a [Source:ZFIN;Acc:ZDB-GENE-000831-2]	GO:0004322(ferroxidase activity);GO:0005506(iron ion binding);GO:0005737(cytoplasm);GO:0006826(iron ion transport);GO:0006879(cellular iron ion homeostasis);GO:0006880(intracellular sequestering of iron ion);GO:0008198(ferrous iron binding);GO:0008199(ferric iron binding);GO:0042802(identical protein binding);GO:0046872(metal ion binding);GO:0055114(oxidation-reduction process)	04216(Ferroptosis);04217(Necroptosis)	K00522	EC:1.16.3.2
0	ENSDARG00000054755	alox5ap	12.7938	4.7312	1.43516	0	0	arachidonate 5-lipoxygenase-activating protein [Source:ZFIN;Acc:ZDB-GENE-030131-9322]	GO:0001525(angiogenesis);GO:0004364(glutathione transferase activity);GO:0004464(leukotriene-C4 synthase activity);GO:0004602(glutathione peroxidase activity);GO:0005635(nuclear envelope);GO:0005783(endoplasmic reticulum);GO:0006691(leukotriene metabolic process);GO:0008047(enzyme activator activity);GO:0016021(integral component of membrane);GO:0019370(leukotriene biosynthetic process);GO:004308…	NA	NA	NA
0	ENSDARG00000012972	cfl1l	8.29273	3.10163	1.41882	0	0	cofilin 1 (non-muscle), like [Source:ZFIN;Acc:ZDB-GENE-040426-2770]	GO:0003779(actin binding);GO:0005622(intracellular);GO:0015629(actin cytoskeleton);GO:0030042(actin filament depolymerization)	04810(Regulation of actin cytoskeleton)	K05765	NA
0	ENSDARG00000074851	s1pr4	5.75499	2.15601	1.41645	0	0	sphingosine-1-phosphate receptor 4 [Source:ZFIN;Acc:ZDB-GENE-050506-8]	GO:0003376(sphingosine-1-phosphate receptor signaling pathway);GO:0004930(G protein-coupled receptor activity);GO:0007165(signal transduction);GO:0007186(G protein-coupled receptor signaling pathway);GO:0016020(membrane);GO:0016021(integral component of membrane);GO:0030593(neutrophil chemotaxis);GO:0038036(sphingosine-1-phosphate receptor activity)	04068(FoxO signaling pathway);04080(Neuroactive ligand-receptor interaction)	K04293	NA
0	ENSDARG00000094485	si:dkey-27h10.2	7.16263	2.69471	1.41036	0	0	si:dkey-27h10.2 [Source:ZFIN;Acc:ZDB-GENE-090313-296]	GO:0016020(membrane);GO:0016021(integral component of membrane)	NA	NA	NA
0	ENSDARG00000093193	chia.6.1	5.15958	1.94764	1.40553	0	0	chitinase, acidic.6 [Source:ZFIN;Acc:ZDB-GENE-030131-1140]	GO:0004553(hydrolase activity, hydrolyzing O-glycosyl compounds);GO:0004568(chitinase activity);GO:0005576(extracellular region);GO:0005737(cytoplasm);GO:0005975(carbohydrate metabolic process);GO:0006030(chitin metabolic process);GO:0006032(chitin catabolic process);GO:0008061(chitin binding)	00520(Amino sugar and nucleotide sugar metabolism)	K01183	EC:3.2.1.14
0	ENSDARG00000008075	illr4	7.03986	2.6926	1.38655	0	0	immune-related, lectin-like receptor 4 [Source:ZFIN;Acc:ZDB-GENE-050311-5]	GO:0016020(membrane);GO:0016021(integral component of membrane);GO:0030246(carbohydrate binding)	NA	K10064	NA
0	ENSDARG00000099430	atg16l1	6.33146	2.42317	1.38564	0	0	ATG16 autophagy related 16-like 1 (S. cerevisiae) [Source:ZFIN;Acc:ZDB-GENE-050417-401]	GO:0000045(autophagosome assembly);GO:0000421(autophagosome membrane);GO:0003674(molecular_function);GO:0005515(protein binding);GO:0039689(negative stranded viral RNA replication)	04136(Autophagy - other);04140(Autophagy - animal);04621(NOD-like receptor signaling pathway)	K17890	NA
0	ENSDARG00000099411	zgc:158343	23.7554	9.24569	1.3614	0	0	zgc:158343 [Source:ZFIN;Acc:ZDB-GENE-061201-9]	GO:0003674(molecular_function);GO:0043066(negative regulation of apoptotic process)	NA	NA	NA
0	ENSDARG00000104474	il6r	7.24487	2.82275	1.35986	0	0	interleukin 6 receptor [Source:ZFIN;Acc:ZDB-GENE-080107-7]	GO:0004896(cytokine receptor activity);GO:0005515(protein binding);GO:0009897(external side of plasma membrane);GO:0016020(membrane);GO:0016021(integral component of membrane);GO:0019221(cytokine-mediated signaling pathway);GO:0019955(cytokine binding);GO:0043235(receptor complex)	04060(Cytokine-cytokine receptor interaction)	K05055	NA
0	ENSDARG00000052088	cxcr1	4.24105	1.6541	1.35838	0	0	chemokine (C-X-C motif) receptor 1 [Source:ZFIN;Acc:ZDB-GENE-070302-4]	GO:0004930(G protein-coupled receptor activity);GO:0006935(chemotaxis);GO:0006955(immune response);GO:0007165(signal transduction);GO:0007186(G protein-coupled receptor signaling pathway);GO:0007204(positive regulation of cytosolic calcium ion concentration);GO:0009897(external side of plasma membrane);GO:0016020(membrane);GO:0016021(integral component of membrane);GO:0016493(C-C chemokine recept…	NA	NA	NA
0	ENSDARG00000104077	fcer1gl	17.9232	7.09164	1.33764	0	0	Fc receptor, IgE, high affinity I, gamma polypeptide like [Source:ZFIN;Acc:ZDB-GENE-070502-4]	GO:0016020(membrane);GO:0016021(integral component of membrane)	NA	NA	NA
0	ENSDARG00000056783	raraa	6.02488	2.38883	1.33463	0	0	retinoic acid receptor, alpha a [Source:ZFIN;Acc:ZDB-GENE-980526-284]	GO:0000122(negative regulation of transcription by RNA polymerase II);GO:0000976(transcription regulatory region sequence-specific DNA binding);GO:0000977(RNA polymerase II regulatory region sequence-specific DNA binding);GO:0000981(DNA-binding transcription factor activity, RNA polymerase II-specific);GO:0001889(liver development);GO:0003677(DNA binding);GO:0003700(DNA-binding transcription fact…	NA	K08527	NA
0	ENSDARG00000007377	odc1	12.0503	4.81949	1.32211	0	0	ornithine decarboxylase 1 [Source:ZFIN;Acc:ZDB-GENE-010816-1]	GO:0003824(catalytic activity);GO:0004586(ornithine decarboxylase activity);GO:0005737(cytoplasm);GO:0006596(polyamine biosynthetic process);GO:0033387(putrescine biosynthetic process from ornithine);GO:0042462(eye photoreceptor cell development)	00330(Arginine and proline metabolism);00480(Glutathione metabolism)	K01581	EC:4.1.1.17
0	ENSDARG00000091996	tcnbb	4.16701	1.6708	1.31847	0	0	transcobalamin beta b [Source:ZFIN;Acc:ZDB-GENE-030131-12]	GO:0071466(cellular response to xenobiotic stimulus)	NA	NA	NA
0	ENSDARG00000099693	AL935065.1	4.57406	1.8414	1.31267	0	0	uncharacterized LOC567472 [Source:NCBI gene;Acc:567472]	GO:0005125(cytokine activity);GO:0005576(extracellular region);GO:0007166(cell surface receptor signaling pathway);GO:0010469(regulation of signaling receptor activity);GO:0016020(membrane);GO:0016021(integral component of membrane)	NA	NA	NA
0	ENSDARG00000005481	nfkbiaa	73.9543	29.8184	1.31043	0	0	nuclear factor of kappa light polypeptide gene enhancer in B-cells inhibitor, alpha a [Source:ZFIN;Acc:ZDB-GENE-040426-2227]	GO:0005515(protein binding);GO:0009615(response to virus);GO:1901532(regulation of hematopoietic progenitor cell differentiation);GO:1901533(negative regulation of hematopoietic progenitor cell differentiation)	04210(Apoptosis);04620(Toll-like receptor signaling pathway);04621(NOD-like receptor signaling pathway);04622(RIG-I-like receptor signaling pathway);04623(Cytosolic DNA-sensing pathway);04625(C-type lectin receptor signaling pathway);04920(Adipocytokine signaling pathway);05168(Herpes simplex virus 1 infection)	K04734	NA
0	ENSDARG00000010423	npsn	76.4454	31.1532	1.29505	0	0	nephrosin [Source:ZFIN;Acc:ZDB-GENE-040420-2]	GO:0004222(metalloendopeptidase activity);GO:0005575(cellular_component);GO:0006508(proteolysis);GO:0008233(peptidase activity);GO:0008237(metallopeptidase activity);GO:0008270(zinc ion binding);GO:0016787(hydrolase activity);GO:0046872(metal ion binding)	NA	NA	NA
0	ENSDARG00000037870	actb2	335.872	140.016	1.26232	0	0	actin, beta 2 [Source:ZFIN;Acc:ZDB-GENE-000329-3]	GO:0000166(nucleotide binding);GO:0005524(ATP binding);GO:0005634(nucleus);GO:0005737(cytoplasm);GO:0005856(cytoskeleton);GO:0005886(plasma membrane);GO:0005925(focal adhesion);GO:0097433(dense body)	04145(Phagosome);04210(Apoptosis);04510(Focal adhesion);04520(Adherens junction);04530(Tight junction);04810(Regulation of actin cytoskeleton);05132(Salmonella infection)	K05692	NA
0	ENSDARG00000021339	cpa5	19.1817	8.21545	1.22332	0	0	carboxypeptidase A5 [Source:ZFIN;Acc:ZDB-GENE-020514-1]	GO:0004180(carboxypeptidase activity);GO:0004181(metallocarboxypeptidase activity);GO:0005615(extracellular space);GO:0006508(proteolysis);GO:0008270(zinc ion binding)	NA	K08779	EC:3.4.17.1
0	ENSDARG00000036967	smox	6.32239	2.72935	1.21191	0	0	spermine oxidase [Source:ZFIN;Acc:ZDB-GENE-031201-3]	GO:0016491(oxidoreductase activity);GO:0030097(hemopoiesis);GO:0046208(spermine catabolic process);GO:0046592(polyamine oxidase activity);GO:0055114(oxidation-reduction process)	00330(Arginine and proline metabolism);00410(beta-Alanine metabolism)	K12259	1.5.3.-;EC:1.5.3.16
0	ENSDARG00000043182	hhla2a.1	4.86133	2.10955	1.20442	0	0	HERV-H LTR-associating 2a, tandem duplicate 1 [Source:ZFIN;Acc:ZDB-GENE-050327-45]	GO:0003674(molecular_function);GO:0006955(immune response);GO:0007165(signal transduction);GO:0007166(cell surface receptor signaling pathway);GO:0009897(external side of plasma membrane);GO:0009986(cell surface);GO:0016020(membrane);GO:0016021(integral component of membrane);GO:0031295(T cell costimulation);GO:0042102(positive regulation of T cell proliferation);GO:0042130(negative regulation of…	NA	NA	NA
0	ENSDARG00000114387	CU499336.2	7.87702	3.41909	1.20404	0	0	NA	NA	NA	NA	NA
0	ENSDARG00000036382	ponzr6	5.6507	2.45355	1.20356	0	0	plac8 onzin related protein 6 [Source:ZFIN;Acc:ZDB-GENE-081104-326]	NA	NA	NA	NA
0	ENSDARG00000007682	ppdpfa	4.89445	2.12946	1.20066	0	0	pancreatic progenitor cell differentiation and proliferation factor a [Source:ZFIN;Acc:ZDB-GENE-030219-204]	GO:0001708(cell fate specification);GO:0007275(multicellular organism development);GO:0008283(cell population proliferation);GO:0030154(cell differentiation);GO:0031017(exocrine pancreas development)	NA	NA	NA
0	ENSDARG00000007823	atf3	17.6089	7.68709	1.19579	0	0	activating transcription factor 3 [Source:ZFIN;Acc:ZDB-GENE-040426-728]	GO:0000978(RNA polymerase II proximal promoter sequence-specific DNA binding);GO:0003677(DNA binding);GO:0003700(DNA-binding transcription factor activity);GO:0005634(nucleus);GO:0006355(regulation of transcription, DNA-templated);GO:0006357(regulation of transcription by RNA polymerase II);GO:0009615(response to virus)	NA	K09032	NA
0	ENSDARG00000007693	nfkbiab	45.4602	20.059	1.18035	0	0	nuclear factor of kappa light polypeptide gene enhancer in B-cells inhibitor, alpha b [Source:ZFIN;Acc:ZDB-GENE-030131-1819]	GO:0005515(protein binding)	04210(Apoptosis);04620(Toll-like receptor signaling pathway);04621(NOD-like receptor signaling pathway);04622(RIG-I-like receptor signaling pathway);04623(Cytosolic DNA-sensing pathway);04625(C-type lectin receptor signaling pathway);04920(Adipocytokine signaling pathway);05168(Herpes simplex virus 1 infection)	K04734	NA
0	ENSDARG00000054543	samsn1a	8.95554	4.02052	1.1554	0	0	SAM domain, SH3 domain and nuclear localisation signals 1a [Source:ZFIN;Acc:ZDB-GENE-030131-8639]	GO:0005515(protein binding)	NA	NA	NA
0	ENSDARG00000063295	myh9a	8.96345	4.02535	1.15494	0	0	myosin, heavy chain 9a, non-muscle [Source:ZFIN;Acc:ZDB-GENE-030131-5870]	GO:0000166(nucleotide binding);GO:0003094(glomerular filtration);GO:0003774(motor activity);GO:0003779(actin binding);GO:0005515(protein binding);GO:0005524(ATP binding);GO:0016459(myosin complex);GO:0032835(glomerulus development);GO:0032836(glomerular basement membrane development);GO:0051015(actin filament binding);GO:0072015(glomerular visceral epithelial cell development);GO:0072104(glomerul…	04530(Tight junction)	K10352	NA
0	ENSDARG00000053542	kctd12.2	5.14179	2.31105	1.15372	0	0	potassium channel tetramerisation domain containing 12.2 [Source:ZFIN;Acc:ZDB-GENE-060117-4]	GO:0005515(protein binding);GO:0021986(habenula development);GO:0048814(regulation of dendrite morphogenesis);GO:0051260(protein homooligomerization)	NA	K21918	NA
0	ENSDARG00000058348	scinlb	7.1281	3.21473	1.14882	0	0	scinderin like b [Source:ZFIN;Acc:ZDB-GENE-040426-2068]	GO:0005575(cellular_component);GO:0008150(biological_process);GO:0051015(actin filament binding)	04810(Regulation of actin cytoskeleton)	K05768	NA
0	ENSDARG00000104181	tmsb1	14.168	6.4009	1.14629	0	0	thymosin beta 1 [Source:ZFIN;Acc:ZDB-GENE-030131-8575]	GO:0003779(actin binding);GO:0003785(actin monomer binding);GO:0005737(cytoplasm);GO:0005856(cytoskeleton);GO:0007015(actin filament organization);GO:0030334(regulation of cell migration);GO:0042989(sequestering of actin monomers)	NA	NA	NA
0	ENSDARG00000020645	slc7a3a	5.80558	2.62404	1.14565	0	0	solute carrier family 7 (cationic amino acid transporter, y+ system), member 3a [Source:ZFIN;Acc:ZDB-GENE-041114-206]	GO:0000064(L-ornithine transmembrane transporter activity);GO:0006631(fatty acid metabolic process);GO:0006641(triglyceride metabolic process);GO:0006865(amino acid transport);GO:0015181(arginine transmembrane transporter activity);GO:0015189(L-lysine transmembrane transporter activity);GO:0016020(membrane);GO:0016021(integral component of membrane);GO:0022857(transmembrane transporter activity);…	NA	K13865	NA
0	ENSDARG00000037861	slc2a3b	6.09233	2.77025	1.13698	0	0	solute carrier family 2 (facilitated glucose transporter), member 3b [Source:ZFIN;Acc:ZDB-GENE-121031-5]	GO:0005215(transporter activity);GO:0016020(membrane);GO:0016021(integral component of membrane);GO:0022857(transmembrane transporter activity);GO:0055085(transmembrane transport)	NA	NA	NA
0	ENSDARG00000032631	ltb4r	4.30177	1.96537	1.13012	0	0	leukotriene B4 receptor [Source:ZFIN;Acc:ZDB-GENE-070705-164]	GO:0001632(leukotriene B4 receptor activity);GO:0004930(G protein-coupled receptor activity);GO:0004966(galanin receptor activity);GO:0004974(leukotriene receptor activity);GO:0005887(integral component of plasma membrane);GO:0007165(signal transduction);GO:0007186(G protein-coupled receptor signaling pathway);GO:0007218(neuropeptide signaling pathway);GO:0008528(G protein-coupled peptide recepto…	04080(Neuroactive ligand-receptor interaction)	K04296	NA
0	ENSDARG00000071384	slc7a11	5.70996	2.61799	1.12502	0	0	solute carrier family 7 (anionic amino acid transporter light chain, xc- system), member 11 [Source:ZFIN;Acc:ZDB-GENE-150416-1]	GO:0015179(L-amino acid transmembrane transporter activity);GO:0016020(membrane);GO:0016021(integral component of membrane);GO:0022857(transmembrane transporter activity);GO:0055085(transmembrane transport);GO:1902475(L-alpha-amino acid transmembrane transport)	04216(Ferroptosis)	K13869	NA
0	ENSDARG00000094396	CR848841.1	3.39628	1.56005	1.12236	0	0	NA	NA	NA	NA	NA
0	ENSDARG00000095556	CR318588.4	377.804	174.232	1.11663	0	0	uncharacterized LOC795545 [Source:NCBI gene;Acc:795545]	NA	NA	NA	NA
0	ENSDARG00000004301	rhogb	8.83942	4.08324	1.11424	0	0	ras homolog family member Gb [Source:ZFIN;Acc:ZDB-GENE-030131-8877]	GO:0000166(nucleotide binding);GO:0003924(GTPase activity);GO:0005525(GTP binding);GO:0005622(intracellular);GO:0005737(cytoplasm);GO:0005886(plasma membrane);GO:0005938(cell cortex);GO:0007015(actin filament organization);GO:0007163(establishment or maintenance of cell polarity);GO:0007264(small GTPase mediated signal transduction);GO:0007266(Rho protein signal transduction);GO:0008360(regulatio…	05132(Salmonella infection)	K07863	NA
0	ENSDARG00000111188	cdaa	6.04611	2.80207	1.10952	0	0	cytidine deaminase a [Source:ZFIN;Acc:ZDB-GENE-170609-2]	GO:0003824(catalytic activity);GO:0004126(cytidine deaminase activity);GO:0008270(zinc ion binding);GO:0009972(cytidine deamination);GO:0016787(hydrolase activity);GO:0046872(metal ion binding)	00240(Pyrimidine metabolism);00983(Drug metabolism - other enzymes)	K01489	EC:3.5.4.5
0	ENSDARG00000044852	wbp2nl	10.1281	4.70464	1.10621	0	0	WBP2 N-terminal like [Source:ZFIN;Acc:ZDB-GENE-030131-4012]	GO:0003713(transcription coactivator activity);GO:0005634(nucleus);GO:0007343(egg activation);GO:0031490(chromatin DNA binding);GO:0033011(perinuclear theca);GO:0035038(female pronucleus assembly);GO:0035039(male pronucleus assembly);GO:0050699(WW domain binding);GO:1903508(positive regulation of nucleic acid-templated transcription)	NA	K22532	NA
0	ENSDARG00000086337	si:dkey-102g19.3	7.79878	3.6247	1.10539	0	0	si:dkey-102g19.3 [Source:ZFIN;Acc:ZDB-GENE-091204-230]	NA	NA	NA	NA
0	ENSDARG00000077069	srgn	78.3952	36.4565	1.10459	0	0	serglycin [Source:ZFIN;Acc:ZDB-GENE-030131-7127]	NA	NA	K06849	NA
0	ENSDARG00000113899	zgc:77650	7.88481	3.6751	1.10129	0	0	zgc:77650 [Source:ZFIN;Acc:ZDB-GENE-030131-6151]	GO:0000166(nucleotide binding);GO:0005525(GTP binding);GO:0005737(cytoplasm);GO:0005794(Golgi apparatus);GO:0005886(plasma membrane);GO:0006886(intracellular protein transport);GO:0006890(retrograde vesicle-mediated transport, Golgi to endoplasmic reticulum);GO:0006893(Golgi to plasma membrane transport);GO:0016192(vesicle-mediated transport)	NA	K07939	NA
0	ENSDARG00000035136	selenow1	24.2348	11.3784	1.09079	0	0	selenoprotein W, 1 [Source:ZFIN;Acc:ZDB-GENE-030410-5]	NA	NA	NA	NA
0	ENSDARG00000102762	pik3r5	4.43497	2.08752	1.08713	0	0	phosphoinositide-3-kinase, regulatory subunit 5 [Source:ZFIN;Acc:ZDB-GENE-030131-2308]	GO:0005942(phosphatidylinositol 3-kinase complex);GO:0005944(phosphatidylinositol 3-kinase complex, class IB);GO:0007186(G protein-coupled receptor signaling pathway);GO:0014065(phosphatidylinositol 3-kinase signaling);GO:0043406(positive regulation of MAP kinase activity);GO:0043551(regulation of phosphatidylinositol 3-kinase activity);GO:0046935(1-phosphatidylinositol-3-kinase regulator activit…	04261(Adrenergic signaling in cardiomyocytes);04371(Apelin signaling pathway)	K21290	NA
0	ENSDARG00000035326	nccrp1	13.2287	6.22884	1.08663	0	0	non-specific cytotoxic cell receptor protein 1 [Source:ZFIN;Acc:ZDB-GENE-000210-13]	GO:0005737(cytoplasm)	NA	NA	NA
0	ENSDARG00000009978	icn	35.5137	16.7867	1.08106	0	0	ictacalcin [Source:ZFIN;Acc:ZDB-GENE-030131-8599]	GO:0005509(calcium ion binding);GO:0046872(metal ion binding);GO:0046914(transition metal ion binding)	NA	NA	NA
0	ENSDARG00000057789	lyz	571.895	270.499	1.08013	0	0	lysozyme [Source:ZFIN;Acc:ZDB-GENE-020515-2]	GO:0003796(lysozyme activity)	NA	K01185	EC:3.2.1.17
0	ENSDARG00000099385	CT030188.1	7.07997	3.35259	1.07847	0	0	si: ch211-223l2.4 [Source:NCBI gene;Acc:100002400]	GO:0003779(actin binding);GO:0005516(calmodulin binding);GO:0006936(muscle contraction);GO:0007165(signal transduction);GO:0017022(myosin binding)	NA	NA	NA
0	ENSDARG00000035018	thy1	4.62816	2.20816	1.06759	0	0	Thy-1 cell surface antigen [Source:ZFIN;Acc:ZDB-GENE-030131-8561]	GO:0005178(integrin binding);GO:0007155(cell adhesion);GO:0030334(regulation of cell migration)	NA	K06514	NA
0	ENSDARG00000019521	mpx	17.8255	8.54826	1.06024	0	0	myeloid-specific peroxidase [Source:ZFIN;Acc:ZDB-GENE-030131-9460]	GO:0004601(peroxidase activity);GO:0005515(protein binding);GO:0005615(extracellular space);GO:0005737(cytoplasm);GO:0006952(defense response);GO:0006954(inflammatory response);GO:0006979(response to oxidative stress);GO:0009617(response to bacterium);GO:0010310(regulation of hydrogen peroxide metabolic process);GO:0020037(heme binding);GO:0055114(oxidation-reduction process);GO:0098869(cellular …	NA	NA	NA
0	ENSDARG00000099672	capgb	7.11095	3.42728	1.05298	0	0	capping protein (actin filament), gelsolin-like b [Source:ZFIN;Acc:ZDB-GENE-030131-8541]	GO:0005575(cellular_component);GO:0051015(actin filament binding);GO:0051016(barbed-end actin filament capping)	NA	K10368	NA
0	ENSDARG00000104118	antxr2a	5.96323	2.88625	1.04689	0	0	ANTXR cell adhesion molecule 2a [Source:ZFIN;Acc:ZDB-GENE-060526-14]	GO:0000132(establishment of mitotic spindle orientation);GO:0003779(actin binding);GO:0004888(transmembrane signaling receptor activity);GO:0005768(endosome);GO:0005886(plasma membrane);GO:0009986(cell surface);GO:0016020(membrane);GO:0016021(integral component of membrane);GO:0017048(Rho GTPase binding);GO:0030496(midbody);GO:0030864(cortical actin cytoskeleton);GO:0032154(cleavage furrow);GO:00…	04621(NOD-like receptor signaling pathway)	K20909	NA
0	ENSDARG00000017602	ccng2	13.4668	6.54202	1.0416	0	0	cyclin G2 [Source:ZFIN;Acc:ZDB-GENE-021016-1]	GO:0000079(regulation of cyclin-dependent protein serine/threonine kinase activity);GO:0000278(mitotic cell cycle);GO:0000307(cyclin-dependent protein kinase holoenzyme complex);GO:0004672(protein kinase activity);GO:0005634(nucleus);GO:0005737(cytoplasm);GO:0006468(protein phosphorylation);GO:0007088(regulation of mitotic nuclear division);GO:0008284(positive regulation of cell population prolif…	04068(FoxO signaling pathway);04115(p53 signaling pathway)	K10146	NA
0	ENSDARG00000102221	HACD4	3.48761	1.70561	1.03195	0	0	si:ch73-41h24.1 [Source:ZFIN;Acc:ZDB-GENE-030131-3627]	GO:0005783(endoplasmic reticulum);GO:0005789(endoplasmic reticulum membrane);GO:0006629(lipid metabolic process);GO:0006631(fatty acid metabolic process);GO:0006633(fatty acid biosynthetic process);GO:0016020(membrane);GO:0016021(integral component of membrane);GO:0016829(lyase activity);GO:0018812(3-hydroxyacyl-CoA dehydratase activity);GO:0030148(sphingolipid biosynthetic process);GO:0030497(fa…	00062(Fatty acid elongation);01040(Biosynthesis of unsaturated fatty acids)	K10703	EC:4.2.1.134
0	ENSDARG00000023303	zgc:66427	5.66681	2.77777	1.02861	0	0	zgc:66427 [Source:ZFIN;Acc:ZDB-GENE-040426-1913]	NA	NA	K10694	EC:2.3.2.27
0	ENSDARG00000037891	mlx	3.70899	1.81931	1.02764	0	0	MLX, MAX dimerization protein [Source:ZFIN;Acc:ZDB-GENE-050522-316]	GO:0003700(DNA-binding transcription factor activity);GO:0005634(nucleus);GO:0006355(regulation of transcription, DNA-templated);GO:0006357(regulation of transcription by RNA polymerase II);GO:0008134(transcription factor binding);GO:0046983(protein dimerization activity)	NA	K09113	NA
0	ENSDARG00000043102	lxn	6.50253	3.20702	1.01977	0	0	latexin [Source:ZFIN;Acc:ZDB-GENE-041212-18]	GO:0003674(molecular_function);GO:0005575(cellular_component);GO:0008150(biological_process)	NA	NA	NA
0	ENSDARG00000063195	pxk	5.90676	2.91381	1.01946	0	0	PX domain containing serine/threonine kinase [Source:ZFIN;Acc:ZDB-GENE-050208-393]	GO:0003779(actin binding);GO:0004672(protein kinase activity);GO:0005524(ATP binding);GO:0005737(cytoplasm);GO:0005886(plasma membrane);GO:0006468(protein phosphorylation);GO:0032780(negative regulation of ATPase activity);GO:0035091(phosphatidylinositol binding);GO:0042391(regulation of membrane potential);GO:0043271(negative regulation of ion transport)	NA	K17543	NA
0	ENSDARG00000101385	f8	2.78495	1.37502	1.0182	0	0	coagulation factor VIII, procoagulant component [Source:ZFIN;Acc:ZDB-GENE-090629-2]	GO:0005507(copper ion binding);GO:0007596(blood coagulation);GO:0016491(oxidoreductase activity);GO:0030168(platelet activation);GO:0046872(metal ion binding);GO:0055114(oxidation-reduction process)	NA	NA	NA
0	ENSDARG00000013598	tnfb	12.0537	6.01153	1.00367	0	0	tumor necrosis factor b (TNF superfamily, member 2) [Source:ZFIN;Acc:ZDB-GENE-050601-2]	GO:0001889(liver development);GO:0005125(cytokine activity);GO:0005164(tumor necrosis factor receptor binding);GO:0005515(protein binding);GO:0005615(extracellular space);GO:0006955(immune response);GO:0010469(regulation of signaling receptor activity);GO:0016020(membrane);GO:0016021(integral component of membrane)	04060(Cytokine-cytokine receptor interaction);05168(Herpes simplex virus 1 infection)	K05468	NA
0	ENSDARG00000075870	triobpa	2.67587	1.33509	1.00307	0	0	TRIO and F-actin binding protein a [Source:ZFIN;Acc:ZDB-GENE-110411-40]	GO:0032956(regulation of actin cytoskeleton organization);GO:0051015(actin filament binding)	NA	NA	NA
0	ENSDARG00000005673	f3b	4.09857	2.04736	1.00136	0	0	coagulation factor IIIb [Source:ZFIN;Acc:ZDB-GENE-050417-234]	GO:0001944(vasculature development);GO:0004896(cytokine receptor activity);GO:0005515(protein binding);GO:0005886(plasma membrane);GO:0007596(blood coagulation);GO:0016020(membrane);GO:0016021(integral component of membrane);GO:0019221(cytokine-mediated signaling pathway)	04933(AGE-RAGE signaling pathway in diabetic complications)	K03901	NA
0	ENSDARG00000090767	si:ch211-136m16.8	6.19253	3.10408	0.996365	0	0	si:ch211-136m16.8 [Source:ZFIN;Acc:ZDB-GENE-121214-301]	NA	NA	NA	NA
0	ENSDARG00000088091	pfn1	136.659	68.7846	0.990422	0	0	profilin 1 [Source:ZFIN;Acc:ZDB-GENE-031002-33]	GO:0003779(actin binding);GO:0005737(cytoplasm);GO:0030036(actin cytoskeleton organization);GO:0030833(regulation of actin filament polymerization);GO:0032233(positive regulation of actin filament bundle assembly);GO:0055113(epiboly involved in gastrulation with mouth forming second);GO:0060027(convergent extension involved in gastrulation)	NA	NA	NA
0	ENSDARG00000098787	cd7al	4.45076	2.24216	0.989162	0	0	cd7 antigen-like [Source:ZFIN;Acc:ZDB-GENE-061207-47]	GO:0016020(membrane);GO:0016021(integral component of membrane)	NA	NA	NA
0	ENSDARG00000102435	plekhf1	4.82626	2.43621	0.986265	0	0	pleckstrin homology domain containing, family F (with FYVE domain) member 1 [Source:ZFIN;Acc:ZDB-GENE-040426-1289]	GO:0035091(phosphatidylinositol binding);GO:0046872(metal ion binding)	NA	NA	NA
0	ENSDARG00000006029	lta4h	5.10191	2.57954	0.983926	0	0	leukotriene A4 hydrolase [Source:ZFIN;Acc:ZDB-GENE-040426-2477]	GO:0004301(epoxide hydrolase activity);GO:0004463(leukotriene-A4 hydrolase activity);GO:0005634(nucleus);GO:0005737(cytoplasm);GO:0006508(proteolysis);GO:0006954(inflammatory response);GO:0008233(peptidase activity);GO:0008237(metallopeptidase activity);GO:0008270(zinc ion binding);GO:0009617(response to bacterium);GO:0016787(hydrolase activity);GO:0019370(leukotriene biosynthetic process);GO:003…	00590(Arachidonic acid metabolism)	K01254	EC:3.3.2.6
0	ENSDARG00000077130	bcl10	4.84703	2.45419	0.981854	0	0	BCL10, immune signaling adaptor [Source:ZFIN;Acc:ZDB-GENE-100219-2]	GO:0005737(cytoplasm);GO:0006915(apoptotic process);GO:0032449(CBM complex);GO:0042981(regulation of apoptotic process);GO:0051092(positive regulation of NF-kappaB transcription factor activity)	04625(C-type lectin receptor signaling pathway)	K07368	NA
0	ENSDARG00000070669	cxcr3.3	4.63577	2.35203	0.9789	0	0	chemokine (C-X-C motif) receptor 3, tandem duplicate 3 [Source:ZFIN;Acc:ZDB-GENE-100922-34]	GO:0002685(regulation of leukocyte migration);GO:0004930(G protein-coupled receptor activity);GO:0006935(chemotaxis);GO:0006954(inflammatory response);GO:0006955(immune response);GO:0007186(G protein-coupled receptor signaling pathway);GO:0007204(positive regulation of cytosolic calcium ion concentration);GO:0009897(external side of plasma membrane);GO:0016020(membrane);GO:0016021(integral compon…	NA	NA	NA
0	ENSDARG00000039269	arg2	8.26611	4.19806	0.977485	0	0	arginase 2 [Source:ZFIN;Acc:ZDB-GENE-030131-1334]	GO:0000050(urea cycle);GO:0004053(arginase activity);GO:0005737(cytoplasm);GO:0006525(arginine metabolic process);GO:0016787(hydrolase activity);GO:0016813(hydrolase activity, acting on carbon-nitrogen (but not peptide) bonds, in linear amidines);GO:0019547(arginine catabolic process to ornithine);GO:0030145(manganese ion binding);GO:0046872(metal ion binding)	00220(Arginine biosynthesis);00330(Arginine and proline metabolism)	K01476	EC:3.5.3.1
0	ENSDARG00000075664	si:ch1073-429i10.1	13.9736	7.10188	0.976434	0	0	si:ch1073-429i10.1 [Source:ZFIN;Acc:ZDB-GENE-120215-259]	GO:0005637(nuclear inner membrane);GO:0006629(lipid metabolic process);GO:0016020(membrane);GO:0016021(integral component of membrane);GO:0016126(sterol biosynthetic process);GO:0016627(oxidoreductase activity, acting on the CH-CH group of donors);GO:0030176(integral component of endoplasmic reticulum membrane);GO:0055114(oxidation-reduction process)	NA	NA	NA
0	ENSDARG00000104325	plek	5.40248	2.7538	0.972198	0	0	pleckstrin [Source:ZFIN;Acc:ZDB-GENE-040426-1506]	GO:0005886(plasma membrane);GO:0031532(actin cytoskeleton reorganization);GO:0035556(intracellular signal transduction)	NA	K19993	NA
0	ENSDARG00000025428	socs3a	7.55111	3.85228	0.970977	0	0	suppressor of cytokine signaling 3a [Source:ZFIN;Acc:ZDB-GENE-030131-7349]	GO:0005942(phosphatidylinositol 3-kinase complex);GO:0007259(receptor signaling pathway via JAK-STAT);GO:0016567(protein ubiquitination);GO:0031099(regeneration);GO:0035556(intracellular signal transduction);GO:0035677(posterior lateral line neuromast hair cell development);GO:0043066(negative regulation of apoptotic process);GO:0043551(regulation of phosphatidylinositol 3-kinase activity);GO:004…	NA	NA	NA
0	ENSDARG00000034293	hif1ab	7.88629	4.03294	0.967513	0	0	hypoxia inducible factor 1 subunit alpha b [Source:ZFIN;Acc:ZDB-GENE-040426-706]	GO:0000976(transcription regulatory region sequence-specific DNA binding);GO:0000981(DNA-binding transcription factor activity, RNA polymerase II-specific);GO:0001666(response to hypoxia);GO:0001755(neural crest cell migration);GO:0003682(chromatin binding);GO:0003700(DNA-binding transcription factor activity);GO:0005515(protein binding);GO:0005634(nucleus);GO:0006355(regulation of transcription,…	04137(Mitophagy - animal);04140(Autophagy - animal)	K08268	NA
0	ENSDARG00000036282	rnaset2	5.75084	2.94687	0.964588	0	0	ribonuclease T2 [Source:ZFIN;Acc:ZDB-GENE-030131-2513]	GO:0003723(RNA binding);GO:0004518(nuclease activity);GO:0004519(endonuclease activity);GO:0004521(endoribonuclease activity);GO:0005576(extracellular region);GO:0005764(lysosome);GO:0005783(endoplasmic reticulum);GO:0005788(endoplasmic reticulum lumen);GO:0006401(RNA catabolic process);GO:0016075(rRNA catabolic process);GO:0016787(hydrolase activity);GO:0033897(ribonuclease T2 activity);GO:00432…	NA	K01166	EC:4.6.1.19
0	ENSDARG00000078824	si:ch211-66e2.3	3.34525	1.72209	0.957951	0	0	si:ch211-66e2.3 [Source:ZFIN;Acc:ZDB-GENE-080226-7]	GO:0016020(membrane);GO:0098609(cell-cell adhesion)	NA	NA	NA
0	ENSDARG00000015657	zgc:77112	3.23623	1.6733	0.95162	0	0	zgc:77112 [Source:ZFIN;Acc:ZDB-GENE-040426-2219]	GO:0000164(protein phosphatase type 1 complex);GO:0001878(response to yeast);GO:0005515(protein binding);GO:0005975(carbohydrate metabolic process);GO:0005977(glycogen metabolic process);GO:0005981(regulation of glycogen catabolic process);GO:0019888(protein phosphatase regulator activity);GO:0043666(regulation of phosphoprotein phosphatase activity)	04910(Insulin signaling pathway)	K07189	NA
0	ENSDARG00000105068	SMIM22	3.10804	1.62229	0.93797	0	0	si:ch1073-443f11.2 [Source:ZFIN;Acc:ZDB-GENE-120215-185]	GO:0016020(membrane);GO:0016021(integral component of membrane)	NA	NA	NA
0	ENSDARG00000044694	fybb	4.94075	2.57908	0.937875	0	0	FYN binding protein b [Source:ZFIN;Acc:ZDB-GENE-091204-85]	GO:0005515(protein binding);GO:0005886(plasma membrane);GO:0006955(immune response);GO:0007229(integrin-mediated signaling pathway);GO:0015629(actin cytoskeleton);GO:0050852(T cell receptor signaling pathway);GO:0072659(protein localization to plasma membrane)	NA	NA	NA
0	ENSDARG00000074771	ifngr1	2.46143	1.28866	0.933621	0	0	interferon gamma receptor 1 [Source:ZFIN;Acc:ZDB-GENE-081022-158]	GO:0004896(cytokine receptor activity);GO:0004904(interferon receptor activity);GO:0005515(protein binding);GO:0005886(plasma membrane);GO:0016020(membrane);GO:0016021(integral component of membrane);GO:0019221(cytokine-mediated signaling pathway);GO:0030097(hemopoiesis);GO:0098508(endothelial to hematopoietic transition)	NA	NA	NA
0	ENSDARG00000105096	si:ch1073-67j19.1	5.39483	2.84535	0.92297	0	0	si:ch1073-67j19.1 [Source:ZFIN;Acc:ZDB-GENE-141216-297]	GO:0005829(cytosol)	NA	NA	NA
0	ENSDARG00000024116	vamp8	3.60449	1.90197	0.922298	0	0	vesicle-associated membrane protein 8 (endobrevin) [Source:ZFIN;Acc:ZDB-GENE-030131-5215]	GO:0016020(membrane);GO:0016021(integral component of membrane);GO:0016192(vesicle-mediated transport)	04130(SNARE interactions in vesicular transport);04140(Autophagy - animal)	K08512	NA
0	ENSDARG00000044039	stx11a	4.6738	2.47108	0.919453	0	0	syntaxin 11a [Source:ZFIN;Acc:ZDB-GENE-040426-2564]	GO:0000149(SNARE binding);GO:0005484(SNAP receptor activity);GO:0005794(Golgi apparatus);GO:0005886(plasma membrane);GO:0006886(intracellular protein transport);GO:0006887(exocytosis);GO:0006906(vesicle fusion);GO:0008021(synaptic vesicle);GO:0012505(endomembrane system);GO:0016020(membrane);GO:0016021(integral component of membrane);GO:0016192(vesicle-mediated transport);GO:0031201(SNARE complex…	04130(SNARE interactions in vesicular transport)	K08487	NA
0	ENSDARG00000053858	crip1	18.0046	9.5448	0.915579	0	0	cysteine-rich protein 1 [Source:ZFIN;Acc:ZDB-GENE-041111-1]	GO:0003680(AT DNA binding);GO:0005737(cytoplasm);GO:0007507(heart development);GO:0008270(zinc ion binding);GO:0008301(DNA binding, bending);GO:0008630(intrinsic apoptotic signaling pathway in response to DNA damage);GO:0010043(response to zinc ion);GO:0042277(peptide binding);GO:0046872(metal ion binding);GO:0060047(heart contraction);GO:0071236(cellular response to antibiotic);GO:0071493(cellul…	NA	NA	NA
0	ENSDARG00000074782	adgrg3	4.16251	2.24708	0.889402	0	0	adhesion G protein-coupled receptor G3 [Source:ZFIN;Acc:ZDB-GENE-140106-110]	GO:0004888(transmembrane signaling receptor activity);GO:0004930(G protein-coupled receptor activity);GO:0005887(integral component of plasma membrane);GO:0007166(cell surface receptor signaling pathway);GO:0007186(G protein-coupled receptor signaling pathway);GO:0007189(adenylate cyclase-activating G protein-coupled receptor signaling pathway);GO:0016020(membrane);GO:0016021(integral component o…	NA	K08452	NA
0	ENSDARG00000098853	ehd1a	3.33005	1.80313	0.885035	0	0	EH-domain containing 1a [Source:ZFIN;Acc:ZDB-GENE-040426-2518]	GO:0005509(calcium ion binding);GO:0005515(protein binding);GO:0005525(GTP binding);GO:0005575(cellular_component);GO:0005623(cell);GO:0032456(endocytic recycling);GO:0060271(cilium assembly)	04144(Endocytosis)	K12483	NA
0	ENSDARG00000097901	si:ch73-90p23.1	1.70246	0.927041	0.876917	0	0	si:ch73-90p23.1 [Source:ZFIN;Acc:ZDB-GENE-131121-421]	GO:0004930(G protein-coupled receptor activity);GO:0007186(G protein-coupled receptor signaling pathway);GO:0016020(membrane);GO:0016021(integral component of membrane)	NA	K04328	NA
0	ENSDARG00000026829	cotl1	17.6927	9.64265	0.875654	0	0	coactosin-like F-actin binding protein 1 [Source:ZFIN;Acc:ZDB-GENE-030131-8325]	GO:0003779(actin binding);GO:0005622(intracellular)	NA	NA	NA
0	ENSDARG00000096331	si:ch73-248e21.7	4.45135	2.43875	0.868098	0	0	si:ch73-248e21.7 [Source:ZFIN;Acc:ZDB-GENE-120215-231]	GO:0016020(membrane);GO:0016021(integral component of membrane)	NA	NA	NA
0	ENSDARG00000036965	rnf24	2.62015	1.43685	0.866742	0	0	ring finger protein 24 [Source:ZFIN;Acc:ZDB-GENE-041114-40]	GO:0005794(Golgi apparatus);GO:0008270(zinc ion binding);GO:0012505(endomembrane system);GO:0016020(membrane);GO:0016021(integral component of membrane);GO:0016567(protein ubiquitination);GO:0046872(metal ion binding);GO:0061630(ubiquitin protein ligase activity)	NA	NA	NA
0	ENSDARG00000018283	cyba	7.16452	3.93587	0.864185	0	0	cytochrome b-245, alpha polypeptide [Source:ZFIN;Acc:ZDB-GENE-040426-1526]	GO:0005886(plasma membrane);GO:0016020(membrane);GO:0016021(integral component of membrane);GO:0016175(superoxide-generating NADPH oxidase activity);GO:0016491(oxidoreductase activity);GO:0020037(heme binding);GO:0042554(superoxide anion generation);GO:0043020(NADPH oxidase complex);GO:0046872(metal ion binding);GO:0048246(macrophage chemotaxis);GO:0055114(oxidation-reduction process);GO:1990266(…	04145(Phagosome);04621(NOD-like receptor signaling pathway)	K08009	NA
0	ENSDARG00000103720	zgc:162730	12.3901	6.82866	0.859508	0	0	zgc:162730 [Source:ZFIN;Acc:ZDB-GENE-030131-6366]	GO:0003730(mRNA 3'-UTR binding);GO:0005829(cytosol);GO:0046872(metal ion binding);GO:0061158(3'-UTR-mediated mRNA destabilization)	NA	NA	NA
0	ENSDARG00000087152	sowahd	3.70902	2.04688	0.857615	0	0	sosondowah ankyrin repeat domain family d [Source:ZFIN;Acc:ZDB-GENE-120215-42]	GO:0005515(protein binding)	NA	NA	NA
0	ENSDARG00000068382	pglyrp5	7.00839	3.87535	0.854754	0	0	peptidoglycan recognition protein 5 [Source:ZFIN;Acc:ZDB-GENE-050419-71]	GO:0002221(pattern recognition receptor signaling pathway);GO:0005615(extracellular space);GO:0008270(zinc ion binding);GO:0008745(N-acetylmuramoyl-L-alanine amidase activity);GO:0009253(peptidoglycan catabolic process);GO:0016019(peptidoglycan receptor activity);GO:0016045(detection of bacterium);GO:0019730(antimicrobial humoral response);GO:0031640(killing of cells of other organism);GO:0032689…	NA	K01446	NA
0	ENSDARG00000105481	si:ch211-243a20.4	2.54922	1.41236	0.851949	0	0	si:ch211-243a20.4 [Source:ZFIN;Acc:ZDB-GENE-061207-29]	GO:0001819(positive regulation of cytokine production);GO:0004888(transmembrane signaling receptor activity);GO:0016020(membrane);GO:0016021(integral component of membrane);GO:0045577(regulation of B cell differentiation);GO:0050861(positive regulation of B cell receptor signaling pathway)	NA	NA	NA
0	ENSDARG00000025147	cd63	23.4769	13.0412	0.848167	0	0	CD63 molecule [Source:ZFIN;Acc:ZDB-GENE-030131-180]	GO:0005887(integral component of plasma membrane);GO:0007166(cell surface receptor signaling pathway);GO:0016020(membrane);GO:0016021(integral component of membrane);GO:0035188(hatching)	04142(Lysosome)	K06497	NA
0	ENSDARG00000013310	map3k15	2.09095	1.1641	0.844942	0	0	mitogen-activated protein kinase kinase kinase 15 [Source:ZFIN;Acc:ZDB-GENE-091204-246]	GO:0000165(MAPK cascade);GO:0000166(nucleotide binding);GO:0000186(activation of MAPKK activity);GO:0004672(protein kinase activity);GO:0004709(MAP kinase kinase kinase activity);GO:0005524(ATP binding);GO:0006468(protein phosphorylation);GO:0016301(kinase activity);GO:0016310(phosphorylation);GO:0016740(transferase activity)	NA	K13986	EC:2.7.11.25
0	ENSDARG00000028389	rab44	3.52743	1.96604	0.843323	0	0	RAB44, member RAS oncogene family [Source:ZFIN;Acc:ZDB-GENE-040724-117]	GO:0003924(GTPase activity);GO:0005525(GTP binding);GO:0005623(cell);GO:0006886(intracellular protein transport);GO:0032482(Rab protein signal transduction)	NA	NA	NA
0	ENSDARG00000033170	sult2st1	5.48936	3.06343	0.841488	0	0	sulfotransferase family 2, cytosolic sulfotransferase 1 [Source:ZFIN;Acc:ZDB-GENE-030219-114]	GO:0008146(sulfotransferase activity);GO:0016740(transferase activity);GO:0016783(sulfurtransferase activity)	NA	NA	NA
0	ENSDARG00000055759	efhd2	3.41743	1.91002	0.839323	0	0	EF-hand domain family, member D2 [Source:ZFIN;Acc:ZDB-GENE-060531-152]	GO:0005509(calcium ion binding)	NA	NA	NA
0	ENSDARG00000075121	hbegfa	4.56433	2.55687	0.836024	0	0	heparin-binding EGF-like growth factor a [Source:ZFIN;Acc:ZDB-GENE-080204-119]	GO:0005154(epidermal growth factor receptor binding);GO:0005615(extracellular space);GO:0007173(epidermal growth factor receptor signaling pathway);GO:0008083(growth factor activity);GO:0008284(positive regulation of cell population proliferation);GO:0009611(response to wounding);GO:0010469(regulation of signaling receptor activity);GO:0016020(membrane);GO:0016021(integral component of membrane);…	04012(ErbB signaling pathway);04912(GnRH signaling pathway)	K08523	NA
0	ENSDARG00000014348	stk17b	3.23233	1.81139	0.835477	0	0	serine/threonine kinase 17b (apoptosis-inducing) [Source:ZFIN;Acc:ZDB-GENE-040426-1499]	GO:0000166(nucleotide binding);GO:0004672(protein kinase activity);GO:0004674(protein serine/threonine kinase activity);GO:0005524(ATP binding);GO:0005634(nucleus);GO:0006468(protein phosphorylation);GO:0016301(kinase activity);GO:0016310(phosphorylation)	NA	K08804	EC:2.7.11.1
0	ENSDARG00000098443	zfand6	3.44122	1.93698	0.829108	0	0	zinc finger, AN1-type domain 6 [Source:ZFIN;Acc:ZDB-GENE-030131-8405]	GO:0003677(DNA binding);GO:0005575(cellular_component);GO:0008270(zinc ion binding);GO:0046872(metal ion binding)	NA	NA	NA
0	ENSDARG00000034117	rarga	3.07406	1.73067	0.828816	0	0	retinoic acid receptor gamma a [Source:ZFIN;Acc:ZDB-GENE-980526-531]	GO:0000122(negative regulation of transcription by RNA polymerase II);GO:0000976(transcription regulatory region sequence-specific DNA binding);GO:0000977(RNA polymerase II regulatory region sequence-specific DNA binding);GO:0000981(DNA-binding transcription factor activity, RNA polymerase II-specific);GO:0001889(liver development);GO:0003677(DNA binding);GO:0003700(DNA-binding transcription fact…	NA	K08529	NA
0	ENSDARG00000109289	mrps15	3.61766	2.03702	0.828594	0	0	mitochondrial ribosomal protein S15 [Source:ZFIN;Acc:ZDB-GENE-040718-188]	GO:0003735(structural constituent of ribosome);GO:0005622(intracellular);GO:0005739(mitochondrion);GO:0005763(mitochondrial small ribosomal subunit);GO:0005840(ribosome);GO:0006412(translation)	03010(Ribosome)	K02956	NA
0	ENSDARG00000056499	ca6	1.64074	0.927916	0.822282	0	0	carbonic anhydrase VI [Source:ZFIN;Acc:ZDB-GENE-030131-7091]	GO:0004089(carbonate dehydratase activity);GO:0006730(one-carbon metabolic process);GO:0008270(zinc ion binding);GO:0009986(cell surface);GO:0036269(swimming behavior);GO:0046872(metal ion binding)	00910(Nitrogen metabolism)	K01672	EC:4.2.1.1
0	ENSDARG00000026350	wasb	8.39404	4.75851	0.818856	0	0	Wiskott-Aldrich syndrome (eczema-thrombocytopenia) b [Source:ZFIN;Acc:ZDB-GENE-030131-7098]	GO:0000147(actin cortical patch assembly);GO:0003779(actin binding);GO:0005884(actin filament);GO:0006897(endocytosis);GO:0007015(actin filament organization);GO:0030048(actin filament-based movement);GO:0030479(actin cortical patch);GO:0030593(neutrophil chemotaxis);GO:0030595(leukocyte chemotaxis);GO:0048246(macrophage chemotaxis);GO:0051015(actin filament binding);GO:0051127(positive regulatio…	04144(Endocytosis);04520(Adherens junction);04530(Tight junction);04810(Regulation of actin cytoskeleton);05132(Salmonella infection)	K05747	NA
0	ENSDARG00000053381	plpp1a	2.51026	1.42328	0.818614	0	0	phospholipid phosphatase 1a [Source:ZFIN;Acc:ZDB-GENE-080225-26]	GO:0005886(plasma membrane);GO:0005887(integral component of plasma membrane);GO:0006629(lipid metabolic process);GO:0006644(phospholipid metabolic process);GO:0008195(phosphatidate phosphatase activity);GO:0016020(membrane);GO:0016021(integral component of membrane);GO:0016311(dephosphorylation);GO:0016791(phosphatase activity);GO:0042577(lipid phosphatase activity);GO:0046839(phospholipid depho…	00561(Glycerolipid metabolism);00564(Glycerophospholipid metabolism);00565(Ether lipid metabolism);00600(Sphingolipid metabolism)	K01080	EC:3.1.3.4
0	ENSDARG00000089706	si:ch211-276a23.5	2.02497	1.15263	0.812977	0	0	si:ch211-276a23.5 [Source:ZFIN;Acc:ZDB-GENE-141215-4]	GO:0004177(aminopeptidase activity);GO:0005737(cytoplasm);GO:0005886(plasma membrane);GO:0006508(proteolysis);GO:0008233(peptidase activity);GO:0008237(metallopeptidase activity);GO:0008270(zinc ion binding);GO:0016787(hydrolase activity);GO:0042277(peptide binding);GO:0043171(peptide catabolic process);GO:0046872(metal ion binding);GO:0070006(metalloaminopeptidase activity)	NA	NA	NA
0	ENSDARG00000074501	tnip2	3.16094	1.80203	0.810726	0	0	TNFAIP3 interacting protein 2 [Source:ZFIN;Acc:ZDB-GENE-120913-2]	GO:0070530(K63-linked polyubiquitin modification-dependent protein binding)	NA	NA	NA
0	ENSDARG00000062721	dennd4a	2.2933	1.31122	0.806521	0	0	DENN/MADD domain containing 4A [Source:ZFIN;Acc:ZDB-GENE-060503-285]	GO:0005515(protein binding)	NA	K20163	NA
0	ENSDARG00000117263	CABZ01056054.1	2.29972	1.32194	0.798806	0	0	NA	NA	NA	NA	NA
0	ENSDARG00000099148	bzw1b	14.8011	8.52897	0.795257	0	0	basic leucine zipper and W2 domains 1b [Source:ZFIN;Acc:ZDB-GENE-040426-2881]	GO:0005515(protein binding)	NA	NA	NA
0	ENSDARG00000056453	afap1l1b	3.27246	1.8975	0.786277	0	0	actin filament associated protein 1-like 1b [Source:ZFIN;Acc:ZDB-GENE-061013-428]	GO:0005575(cellular_component);GO:0008150(biological_process)	NA	NA	NA
0	ENSDARG00000088283	si:ch73-248e21.5	4.19878	2.4405	0.782794	0	0	si:ch73-248e21.5 [Source:ZFIN;Acc:ZDB-GENE-120215-255]	GO:0016020(membrane);GO:0016021(integral component of membrane)	NA	NA	NA
0	ENSDARG00000067797	spi1a	2.29724	1.35466	0.761969	0	0	Spi-1 proto-oncogene a [Source:ZFIN;Acc:ZDB-GENE-060825-351]	GO:0000981(DNA-binding transcription factor activity, RNA polymerase II-specific);GO:0002761(regulation of myeloid leukocyte differentiation);GO:0003677(DNA binding);GO:0003700(DNA-binding transcription factor activity);GO:0005634(nucleus);GO:0006355(regulation of transcription, DNA-templated);GO:0006357(regulation of transcription by RNA polymerase II);GO:0030154(cell differentiation);GO:0043565…	NA	NA	NA
0	ENSDARG00000045051	slc16a3	1.74375	1.03026	0.759182	0	0	solute carrier family 16 (monocarboxylate transporter), member 3 [Source:ZFIN;Acc:ZDB-GENE-030131-5487]	GO:0005887(integral component of plasma membrane);GO:0008028(monocarboxylic acid transmembrane transporter activity);GO:0015129(lactate transmembrane transporter activity);GO:0015718(monocarboxylic acid transport);GO:0016020(membrane);GO:0016021(integral component of membrane);GO:0035873(lactate transmembrane transport);GO:0055085(transmembrane transport)	NA	K08180	NA
0	ENSDARG00000057053	zgc:91976	2.40419	1.42899	0.750556	0	0	zgc:91976 [Source:ZFIN;Acc:ZDB-GENE-041114-201]	GO:0005515(protein binding);GO:0005887(integral component of plasma membrane);GO:0006686(sphingomyelin biosynthetic process);GO:0016020(membrane);GO:0016021(integral component of membrane);GO:0030148(sphingolipid biosynthetic process);GO:0030173(integral component of Golgi membrane);GO:0030176(integral component of endoplasmic reticulum membrane);GO:0033188(sphingomyelin synthase activity);GO:004…	NA	NA	NA
0	ENSDARG00000067545	adam19b	2.24496	1.33456	0.75032	0	0	ADAM metallopeptidase domain 19b [Source:ZFIN;Acc:ZDB-GENE-070705-541]	GO:0004222(metalloendopeptidase activity);GO:0005794(Golgi apparatus);GO:0006508(proteolysis);GO:0006509(membrane protein ectodomain proteolysis);GO:0008237(metallopeptidase activity);GO:0016020(membrane);GO:0016021(integral component of membrane);GO:0017124(SH3 domain binding)	NA	K08608	EC:3.4.24.-
0	ENSDARG00000045525	tmcc3	2.67185	1.59085	0.748041	0	0	transmembrane and coiled-coil domain family 3 [Source:ZFIN;Acc:ZDB-GENE-030131-1811]	GO:0016020(membrane);GO:0016021(integral component of membrane)	NA	NA	NA
0	ENSDARG00000074818	si:cabz01036022.1	2.02191	1.20403	0.74784	0	0	si:cabz01036022.1 [Source:ZFIN;Acc:ZDB-GENE-160113-144]	GO:0016020(membrane);GO:0016021(integral component of membrane)	NA	NA	NA
0	ENSDARG00000105232	si:ch211-260e23.8	1.53362	0.915329	0.74458	0	0	si:ch211-260e23.8 [Source:ZFIN;Acc:ZDB-GENE-141216-116]	NA	NA	NA	NA
0	ENSDARG00000076229	mrtfab	2.87632	1.71837	0.74318	0	0	myocardin related transcription factor Ab [Source:ZFIN;Acc:ZDB-GENE-030131-681]	GO:0003713(transcription coactivator activity);GO:0003779(actin binding);GO:0003785(actin monomer binding);GO:0004864(protein phosphatase inhibitor activity);GO:0005634(nucleus);GO:0005737(cytoplasm);GO:0010735(positive regulation of transcription via serum response element binding);GO:0032515(negative regulation of phosphoprotein phosphatase activity);GO:0051145(smooth muscle cell differentiatio…	NA	K22525	NA
0	ENSDARG00000021647	gnai1	4.22187	2.52354	0.742434	0	0	guanine nucleotide binding protein (G protein), alpha inhibiting activity polypeptide 1 [Source:ZFIN;Acc:ZDB-GENE-040426-1310]	GO:0000166(nucleotide binding);GO:0001664(G protein-coupled receptor binding);GO:0003924(GTPase activity);GO:0005525(GTP binding);GO:0005834(heterotrimeric G-protein complex);GO:0007165(signal transduction);GO:0007186(G protein-coupled receptor signaling pathway);GO:0007188(adenylate cyclase-modulating G protein-coupled receptor signaling pathway);GO:0019001(guanyl nucleotide binding);GO:0031683(…	04261(Adrenergic signaling in cardiomyocytes);04371(Apelin signaling pathway);04540(Gap junction);04914(Progesterone-mediated oocyte maturation);04916(Melanogenesis)	K04630	NA
0	ENSDARG00000007769	sult5a1	2.24289	1.34135	0.741674	0	0	sulfotransferase family 5A, member 1 [Source:ZFIN;Acc:ZDB-GENE-060929-978]	GO:0005575(cellular_component);GO:0008146(sulfotransferase activity);GO:0016740(transferase activity)	NA	NA	NA
0	ENSDARG00000019236	gsr	3.21072	1.92055	0.741377	0	0	glutathione reductase [Source:ZFIN;Acc:ZDB-GENE-050522-116]	GO:0004362(glutathione-disulfide reductase activity);GO:0005737(cytoplasm);GO:0005739(mitochondrion);GO:0005829(cytosol);GO:0006749(glutathione metabolic process);GO:0009055(electron transfer activity);GO:0016491(oxidoreductase activity);GO:0016668(oxidoreductase activity, acting on a sulfur group of donors, NAD(P) as acceptor);GO:0022900(electron transport chain);GO:0034599(cellular response to …	00480(Glutathione metabolism)	K00383	EC:1.8.1.7
0	ENSDARG00000043624	pqlc2	1.74369	1.04489	0.738794	0	0	PQ loop repeat containing 2 [Source:ZFIN;Acc:ZDB-GENE-050306-4]	GO:0005765(lysosomal membrane);GO:0008150(biological_process);GO:0015174(basic amino acid transmembrane transporter activity);GO:0015181(arginine transmembrane transporter activity);GO:0015189(L-lysine transmembrane transporter activity);GO:0016020(membrane);GO:0016021(integral component of membrane);GO:1903401(L-lysine transmembrane transport);GO:1903826(arginine transmembrane transport);GO:1990…	NA	NA	NA
0	ENSDARG00000058225	arpc4l	4.93782	2.96556	0.735572	0	0	actin related protein 2/3 complex, subunit 4, like [Source:ZFIN;Acc:ZDB-GENE-040808-18]	GO:0003779(actin binding);GO:0005737(cytoplasm);GO:0005856(cytoskeleton);GO:0005885(Arp2/3 protein complex);GO:0015629(actin cytoskeleton);GO:0030041(actin filament polymerization);GO:0030833(regulation of actin filament polymerization);GO:0034314(Arp2/3 complex-mediated actin nucleation)	04144(Endocytosis);04810(Regulation of actin cytoskeleton);05132(Salmonella infection)	K05755	NA
0	ENSDARG00000035459	spns3	2.11553	1.28169	0.722979	0	0	spinster homolog 3 (Drosophila) [Source:ZFIN;Acc:ZDB-GENE-060531-7]	GO:0006869(lipid transport);GO:0016020(membrane);GO:0016021(integral component of membrane);GO:0055085(transmembrane transport)	NA	NA	NA
0	ENSDARG00000029695	pgp	1.97332	1.19585	0.722588	0	0	phosphoglycolate phosphatase [Source:ZFIN;Acc:ZDB-GENE-030131-6240]	GO:0005737(cytoplasm);GO:0006114(glycerol biosynthetic process);GO:0006650(glycerophospholipid metabolic process);GO:0016311(dephosphorylation);GO:0016787(hydrolase activity);GO:0016791(phosphatase activity);GO:0043136(glycerol-3-phosphatase activity)	00630(Glyoxylate and dicarboxylate metabolism)	K19269	3.1.3.48;EC:3.1.3.18
0	ENSDARG00000044619	birc2	5.7315	3.47684	0.721137	0	0	baculoviral IAP repeat containing 2 [Source:ZFIN;Acc:ZDB-GENE-030825-6]	GO:0005634(nucleus);GO:0005737(cytoplasm);GO:0006915(apoptotic process);GO:0016567(protein ubiquitination);GO:0042981(regulation of apoptotic process);GO:0043027(cysteine-type endopeptidase inhibitor activity involved in apoptotic process);GO:0061630(ubiquitin protein ligase activity);GO:1990001(inhibition of cysteine-type endopeptidase activity involved in apoptotic process)	04120(Ubiquitin mediated proteolysis);04210(Apoptosis);04217(Necroptosis);04510(Focal adhesion);04621(NOD-like receptor signaling pathway);05168(Herpes simplex virus 1 infection)	K16060	NA
0	ENSDARG00000093248	si:dkey-238m4.4	1.38905	0.843922	0.718916	0	0	si:dkey-238m4.4 [Source:ZFIN;Acc:ZDB-GENE-100922-215]	GO:0016020(membrane);GO:0016021(integral component of membrane)	NA	NA	NA
0	ENSDARG00000016939	itgb2	3.50163	2.1347	0.713993	0	0	integrin, beta 2 [Source:ZFIN;Acc:ZDB-GENE-110411-4]	GO:0005178(integrin binding);GO:0005925(focal adhesion);GO:0007155(cell adhesion);GO:0007160(cell-matrix adhesion);GO:0007229(integrin-mediated signaling pathway);GO:0008305(integrin complex);GO:0009986(cell surface);GO:0016020(membrane);GO:0016021(integral component of membrane);GO:0016477(cell migration);GO:0033627(cell adhesion mediated by integrin);GO:0038023(signaling receptor activity)	04145(Phagosome);04514(Cell adhesion molecules (CAMs));04810(Regulation of actin cytoskeleton)	K06464	NA
0	ENSDARG00000058647	hck	3.76622	2.29683	0.713474	0	0	HCK proto-oncogene, Src family tyrosine kinase [Source:ZFIN;Acc:ZDB-GENE-090313-72]	GO:0000166(nucleotide binding);GO:0004672(protein kinase activity);GO:0004713(protein tyrosine kinase activity);GO:0004715(non-membrane spanning protein tyrosine kinase activity);GO:0005102(signaling receptor binding);GO:0005515(protein binding);GO:0005524(ATP binding);GO:0006468(protein phosphorylation);GO:0007169(transmembrane receptor protein tyrosine kinase signaling pathway);GO:0016301(kinas…	NA	K08893	EC:2.7.10.2
0	ENSDARG00000040284	si:dkey-79d12.5	5.10473	3.11422	0.712964	0	0	si:dkey-79d12.5 [Source:ZFIN;Acc:ZDB-GENE-131127-429]	GO:0005634(nucleus);GO:0005737(cytoplasm);GO:0008285(negative regulation of cell population proliferation);GO:0045930(negative regulation of mitotic cell cycle)	03018(RNA degradation)	K14443	NA
0	ENSDARG00000075989	arpc2	9.70768	5.92513	0.712278	0	0	actin related protein 2/3 complex, subunit 2 [Source:ZFIN;Acc:ZDB-GENE-030131-5276]	GO:0003779(actin binding);GO:0005200(structural constituent of cytoskeleton);GO:0005737(cytoplasm);GO:0005856(cytoskeleton);GO:0005885(Arp2/3 protein complex);GO:0015629(actin cytoskeleton);GO:0030041(actin filament polymerization);GO:0030833(regulation of actin filament polymerization);GO:0034314(Arp2/3 complex-mediated actin nucleation);GO:0051015(actin filament binding)	04144(Endocytosis);04810(Regulation of actin cytoskeleton);05132(Salmonella infection)	K05758	NA
0	ENSDARG00000077777	tmsb4x	114.213	69.7713	0.711028	0	0	thymosin beta 4 X-linked [Source:ZFIN;Acc:ZDB-GENE-030131-8304]	GO:0001947(heart looping);GO:0003181(atrioventricular valve morphogenesis);GO:0003779(actin binding);GO:0003785(actin monomer binding);GO:0005737(cytoplasm);GO:0005856(cytoskeleton);GO:0007015(actin filament organization);GO:0030334(regulation of cell migration);GO:0036302(atrioventricular canal development);GO:0042989(sequestering of actin monomers)	04810(Regulation of actin cytoskeleton)	K05764	NA
0	ENSDARG00000097513	CT573383.1	1.64519	1.00618	0.709357	0	0	annexin A2-A-like [Source:NCBI gene;Acc:100006250]	NA	NA	NA	NA
0	ENSDARG00000068628	rab8b	6.2802	3.84614	0.707399	0	0	RAB8B, member RAS oncogene family [Source:ZFIN;Acc:ZDB-GENE-070620-16]	GO:0003924(GTPase activity);GO:0005525(GTP binding);GO:0005768(endosome);GO:0005886(plasma membrane);GO:0006886(intracellular protein transport);GO:0006904(vesicle docking involved in exocytosis);GO:0008021(synaptic vesicle);GO:0009306(protein secretion);GO:0017157(regulation of exocytosis);GO:0030140(trans-Golgi network transport vesicle);GO:0032482(Rab protein signal transduction);GO:0032869(ce…	04530(Tight junction)	K07902	NA
0	ENSDARG00000069769	gig2j	1.25523	0.770303	0.704449	0	0	grass carp reovirus (GCRV)-induced gene 2j [Source:ZFIN;Acc:ZDB-GENE-081022-181]	GO:0003950(NAD+ ADP-ribosyltransferase activity);GO:0005575(cellular_component);GO:0005737(cytoplasm)	NA	NA	NA
0	ENSDARG00000076614	ssuh2.3	1.31016	0.804136	0.704232	0	0	ssu-2 homolog, tandem duplicate 3 [Source:ZFIN;Acc:ZDB-GENE-080516-4]	GO:0005575(cellular_component);GO:0008150(biological_process)	NA	NA	NA
0	ENSDARG00000112943	adgre5b.3.1	1.51135	0.928562	0.702766	0	0	adhesion G protein-coupled receptor E5b, duplicate 3 [Source:ZFIN;Acc:ZDB-GENE-121214-275]	GO:0004888(transmembrane signaling receptor activity);GO:0004930(G protein-coupled receptor activity);GO:0005509(calcium ion binding);GO:0005887(integral component of plasma membrane);GO:0007166(cell surface receptor signaling pathway);GO:0007186(G protein-coupled receptor signaling pathway);GO:0007189(adenylate cyclase-activating G protein-coupled receptor signaling pathway);GO:0016020(membrane)…	NA	K08446	NA
0	ENSDARG00000055064	prdx5	8.86178	5.44772	0.701944	0	0	peroxiredoxin 5 [Source:ZFIN;Acc:ZDB-GENE-050522-159]	GO:0005737(cytoplasm);GO:0005739(mitochondrion);GO:0005777(peroxisome);GO:0008379(thioredoxin peroxidase activity);GO:0016491(oxidoreductase activity);GO:0031101(fin regeneration);GO:0034599(cellular response to oxidative stress);GO:0042744(hydrogen peroxide catabolic process);GO:0045454(cell redox homeostasis);GO:0055114(oxidation-reduction process);GO:0098869(cellular oxidant detoxification)	04146(Peroxisome)	K11187	EC:1.11.1.15
0	ENSDARG00000039914	gapdhs	15.371	9.46136	0.700096	0	0	glyceraldehyde-3-phosphate dehydrogenase, spermatogenic [Source:ZFIN;Acc:ZDB-GENE-020913-1]	GO:0000166(nucleotide binding);GO:0004365(glyceraldehyde-3-phosphate dehydrogenase (NAD+) (phosphorylating) activity);GO:0006006(glucose metabolic process);GO:0006096(glycolytic process);GO:0016491(oxidoreductase activity);GO:0016620(oxidoreductase activity, acting on the aldehyde or oxo group of donors, NAD or NADP as acceptor);GO:0050661(NADP binding);GO:0051287(NAD binding);GO:0055114(oxidatio…	00010(Glycolysis / Gluconeogenesis)	K10705	EC:1.2.1.12
0	ENSDARG00000104636	si:dkey-112a7.4	7.0736	4.36071	0.697882	0	0	si:dkey-112a7.4 [Source:ZFIN;Acc:ZDB-GENE-030131-9661]	GO:0004860(protein kinase inhibitor activity);GO:0006469(negative regulation of protein kinase activity)	NA	NA	NA
0	ENSDARG00000056615	cybb	2.50536	1.54835	0.694284	0	0	cytochrome b-245, beta polypeptide (chronic granulomatous disease) [Source:ZFIN;Acc:ZDB-GENE-040426-1380]	GO:0005886(plasma membrane);GO:0006952(defense response);GO:0016020(membrane);GO:0016021(integral component of membrane);GO:0016175(superoxide-generating NADPH oxidase activity);GO:0016491(oxidoreductase activity);GO:0042554(superoxide anion generation);GO:0043020(NADPH oxidase complex);GO:0055114(oxidation-reduction process)	04145(Phagosome);04216(Ferroptosis);04217(Necroptosis);04621(NOD-like receptor signaling pathway);04933(AGE-RAGE signaling pathway in diabetic complications)	K21421	EC:1.-.-.-
0	ENSDARG00000089368	hopx	2.64744	1.64743	0.684386	0	0	HOP homeobox [Source:ZFIN;Acc:ZDB-GENE-031016-2]	GO:0003677(DNA binding);GO:0005634(nucleus);GO:0005737(cytoplasm);GO:0007275(multicellular organism development);GO:0007507(heart development);GO:0030154(cell differentiation)	NA	NA	NA
0	ENSDARG00000038010	rac2	8.866	5.52886	0.681301	0	0	Rac family small GTPase 2 [Source:ZFIN;Acc:ZDB-GENE-040625-27]	GO:0000166(nucleotide binding);GO:0001780(neutrophil homeostasis);GO:0002446(neutrophil mediated immunity);GO:0002685(regulation of leukocyte migration);GO:0003924(GTPase activity);GO:0005525(GTP binding);GO:0005622(intracellular);GO:0005737(cytoplasm);GO:0005886(plasma membrane);GO:0007264(small GTPase mediated signal transduction);GO:0007266(Rho protein signal transduction);GO:0008045(motor neu…	04010(MAPK signaling pathway);04310(Wnt signaling pathway);04370(VEGF signaling pathway);04510(Focal adhesion);04520(Adherens junction);04810(Regulation of actin cytoskeleton)	K07860	NA
0	ENSDARG00000099766	myl12.1	9.54506	5.96475	0.678293	0	0	myosin, light chain 12, genome duplicate 1 [Source:ZFIN;Acc:ZDB-GENE-030131-4918]	GO:0005509(calcium ion binding)	04270(Vascular smooth muscle contraction);04510(Focal adhesion);04530(Tight junction);04810(Regulation of actin cytoskeleton)	K12755	NA
0	ENSDARG00000060723	stim1a	2.84296	1.77693	0.678008	0	0	stromal interaction molecule 1a [Source:ZFIN;Acc:ZDB-GENE-060503-914]	GO:0002115(store-operated calcium entry);GO:0005246(calcium channel regulator activity);GO:0005509(calcium ion binding);GO:0005515(protein binding);GO:0005783(endoplasmic reticulum);GO:0005886(plasma membrane);GO:0006874(cellular calcium ion homeostasis);GO:0016020(membrane);GO:0016021(integral component of membrane);GO:0030176(integral component of endoplasmic reticulum membrane);GO:0032237(acti…	04020(Calcium signaling pathway)	K16059	NA
0	ENSDARG00000094097	CR936321.1	3.50768	2.19499	0.676299	0	0	si:ch211-209a2.1 [Source:NCBI gene;Acc:100536508]	NA	NA	NA	NA
0	ENSDARG00000017320	f11r.1	2.54061	1.59068	0.67553	0	0	F11 receptor, tandem duplicate 1 [Source:ZFIN;Acc:ZDB-GENE-030131-2416]	GO:0005923(bicellular tight junction);GO:0016020(membrane);GO:0016021(integral component of membrane);GO:0046982(protein heterodimerization activity);GO:0048534(hematopoietic or lymphoid organ development);GO:0048916(posterior lateral line development);GO:0050892(intestinal absorption);GO:0090557(establishment of endothelial intestinal barrier);GO:0090559(regulation of membrane permeability);GO:1…	04514(Cell adhesion molecules (CAMs));04530(Tight junction)	K06089	NA
0	ENSDARG00000002344	tubb4b	16.0929	10.0906	0.673406	0	0	tubulin, beta 4B class IVb [Source:ZFIN;Acc:ZDB-GENE-030131-8625]	GO:0000166(nucleotide binding);GO:0000226(microtubule cytoskeleton organization);GO:0000278(mitotic cell cycle);GO:0003924(GTPase activity);GO:0005200(structural constituent of cytoskeleton);GO:0005525(GTP binding);GO:0005737(cytoplasm);GO:0005856(cytoskeleton);GO:0005874(microtubule);GO:0007017(microtubule-based process);GO:0060271(cilium assembly)	04145(Phagosome);04540(Gap junction)	K07375	NA
0	ENSDARG00000104372	gnb1b	8.04231	5.04651	0.672326	0	0	guanine nucleotide binding protein (G protein), beta polypeptide 1b [Source:ZFIN;Acc:ZDB-GENE-040426-2855]	GO:0005515(protein binding);GO:0007165(signal transduction);GO:0048920(posterior lateral line neuromast primordium migration);GO:1902624(positive regulation of neutrophil migration)	04371(Apelin signaling pathway);04744(Phototransduction)	K04536	NA
0	ENSDARG00000036940	ctss1	1.70368	1.0713	0.669293	0	0	cathepsin S, ortholog 1 [Source:ZFIN;Acc:ZDB-GENE-040426-1583]	GO:0004197(cysteine-type endopeptidase activity);GO:0005615(extracellular space);GO:0005764(lysosome);GO:0006508(proteolysis);GO:0008233(peptidase activity);GO:0008234(cysteine-type peptidase activity);GO:0016787(hydrolase activity);GO:0051603(proteolysis involved in cellular protein catabolic process)	04142(Lysosome);04145(Phagosome);04210(Apoptosis)	K01368	EC:3.4.22.27
0	ENSDARG00000041078	chka	2.2617	1.42458	0.666869	0	0	choline kinase alpha [Source:ZFIN;Acc:ZDB-GENE-050208-149]	GO:0005575(cellular_component)	00564(Glycerophospholipid metabolism)	K14156	2.7.1.82;EC:2.7.1.32
0	ENSDARG00000027249	btg1	24.562	15.5077	0.663446	0	0	B-cell translocation gene 1, anti-proliferative [Source:ZFIN;Acc:ZDB-GENE-010726-1]	GO:0005634(nucleus);GO:0005737(cytoplasm);GO:0008285(negative regulation of cell population proliferation);GO:0045930(negative regulation of mitotic cell cycle)	03018(RNA degradation)	K14443	NA
0	ENSDARG00000100461	CABZ01078737.1	1.30754	0.826157	0.662366	0	0	interleukin-1 receptor type 2 [Source:NCBI gene;Acc:101882195]	GO:0016020(membrane);GO:0016021(integral component of membrane)	NA	NA	NA
0	ENSDARG00000103735	elovl1b	3.73978	2.36828	0.659111	0	0	ELOVL fatty acid elongase 1b [Source:ZFIN;Acc:ZDB-GENE-040426-2755]	GO:0001822(kidney development);GO:0005783(endoplasmic reticulum);GO:0005789(endoplasmic reticulum membrane);GO:0006629(lipid metabolic process);GO:0006631(fatty acid metabolic process);GO:0006633(fatty acid biosynthetic process);GO:0006636(unsaturated fatty acid biosynthetic process);GO:0009922(fatty acid elongase activity);GO:0016020(membrane);GO:0016021(integral component of membrane);GO:001674…	00062(Fatty acid elongation);01040(Biosynthesis of unsaturated fatty acids)	K10247	EC:2.3.1.199
0	ENSDARG00000041041	cxcr3.2	2.13	1.35182	0.655949	0	0	chemokine (C-X-C motif) receptor 3, tandem duplicate 2 [Source:ZFIN;Acc:ZDB-GENE-041114-186]	GO:0002281(macrophage activation involved in immune response);GO:0002376(immune system process);GO:0002522(leukocyte migration involved in immune response);GO:0004930(G protein-coupled receptor activity);GO:0005886(plasma membrane);GO:0006935(chemotaxis);GO:0006955(immune response);GO:0007165(signal transduction);GO:0007186(G protein-coupled receptor signaling pathway);GO:0007204(positive regulat…	04060(Cytokine-cytokine receptor interaction)	K04188	NA
0	ENSDARG00000030116	susd6	2.50445	1.59032	0.655173	0	0	sushi domain containing 6 [Source:ZFIN;Acc:ZDB-GENE-030131-8832]	GO:0003674(molecular_function);GO:0008150(biological_process);GO:0016020(membrane);GO:0016021(integral component of membrane)	NA	NA	NA
0	ENSDARG00000103207	rab11fip4b	2.33973	1.48613	0.654782	0	0	RAB11 family interacting protein 4 (class II) b [Source:ZFIN;Acc:ZDB-GENE-080722-8]	GO:0005768(endosome);GO:0005813(centrosome);GO:0007049(cell cycle);GO:0016020(membrane);GO:0017137(Rab GTPase binding);GO:0030139(endocytic vesicle);GO:0030306(ADP-ribosylation factor binding);GO:0030496(midbody);GO:0031410(cytoplasmic vesicle);GO:0032154(cleavage furrow);GO:0032456(endocytic recycling);GO:0032465(regulation of cytokinesis);GO:0042803(protein homodimerization activity);GO:0051301…	04144(Endocytosis)	K12485	NA
0	ENSDARG00000036966	hsd3b7	2.32536	1.47725	0.654543	0	0	hydroxy-delta-5-steroid dehydrogenase, 3 beta- and steroid delta-isomerase [Source:ZFIN;Acc:ZDB-GENE-030131-5673]	GO:0003854(3-beta-hydroxy-delta5-steroid dehydrogenase activity);GO:0005575(cellular_component);GO:0006694(steroid biosynthetic process);GO:0016491(oxidoreductase activity);GO:0016616(oxidoreductase activity, acting on the CH-OH group of donors, NAD or NADP as acceptor);GO:0055114(oxidation-reduction process)	00120(Primary bile acid biosynthesis)	K12408	EC:1.1.1.181
0	ENSDARG00000041505	itm2bb	5.87239	3.74806	0.647801	0	0	integral membrane protein 2Bb [Source:ZFIN;Acc:ZDB-GENE-040426-2139]	GO:0001540(amyloid-beta binding);GO:0005794(Golgi apparatus);GO:0005886(plasma membrane);GO:0016020(membrane);GO:0016021(integral component of membrane);GO:0042985(negative regulation of amyloid precursor protein biosynthetic process)	NA	K18264	NA
0	ENSDARG00000100742	reep5	6.16707	3.93969	0.646506	0	0	receptor accessory protein 5 [Source:ZFIN;Acc:ZDB-GENE-030131-9181]	GO:0016020(membrane);GO:0016021(integral component of membrane)	NA	K17279	NA
0	ENSDARG00000078249	unc13d	4.12422	2.64121	0.642924	0	0	unc-13 homolog D (C. elegans) [Source:ZFIN;Acc:ZDB-GENE-110411-188]	NA	NA	K19728	NA
0	ENSDARG00000054823	id3	5.10898	3.27334	0.642271	0	0	inhibitor of DNA binding 3 [Source:ZFIN;Acc:ZDB-GENE-020515-1]	GO:0001085(RNA polymerase II transcription factor binding);GO:0003700(DNA-binding transcription factor activity);GO:0005634(nucleus);GO:0005737(cytoplasm);GO:0007623(circadian rhythm);GO:0008134(transcription factor binding);GO:0030182(neuron differentiation);GO:0043392(negative regulation of DNA binding);GO:0045665(negative regulation of neuron differentiation);GO:0045892(negative regulation of …	04350(TGF-beta signaling pathway)	K17694	NA
0	ENSDARG00000055705	f5	1.28458	0.823127	0.64211	0	0	coagulation factor V [Source:ZFIN;Acc:ZDB-GENE-030131-5531]	GO:0005507(copper ion binding);GO:0009617(response to bacterium);GO:0046872(metal ion binding)	NA	NA	NA
0	ENSDARG00000027063	arpc1b	12.2701	7.86303	0.641991	0	0	actin related protein 2/3 complex, subunit 1B [Source:ZFIN;Acc:ZDB-GENE-030131-7414]	GO:0002574(thrombocyte differentiation);GO:0003779(actin binding);GO:0005515(protein binding);GO:0005737(cytoplasm);GO:0005856(cytoskeleton);GO:0005885(Arp2/3 protein complex);GO:0015629(actin cytoskeleton);GO:0030217(T cell differentiation);GO:0030833(regulation of actin filament polymerization);GO:0034314(Arp2/3 complex-mediated actin nucleation);GO:0051015(actin filament binding)	04144(Endocytosis);04810(Regulation of actin cytoskeleton);05132(Salmonella infection)	K05757	NA
0	ENSDARG00000052656	si:ch211-193e13.5	1.17111	0.751837	0.639385	0	0	si:ch211-193e13.5 [Source:ZFIN;Acc:ZDB-GENE-081104-158]	GO:0016020(membrane);GO:0016021(integral component of membrane)	NA	NA	NA
0	ENSDARG00000101482	hk2	2.48848	1.60039	0.636841	0	0	hexokinase 2 [Source:ZFIN;Acc:ZDB-GENE-040426-2017]	GO:0000166(nucleotide binding);GO:0001678(cellular glucose homeostasis);GO:0004340(glucokinase activity);GO:0004396(hexokinase activity);GO:0005524(ATP binding);GO:0005536(glucose binding);GO:0005829(cytosol);GO:0005975(carbohydrate metabolic process);GO:0006096(glycolytic process);GO:0008865(fructokinase activity);GO:0016301(kinase activity);GO:0016310(phosphorylation);GO:0016740(transferase act…	00010(Glycolysis / Gluconeogenesis);00051(Fructose and mannose metabolism);00052(Galactose metabolism);00500(Starch and sucrose metabolism);00520(Amino sugar and nucleotide sugar metabolism);00524(Neomycin, kanamycin and gentamicin biosynthesis);04910(Insulin signaling pathway)	K00844	EC:2.7.1.1
0	ENSDARG00000100383	il10ra	3.17324	2.04241	0.635686	0	0	interleukin 10 receptor, alpha [Source:ZFIN;Acc:ZDB-GENE-070905-4]	GO:0004896(cytokine receptor activity);GO:0005515(protein binding);GO:0005886(plasma membrane);GO:0016020(membrane);GO:0016021(integral component of membrane);GO:0019221(cytokine-mediated signaling pathway)	NA	NA	NA
0	ENSDARG00000013161	zgc:55558	1.62512	1.04602	0.635639	0	0	zgc:55558 [Source:ZFIN;Acc:ZDB-GENE-040426-740]	GO:0000166(nucleotide binding);GO:0003924(GTPase activity);GO:0005525(GTP binding);GO:0007165(signal transduction);GO:0016020(membrane)	04010(MAPK signaling pathway);04012(ErbB signaling pathway);04068(FoxO signaling pathway);04137(Mitophagy - animal);04140(Autophagy - animal);04150(mTOR signaling pathway);04210(Apoptosis);04218(Cellular senescence);04370(VEGF signaling pathway);04371(Apelin signaling pathway);04540(Gap junction);04625(C-type lectin receptor signaling pathway);04810(Regulation of actin cytoskeleton);04910(Insulin…	K07827	NA
0	ENSDARG00000004311	ldlrap1a	1.3979	0.900315	0.634763	0	0	low density lipoprotein receptor adaptor protein 1a [Source:ZFIN;Acc:ZDB-GENE-030328-13]	GO:0005515(protein binding);GO:0005575(cellular_component)	04144(Endocytosis)	K12474	NA
0	ENSDARG00000026611	socs3b	1.92239	1.23836	0.634465	0	0	suppressor of cytokine signaling 3b [Source:ZFIN;Acc:ZDB-GENE-040426-2528]	GO:0007259(receptor signaling pathway via JAK-STAT);GO:0016567(protein ubiquitination);GO:0035556(intracellular signal transduction);GO:0043066(negative regulation of apoptotic process)	04120(Ubiquitin mediated proteolysis);04910(Insulin signaling pathway);04920(Adipocytokine signaling pathway);05168(Herpes simplex virus 1 infection)	K04696	NA
0	ENSDARG00000105744	ptprr	2.83953	1.82994	0.633861	0	0	protein tyrosine phosphatase, receptor type, r [Source:ZFIN;Acc:ZDB-GENE-101029-2]	GO:0004721(phosphoprotein phosphatase activity);GO:0004725(protein tyrosine phosphatase activity);GO:0006470(protein dephosphorylation);GO:0016311(dephosphorylation);GO:0016787(hydrolase activity);GO:0016791(phosphatase activity);GO:0035335(peptidyl-tyrosine dephosphorylation)	04010(MAPK signaling pathway)	K04458	EC:3.1.3.48
0	ENSDARG00000030012	lrrfip1a	3.43904	2.21698	0.633411	0	0	leucine rich repeat (in FLII) interacting protein 1a [Source:ZFIN;Acc:ZDB-GENE-030131-99]	GO:0006355(regulation of transcription, DNA-templated)	NA	NA	NA
0	ENSDARG00000059001	pim2	5.98663	3.86411	0.631607	0	0	Pim-2 proto-oncogene, serine/threonine kinase [Source:ZFIN;Acc:ZDB-GENE-000831-6]	GO:0000166(nucleotide binding);GO:0004672(protein kinase activity);GO:0004674(protein serine/threonine kinase activity);GO:0005524(ATP binding);GO:0005737(cytoplasm);GO:0006468(protein phosphorylation);GO:0016301(kinase activity);GO:0016310(phosphorylation);GO:0016740(transferase activity);GO:0043066(negative regulation of apoptotic process)	04933(AGE-RAGE signaling pathway in diabetic complications)	K04702	EC:2.7.11.1
0	ENSDARG00000008155	sms	3.71251	2.39771	0.630739	0	0	spermine synthase [Source:ZFIN;Acc:ZDB-GENE-040625-150]	GO:0005575(cellular_component);GO:0006596(polyamine biosynthetic process);GO:0006597(spermine biosynthetic process);GO:0016740(transferase activity);GO:0016768(spermine synthase activity)	00270(Cysteine and methionine metabolism);00330(Arginine and proline metabolism);00410(beta-Alanine metabolism);00480(Glutathione metabolism)	K00802	EC:2.5.1.22
0	ENSDARG00000036818	hyal3	1.27513	0.826596	0.625388	0	0	hyaluronidase 3 [Source:ZFIN;Acc:ZDB-GENE-081104-366]	GO:0003824(catalytic activity);GO:0004415(hyalurononglucosaminidase activity);GO:0005975(carbohydrate metabolic process);GO:0008152(metabolic process);GO:0016787(hydrolase activity);GO:0016798(hydrolase activity, acting on glycosyl bonds);GO:0030214(hyaluronan catabolic process)	00531(Glycosaminoglycan degradation)	K01197	EC:3.2.1.35
0	ENSDARG00000004647	spice1	1.25843	0.816641	0.623855	0	0	spindle and centriole associated protein 1 [Source:ZFIN;Acc:ZDB-GENE-041212-64]	GO:0003674(molecular_function);GO:0005814(centriole);GO:0005819(spindle);GO:0046599(regulation of centriole replication);GO:0051310(metaphase plate congression);GO:0090307(mitotic spindle assembly)	NA	K16490	NA
0	ENSDARG00000057787	itgae.2	1.76259	1.14476	0.622646	0	0	integrin, alpha E, tandem duplicate 2 [Source:ZFIN;Acc:ZDB-GENE-130530-671]	GO:0007155(cell adhesion);GO:0007229(integrin-mediated signaling pathway);GO:0008305(integrin complex);GO:0016020(membrane);GO:0016021(integral component of membrane)	04810(Regulation of actin cytoskeleton)	K06524	NA
0	ENSDARG00000057708	zgc:175264	1.5805	1.0277	0.620962	0	0	zgc:175264 [Source:ZFIN;Acc:ZDB-GENE-080204-123]	GO:0003674(molecular_function);GO:0008150(biological_process);GO:0016020(membrane);GO:0016021(integral component of membrane)	NA	NA	NA
0	ENSDARG00000053005	cd22	1.24859	0.811977	0.620789	0	0	cd22 molecule [Source:ZFIN;Acc:ZDB-GENE-050522-521]	GO:0003674(molecular_function);GO:0016020(membrane);GO:0016021(integral component of membrane)	NA	NA	NA
0	ENSDARG00000038576	ube2d1b	2.89316	1.88934	0.614762	0	0	ubiquitin-conjugating enzyme E2D 1b [Source:ZFIN;Acc:ZDB-GENE-030131-2735]	GO:0000151(ubiquitin ligase complex);GO:0000166(nucleotide binding);GO:0000209(protein polyubiquitination);GO:0005524(ATP binding);GO:0006511(ubiquitin-dependent protein catabolic process);GO:0016740(transferase activity);GO:0031398(positive regulation of protein ubiquitination);GO:0031625(ubiquitin protein ligase binding);GO:0061631(ubiquitin conjugating enzyme activity)	04120(Ubiquitin mediated proteolysis);04141(Protein processing in endoplasmic reticulum)	K06689	EC:2.3.2.23
0	ENSDARG00000023188	lcp1	9.21519	6.03065	0.611699	0	0	lymphocyte cytosolic protein 1 (L-plastin) [Source:ZFIN;Acc:ZDB-GENE-991213-5]	GO:0003779(actin binding);GO:0005509(calcium ion binding);GO:0005515(protein binding);GO:0051015(actin filament binding);GO:0051017(actin filament bundle assembly)	NA	K17276	NA
0	ENSDARG00000074656	ctss2.1	8.60815	5.64534	0.608643	0	0	cathepsin S, ortholog2, tandem duplicate 1 [Source:ZFIN;Acc:ZDB-GENE-050522-559]	GO:0004197(cysteine-type endopeptidase activity);GO:0005615(extracellular space);GO:0005764(lysosome);GO:0006508(proteolysis);GO:0008233(peptidase activity);GO:0008234(cysteine-type peptidase activity);GO:0016787(hydrolase activity);GO:0051603(proteolysis involved in cellular protein catabolic process)	04142(Lysosome);04145(Phagosome);04210(Apoptosis)	K01368	EC:3.4.22.27
0	ENSDARG00000034187	calm1b	4.21961	2.77407	0.605109	0	0	calmodulin 1b [Source:ZFIN;Acc:ZDB-GENE-030804-2]	GO:0005509(calcium ion binding);GO:0019722(calcium-mediated signaling);GO:0046872(metal ion binding)	04020(Calcium signaling pathway);04070(Phosphatidylinositol signaling system);04114(Oocyte meiosis);04218(Cellular senescence);04261(Adrenergic signaling in cardiomyocytes);04270(Vascular smooth muscle contraction);04371(Apelin signaling pathway);04625(C-type lectin receptor signaling pathway);04744(Phototransduction);04910(Insulin signaling pathway);04912(GnRH signaling pathway);04916(Melanogene…	K02183	NA
0	ENSDARG00000058593	sri	5.53928	3.64174	0.605071	0	0	sorcin [Source:ZFIN;Acc:ZDB-GENE-040426-1356]	GO:0005509(calcium ion binding)	NA	NA	NA
0	ENSDARG00000058734	prdx1	5.25737	3.46274	0.602427	0	0	peroxiredoxin 1 [Source:ZFIN;Acc:ZDB-GENE-050320-35]	GO:0005829(cytosol);GO:0006979(response to oxidative stress);GO:0008379(thioredoxin peroxidase activity);GO:0016209(antioxidant activity);GO:0016491(oxidoreductase activity);GO:0019430(removal of superoxide radicals);GO:0032991(protein-containing complex);GO:0042744(hydrogen peroxide catabolic process);GO:0045321(leukocyte activation);GO:0045454(cell redox homeostasis);GO:0051920(peroxiredoxin ac…	04146(Peroxisome)	K13279	EC:1.11.1.15
0	ENSDARG00000079705	FP101887.1	2.83069	1.86613	0.601103	0	0	si:ch211-152p11.4 [Source:NCBI gene;Acc:555531]	GO:0005096(GTPase activator activity);GO:0008277(regulation of G protein-coupled receptor signaling pathway);GO:0043547(positive regulation of GTPase activity)	NA	K16449	NA
0	ENSDARG00000005162	tpm3	3.53321	2.33017	0.600545	0	0	tropomyosin 3 [Source:ZFIN;Acc:ZDB-GENE-030826-16]	GO:0005884(actin filament);GO:0007015(actin filament organization);GO:0014866(skeletal myofibril assembly);GO:0051015(actin filament binding)	04260(Cardiac muscle contraction);04261(Adrenergic signaling in cardiomyocytes)	K09290	NA
0		unm-sa1614	1.31714	0.86896	0.60005	0	0	NA	NA	NA	NA	NA
0	ENSDARG00000039034	marcksl1a	4.94494	3.26596	0.598447	0	0	MARCKS-like 1a [Source:ZFIN;Acc:ZDB-GENE-040426-2146]	GO:0003407(neural retina development);GO:0005516(calmodulin binding);GO:0005737(cytoplasm);GO:0005856(cytoskeleton);GO:0005886(plasma membrane);GO:0007417(central nervous system development);GO:0016020(membrane);GO:0051216(cartilage development)	NA	NA	NA
0	ENSDARG00000069290	bida	5.45405	3.60301	0.598124	0	0	BH3 interacting domain death agonist [Source:ZFIN;Acc:ZDB-GENE-050419-35]	GO:0005737(cytoplasm);GO:0042981(regulation of apoptotic process);GO:0043065(positive regulation of apoptotic process)	04115(p53 signaling pathway);04210(Apoptosis);04217(Necroptosis);05168(Herpes simplex virus 1 infection)	K04726	NA
0	ENSDARG00000076134	zgc:162972	1.07825	0.712437	0.597864	0	0	zgc:162972 [Source:ZFIN;Acc:ZDB-GENE-070424-49]	GO:0003676(nucleic acid binding);GO:0005634(nucleus)	NA	NA	NA
0	ENSDARG00000019302	mid1ip1b	3.77283	2.49327	0.597607	0	0	MID1 interacting protein 1b [Source:ZFIN;Acc:ZDB-GENE-040426-1720]	GO:0003674(molecular_function);GO:0005634(nucleus);GO:0005737(cytoplasm);GO:0005856(cytoskeleton);GO:0005874(microtubule);GO:0008150(biological_process)	NA	NA	NA
0	ENSDARG00000098312	scarb2a	2.88532	1.90854	0.596258	0	0	scavenger receptor class B, member 2a [Source:ZFIN;Acc:ZDB-GENE-020419-29]	GO:0005044(scavenger receptor activity);GO:0005764(lysosome);GO:0006898(receptor-mediated endocytosis);GO:0016020(membrane);GO:0016021(integral component of membrane);GO:0030903(notochord development)	04142(Lysosome)	K12384	NA
0	ENSDARG00000057867	lasp1	5.73824	3.80124	0.594138	0	0	LIM and SH3 protein 1 [Source:ZFIN;Acc:ZDB-GENE-030131-1936]	GO:0005515(protein binding);GO:0046872(metal ion binding)	NA	NA	NA
0	ENSDARG00000000568	ell	2.73525	1.81279	0.593463	0	0	elongation factor RNA polymerase II [Source:ZFIN;Acc:ZDB-GENE-030131-3946]	GO:0001570(vasculogenesis);GO:0003746(translation elongation factor activity);GO:0006366(transcription by RNA polymerase II);GO:0006368(transcription elongation from RNA polymerase II promoter);GO:0006414(translational elongation);GO:0008023(transcription elongation factor complex);GO:0042795(snRNA transcription by RNA polymerase II)	NA	K15183	NA
0	ENSDARG00000086762	gsdmea	1.72779	1.14661	0.591552	0	0	gasdermin Ea [Source:ZFIN;Acc:ZDB-GENE-120215-186]	NA	NA	NA	NA
0	ENSDARG00000052244	zgc:158564	3.31719	2.20227	0.590965	0	0	zgc:158564 [Source:ZFIN;Acc:ZDB-GENE-070112-1662]	GO:0003674(molecular_function);GO:0005575(cellular_component);GO:0008150(biological_process)	NA	NA	NA
0	ENSDARG00000053010	lpcat2	1.18437	0.787136	0.589437	0	0	lysophosphatidylcholine acyltransferase 2 [Source:ZFIN;Acc:ZDB-GENE-050522-229]	GO:0005509(calcium ion binding);GO:0016020(membrane);GO:0016021(integral component of membrane);GO:0016746(transferase activity, transferring acyl groups)	00564(Glycerophospholipid metabolism);00565(Ether lipid metabolism)	K13510	2.3.1.67;EC:2.3.1.23
0	ENSDARG00000011665	aldoaa	7.2973	4.85258	0.588611	0	0	aldolase a, fructose-bisphosphate, a [Source:ZFIN;Acc:ZDB-GENE-030131-8369]	GO:0001756(somitogenesis);GO:0001966(thigmotaxis);GO:0003824(catalytic activity);GO:0004332(fructose-bisphosphate aldolase activity);GO:0006096(glycolytic process);GO:0007409(axonogenesis);GO:0007420(brain development);GO:0016829(lyase activity);GO:0043473(pigmentation)	00010(Glycolysis / Gluconeogenesis);00030(Pentose phosphate pathway);00051(Fructose and mannose metabolism)	K01623	EC:4.1.2.13
0	ENSDARG00000009079	BX296551.1	1.05672	0.702877	0.588246	0	0	sodium-dependent lysophosphatidylcholine symporter 1-like [Source:NCBI gene;Acc:570014]	NA	NA	NA	NA
0	ENSDARG00000111698	tnfsf18	1.40027	0.933638	0.584774	0	0	TNF superfamily member 18 [Source:ZFIN;Acc:ZDB-GENE-101109-1]	GO:0005164(tumor necrosis factor receptor binding);GO:0005515(protein binding);GO:0006955(immune response);GO:0016020(membrane);GO:0016021(integral component of membrane);GO:0042531(positive regulation of tyrosine phosphorylation of STAT protein);GO:0055113(epiboly involved in gastrulation with mouth forming second)	NA	NA	NA
0	ENSDARG00000104068	gstp1	3.65359	2.43828	0.583448	0	0	glutathione S-transferase pi 1 [Source:ZFIN;Acc:ZDB-GENE-020806-4]	GO:0004364(glutathione transferase activity);GO:0005515(protein binding);GO:0016740(transferase activity);GO:0071466(cellular response to xenobiotic stimulus)	00480(Glutathione metabolism);00980(Metabolism of xenobiotics by cytochrome P450);00982(Drug metabolism - cytochrome P450);00983(Drug metabolism - other enzymes)	NA	NA
0	ENSDARG00000004034	arhgdig	11.4153	7.63056	0.581113	0	0	Rho GDP dissociation inhibitor (GDI) gamma [Source:ZFIN;Acc:ZDB-GENE-040426-1493]	GO:0005094(Rho GDP-dissociation inhibitor activity);GO:0005737(cytoplasm);GO:0005829(cytosol);GO:0007266(Rho protein signal transduction);GO:0016020(membrane);GO:0048365(Rac GTPase binding);GO:0050790(regulation of catalytic activity)	NA	K12462	NA
0	ENSDARG00000102599	si:ch1073-392o20.2	2.67802	1.79076	0.580589	0	0	si:ch1073-392o20.2 [Source:ZFIN;Acc:ZDB-GENE-091204-431]	GO:0005768(endosome);GO:0005802(trans-Golgi network);GO:0016020(membrane);GO:0016021(integral component of membrane);GO:0030140(trans-Golgi network transport vesicle)	NA	NA	NA
0	ENSDARG00000010752	acsl4b	1.99249	1.33272	0.580197	0	0	acyl-CoA synthetase long chain family member 4b [Source:ZFIN;Acc:ZDB-GENE-030131-6493]	GO:0000398(mRNA splicing, via spliceosome);GO:0003824(catalytic activity);GO:0005681(spliceosomal complex)	00061(Fatty acid biosynthesis);00071(Fatty acid degradation);03320(PPAR signaling pathway);04146(Peroxisome);04216(Ferroptosis);04920(Adipocytokine signaling pathway)	K01897	EC:6.2.1.3
0	ENSDARG00000030914	tmem120a	1.4714	0.9843	0.580017	0	0	transmembrane protein 120A [Source:ZFIN;Acc:ZDB-GENE-070424-21]	GO:0003674(molecular_function);GO:0005634(nucleus);GO:0005637(nuclear inner membrane);GO:0016020(membrane);GO:0016021(integral component of membrane);GO:0045444(fat cell differentiation)	NA	NA	NA
0	ENSDARG00000056075	rca2.1	2.16336	1.44745	0.579765	0	0	regulator of complement activation group 2 gene 1 [Source:ZFIN;Acc:ZDB-GENE-050320-60]	GO:0016020(membrane);GO:0016021(integral component of membrane)	NA	NA	NA
0	ENSDARG00000068233	zgc:64051	6.33102	4.23802	0.579047	0	0	zgc:64051 [Source:ZFIN;Acc:ZDB-GENE-040426-1349]	GO:0003674(molecular_function);GO:0005887(integral component of plasma membrane);GO:0007166(cell surface receptor signaling pathway);GO:0016020(membrane);GO:0016021(integral component of membrane)	NA	K06489	NA
0	ENSDARG00000002745	tdh	4.79206	3.20998	0.578084	0	0	L-threonine dehydrogenase [Source:ZFIN;Acc:ZDB-GENE-040426-2379]	GO:0003824(catalytic activity);GO:0050662(coenzyme binding)	00260(Glycine, serine and threonine metabolism)	K15789	EC:1.1.1.103
0	ENSDARG00000058230	rps6kb1b	1.58149	1.06613	0.5689	0	0	ribosomal protein S6 kinase b, polypeptide 1b [Source:ZFIN;Acc:ZDB-GENE-040426-2038]	GO:0000166(nucleotide binding);GO:0004672(protein kinase activity);GO:0004674(protein serine/threonine kinase activity);GO:0004711(ribosomal protein S6 kinase activity);GO:0005524(ATP binding);GO:0005634(nucleus);GO:0005737(cytoplasm);GO:0006468(protein phosphorylation);GO:0007165(signal transduction);GO:0016301(kinase activity);GO:0016310(phosphorylation);GO:0016740(transferase activity);GO:0035…	04012(ErbB signaling pathway);04140(Autophagy - animal);04150(mTOR signaling pathway);04350(TGF-beta signaling pathway);04371(Apelin signaling pathway);04910(Insulin signaling pathway)	K04688	EC:2.7.11.1
0	ENSDARG00000002021	pygb	1.13636	0.766336	0.568369	0	0	phosphorylase, glycogen; brain [Source:ZFIN;Acc:ZDB-GENE-040928-2]	GO:0004645(phosphorylase activity);GO:0005737(cytoplasm);GO:0005975(carbohydrate metabolic process);GO:0005980(glycogen catabolic process);GO:0008184(glycogen phosphorylase activity);GO:0016740(transferase activity);GO:0016757(transferase activity, transferring glycosyl groups);GO:0030170(pyridoxal phosphate binding);GO:0102250(linear malto-oligosaccharide phosphorylase activity);GO:0102499(SHG a…	00500(Starch and sucrose metabolism);04217(Necroptosis);04910(Insulin signaling pathway)	K00688	EC:2.4.1.1
0	ENSDARG00000000906	skap2	2.68396	1.81056	0.567931	0	0	src kinase associated phosphoprotein 2 [Source:ZFIN;Acc:ZDB-GENE-030616-438]	GO:0005515(protein binding);GO:0005737(cytoplasm);GO:0005886(plasma membrane);GO:0042113(B cell activation)	NA	NA	NA
0	ENSDARG00000077103	sema4aa	1.08621	0.732854	0.567704	0	0	sema domain, immunoglobulin domain (Ig), transmembrane domain (TM) and short cytoplasmic domain, (semaphorin) 4Aa [Source:ZFIN;Acc:ZDB-GENE-110411-86]	GO:0001755(neural crest cell migration);GO:0005515(protein binding);GO:0005615(extracellular space);GO:0005887(integral component of plasma membrane);GO:0010842(retina layer formation);GO:0016020(membrane);GO:0016021(integral component of membrane);GO:0030215(semaphorin receptor binding);GO:0030335(positive regulation of cell migration);GO:0038191(neuropilin binding);GO:0045499(chemorepellent act…	NA	NA	NA
0	ENSDARG00000102056	svild	1.10592	0.746375	0.567274	0	0	supervillin d [Source:ZFIN;Acc:ZDB-GENE-081104-483]	GO:0003779(actin binding);GO:0007010(cytoskeleton organization);GO:0051015(actin filament binding)	NA	NA	NA
0	ENSDARG00000068214	ccni	9.9887	6.75125	0.565143	0	0	cyclin I [Source:ZFIN;Acc:ZDB-GENE-040426-2898]	GO:0000079(regulation of cyclin-dependent protein serine/threonine kinase activity);GO:0000278(mitotic cell cycle);GO:0000307(cyclin-dependent protein kinase holoenzyme complex);GO:0003674(molecular_function);GO:0004672(protein kinase activity);GO:0005575(cellular_component);GO:0005634(nucleus);GO:0005737(cytoplasm);GO:0006468(protein phosphorylation);GO:0007088(regulation of mitotic nuclear divi…	NA	NA	NA
0	ENSDARG00000070822	cnp	3.09767	2.09536	0.563984	0	0	2',3'-cyclic nucleotide 3' phosphodiesterase [Source:ZFIN;Acc:ZDB-GENE-030521-29]	GO:0004113(2',3'-cyclic-nucleotide 3'-phosphodiesterase activity);GO:0005737(cytoplasm);GO:0005829(cytosol);GO:0009214(cyclic nucleotide catabolic process);GO:0016020(membrane);GO:0031103(axon regeneration)	NA	K01121	EC:3.1.4.37
0	ENSDARG00000102908	il16	1.6458	1.11418	0.562809	0	0	interleukin 16 [Source:ZFIN;Acc:ZDB-GENE-130103-3]	GO:0005515(protein binding)	04060(Cytokine-cytokine receptor interaction)	K22628	NA
0	ENSDARG00000100515	dusp1	5.04179	3.42615	0.557349	0	0	dual specificity phosphatase 1 [Source:ZFIN;Acc:ZDB-GENE-040426-2018]	GO:0000188(inactivation of MAPK activity);GO:0004721(phosphoprotein phosphatase activity);GO:0004725(protein tyrosine phosphatase activity);GO:0005634(nucleus);GO:0005737(cytoplasm);GO:0006470(protein dephosphorylation);GO:0008138(protein tyrosine/serine/threonine phosphatase activity);GO:0016311(dephosphorylation);GO:0016787(hydrolase activity);GO:0016791(phosphatase activity);GO:0017017(MAP kin…	04010(MAPK signaling pathway)	K21278	3.1.3.48;EC:3.1.3.16
0	ENSDARG00000006266	stat1a	7.8639	5.34933	0.555887	0	0	signal transducer and activator of transcription 1a [Source:ZFIN;Acc:ZDB-GENE-980526-499]	GO:0003677(DNA binding);GO:0003700(DNA-binding transcription factor activity);GO:0005634(nucleus);GO:0005737(cytoplasm);GO:0006355(regulation of transcription, DNA-templated);GO:0007165(signal transduction)	04217(Necroptosis);04620(Toll-like receptor signaling pathway);04621(NOD-like receptor signaling pathway);04625(C-type lectin receptor signaling pathway);04933(AGE-RAGE signaling pathway in diabetic complications);05168(Herpes simplex virus 1 infection)	K11220	NA
0	ENSDARG00000013360	sh3gl3a	2.17848	1.48494	0.552916	0	0	SH3-domain GRB2-like 3a [Source:ZFIN;Acc:ZDB-GENE-070112-242]	GO:0005515(protein binding);GO:0005737(cytoplasm);GO:0006897(endocytosis)	04144(Endocytosis)	K11247	NA
0	ENSDARG00000077499	plekho1b	2.16598	1.47766	0.551708	0	0	pleckstrin homology domain containing, family O member 1b [Source:ZFIN;Acc:ZDB-GENE-100609-2]	GO:1901739(regulation of myoblast fusion)	NA	NA	NA
0	ENSDARG00000052429	syngr2a	1.786	1.21899	0.551049	0	0	synaptogyrin 2a [Source:ZFIN;Acc:ZDB-GENE-070112-1292]	GO:0003674(molecular_function);GO:0008150(biological_process);GO:0016020(membrane);GO:0016021(integral component of membrane);GO:0030672(synaptic vesicle membrane);GO:0031594(neuromuscular junction)	NA	NA	NA
0	ENSDARG00000055365	si:dkey-25e12.3	5.14704	3.51882	0.54865	0	0	si:dkey-25e12.3 [Source:ZFIN;Acc:ZDB-GENE-041001-132]	GO:0000166(nucleotide binding);GO:0003824(catalytic activity);GO:0005634(nucleus);GO:0005737(cytoplasm);GO:0016787(hydrolase activity)	NA	NA	NA
0	ENSDARG00000091555	ostf1	1.90742	1.30601	0.546462	0	0	osteoclast stimulating factor 1 [Source:ZFIN;Acc:ZDB-GENE-040625-157]	GO:0005515(protein binding);GO:0005737(cytoplasm)	NA	NA	NA
0	ENSDARG00000090730	cfbl	2.30962	1.58932	0.539244	0	0	complement factor b, like [Source:ZFIN;Acc:ZDB-GENE-030131-2319]	GO:0004252(serine-type endopeptidase activity);GO:0005576(extracellular region);GO:0006508(proteolysis);GO:0006956(complement activation);GO:0009617(response to bacterium)	NA	K01335	EC:3.4.21.47
0	ENSDARG00000068978	glo1	3.77603	2.60259	0.536923	0	0	glyoxalase 1 [Source:ZFIN;Acc:ZDB-GENE-030722-9]	GO:0004462(lactoylglutathione lyase activity);GO:0016829(lyase activity);GO:0046872(metal ion binding)	00620(Pyruvate metabolism)	K01759	EC:4.4.1.5
0	ENSDARG00000024940	rnf144b	1.7717	1.22231	0.535525	0	0	ring finger protein 144B [Source:ZFIN;Acc:ZDB-GENE-040426-1292]	GO:0000151(ubiquitin ligase complex);GO:0000209(protein polyubiquitination);GO:0004842(ubiquitin-protein transferase activity);GO:0005737(cytoplasm);GO:0006511(ubiquitin-dependent protein catabolic process);GO:0016020(membrane);GO:0016021(integral component of membrane);GO:0016567(protein ubiquitination);GO:0016740(transferase activity);GO:0031624(ubiquitin conjugating enzyme binding);GO:0032436(…	NA	K11975	EC:2.3.2.31
0	ENSDARG00000039234	zgc:171579	0.95209	0.657519	0.534065	0	0	zgc:171579 [Source:ZFIN;Acc:ZDB-GENE-080204-32]	GO:0004930(G protein-coupled receptor activity);GO:0007165(signal transduction);GO:0007186(G protein-coupled receptor signaling pathway);GO:0016020(membrane);GO:0016021(integral component of membrane)	NA	NA	NA
0	ENSDARG00000090548	CR753886.1	1.23342	0.852371	0.533107	0	0	GTPase IMAP family member 4 [Source:NCBI gene;Acc:793765]	GO:0005525(GTP binding)	NA	NA	NA
0	ENSDARG00000027689	pold1	1.1841	0.819253	0.531411	0	0	polymerase (DNA directed), delta 1, catalytic subunit [Source:ZFIN;Acc:ZDB-GENE-060429-1]	GO:0000166(nucleotide binding);GO:0003676(nucleic acid binding);GO:0003677(DNA binding);GO:0003887(DNA-directed DNA polymerase activity);GO:0005634(nucleus);GO:0006260(DNA replication);GO:0006261(DNA-dependent DNA replication);GO:0006287(base-excision repair, gap-filling);GO:0006297(nucleotide-excision repair, DNA gap filling);GO:0008296(3'-5'-exodeoxyribonuclease activity);GO:0016740(transferase…	03030(DNA replication);03410(Base excision repair);03420(Nucleotide excision repair);03430(Mismatch repair);03440(Homologous recombination)	K02327	EC:2.7.7.7
0	ENSDARG00000008363	mcl1b	2.90574	2.01289	0.529638	0	0	MCL1, BCL2 family apoptosis regulator b [Source:ZFIN;Acc:ZDB-GENE-030825-1]	GO:0005741(mitochondrial outer membrane);GO:0007088(regulation of mitotic nuclear division);GO:0008630(intrinsic apoptotic signaling pathway in response to DNA damage);GO:0042803(protein homodimerization activity);GO:0042981(regulation of apoptotic process);GO:0043009(chordate embryonic development);GO:0043066(negative regulation of apoptotic process);GO:0043154(negative regulation of cysteine-ty…	NA	NA	NA
0	ENSDARG00000009782	myh11a	1.89632	1.31549	0.527598	0	0	myosin, heavy chain 11a, smooth muscle [Source:ZFIN;Acc:ZDB-GENE-050531-1]	GO:0000166(nucleotide binding);GO:0003774(motor activity);GO:0003779(actin binding);GO:0005515(protein binding);GO:0005524(ATP binding);GO:0008015(blood circulation);GO:0016459(myosin complex);GO:0030860(regulation of polarized epithelial cell differentiation);GO:0048546(digestive tract morphogenesis);GO:0048565(digestive tract development);GO:0051015(actin filament binding);GO:0060047(heart cont…	04530(Tight junction)	K10352	NA
0	ENSDARG00000039007	eno3	8.38978	5.82172	0.527188	0	0	enolase 3, (beta, muscle) [Source:ZFIN;Acc:ZDB-GENE-031006-5]	GO:0000015(phosphopyruvate hydratase complex);GO:0000287(magnesium ion binding);GO:0004634(phosphopyruvate hydratase activity);GO:0006096(glycolytic process)	00010(Glycolysis / Gluconeogenesis);03018(RNA degradation)	K01689	EC:4.2.1.11
0	ENSDARG00000075733	zyx	1.4135	0.981245	0.526584	0	0	zyxin [Source:ZFIN;Acc:ZDB-GENE-070928-18]	GO:0046872(metal ion binding)	04510(Focal adhesion)	K06273	NA
0	ENSDARG00000094012	si:dkey-192g7.3	2.74432	1.90532	0.526414	0	0	si:dkey-192g7.3 [Source:ZFIN;Acc:ZDB-GENE-070912-411]	GO:0005102(signaling receptor binding);GO:0009897(external side of plasma membrane);GO:0016020(membrane);GO:0016021(integral component of membrane);GO:0050776(regulation of immune response);GO:0050852(T cell receptor signaling pathway)	NA	NA	NA
0	ENSDARG00000002956	si:dkey-32n7.4	1.07085	0.743744	0.525884	0	0	si:dkey-32n7.4 [Source:ZFIN;Acc:ZDB-GENE-110411-175]	GO:0007155(cell adhesion);GO:0007229(integrin-mediated signaling pathway);GO:0008305(integrin complex);GO:0016020(membrane);GO:0016021(integral component of membrane)	04810(Regulation of actin cytoskeleton)	K06462	NA
0	ENSDARG00000089404	si:dkey-24p1.7	1.06425	0.739222	0.525758	0	0	si:dkey-24p1.7 [Source:ZFIN;Acc:ZDB-GENE-121214-215]	GO:0016020(membrane);GO:0016021(integral component of membrane)	NA	NA	NA
0	ENSDARG00000042927	mapre1a	5.05514	3.51754	0.523184	0	0	microtubule-associated protein, RP/EB family, member 1a [Source:ZFIN;Acc:ZDB-GENE-030131-6067]	GO:0005515(protein binding);GO:0005815(microtubule organizing center);GO:0005874(microtubule);GO:0005881(cytoplasmic microtubule);GO:0008017(microtubule binding);GO:0031110(regulation of microtubule polymerization or depolymerization);GO:0035371(microtubule plus-end);GO:0035372(protein localization to microtubule);GO:0051010(microtubule plus-end binding);GO:0051225(spindle assembly);GO:0051233(sp…	NA	K10436	NA
0	ENSDARG00000102482	zgc:165573	2.15197	1.49773	0.522884	0	0	zgc:165573 [Source:ZFIN;Acc:ZDB-GENE-070615-27]	GO:0003674(molecular_function);GO:0005886(plasma membrane);GO:0016020(membrane);GO:0016021(integral component of membrane)	NA	NA	NA
0	ENSDARG00000018111	kdm7aa	2.20019	1.53191	0.5223	0	0	lysine (K)-specific demethylase 7Aa [Source:ZFIN;Acc:ZDB-GENE-030131-9829]	GO:0005634(nucleus);GO:0006325(chromatin organization);GO:0007399(nervous system development);GO:0016491(oxidoreductase activity);GO:0016706(2-oxoglutarate-dependent dioxygenase activity);GO:0030901(midbrain development);GO:0032454(histone demethylase activity (H3-K9 specific));GO:0033169(histone H3-K9 demethylation);GO:0035574(histone H4-K20 demethylation);GO:0035575(histone demethylase activity…	NA	K11445	EC:1.14.11.-
0	ENSDARG00000116660	pigrl2.3.1	1.09034	0.759564	0.521535	0	0	polymeric immunoglobulin receptor-like 2.3 [Source:ZFIN;Acc:ZDB-GENE-150409-2]	NA	NA	NA	NA
0	ENSDARG00000005355	larp6a	1.44967	1.01021	0.521067	0	0	La ribonucleoprotein domain family, member 6a [Source:ZFIN;Acc:ZDB-GENE-030131-6403]	GO:0001756(somitogenesis);GO:0003676(nucleic acid binding);GO:0003723(RNA binding);GO:0005634(nucleus);GO:0006396(RNA processing);GO:0006417(regulation of translation);GO:1990904(ribonucleoprotein complex)	NA	K18733	NA
0	ENSDARG00000012987	gpia	2.71396	1.8926	0.520031	0	0	glucose-6-phosphate isomerase a [Source:ZFIN;Acc:ZDB-GENE-020513-2]	GO:0004347(glucose-6-phosphate isomerase activity);GO:0005829(cytosol);GO:0006094(gluconeogenesis);GO:0006096(glycolytic process);GO:0016853(isomerase activity);GO:0016866(intramolecular transferase activity);GO:0048029(monosaccharide binding);GO:0051156(glucose 6-phosphate metabolic process)	00010(Glycolysis / Gluconeogenesis);00030(Pentose phosphate pathway);00500(Starch and sucrose metabolism);00520(Amino sugar and nucleotide sugar metabolism)	K01810	EC:5.3.1.9
0	ENSDARG00000054063	arpc4	2.77601	1.93645	0.5196	0	0	actin related protein 2/3 complex, subunit 4 [Source:ZFIN;Acc:ZDB-GENE-010724-9]	GO:0003779(actin binding);GO:0005737(cytoplasm);GO:0005856(cytoskeleton);GO:0005885(Arp2/3 protein complex);GO:0015629(actin cytoskeleton);GO:0030041(actin filament polymerization);GO:0030833(regulation of actin filament polymerization);GO:0034314(Arp2/3 complex-mediated actin nucleation)	04144(Endocytosis);04810(Regulation of actin cytoskeleton);05132(Salmonella infection)	K05755	NA
0	ENSDARG00000071203	sptssa	1.66317	1.16153	0.517915	0	0	serine palmitoyltransferase, small subunit A [Source:ZFIN;Acc:ZDB-GENE-050320-26]	GO:0004758(serine C-palmitoyltransferase activity);GO:0005783(endoplasmic reticulum);GO:0005789(endoplasmic reticulum membrane);GO:0006629(lipid metabolic process);GO:0006665(sphingolipid metabolic process);GO:0016020(membrane);GO:0016021(integral component of membrane);GO:0017059(serine C-palmitoyltransferase complex)	NA	NA	NA
0	ENSDARG00000054610	coro1a	8.72543	6.0954	0.517506	0	0	coronin, actin binding protein, 1A [Source:ZFIN;Acc:ZDB-GENE-030131-9512]	GO:0001654(eye development);GO:0005515(protein binding);GO:0007420(brain development);GO:0021952(central nervous system projection neuron axonogenesis)	04145(Phagosome)	K13882	NA
0	ENSDARG00000054578	arl6ip1	4.71548	3.29588	0.516741	0	0	ADP-ribosylation factor-like 6 interacting protein 1 [Source:ZFIN;Acc:ZDB-GENE-040426-1087]	GO:0001755(neural crest cell migration);GO:0005515(protein binding);GO:0005784(Sec61 translocon complex);GO:0006613(cotranslational protein targeting to membrane);GO:0014032(neural crest cell development);GO:0016020(membrane);GO:0016021(integral component of membrane);GO:0060042(retina morphogenesis in camera-type eye)	NA	NA	NA
0	ENSDARG00000058302	sh3bgrl	3.02425	2.11444	0.516304	0	0	SH3 domain binding glutamate-rich protein like [Source:ZFIN;Acc:ZDB-GENE-040426-1376]	GO:0003674(molecular_function);GO:0008150(biological_process)	NA	NA	NA
0	ENSDARG00000002365	cers5	1.22072	0.854305	0.514908	0	0	ceramide synthase 5 [Source:ZFIN;Acc:ZDB-GENE-030131-1740]	GO:0003677(DNA binding);GO:0005634(nucleus);GO:0005783(endoplasmic reticulum);GO:0016020(membrane);GO:0016021(integral component of membrane);GO:0046513(ceramide biosynthetic process);GO:0050291(sphingosine N-acyltransferase activity)	00600(Sphingolipid metabolism)	K04710	EC:2.3.1.24
0	ENSDARG00000056090	capza1b	3.89266	2.72619	0.513869	0	0	capping actin protein of muscle Z-line subunit alpha 1b [Source:ZFIN;Acc:ZDB-GENE-031002-24]	GO:0003779(actin binding);GO:0008290(F-actin capping protein complex);GO:0030036(actin cytoskeleton organization);GO:0030479(actin cortical patch);GO:0051015(actin filament binding);GO:0051016(barbed-end actin filament capping);GO:0051693(actin filament capping)	04144(Endocytosis)	K10364	NA
0	ENSDARG00000009313	napsa	2.38267	1.67012	0.51263	0	0	napsin A aspartic peptidase [Source:ZFIN;Acc:ZDB-GENE-030131-8690]	GO:0004190(aspartic-type endopeptidase activity);GO:0005764(lysosome);GO:0006508(proteolysis);GO:0008233(peptidase activity);GO:0016787(hydrolase activity);GO:0030163(protein catabolic process);GO:0033619(membrane protein proteolysis)	04140(Autophagy - animal);04142(Lysosome);04210(Apoptosis)	K01379	EC:3.4.23.5
0	ENSDARG00000100835	RGS13 (1 of many)	1.01482	0.712733	0.509795	0	0	si:ch211-117l17.5 [Source:ZFIN;Acc:ZDB-GENE-110914-230]	NA	NA	K16449	NA
0	ENSDARG00000058731	slc2a6	3.37189	2.36987	0.508749	0	0	solute carrier family 2 (facilitated glucose transporter), member 6 [Source:ZFIN;Acc:ZDB-GENE-081104-301]	GO:0005215(transporter activity);GO:0005351(carbohydrate:proton symporter activity);GO:0005887(integral component of plasma membrane);GO:0016020(membrane);GO:0016021(integral component of membrane);GO:0022857(transmembrane transporter activity);GO:0034219(carbohydrate transmembrane transport);GO:0055056(D-glucose transmembrane transporter activity);GO:0055085(transmembrane transport);GO:1902600(p…	NA	K08144	NA
0	ENSDARG00000015278	plxnc1	1.38091	0.971219	0.507748	0	0	plexin C1 [Source:ZFIN;Acc:ZDB-GENE-030131-1620]	GO:0002116(semaphorin receptor complex);GO:0005515(protein binding);GO:0005887(integral component of plasma membrane);GO:0007162(negative regulation of cell adhesion);GO:0007165(signal transduction);GO:0008360(regulation of cell shape);GO:0016020(membrane);GO:0016021(integral component of membrane);GO:0017154(semaphorin receptor activity);GO:0030334(regulation of cell migration);GO:0043087(regula…	NA	K06572	NA
0	ENSDARG00000062519	abcc13	1.73354	1.21946	0.507483	0	0	ATP-binding cassette, sub-family C (CFTR/MRP), member 13 [Source:ZFIN;Acc:ZDB-GENE-050517-26]	GO:0000166(nucleotide binding);GO:0005524(ATP binding);GO:0016020(membrane);GO:0016021(integral component of membrane);GO:0016887(ATPase activity);GO:0042626(ATPase activity, coupled to transmembrane movement of substances);GO:0055085(transmembrane transport)	NA	NA	NA
0	ENSDARG00000053131	irak3	2.50432	1.76388	0.50566	0	0	interleukin-1 receptor-associated kinase 3 [Source:ZFIN;Acc:ZDB-GENE-060503-710]	GO:0002755(MyD88-dependent toll-like receptor signaling pathway);GO:0004672(protein kinase activity);GO:0004674(protein serine/threonine kinase activity);GO:0005515(protein binding);GO:0005524(ATP binding);GO:0005634(nucleus);GO:0005737(cytoplasm);GO:0005886(plasma membrane);GO:0006468(protein phosphorylation);GO:0007165(signal transduction);GO:0016020(membrane);GO:0016021(integral component of m…	NA	K04732	EC:2.7.11.1
0	ENSDARG00000054304	homeza	1.0791	0.760802	0.50424	0	0	homeobox and leucine zipper encoding a [Source:ZFIN;Acc:ZDB-GENE-030616-592]	GO:0000122(negative regulation of transcription by RNA polymerase II);GO:0003677(DNA binding);GO:0003700(DNA-binding transcription factor activity);GO:0003714(transcription corepressor activity);GO:0005634(nucleus)	NA	NA	NA
0	ENSDARG00000045224	glipr1a	1.21182	0.855511	0.502312	0	0	GLI pathogenesis-related 1a [Source:ZFIN;Acc:ZDB-GENE-110309-2]	GO:0005576(extracellular region);GO:0005615(extracellular space);GO:0016020(membrane);GO:0016021(integral component of membrane)	NA	NA	NA
0	ENSDARG00000074319	sall1a	0.993301	0.701729	0.501319	0	0	spalt-like transcription factor 1a [Source:ZFIN;Acc:ZDB-GENE-020228-2]	GO:0003676(nucleic acid binding);GO:0005634(nucleus);GO:0006355(regulation of transcription, DNA-templated);GO:0035118(embryonic pectoral fin morphogenesis);GO:0045743(positive regulation of fibroblast growth factor receptor signaling pathway)	NA	K19871	NA
0	ENSDARG00000029036	rab32a	2.69456	1.90471	0.500478	0	0	RAB32a, member RAS oncogene family [Source:ZFIN;Acc:ZDB-GENE-031006-10]	GO:0003924(GTPase activity);GO:0005525(GTP binding);GO:0005739(mitochondrion);GO:0005794(Golgi apparatus);GO:0005802(trans-Golgi network);GO:0006886(intracellular protein transport);GO:0016192(vesicle-mediated transport);GO:0031982(vesicle);GO:0032482(Rab protein signal transduction);GO:0042470(melanosome);GO:0060036(notochord cell vacuolation)	NA	K07918	NA
0	ENSDARG00000045528	fgd6	1.08118	0.76451	0.499993	0	0	FYVE, RhoGEF and PH domain containing 6 [Source:ZFIN;Acc:ZDB-GENE-041210-200]	GO:0005085(guanyl-nucleotide exchange factor activity);GO:0005089(Rho guanyl-nucleotide exchange factor activity);GO:0035023(regulation of Rho protein signal transduction);GO:0043087(regulation of GTPase activity);GO:0046872(metal ion binding)	NA	K05724	NA
0	ENSDARG00000098946	pald1a	1.31477	0.930141	0.499294	0	0	phosphatase domain containing paladin 1a [Source:ZFIN;Acc:ZDB-GENE-030804-26]	GO:0016020(membrane);GO:0016021(integral component of membrane)	NA	NA	NA
0	ENSDARG00000098680	si:zfos-2326c3.2	1.57438	1.11453	0.498342	0	0	si:zfos-2326c3.2 [Source:ZFIN;Acc:ZDB-GENE-091113-25]	GO:0000165(MAPK cascade);GO:0004672(protein kinase activity);GO:0004674(protein serine/threonine kinase activity);GO:0005524(ATP binding);GO:0005737(cytoplasm);GO:0006468(protein phosphorylation);GO:0023014(signal transduction by protein phosphorylation);GO:0031098(stress-activated protein kinase signaling cascade);GO:0032147(activation of protein kinase activity);GO:0048812(neuron projection mor…	04010(MAPK signaling pathway)	K04407	EC:2.7.11.1
0	ENSDARG00000076189	ccdc88b	2.57561	1.82394	0.497859	0	0	coiled-coil domain containing 88B [Source:ZFIN;Acc:ZDB-GENE-080303-31]	GO:0005737(cytoplasm);GO:0005813(centrosome);GO:0008017(microtubule binding);GO:0030705(cytoskeleton-dependent intracellular transport);GO:0031122(cytoplasmic microtubule organization);GO:0051959(dynein light intermediate chain binding)	NA	NA	NA
0	ENSDARG00000076090	jakmip1	0.946052	0.670763	0.496116	0	0	janus kinase and microtubule interacting protein 1 [Source:ZFIN;Acc:ZDB-GENE-110208-7]	GO:0008017(microtubule binding);GO:0016020(membrane);GO:0016021(integral component of membrane);GO:0019900(kinase binding)	NA	NA	NA
0	ENSDARG00000018411	mknk1	1.44107	1.02201	0.495735	0	0	MAP kinase interacting serine/threonine kinase 1 [Source:ZFIN;Acc:ZDB-GENE-080220-11]	GO:0000166(nucleotide binding);GO:0004672(protein kinase activity);GO:0004674(protein serine/threonine kinase activity);GO:0004683(calmodulin-dependent protein kinase activity);GO:0005516(calmodulin binding);GO:0005524(ATP binding);GO:0005634(nucleus);GO:0005737(cytoplasm);GO:0006468(protein phosphorylation);GO:0009931(calcium-dependent protein serine/threonine kinase activity);GO:0018105(peptidy…	04010(MAPK signaling pathway);04910(Insulin signaling pathway)	K04372	EC:2.7.11.1
0	ENSDARG00000032868	pde4ba	8.27353	5.86917	0.495348	0	0	phosphodiesterase 4B, cAMP-specific a [Source:ZFIN;Acc:ZDB-GENE-030131-9570]	GO:0004114(3',5'-cyclic-nucleotide phosphodiesterase activity);GO:0004115(3',5'-cyclic-AMP phosphodiesterase activity);GO:0005515(protein binding);GO:0005829(cytosol);GO:0007165(signal transduction);GO:0008081(phosphoric diester hydrolase activity);GO:0016787(hydrolase activity);GO:0030552(cAMP binding);GO:0044325(ion channel binding);GO:0046872(metal ion binding)	00230(Purine metabolism)	K13293	EC:3.1.4.53
0	ENSDARG00000012513	sdcbp2	9.44272	6.70133	0.494755	0	0	syndecan binding protein (syntenin) 2 [Source:ZFIN;Acc:ZDB-GENE-030131-3727]	GO:0001666(response to hypoxia);GO:0005515(protein binding);GO:0005737(cytoplasm);GO:0005886(plasma membrane);GO:0007268(chemical synaptic transmission);GO:0007416(synapse assembly);GO:0030036(actin cytoskeleton organization);GO:0035556(intracellular signal transduction);GO:0042246(tissue regeneration);GO:0043325(phosphatidylinositol-3,4-bisphosphate binding);GO:0045545(syndecan binding);GO:00551…	NA	K17254	NA
0	ENSDARG00000099281	si:dkey-112e7.2	3.88714	2.75865	0.494747	0	0	si:dkey-112e7.2 [Source:ZFIN;Acc:ZDB-GENE-141216-229]	GO:0016020(membrane);GO:0016021(integral component of membrane)	NA	NA	NA
0	ENSDARG00000092870	BX936337.1	1.94916	1.38384	0.494178	0	0	NA	NA	NA	NA	NA
0	ENSDARG00000041878	rab11ba	1.61127	1.14398	0.494136	0	0	RAB11B, member RAS oncogene family, a [Source:ZFIN;Acc:ZDB-GENE-040426-2860]	GO:0003924(GTPase activity);GO:0005525(GTP binding);GO:0005768(endosome);GO:0006886(intracellular protein transport);GO:0006887(exocytosis);GO:0032482(Rab protein signal transduction);GO:0055037(recycling endosome)	04144(Endocytosis)	K07905	NA
0	ENSDARG00000037746	actb1	27.2057	19.3301	0.493063	0	0	actin, beta 1 [Source:ZFIN;Acc:ZDB-GENE-000329-1]	GO:0000166(nucleotide binding);GO:0005524(ATP binding);GO:0005634(nucleus);GO:0005737(cytoplasm);GO:0005856(cytoskeleton);GO:0005886(plasma membrane);GO:0005925(focal adhesion);GO:0015629(actin cytoskeleton);GO:0097433(dense body)	04145(Phagosome);04210(Apoptosis);04510(Focal adhesion);04520(Adherens junction);04530(Tight junction);04810(Regulation of actin cytoskeleton);05132(Salmonella infection)	K05692	NA
0	ENSDARG00000035652	sat1a.1	1.00834	0.717302	0.491326	0	0	spermidine/spermine N1-acetyltransferase 1a, duplicate 1 [Source:ZFIN;Acc:ZDB-GENE-050913-41]	GO:0004145(diamine N-acetyltransferase activity);GO:0005515(protein binding);GO:0008080(N-acetyltransferase activity);GO:0019809(spermidine binding);GO:0032918(spermidine acetylation)	00330(Arginine and proline metabolism);04216(Ferroptosis)	K00657	EC:2.3.1.57
0	ENSDARG00000036456	anxa4	3.78109	2.69039	0.490987	0	0	annexin A4 [Source:ZFIN;Acc:ZDB-GENE-030707-1]	GO:0005509(calcium ion binding);GO:0005544(calcium-dependent phospholipid binding)	NA	K17093	NA
0	ENSDARG00000060200	CU019662.1	2.03367	1.44876	0.489262	0	0	regulator of G protein signaling 14b [Source:NCBI gene;Acc:100003648]	GO:0001965(G-protein alpha-subunit binding);GO:0005092(GDP-dissociation inhibitor activity);GO:0005096(GTPase activator activity);GO:0007051(spindle organization);GO:0007165(signal transduction);GO:0008017(microtubule binding);GO:0030695(GTPase regulator activity);GO:0035556(intracellular signal transduction);GO:0043547(positive regulation of GTPase activity);GO:0050790(regulation of catalytic ac…	NA	K16449	NA
0	ENSDARG00000039830	gng5	3.08319	2.19814	0.488138	0	0	guanine nucleotide binding protein (G protein), gamma 5 [Source:ZFIN;Acc:ZDB-GENE-030131-9966]	GO:0003924(GTPase activity);GO:0005515(protein binding);GO:0005834(heterotrimeric G-protein complex);GO:0005886(plasma membrane);GO:0007165(signal transduction);GO:0007186(G protein-coupled receptor signaling pathway);GO:0016020(membrane);GO:0030165(PDZ domain binding);GO:0031680(G-protein beta/gamma-subunit complex);GO:0072513(positive regulation of secondary heart field cardioblast proliferatio…	04371(Apelin signaling pathway)	K04542	NA
0	ENSDARG00000055713	fmnl1a	4.08862	2.91613	0.487557	0	0	formin-like 1a [Source:ZFIN;Acc:ZDB-GENE-120215-83]	GO:0003779(actin binding);GO:0007010(cytoskeleton organization);GO:0008360(regulation of cell shape);GO:0016043(cellular component organization);GO:0017048(Rho GTPase binding);GO:0030036(actin cytoskeleton organization)	NA	NA	NA
0	ENSDARG00000096359	eppk1	0.748912	0.534344	0.487026	0	0	epiplakin 1 [Source:ZFIN;Acc:ZDB-GENE-030416-1]	GO:0005198(structural molecule activity);GO:0005737(cytoplasm);GO:0005856(cytoskeleton);GO:0005882(intermediate filament);GO:0007010(cytoskeleton organization);GO:0008092(cytoskeletal protein binding);GO:0016020(membrane);GO:0042060(wound healing);GO:0045095(keratin filament);GO:0045104(intermediate filament cytoskeleton organization);GO:0045110(intermediate filament bundle assembly);GO:1990254(k…	NA	NA	NA
0	ENSDARG00000053291	pnrc2	39.5447	28.2201	0.486761	0	0	proline-rich nuclear receptor coactivator 2 [Source:ZFIN;Acc:ZDB-GENE-030131-5475]	GO:0000184(nuclear-transcribed mRNA catabolic process, nonsense-mediated decay);GO:0000932(P-body);GO:0000956(nuclear-transcribed mRNA catabolic process);GO:0005634(nucleus);GO:0005737(cytoplasm)	NA	K18751	NA
0	ENSDARG00000099690	vaspa	1.63274	1.16602	0.485704	0	0	vasodilator stimulated phosphoprotein a [Source:ZFIN;Acc:ZDB-GENE-070424-68]	GO:0008154(actin polymerization or depolymerization)	04510(Focal adhesion);04530(Tight junction)	K06274	NA
0	ENSDARG00000023185	si:rp71-1g18.13	0.987204	0.705065	0.485592	0	0	si:rp71-1g18.13 [Source:ZFIN;Acc:ZDB-GENE-040724-111]	GO:0005576(extracellular region);GO:0006869(lipid transport);GO:0008289(lipid binding);GO:0042157(lipoprotein metabolic process)	NA	NA	NA
0	ENSDARG00000071065	g6pd	1.34576	0.961335	0.48531	0	0	glucose-6-phosphate dehydrogenase [Source:ZFIN;Acc:ZDB-GENE-070508-4]	GO:0004345(glucose-6-phosphate dehydrogenase activity);GO:0005975(carbohydrate metabolic process);GO:0006006(glucose metabolic process);GO:0006098(pentose-phosphate shunt);GO:0016491(oxidoreductase activity);GO:0050661(NADP binding);GO:0055114(oxidation-reduction process);GO:0090504(epiboly)	00030(Pentose phosphate pathway);00480(Glutathione metabolism)	K00036	1.1.1.363;EC:1.1.1.49
0	ENSDARG00000025797	abhd2a	1.2838	0.918376	0.483261	0	0	abhydrolase domain containing 2a [Source:ZFIN;Acc:ZDB-GENE-040426-784]	GO:0003707(steroid hormone receptor activity);GO:0005886(plasma membrane);GO:0006629(lipid metabolic process);GO:0016020(membrane);GO:0016021(integral component of membrane);GO:0016042(lipid catabolic process);GO:0016298(lipase activity);GO:0016787(hydrolase activity);GO:0032570(response to progesterone);GO:0034338(short-chain carboxylesterase activity);GO:0036126(sperm flagellum);GO:0042562(horm…	NA	K13697	NA
0	ENSDARG00000057882	arpc3	5.45675	3.91052	0.480681	0	0	actin related protein 2/3 complex, subunit 3 [Source:ZFIN;Acc:ZDB-GENE-040625-107]	GO:0003779(actin binding);GO:0005737(cytoplasm);GO:0005856(cytoskeleton);GO:0005885(Arp2/3 protein complex);GO:0030833(regulation of actin filament polymerization);GO:0034314(Arp2/3 complex-mediated actin nucleation);GO:0051015(actin filament binding)	04144(Endocytosis);04810(Regulation of actin cytoskeleton);05132(Salmonella infection)	K05756	NA
0	ENSDARG00000038076	romo1	7.19753	5.15822	0.480628	0	0	reactive oxygen species modulator 1 [Source:ZFIN;Acc:ZDB-GENE-040426-1768]	GO:0001302(replicative cell aging);GO:0003674(molecular_function);GO:0005739(mitochondrion);GO:0005743(mitochondrial inner membrane);GO:0005744(TIM23 mitochondrial import inner membrane translocase complex);GO:0008284(positive regulation of cell population proliferation);GO:0016020(membrane);GO:0016021(integral component of membrane);GO:0030150(protein import into mitochondrial matrix);GO:0034614…	NA	NA	NA
0	ENSDARG00000030938	fermt3b	2.65832	1.90677	0.479378	0	0	fermitin family member 3b [Source:ZFIN;Acc:ZDB-GENE-040426-1366]	GO:0007229(integrin-mediated signaling pathway)	NA	K17084	NA
0	ENSDARG00000032103	mapk6	1.90144	1.36629	0.476825	0	0	mitogen-activated protein kinase 6 [Source:ZFIN;Acc:ZDB-GENE-050420-7]	GO:0000165(MAPK cascade);GO:0004672(protein kinase activity);GO:0004707(MAP kinase activity);GO:0005524(ATP binding);GO:0005634(nucleus);GO:0005737(cytoplasm);GO:0006468(protein phosphorylation);GO:0010468(regulation of gene expression);GO:0016301(kinase activity);GO:0016310(phosphorylation);GO:0035556(intracellular signal transduction);GO:0071310(cellular response to organic substance)	NA	K06855	EC:2.7.11.24
0	ENSDARG00000058992	cers2b	1.42279	1.02853	0.468145	0	0	ceramide synthase 2b [Source:ZFIN;Acc:ZDB-GENE-110408-40]	GO:0003677(DNA binding);GO:0005634(nucleus);GO:0005783(endoplasmic reticulum);GO:0016020(membrane);GO:0016021(integral component of membrane);GO:0046513(ceramide biosynthetic process);GO:0050291(sphingosine N-acyltransferase activity);GO:0106097(cellular response to ceramide)	NA	NA	NA
0	ENSDARG00000045959	csf3r	0.954613	0.690585	0.467097	0	0	colony stimulating factor 3 receptor (granulocyte) [Source:ZFIN;Acc:ZDB-GENE-080104-4]	GO:0004896(cytokine receptor activity);GO:0004921(interleukin-11 receptor activity);GO:0005515(protein binding);GO:0008284(positive regulation of cell population proliferation);GO:0009897(external side of plasma membrane);GO:0016020(membrane);GO:0016021(integral component of membrane);GO:0019221(cytokine-mediated signaling pathway);GO:0019955(cytokine binding);GO:0019970(interleukin-11 binding);G…	04060(Cytokine-cytokine receptor interaction)	K05061	NA
0	ENSDARG00000019062	arpc5b	1.5122	1.09488	0.465875	0	0	actin related protein 2/3 complex, subunit 5B [Source:ZFIN;Acc:ZDB-GENE-040120-7]	GO:0005737(cytoplasm);GO:0005856(cytoskeleton);GO:0005885(Arp2/3 protein complex);GO:0015629(actin cytoskeleton);GO:0016477(cell migration);GO:0030833(regulation of actin filament polymerization);GO:0034314(Arp2/3 complex-mediated actin nucleation);GO:0051015(actin filament binding)	04144(Endocytosis);04810(Regulation of actin cytoskeleton);05132(Salmonella infection)	K05754	NA
0	ENSDARG00000099774	cyb5b	1.39089	1.00747	0.465262	0	0	cytochrome b5 type B [Source:ZFIN;Acc:ZDB-GENE-040426-2614]	GO:0016020(membrane);GO:0016021(integral component of membrane);GO:0020037(heme binding);GO:0046872(metal ion binding)	NA	NA	NA
0	ENSDARG00000052859	chp1	1.23571	0.896072	0.463653	0	0	calcineurin-like EF-hand protein 1 [Source:ZFIN;Acc:ZDB-GENE-030131-4086]	GO:0005509(calcium ion binding);GO:0005575(cellular_component)	NA	K17610	NA
0	ENSDARG00000033437	rps6ka1	1.43296	1.04026	0.46206	0	0	ribosomal protein S6 kinase a, polypeptide 1 [Source:ZFIN;Acc:ZDB-GENE-060929-516]	GO:0000166(nucleotide binding);GO:0000287(magnesium ion binding);GO:0004672(protein kinase activity);GO:0004674(protein serine/threonine kinase activity);GO:0004711(ribosomal protein S6 kinase activity);GO:0005524(ATP binding);GO:0006468(protein phosphorylation);GO:0016301(kinase activity);GO:0016310(phosphorylation);GO:0016740(transferase activity);GO:0035556(intracellular signal transduction)	04010(MAPK signaling pathway);04114(Oocyte meiosis);04150(mTOR signaling pathway);04914(Progesterone-mediated oocyte maturation)	K04373	EC:2.7.11.1
0	ENSDARG00000006019	tktb	2.60092	1.89075	0.460063	0	0	transketolase b [Source:ZFIN;Acc:ZDB-GENE-030909-13]	GO:0003824(catalytic activity)	00030(Pentose phosphate pathway)	K00615	EC:2.2.1.1
0	ENSDARG00000057433	st6galnac5b	0.852706	0.619969	0.459852	0	0	ST6 (alpha-N-acetyl-neuraminyl-2,3-beta-galactosyl-1,3)-N-acetylgalactosaminide alpha-2,6-sialyltransferase 5b [Source:ZFIN;Acc:ZDB-GENE-040912-25]	GO:0005794(Golgi apparatus);GO:0006486(protein glycosylation);GO:0008373(sialyltransferase activity);GO:0016020(membrane);GO:0016021(integral component of membrane);GO:0016740(transferase activity);GO:0016757(transferase activity, transferring glycosyl groups);GO:0097503(sialylation)	NA	NA	NA
0	ENSDARG00000073872	tpst1	0.892674	0.65048	0.456627	0	0	tyrosylprotein sulfotransferase 1 [Source:ZFIN;Acc:ZDB-GENE-000210-10]	GO:0000139(Golgi membrane);GO:0005794(Golgi apparatus);GO:0006478(peptidyl-tyrosine sulfation);GO:0008476(protein-tyrosine sulfotransferase activity);GO:0016020(membrane);GO:0016021(integral component of membrane);GO:0016740(transferase activity);GO:0030173(integral component of Golgi membrane)	NA	K01021	EC:2.8.2.20
0	ENSDARG00000061841	tiparp	1.90943	1.39315	0.454793	0	0	TCDD-inducible poly(ADP-ribose) polymerase [Source:ZFIN;Acc:ZDB-GENE-031002-47]	GO:0003950(NAD+ ADP-ribosyltransferase activity);GO:0005575(cellular_component);GO:0008270(zinc ion binding);GO:0046872(metal ion binding);GO:0071466(cellular response to xenobiotic stimulus)	NA	K15259	EC:2.4.2.30
0	ENSDARG00000011449	fes	1.23406	0.900847	0.454059	0	0	FES proto-oncogene, tyrosine kinase [Source:ZFIN;Acc:ZDB-GENE-100812-10]	GO:0000166(nucleotide binding);GO:0004672(protein kinase activity);GO:0004713(protein tyrosine kinase activity);GO:0004715(non-membrane spanning protein tyrosine kinase activity);GO:0005524(ATP binding);GO:0005737(cytoplasm);GO:0005856(cytoskeleton);GO:0006468(protein phosphorylation);GO:0006935(chemotaxis);GO:0007155(cell adhesion);GO:0016301(kinase activity);GO:0016310(phosphorylation);GO:00167…	NA	K07527	EC:2.7.10.2
0	ENSDARG00000077337	si:ch211-171h4.5	0.827973	0.60461	0.453579	0	0	si:ch211-171h4.5 [Source:ZFIN;Acc:ZDB-GENE-081104-151]	NA	NA	NA	NA
0	ENSDARG00000039490	pitpnaa	1.57254	1.14915	0.452531	0	0	phosphatidylinositol transfer protein, alpha a [Source:ZFIN;Acc:ZDB-GENE-040426-744]	GO:0005548(phospholipid transporter activity);GO:0005622(intracellular);GO:0005634(nucleus);GO:0005737(cytoplasm);GO:0005829(cytosol);GO:0007409(axonogenesis);GO:0008525(phosphatidylcholine transporter activity);GO:0008526(phosphatidylinositol transporter activity);GO:0015914(phospholipid transport);GO:0031210(phosphatidylcholine binding);GO:0035091(phosphatidylinositol binding);GO:0043009(chorda…	NA	NA	NA
0	ENSDARG00000094673	rhoab	6.76968	4.94765	0.452345	0	0	ras homolog gene family, member Ab [Source:ZFIN;Acc:ZDB-GENE-040322-2]	GO:0000166(nucleotide binding);GO:0003924(GTPase activity);GO:0005525(GTP binding);GO:0005622(intracellular);GO:0005737(cytoplasm);GO:0005886(plasma membrane);GO:0005938(cell cortex);GO:0007015(actin filament organization);GO:0007264(small GTPase mediated signal transduction);GO:0007266(Rho protein signal transduction);GO:0008360(regulation of cell shape);GO:0016020(membrane);GO:0016055(Wnt signa…	04144(Endocytosis);04150(mTOR signaling pathway);04270(Vascular smooth muscle contraction);04310(Wnt signaling pathway);04350(TGF-beta signaling pathway);04510(Focal adhesion);04520(Adherens junction);04530(Tight junction);04621(NOD-like receptor signaling pathway);04625(C-type lectin receptor signaling pathway);04810(Regulation of actin cytoskeleton)	K04513	NA
0	ENSDARG00000007347	degs1	1.8455	1.34925	0.451863	0	0	delta(4)-desaturase, sphingolipid 1 [Source:ZFIN;Acc:ZDB-GENE-030131-5283]	GO:0005783(endoplasmic reticulum);GO:0005789(endoplasmic reticulum membrane);GO:0006629(lipid metabolic process);GO:0016020(membrane);GO:0016021(integral component of membrane);GO:0016491(oxidoreductase activity);GO:0030148(sphingolipid biosynthetic process);GO:0042284(sphingolipid delta-4 desaturase activity);GO:0046513(ceramide biosynthetic process);GO:0055114(oxidation-reduction process)	00600(Sphingolipid metabolism)	K04712	1.14.18.5;EC:1.14.19.17
0	ENSDARG00000052674	csnk1a1	3.12859	2.28836	0.451203	0	0	casein kinase 1, alpha 1 [Source:ZFIN;Acc:ZDB-GENE-020419-19]	GO:0000166(nucleotide binding);GO:0004672(protein kinase activity);GO:0004674(protein serine/threonine kinase activity);GO:0005524(ATP binding);GO:0005634(nucleus);GO:0005737(cytoplasm);GO:0006468(protein phosphorylation);GO:0007507(heart development);GO:0016055(Wnt signaling pathway);GO:0016301(kinase activity);GO:0016310(phosphorylation);GO:0018105(peptidyl-serine phosphorylation);GO:0018107(pe…	04310(Wnt signaling pathway);04340(Hedgehog signaling pathway)	K08957	EC:2.7.11.1
0	ENSDARG00000053530	cyp4f3	1.10474	0.808059	0.451171	0	0	cytochrome P450, family 4, subfamily F, polypeptide 3 [Source:ZFIN;Acc:ZDB-GENE-070410-108]	GO:0004497(monooxygenase activity);GO:0005506(iron ion binding);GO:0016491(oxidoreductase activity);GO:0016705(oxidoreductase activity, acting on paired donors, with incorporation or reduction of molecular oxygen);GO:0020037(heme binding);GO:0046872(metal ion binding);GO:0055114(oxidation-reduction process)	00590(Arachidonic acid metabolism)	K17726	1.14.14.79;1.14.14.94;EC:1.14.14.78
0	ENSDARG00000009208	prkcda	1.22092	0.893379	0.450627	0	0	protein kinase C, delta a [Source:ZFIN;Acc:ZDB-GENE-030131-6503]	GO:0000166(nucleotide binding);GO:0004672(protein kinase activity);GO:0004674(protein serine/threonine kinase activity);GO:0004697(protein kinase C activity);GO:0005524(ATP binding);GO:0005634(nucleus);GO:0005737(cytoplasm);GO:0006468(protein phosphorylation);GO:0006915(apoptotic process);GO:0007049(cell cycle);GO:0016301(kinase activity);GO:0016310(phosphorylation);GO:0016740(transferase activit…	04140(Autophagy - animal);04270(Vascular smooth muscle contraction);04621(NOD-like receptor signaling pathway);04625(C-type lectin receptor signaling pathway);04912(GnRH signaling pathway);04933(AGE-RAGE signaling pathway in diabetic complications)	K06068	EC:2.7.11.13
0	ENSDARG00000003017	ube2al	2.97728	2.17891	0.450392	0	0	ubiquitin conjugating enzyme E2 A, like [Source:ZFIN;Acc:ZDB-GENE-030131-4195]	GO:0000166(nucleotide binding);GO:0000209(protein polyubiquitination);GO:0000790(nuclear chromatin);GO:0005524(ATP binding);GO:0006281(DNA repair);GO:0016740(transferase activity);GO:0033503(HULC complex);GO:0043161(proteasome-mediated ubiquitin-dependent protein catabolic process);GO:0061631(ubiquitin conjugating enzyme activity)	04120(Ubiquitin mediated proteolysis)	K10573	EC:2.3.2.23
0	ENSDARG00000021833	ahr2	1.76043	1.2884	0.450339	0	0	aryl hydrocarbon receptor 2 [Source:ZFIN;Acc:ZDB-GENE-990714-16]	GO:0000981(DNA-binding transcription factor activity, RNA polymerase II-specific);GO:0001541(ovarian follicle development);GO:0003677(DNA binding);GO:0004879(nuclear receptor activity);GO:0005515(protein binding);GO:0005634(nucleus);GO:0005737(cytoplasm);GO:0006355(regulation of transcription, DNA-templated);GO:0006357(regulation of transcription by RNA polymerase II);GO:0006805(xenobiotic metabo…	NA	NA	NA
0	ENSDARG00000039980	ppt1	1.92876	1.41219	0.449746	0	0	palmitoyl-protein thioesterase 1 (ceroid-lipofuscinosis, neuronal 1, infantile) [Source:ZFIN;Acc:ZDB-GENE-040426-2653]	GO:0002084(protein depalmitoylation);GO:0005764(lysosome);GO:0006898(receptor-mediated endocytosis);GO:0008474(palmitoyl-(protein) hydrolase activity);GO:0098599(palmitoyl hydrolase activity)	00062(Fatty acid elongation);04142(Lysosome)	K01074	EC:3.1.2.22
0	ENSDARG00000009779	mcl1a	31.4743	23.1044	0.446008	0	0	MCL1, BCL2 family apoptosis regulator a [Source:ZFIN;Acc:ZDB-GENE-000511-7]	GO:0001894(tissue homeostasis);GO:0005741(mitochondrial outer membrane);GO:0007088(regulation of mitotic nuclear division);GO:0008630(intrinsic apoptotic signaling pathway in response to DNA damage);GO:0016020(membrane);GO:0016021(integral component of membrane);GO:0042803(protein homodimerization activity);GO:0042981(regulation of apoptotic process);GO:0043009(chordate embryonic development);GO:…	04210(Apoptosis)	K02539	NA
0	ENSDARG00000054389	rhof	0.768076	0.564158	0.44515	0	0	ras homolog family member F [Source:ZFIN;Acc:ZDB-GENE-050522-280]	GO:0000166(nucleotide binding);GO:0003924(GTPase activity);GO:0005525(GTP binding);GO:0005622(intracellular);GO:0005737(cytoplasm);GO:0005886(plasma membrane);GO:0005938(cell cortex);GO:0007015(actin filament organization);GO:0007264(small GTPase mediated signal transduction);GO:0007266(Rho protein signal transduction);GO:0008360(regulation of cell shape);GO:0016477(cell migration);GO:0019901(pro…	NA	K07872	NA
0	ENSDARG00000077082	agtrap	0.904363	0.665035	0.443471	0	0	angiotensin II receptor-associated protein [Source:ZFIN;Acc:ZDB-GENE-050309-11]	GO:0003674(molecular_function);GO:0038166(angiotensin-activated signaling pathway)	NA	NA	NA
0	ENSDARG00000026865	fam107b	1.58913	1.16938	0.442501	0	0	family with sequence similarity 107 member B [Source:ZFIN;Acc:ZDB-GENE-031030-12]	GO:0003674(molecular_function);GO:0005575(cellular_component);GO:0008150(biological_process)	NA	NA	NA
0	ENSDARG00000101017	CT583642.1	0.688418	0.506766	0.441966	0	0	NA	GO:0005044(scavenger receptor activity);GO:0006898(receptor-mediated endocytosis);GO:0009897(external side of plasma membrane);GO:0016020(membrane)	NA	NA	NA
0	ENSDARG00000100729	tln1	4.30876	3.17742	0.439418	0	0	talin 1 [Source:ZFIN;Acc:ZDB-GENE-031002-48]	GO:0001726(ruffle);GO:0003779(actin binding);GO:0005200(structural constituent of cytoskeleton);GO:0005856(cytoskeleton);GO:0005925(focal adhesion);GO:0007016(cytoskeletal anchoring at plasma membrane);GO:0007155(cell adhesion);GO:0007519(skeletal muscle tissue development);GO:0014033(neural crest cell differentiation);GO:0045214(sarcomere organization);GO:0048703(embryonic viscerocranium morphog…	04510(Focal adhesion)	K06271	NA
0	ENSDARG00000058354	selenot1a	1.97421	1.45723	0.438049	0	0	selenoprotein T, 1a [Source:ZFIN;Acc:ZDB-GENE-030327-6]	GO:0004791(thioredoxin-disulfide reductase activity);GO:0005783(endoplasmic reticulum);GO:0005789(endoplasmic reticulum membrane);GO:0016020(membrane);GO:0016021(integral component of membrane);GO:0016491(oxidoreductase activity);GO:0055114(oxidation-reduction process);GO:0098869(cellular oxidant detoxification)	NA	K22366	NA
0	ENSDARG00000105273	FP074902.2	1.68586	1.24446	0.437967	0	0	si:ch73-295i22.2 [Source:NCBI gene;Acc:100538042]	NA	NA	NA	NA
0	ENSDARG00000018259	atp1a3a	1.27475	0.941228	0.437599	0	0	ATPase Na+/K+ transporting subunit alpha 3a [Source:ZFIN;Acc:ZDB-GENE-001212-7]	GO:0000166(nucleotide binding);GO:0005391(sodium:potassium-exchanging ATPase activity);GO:0005524(ATP binding);GO:0005623(cell);GO:0006811(ion transport);GO:0006813(potassium ion transport);GO:0006883(cellular sodium ion homeostasis);GO:0007626(locomotory behavior);GO:0008556(potassium-transporting ATPase activity);GO:0010248(establishment or maintenance of transmembrane electrochemical gradient)…	04260(Cardiac muscle contraction);04261(Adrenergic signaling in cardiomyocytes)	K01539	EC:7.2.2.13
0	ENSDARG00000033466	tagln2	4.22293	3.11942	0.436967	0	0	transgelin 2 [Source:ZFIN;Acc:ZDB-GENE-020802-2]	GO:0000902(cell morphogenesis);GO:0005515(protein binding);GO:0015629(actin cytoskeleton);GO:0030036(actin cytoskeleton organization)	NA	K20526	NA
0	ENSDARG00000004979	elovl5	0.779581	0.575933	0.436797	0	0	ELOVL fatty acid elongase 5 [Source:ZFIN;Acc:ZDB-GENE-040407-2]	GO:0005783(endoplasmic reticulum);GO:0005789(endoplasmic reticulum membrane);GO:0005887(integral component of plasma membrane);GO:0006629(lipid metabolic process);GO:0006631(fatty acid metabolic process);GO:0006633(fatty acid biosynthetic process);GO:0006636(unsaturated fatty acid biosynthetic process);GO:0009922(fatty acid elongase activity);GO:0016020(membrane);GO:0016021(integral component of …	00062(Fatty acid elongation);01040(Biosynthesis of unsaturated fatty acids)	K10244	EC:2.3.1.199
0	ENSDARG00000056200	abcb9	1.37891	1.01901	0.436362	0	0	ATP-binding cassette, sub-family B (MDR/TAP), member 9 [Source:ZFIN;Acc:ZDB-GENE-050517-12]	GO:0000166(nucleotide binding);GO:0005524(ATP binding);GO:0005765(lysosomal membrane);GO:0015440(peptide-transporting ATPase activity);GO:0015833(peptide transport);GO:0016020(membrane);GO:0016021(integral component of membrane);GO:0016887(ATPase activity);GO:0042626(ATPase activity, coupled to transmembrane movement of substances);GO:0055085(transmembrane transport);GO:1904680(peptide transmembr…	02010(ABC transporters);04142(Lysosome)	K05656	NA
0	ENSDARG00000040158	cdc42l	5.75327	4.25327	0.435808	0	0	cell division cycle 42, like [Source:ZFIN;Acc:ZDB-GENE-030131-6069]	GO:0000166(nucleotide binding);GO:0003924(GTPase activity);GO:0005525(GTP binding);GO:0005622(intracellular);GO:0005737(cytoplasm);GO:0005886(plasma membrane);GO:0005938(cell cortex);GO:0006897(endocytosis);GO:0007015(actin filament organization);GO:0007163(establishment or maintenance of cell polarity);GO:0007264(small GTPase mediated signal transduction);GO:0007266(Rho protein signal transducti…	04010(MAPK signaling pathway);04144(Endocytosis);04370(VEGF signaling pathway);04510(Focal adhesion);04520(Adherens junction);04530(Tight junction);04810(Regulation of actin cytoskeleton);04912(GnRH signaling pathway);04933(AGE-RAGE signaling pathway in diabetic complications);05132(Salmonella infection)	K04393	NA
0	ENSDARG00000035858	cnn2	1.79789	1.33078	0.434033	0	0	calponin 2 [Source:ZFIN;Acc:ZDB-GENE-030131-542]	GO:0003779(actin binding);GO:0005515(protein binding);GO:0005516(calmodulin binding);GO:0005856(cytoskeleton);GO:0007010(cytoskeleton organization);GO:0031032(actomyosin structure organization);GO:0043408(regulation of MAPK cascade);GO:0043535(regulation of blood vessel endothelial cell migration);GO:0048545(response to steroid hormone)	NA	NA	NA
0	ENSDARG00000094295	CR855337.1	1.56913	1.16299	0.432129	0	0	KIAA0040 ortholog [Source:NCBI gene;Acc:100536987]	NA	NA	NA	NA
0	ENSDARG00000092693	tpt1	35.9672	26.6608	0.431959	0	0	tumor protein, translationally-controlled 1 [Source:ZFIN;Acc:ZDB-GENE-990603-10]	GO:0005509(calcium ion binding);GO:0005737(cytoplasm)	NA	NA	NA
0	ENSDARG00000015343	pgd	2.34036	1.73557	0.431324	0	0	phosphogluconate dehydrogenase [Source:ZFIN;Acc:ZDB-GENE-040426-2807]	GO:0004616(phosphogluconate dehydrogenase (decarboxylating) activity);GO:0006098(pentose-phosphate shunt);GO:0016491(oxidoreductase activity);GO:0019521(D-gluconate metabolic process);GO:0050661(NADP binding);GO:0055114(oxidation-reduction process)	00030(Pentose phosphate pathway);00480(Glutathione metabolism)	K00033	1.1.1.343;EC:1.1.1.44
0	ENSDARG00000062933	cmip	6.20092	4.59881	0.431223	0	0	c-Maf inducing protein [Source:ZFIN;Acc:ZDB-GENE-050419-50]	NA	NA	NA	NA
0	ENSDARG00000013153	dennd3b	0.76729	0.569331	0.430505	0	0	DENN/MADD domain containing 3b [Source:ZFIN;Acc:ZDB-GENE-091230-7]	GO:0005515(protein binding);GO:0048484(enteric nervous system development)	NA	NA	NA
0	ENSDARG00000117781	CABZ01073834.1	1.68691	1.25184	0.43034	0	0	NA	NA	NA	NA	NA
0	ENSDARG00000033738	zgc:153867	6.15816	4.57036	0.430194	0	0	zgc:153867 [Source:ZFIN;Acc:ZDB-GENE-030131-9170]	GO:0005509(calcium ion binding)	04270(Vascular smooth muscle contraction);04530(Tight junction)	K12751	NA
0	ENSDARG00000010641	slc20a1b	2.37125	1.7606	0.429585	0	0	solute carrier family 20 (phosphate transporter), member 1b [Source:ZFIN;Acc:ZDB-GENE-030131-260]	GO:0005315(inorganic phosphate transmembrane transporter activity);GO:0006817(phosphate ion transport);GO:0016020(membrane);GO:0016021(integral component of membrane);GO:0055085(transmembrane transport)	NA	K14640	NA
0	ENSDARG00000025375	idh1	1.17795	0.874811	0.429232	0	0	isocitrate dehydrogenase 1 (NADP+), soluble [Source:ZFIN;Acc:ZDB-GENE-031006-1]	GO:0000287(magnesium ion binding);GO:0004450(isocitrate dehydrogenase (NADP+) activity);GO:0005777(peroxisome);GO:0005829(cytosol);GO:0006099(tricarboxylic acid cycle);GO:0006102(isocitrate metabolic process);GO:0006739(NADP metabolic process);GO:0016491(oxidoreductase activity);GO:0016616(oxidoreductase activity, acting on the CH-OH group of donors, NAD or NADP as acceptor);GO:0030097(hemopoiesi…	00020(Citrate cycle (TCA cycle));00480(Glutathione metabolism);04146(Peroxisome)	K00031	EC:1.1.1.42
0	ENSDARG00000055938	tspan14	0.91305	0.678393	0.428572	0	0	tetraspanin 14 [Source:ZFIN;Acc:ZDB-GENE-060825-329]	GO:0003674(molecular_function);GO:0005887(integral component of plasma membrane);GO:0007166(cell surface receptor signaling pathway);GO:0016020(membrane);GO:0016021(integral component of membrane)	NA	K17296	NA
0	ENSDARG00000012016	hpgd	0.983293	0.731057	0.427637	0	0	15-hydroxyprostaglandin dehydrogenase [Source:ZFIN;Acc:ZDB-GENE-080728-2]	GO:0005737(cytoplasm);GO:0016491(oxidoreductase activity);GO:0055114(oxidation-reduction process)	NA	K00069	EC:1.1.1.141
0	ENSDARG00000013539	ikzf1	1.03744	0.771325	0.427612	0	0	IKAROS family zinc finger 1 (Ikaros) [Source:ZFIN;Acc:ZDB-GENE-980526-304]	GO:0003676(nucleic acid binding);GO:0003700(DNA-binding transcription factor activity);GO:0005654(nucleoplasm);GO:0030183(B cell differentiation);GO:0033077(T cell differentiation in thymus);GO:0044212(transcription regulatory region DNA binding);GO:0045944(positive regulation of transcription by RNA polymerase II)	NA	K09220	NA
0	ENSDARG00000052496	arhgap45a	1.22274	0.909407	0.427118	0	0	Rho GTPase activating protein 45a [Source:ZFIN;Acc:ZDB-GENE-140106-47]	GO:0005096(GTPase activator activity);GO:0007165(signal transduction);GO:0035556(intracellular signal transduction);GO:0043547(positive regulation of GTPase activity);GO:0046872(metal ion binding)	NA	K20644	NA
0	ENSDARG00000040812	ncf4	1.43462	1.0672	0.426838	0	0	neutrophil cytosolic factor 4 [Source:ZFIN;Acc:ZDB-GENE-041124-1]	GO:0005515(protein binding);GO:0006801(superoxide metabolic process);GO:0006909(phagocytosis);GO:0016176(superoxide-generating NADPH oxidase activator activity);GO:0035091(phosphatidylinositol binding);GO:0043020(NADPH oxidase complex);GO:0043085(positive regulation of catalytic activity);GO:0045730(respiratory burst)	04145(Phagosome)	K08012	NA
0	ENSDARG00000010032	cmtm7	0.975296	0.725879	0.426112	0	0	CKLF-like MARVEL transmembrane domain containing 7 [Source:ZFIN;Acc:ZDB-GENE-041111-174]	GO:0003674(molecular_function);GO:0008150(biological_process);GO:0016020(membrane);GO:0016021(integral component of membrane)	NA	NA	NA
0	ENSDARG00000004396	b3gnt5b	0.871516	0.648747	0.42587	0	0	UDP-GlcNAc:betaGal beta-1,3-N-acetylglucosaminyltransferase 5b [Source:ZFIN;Acc:ZDB-GENE-041010-166]	GO:0000139(Golgi membrane);GO:0005794(Golgi apparatus);GO:0006486(protein glycosylation);GO:0008378(galactosyltransferase activity);GO:0016020(membrane);GO:0016021(integral component of membrane);GO:0016740(transferase activity);GO:0016757(transferase activity, transferring glycosyl groups)	00601(Glycosphingolipid biosynthesis - lacto and neolacto series)	K03766	EC:2.4.1.206
0	ENSDARG00000061796	rasgrp4	0.995742	0.741522	0.425284	0	0	RAS guanyl releasing protein 4 [Source:ZFIN;Acc:ZDB-GENE-050419-110]	GO:0001945(lymph vessel development);GO:0005085(guanyl-nucleotide exchange factor activity);GO:0005509(calcium ion binding);GO:0005622(intracellular);GO:0007264(small GTPase mediated signal transduction);GO:0035556(intracellular signal transduction);GO:0046872(metal ion binding)	04010(MAPK signaling pathway)	K04350	NA
0	ENSDARG00000038141	atf4b	6.50496	4.84861	0.423971	0	0	activating transcription factor 4b [Source:ZFIN;Acc:ZDB-GENE-070928-23]	GO:0000977(RNA polymerase II regulatory region sequence-specific DNA binding);GO:0000981(DNA-binding transcription factor activity, RNA polymerase II-specific);GO:0003700(DNA-binding transcription factor activity);GO:0005634(nucleus);GO:0005737(cytoplasm);GO:0006355(regulation of transcription, DNA-templated);GO:0006357(regulation of transcription by RNA polymerase II)	04010(MAPK signaling pathway);04137(Mitophagy - animal);04141(Protein processing in endoplasmic reticulum);04210(Apoptosis);04261(Adrenergic signaling in cardiomyocytes);04912(GnRH signaling pathway)	K04374	NA
0	ENSDARG00000074340	serf2	4.56837	3.4053	0.423901	0	0	small EDRK-rich factor 2 [Source:ZFIN;Acc:ZDB-GENE-041108-1]	NA	NA	NA	NA
0	ENSDARG00000058128	msna	11.6854	8.72058	0.422214	0	0	moesin a [Source:ZFIN;Acc:ZDB-GENE-021211-2]	GO:0003779(actin binding);GO:0005856(cytoskeleton);GO:0007492(endoderm development);GO:0008092(cytoskeletal protein binding);GO:0072554(blood vessel lumenization)	04530(Tight junction);04810(Regulation of actin cytoskeleton)	K05763	NA
0	ENSDARG00000021059	alas1	3.87524	2.89299	0.421721	0	0	aminolevulinate, delta-, synthase 1 [Source:ZFIN;Acc:ZDB-GENE-001229-2]	GO:0003824(catalytic activity);GO:0003870(5-aminolevulinate synthase activity);GO:0005739(mitochondrion);GO:0005759(mitochondrial matrix);GO:0006778(porphyrin-containing compound metabolic process);GO:0006782(protoporphyrinogen IX biosynthetic process);GO:0006783(heme biosynthetic process);GO:0009058(biosynthetic process);GO:0016740(transferase activity);GO:0016746(transferase activity, transferr…	00260(Glycine, serine and threonine metabolism);00860(Porphyrin and chlorophyll metabolism)	K00643	EC:2.3.1.37
0	ENSDARG00000086815	MYADM	1.28365	0.959269	0.420244	0	0	si:dkeyp-67a8.2 [Source:ZFIN;Acc:ZDB-GENE-070912-664]	GO:0016020(membrane);GO:0016021(integral component of membrane)	NA	NA	NA
0	ENSDARG00000010556	mmp25b	0.762791	0.57048	0.41911	0	0	matrix metallopeptidase 25b [Source:ZFIN;Acc:ZDB-GENE-100308-4]	GO:0004222(metalloendopeptidase activity);GO:0005615(extracellular space);GO:0006508(proteolysis);GO:0006954(inflammatory response);GO:0008233(peptidase activity);GO:0008237(metallopeptidase activity);GO:0008270(zinc ion binding);GO:0016021(integral component of membrane);GO:0016787(hydrolase activity);GO:0030198(extracellular matrix organization);GO:0030574(collagen catabolic process);GO:0031012…	NA	K08003	EC:3.4.24.-
0	ENSDARG00000038068	ddx5	10.929	8.17932	0.418109	0	0	DEAD (Asp-Glu-Ala-Asp) box helicase 5 [Source:ZFIN;Acc:ZDB-GENE-030131-925]	GO:0000166(nucleotide binding);GO:0003676(nucleic acid binding);GO:0004386(helicase activity);GO:0005524(ATP binding);GO:0016020(membrane);GO:0016021(integral component of membrane);GO:0016787(hydrolase activity)	03040(Spliceosome)	K12823	EC:3.6.4.13
0	ENSDARG00000052438	actr2a	2.33218	1.74549	0.418048	0	0	ARP2 actin related protein 2a homolog [Source:ZFIN;Acc:ZDB-GENE-040426-2894]	GO:0000166(nucleotide binding);GO:0003779(actin binding);GO:0005524(ATP binding);GO:0005737(cytoplasm);GO:0005856(cytoskeleton);GO:0005885(Arp2/3 protein complex);GO:0007015(actin filament organization);GO:0034314(Arp2/3 complex-mediated actin nucleation)	04530(Tight junction)	K17260	NA
0	ENSDARG00000069432	plscr3b	1.52254	1.14037	0.416973	0	0	phospholipid scramblase 3b [Source:ZFIN;Acc:ZDB-GENE-040426-2517]	GO:0017121(plasma membrane phospholipid scrambling);GO:0017128(phospholipid scramblase activity)	NA	NA	NA
0	ENSDARG00000009505	prelid3b	5.7414	4.30158	0.416536	0	0	PRELI domain containing 3 [Source:ZFIN;Acc:ZDB-GENE-031002-13]	GO:0005758(mitochondrial intermembrane space);GO:0015914(phospholipid transport);GO:1990050(phosphatidic acid transporter activity)	NA	NA	NA
0	ENSDARG00000087402	tpm1	1.63441	1.22455	0.416522	0	0	tropomyosin 1 (alpha) [Source:ZFIN;Acc:ZDB-GENE-040426-854]	GO:0005884(actin filament);GO:0007015(actin filament organization);GO:0051015(actin filament binding)	04260(Cardiac muscle contraction);04261(Adrenergic signaling in cardiomyocytes)	K10373	NA
0	ENSDARG00000073970	mctp2b	0.69861	0.523739	0.415638	0	0	multiple C2 domains, transmembrane 2b [Source:ZFIN;Acc:ZDB-GENE-050506-136]	GO:0003674(molecular_function);GO:0008150(biological_process);GO:0016020(membrane);GO:0016021(integral component of membrane);GO:0030672(synaptic vesicle membrane)	NA	NA	NA
0	ENSDARG00000099532	ubl3a	1.61183	1.20916	0.414692	0	0	ubiquitin-like 3a [Source:ZFIN;Acc:ZDB-GENE-030131-3431]	GO:0003674(molecular_function);GO:0005515(protein binding);GO:0005886(plasma membrane);GO:0016020(membrane)	NA	NA	NA
0	ENSDARG00000018174	gnai2a	3.26007	2.44714	0.413805	0	0	guanine nucleotide binding protein (G protein), alpha inhibiting activity polypeptide 2a [Source:ZFIN;Acc:ZDB-GENE-030131-8365]	GO:0000166(nucleotide binding);GO:0001664(G protein-coupled receptor binding);GO:0003924(GTPase activity);GO:0005525(GTP binding);GO:0005834(heterotrimeric G-protein complex);GO:0007165(signal transduction);GO:0007186(G protein-coupled receptor signaling pathway);GO:0007188(adenylate cyclase-modulating G protein-coupled receptor signaling pathway);GO:0019001(guanyl nucleotide binding);GO:0031683(…	04261(Adrenergic signaling in cardiomyocytes);04371(Apelin signaling pathway);04540(Gap junction);04914(Progesterone-mediated oocyte maturation);04916(Melanogenesis)	K04630	NA
0	ENSDARG00000042876	abracl	3.06331	2.30074	0.412995	0	0	ABRA C-terminal like [Source:ZFIN;Acc:ZDB-GENE-030131-8594]	GO:0032970(regulation of actin filament-based process)	NA	NA	NA
0	ENSDARG00000059304	chchd2	1.32105	0.993696	0.410806	0	0	coiled-coil-helix-coiled-coil-helix domain containing 2 [Source:ZFIN;Acc:ZDB-GENE-040426-1737]	GO:0005634(nucleus);GO:0005739(mitochondrion);GO:0007005(mitochondrion organization)	NA	K22758	NA
0	ENSDARG00000087616	maptb	1.18049	0.88926	0.408714	0	0	microtubule-associated protein tau b [Source:ZFIN;Acc:ZDB-GENE-081027-2]	GO:0000226(microtubule cytoskeleton organization);GO:0005737(cytoplasm);GO:0005856(cytoskeleton);GO:0005874(microtubule);GO:0008017(microtubule binding);GO:0015631(tubulin binding);GO:0031175(neuron projection development);GO:0043005(neuron projection)	04010(MAPK signaling pathway)	K04380	NA
0	ENSDARG00000037919	rbbp6	4.97863	3.7564	0.406399	0	0	retinoblastoma binding protein 6 [Source:ZFIN;Acc:ZDB-GENE-040930-5]	GO:0003676(nucleic acid binding);GO:0004842(ubiquitin-protein transferase activity);GO:0006397(mRNA processing);GO:0008270(zinc ion binding);GO:0016567(protein ubiquitination);GO:0061630(ubiquitin protein ligase activity)	NA	NA	NA
0	ENSDARG00000021124	cfl1	26.4856	19.9837	0.406388	0	0	cofilin 1 [Source:ZFIN;Acc:ZDB-GENE-030131-215]	GO:0003779(actin binding);GO:0005622(intracellular);GO:0007015(actin filament organization);GO:0015629(actin cytoskeleton);GO:0030030(cell projection organization);GO:0030042(actin filament depolymerization);GO:0055113(epiboly involved in gastrulation with mouth forming second);GO:0060271(cilium assembly);GO:0061371(determination of heart left/right asymmetry);GO:0070586(cell-cell adhesion involv…	04810(Regulation of actin cytoskeleton)	K05765	NA
0	ENSDARG00000013628	cd164	1.12193	0.846618	0.406206	0	0	CD164 molecule, sialomucin [Source:ZFIN;Acc:ZDB-GENE-030131-1598]	GO:0003014(renal system process);GO:0016020(membrane);GO:0016021(integral component of membrane);GO:0031410(cytoplasmic vesicle)	04142(Lysosome)	K06546	NA
0	ENSDARG00000054191	pgk1	2.98432	2.25221	0.406061	0	0	phosphoglycerate kinase 1 [Source:ZFIN;Acc:ZDB-GENE-040426-2711]	GO:0001666(response to hypoxia);GO:0004618(phosphoglycerate kinase activity);GO:0005524(ATP binding);GO:0005829(cytosol);GO:0006094(gluconeogenesis);GO:0006096(glycolytic process);GO:0016301(kinase activity);GO:0016310(phosphorylation);GO:0016740(transferase activity);GO:0043531(ADP binding);GO:1903862(positive regulation of oxidative phosphorylation)	00010(Glycolysis / Gluconeogenesis)	K00927	EC:2.7.2.3
0	ENSDARG00000040874	add3a	2.14091	1.61593	0.405859	0	0	adducin 3 (gamma) a [Source:ZFIN;Acc:ZDB-GENE-030131-2721]	GO:0005198(structural molecule activity);GO:0005856(cytoskeleton);GO:0014069(postsynaptic density);GO:0030507(spectrin binding);GO:0044853(plasma membrane raft);GO:0051015(actin filament binding);GO:0051016(barbed-end actin filament capping);GO:0051017(actin filament bundle assembly);GO:0061008(hepaticobiliary system development)	NA	K18622	NA
0	ENSDARG00000075369	nck1b	1.37876	1.04099	0.405414	0	0	NCK adaptor protein 1b [Source:ZFIN;Acc:ZDB-GENE-090317-1]	GO:0005070(SH3/SH2 adaptor activity);GO:0005515(protein binding);GO:0005737(cytoplasm);GO:0005783(endoplasmic reticulum);GO:0006417(regulation of translation);GO:0009967(positive regulation of signal transduction)	04012(ErbB signaling pathway)	K07365	NA
0	ENSDARG00000044339	rp2	1.19532	0.903025	0.404562	0	0	RP2, ARL3 GTPase activating protein [Source:ZFIN;Acc:ZDB-GENE-040426-2795]	GO:0000166(nucleotide binding);GO:0000902(cell morphogenesis);GO:0001947(heart looping);GO:0005096(GTPase activator activity);GO:0005525(GTP binding);GO:0005886(plasma membrane);GO:0005929(cilium);GO:0010842(retina layer formation);GO:0015031(protein transport);GO:0016020(membrane);GO:0035845(photoreceptor cell outer segment organization);GO:0042461(photoreceptor cell development);GO:0042995(cell…	NA	K18272	NA
0	ENSDARG00000071251	ppp1r18	1.63685	1.23918	0.401541	0	0	protein phosphatase 1, regulatory subunit 18 [Source:ZFIN;Acc:ZDB-GENE-060503-350]	GO:0019902(phosphatase binding)	NA	K17559	NA
0	ENSDARG00000103522	si:zfos-943e10.1	1.35575	1.0265	0.40136	0	0	si:zfos-943e10.1 [Source:ZFIN;Acc:ZDB-GENE-030131-5694]	GO:0016020(membrane);GO:0016021(integral component of membrane)	NA	NA	NA
0	ENSDARG00000018976	sptlc2a	0.930902	0.704984	0.401038	0	0	serine palmitoyltransferase, long chain base subunit 2a [Source:ZFIN;Acc:ZDB-GENE-050522-23]	GO:0003824(catalytic activity);GO:0009058(biosynthetic process);GO:0016020(membrane);GO:0016021(integral component of membrane);GO:0016740(transferase activity);GO:0030170(pyridoxal phosphate binding)	00600(Sphingolipid metabolism)	K00654	EC:2.3.1.50
0	ENSDARG00000056600	papss2b	1.58776	1.20286	0.400519	0	0	3'-phosphoadenosine 5'-phosphosulfate synthase 2b [Source:ZFIN;Acc:ZDB-GENE-010323-5]	GO:0000103(sulfate assimilation);GO:0004020(adenylylsulfate kinase activity);GO:0004781(sulfate adenylyltransferase (ATP) activity);GO:0005524(ATP binding);GO:0016310(phosphorylation);GO:0016779(nucleotidyltransferase activity);GO:0050428(3'-phosphoadenosine 5'-phosphosulfate biosynthetic process)	00230(Purine metabolism);00450(Selenocompound metabolism);00920(Sulfur metabolism)	K13811	2.7.1.25;EC:2.7.7.4
0	ENSDARG00000097470	FP015862.2	0.944317	0.715738	0.399841	0	0	NA	NA	NA	NA	NA
0	ENSDARG00000079591	si:ch211-203d1.3	0.990488	0.750951	0.39942	0	0	si:ch211-203d1.3 [Source:ZFIN;Acc:ZDB-GENE-160113-15]	GO:0003779(actin binding);GO:0004725(protein tyrosine phosphatase activity);GO:0005737(cytoplasm);GO:0006470(protein dephosphorylation);GO:0008064(regulation of actin polymerization or depolymerization);GO:0008138(protein tyrosine/serine/threonine phosphatase activity);GO:0010591(regulation of lamellipodium assembly);GO:0016311(dephosphorylation);GO:0016787(hydrolase activity);GO:0016791(phosphat…	04810(Regulation of actin cytoskeleton)	K05766	3.1.3.48;EC:3.1.3.16
0	ENSDARG00000100442	cfh	0.924944	0.701774	0.39836	0	0	complement factor H [Source:ZFIN;Acc:ZDB-GENE-050208-661]	GO:0003674(molecular_function);GO:0005575(cellular_component);GO:0008150(biological_process)	NA	NA	NA
0	ENSDARG00000022303	higd1a	7.94878	6.03126	0.398274	0	0	HIG1 hypoxia inducible domain family, member 1A [Source:ZFIN;Acc:ZDB-GENE-030826-15]	GO:0016020(membrane);GO:0016021(integral component of membrane)	NA	NA	NA
0	ENSDARG00000056856	tax1bp1b	2.10487	1.59849	0.397015	0	0	Tax1 (human T-cell leukemia virus type I) binding protein 1b [Source:ZFIN;Acc:ZDB-GENE-030131-2872]	GO:0006915(apoptotic process);GO:0046872(metal ion binding)	04137(Mitophagy - animal)	K21347	NA
0	ENSDARG00000101034	si:dkey-206d17.12	4.29138	3.26239	0.395515	0	0	si:dkey-206d17.12 [Source:ZFIN;Acc:ZDB-GENE-081031-82]	GO:0046872(metal ion binding)	NA	K18668	EC:3.1.-.-
0	ENSDARG00000069044	agpat4	0.757195	0.575965	0.394684	0	0	1-acylglycerol-3-phosphate O-acyltransferase 4 (lysophosphatidic acid acyltransferase, delta) [Source:ZFIN;Acc:ZDB-GENE-040426-1924]	GO:0003841(1-acylglycerol-3-phosphate O-acyltransferase activity);GO:0005741(mitochondrial outer membrane);GO:0006644(phospholipid metabolic process);GO:0016020(membrane);GO:0016021(integral component of membrane);GO:0016746(transferase activity, transferring acyl groups)	00561(Glycerolipid metabolism);00564(Glycerophospholipid metabolism)	K13523	2.3.1.-;EC:2.3.1.51
0	ENSDARG00000078888	iqgap1	1.98138	1.50784	0.394019	0	0	IQ motif containing GTPase activating protein 1 [Source:ZFIN;Acc:ZDB-GENE-050809-24]	GO:0005515(protein binding);GO:0005623(cell);GO:0007165(signal transduction);GO:0043087(regulation of GTPase activity)	04520(Adherens junction);04810(Regulation of actin cytoskeleton)	K16848	NA
0	ENSDARG00000074262	nck1a	0.862985	0.657537	0.392263	0	0	NCK adaptor protein 1a [Source:ZFIN;Acc:ZDB-GENE-070912-547]	GO:0005515(protein binding)	04012(ErbB signaling pathway)	K07365	NA
0	ENSDARG00000024966	MARK4	1.1239	0.856409	0.392142	0	0	si:dkey-31m14.7 [Source:ZFIN;Acc:ZDB-GENE-121214-92]	GO:0000166(nucleotide binding);GO:0000226(microtubule cytoskeleton organization);GO:0004672(protein kinase activity);GO:0004674(protein serine/threonine kinase activity);GO:0005524(ATP binding);GO:0005737(cytoplasm);GO:0006468(protein phosphorylation);GO:0030010(establishment of cell polarity);GO:0035556(intracellular signal transduction);GO:0050321(tau-protein kinase activity)	NA	K08798	EC:2.7.11.1
0	ENSDARG00000056481	vat1	1.51297	1.15315	0.39181	0	0	vesicle amine transport 1 [Source:ZFIN;Acc:ZDB-GENE-030616-178]	GO:0008270(zinc ion binding);GO:0016491(oxidoreductase activity);GO:0048037(cofactor binding);GO:0055114(oxidation-reduction process)	NA	K23167	NA
0	ENSDARG00000058946	CU856539.2	0.983199	0.749419	0.391709	0	0	myosin-IIIb [Source:NCBI gene;Acc:556989]	GO:0000166(nucleotide binding);GO:0003774(motor activity);GO:0003779(actin binding);GO:0005515(protein binding);GO:0005524(ATP binding);GO:0016459(myosin complex)	NA	NA	NA
0	ENSDARG00000100003	glulb	1.40129	1.06842	0.391272	0	0	glutamate-ammonia ligase (glutamine synthase) b [Source:ZFIN;Acc:ZDB-GENE-030131-8417]	GO:0000166(nucleotide binding);GO:0003824(catalytic activity);GO:0004356(glutamate-ammonia ligase activity);GO:0005524(ATP binding);GO:0006542(glutamine biosynthetic process);GO:0006807(nitrogen compound metabolic process);GO:0016874(ligase activity)	00220(Arginine biosynthesis);00250(Alanine, aspartate and glutamate metabolism);00630(Glyoxylate and dicarboxylate metabolism);00910(Nitrogen metabolism);04217(Necroptosis)	K01915	EC:6.3.1.2
0	ENSDARG00000075592	tnfaip8l2a	1.51811	1.15768	0.391033	0	0	tumor necrosis factor, alpha-induced protein 8-like 2a [Source:ZFIN;Acc:ZDB-GENE-060616-38]	GO:0002376(immune system process);GO:0003674(molecular_function);GO:0005737(cytoplasm);GO:0042981(regulation of apoptotic process);GO:0045087(innate immune response)	NA	NA	NA
0	ENSDARG00000104225	ndel1b	1.54948	1.18194	0.390629	0	0	nudE neurodevelopment protein 1-like 1b [Source:ZFIN;Acc:ZDB-GENE-030131-5889]	GO:0000132(establishment of mitotic spindle orientation);GO:0000776(kinetochore);GO:0005737(cytoplasm);GO:0005813(centrosome);GO:0005815(microtubule organizing center);GO:0005819(spindle);GO:0005856(cytoskeleton);GO:0005871(kinesin complex);GO:0005874(microtubule);GO:0007020(microtubule nucleation);GO:0007059(chromosome segregation);GO:0007100(mitotic centrosome separation);GO:0007399(nervous sys…	NA	K16739	NA
0	ENSDARG00000097845	si:ch211-105j21.9	1.41038	1.07612	0.390243	0	0	si:ch211-105j21.9 [Source:ZFIN;Acc:ZDB-GENE-131127-499]	GO:0016020(membrane);GO:0016021(integral component of membrane)	NA	NA	NA
0	ENSDARG00000088040	si:dkeyp-27c8.2	3.02186	2.30922	0.388028	0	0	si:dkeyp-27c8.2 [Source:ZFIN;Acc:ZDB-GENE-090311-51]	GO:0016311(dephosphorylation);GO:0016791(phosphatase activity)	NA	K17619	3.1.3.-;EC:3.1.3.48
0	ENSDARG00000091902	b3gnt2b	1.42904	1.0927	0.387155	0	0	UDP-GlcNAc:betaGal beta-1,3-N-acetylglucosaminyltransferase 2b [Source:ZFIN;Acc:ZDB-GENE-050913-158]	GO:0000139(Golgi membrane);GO:0005783(endoplasmic reticulum);GO:0005794(Golgi apparatus);GO:0006486(protein glycosylation);GO:0008376(acetylgalactosaminyltransferase activity);GO:0008378(galactosyltransferase activity);GO:0008532(N-acetyllactosaminide beta-1,3-N-acetylglucosaminyltransferase activity);GO:0016020(membrane);GO:0016021(integral component of membrane);GO:0016740(transferase activity)…	00533(Glycosaminoglycan biosynthesis - keratan sulfate);00601(Glycosphingolipid biosynthesis - lacto and neolacto series)	K00741	EC:2.4.1.149
0	ENSDARG00000011239	ppp1r14aa	0.668129	0.51105	0.386661	0	0	protein phosphatase 1, regulatory (inhibitor) subunit 14Aa [Source:ZFIN;Acc:ZDB-GENE-050417-413]	GO:0004865(protein serine/threonine phosphatase inhibitor activity);GO:0005737(cytoplasm);GO:0032515(negative regulation of phosphoprotein phosphatase activity);GO:0042325(regulation of phosphorylation)	04270(Vascular smooth muscle contraction)	K12328	NA
0	ENSDARG00000103340	clic1	1.82957	1.40049	0.385579	0	0	chloride intracellular channel 1 [Source:ZFIN;Acc:ZDB-GENE-030131-3202]	GO:0005244(voltage-gated ion channel activity);GO:0005254(chloride channel activity);GO:0005515(protein binding);GO:0005634(nucleus);GO:0005737(cytoplasm);GO:0006811(ion transport);GO:0006821(chloride transport);GO:0016020(membrane);GO:0034220(ion transmembrane transport);GO:0034707(chloride channel complex);GO:0034765(regulation of ion transmembrane transport);GO:0051726(regulation of cell cycle…	NA	K05021	NA
0	ENSDARG00000031435	TXN	10.0934	7.7268	0.385473	0	0	zgc:56493 [Source:ZFIN;Acc:ZDB-GENE-030131-8581]	GO:0005623(cell);GO:0006662(glycerol ether metabolic process);GO:0015035(protein disulfide oxidoreductase activity);GO:0045454(cell redox homeostasis);GO:0055114(oxidation-reduction process)	04621(NOD-like receptor signaling pathway)	K03671	NA
0	ENSDARG00000012040	rnf19a	2.07663	1.59024	0.384996	0	0	ring finger protein 19A, RBR E3 ubiquitin protein ligase [Source:ZFIN;Acc:ZDB-GENE-030131-9414]	GO:0000151(ubiquitin ligase complex);GO:0000209(protein polyubiquitination);GO:0004842(ubiquitin-protein transferase activity);GO:0005737(cytoplasm);GO:0006511(ubiquitin-dependent protein catabolic process);GO:0016020(membrane);GO:0016021(integral component of membrane);GO:0016567(protein ubiquitination);GO:0016740(transferase activity);GO:0031624(ubiquitin conjugating enzyme binding);GO:0032436(…	NA	K11972	EC:2.3.2.31
0	ENSDARG00000053485	aldh6a1	1.57608	1.20768	0.384107	0	0	aldehyde dehydrogenase 6 family, member A1 [Source:ZFIN;Acc:ZDB-GENE-030131-9192]	GO:0004491(methylmalonate-semialdehyde dehydrogenase (acylating) activity);GO:0005739(mitochondrion);GO:0006210(thymine catabolic process);GO:0006573(valine metabolic process);GO:0006574(valine catabolic process);GO:0016491(oxidoreductase activity);GO:0016620(oxidoreductase activity, acting on the aldehyde or oxo group of donors, NAD or NADP as acceptor);GO:0018478(malonate-semialdehyde dehydroge…	00280(Valine, leucine and isoleucine degradation);00410(beta-Alanine metabolism);00562(Inositol phosphate metabolism);00640(Propanoate metabolism)	K00140	1.2.1.27;EC:1.2.1.18
0	ENSDARG00000000767	spi1b	6.12006	4.69533	0.382319	0	0	Spi-1 proto-oncogene b [Source:ZFIN;Acc:ZDB-GENE-980526-164]	GO:0000981(DNA-binding transcription factor activity, RNA polymerase II-specific);GO:0003677(DNA binding);GO:0003700(DNA-binding transcription factor activity);GO:0005515(protein binding);GO:0005634(nucleus);GO:0006355(regulation of transcription, DNA-templated);GO:0006357(regulation of transcription by RNA polymerase II);GO:0010628(positive regulation of gene expression);GO:0030099(myeloid cell …	NA	K09438	NA
0	ENSDARG00000023578	lpp	0.925283	0.710178	0.381714	0	0	LIM domain containing preferred translocation partner in lipoma [Source:ZFIN;Acc:ZDB-GENE-040426-918]	GO:0005515(protein binding);GO:0046872(metal ion binding);GO:0060027(convergent extension involved in gastrulation);GO:0060030(dorsal convergence)	NA	NA	NA
0	ENSDARG00000062049	arhgap45b	2.26954	1.74443	0.379648	0	0	Rho GTPase activating protein 45b [Source:ZFIN;Acc:ZDB-GENE-071213-2]	GO:0005096(GTPase activator activity);GO:0007165(signal transduction);GO:0035556(intracellular signal transduction);GO:0043547(positive regulation of GTPase activity);GO:0046872(metal ion binding)	NA	K20644	NA
0	ENSDARG00000089838	si:dkey-262k9.4	2.50835	1.92891	0.378953	0	0	si:dkey-262k9.4 [Source:ZFIN;Acc:ZDB-GENE-131121-545]	GO:0006811(ion transport);GO:0016020(membrane);GO:0016021(integral component of membrane);GO:0017080(sodium channel regulator activity);GO:0043269(regulation of ion transport);GO:0099106(ion channel regulator activity);GO:2000649(regulation of sodium ion transmembrane transporter activity)	NA	K13362	NA
0	ENSDARG00000039082	zgc:123010	0.831516	0.639708	0.378329	0	0	zgc:123010 [Source:ZFIN;Acc:ZDB-GENE-051120-15]	GO:0003676(nucleic acid binding);GO:0003723(RNA binding);GO:0005515(protein binding);GO:0005575(cellular_component);GO:0008150(biological_process);GO:0046872(metal ion binding)	NA	NA	NA
0	ENSDARG00000020625	jak1	3.56413	2.74279	0.377905	0	0	Janus kinase 1 [Source:ZFIN;Acc:ZDB-GENE-980526-142]	GO:0000166(nucleotide binding);GO:0004672(protein kinase activity);GO:0004713(protein tyrosine kinase activity);GO:0004715(non-membrane spanning protein tyrosine kinase activity);GO:0005524(ATP binding);GO:0005856(cytoskeleton);GO:0006468(protein phosphorylation);GO:0016020(membrane);GO:0016301(kinase activity);GO:0016310(phosphorylation);GO:0016740(transferase activity);GO:0018108(peptidyl-tyros…	04217(Necroptosis);04621(NOD-like receptor signaling pathway);05168(Herpes simplex virus 1 infection)	K11217	EC:2.7.10.2
0	ENSDARG00000017422	apmap	0.801855	0.617194	0.377618	0	0	adipocyte plasma membrane associated protein [Source:ZFIN;Acc:ZDB-GENE-020919-1]	GO:0009058(biosynthetic process);GO:0016020(membrane);GO:0016021(integral component of membrane);GO:0016844(strictosidine synthase activity)	NA	K21407	NA
0	ENSDARG00000022456	eno1a	3.55006	2.73254	0.3776	0	0	enolase 1a, (alpha) [Source:ZFIN;Acc:ZDB-GENE-030131-6048]	GO:0000015(phosphopyruvate hydratase complex);GO:0000287(magnesium ion binding);GO:0004634(phosphopyruvate hydratase activity);GO:0006096(glycolytic process)	00010(Glycolysis / Gluconeogenesis);03018(RNA degradation)	K01689	EC:4.2.1.11
0	ENSDARG00000103483	litaf	3.29689	2.54196	0.375165	0	0	lipopolysaccharide-induced TNF factor [Source:ZFIN;Acc:ZDB-GENE-040704-23]	GO:0000139(Golgi membrane);GO:0003677(DNA binding);GO:0005634(nucleus);GO:0005737(cytoplasm);GO:0005764(lysosome);GO:0005765(lysosomal membrane);GO:0005768(endosome);GO:0005794(Golgi apparatus);GO:0005886(plasma membrane);GO:0008270(zinc ion binding);GO:0009898(cytoplasmic side of plasma membrane);GO:0010008(endosome membrane);GO:0016020(membrane);GO:0031901(early endosome membrane);GO:0031902(la…	04142(Lysosome)	K19363	NA
0	ENSDARG00000067916	lyn	1.55263	1.19719	0.375062	0	0	LYN proto-oncogene, Src family tyrosine kinase [Source:ZFIN;Acc:ZDB-GENE-040912-7]	GO:0000166(nucleotide binding);GO:0004672(protein kinase activity);GO:0004713(protein tyrosine kinase activity);GO:0004715(non-membrane spanning protein tyrosine kinase activity);GO:0005102(signaling receptor binding);GO:0005515(protein binding);GO:0005524(ATP binding);GO:0006468(protein phosphorylation);GO:0007169(transmembrane receptor protein tyrosine kinase signaling pathway);GO:0009611(respo…	NA	K05854	EC:2.7.10.2
0	ENSDARG00000044415	tlr5a	0.712882	0.550085	0.374008	0	0	toll-like receptor 5a [Source:ZFIN;Acc:ZDB-GENE-040219-14]	GO:0002253(activation of immune response);GO:0002376(immune system process);GO:0005515(protein binding);GO:0007165(signal transduction);GO:0016020(membrane);GO:0016021(integral component of membrane);GO:0035325(Toll-like receptor binding);GO:0045087(innate immune response);GO:0046982(protein heterodimerization activity)	04620(Toll-like receptor signaling pathway);05132(Salmonella infection)	K10168	NA
0	ENSDARG00000035198	gcnt4a	1.13031	0.872657	0.373235	0	0	glucosaminyl (N-acetyl) transferase 4a [Source:ZFIN;Acc:ZDB-GENE-030131-3231]	GO:0000139(Golgi membrane);GO:0003829(beta-1,3-galactosyl-O-glycosyl-glycoprotein beta-1,6-N-acetylglucosaminyltransferase activity);GO:0005794(Golgi apparatus);GO:0006486(protein glycosylation);GO:0008375(acetylglucosaminyltransferase activity);GO:0016020(membrane);GO:0016021(integral component of membrane);GO:0016740(transferase activity);GO:0016757(transferase activity, transferring glycosyl g…	00512(Mucin type O-glycan biosynthesis)	K09663	EC:2.4.1.-
0	ENSDARG00000063912	mt-co3	87.3072	67.4079	0.373182	0	0	cytochrome c oxidase III, mitochondrial [Source:ZFIN;Acc:ZDB-GENE-011205-16]	GO:0004129(cytochrome-c oxidase activity);GO:0005739(mitochondrion);GO:0005743(mitochondrial inner membrane);GO:0006123(mitochondrial electron transport, cytochrome c to oxygen);GO:0009055(electron transfer activity);GO:0009060(aerobic respiration);GO:0015002(heme-copper terminal oxidase activity);GO:0015453(oxidoreduction-driven active transmembrane transporter activity);GO:0016020(membrane);GO:…	00190(Oxidative phosphorylation);04260(Cardiac muscle contraction)	K02262	NA
0		NC-002333.17	81.8395	63.2033	0.372798	0	0	NA	NA	NA	NA	NA
0	ENSDARG00000043856	amd1	1.88938	1.45916	0.372777	0	0	adenosylmethionine decarboxylase 1 [Source:ZFIN;Acc:ZDB-GENE-040426-760]	GO:0004014(adenosylmethionine decarboxylase activity);GO:0005829(cytosol);GO:0006557(S-adenosylmethioninamine biosynthetic process);GO:0006596(polyamine biosynthetic process);GO:0006597(spermine biosynthetic process);GO:0008295(spermidine biosynthetic process);GO:0016829(lyase activity);GO:0016831(carboxy-lyase activity)	00270(Cysteine and methionine metabolism);00330(Arginine and proline metabolism)	K01611	EC:4.1.1.50
0	ENSDARG00000021521	rgs14a	0.836999	0.647045	0.37136	0	0	regulator of G protein signaling 14a [Source:ZFIN;Acc:ZDB-GENE-030131-5579]	GO:0001965(G-protein alpha-subunit binding);GO:0005092(GDP-dissociation inhibitor activity);GO:0005096(GTPase activator activity);GO:0007051(spindle organization);GO:0007165(signal transduction);GO:0008017(microtubule binding);GO:0008354(germ cell migration);GO:0030695(GTPase regulator activity);GO:0035556(intracellular signal transduction);GO:0043547(positive regulation of GTPase activity);GO:00…	NA	K16449	NA
0	ENSDARG00000068030	si:cabz01007802.1	0.596289	0.461328	0.37022	0	0	si:cabz01007802.1 [Source:ZFIN;Acc:ZDB-GENE-160728-30]	GO:0005576(extracellular region);GO:0006869(lipid transport);GO:0008289(lipid binding);GO:0016020(membrane);GO:0016021(integral component of membrane);GO:0042157(lipoprotein metabolic process)	NA	K14480	NA
0	ENSDARG00000063908	mt-co2	112.878	87.3391	0.37006	0	0	cytochrome c oxidase II, mitochondrial [Source:ZFIN;Acc:ZDB-GENE-011205-15]	GO:0004129(cytochrome-c oxidase activity);GO:0005507(copper ion binding);GO:0005739(mitochondrion);GO:0005743(mitochondrial inner membrane);GO:0016020(membrane);GO:0016021(integral component of membrane);GO:0016491(oxidoreductase activity);GO:0022900(electron transport chain);GO:0042773(ATP synthesis coupled electron transport);GO:0045277(respiratory chain complex IV);GO:0046872(metal ion binding…	00190(Oxidative phosphorylation);04260(Cardiac muscle contraction)	K02261	NA
0	ENSDARG00000035514	adam28	0.590957	0.45822	0.367011	0	0	ADAM metallopeptidase domain 28 [Source:ZFIN;Acc:ZDB-GENE-060929-532]	GO:0004222(metalloendopeptidase activity);GO:0006508(proteolysis);GO:0008237(metallopeptidase activity);GO:0016020(membrane);GO:0016021(integral component of membrane)	NA	NA	NA
0	ENSDARG00000096959	si:dkey-29h14.10	1.29166	1.00226	0.365969	0	0	si:dkey-29h14.10 [Source:ZFIN;Acc:ZDB-GENE-131127-252]	GO:0042981(regulation of apoptotic process)	NA	NA	NA
0	ENSDARG00000040988	tpi1b	4.93069	3.82657	0.365737	0	0	triosephosphate isomerase 1b [Source:ZFIN;Acc:ZDB-GENE-020416-4]	GO:0003824(catalytic activity);GO:0004807(triose-phosphate isomerase activity);GO:0006094(gluconeogenesis);GO:0006096(glycolytic process);GO:0016853(isomerase activity)	00010(Glycolysis / Gluconeogenesis);00051(Fructose and mannose metabolism);00562(Inositol phosphate metabolism)	K01803	EC:5.3.1.1
0	ENSDARG00000002271	zfand5b	2.92544	2.27036	0.36573	0	0	zinc finger, AN1-type domain 5b [Source:ZFIN;Acc:ZDB-GENE-040426-875]	GO:0003677(DNA binding);GO:0008270(zinc ion binding);GO:0046872(metal ion binding)	NA	NA	NA
0	ENSDARG00000060149	ablim1a	0.572311	0.444297	0.365273	0	0	actin binding LIM protein 1a [Source:ZFIN;Acc:ZDB-GENE-080219-41]	GO:0003779(actin binding);GO:0005575(cellular_component);GO:0007010(cytoskeleton organization);GO:0015629(actin cytoskeleton);GO:0030032(lamellipodium assembly);GO:0046872(metal ion binding);GO:0051015(actin filament binding)	NA	NA	NA
0	ENSDARG00000102320	mob1a	2.1273	1.65244	0.364428	0	0	MOB kinase activator 1A [Source:ZFIN;Acc:ZDB-GENE-030131-6506]	GO:0001756(somitogenesis);GO:0005575(cellular_component);GO:0007417(central nervous system development);GO:0008283(cell population proliferation);GO:0043009(chordate embryonic development)	NA	NA	NA
0	ENSDARG00000026500	xkr9	0.542139	0.421126	0.36441	0	0	XK, Kell blood group complex subunit-related family, member 9 [Source:ZFIN;Acc:ZDB-GENE-060421-6224]	GO:0003674(molecular_function);GO:0005886(plasma membrane);GO:0008150(biological_process);GO:0016020(membrane);GO:0016021(integral component of membrane);GO:0043652(engulfment of apoptotic cell);GO:0070782(phosphatidylserine exposure on apoptotic cell surface);GO:1902742(apoptotic process involved in development)	NA	NA	NA
0	ENSDARG00000101096	cebp1	0.653222	0.507819	0.363259	0	0	CCAAT/enhancer binding protein (C/EBP) 1 [Source:ZFIN;Acc:ZDB-GENE-010611-1]	GO:0000981(DNA-binding transcription factor activity, RNA polymerase II-specific);GO:0003700(DNA-binding transcription factor activity);GO:0005515(protein binding);GO:0006355(regulation of transcription, DNA-templated);GO:0006357(regulation of transcription by RNA polymerase II);GO:0010628(positive regulation of gene expression);GO:0030099(myeloid cell differentiation);GO:0043565(sequence-specifi…	NA	NA	NA
0	ENSDARG00000054588	cox6a2	2.43537	1.89442	0.362382	0	0	cytochrome c oxidase subunit 6A2 [Source:ZFIN;Acc:ZDB-GENE-040912-129]	GO:0004129(cytochrome-c oxidase activity);GO:0005739(mitochondrion);GO:0005743(mitochondrial inner membrane);GO:0005751(mitochondrial respiratory chain complex IV);GO:0006123(mitochondrial electron transport, cytochrome c to oxygen);GO:0009060(aerobic respiration);GO:0016020(membrane);GO:0030234(enzyme regulator activity);GO:0050790(regulation of catalytic activity);GO:1902600(proton transmembran…	00190(Oxidative phosphorylation);04260(Cardiac muscle contraction)	K02266	NA
0	ENSDARG00000102431	CT027744.2	0.9422	0.733536	0.361166	0	0	chemokine like factor [Source:NCBI gene;Acc:100329541]	NA	NA	NA	NA
0	ENSDARG00000016188	SBNO2	2.22049	1.72879	0.361117	0	0	si:ch73-63e15.2 [Source:ZFIN;Acc:ZDB-GENE-091204-463]	GO:0005634(nucleus);GO:0006355(regulation of transcription, DNA-templated);GO:0050727(regulation of inflammatory response)	NA	NA	NA
0	ENSDARG00000103566	tomm20b	2.37307	1.84771	0.361019	0	0	translocase of outer mitochondrial membrane 20b [Source:ZFIN;Acc:ZDB-GENE-040718-451]	GO:0005739(mitochondrion);GO:0005741(mitochondrial outer membrane);GO:0005742(mitochondrial outer membrane translocase complex);GO:0006605(protein targeting);GO:0006886(intracellular protein transport);GO:0008320(protein transmembrane transporter activity);GO:0015031(protein transport);GO:0015450(P-P-bond-hydrolysis-driven protein transmembrane transporter activity);GO:0016020(membrane);GO:001602…	NA	K17770	NA
0	ENSDARG00000057273	alox5a	0.610417	0.475458	0.360476	0	0	arachidonate 5-lipoxygenase a [Source:ZFIN;Acc:ZDB-GENE-090311-47]	GO:0004051(arachidonate 5-lipoxygenase activity);GO:0004464(leukotriene-C4 synthase activity);GO:0005506(iron ion binding);GO:0005515(protein binding);GO:0008391(arachidonic acid monooxygenase activity);GO:0016491(oxidoreductase activity);GO:0016702(oxidoreductase activity, acting on single donors with incorporation of molecular oxygen, incorporation of two atoms of oxygen);GO:0019369(arachidonic…	00590(Arachidonic acid metabolism)	K00461	EC:1.13.11.34
0	ENSDARG00000026712	rab5c	2.24996	1.75293	0.360132	0	0	RAB5C, member RAS oncogene family [Source:ZFIN;Acc:ZDB-GENE-031118-30]	GO:0001525(angiogenesis);GO:0001702(gastrulation with mouth forming second);GO:0003924(GTPase activity);GO:0005515(protein binding);GO:0005525(GTP binding);GO:0005768(endosome);GO:0005769(early endosome);GO:0005886(plasma membrane);GO:0006886(intracellular protein transport);GO:0030100(regulation of endocytosis);GO:0030139(endocytic vesicle);GO:0032482(Rab protein signal transduction);GO:0098609(…	04144(Endocytosis);04145(Phagosome)	K07889	NA
0	ENSDARG00000007323	chmp4bb	2.87349	2.23876	0.360106	0	0	charged multivesicular body protein 4Bb [Source:ZFIN;Acc:ZDB-GENE-040426-2812]	GO:0005737(cytoplasm);GO:0005768(endosome);GO:0005829(cytosol);GO:0007034(vacuolar transport);GO:0009838(abscission);GO:0015031(protein transport);GO:0016020(membrane);GO:0031902(late endosome membrane);GO:0032466(negative regulation of cytokinesis);GO:0044878(mitotic cytokinesis checkpoint)	04144(Endocytosis);04217(Necroptosis)	K12194	NA
0	ENSDARG00000021309	rhoca	1.02412	0.797978	0.359968	0	0	ras homolog family member Ca [Source:ZFIN;Acc:ZDB-GENE-040426-1337]	GO:0000166(nucleotide binding);GO:0003924(GTPase activity);GO:0005525(GTP binding);GO:0005622(intracellular);GO:0005737(cytoplasm);GO:0005886(plasma membrane);GO:0005938(cell cortex);GO:0007015(actin filament organization);GO:0007264(small GTPase mediated signal transduction);GO:0007266(Rho protein signal transduction);GO:0008360(regulation of cell shape);GO:0016477(cell migration);GO:0019901(pro…	NA	NA	NA
0	ENSDARG00000063474	arfgef1	0.773774	0.603138	0.359424	0	0	ADP-ribosylation factor guanine nucleotide-exchange factor 1 (brefeldin A-inhibited) [Source:ZFIN;Acc:ZDB-GENE-030131-108]	GO:0005086(ARF guanyl-nucleotide exchange factor activity);GO:0005802(trans-Golgi network);GO:0016192(vesicle-mediated transport);GO:0032012(regulation of ARF protein signal transduction)	04144(Endocytosis)	K18442	NA
0	ENSDARG00000098570	si:ch211-8c17.2	0.569769	0.444389	0.358555	0	0	si:ch211-8c17.2 [Source:ZFIN;Acc:ZDB-GENE-091204-254]	GO:0016020(membrane);GO:0016021(integral component of membrane)	NA	NA	NA
0	ENSDARG00000007184	zbtb16a	0.980465	0.764743	0.358491	0	0	zinc finger and BTB domain containing 16a [Source:ZFIN;Acc:ZDB-GENE-030131-1989]	GO:0003676(nucleic acid binding);GO:0005515(protein binding)	NA	K10055	NA
0	ENSDARG00000020187	GCA	2.38294	1.86091	0.356732	0	0	zgc:92027 [Source:ZFIN;Acc:ZDB-GENE-040930-3]	GO:0005509(calcium ion binding)	NA	NA	NA
0	ENSDARG00000052348	smarca5	1.38334	1.08053	0.356412	0	0	SWI/SNF related, matrix associated, actin dependent regulator of chromatin, subfamily a, member 5 [Source:ZFIN;Acc:ZDB-GENE-021125-1]	GO:0000166(nucleotide binding);GO:0003231(cardiac ventricle development);GO:0003676(nucleic acid binding);GO:0003677(DNA binding);GO:0004386(helicase activity);GO:0005524(ATP binding);GO:0005634(nucleus);GO:0006325(chromatin organization);GO:0006338(chromatin remodeling);GO:0016589(NURF complex);GO:0016787(hydrolase activity);GO:0016818(hydrolase activity, acting on acid anhydrides, in phosphorus…	NA	K11654	EC:3.6.4.-
0	ENSDARG00000021346	pdhb	1.13198	0.884257	0.356304	0	0	pyruvate dehydrogenase E1 beta subunit [Source:ZFIN;Acc:ZDB-GENE-040426-2173]	GO:0003824(catalytic activity);GO:0004738(pyruvate dehydrogenase activity);GO:0043473(pigmentation);GO:0055114(oxidation-reduction process)	00010(Glycolysis / Gluconeogenesis);00020(Citrate cycle (TCA cycle));00620(Pyruvate metabolism)	K00162	EC:1.2.4.1
0	ENSDARG00000019137	tram1	2.03155	1.58699	0.35629	0	0	translocation associated membrane protein 1 [Source:ZFIN;Acc:ZDB-GENE-021011-1]	GO:0005791(rough endoplasmic reticulum);GO:0006616(SRP-dependent cotranslational protein targeting to membrane, translocation);GO:0015031(protein transport);GO:0016020(membrane);GO:0016021(integral component of membrane)	04141(Protein processing in endoplasmic reticulum)	K14010	NA
0	ENSDARG00000095908	sat1a.2	19.4716	15.2206	0.35534	0	0	spermidine/spermine N1-acetyltransferase 1a, duplicate 2 [Source:ZFIN;Acc:ZDB-GENE-040704-4]	GO:0004145(diamine N-acetyltransferase activity);GO:0005515(protein binding);GO:0005575(cellular_component);GO:0008080(N-acetyltransferase activity);GO:0016740(transferase activity);GO:0019809(spermidine binding);GO:0032918(spermidine acetylation)	00330(Arginine and proline metabolism);04216(Ferroptosis)	K00657	EC:2.3.1.57
0	ENSDARG00000012140	ccnl1b	2.00835	1.57033	0.354937	0	0	cyclin L1b [Source:ZFIN;Acc:ZDB-GENE-030131-4813]	GO:0000079(regulation of cyclin-dependent protein serine/threonine kinase activity);GO:0005634(nucleus);GO:0006355(regulation of transcription, DNA-templated);GO:0006396(RNA processing)	NA	NA	NA
0	ENSDARG00000076025	dgkzb	0.866583	0.677616	0.35487	0	0	diacylglycerol kinase, zeta b [Source:ZFIN;Acc:ZDB-GENE-111104-4]	GO:0000166(nucleotide binding);GO:0003951(NAD+ kinase activity);GO:0004143(diacylglycerol kinase activity);GO:0005515(protein binding);GO:0005524(ATP binding);GO:0005634(nucleus);GO:0007165(signal transduction);GO:0007205(protein kinase C-activating G protein-coupled receptor signaling pathway);GO:0016301(kinase activity);GO:0016310(phosphorylation);GO:0016740(transferase activity);GO:0035556(int…	NA	NA	NA
0	ENSDARG00000010279	scamp2	1.42552	1.11497	0.354482	0	0	secretory carrier membrane protein 2 [Source:ZFIN;Acc:ZDB-GENE-040426-2702]	GO:0000139(Golgi membrane);GO:0005794(Golgi apparatus);GO:0015031(protein transport);GO:0016020(membrane);GO:0016021(integral component of membrane);GO:0032588(trans-Golgi network membrane);GO:0055038(recycling endosome membrane)	NA	K19995	NA
0	ENSDARG00000036774	rgs12b	0.593908	0.464535	0.354452	0	0	regulator of G protein signaling 12b [Source:ZFIN;Acc:ZDB-GENE-031006-13]	GO:0005515(protein binding);GO:0007165(signal transduction);GO:0030695(GTPase regulator activity);GO:0050790(regulation of catalytic activity)	NA	K16449	NA
0	ENSDARG00000046022	tmed7	2.13793	1.67293	0.353834	0	0	transmembrane p24 trafficking protein 7 [Source:ZFIN;Acc:ZDB-GENE-040426-2570]	GO:0005783(endoplasmic reticulum);GO:0005793(endoplasmic reticulum-Golgi intermediate compartment);GO:0005794(Golgi apparatus);GO:0006886(intracellular protein transport);GO:0006888(endoplasmic reticulum to Golgi vesicle-mediated transport);GO:0007030(Golgi organization);GO:0016020(membrane);GO:0016021(integral component of membrane);GO:0030134(COPII-coated ER to Golgi transport vesicle)	NA	K20349	NA
0	ENSDARG00000076742	cyth1a.1	2.02462	1.58481	0.35334	0	0	cytohesin 1a [Source:ZFIN;Acc:ZDB-GENE-030131-657]	GO:0005086(ARF guanyl-nucleotide exchange factor activity);GO:0032012(regulation of ARF protein signal transduction);GO:0055113(epiboly involved in gastrulation with mouth forming second)	04144(Endocytosis)	K18441	NA
0	ENSDARG00000021366	fbp1a	0.8381	0.656619	0.352066	0	0	fructose-1,6-bisphosphatase 1a [Source:ZFIN;Acc:ZDB-GENE-030131-7171]	GO:0005737(cytoplasm);GO:0005829(cytosol);GO:0005975(carbohydrate metabolic process);GO:0005986(sucrose biosynthetic process);GO:0006000(fructose metabolic process);GO:0006002(fructose 6-phosphate metabolic process);GO:0006094(gluconeogenesis);GO:0016311(dephosphorylation);GO:0016787(hydrolase activity);GO:0016791(phosphatase activity);GO:0030388(fructose 1,6-bisphosphate metabolic process);GO:00…	00010(Glycolysis / Gluconeogenesis);00030(Pentose phosphate pathway);00051(Fructose and mannose metabolism);04910(Insulin signaling pathway)	K03841	EC:3.1.3.11
0	ENSDARG00000017757	pik3cg	1.10965	0.869893	0.351201	0	0	phosphatidylinositol-4,5-bisphosphate 3-kinase, catalytic subunit gamma [Source:ZFIN;Acc:ZDB-GENE-040426-2532]	GO:0000166(nucleotide binding);GO:0005524(ATP binding);GO:0005737(cytoplasm);GO:0005886(plasma membrane);GO:0005942(phosphatidylinositol 3-kinase complex);GO:0006468(protein phosphorylation);GO:0014065(phosphatidylinositol 3-kinase signaling);GO:0016020(membrane);GO:0016301(kinase activity);GO:0016303(1-phosphatidylinositol-3-kinase activity);GO:0016310(phosphorylation);GO:0016477(cell migration)…	00562(Inositol phosphate metabolism);04261(Adrenergic signaling in cardiomyocytes);04371(Apelin signaling pathway)	K21289	EC:2.7.1.153
0	ENSDARG00000079387	si:ch211-102c2.4	1.69445	1.32867	0.350841	0	0	si:ch211-102c2.4 [Source:ZFIN;Acc:ZDB-GENE-030131-8862]	GO:0016020(membrane);GO:0016021(integral component of membrane)	NA	NA	NA
0	ENSDARG00000016200	trib3	1.41276	1.10799	0.350567	0	0	tribbles pseudokinase 3 [Source:ZFIN;Acc:ZDB-GENE-040426-2609]	GO:0001947(heart looping);GO:0003714(transcription corepressor activity);GO:0004672(protein kinase activity);GO:0005524(ATP binding);GO:0005634(nucleus);GO:0006468(protein phosphorylation);GO:0007368(determination of left/right symmetry);GO:0031434(mitogen-activated protein kinase kinase binding);GO:0032436(positive regulation of proteasomal ubiquitin-dependent protein catabolic process);GO:00434…	NA	K19518	NA
0	ENSDARG00000067713	snx18a	0.856039	0.671418	0.350465	0	0	sorting nexin 18a [Source:NCBI gene;Acc:562372]	GO:0000278(mitotic cell cycle);GO:0005515(protein binding);GO:0015031(protein transport);GO:0016020(membrane);GO:0030659(cytoplasmic vesicle membrane);GO:0031410(cytoplasmic vesicle);GO:0035091(phosphatidylinositol binding)	NA	K17923	NA
0	ENSDARG00000100499	cpeb4b	2.39415	1.88103	0.347993	0	0	cytoplasmic polyadenylation element binding protein 4b [Source:ZFIN;Acc:ZDB-GENE-170601-167]	GO:0000900(translation repressor activity, mRNA regulatory element binding);GO:0003676(nucleic acid binding);GO:0003723(RNA binding);GO:0003730(mRNA 3'-UTR binding);GO:0005634(nucleus);GO:0005737(cytoplasm);GO:0006412(translation);GO:0006417(regulation of translation);GO:0008135(translation factor activity, RNA binding);GO:0043005(neuron projection);GO:0043022(ribosome binding);GO:0045182(transla…	04114(Oocyte meiosis);04914(Progesterone-mediated oocyte maturation)	K02602	NA
0	ENSDARG00000012874	snap23.1	1.47452	1.15914	0.347181	0	0	synaptosomal-associated protein 23.1 [Source:ZFIN;Acc:ZDB-GENE-040426-883]	GO:0005484(SNAP receptor activity);GO:0005886(plasma membrane);GO:0006887(exocytosis);GO:0006906(vesicle fusion);GO:0016082(synaptic vesicle priming);GO:0019905(syntaxin binding);GO:0031201(SNARE complex);GO:0031629(synaptic vesicle fusion to presynaptic active zone membrane);GO:0045202(synapse);GO:0098793(presynapse)	04130(SNARE interactions in vesicular transport)	K08508	NA
0	ENSDARG00000070165	tnfrsf1b	0.772301	0.607526	0.346218	0	0	tumor necrosis factor receptor superfamily, member 1B [Source:ZFIN;Acc:ZDB-GENE-070410-133]	GO:0001944(vasculature development);GO:0004888(transmembrane signaling receptor activity);GO:0005515(protein binding);GO:0006915(apoptotic process);GO:0006955(immune response);GO:0007165(signal transduction);GO:0009615(response to virus);GO:0016020(membrane);GO:0016021(integral component of membrane);GO:0043281(regulation of cysteine-type endopeptidase activity involved in apoptotic process);GO:1…	04060(Cytokine-cytokine receptor interaction);04920(Adipocytokine signaling pathway)	K05141	NA
0	ENSDARG00000096625	si:ch211-286b5.8	0.472455	0.371717	0.345971	0	0	si:ch211-286b5.8 [Source:ZFIN;Acc:ZDB-GENE-121214-73]	GO:0016020(membrane);GO:0016021(integral component of membrane)	NA	NA	NA
0	ENSDARG00000026845	rhoaa	2.70695	2.13086	0.345232	0	0	ras homolog gene family, member Aa [Source:ZFIN;Acc:ZDB-GENE-040426-2150]	GO:0000166(nucleotide binding);GO:0003924(GTPase activity);GO:0005525(GTP binding);GO:0005622(intracellular);GO:0005737(cytoplasm);GO:0005886(plasma membrane);GO:0005938(cell cortex);GO:0007015(actin filament organization);GO:0007264(small GTPase mediated signal transduction);GO:0007266(Rho protein signal transduction);GO:0008360(regulation of cell shape);GO:0016020(membrane);GO:0016477(cell migr…	04144(Endocytosis);04150(mTOR signaling pathway);04270(Vascular smooth muscle contraction);04310(Wnt signaling pathway);04350(TGF-beta signaling pathway);04510(Focal adhesion);04520(Adherens junction);04530(Tight junction);04621(NOD-like receptor signaling pathway);04625(C-type lectin receptor signaling pathway);04810(Regulation of actin cytoskeleton)	K04513	NA
0	ENSDARG00000002533	adora2b	0.608852	0.479405	0.344847	0	0	adenosine A2b receptor [Source:ZFIN;Acc:ZDB-GENE-060511-1]	GO:0001609(G protein-coupled adenosine receptor activity);GO:0001973(adenosine receptor signaling pathway);GO:0004930(G protein-coupled receptor activity);GO:0005886(plasma membrane);GO:0007165(signal transduction);GO:0007186(G protein-coupled receptor signaling pathway);GO:0016020(membrane);GO:0016021(integral component of membrane);GO:0098508(endothelial to hematopoietic transition);GO:1901532(…	04020(Calcium signaling pathway);04080(Neuroactive ligand-receptor interaction);04270(Vascular smooth muscle contraction)	K04267	NA
0	ENSDARG00000056026	tprg1	0.970745	0.765294	0.343078	0	0	tumor protein p63 regulated 1 [Source:ZFIN;Acc:ZDB-GENE-070410-113]	GO:0005575(cellular_component);GO:0005737(cytoplasm)	NA	NA	NA
0	ENSDARG00000006491	agpat9l	0.570246	0.450086	0.341383	0	0	1-acylglycerol-3-phosphate O-acyltransferase 9, like [Source:ZFIN;Acc:ZDB-GENE-060531-19]	GO:0003841(1-acylglycerol-3-phosphate O-acyltransferase activity);GO:0004366(glycerol-3-phosphate O-acyltransferase activity);GO:0005783(endoplasmic reticulum);GO:0005789(endoplasmic reticulum membrane);GO:0006629(lipid metabolic process);GO:0008654(phospholipid biosynthetic process);GO:0016020(membrane);GO:0016021(integral component of membrane);GO:0016024(CDP-diacylglycerol biosynthetic process…	00561(Glycerolipid metabolism);00564(Glycerophospholipid metabolism)	K13506	EC:2.3.1.15
0	ENSDARG00000101794	atp6v0e1	2.66664	2.10726	0.33966	0	0	ATPase H+ transporting V0 subunit e1 [Source:ZFIN;Acc:ZDB-GENE-041010-133]	GO:0002181(cytoplasmic translation);GO:0003723(RNA binding);GO:0003735(structural constituent of ribosome);GO:0005622(intracellular);GO:0005840(ribosome);GO:0006412(translation);GO:0006811(ion transport);GO:0007634(optokinetic behavior);GO:0015078(proton transmembrane transporter activity);GO:0015934(large ribosomal subunit);GO:0015991(ATP hydrolysis coupled proton transport);GO:0016020(membrane)…	00190(Oxidative phosphorylation);04145(Phagosome)	K02153	NA
0	ENSDARG00000028957	maff	2.01648	1.59482	0.338449	0	0	v-maf avian musculoaponeurotic fibrosarcoma oncogene homolog F [Source:ZFIN;Acc:ZDB-GENE-040426-1280]	GO:0000978(RNA polymerase II proximal promoter sequence-specific DNA binding);GO:0003677(DNA binding);GO:0003700(DNA-binding transcription factor activity);GO:0005634(nucleus);GO:0005667(transcription factor complex);GO:0006355(regulation of transcription, DNA-templated);GO:0043565(sequence-specific DNA binding);GO:0045604(regulation of epidermal cell differentiation);GO:0045893(positive regulati…	NA	NA	NA
0	ENSDARG00000019998	slc30a7	0.973049	0.770402	0.336901	0	0	solute carrier family 30 (zinc transporter), member 7 [Source:ZFIN;Acc:ZDB-GENE-030131-5650]	GO:0005385(zinc ion transmembrane transporter activity);GO:0005794(Golgi apparatus);GO:0006811(ion transport);GO:0006812(cation transport);GO:0006829(zinc ion transport);GO:0008324(cation transmembrane transporter activity);GO:0016020(membrane);GO:0016021(integral component of membrane);GO:0055085(transmembrane transport);GO:0071577(zinc ion transmembrane transport);GO:0098655(cation transmembran…	NA	K14692	NA
0	ENSDARG00000045277	rdh12l	0.907675	0.719267	0.335648	0	0	retinol dehydrogenase 12, like [Source:ZFIN;Acc:ZDB-GENE-040801-48]	GO:0005575(cellular_component)	NA	NA	NA
0	ENSDARG00000008867	rap1b	3.20054	2.53695	0.335221	0	0	RAP1B, member of RAS oncogene family [Source:ZFIN;Acc:ZDB-GENE-030131-9662]	GO:0000165(MAPK cascade);GO:0000166(nucleotide binding);GO:0000187(activation of MAPK activity);GO:0001756(somitogenesis);GO:0003428(chondrocyte intercalation involved in growth plate cartilage morphogenesis);GO:0003924(GTPase activity);GO:0004708(MAP kinase kinase activity);GO:0005525(GTP binding);GO:0005737(cytoplasm);GO:0005829(cytosol);GO:0005886(plasma membrane);GO:0005911(cell-cell junction…	04010(MAPK signaling pathway);04510(Focal adhesion)	K07836	NA
0	ENSDARG00000044573	cdc42	1.56332	1.23948	0.334876	0	0	cell division cycle 42 [Source:ZFIN;Acc:ZDB-GENE-030131-8783]	GO:0000166(nucleotide binding);GO:0001822(kidney development);GO:0002040(sprouting angiogenesis);GO:0003924(GTPase activity);GO:0005515(protein binding);GO:0005525(GTP binding);GO:0005622(intracellular);GO:0005737(cytoplasm);GO:0005886(plasma membrane);GO:0005938(cell cortex);GO:0006897(endocytosis);GO:0007015(actin filament organization);GO:0007163(establishment or maintenance of cell polarity);…	04010(MAPK signaling pathway);04144(Endocytosis);04370(VEGF signaling pathway);04510(Focal adhesion);04520(Adherens junction);04530(Tight junction);04810(Regulation of actin cytoskeleton);04912(GnRH signaling pathway);04933(AGE-RAGE signaling pathway in diabetic complications);05132(Salmonella infection)	K04393	NA
0	ENSDARG00000036420	si:dkey-33c9.6	0.714685	0.566867	0.334296	0	0	si:dkey-33c9.6 [Source:ZFIN;Acc:ZDB-GENE-130530-592]	GO:0005089(Rho guanyl-nucleotide exchange factor activity);GO:0005096(GTPase activator activity);GO:0007165(signal transduction);GO:0035023(regulation of Rho protein signal transduction);GO:0043547(positive regulation of GTPase activity)	NA	NA	NA
0	ENSDARG00000102632	ubc	13.3424	10.5877	0.333621	0	0	ubiquitin C [Source:ZFIN;Acc:ZDB-GENE-061110-88]	GO:0003674(molecular_function);GO:0005515(protein binding);GO:0005634(nucleus);GO:0005737(cytoplasm);GO:0016567(protein ubiquitination);GO:0019941(modification-dependent protein catabolic process);GO:0031386(protein tag);GO:0031625(ubiquitin protein ligase binding)	03320(PPAR signaling pathway)	K08770	NA
0	ENSDARG00000013655	tpd52l2b	0.822204	0.652539	0.333432	0	0	tpd52 like 2b [Source:ZFIN;Acc:ZDB-GENE-030131-822]	NA	NA	NA	NA
0	ENSDARG00000032932	cnksr1	0.539818	0.42963	0.329379	0	0	connector enhancer of kinase suppressor of Ras 1 [Source:ZFIN;Acc:ZDB-GENE-040426-1802]	GO:0005515(protein binding);GO:0016301(kinase activity);GO:0016310(phosphorylation)	NA	NA	NA
0	ENSDARG00000016350	cap1	0.932205	0.7425	0.328256	0	0	CAP, adenylate cyclase-associated protein 1 (yeast) [Source:ZFIN;Acc:ZDB-GENE-030131-6459]	GO:0000902(cell morphogenesis);GO:0001756(somitogenesis);GO:0003779(actin binding);GO:0007010(cytoskeleton organization);GO:0007163(establishment or maintenance of cell polarity);GO:0007190(activation of adenylate cyclase activity);GO:0008078(mesodermal cell migration);GO:0008154(actin polymerization or depolymerization);GO:0008179(adenylate cyclase binding);GO:0030036(actin cytoskeleton organiza…	NA	K17261	NA
0	ENSDARG00000007691	cul1b	0.841152	0.670025	0.328152	0	0	cullin 1b [Source:ZFIN;Acc:ZDB-GENE-040426-2887]	GO:0006511(ubiquitin-dependent protein catabolic process);GO:0016567(protein ubiquitination);GO:0019005(SCF ubiquitin ligase complex);GO:0030593(neutrophil chemotaxis);GO:0031146(SCF-dependent proteasomal ubiquitin-dependent protein catabolic process);GO:0031461(cullin-RING ubiquitin ligase complex);GO:0031625(ubiquitin protein ligase binding);GO:0038061(NIK/NF-kappaB signaling);GO:0043161(protea…	04110(Cell cycle);04114(Oocyte meiosis);04120(Ubiquitin mediated proteolysis);04141(Protein processing in endoplasmic reticulum);04310(Wnt signaling pathway);04340(Hedgehog signaling pathway);04350(TGF-beta signaling pathway)	K03347	NA
0	ENSDARG00000036588	mhc1zba	4.6264	3.68542	0.328059	0	0	major histocompatibility complex class I ZBA [Source:ZFIN;Acc:ZDB-GENE-040426-2149]	GO:0016020(membrane);GO:0016021(integral component of membrane)	NA	NA	NA
0	ENSDARG00000009901	slc38a5a	1.34541	1.07213	0.327567	0	0	solute carrier family 38, member 5a [Source:ZFIN;Acc:ZDB-GENE-081105-92]	GO:0003333(amino acid transmembrane transport);GO:0005887(integral component of plasma membrane);GO:0015171(amino acid transmembrane transporter activity);GO:0016020(membrane);GO:0016021(integral component of membrane)	NA	K14992	NA
0	ENSDARG00000095273	cox8a	4.76373	3.79736	0.327096	0	0	cytochrome c oxidase subunit 8A [Source:ZFIN;Acc:ZDB-GENE-030131-9136]	GO:0004129(cytochrome-c oxidase activity);GO:0005739(mitochondrion);GO:0016020(membrane);GO:0016021(integral component of membrane);GO:0022900(electron transport chain);GO:0045277(respiratory chain complex IV);GO:1902600(proton transmembrane transport)	00190(Oxidative phosphorylation);04260(Cardiac muscle contraction)	K02273	NA
0	ENSDARG00000005675	sec61a1l	1.1265	0.897996	0.327065	0	0	Sec61 translocon alpha 1 subunit, like [Source:ZFIN;Acc:ZDB-GENE-021016-2]	GO:0015031(protein transport);GO:0016020(membrane);GO:0016021(integral component of membrane)	03060(Protein export);04141(Protein processing in endoplasmic reticulum);04145(Phagosome)	K10956	NA
0	ENSDARG00000058062	magt1	1.47604	1.1769	0.326742	0	0	magnesium transporter 1 [Source:ZFIN;Acc:ZDB-GENE-030131-3667]	GO:0004579(dolichyl-diphosphooligosaccharide-protein glycotransferase activity);GO:0005783(endoplasmic reticulum);GO:0005789(endoplasmic reticulum membrane);GO:0005886(plasma membrane);GO:0008250(oligosaccharyltransferase complex);GO:0015693(magnesium ion transport);GO:0016020(membrane);GO:0016021(integral component of membrane);GO:0018279(protein N-linked glycosylation via asparagine)	NA	K19478	NA
0	ENSDARG00000043003	pcyt2	1.32429	1.05743	0.324659	0	0	phosphate cytidylyltransferase 2, ethanolamine [Source:ZFIN;Acc:ZDB-GENE-041010-132]	GO:0003824(catalytic activity);GO:0005575(cellular_component);GO:0009058(biosynthetic process)	00440(Phosphonate and phosphinate metabolism);00564(Glycerophospholipid metabolism)	K00967	EC:2.7.7.14
0	ENSDARG00000093019	si:dkey-83k24.5	0.570394	0.455693	0.323898	0	0	si:dkey-83k24.5 [Source:ZFIN;Acc:ZDB-GENE-081104-440]	GO:0000139(Golgi membrane);GO:0015165(pyrimidine nucleotide-sugar transmembrane transporter activity);GO:0016020(membrane);GO:0016021(integral component of membrane);GO:0090481(pyrimidine nucleotide-sugar transmembrane transport)	NA	NA	NA
0	ENSDARG00000006314	itgav	0.766453	0.613193	0.321856	0	0	integrin, alpha V [Source:ZFIN;Acc:ZDB-GENE-060616-382]	GO:0001525(angiogenesis);GO:0001568(blood vessel development);GO:0001935(endothelial cell proliferation);GO:0005515(protein binding);GO:0007155(cell adhesion);GO:0007229(integrin-mediated signaling pathway);GO:0008305(integrin complex);GO:0016020(membrane);GO:0016021(integral component of membrane);GO:0016477(cell migration);GO:0042074(cell migration involved in gastrulation);GO:0070121(Kupffer's…	04145(Phagosome);04510(Focal adhesion);04512(ECM-receptor interaction);04514(Cell adhesion molecules (CAMs));04810(Regulation of actin cytoskeleton)	K06487	NA
0	ENSDARG00000044760	gnaia	1.41531	1.13361	0.3202	0	0	guanine nucleotide binding protein (G protein), alpha inhibiting activity polypeptide a [Source:ZFIN;Acc:ZDB-GENE-030131-2229]	GO:0000166(nucleotide binding);GO:0001664(G protein-coupled receptor binding);GO:0003924(GTPase activity);GO:0005525(GTP binding);GO:0005834(heterotrimeric G-protein complex);GO:0007165(signal transduction);GO:0007186(G protein-coupled receptor signaling pathway);GO:0007188(adenylate cyclase-modulating G protein-coupled receptor signaling pathway);GO:0019001(guanyl nucleotide binding);GO:0031683(…	04261(Adrenergic signaling in cardiomyocytes);04371(Apelin signaling pathway);04540(Gap junction);04914(Progesterone-mediated oocyte maturation);04916(Melanogenesis)	K04630	NA
0	ENSDARG00000013881	pi4k2b	0.859162	0.688256	0.319985	0	0	phosphatidylinositol 4-kinase type 2 beta [Source:ZFIN;Acc:ZDB-GENE-070112-990]	GO:0004430(1-phosphatidylinositol 4-kinase activity);GO:0046854(phosphatidylinositol phosphorylation)	00562(Inositol phosphate metabolism);04070(Phosphatidylinositol signaling system)	K13711	EC:2.7.1.67
0	ENSDARG00000097478	qkia	1.79382	1.43741	0.319561	0	0	QKI, KH domain containing, RNA binding a [Source:ZFIN;Acc:ZDB-GENE-990415-230]	GO:0003676(nucleic acid binding);GO:0003723(RNA binding)	NA	NA	NA
0	ENSDARG00000070065	si:ch211-163c2.2	0.468546	0.37559	0.319031	0	0	si:ch211-163c2.2 [Source:ZFIN;Acc:ZDB-GENE-160114-56]	GO:0016020(membrane);GO:0016021(integral component of membrane)	NA	NA	NA
0	ENSDARG00000004378	yrk	0.985508	0.790661	0.317809	0	0	Yes-related kinase [Source:ZFIN;Acc:ZDB-GENE-030131-9517]	GO:0000166(nucleotide binding);GO:0004672(protein kinase activity);GO:0004713(protein tyrosine kinase activity);GO:0004715(non-membrane spanning protein tyrosine kinase activity);GO:0005102(signaling receptor binding);GO:0005515(protein binding);GO:0005524(ATP binding);GO:0006468(protein phosphorylation);GO:0007169(transmembrane receptor protein tyrosine kinase signaling pathway);GO:0016301(kinas…	NA	K17511	EC:2.7.10.2
0	ENSDARG00000015149	wasa	1.67038	1.34014	0.317792	0	0	Wiskott-Aldrich syndrome (eczema-thrombocytopenia) a [Source:ZFIN;Acc:ZDB-GENE-081104-419]	GO:0000147(actin cortical patch assembly);GO:0003779(actin binding);GO:0005884(actin filament);GO:0006897(endocytosis);GO:0007015(actin filament organization);GO:0030048(actin filament-based movement);GO:0030479(actin cortical patch);GO:0051015(actin filament binding);GO:0051127(positive regulation of actin nucleation);GO:0051666(actin cortical patch localization);GO:2000601(positive regulation o…	04144(Endocytosis);04520(Adherens junction);04530(Tight junction);04810(Regulation of actin cytoskeleton);05132(Salmonella infection)	K05747	NA
0	ENSDARG00000014159	mtdha	2.4822	1.9915	0.317765	0	0	metadherin a [Source:ZFIN;Acc:ZDB-GENE-030616-615]	GO:0016020(membrane);GO:0016021(integral component of membrane);GO:0043066(negative regulation of apoptotic process);GO:0043123(positive regulation of I-kappaB kinase/NF-kappaB signaling);GO:0045766(positive regulation of angiogenesis)	NA	NA	NA
0	ENSDARG00000037967	si:dkey-16l2.16	0.733153	0.588311	0.317535	0	0	si:dkey-16l2.16 [Source:ZFIN;Acc:ZDB-GENE-141219-36]	GO:0000139(Golgi membrane);GO:0003924(GTPase activity);GO:0005525(GTP binding);GO:0005886(plasma membrane);GO:0006886(intracellular protein transport);GO:0010008(endosome membrane);GO:0032456(endocytic recycling);GO:0032482(Rab protein signal transduction)	NA	NA	NA
0	ENSDARG00000024209	wasf2	1.1028	0.88503	0.317367	0	0	WAS protein family, member 2 [Source:ZFIN;Acc:ZDB-GENE-040426-865]	GO:0003779(actin binding);GO:0005856(cytoskeleton);GO:0030036(actin cytoskeleton organization)	04520(Adherens junction);04810(Regulation of actin cytoskeleton);05132(Salmonella infection)	K05748	NA
0	ENSDARG00000023868	si:dkey-172h23.2	1.51702	1.21808	0.316625	0	0	si:dkey-172h23.2 [Source:ZFIN;Acc:ZDB-GENE-141212-258]	GO:0004691(cAMP-dependent protein kinase activity);GO:0005089(Rho guanyl-nucleotide exchange factor activity);GO:0005575(cellular_component);GO:0006468(protein phosphorylation);GO:0035023(regulation of Rho protein signal transduction);GO:0035556(intracellular signal transduction);GO:0046872(metal ion binding)	NA	K16529	NA
0	ENSDARG00000098722	si:ch73-170d6.3	0.508366	0.408224	0.316506	0	0	si:ch73-170d6.3 [Source:ZFIN;Acc:ZDB-GENE-161017-62]	GO:0016020(membrane);GO:0016021(integral component of membrane)	NA	NA	NA
0	ENSDARG00000019702	aldocb	3.76323	3.02678	0.314187	0	0	aldolase C, fructose-bisphosphate, b [Source:ZFIN;Acc:ZDB-GENE-030821-1]	GO:0003824(catalytic activity);GO:0004332(fructose-bisphosphate aldolase activity);GO:0005575(cellular_component);GO:0006096(glycolytic process);GO:0016829(lyase activity)	00010(Glycolysis / Gluconeogenesis);00030(Pentose phosphate pathway);00051(Fructose and mannose metabolism)	K01623	EC:4.1.2.13
0	ENSDARG00000038687	nfkb2	2.65445	2.13629	0.313306	0	0	nuclear factor of kappa light polypeptide gene enhancer in B-cells 2 (p49/p100) [Source:ZFIN;Acc:ZDB-GENE-030131-6701]	GO:0001525(angiogenesis);GO:0003677(DNA binding);GO:0003700(DNA-binding transcription factor activity);GO:0005515(protein binding);GO:0005634(nucleus);GO:0005737(cytoplasm);GO:0006355(regulation of transcription, DNA-templated);GO:0007165(signal transduction)	04010(MAPK signaling pathway);04625(C-type lectin receptor signaling pathway)	K04469	NA
0	ENSDARG00000037554	arhgef3l	0.706091	0.568318	0.313154	0	0	Rho guanine nucleotide exchange factor (GEF) 3, like [Source:ZFIN;Acc:ZDB-GENE-050522-85]	GO:0005085(guanyl-nucleotide exchange factor activity);GO:0005089(Rho guanyl-nucleotide exchange factor activity);GO:0035023(regulation of Rho protein signal transduction);GO:0035556(intracellular signal transduction)	NA	NA	NA
0	ENSDARG00000101849	adipor2	2.18866	1.76229	0.312594	0	0	adiponectin receptor 2 [Source:ZFIN;Acc:ZDB-GENE-041210-60]	GO:0005886(plasma membrane);GO:0016020(membrane);GO:0016021(integral component of membrane);GO:0033211(adiponectin-activated signaling pathway);GO:0038023(signaling receptor activity)	04920(Adipocytokine signaling pathway)	K07297	NA
0	ENSDARG00000104018	mtpn	2.35737	1.89888	0.312026	0	0	myotrophin [Source:ZFIN;Acc:ZDB-GENE-040426-2166]	GO:0005515(protein binding);GO:0005634(nucleus);GO:0005737(cytoplasm);GO:0048471(perinuclear region of cytoplasm)	NA	NA	NA
0	ENSDARG00000004017	spag1a	0.859368	0.692249	0.311985	0	0	sperm associated antigen 1a [Source:ZFIN;Acc:ZDB-GENE-030131-9443]	GO:0005515(protein binding);GO:0005737(cytoplasm);GO:0070286(axonemal dynein complex assembly)	NA	K19870	NA
0	ENSDARG00000056623	ptenb	0.940857	0.757928	0.311915	0	0	phosphatase and tensin homolog B [Source:ZFIN;Acc:ZDB-GENE-030616-47]	GO:0001568(blood vessel development);GO:0002275(myeloid cell activation involved in immune response);GO:0004438(phosphatidylinositol-3-phosphatase activity);GO:0004721(phosphoprotein phosphatase activity);GO:0004725(protein tyrosine phosphatase activity);GO:0005634(nucleus);GO:0005737(cytoplasm);GO:0006470(protein dephosphorylation);GO:0006629(lipid metabolic process);GO:0007399(nervous system de…	00562(Inositol phosphate metabolism);04068(FoxO signaling pathway);04070(Phosphatidylinositol signaling system);04115(p53 signaling pathway);04140(Autophagy - animal);04150(mTOR signaling pathway);04218(Cellular senescence);04510(Focal adhesion)	K01110	3.1.3.48;3.1.3.67;EC:3.1.3.16
0	ENSDARG00000010255	bin2b	0.930319	0.749669	0.311473	0	0	bridging integrator 2b [Source:ZFIN;Acc:ZDB-GENE-030131-5598]	GO:0001891(phagocytic cup);GO:0002102(podosome);GO:0005515(protein binding);GO:0005543(phospholipid binding);GO:0005737(cytoplasm);GO:0005886(plasma membrane);GO:0006911(phagocytosis, engulfment);GO:0071800(podosome assembly);GO:0097320(plasma membrane tubulation)	NA	K20119	NA
0	ENSDARG00000029170	si:ch211-200p22.4	0.717706	0.578451	0.311198	0	0	si:ch211-200p22.4 [Source:ZFIN;Acc:ZDB-GENE-081104-61]	GO:0000149(SNARE binding);GO:0005543(phospholipid binding);GO:0005545(1-phosphatidylinositol binding);GO:0005546(phosphatidylinositol-4,5-bisphosphate binding);GO:0005886(plasma membrane);GO:0005905(clathrin-coated pit);GO:0006897(endocytosis);GO:0006900(vesicle budding from membrane);GO:0008021(synaptic vesicle);GO:0016185(synaptic vesicle budding from presynaptic endocytic zone membrane);GO:003…	NA	NA	NA
0	ENSDARG00000045836	mapk11	0.658709	0.531073	0.310731	0	0	mitogen-activated protein kinase 11 [Source:ZFIN;Acc:ZDB-GENE-040625-75]	GO:0000165(MAPK cascade);GO:0000166(nucleotide binding);GO:0004672(protein kinase activity);GO:0004674(protein serine/threonine kinase activity);GO:0004707(MAP kinase activity);GO:0005524(ATP binding);GO:0005634(nucleus);GO:0005737(cytoplasm);GO:0006468(protein phosphorylation);GO:0010468(regulation of gene expression);GO:0016301(kinase activity);GO:0016310(phosphorylation);GO:0016740(transferase…	04010(MAPK signaling pathway);04068(FoxO signaling pathway);04218(Cellular senescence);04261(Adrenergic signaling in cardiomyocytes);04370(VEGF signaling pathway);04620(Toll-like receptor signaling pathway);04621(NOD-like receptor signaling pathway);04622(RIG-I-like receptor signaling pathway);04625(C-type lectin receptor signaling pathway);04912(GnRH signaling pathway);04914(Progesterone-mediate…	K04441	EC:2.7.11.24
0	ENSDARG00000069953	kcnq5b	0.564126	0.454911	0.310433	0	0	potassium voltage-gated channel, KQT-like subfamily, member 5b [Source:ZFIN;Acc:ZDB-GENE-090312-178]	GO:0005216(ion channel activity);GO:0005249(voltage-gated potassium channel activity);GO:0005251(delayed rectifier potassium channel activity);GO:0005267(potassium channel activity);GO:0005516(calmodulin binding);GO:0006811(ion transport);GO:0006813(potassium ion transport);GO:0008076(voltage-gated potassium channel complex);GO:0016020(membrane);GO:0016021(integral component of membrane);GO:00550…	NA	NA	NA
0	ENSDARG00000069100	aldh9a1a.1	1.76958	1.42843	0.308983	0	0	aldehyde dehydrogenase 9 family, member A1a, tandem duplicate 1 [Source:ZFIN;Acc:ZDB-GENE-030131-1257]	GO:0004029(aldehyde dehydrogenase (NAD) activity);GO:0005737(cytoplasm);GO:0016491(oxidoreductase activity);GO:0016620(oxidoreductase activity, acting on the aldehyde or oxo group of donors, NAD or NADP as acceptor);GO:0019145(aminobutyraldehyde dehydrogenase activity);GO:0043878(glyceraldehyde-3-phosphate dehydrogenase (NAD+) (non-phosphorylating) activity);GO:0047105(4-trimethylammoniobutyralde…	00010(Glycolysis / Gluconeogenesis);00053(Ascorbate and aldarate metabolism);00071(Fatty acid degradation);00280(Valine, leucine and isoleucine degradation);00310(Lysine degradation);00330(Arginine and proline metabolism);00340(Histidine metabolism);00380(Tryptophan metabolism);00410(beta-Alanine metabolism);00561(Glycerolipid metabolism);00620(Pyruvate metabolism)	K00149	1.2.1.3;EC:1.2.1.47
0	ENSDARG00000076539	sc:d156	0.431643	0.34846	0.308843	0	0	sc:d156 [Source:ZFIN;Acc:ZDB-GENE-080303-5]	NA	NA	NA	NA
0	ENSDARG00000063905	mt-co1	42.3927	34.2236	0.308822	0	0	cytochrome c oxidase I, mitochondrial [Source:ZFIN;Acc:ZDB-GENE-011205-14]	GO:0004129(cytochrome-c oxidase activity);GO:0005739(mitochondrion);GO:0005743(mitochondrial inner membrane);GO:0005751(mitochondrial respiratory chain complex IV);GO:0006119(oxidative phosphorylation);GO:0006123(mitochondrial electron transport, cytochrome c to oxygen);GO:0009060(aerobic respiration);GO:0015990(electron transport coupled proton transport);GO:0016020(membrane);GO:0016021(integral…	00190(Oxidative phosphorylation);04260(Cardiac muscle contraction)	K02256	EC:1.9.3.1
0	ENSDARG00000098075	sh3bgrl3	1.60871	1.29963	0.307802	0	0	SH3 domain binding glutamate-rich protein like 3 [Source:ZFIN;Acc:ZDB-GENE-040426-1059]	GO:0005623(cell);GO:0009055(electron transfer activity);GO:0015035(protein disulfide oxidoreductase activity);GO:0022900(electron transport chain);GO:0045454(cell redox homeostasis);GO:0055114(oxidation-reduction process)	NA	NA	NA
0	ENSDARG00000033285	gsto2	0.766078	0.619191	0.307107	0	0	glutathione S-transferase omega 2 [Source:ZFIN;Acc:ZDB-GENE-041114-67]	GO:0004364(glutathione transferase activity);GO:0005515(protein binding);GO:0005737(cytoplasm);GO:0045174(glutathione dehydrogenase (ascorbate) activity);GO:0055114(oxidation-reduction process);GO:0098869(cellular oxidant detoxification)	00480(Glutathione metabolism);00980(Metabolism of xenobiotics by cytochrome P450);00982(Drug metabolism - cytochrome P450);00983(Drug metabolism - other enzymes)	K00799	EC:2.5.1.18
0	ENSDARG00000042370	ptafr	0.458819	0.370994	0.30653	0	0	platelet-activating factor receptor [Source:ZFIN;Acc:ZDB-GENE-131127-236]	GO:0004930(G protein-coupled receptor activity);GO:0004992(platelet activating factor receptor activity);GO:0006935(chemotaxis);GO:0007165(signal transduction);GO:0007186(G protein-coupled receptor signaling pathway);GO:0016020(membrane);GO:0016021(integral component of membrane);GO:0035589(G protein-coupled purinergic nucleotide receptor signaling pathway);GO:0045028(G protein-coupled purinergic…	04020(Calcium signaling pathway);04080(Neuroactive ligand-receptor interaction)	K04279	NA
0	ENSDARG00000090889	si:ch211-132p1.3	1.82284	1.47439	0.306073	0	0	si:ch211-132p1.3 [Source:ZFIN;Acc:ZDB-GENE-130530-1010]	NA	NA	NA	NA
0	ENSDARG00000063539	slc25a15a	0.483356	0.390962	0.306057	0	0	solute carrier family 25 (mitochondrial carrier; ornithine transporter) member 15a [Source:ZFIN;Acc:ZDB-GENE-070112-1072]	GO:0000064(L-ornithine transmembrane transporter activity);GO:0016020(membrane);GO:0016021(integral component of membrane);GO:0022857(transmembrane transporter activity);GO:1990575(mitochondrial L-ornithine transmembrane transport)	NA	K15101	NA
0	ENSDARG00000062060	gmeb1	0.789904	0.639116	0.305598	0	0	glucocorticoid modulatory element binding protein 1 [Source:ZFIN;Acc:ZDB-GENE-060503-35]	GO:0000978(RNA polymerase II proximal promoter sequence-specific DNA binding);GO:0003677(DNA binding);GO:0003713(transcription coactivator activity);GO:0005634(nucleus);GO:0006357(regulation of transcription by RNA polymerase II);GO:1903508(positive regulation of nucleic acid-templated transcription)	NA	NA	NA
0	ENSDARG00000058000	cep350	1.16361	0.941773	0.305162	0	0	centrosomal protein 350 [Source:ZFIN;Acc:ZDB-GENE-030131-6975]	GO:0005813(centrosome);GO:0008017(microtubule binding);GO:0034453(microtubule anchoring)	NA	K16768	NA
0	ENSDARG00000070545	top1l	2.16346	1.75273	0.303736	0	0	DNA topoisomerase I, like [Source:ZFIN;Acc:ZDB-GENE-060616-217]	GO:0003677(DNA binding);GO:0003916(DNA topoisomerase activity);GO:0003917(DNA topoisomerase type I activity);GO:0005694(chromosome);GO:0005730(nucleolus);GO:0006260(DNA replication);GO:0006265(DNA topological change);GO:0006338(chromatin remodeling);GO:0007059(chromosome segregation);GO:0016853(isomerase activity);GO:0031298(replication fork protection complex)	NA	K03163	EC:5.6.2.1
0	ENSDARG00000068708	ifrd1	2.21749	1.79676	0.303529	0	0	interferon-related developmental regulator 1 [Source:ZFIN;Acc:ZDB-GENE-030131-6132]	GO:0005575(cellular_component);GO:0005634(nucleus);GO:0008150(biological_process)	NA	NA	NA
0	ENSDARG00000068434	h3f3b.1.2	2.57293	2.08745	0.30167	0	0	H3 histone, family 3B.1 [Source:ZFIN;Acc:ZDB-GENE-050417-65]	GO:0000786(nucleosome);GO:0003677(DNA binding);GO:0005634(nucleus);GO:0005694(chromosome);GO:0031492(nucleosomal DNA binding);GO:0046982(protein heterodimerization activity)	NA	K11253	NA
0	ENSDARG00000101251	ldha	5.26031	4.27361	0.299692	0	0	lactate dehydrogenase A4 [Source:ZFIN;Acc:ZDB-GENE-991026-5]	GO:0001666(response to hypoxia);GO:0003824(catalytic activity);GO:0004459(L-lactate dehydrogenase activity);GO:0005737(cytoplasm);GO:0005975(carbohydrate metabolic process);GO:0016491(oxidoreductase activity);GO:0016616(oxidoreductase activity, acting on the CH-OH group of donors, NAD or NADP as acceptor);GO:0019752(carboxylic acid metabolic process);GO:0055114(oxidation-reduction process)	00010(Glycolysis / Gluconeogenesis);00270(Cysteine and methionine metabolism);00620(Pyruvate metabolism);00640(Propanoate metabolism)	K00016	EC:1.1.1.27
0	ENSDARG00000018898	zfand5a	1.54126	1.25399	0.297593	0	0	zinc finger, AN1-type domain 5a [Source:ZFIN;Acc:ZDB-GENE-040426-1979]	GO:0003677(DNA binding);GO:0008270(zinc ion binding);GO:0046872(metal ion binding)	NA	NA	NA
0	ENSDARG00000103118	cib1	1.23298	1.00344	0.2972	0	0	calcium and integrin binding 1 (calmyrin) [Source:ZFIN;Acc:ZDB-GENE-050417-170]	GO:0005509(calcium ion binding)	NA	NA	NA
0	ENSDARG00000008153	serinc5	1.14588	0.932602	0.297126	0	0	serine incorporator 5 [Source:ZFIN;Acc:ZDB-GENE-040426-2918]	GO:0002376(immune system process);GO:0005886(plasma membrane);GO:0006629(lipid metabolic process);GO:0006658(phosphatidylserine metabolic process);GO:0006665(sphingolipid metabolic process);GO:0008654(phospholipid biosynthetic process);GO:0009597(detection of virus);GO:0016020(membrane);GO:0016021(integral component of membrane);GO:0042552(myelination);GO:0045087(innate immune response);GO:005160…	NA	NA	NA
0	ENSDARG00000087832	bcl3	0.568828	0.463088	0.296706	0	0	BCL3, transcription coactivator [Source:ZFIN;Acc:ZDB-GENE-061013-1]	GO:0005515(protein binding);GO:0048545(response to steroid hormone)	04625(C-type lectin receptor signaling pathway)	K09258	NA
0	ENSDARG00000075253	pik3cb	0.808428	0.658153	0.296695	0	0	phosphatidylinositol-4,5-bisphosphate 3-kinase, catalytic subunit beta [Source:ZFIN;Acc:ZDB-GENE-030131-1904]	GO:0000166(nucleotide binding);GO:0005524(ATP binding);GO:0005737(cytoplasm);GO:0005886(plasma membrane);GO:0005942(phosphatidylinositol 3-kinase complex);GO:0006468(protein phosphorylation);GO:0014065(phosphatidylinositol 3-kinase signaling);GO:0016020(membrane);GO:0016301(kinase activity);GO:0016303(1-phosphatidylinositol-3-kinase activity);GO:0016310(phosphorylation);GO:0016477(cell migration)…	00562(Inositol phosphate metabolism);04012(ErbB signaling pathway);04068(FoxO signaling pathway);04070(Phosphatidylinositol signaling system);04140(Autophagy - animal);04150(mTOR signaling pathway);04210(Apoptosis);04218(Cellular senescence);04370(VEGF signaling pathway);04510(Focal adhesion);04620(Toll-like receptor signaling pathway);04625(C-type lectin receptor signaling pathway);04810(Regulat…	K00922	EC:2.7.1.153
0	ENSDARG00000078734	myo1f	0.687134	0.55942	0.296659	0	0	myosin IF [Source:ZFIN;Acc:ZDB-GENE-081104-506]	GO:0000166(nucleotide binding);GO:0003774(motor activity);GO:0003779(actin binding);GO:0005515(protein binding);GO:0005524(ATP binding);GO:0016459(myosin complex)	NA	K10356	NA
0	ENSDARG00000059410	ccr12b.1	0.517903	0.421667	0.296578	0	0	chemokine (C-C motif) receptor 12b, tandem duplicate 1 [Source:ZFIN;Acc:ZDB-GENE-090420-5]	GO:0004930(G protein-coupled receptor activity);GO:0004950(chemokine receptor activity);GO:0006935(chemotaxis);GO:0006955(immune response);GO:0007165(signal transduction);GO:0007186(G protein-coupled receptor signaling pathway);GO:0007204(positive regulation of cytosolic calcium ion concentration);GO:0009897(external side of plasma membrane);GO:0016020(membrane);GO:0016021(integral component of m…	NA	NA	NA
0	ENSDARG00000043555	tmem30ab	0.707202	0.576095	0.295816	0	0	transmembrane protein 30Ab [Source:ZFIN;Acc:ZDB-GENE-030131-5884]	GO:0003674(molecular_function);GO:0004012(phospholipid-translocating ATPase activity);GO:0005783(endoplasmic reticulum);GO:0005794(Golgi apparatus);GO:0005886(plasma membrane);GO:0015247(aminophospholipid transmembrane transporter activity);GO:0015914(phospholipid transport);GO:0015917(aminophospholipid transport);GO:0016020(membrane);GO:0016021(integral component of membrane);GO:0045332(phosphol…	NA	NA	NA
0	ENSDARG00000017741	g3bp1	1.73814	1.41594	0.295778	0	0	GTPase activating protein (SH3 domain) binding protein 1 [Source:ZFIN;Acc:ZDB-GENE-030131-7452]	GO:0003676(nucleic acid binding);GO:0003723(RNA binding);GO:0003729(mRNA binding);GO:0005829(cytosol);GO:1990904(ribonucleoprotein complex)	NA	K17265	3.6.4.13;EC:3.6.4.12
0	ENSDARG00000036541	rhbdf1a	0.932321	0.760055	0.294724	0	0	rhomboid 5 homolog 1a (Drosophila) [Source:ZFIN;Acc:ZDB-GENE-040704-75]	GO:0000139(Golgi membrane);GO:0004252(serine-type endopeptidase activity);GO:0005783(endoplasmic reticulum);GO:0005789(endoplasmic reticulum membrane);GO:0005794(Golgi apparatus);GO:0006508(proteolysis);GO:0008233(peptidase activity);GO:0008283(cell population proliferation);GO:0015031(protein transport);GO:0016020(membrane);GO:0016021(integral component of membrane);GO:0016477(cell migration);GO…	NA	NA	NA
0	ENSDARG00000098899	zmp:0000001082	0.573053	0.467466	0.293808	0	0	zmp:0000001082 [Source:ZFIN;Acc:ZDB-GENE-140106-42]	GO:0007155(cell adhesion);GO:0007229(integrin-mediated signaling pathway);GO:0008305(integrin complex);GO:0016020(membrane);GO:0016021(integral component of membrane)	04514(Cell adhesion molecules (CAMs));04810(Regulation of actin cytoskeleton)	K05718	NA
0	ENSDARG00000044755	si:dkeyp-87d8.8	0.594978	0.485449	0.293516	0	0	si:dkeyp-87d8.8 [Source:ZFIN;Acc:ZDB-GENE-041111-161]	GO:0008150(biological_process);GO:0008375(acetylglucosaminyltransferase activity);GO:0016020(membrane);GO:0016021(integral component of membrane)	NA	NA	NA
0	ENSDARG00000101785	laptm5	5.19211	4.24212	0.291535	0	0	lysosomal protein transmembrane 5 [Source:ZFIN;Acc:ZDB-GENE-170303-1]	GO:0016020(membrane);GO:0016021(integral component of membrane)	NA	NA	NA
0	ENSDARG00000046143	prkab1b	1.36505	1.11547	0.291306	0	0	protein kinase, AMP-activated, beta 1 non-catalytic subunit, b [Source:ZFIN;Acc:ZDB-GENE-030131-7172]	GO:0004679(AMP-activated protein kinase activity);GO:0005515(protein binding);GO:0005634(nucleus);GO:0005737(cytoplasm);GO:0006468(protein phosphorylation);GO:0016301(kinase activity);GO:0016310(phosphorylation);GO:0019901(protein kinase binding);GO:0031588(nucleotide-activated protein kinase complex)	04068(FoxO signaling pathway);04371(Apelin signaling pathway);04530(Tight junction);04910(Insulin signaling pathway);04920(Adipocytokine signaling pathway)	K07199	NA
0	ENSDARG00000101094	ATP11B	1.03954	0.850908	0.288876	0	0	si:dkey-211e20.10 [Source:ZFIN;Acc:ZDB-GENE-081031-13]	GO:0000166(nucleotide binding);GO:0000287(magnesium ion binding);GO:0004012(phospholipid-translocating ATPase activity);GO:0005524(ATP binding);GO:0005783(endoplasmic reticulum);GO:0005802(trans-Golgi network);GO:0005886(plasma membrane);GO:0015914(phospholipid transport);GO:0016020(membrane);GO:0016021(integral component of membrane);GO:0045332(phospholipid translocation);GO:0055037(recycling en…	NA	K01530	EC:7.6.2.1
0	ENSDARG00000031954	rbck1	0.726475	0.594796	0.288518	0	0	RanBP-type and C3HC4-type zinc finger containing 1 [Source:ZFIN;Acc:ZDB-GENE-040704-3]	GO:0005515(protein binding);GO:0016740(transferase activity);GO:0046872(metal ion binding);GO:0048701(embryonic cranial skeleton morphogenesis)	04217(Necroptosis);04621(NOD-like receptor signaling pathway)	K10630	EC:2.3.2.31
0	ENSDARG00000063068	syne1b	1.69116	1.38487	0.288268	0	0	spectrin repeat containing, nuclear envelope 1b [Source:ZFIN;Acc:ZDB-GENE-071218-4]	GO:0003779(actin binding);GO:0005515(protein binding);GO:0005635(nuclear envelope);GO:0005640(nuclear outer membrane);GO:0005737(cytoplasm);GO:0007097(nuclear migration);GO:0007507(heart development);GO:0016020(membrane);GO:0016021(integral component of membrane);GO:0034993(meiotic nuclear membrane microtubule tethering complex);GO:0051015(actin filament binding);GO:0051647(nucleus localization);…	NA	K19326	NA
0	ENSDARG00000079312	kmt2ca	1.37591	1.12778	0.286901	0	0	lysine (K)-specific methyltransferase 2Ca [Source:ZFIN;Acc:ZDB-GENE-080520-3]	GO:0003713(transcription coactivator activity);GO:0005515(protein binding);GO:0005634(nucleus);GO:0008168(methyltransferase activity);GO:0016740(transferase activity);GO:0018024(histone-lysine N-methyltransferase activity);GO:0032259(methylation);GO:0034968(histone lysine methylation);GO:0042393(histone binding);GO:0042800(histone methyltransferase activity (H3-K4 specific));GO:0044666(MLL3/4 com…	00310(Lysine degradation)	K09188	EC:2.1.1.43
0	ENSDARG00000067711	parvg	1.30088	1.0663	0.286869	0	0	parvin, gamma [Source:ZFIN;Acc:ZDB-GENE-070410-67]	GO:0003779(actin binding);GO:0005515(protein binding);GO:0005575(cellular_component);GO:0005737(cytoplasm);GO:0005925(focal adhesion);GO:0007155(cell adhesion);GO:0007163(establishment or maintenance of cell polarity);GO:0015629(actin cytoskeleton);GO:0030031(cell projection assembly);GO:0031532(actin cytoskeleton reorganization);GO:0034446(substrate adhesion-dependent cell spreading)	04510(Focal adhesion)	K06275	NA
0	ENSDARG00000060729	trim8b	1.39425	1.14316	0.286456	0	0	tripartite motif containing 8b [Source:ZFIN;Acc:ZDB-GENE-030131-4325]	GO:0005634(nucleus)	NA	NA	NA
0	ENSDARG00000029663	rab1ab	2.50828	2.06051	0.283695	0	0	RAB1A, member RAS oncogene family b [Source:ZFIN;Acc:ZDB-GENE-030616-564]	GO:0000045(autophagosome assembly);GO:0000139(Golgi membrane);GO:0003924(GTPase activity);GO:0005525(GTP binding);GO:0005789(endoplasmic reticulum membrane);GO:0006886(intracellular protein transport);GO:0006888(endoplasmic reticulum to Golgi vesicle-mediated transport);GO:0032482(Rab protein signal transduction)	NA	K07874	NA
0	ENSDARG00000090512	trim8a	0.55317	0.454552	0.28328	0	0	tripartite motif containing 8a [Source:ZFIN;Acc:ZDB-GENE-130107-1]	GO:0005634(nucleus)	NA	K12001	EC:2.3.2.27
0	ENSDARG00000013561	pgm1	0.630614	0.518296	0.282981	0	0	phosphoglucomutase 1 [Source:ZFIN;Acc:ZDB-GENE-040426-1245]	GO:0000287(magnesium ion binding);GO:0004614(phosphoglucomutase activity);GO:0005829(cytosol);GO:0005975(carbohydrate metabolic process);GO:0005978(glycogen biosynthetic process);GO:0006006(glucose metabolic process);GO:0016868(intramolecular transferase activity, phosphotransferases);GO:0019388(galactose catabolic process);GO:0046872(metal ion binding);GO:0071704(organic substance metabolic proc…	00010(Glycolysis / Gluconeogenesis);00030(Pentose phosphate pathway);00052(Galactose metabolism);00230(Purine metabolism);00500(Starch and sucrose metabolism);00520(Amino sugar and nucleotide sugar metabolism)	K01835	EC:5.4.2.2
0	ENSDARG00000040111	pi4kb	0.773837	0.636014	0.282971	0	0	phosphatidylinositol 4-kinase, catalytic, beta [Source:ZFIN;Acc:ZDB-GENE-061013-96]	GO:0000166(nucleotide binding);GO:0004430(1-phosphatidylinositol 4-kinase activity);GO:0005524(ATP binding);GO:0005737(cytoplasm);GO:0005739(mitochondrion);GO:0005741(mitochondrial outer membrane);GO:0005783(endoplasmic reticulum);GO:0012505(endomembrane system);GO:0016020(membrane);GO:0016301(kinase activity);GO:0016310(phosphorylation);GO:0016740(transferase activity);GO:0030867(rough endoplasm…	00562(Inositol phosphate metabolism);04070(Phosphatidylinositol signaling system)	K19801	EC:2.7.1.67
0	ENSDARG00000031819	eif4ebp2	1.29101	1.06171	0.282113	0	0	eukaryotic translation initiation factor 4E binding protein 2 [Source:ZFIN;Acc:ZDB-GENE-031118-83]	GO:0003743(translation initiation factor activity);GO:0005737(cytoplasm);GO:0006413(translational initiation);GO:0008190(eukaryotic initiation factor 4E binding);GO:0045947(negative regulation of translational initiation)	03013(RNA transport)	K18644	NA
0	ENSDARG00000098387	tmem176l.3a	1.09198	0.898128	0.281958	0	0	transmembrane protein 176l.3a [Source:ZFIN;Acc:ZDB-GENE-080829-13]	GO:0016020(membrane);GO:0016021(integral component of membrane)	NA	NA	NA
0	ENSDARG00000046148	tnfaip8l2b	0.80384	0.66139	0.281407	0	0	tumor necrosis factor, alpha-induced protein 8-like 2b [Source:ZFIN;Acc:ZDB-GENE-040426-1359]	GO:0002376(immune system process);GO:0005737(cytoplasm);GO:0042981(regulation of apoptotic process);GO:0045087(innate immune response)	NA	NA	NA
0	ENSDARG00000068992	hspa8	29.4379	24.2465	0.279902	0	0	heat shock protein 8 [Source:ZFIN;Acc:ZDB-GENE-990415-92]	GO:0000166(nucleotide binding);GO:0005524(ATP binding)	03040(Spliceosome);04010(MAPK signaling pathway);04141(Protein processing in endoplasmic reticulum);04144(Endocytosis)	K03283	NA
0	ENSDARG00000020573	ddx3xa	2.53979	2.09264	0.279387	0	0	DEAD-box helicase 3 X-linked a [Source:ZFIN;Acc:ZDB-GENE-030131-1565]	GO:0000166(nucleotide binding);GO:0003676(nucleic acid binding);GO:0004386(helicase activity);GO:0005524(ATP binding);GO:0016787(hydrolase activity)	04622(RIG-I-like receptor signaling pathway)	K11594	EC:3.6.4.13
0	ENSDARG00000020929	fam49ba	1.29754	1.06983	0.278398	0	0	family with sequence similarity 49 member Ba [Source:ZFIN;Acc:ZDB-GENE-030131-9537]	GO:0003674(molecular_function);GO:0005575(cellular_component);GO:0008150(biological_process)	NA	NA	NA
0	ENSDARG00000043795	arhgdia	4.09481	3.37635	0.27833	0	0	Rho GDP dissociation inhibitor (GDI) alpha [Source:ZFIN;Acc:ZDB-GENE-040426-2816]	GO:0005094(Rho GDP-dissociation inhibitor activity);GO:0005737(cytoplasm);GO:0005829(cytosol);GO:0007264(small GTPase mediated signal transduction);GO:0007266(Rho protein signal transduction);GO:0016020(membrane);GO:0048365(Rac GTPase binding);GO:0050790(regulation of catalytic activity)	NA	K12462	NA
0	ENSDARG00000099786	actn4	0.742759	0.61259	0.277972	0	0	actinin, alpha 4 [Source:ZFIN;Acc:ZDB-GENE-030131-940]	GO:0003779(actin binding);GO:0005509(calcium ion binding);GO:0005515(protein binding);GO:0005575(cellular_component)	04510(Focal adhesion);04520(Adherens junction);04530(Tight junction);04810(Regulation of actin cytoskeleton)	K05699	NA
0	ENSDARG00000026322	dhrs13a.1	0.560938	0.463535	0.275163	0	0	dehydrogenase/reductase (SDR family) member 13a, tandem duplicate 1 [Source:ZFIN;Acc:ZDB-GENE-041114-58]	GO:0005575(cellular_component)	NA	NA	NA
0	ENSDARG00000003517	impa1	0.696573	0.575761	0.274804	0	0	inositol monophosphatase 1 [Source:ZFIN;Acc:ZDB-GENE-040718-245]	GO:0006021(inositol biosynthetic process);GO:0007165(signal transduction);GO:0008934(inositol monophosphate 1-phosphatase activity);GO:0016787(hydrolase activity);GO:0046854(phosphatidylinositol phosphorylation);GO:0046855(inositol phosphate dephosphorylation);GO:0046872(metal ion binding);GO:0052832(inositol monophosphate 3-phosphatase activity);GO:0052833(inositol monophosphate 4-phosphatase ac…	00562(Inositol phosphate metabolism);04070(Phosphatidylinositol signaling system)	K01092	EC:3.1.3.25
0	ENSDARG00000029353	serpine2	0.789814	0.653034	0.274354	0	0	serpin peptidase inhibitor, clade E (nexin, plasminogen activator inhibitor type 1), member 2 [Source:ZFIN;Acc:ZDB-GENE-040426-848]	GO:0004867(serine-type endopeptidase inhibitor activity);GO:0005615(extracellular space);GO:0010951(negative regulation of endopeptidase activity)	NA	K16643	NA
0	ENSDARG00000000690	sypl2b	1.42582	1.17904	0.274178	0	0	synaptophysin-like 2b [Source:ZFIN;Acc:ZDB-GENE-050417-309]	GO:0008021(synaptic vesicle);GO:0016020(membrane);GO:0016021(integral component of membrane)	NA	NA	NA
0	ENSDARG00000086996	si:ch73-234b20.5	1.17466	0.97218	0.272947	0	0	si:ch73-234b20.5 [Source:ZFIN;Acc:ZDB-GENE-041008-183]	GO:0003674(molecular_function);GO:0016020(membrane);GO:0016021(integral component of membrane);GO:0016192(vesicle-mediated transport)	NA	NA	NA
0	ENSDARG00000055383	zgc:66160	1.08422	0.899566	0.269354	0	0	zgc:66160 [Source:ZFIN;Acc:ZDB-GENE-030131-5510]	GO:0003674(molecular_function);GO:0005575(cellular_component);GO:0008150(biological_process)	NA	NA	NA
0	ENSDARG00000099970	CR383676.1	317.994	264.394	0.266313	0	0	NA	NA	NA	NA	NA
0	ENSDARG00000102070	tbc1d10aa	0.774917	0.644356	0.266184	0	0	TBC1 domain family, member 10Aa [Source:ZFIN;Acc:ZDB-GENE-030131-4497]	GO:0005096(GTPase activator activity);GO:0005623(cell);GO:0006886(intracellular protein transport);GO:0017137(Rab GTPase binding);GO:0090630(activation of GTPase activity)	NA	K19944	NA
0	ENSDARG00000055225	dock8	0.913431	0.759564	0.266123	0	0	dedicator of cytokinesis 8 [Source:ZFIN;Acc:ZDB-GENE-060503-743]	GO:0005085(guanyl-nucleotide exchange factor activity);GO:0007264(small GTPase mediated signal transduction)	NA	K21852	NA
0	ENSDARG00000011545	arrb2b	1.05932	0.881948	0.264368	0	0	arrestin, beta 2b [Source:ZFIN;Acc:ZDB-GENE-040426-1332]	GO:0001919(regulation of receptor recycling);GO:0007165(signal transduction);GO:0007517(muscle organ development);GO:0008589(regulation of smoothened signaling pathway);GO:1900136(regulation of chemokine activity)	04010(MAPK signaling pathway);04144(Endocytosis);04340(Hedgehog signaling pathway)	K04439	NA
0	ENSDARG00000063924	mt-cyb	38.5563	32.1066	0.264098	0	0	cytochrome b, mitochondrial [Source:ZFIN;Acc:ZDB-GENE-011205-17]	GO:0005739(mitochondrion);GO:0005743(mitochondrial inner membrane);GO:0006122(mitochondrial electron transport, ubiquinol to cytochrome c);GO:0008121(ubiquinol-cytochrome-c reductase activity);GO:0009055(electron transfer activity);GO:0016020(membrane);GO:0016021(integral component of membrane);GO:0016491(oxidoreductase activity);GO:0022904(respiratory electron transport chain);GO:0045275(respira…	00190(Oxidative phosphorylation);04260(Cardiac muscle contraction)	K00412	NA
0	ENSDARG00000078775	RASA2	1.97341	1.64348	0.263934	0	0	RAS p21 protein activator 2 [Source:NCBI gene;Acc:100331895]	GO:0005096(GTPase activator activity);GO:0005543(phospholipid binding);GO:0007165(signal transduction);GO:0035556(intracellular signal transduction);GO:0043087(regulation of GTPase activity);GO:0043547(positive regulation of GTPase activity);GO:0046580(negative regulation of Ras protein signal transduction)	04010(MAPK signaling pathway)	K08053	NA
0	ENSDARG00000098589	cyb5a	0.603815	0.503112	0.263226	0	0	cytochrome b5 type A (microsomal) [Source:ZFIN;Acc:ZDB-GENE-040426-2148]	GO:0016020(membrane);GO:0016021(integral component of membrane);GO:0020037(heme binding);GO:0046872(metal ion binding);GO:0071466(cellular response to xenobiotic stimulus)	NA	NA	NA
0	ENSDARG00000045294	sh3glb1a	0.604648	0.503814	0.263204	0	0	SH3-domain GRB2-like endophilin B1a [Source:ZFIN;Acc:ZDB-GENE-050417-89]	GO:0005515(protein binding);GO:0005737(cytoplasm)	04140(Autophagy - animal);04144(Endocytosis)	K11248	NA
0	ENSDARG00000018534	slc6a9	0.725052	0.604764	0.261713	0	0	solute carrier family 6 (neurotransmitter transporter, glycine), member 9 [Source:ZFIN;Acc:ZDB-GENE-050105-3]	GO:0003333(amino acid transmembrane transport);GO:0005283(amino acid:sodium symporter activity);GO:0005328(neurotransmitter:sodium symporter activity);GO:0005886(plasma membrane);GO:0005887(integral component of plasma membrane);GO:0006836(neurotransmitter transport);GO:0007626(locomotory behavior);GO:0015187(glycine transmembrane transporter activity);GO:0015293(symporter activity);GO:0015816(gl…	NA	K05038	NA
0	ENSDARG00000011809	mical1	0.786722	0.629354	0.321982	0	0	microtubule associated monooxygenase, calponin and LIM domain containing 1 [Source:ZFIN;Acc:ZDB-GENE-081022-3]	GO:0003779(actin binding);GO:0004497(monooxygenase activity);GO:0005515(protein binding);GO:0005737(cytoplasm);GO:0005856(cytoskeleton);GO:0006887(exocytosis);GO:0016491(oxidoreductase activity);GO:0016709(oxidoreductase activity, acting on paired donors, with incorporation or reduction of molecular oxygen, NAD(P)H as one donor, and incorporation of one atom of oxygen);GO:0017137(Rab GTPase bindi…	NA	K19947	EC:1.14.13.225
0	ENSDARG00000000068	slc9a3r1a	0.795178	0.661711	0.265075	0	0	SLC9A3 regulator 1a [Source:ZFIN;Acc:ZDB-GENE-031006-7]	GO:0005515(protein binding);GO:0005886(plasma membrane);GO:0006612(protein targeting to membrane);GO:0012505(endomembrane system);GO:0016020(membrane);GO:0021591(ventricular system development);GO:0032947(protein-containing complex scaffold activity);GO:0043113(receptor clustering);GO:0055078(sodium ion homeostasis);GO:0071599(otic vesicle development)	04530(Tight junction)	K13365	NA
0	ENSDARG00000038728	ch25hl2	1.23927	0.948662	0.385522	0	0	cholesterol 25-hydroxylase like 2 [Source:ZFIN;Acc:ZDB-GENE-080204-82]	GO:0000254(C-4 methylsterol oxidase activity);GO:0004497(monooxygenase activity);GO:0005506(iron ion binding);GO:0005783(endoplasmic reticulum);GO:0005789(endoplasmic reticulum membrane);GO:0006629(lipid metabolic process);GO:0006694(steroid biosynthetic process);GO:0008202(steroid metabolic process);GO:0008203(cholesterol metabolic process);GO:0008395(steroid hydroxylase activity);GO:0008610(lip…	00120(Primary bile acid biosynthesis)	K10223	EC:1.14.99.38
0	ENSDARG00000005593	rxrga	0.834185	0.676033	0.303273	0	0	retinoid x receptor, gamma a [Source:ZFIN;Acc:ZDB-GENE-980526-36]	NA	03320(PPAR signaling pathway);04920(Adipocytokine signaling pathway)	K08524	NA
0	ENSDARG00000099973	mia2	0.90617	0.744573	0.283368	0	0	MIA SH3 domain ER export factor 2 [Source:ZFIN;Acc:ZDB-GENE-100618-1]	GO:0003674(molecular_function);GO:0008150(biological_process)	NA	NA	NA
0	ENSDARG00000037852	zgc:101663	0.661	0.520306	0.34529	0	0	zgc:101663 [Source:ZFIN;Acc:ZDB-GENE-041114-149]	GO:0000139(Golgi membrane);GO:0005794(Golgi apparatus);GO:0006486(protein glycosylation);GO:0008454(alpha-1,3-mannosylglycoprotein 4-beta-N-acetylglucosaminyltransferase activity);GO:0016020(membrane);GO:0016021(integral component of membrane);GO:0016740(transferase activity);GO:0016757(transferase activity, transferring glycosyl groups);GO:0046872(metal ion binding)	00510(N-Glycan biosynthesis)	K13748	2.4.1.145;EC:2.4.1.201
0	ENSDARG00000099730	pkma	5.1971	4.23665	0.294784	0	4.32757e-307	pyruvate kinase M1/2a [Source:ZFIN;Acc:ZDB-GENE-031201-4]	GO:0000287(magnesium ion binding);GO:0003824(catalytic activity);GO:0004743(pyruvate kinase activity);GO:0005737(cytoplasm);GO:0006096(glycolytic process);GO:0016301(kinase activity);GO:0016310(phosphorylation);GO:0016740(transferase activity);GO:0030955(potassium ion binding);GO:0032869(cellular response to insulin stimulus)	00010(Glycolysis / Gluconeogenesis);00230(Purine metabolism);00620(Pyruvate metabolism)	K00873	EC:2.7.1.40
0	ENSDARG00000031814	dhrs13b	0.442031	0.360417	0.294479	0	5.61406e-307	dehydrogenase/reductase (SDR family) member 13b [Source:ZFIN;Acc:ZDB-GENE-040801-253]	GO:0016020(membrane);GO:0016021(integral component of membrane)	NA	NA	NA
0	ENSDARG00000099195	ier2a	2.76446	2.24214	0.302121	0	2.2306e-305	immediate early response 2a [Source:ZFIN;Acc:ZDB-GENE-030131-9126]	NA	NA	NA	NA
0	ENSDARG00000030775	sybl1	0.802381	0.654752	0.293339	2.39859e-303	6.64698e-299	synaptobrevin-like 1 [Source:ZFIN;Acc:ZDB-GENE-040426-1055]	GO:0000149(SNARE binding);GO:0005484(SNAP receptor activity);GO:0006887(exocytosis);GO:0006906(vesicle fusion);GO:0008333(endosome to lysosome transport);GO:0016020(membrane);GO:0016021(integral component of membrane);GO:0016192(vesicle-mediated transport);GO:0031201(SNARE complex)	04130(SNARE interactions in vesicular transport)	K08515	NA
0	ENSDARG00000092115	eif4a1a	5.68405	4.59355	0.307311	8.72979e-294	2.4192e-289	eukaryotic translation initiation factor 4A1A [Source:ZFIN;Acc:ZDB-GENE-031030-2]	GO:0003676(nucleic acid binding);GO:0003743(translation initiation factor activity);GO:0004004(ATP-dependent RNA helicase activity);GO:0005524(ATP binding);GO:0006413(translational initiation)	03013(RNA transport)	K03257	NA
0	ENSDARG00000073718	si:ch73-233k15.2	0.586107	0.481998	0.282139	1.10381e-283	3.05889e-279	si:ch73-233k15.2 [Source:ZFIN;Acc:ZDB-GENE-120215-22]	GO:0005576(extracellular region);GO:0006869(lipid transport);GO:0008289(lipid binding);GO:0042157(lipoprotein metabolic process)	NA	K14480	NA
0	ENSDARG00000100184	BX908782.1	0.377433	0.312611	0.271852	3.60116e-279	9.97954e-275	CD59 glycoprotein-like [Source:NCBI gene;Acc:103910141]	GO:0001971(negative regulation of activation of membrane attack complex)	NA	NA	NA
0	ENSDARG00000043587	srd5a2a	0.713444	0.574259	0.313098	1.298e-278	3.59702e-274	steroid-5-alpha-reductase, alpha polypeptide 2a [Source:ZFIN;Acc:ZDB-GENE-050417-199]	GO:0003865(3-oxo-5-alpha-steroid 4-dehydrogenase activity);GO:0006629(lipid metabolic process);GO:0008202(steroid metabolic process);GO:0016020(membrane);GO:0016021(integral component of membrane);GO:0016491(oxidoreductase activity);GO:0016627(oxidoreductase activity, acting on the CH-CH group of donors);GO:0055114(oxidation-reduction process)	00140(Steroid hormone biosynthesis)	K12344	EC:1.3.1.22
0	ENSDARG00000003216	anxa2a	2.41932	1.87878	0.364805	3.78462e-277	1.04879e-272	annexin A2a [Source:ZFIN;Acc:ZDB-GENE-030131-4282]	GO:0004859(phospholipase inhibitor activity);GO:0005509(calcium ion binding);GO:0005544(calcium-dependent phospholipid binding);GO:0008092(cytoskeletal protein binding);GO:0043086(negative regulation of catalytic activity)	NA	K17092	NA
0	ENSDARG00000039970	cnr2	0.601683	0.492162	0.289871	2.18247e-276	6.04806e-272	cannabinoid receptor 2 [Source:ZFIN;Acc:ZDB-GENE-040702-7]	GO:0001889(liver development);GO:0004930(G protein-coupled receptor activity);GO:0004949(cannabinoid receptor activity);GO:0006555(methionine metabolic process);GO:0007165(signal transduction);GO:0007186(G protein-coupled receptor signaling pathway);GO:0016020(membrane);GO:0016021(integral component of membrane);GO:0030097(hemopoiesis);GO:0035701(hematopoietic stem cell migration);GO:0038171(cann…	04080(Neuroactive ligand-receptor interaction)	K04278	NA
0	ENSDARG00000025522	sgk1	2.28177	1.87014	0.287005	2.20108e-272	6.09963e-268	serum/glucocorticoid regulated kinase 1 [Source:ZFIN;Acc:ZDB-GENE-030131-2860]	GO:0000166(nucleotide binding);GO:0004672(protein kinase activity);GO:0004674(protein serine/threonine kinase activity);GO:0005524(ATP binding);GO:0005634(nucleus);GO:0005737(cytoplasm);GO:0005783(endoplasmic reticulum);GO:0006468(protein phosphorylation);GO:0006915(apoptotic process);GO:0006954(inflammatory response);GO:0015459(potassium channel regulator activity);GO:0016301(kinase activity);GO…	04068(FoxO signaling pathway);04150(mTOR signaling pathway)	K13302	EC:2.7.11.1
0	ENSDARG00000069379	zgc:158868	0.412917	0.3366	0.294817	1.23587e-270	3.42485e-266	zgc:158868 [Source:ZFIN;Acc:ZDB-GENE-070112-892]	GO:0005575(cellular_component)	NA	NA	NA
0	ENSDARG00000090625	si:ch73-248e21.1	2.32997	1.75815	0.406256	4.75559e-269	1.31787e-264	si:ch73-248e21.1 [Source:ZFIN;Acc:ZDB-GENE-120215-198]	NA	NA	NA	NA
0	ENSDARG00000103540	gpr132b	0.874202	0.729487	0.261084	3.48375e-266	9.65417e-262	G protein-coupled receptor 132b [Source:ZFIN;Acc:ZDB-GENE-040724-83]	GO:0004930(G protein-coupled receptor activity);GO:0007165(signal transduction);GO:0007186(G protein-coupled receptor signaling pathway);GO:0010447(response to acidic pH);GO:0016020(membrane);GO:0016021(integral component of membrane)	NA	K08426	NA
0	ENSDARG00000042332	plin2	1.22139	0.961946	0.344502	3.71308e-265	1.02897e-260	perilipin 2 [Source:ZFIN;Acc:ZDB-GENE-050913-12]	GO:0003674(molecular_function);GO:0005575(cellular_component);GO:0008150(biological_process)	03320(PPAR signaling pathway)	K17284	NA
0	ENSDARG00000070792	lrrc15	1.22154	0.98485	0.310724	7.06384e-259	1.95753e-254	leucine rich repeat containing 15 [Source:ZFIN;Acc:ZDB-GENE-031113-8]	GO:0005515(protein binding);GO:0016020(membrane);GO:0016021(integral component of membrane)	NA	NA	NA
0	ENSDARG00000096411	si:dkey-261j15.2	0.619705	0.510775	0.278894	4.11002e-258	1.13897e-253	si:dkey-261j15.2 [Source:ZFIN;Acc:ZDB-GENE-120215-69]	NA	NA	NA	NA
0	ENSDARG00000067672	card9	1.46734	1.15483	0.345525	4.26524e-257	1.18198e-252	caspase recruitment domain family, member 9 [Source:ZFIN;Acc:ZDB-GENE-060531-94]	GO:0042981(regulation of apoptotic process)	04621(NOD-like receptor signaling pathway);04625(C-type lectin receptor signaling pathway);05168(Herpes simplex virus 1 infection)	K12794	NA
0	ENSDARG00000053484	syne2b	0.692644	0.576869	0.263871	1.07201e-254	2.97077e-250	spectrin repeat containing, nuclear envelope 2b [Source:ZFIN;Acc:ZDB-GENE-071218-5]	GO:0003779(actin binding);GO:0005515(protein binding);GO:0005635(nuclear envelope);GO:0016020(membrane);GO:0016021(integral component of membrane);GO:0034993(meiotic nuclear membrane microtubule tethering complex);GO:0051015(actin filament binding);GO:0090286(cytoskeletal anchoring at nuclear membrane)	NA	NA	NA
0	ENSDARG00000061845	pld7	0.946764	0.78257	0.274784	3.30868e-254	9.16902e-250	phospholipase D family, member 7 [Source:ZFIN;Acc:ZDB-GENE-030219-75]	GO:0003824(catalytic activity);GO:0016020(membrane);GO:0016021(integral component of membrane)	NA	NA	NA
0	ENSDARG00000069433	tnk1	0.546082	0.446631	0.290035	1.72986e-247	4.79379e-243	tyrosine kinase, non-receptor, 1 [Source:ZFIN;Acc:ZDB-GENE-030131-7427]	GO:0000166(nucleotide binding);GO:0004672(protein kinase activity);GO:0004713(protein tyrosine kinase activity);GO:0004715(non-membrane spanning protein tyrosine kinase activity);GO:0005515(protein binding);GO:0005524(ATP binding);GO:0006468(protein phosphorylation);GO:0016301(kinase activity);GO:0016310(phosphorylation);GO:0016740(transferase activity);GO:0030154(cell differentiation);GO:0038083…	NA	K08252	EC:2.7.10.1
0	ENSDARG00000017446	camk1db	0.623908	0.510895	0.288308	1.13261e-245	3.13869e-241	calcium/calmodulin-dependent protein kinase 1Db [Source:ZFIN;Acc:ZDB-GENE-070112-1872]	GO:0000166(nucleotide binding);GO:0004672(protein kinase activity);GO:0004674(protein serine/threonine kinase activity);GO:0004683(calmodulin-dependent protein kinase activity);GO:0005516(calmodulin binding);GO:0005524(ATP binding);GO:0005829(cytosol);GO:0006468(protein phosphorylation);GO:0016301(kinase activity);GO:0016310(phosphorylation);GO:0043009(chordate embryonic development)	04020(Calcium signaling pathway)	K08794	EC:2.7.11.17
0	ENSDARG00000021113	ptmaa	12.008	9.64199	0.316592	1.71256e-241	4.74585e-237	prothymosin alpha a [Source:ZFIN;Acc:ZDB-GENE-030131-7647]	NA	NA	K13784	NA
0	ENSDARG00000104399	tppp	7.07848	3.4515	1.03622	5.44742e-227	1.50959e-222	tubulin polymerization promoting protein [Source:ZFIN;Acc:ZDB-GENE-101115-2]	NA	NA	NA	NA
0	ENSDARG00000075718	rpz5	1.24897	1.03435	0.272017	1.53003e-214	4.24002e-210	rapunzel 5 [Source:ZFIN;Acc:ZDB-GENE-030131-4678]	NA	NA	NA	NA
0	ENSDARG00000054058	h1fx	6.90271	5.284	0.385534	2.6746e-213	7.41185e-209	H1 histone family, member X [Source:ZFIN;Acc:ZDB-GENE-030131-1228]	GO:0000786(nucleosome);GO:0003677(DNA binding);GO:0003690(double-stranded DNA binding);GO:0005515(protein binding);GO:0005634(nucleus);GO:0005694(chromosome);GO:0005730(nucleolus);GO:0006334(nucleosome assembly);GO:0006355(regulation of transcription, DNA-templated);GO:0016584(nucleosome positioning);GO:0030261(chromosome condensation);GO:0031492(nucleosomal DNA binding);GO:0031936(negative regul…	NA	K11275	NA
0	ENSDARG00000101088	si:ch73-359m17.5	0.582422	0.456437	0.35165	7.53439e-213	2.08793e-208	si:ch73-359m17.5 [Source:ZFIN;Acc:ZDB-GENE-141212-366]	GO:0016020(membrane);GO:0016021(integral component of membrane)	NA	NA	NA
0	ENSDARG00000076858	TCIM (1 of many)	1.45969	1.01027	0.530916	2.80977e-212	7.78644e-208	transcriptional and immune response regulator b [Source:NCBI gene;Acc:558746]	GO:0002264(endothelial cell activation involved in immune response);GO:0005112(Notch binding);GO:0005634(nucleus);GO:0005829(cytosol);GO:0045746(negative regulation of Notch signaling pathway)	NA	NA	NA
0	ENSDARG00000099420	nme2b.2	0.542339	0.452286	0.26196	2.17682e-203	6.0324e-199	NME/NM23 nucleoside diphosphate kinase 2b, tandem duplicate 2 [Source:ZFIN;Acc:ZDB-GENE-000210-33]	GO:0000166(nucleotide binding);GO:0004550(nucleoside diphosphate kinase activity);GO:0005524(ATP binding);GO:0006165(nucleoside diphosphate phosphorylation);GO:0006183(GTP biosynthetic process);GO:0006228(UTP biosynthetic process);GO:0006241(CTP biosynthetic process);GO:0016301(kinase activity);GO:0016310(phosphorylation);GO:0016740(transferase activity)	00230(Purine metabolism);00240(Pyrimidine metabolism);00983(Drug metabolism - other enzymes)	K00940	EC:2.7.4.6
0	ENSDARG00000018971	b3gnt5a	0.949026	0.790475	0.263727	2.61831e-196	7.25587e-192	UDP-GlcNAc:betaGal beta-1,3-N-acetylglucosaminyltransferase 5a [Source:ZFIN;Acc:ZDB-GENE-030131-8470]	GO:0000139(Golgi membrane);GO:0005783(endoplasmic reticulum);GO:0005794(Golgi apparatus);GO:0006486(protein glycosylation);GO:0008376(acetylgalactosaminyltransferase activity);GO:0008378(galactosyltransferase activity);GO:0008532(N-acetyllactosaminide beta-1,3-N-acetylglucosaminyltransferase activity);GO:0016020(membrane);GO:0016021(integral component of membrane);GO:0016740(transferase activity)…	00601(Glycosphingolipid biosynthesis - lacto and neolacto series)	K03766	EC:2.4.1.206
0	ENSDARG00000052997	sema4e	0.595602	0.488565	0.285799	2.98549e-191	8.27339e-187	semaphorin 4e [Source:ZFIN;Acc:ZDB-GENE-990715-7]	GO:0005515(protein binding);GO:0016020(membrane);GO:0016021(integral component of membrane)	NA	NA	NA
0	ENSDARG00000038011	cyth4a	0.634698	0.523901	0.276776	1.47722e-181	4.09368e-177	cytohesin 4a [Source:ZFIN;Acc:ZDB-GENE-090624-6]	GO:0005086(ARF guanyl-nucleotide exchange factor activity);GO:0032012(regulation of ARF protein signal transduction);GO:0055113(epiboly involved in gastrulation with mouth forming second)	04144(Endocytosis)	K18441	NA
0	ENSDARG00000012395	mmp13a	0.627568	0.48819	0.36233	4.19704e-172	1.16308e-167	matrix metallopeptidase 13a [Source:ZFIN;Acc:ZDB-GENE-031202-2]	GO:0004222(metalloendopeptidase activity);GO:0005615(extracellular space);GO:0006508(proteolysis);GO:0008233(peptidase activity);GO:0008237(metallopeptidase activity);GO:0008270(zinc ion binding);GO:0016787(hydrolase activity);GO:0030198(extracellular matrix organization);GO:0030574(collagen catabolic process);GO:0031012(extracellular matrix);GO:0046872(metal ion binding);GO:0048246(macrophage ch…	NA	NA	NA
0	ENSDARG00000026726	anxa1a	1.62774	1.33301	0.288182	7.26857e-157	2.01427e-152	annexin A1a [Source:ZFIN;Acc:ZDB-GENE-030131-6664]	GO:0002548(monocyte chemotaxis);GO:0002685(regulation of leukocyte migration);GO:0003697(single-stranded DNA binding);GO:0003727(single-stranded RNA binding);GO:0004859(phospholipase inhibitor activity);GO:0005198(structural molecule activity);GO:0005509(calcium ion binding);GO:0005544(calcium-dependent phospholipid binding);GO:0005615(extracellular space);GO:0005886(plasma membrane);GO:0006909(p…	NA	K17091	NA
0	ENSDARG00000035715	marcksl1b	19.7787	14.9592	0.402913	5.50328e-142	1.52507e-137	MARCKS-like 1b [Source:ZFIN;Acc:ZDB-GENE-040426-2315]	GO:0003407(neural retina development);GO:0005516(calmodulin binding);GO:0005737(cytoplasm);GO:0005856(cytoskeleton);GO:0005886(plasma membrane);GO:0007417(central nervous system development);GO:0016020(membrane);GO:0051216(cartilage development)	NA	NA	NA
0	ENSDARG00000098752	csf3b	7.33613	5.31781	0.464188	1.37721e-138	3.81652e-134	colony stimulating factor 3 (granulocyte) b [Source:ZFIN;Acc:ZDB-GENE-141212-221]	GO:0005125(cytokine activity);GO:0010469(regulation of signaling receptor activity);GO:0030099(myeloid cell differentiation);GO:0030223(neutrophil differentiation);GO:0030225(macrophage differentiation);GO:0030593(neutrophil chemotaxis);GO:0045639(positive regulation of myeloid cell differentiation);GO:0060218(hematopoietic stem cell differentiation);GO:0061515(myeloid cell development);GO:007142…	NA	NA	NA
0	ENSDARG00000076914	lacc1	1.25504	1.01599	0.304846	1.53755e-79	4.26087e-75	laccase (multicopper oxidoreductase) domain containing 1 [Source:ZFIN;Acc:ZDB-GENE-081104-155]	GO:0005507(copper ion binding)	NA	K05810	EC:1.10.3.-
1	ENSDARG00000089362	grn1	29.0551	4.25315	2.77219	0	0	granulin 1 [Source:ZFIN;Acc:ZDB-GENE-060103-1]	GO:0008150(biological_process)	NA	NA	NA
1	ENSDARG00000025254	s100a10b	21.0195	4.18364	2.3289	0	0	S100 calcium binding protein A10b [Source:ZFIN;Acc:ZDB-GENE-040426-1937]	GO:0005509(calcium ion binding);GO:0005575(cellular_component);GO:0042127(regulation of cell population proliferation);GO:0046872(metal ion binding);GO:0048306(calcium-dependent protein binding)	NA	NA	NA
1	ENSDARG00000090873	ccl34a.4	9.25405	1.94475	2.2505	0	0	chemokine (C-C motif) ligand 34a, duplicate 4 [Source:ZFIN;Acc:ZDB-GENE-070912-32]	GO:0005576(extracellular region);GO:0006955(immune response);GO:0008009(chemokine activity);GO:0060326(cell chemotaxis)	NA	NA	NA
1	ENSDARG00000028618	krt18b	15.2933	3.50854	2.12395	0	0	keratin 18b [Source:ZFIN;Acc:ZDB-GENE-040426-1508]	GO:0005198(structural molecule activity);GO:0005882(intermediate filament);GO:0008150(biological_process)	NA	NA	NA
1	ENSDARG00000019861	fgl2a	8.02439	1.86788	2.10299	0	0	fibrinogen-like 2a [Source:ZFIN;Acc:ZDB-GENE-030131-9506]	GO:0006508(proteolysis);GO:0008233(peptidase activity)	NA	NA	NA
1	ENSDARG00000059294	marco	7.36487	1.74598	2.07662	0	0	macrophage receptor with collagenous structure [Source:ZFIN;Acc:ZDB-GENE-120514-2]	GO:0005044(scavenger receptor activity);GO:0005201(extracellular matrix structural constituent);GO:0005615(extracellular space);GO:0006898(receptor-mediated endocytosis);GO:0006909(phagocytosis);GO:0016020(membrane);GO:0016021(integral component of membrane);GO:0030198(extracellular matrix organization);GO:0031012(extracellular matrix);GO:0042742(defense response to bacterium)	04145(Phagosome)	K13884	NA
1	ENSDARG00000040528	lgals3bpb	7.60166	1.87631	2.01841	0	0	lectin, galactoside-binding, soluble, 3 binding protein b [Source:ZFIN;Acc:ZDB-GENE-040426-2262]	GO:0005044(scavenger receptor activity);GO:0005515(protein binding);GO:0006898(receptor-mediated endocytosis);GO:0016020(membrane)	NA	K17300	NA
1	ENSDARG00000031776	fthl27	77.7643	19.5052	1.99525	0	0	ferritin, heavy polypeptide-like 27 [Source:ZFIN;Acc:ZDB-GENE-040718-72]	GO:0004322(ferroxidase activity);GO:0005506(iron ion binding);GO:0005737(cytoplasm);GO:0006826(iron ion transport);GO:0006879(cellular iron ion homeostasis);GO:0006880(intracellular sequestering of iron ion);GO:0008198(ferrous iron binding);GO:0008199(ferric iron binding);GO:0042802(identical protein binding);GO:0046872(metal ion binding);GO:0055114(oxidation-reduction process)	04216(Ferroptosis);04217(Necroptosis)	K00522	EC:1.16.3.2
1	ENSDARG00000095801	BX649485.2	7.3113	1.84992	1.98267	0	0	NA	NA	NA	NA	NA
1	ENSDARG00000044612	c1qb	5.75364	1.61714	1.83103	0	0	complement component 1, q subcomponent, B chain [Source:ZFIN;Acc:ZDB-GENE-040801-223]	GO:0005515(protein binding);GO:0005576(extracellular region);GO:0005581(collagen trimer);GO:0006958(complement activation, classical pathway)	NA	NA	NA
1	ENSDARG00000074322	si:ch211-194m7.3	5.55722	1.56299	1.83005	0	0	si:ch211-194m7.3 [Source:ZFIN;Acc:ZDB-GENE-131121-19]	GO:0016020(membrane);GO:0016021(integral component of membrane)	NA	NA	NA
1	ENSDARG00000054942	lgals2a	8.90315	2.57529	1.78958	0	0	lectin, galactoside-binding, soluble, 2a [Source:ZFIN;Acc:ZDB-GENE-050318-2]	GO:0001944(vasculature development);GO:0002040(sprouting angiogenesis);GO:0005575(cellular_component);GO:0016936(galactoside binding);GO:0030246(carbohydrate binding);GO:0043236(laminin binding);GO:0048741(skeletal muscle fiber development);GO:0050769(positive regulation of neurogenesis);GO:0090303(positive regulation of wound healing)	NA	NA	NA
1	ENSDARG00000088641	grn2	7.3888	2.15064	1.78057	0	0	granulin 2 [Source:ZFIN;Acc:ZDB-GENE-050522-264]	GO:0008150(biological_process)	NA	NA	NA
1	ENSDARG00000104795	cxcl8a	6.44034	1.919	1.74678	0	0	chemokine (C-X-C motif) ligand 8a [Source:ZFIN;Acc:ZDB-GENE-081104-317]	GO:0001525(angiogenesis);GO:0001570(vasculogenesis);GO:0002244(hematopoietic progenitor cell differentiation);GO:0002523(leukocyte migration involved in inflammatory response);GO:0002631(regulation of granuloma formation);GO:0005576(extracellular region);GO:0005615(extracellular space);GO:0006935(chemotaxis);GO:0006952(defense response);GO:0006954(inflammatory response);GO:0006955(immune response…	04060(Cytokine-cytokine receptor interaction);04218(Cellular senescence);04620(Toll-like receptor signaling pathway);04621(NOD-like receptor signaling pathway);04622(RIG-I-like receptor signaling pathway);04933(AGE-RAGE signaling pathway in diabetic complications);05132(Salmonella infection)	K10030	NA
1	ENSDARG00000095627	c1qc	4.74829	1.44642	1.71492	0	0	complement component 1, q subcomponent, C chain [Source:ZFIN;Acc:ZDB-GENE-041010-51]	GO:0005515(protein binding);GO:0005576(extracellular region);GO:0005581(collagen trimer);GO:0006958(complement activation, classical pathway)	NA	K03988	NA
1	ENSDARG00000090783	mfap4	4.05045	1.34348	1.59211	0	0	microfibril associated protein 4 [Source:ZFIN;Acc:ZDB-GENE-040426-2246]	GO:0005575(cellular_component)	NA	NA	NA
1	ENSDARG00000095820	BX649485.4	3.63997	1.28306	1.50434	0	0	uncharacterized LOC100536946 [Source:NCBI gene;Acc:100536946]	NA	NA	NA	NA
1	ENSDARG00000058358	krt8	8.27259	2.95303	1.48615	0	0	keratin 8 [Source:ZFIN;Acc:ZDB-GENE-030411-5]	GO:0005198(structural molecule activity);GO:0005634(nucleus);GO:0005654(nucleoplasm);GO:0005737(cytoplasm);GO:0005882(intermediate filament);GO:0016363(nuclear matrix);GO:0045095(keratin filament)	NA	K07605	NA
1	ENSDARG00000100662	cxcl11.1	4.94254	1.79304	1.46285	0	0	chemokine (C-X-C motif) ligand 11, duplicate 1 [Source:ZFIN;Acc:ZDB-GENE-070907-2]	GO:0005125(cytokine activity);GO:0005576(extracellular region);GO:0005615(extracellular space);GO:0006935(chemotaxis);GO:0006952(defense response);GO:0006954(inflammatory response);GO:0006955(immune response);GO:0008009(chemokine activity);GO:0010469(regulation of signaling receptor activity);GO:0030593(neutrophil chemotaxis);GO:0030595(leukocyte chemotaxis);GO:0042056(chemoattractant activity);G…	04060(Cytokine-cytokine receptor interaction);04620(Toll-like receptor signaling pathway)	K12672	NA
1	ENSDARG00000056874	lygl1	10.989	4.05511	1.43825	0	0	lysozyme g-like 1 [Source:ZFIN;Acc:ZDB-GENE-040718-461]	GO:0003796(lysozyme activity);GO:0005575(cellular_component);GO:0008152(metabolic process);GO:0009253(peptidoglycan catabolic process);GO:0016787(hydrolase activity);GO:0016798(hydrolase activity, acting on glycosyl bonds);GO:0016998(cell wall macromolecule catabolic process)	NA	NA	NA
1	ENSDARG00000109648	si:ch211-147m6.1	3.30591	1.2345	1.42112	0	0	si:ch211-147m6.1 [Source:ZFIN;Acc:ZDB-GENE-131120-57]	NA	NA	NA	NA
1	ENSDARG00000095807	hp.1	4.75228	1.77559	1.42032	0	0	haptoglobin [Source:ZFIN;Acc:ZDB-GENE-030131-1259]	GO:0004252(serine-type endopeptidase activity);GO:0005615(extracellular space);GO:0006508(proteolysis)	NA	NA	NA
1	ENSDARG00000027529	hmox1a	4.1862	1.58953	1.39704	0	0	heme oxygenase 1a [Source:ZFIN;Acc:ZDB-GENE-030131-3102]	GO:0001666(response to hypoxia);GO:0004392(heme oxygenase (decyclizing) activity);GO:0006788(heme oxidation);GO:0006979(response to oxidative stress);GO:0016020(membrane);GO:0020037(heme binding);GO:0042167(heme catabolic process);GO:0043576(regulation of respiratory gaseous exchange);GO:0046872(metal ion binding);GO:0055072(iron ion homeostasis);GO:0055114(oxidation-reduction process);GO:0071466…	00860(Porphyrin and chlorophyll metabolism);04216(Ferroptosis)	K00510	EC:1.14.14.18
1	ENSDARG00000043436	si:dkey-5n18.1	3.11737	1.18602	1.39419	0	0	si:dkey-5n18.1 [Source:ZFIN;Acc:ZDB-GENE-041014-144]	GO:0005515(protein binding)	NA	NA	NA
1	ENSDARG00000057035	stoml3b	3.37132	1.2849	1.39166	0	0	stomatin (EPB72)-like 3b [Source:ZFIN;Acc:ZDB-GENE-050417-366]	GO:0003674(molecular_function);GO:0008150(biological_process);GO:0016020(membrane);GO:0016021(integral component of membrane)	NA	K17286	NA
1	ENSDARG00000057853	atp6v0ca	11.7389	4.54821	1.36792	0	0	ATPase H+ transporting V0 subunit ca [Source:ZFIN;Acc:ZDB-GENE-020419-23]	GO:0001878(response to yeast);GO:0005773(vacuole);GO:0005774(vacuolar membrane);GO:0006811(ion transport);GO:0015078(proton transmembrane transporter activity);GO:0015991(ATP hydrolysis coupled proton transport);GO:0016020(membrane);GO:0016021(integral component of membrane);GO:0033177(proton-transporting two-sector ATPase complex, proton-transporting domain);GO:0033179(proton-transporting V-type…	00190(Oxidative phosphorylation);04142(Lysosome);04145(Phagosome)	K02155	NA
1	ENSDARG00000061764	ahnak	4.93712	1.91519	1.36618	0	0	AHNAK nucleoprotein [Source:ZFIN;Acc:ZDB-GENE-030131-8719]	GO:0003824(catalytic activity);GO:0005515(protein binding);GO:0005737(cytoplasm);GO:0005886(plasma membrane);GO:0016491(oxidoreductase activity);GO:0030315(T-tubule);GO:0043484(regulation of RNA splicing);GO:0055114(oxidation-reduction process)	NA	NA	NA
1	ENSDARG00000038822	mrc1b	3.83735	1.5235	1.33272	0	0	mannose receptor, C type 1b [Source:ZFIN;Acc:ZDB-GENE-070705-13]	GO:0004888(transmembrane signaling receptor activity);GO:0016020(membrane);GO:0016021(integral component of membrane)	04145(Phagosome)	K06560	NA
1	ENSDARG00000039150	lgmn	4.22817	1.73484	1.28523	0	0	legumain [Source:ZFIN;Acc:ZDB-GENE-021030-1]	GO:0004197(cysteine-type endopeptidase activity);GO:0005773(vacuole);GO:0006508(proteolysis);GO:0006624(vacuolar protein processing);GO:0008233(peptidase activity);GO:0031103(axon regeneration);GO:0042246(tissue regeneration);GO:0051603(proteolysis involved in cellular protein catabolic process)	04142(Lysosome)	K01369	EC:3.4.22.34
1	ENSDARG00000044613	c1qa	2.73517	1.12664	1.2796	0	0	complement component 1, q subcomponent, A chain [Source:ZFIN;Acc:ZDB-GENE-050522-86]	GO:0003674(molecular_function);GO:0005515(protein binding);GO:0006958(complement activation, classical pathway);GO:0070207(protein homotrimerization)	NA	K03986	NA
1	ENSDARG00000057698	ctsd	5.96688	2.46113	1.27765	0	0	cathepsin D [Source:ZFIN;Acc:ZDB-GENE-010131-8]	GO:0003406(retinal pigment epithelium development);GO:0004190(aspartic-type endopeptidase activity);GO:0005764(lysosome);GO:0006508(proteolysis);GO:0008233(peptidase activity);GO:0009617(response to bacterium);GO:0016787(hydrolase activity);GO:0030163(protein catabolic process);GO:0061061(muscle structure development)	04140(Autophagy - animal);04142(Lysosome);04210(Apoptosis)	K01379	EC:3.4.23.5
1	ENSDARG00000033614	rasgef1ba	5.60488	2.3349	1.26333	0	0	RasGEF domain family, member 1Ba [Source:ZFIN;Acc:ZDB-GENE-030131-5783]	GO:0005085(guanyl-nucleotide exchange factor activity);GO:0005088(Ras guanyl-nucleotide exchange factor activity);GO:0005622(intracellular);GO:0007264(small GTPase mediated signal transduction);GO:0043547(positive regulation of GTPase activity)	NA	NA	NA
1	ENSDARG00000013711	zgc:77486.1	4.24321	1.78267	1.25112	0	0	zgc:77486 [Source:ZFIN;Acc:ZDB-GENE-040426-2056]	GO:0005575(cellular_component);GO:0008150(biological_process)	NA	K20287	NA
1	ENSDARG00000088745	MFAP4 (1 of many)	2.54957	1.07132	1.25087	0	0	zgc:173915 [Source:ZFIN;Acc:ZDB-GENE-071004-112]	GO:0005575(cellular_component)	NA	NA	NA
1	ENSDARG00000067566	sftpbb	4.0488	1.72726	1.22901	0	0	surfactant protein Bb [Source:ZFIN;Acc:ZDB-GENE-060526-155]	GO:0003676(nucleic acid binding);GO:0005764(lysosome);GO:0006629(lipid metabolic process);GO:0006665(sphingolipid metabolic process)	NA	NA	NA
1	ENSDARG00000090352	CR855311.1	6.86468	3.03684	1.17662	0	0	uncharacterized LOC101883708 [Source:NCBI gene;Acc:101883708]	NA	NA	NA	NA
1	ENSDARG00000035715	marcksl1b	38.5071	17.1766	1.16468	0	0	MARCKS-like 1b [Source:ZFIN;Acc:ZDB-GENE-040426-2315]	GO:0003407(neural retina development);GO:0005516(calmodulin binding);GO:0005737(cytoplasm);GO:0005856(cytoskeleton);GO:0005886(plasma membrane);GO:0007417(central nervous system development);GO:0016020(membrane);GO:0051216(cartilage development)	NA	NA	NA
1	ENSDARG00000057949	slc43a3b	2.45728	1.09788	1.16234	0	0	solute carrier family 43, member 3b [Source:ZFIN;Acc:ZDB-GENE-060312-28]	GO:0016020(membrane);GO:0016021(integral component of membrane);GO:0055085(transmembrane transport)	NA	K08230	NA
1	ENSDARG00000016470	anxa5b	2.51089	1.13403	1.14674	0	0	annexin A5b [Source:ZFIN;Acc:ZDB-GENE-030131-9076]	GO:0005509(calcium ion binding);GO:0005544(calcium-dependent phospholipid binding);GO:0005737(cytoplasm);GO:0050819(negative regulation of coagulation);GO:2000145(regulation of cell motility)	NA	K16646	NA
1	ENSDARG00000103466	ccl35.1	50.8487	23.1258	1.13671	0	0	chemokine (C-C motif) ligand 35, duplicate 1 [Source:ZFIN;Acc:ZDB-GENE-081022-33]	GO:0002548(monocyte chemotaxis);GO:0005576(extracellular region);GO:0005615(extracellular space);GO:0006954(inflammatory response);GO:0006955(immune response);GO:0007186(G protein-coupled receptor signaling pathway);GO:0008009(chemokine activity);GO:0030593(neutrophil chemotaxis);GO:0043547(positive regulation of GTPase activity);GO:0048020(CCR chemokine receptor binding);GO:0048247(lymphocyte ch…	NA	NA	NA
1	ENSDARG00000009087	cd74a	34.779	15.8643	1.13243	0	0	CD74 molecule, major histocompatibility complex, class II invariant chain a [Source:ZFIN;Acc:ZDB-GENE-000901-1]	GO:0002286(T cell activation involved in immune response);GO:0002468(dendritic cell antigen processing and presentation);GO:0006886(intracellular protein transport);GO:0006955(immune response);GO:0009986(cell surface);GO:0016020(membrane);GO:0016021(integral component of membrane);GO:0019882(antigen processing and presentation);GO:0042289(MHC class II protein binding);GO:0048839(inner ear develop…	05168(Herpes simplex virus 1 infection)	K06505	NA
1	ENSDARG00000012450	vmp1	3.66313	1.67275	1.13086	0	0	vacuole membrane protein 1 [Source:ZFIN;Acc:ZDB-GENE-030131-8733]	GO:0016020(membrane);GO:0016021(integral component of membrane)	04140(Autophagy - animal)	K21248	NA
1	ENSDARG00000024540	tspan36	6.67409	3.07656	1.11725	0	0	tetraspanin 36 [Source:ZFIN;Acc:ZDB-GENE-040718-248]	GO:0000139(Golgi membrane);GO:0005783(endoplasmic reticulum);GO:0005789(endoplasmic reticulum membrane);GO:0005794(Golgi apparatus);GO:0005887(integral component of plasma membrane);GO:0007166(cell surface receptor signaling pathway);GO:0007275(multicellular organism development);GO:0016020(membrane);GO:0016021(integral component of membrane);GO:0043473(pigmentation)	NA	NA	NA
1	ENSDARG00000098745	tfec	2.2214	1.03676	1.09938	0	0	transcription factor EC [Source:ZFIN;Acc:ZDB-GENE-041210-21]	GO:0006355(regulation of transcription, DNA-templated);GO:0030097(hemopoiesis);GO:0046983(protein dimerization activity);GO:0060216(definitive hemopoiesis);GO:0061484(hematopoietic stem cell homeostasis);GO:0071425(hematopoietic stem cell proliferation)	NA	K15591	NA
1	ENSDARG00000044254	anxa3b	4.87961	2.28029	1.09755	0	0	annexin A3b [Source:ZFIN;Acc:ZDB-GENE-041114-128]	GO:0004859(phospholipase inhibitor activity);GO:0005509(calcium ion binding);GO:0005544(calcium-dependent phospholipid binding);GO:0005886(plasma membrane);GO:0006909(phagocytosis);GO:0007156(homophilic cell adhesion via plasma membrane adhesion molecules);GO:0010595(positive regulation of endothelial cell migration);GO:0019834(phospholipase A2 inhibitor activity);GO:0043086(negative regulation o…	NA	K17089	NA
1	ENSDARG00000055120	ctsba	4.56715	2.1417	1.09254	0	0	cathepsin Ba [Source:ZFIN;Acc:ZDB-GENE-040426-2650]	GO:0004197(cysteine-type endopeptidase activity);GO:0005615(extracellular space);GO:0005764(lysosome);GO:0006508(proteolysis);GO:0008233(peptidase activity);GO:0008234(cysteine-type peptidase activity);GO:0009953(dorsal/ventral pattern formation);GO:0016787(hydrolase activity);GO:0031101(fin regeneration);GO:0050790(regulation of catalytic activity);GO:0051603(proteolysis involved in cellular pro…	04140(Autophagy - animal);04142(Lysosome);04210(Apoptosis);04621(NOD-like receptor signaling pathway)	K01363	EC:3.4.22.1
1	ENSDARG00000090396	si:cabz01074946.1	4.61623	2.19515	1.0724	0	0	si:cabz01074946.1 [Source:ZFIN;Acc:ZDB-GENE-160113-134]	GO:0016020(membrane);GO:0016021(integral component of membrane)	NA	K06511	NA
1	ENSDARG00000043081	ctsz	2.92564	1.40902	1.05406	0	0	cathepsin Z [Source:ZFIN;Acc:ZDB-GENE-041010-139]	GO:0001525(angiogenesis);GO:0004197(cysteine-type endopeptidase activity);GO:0005615(extracellular space);GO:0005764(lysosome);GO:0006508(proteolysis);GO:0008234(cysteine-type peptidase activity);GO:0051603(proteolysis involved in cellular protein catabolic process)	04142(Lysosome);04210(Apoptosis)	K08568	EC:3.4.18.1
1	ENSDARG00000013771	ctss2.2	4.32538	2.08536	1.05253	0	0	cathepsin S, ortholog 2, tandem duplicate 2 [Source:ZFIN;Acc:ZDB-GENE-050626-55]	GO:0004197(cysteine-type endopeptidase activity);GO:0005615(extracellular space);GO:0005764(lysosome);GO:0006508(proteolysis);GO:0008233(peptidase activity);GO:0008234(cysteine-type peptidase activity);GO:0016787(hydrolase activity);GO:0051603(proteolysis involved in cellular protein catabolic process)	04142(Lysosome);04145(Phagosome);04210(Apoptosis)	K01368	EC:3.4.22.27
1	ENSDARG00000056795	serpine1	2.23198	1.07881	1.04888	0	0	serpin peptidase inhibitor, clade E (nexin, plasminogen activator inhibitor type 1), member 1 [Source:ZFIN;Acc:ZDB-GENE-070912-60]	GO:0004867(serine-type endopeptidase inhibitor activity);GO:0005615(extracellular space);GO:0010757(negative regulation of plasminogen activation);GO:0010951(negative regulation of endopeptidase activity)	04115(p53 signaling pathway);04218(Cellular senescence);04371(Apelin signaling pathway);04933(AGE-RAGE signaling pathway in diabetic complications)	K03982	NA
1	ENSDARG00000010625	clic2	5.10413	2.49103	1.03492	0	0	chloride intracellular channel 2 [Source:ZFIN;Acc:ZDB-GENE-040718-299]	GO:0005244(voltage-gated ion channel activity);GO:0005254(chloride channel activity);GO:0005515(protein binding);GO:0005634(nucleus);GO:0005737(cytoplasm);GO:0006811(ion transport);GO:0006821(chloride transport);GO:0016020(membrane);GO:0034707(chloride channel complex);GO:0034765(regulation of ion transmembrane transport);GO:0060315(negative regulation of ryanodine-sensitive calcium-release chann…	NA	K05022	NA
1	ENSDARG00000002196	bach1b	2.76668	1.35133	1.03377	0	0	BTB and CNC homology 1, basic leucine zipper transcription factor 1 b [Source:ZFIN;Acc:ZDB-GENE-050522-220]	GO:0000976(transcription regulatory region sequence-specific DNA binding);GO:0003677(DNA binding);GO:0003700(DNA-binding transcription factor activity);GO:0005515(protein binding);GO:0005634(nucleus);GO:0006355(regulation of transcription, DNA-templated)	NA	NA	NA
1	ENSDARG00000075014	sqstm1	5.93217	2.89847	1.03327	0	0	sequestosome 1 [Source:ZFIN;Acc:ZDB-GENE-040426-2204]	GO:0000423(mitophagy);GO:0005080(protein kinase C binding);GO:0005515(protein binding);GO:0005776(autophagosome);GO:0007005(mitochondrion organization);GO:0007032(endosome organization);GO:0007409(axonogenesis);GO:0007626(locomotory behavior);GO:0008270(zinc ion binding);GO:0010506(regulation of autophagy);GO:0016235(aggresome);GO:0035973(aggrephagy);GO:0044753(amphisome);GO:0046872(metal ion bin…	04137(Mitophagy - animal);04217(Necroptosis);04218(Cellular senescence)	K14381	NA
1	ENSDARG00000102514	BX323596.2	2.58725	1.26453	1.03282	0	0	C-X-C motif chemokine 11-6-like [Source:NCBI gene;Acc:100334604]	GO:0005576(extracellular region);GO:0005615(extracellular space);GO:0006935(chemotaxis);GO:0006952(defense response);GO:0006954(inflammatory response);GO:0006955(immune response);GO:0008009(chemokine activity);GO:0030593(neutrophil chemotaxis);GO:0030595(leukocyte chemotaxis);GO:0061844(antimicrobial humoral immune response mediated by antimicrobial peptide);GO:0070098(chemokine-mediated signalin…	NA	NA	NA
1	ENSDARG00000095695	ms4a17a.10	1.94673	0.951799	1.03232	0	0	membrane-spanning 4-domains, subfamily A, member 17A.10 [Source:ZFIN;Acc:ZDB-GENE-080829-3]	GO:0016020(membrane);GO:0016021(integral component of membrane)	NA	K22190	NA
1	ENSDARG00000098752	csf3b	12.9338	6.34974	1.02638	0	0	colony stimulating factor 3 (granulocyte) b [Source:ZFIN;Acc:ZDB-GENE-141212-221]	GO:0005125(cytokine activity);GO:0010469(regulation of signaling receptor activity);GO:0030099(myeloid cell differentiation);GO:0030223(neutrophil differentiation);GO:0030225(macrophage differentiation);GO:0030593(neutrophil chemotaxis);GO:0045639(positive regulation of myeloid cell differentiation);GO:0060218(hematopoietic stem cell differentiation);GO:0061515(myeloid cell development);GO:007142…	NA	NA	NA
1	ENSDARG00000069844	acod1	2.15986	1.09047	0.985992	0	0	aconitate decarboxylase 1 [Source:ZFIN;Acc:ZDB-GENE-081104-428]	GO:0005739(mitochondrion);GO:0006952(defense response);GO:0016829(lyase activity);GO:0019679(propionate metabolic process, methylcitrate cycle);GO:0042742(defense response to bacterium);GO:0047547(2-methylcitrate dehydratase activity);GO:0047613(aconitate decarboxylase activity);GO:1903426(regulation of reactive oxygen species biosynthetic process)	NA	K17724	EC:4.1.1.6
1	ENSDARG00000004954	grna	2.40122	1.21628	0.98129	0	0	granulin a [Source:ZFIN;Acc:ZDB-GENE-030131-8434]	GO:0001889(liver development);GO:0005886(plasma membrane);GO:0048675(axon extension);GO:0071340(skeletal muscle acetylcholine-gated channel clustering)	NA	NA	NA
1	ENSDARG00000111882	si:ch211-194m7.4	1.71059	0.870238	0.97501	0	0	si:ch211-194m7.4 [Source:ZFIN;Acc:ZDB-GENE-131125-83]	NA	NA	NA	NA
1	ENSDARG00000059906	sdc4	8.68231	4.44931	0.964495	0	0	syndecan 4 [Source:ZFIN;Acc:ZDB-GENE-061111-1]	GO:0005546(phosphatidylinositol-4,5-bisphosphate binding);GO:0005925(focal adhesion);GO:0007155(cell adhesion);GO:0009986(cell surface);GO:0016020(membrane);GO:0016021(integral component of membrane);GO:0016477(cell migration);GO:0033627(cell adhesion mediated by integrin);GO:0036445(neuronal stem cell division);GO:0042060(wound healing);GO:0043149(stress fiber assembly);GO:0055113(epiboly involv…	04512(ECM-receptor interaction);04514(Cell adhesion molecules (CAMs))	K16338	NA
1	ENSDARG00000094451	cfp	1.92236	0.986969	0.961801	0	0	complement factor properdin [Source:ZFIN;Acc:ZDB-GENE-030131-9247]	GO:0006955(immune response)	05168(Herpes simplex virus 1 infection)	K15412	NA
1	ENSDARG00000105142	tcirg1b	2.22151	1.16557	0.930504	0	0	T cell immune regulator 1, ATPase H+ transporting V0 subunit a3b [Source:ZFIN;Acc:ZDB-GENE-040426-2022]	GO:0000220(vacuolar proton-transporting V-type ATPase, V0 domain);GO:0005886(plasma membrane);GO:0006811(ion transport);GO:0007035(vacuolar acidification);GO:0015078(proton transmembrane transporter activity);GO:0015991(ATP hydrolysis coupled proton transport);GO:0016020(membrane);GO:0016021(integral component of membrane);GO:0016471(vacuolar proton-transporting V-type ATPase complex);GO:0033179(…	00190(Oxidative phosphorylation);04142(Lysosome);04145(Phagosome)	K02154	NA
1	ENSDARG00000030694	atp6v1e1b	2.81702	1.48091	0.92769	0	0	ATPase H+ transporting V1 subunit E1b [Source:ZFIN;Acc:ZDB-GENE-020419-11]	GO:0008900(potassium:proton exchanging ATPase activity);GO:0015991(ATP hydrolysis coupled proton transport);GO:0031101(fin regeneration);GO:0033178(proton-transporting two-sector ATPase complex, catalytic domain);GO:0033336(caudal fin development);GO:0046961(proton-transporting ATPase activity, rotational mechanism);GO:0060036(notochord cell vacuolation);GO:0060041(retina development in camera-ty…	00190(Oxidative phosphorylation);04145(Phagosome);04150(mTOR signaling pathway)	K02150	NA
1	ENSDARG00000094210	fthl31	2.24033	1.18151	0.92308	0	0	ferritin, heavy polypeptide-like 31 [Source:ZFIN;Acc:ZDB-GENE-050522-428]	GO:0005623(cell);GO:0006826(iron ion transport);GO:0006879(cellular iron ion homeostasis);GO:0008199(ferric iron binding);GO:0046872(metal ion binding)	NA	NA	NA
1	ENSDARG00000013968	psap	3.90727	2.06362	0.920982	0	0	prosaposin [Source:ZFIN;Acc:ZDB-GENE-020108-1]	GO:0005764(lysosome);GO:0006629(lipid metabolic process);GO:0006665(sphingolipid metabolic process)	04142(Lysosome)	K12382	NA
1	ENSDARG00000005463	slc30a1a	2.16919	1.15108	0.914173	0	0	solute carrier family 30 (zinc transporter), member 1a [Source:ZFIN;Acc:ZDB-GENE-040426-1840]	GO:0005385(zinc ion transmembrane transporter activity);GO:0005886(plasma membrane);GO:0006812(cation transport);GO:0006829(zinc ion transport);GO:0008324(cation transmembrane transporter activity);GO:0010043(response to zinc ion);GO:0016020(membrane);GO:0016021(integral component of membrane);GO:0055085(transmembrane transport);GO:0071577(zinc ion transmembrane transport);GO:0098655(cation trans…	NA	K14688	NA
1	ENSDARG00000076221	fthl28	1.87883	1.00968	0.895943	0	0	ferritin, heavy polypeptide-like 28 [Source:ZFIN;Acc:ZDB-GENE-030131-7540]	GO:0004322(ferroxidase activity);GO:0005506(iron ion binding);GO:0005737(cytoplasm);GO:0006826(iron ion transport);GO:0006879(cellular iron ion homeostasis);GO:0006880(intracellular sequestering of iron ion);GO:0008198(ferrous iron binding);GO:0008199(ferric iron binding);GO:0042802(identical protein binding);GO:0046872(metal ion binding);GO:0055114(oxidation-reduction process)	NA	NA	NA
1	ENSDARG00000079105	mhc2dab	5.30013	2.85723	0.89141	0	0	major histocompatibility complex class II DAB gene [Source:ZFIN;Acc:ZDB-GENE-980526-200]	GO:0003674(molecular_function);GO:0006955(immune response);GO:0016020(membrane);GO:0016021(integral component of membrane);GO:0019882(antigen processing and presentation);GO:0042613(MHC class II protein complex)	04145(Phagosome);04514(Cell adhesion molecules (CAMs));04672(Intestinal immune network for IgA production);05168(Herpes simplex virus 1 infection)	K06752	NA
1	ENSDARG00000036628	cd74b	12.8066	6.93406	0.885117	0	0	CD74 molecule, major histocompatibility complex, class II invariant chain b [Source:ZFIN;Acc:ZDB-GENE-990910-10]	GO:0005623(cell);GO:0006886(intracellular protein transport);GO:0006955(immune response);GO:0016020(membrane);GO:0016021(integral component of membrane);GO:0019882(antigen processing and presentation);GO:0042289(MHC class II protein binding);GO:0048839(inner ear development);GO:0048884(neuromast development)	NA	NA	NA
1	ENSDARG00000059049	zgc:174904	1.94445	1.05864	0.877149	0	0	zgc:174904 [Source:ZFIN;Acc:ZDB-GENE-080204-76]	GO:0008150(biological_process);GO:0016020(membrane);GO:0016021(integral component of membrane);GO:0030246(carbohydrate binding)	NA	NA	NA
1	ENSDARG00000089383	il1fma	1.8513	1.00962	0.874725	0	0	interleukin-1 family member A [Source:ZFIN;Acc:ZDB-GENE-140106-231]	GO:0005125(cytokine activity);GO:0005576(extracellular region);GO:0005615(extracellular space);GO:0006954(inflammatory response);GO:0006955(immune response);GO:0010469(regulation of signaling receptor activity)	NA	NA	NA
1	ENSDARG00000105316	si:dkey-187j14.7	1.54462	0.853625	0.855581	0	0	si:dkey-187j14.7 [Source:ZFIN;Acc:ZDB-GENE-160113-3]	GO:0005515(protein binding);GO:0005524(ATP binding);GO:0005623(cell);GO:0006605(protein targeting);GO:0006886(intracellular protein transport);GO:0015462(ATPase-coupled protein transmembrane transporter activity);GO:0016020(membrane);GO:0017038(protein import);GO:0071806(protein transmembrane transport)	NA	NA	NA
1	ENSDARG00000102758	FO704661.1	1.4997	0.839664	0.836786	0	0	gamma-glutamyl hydrolase [Source:NCBI gene;Acc:553228]	GO:0005773(vacuole);GO:0006508(proteolysis);GO:0008242(omega peptidase activity);GO:0016787(hydrolase activity);GO:0034722(gamma-glutamyl-peptidase activity);GO:0046900(tetrahydrofolylpolyglutamate metabolic process)	NA	NA	NA
1	ENSDARG00000017121	mafba	1.4677	0.824449	0.832058	0	0	v-maf avian musculoaponeurotic fibrosarcoma oncogene homolog Ba [Source:ZFIN;Acc:ZDB-GENE-980526-515]	GO:0000978(RNA polymerase II proximal promoter sequence-specific DNA binding);GO:0001946(lymphangiogenesis);GO:0003677(DNA binding);GO:0003700(DNA-binding transcription factor activity);GO:0005634(nucleus);GO:0006355(regulation of transcription, DNA-templated);GO:0009880(embryonic pattern specification);GO:0009952(anterior/posterior pattern specification);GO:0021571(rhombomere 5 development);GO:0…	NA	K09036	NA
1	ENSDARG00000017834	micall2b	1.39941	0.789095	0.826548	0	0	mical-like 2b [Source:ZFIN;Acc:ZDB-GENE-030131-5803]	GO:0005515(protein binding);GO:0005623(cell);GO:0017137(Rab GTPase binding);GO:0032456(endocytic recycling);GO:0036269(swimming behavior);GO:0046872(metal ion binding)	04530(Tight junction)	K21068	NA
1	ENSDARG00000043257	ckbb	2.62477	1.48317	0.823505	0	0	creatine kinase, brain b [Source:ZFIN;Acc:ZDB-GENE-020103-2]	GO:0000166(nucleotide binding);GO:0003824(catalytic activity);GO:0004111(creatine kinase activity);GO:0005524(ATP binding);GO:0016301(kinase activity);GO:0016310(phosphorylation);GO:0016740(transferase activity);GO:0016772(transferase activity, transferring phosphorus-containing groups)	00330(Arginine and proline metabolism)	K00933	EC:2.7.3.2
1	ENSDARG00000009511	tnfa	1.43414	0.813019	0.81883	0	0	tumor necrosis factor a (TNF superfamily, member 2) [Source:ZFIN;Acc:ZDB-GENE-050317-1]	GO:0001889(liver development);GO:0002237(response to molecule of bacterial origin);GO:0005125(cytokine activity);GO:0005164(tumor necrosis factor receptor binding);GO:0005515(protein binding);GO:0005615(extracellular space);GO:0006914(autophagy);GO:0006954(inflammatory response);GO:0006955(immune response);GO:0009615(response to virus);GO:0009617(response to bacterium);GO:0010469(regulation of si…	04010(MAPK signaling pathway);04060(Cytokine-cytokine receptor interaction);04150(mTOR signaling pathway);04210(Apoptosis);04217(Necroptosis);04350(TGF-beta signaling pathway);04620(Toll-like receptor signaling pathway);04621(NOD-like receptor signaling pathway);04622(RIG-I-like receptor signaling pathway);04625(C-type lectin receptor signaling pathway);04920(Adipocytokine signaling pathway);0493…	K03156	NA
1	ENSDARG00000040178	havcr1	1.35633	0.772608	0.811894	0	0	hepatitis A virus cellular receptor 1 [Source:ZFIN;Acc:ZDB-GENE-040718-131]	GO:0016020(membrane);GO:0016021(integral component of membrane);GO:0043277(apoptotic cell clearance);GO:0043652(engulfment of apoptotic cell);GO:0060097(cytoskeletal rearrangement involved in phagocytosis, engulfment)	NA	NA	NA
1	ENSDARG00000001953	pfkfb3	2.77765	1.59306	0.802061	0	0	6-phosphofructo-2-kinase/fructose-2,6-biphosphatase 3 [Source:ZFIN;Acc:ZDB-GENE-040426-2724]	GO:0003824(catalytic activity);GO:0003873(6-phosphofructo-2-kinase activity);GO:0004331(fructose-2,6-bisphosphate 2-phosphatase activity);GO:0005524(ATP binding);GO:0005575(cellular_component);GO:0005829(cytosol);GO:0006000(fructose metabolic process);GO:0006003(fructose 2,6-bisphosphate metabolic process);GO:0016301(kinase activity);GO:0016310(phosphorylation);GO:0016311(dephosphorylation);GO:00…	00051(Fructose and mannose metabolism)	K01103	3.1.3.46;EC:2.7.1.105
1	ENSDARG00000031745	si:busm1-266f07.2	8.0391	4.61597	0.8004	0	0	si:busm1-266f07.2 [Source:ZFIN;Acc:ZDB-GENE-030616-436]	GO:0006955(immune response);GO:0016020(membrane);GO:0016021(integral component of membrane);GO:0019882(antigen processing and presentation);GO:0042613(MHC class II protein complex)	04145(Phagosome);04514(Cell adhesion molecules (CAMs));04672(Intestinal immune network for IgA production);05168(Herpes simplex virus 1 infection)	K06752	NA
1	ENSDARG00000089307	pmaip1	5.63327	3.25659	0.790612	0	0	phorbol-12-myristate-13-acetate-induced protein 1 [Source:ZFIN;Acc:ZDB-GENE-070119-3]	GO:0001836(release of cytochrome c from mitochondria);GO:0005575(cellular_component);GO:0006915(apoptotic process);GO:0006919(activation of cysteine-type endopeptidase activity involved in apoptotic process);GO:0006974(cellular response to DNA damage stimulus);GO:0007088(regulation of mitotic nuclear division);GO:0042981(regulation of apoptotic process);GO:0043065(positive regulation of apoptotic…	04115(p53 signaling pathway);04210(Apoptosis)	K10131	NA
1	ENSDARG00000026726	anxa1a	3.11653	1.8029	0.789616	0	0	annexin A1a [Source:ZFIN;Acc:ZDB-GENE-030131-6664]	GO:0002548(monocyte chemotaxis);GO:0002685(regulation of leukocyte migration);GO:0003697(single-stranded DNA binding);GO:0003727(single-stranded RNA binding);GO:0004859(phospholipase inhibitor activity);GO:0005198(structural molecule activity);GO:0005509(calcium ion binding);GO:0005544(calcium-dependent phospholipid binding);GO:0005615(extracellular space);GO:0005886(plasma membrane);GO:0006909(p…	NA	K17091	NA
1	ENSDARG00000022315	atp6v1g1	4.18674	2.42342	0.788784	0	0	ATPase H+ transporting V1 subunit G1 [Source:ZFIN;Acc:ZDB-GENE-030131-6965]	GO:0006811(ion transport);GO:0008553(proton-exporting ATPase activity, phosphorylative mechanism);GO:0016471(vacuolar proton-transporting V-type ATPase complex);GO:0042626(ATPase activity, coupled to transmembrane movement of substances);GO:1902600(proton transmembrane transport)	00190(Oxidative phosphorylation);04145(Phagosome);04150(mTOR signaling pathway)	K02152	NA
1	ENSDARG00000062590	pleca	2.22389	1.3094	0.764178	0	0	plectin a [Source:ZFIN;Acc:ZDB-GENE-030131-8984]	GO:0003779(actin binding);GO:0005198(structural molecule activity);GO:0005200(structural constituent of cytoskeleton);GO:0005515(protein binding);GO:0005737(cytoplasm);GO:0005856(cytoskeleton);GO:0005882(intermediate filament);GO:0005925(focal adhesion);GO:0007010(cytoskeleton organization);GO:0007519(skeletal muscle tissue development);GO:0007626(locomotory behavior);GO:0008092(cytoskeletal prot…	NA	K10388	NA
1	ENSDARG00000055226	slc7a7	1.27867	0.755692	0.758774	0	0	solute carrier family 7 (amino acid transporter light chain, y+L system), member 7 [Source:ZFIN;Acc:ZDB-GENE-051127-5]	GO:0014005(microglia development);GO:0015179(L-amino acid transmembrane transporter activity);GO:0016020(membrane);GO:0016021(integral component of membrane);GO:0022857(transmembrane transporter activity);GO:0055085(transmembrane transport);GO:1902475(L-alpha-amino acid transmembrane transport)	NA	K13867	NA
1	ENSDARG00000041108	ctsh	1.8661	1.10855	0.751348	0	0	cathepsin H [Source:ZFIN;Acc:ZDB-GENE-030131-3539]	GO:0004197(cysteine-type endopeptidase activity);GO:0005615(extracellular space);GO:0005764(lysosome);GO:0006508(proteolysis);GO:0008233(peptidase activity);GO:0008234(cysteine-type peptidase activity);GO:0016787(hydrolase activity);GO:0051603(proteolysis involved in cellular protein catabolic process)	04142(Lysosome);04210(Apoptosis)	K01366	EC:3.4.22.16
1	ENSDARG00000004539	ptgs2a	1.44603	0.862047	0.746263	0	0	prostaglandin-endoperoxide synthase 2a [Source:ZFIN;Acc:ZDB-GENE-020530-2]	GO:0001516(prostaglandin biosynthetic process);GO:0004601(peroxidase activity);GO:0004666(prostaglandin-endoperoxide synthase activity);GO:0006954(inflammatory response);GO:0006979(response to oxidative stress);GO:0008217(regulation of blood pressure);GO:0019371(cyclooxygenase pathway);GO:0020037(heme binding);GO:0031017(exocrine pancreas development);GO:0048545(response to steroid hormone);GO:00…	00590(Arachidonic acid metabolism);04370(VEGF signaling pathway);04625(C-type lectin receptor signaling pathway)	K11987	EC:1.14.99.1
1	ENSDARG00000058731	slc2a6	4.82413	2.87672	0.745844	0	0	solute carrier family 2 (facilitated glucose transporter), member 6 [Source:ZFIN;Acc:ZDB-GENE-081104-301]	GO:0005215(transporter activity);GO:0005351(carbohydrate:proton symporter activity);GO:0005887(integral component of plasma membrane);GO:0016020(membrane);GO:0016021(integral component of membrane);GO:0022857(transmembrane transporter activity);GO:0034219(carbohydrate transmembrane transport);GO:0055056(D-glucose transmembrane transporter activity);GO:0055085(transmembrane transport);GO:1902600(p…	NA	K08144	NA
1	ENSDARG00000076144	si:ch211-74m13.3	2.33248	1.39161	0.745109	0	0	si:ch211-74m13.3 [Source:ZFIN;Acc:ZDB-GENE-060503-219]	GO:0016020(membrane);GO:0016021(integral component of membrane);GO:0098609(cell-cell adhesion)	NA	NA	NA
1	ENSDARG00000099660	CU915256.1	1.24107	0.741693	0.742694	0	0	XK-related protein 8-like [Source:NCBI gene;Acc:100148479]	NA	NA	NA	NA
1	ENSDARG00000093098	ccl34b.8	1.19195	0.713687	0.739963	0	0	chemokine (C-C motif) ligand 34b, duplicate 8 [Source:ZFIN;Acc:ZDB-GENE-111012-6]	GO:0002548(monocyte chemotaxis);GO:0005576(extracellular region);GO:0005615(extracellular space);GO:0006954(inflammatory response);GO:0006955(immune response);GO:0007186(G protein-coupled receptor signaling pathway);GO:0008009(chemokine activity);GO:0030593(neutrophil chemotaxis);GO:0043547(positive regulation of GTPase activity);GO:0048020(CCR chemokine receptor binding);GO:0048247(lymphocyte ch…	NA	NA	NA
1	ENSDARG00000034817	asah1b	1.70994	1.02417	0.739495	0	0	N-acylsphingosine amidohydrolase (acid ceramidase) 1b [Source:ZFIN;Acc:ZDB-GENE-040426-1512]	GO:0005764(lysosome);GO:0006629(lipid metabolic process);GO:0016810(hydrolase activity, acting on carbon-nitrogen (but not peptide) bonds);GO:0017040(N-acylsphingosine amidohydrolase activity);GO:0048668(collateral sprouting)	00600(Sphingolipid metabolism);04142(Lysosome)	K12348	EC:3.5.1.23
1	ENSDARG00000033587	CABZ01088134.1	1.18948	0.714677	0.73497	0	0	enoyl-[acyl-carrier-protein] reductase, mitochondrial-like [Source:NCBI gene;Acc:101884755]	GO:0005739(mitochondrion);GO:0006631(fatty acid metabolic process);GO:0016491(oxidoreductase activity);GO:0019166(trans-2-enoyl-CoA reductase (NADPH) activity);GO:0055114(oxidation-reduction process)	NA	NA	NA
1	ENSDARG00000090401	CABZ01020840.1	1.51416	0.910636	0.733575	0	0	apoptosis facilitator Bcl-2-like protein 14 [Source:NCBI gene;Acc:101885512]	GO:0042981(regulation of apoptotic process)	NA	NA	NA
1	ENSDARG00000076914	lacc1	2.3485	1.4146	0.731349	0	0	laccase (multicopper oxidoreductase) domain containing 1 [Source:ZFIN;Acc:ZDB-GENE-081104-155]	GO:0005507(copper ion binding)	NA	K05810	EC:1.10.3.-
1	ENSDARG00000056642	hdac9b	2.52679	1.5227	0.730676	0	0	histone deacetylase 9b [Source:ZFIN;Acc:ZDB-GENE-040109-7]	NA	NA	K11409	EC:3.5.1.98
1	ENSDARG00000094112	slc22a21	1.12971	0.689988	0.711311	0	0	solute carrier family 22 (organic cation transporter), member 21 [Source:ZFIN;Acc:ZDB-GENE-091118-62]	GO:0005215(transporter activity);GO:0015199(amino-acid betaine transmembrane transporter activity);GO:0015838(amino-acid betaine transport);GO:0016020(membrane);GO:0016021(integral component of membrane);GO:0022857(transmembrane transporter activity);GO:0055085(transmembrane transport)	NA	K08202	NA
1	ENSDARG00000013443	atp6v1ba	1.88404	1.16822	0.689515	0	0	ATPase, H+ transporting, lysosomal, V1 subunit B, member a [Source:ZFIN;Acc:ZDB-GENE-030711-3]	GO:0005524(ATP binding);GO:0015991(ATP hydrolysis coupled proton transport);GO:0033180(proton-transporting V-type ATPase, V1 domain);GO:0046034(ATP metabolic process);GO:1902600(proton transmembrane transport)	00190(Oxidative phosphorylation);04145(Phagosome);04150(mTOR signaling pathway)	K02147	NA
1	ENSDARG00000056443	zgc:152753	1.1222	0.697042	0.687011	0	0	zgc:152753 [Source:ZFIN;Acc:ZDB-GENE-060818-8]	GO:0005525(GTP binding);GO:0005575(cellular_component);GO:0008150(biological_process)	NA	NA	NA
1	ENSDARG00000094854	ms4a17a.9	1.03332	0.64288	0.684669	0	0	membrane-spanning 4-domains, subfamily A, member 17A.9 [Source:ZFIN;Acc:ZDB-GENE-050320-79]	GO:0016020(membrane);GO:0016021(integral component of membrane)	NA	K22190	NA
1	ENSDARG00000075265	plaua	1.31692	0.821766	0.680372	0	0	plasminogen activator, urokinase a [Source:ZFIN;Acc:ZDB-GENE-090313-278]	GO:0004252(serine-type endopeptidase activity);GO:0005615(extracellular space);GO:0006508(proteolysis);GO:0008233(peptidase activity);GO:0008236(serine-type peptidase activity);GO:0016301(kinase activity);GO:0016310(phosphorylation);GO:0016787(hydrolase activity);GO:0031639(plasminogen activation)	NA	NA	NA
1	ENSDARG00000101334	ctsc	1.91041	1.2093	0.659714	0	0	cathepsin C [Source:ZFIN;Acc:ZDB-GENE-030619-9]	GO:0004197(cysteine-type endopeptidase activity);GO:0005615(extracellular space);GO:0005764(lysosome);GO:0006508(proteolysis);GO:0008233(peptidase activity);GO:0008234(cysteine-type peptidase activity);GO:0016787(hydrolase activity);GO:0051603(proteolysis involved in cellular protein catabolic process)	04142(Lysosome);04210(Apoptosis)	K01275	EC:3.4.14.1
1	ENSDARG00000087623	BX649485.1	2.08204	1.31946	0.658054	0	0	NA	NA	NA	NA	NA
1	ENSDARG00000040072	scpep1	2.32041	1.47613	0.652558	0	0	serine carboxypeptidase 1 [Source:ZFIN;Acc:ZDB-GENE-040426-890]	GO:0004180(carboxypeptidase activity);GO:0004185(serine-type carboxypeptidase activity);GO:0005575(cellular_component);GO:0006508(proteolysis);GO:0008233(peptidase activity);GO:0016787(hydrolase activity);GO:0051603(proteolysis involved in cellular protein catabolic process)	NA	K09646	EC:3.4.16.-
1	ENSDARG00000007018	ms4a17a.6	1.31485	0.836968	0.651654	0	0	membrane-spanning 4-domains, subfamily A, member 17A.6 [Source:ZFIN;Acc:ZDB-GENE-070209-265]	GO:0016020(membrane);GO:0016021(integral component of membrane)	NA	K22190	NA
1	ENSDARG00000003931	cndp2	1.15034	0.734779	0.646674	0	0	carnosine dipeptidase 2 [Source:ZFIN;Acc:ZDB-GENE-030131-5499]	GO:0005575(cellular_component);GO:0006508(proteolysis);GO:0008237(metallopeptidase activity);GO:0016787(hydrolase activity);GO:0016805(dipeptidase activity);GO:0046872(metal ion binding)	00330(Arginine and proline metabolism);00340(Histidine metabolism);00410(beta-Alanine metabolism)	K08660	EC:3.4.13.18
1	ENSDARG00000057121	c7b	0.944132	0.603767	0.644996	0	0	complement component 7b [Source:ZFIN;Acc:ZDB-GENE-021120-1]	GO:0005515(protein binding);GO:0005579(membrane attack complex);GO:0006955(immune response);GO:0006956(complement activation)	NA	NA	NA
1	ENSDARG00000036427	slc3a2a	0.988836	0.634328	0.640503	0	0	solute carrier family 3 (amino acid transporter heavy chain), member 2a [Source:ZFIN;Acc:ZDB-GENE-000831-3]	GO:0003824(catalytic activity);GO:0005975(carbohydrate metabolic process);GO:0060142(regulation of syncytium formation by plasma membrane fusion)	04150(mTOR signaling pathway);04216(Ferroptosis)	K06519	NA
1	ENSDARG00000096979	NPC2 (1 of many)	1.12685	0.725072	0.636099	0	0	zgc:193725 [Source:ZFIN;Acc:ZDB-GENE-080723-11]	GO:0005623(cell);GO:0032367(intracellular cholesterol transport)	NA	NA	NA
1	ENSDARG00000090625	si:ch73-248e21.1	3.31792	2.14011	0.632595	0	0	si:ch73-248e21.1 [Source:ZFIN;Acc:ZDB-GENE-120215-198]	NA	NA	NA	NA
1	ENSDARG00000012369	rdh10b	1.3991	0.904969	0.628554	0	0	retinol dehydrogenase 10b [Source:ZFIN;Acc:ZDB-GENE-030909-7]	GO:0002138(retinoic acid biosynthetic process);GO:0005783(endoplasmic reticulum);GO:0005789(endoplasmic reticulum membrane);GO:0005811(lipid droplet);GO:0016020(membrane);GO:0016021(integral component of membrane);GO:0016491(oxidoreductase activity);GO:0031090(organelle membrane);GO:0042572(retinol metabolic process);GO:0043231(intracellular membrane-bounded organelle);GO:0052650(NADP-retinol deh…	00830(Retinol metabolism)	K11151	EC:1.1.1.-
1	ENSDARG00000055504	si:ch211-212k18.7	4.49347	2.91081	0.626408	0	0	si:ch211-212k18.7 [Source:ZFIN;Acc:ZDB-GENE-030131-1312]	GO:0005764(lysosome);GO:0005765(lysosomal membrane);GO:0016020(membrane);GO:0016021(integral component of membrane)	04142(Lysosome)	K06501	NA
1	ENSDARG00000079009	abca1b	0.951131	0.617683	0.622778	0	0	ATP-binding cassette, sub-family A (ABC1), member 1B [Source:ZFIN;Acc:ZDB-GENE-030131-9826]	GO:0000166(nucleotide binding);GO:0005319(lipid transporter activity);GO:0005524(ATP binding);GO:0006869(lipid transport);GO:0016020(membrane);GO:0016021(integral component of membrane);GO:0016887(ATPase activity);GO:0017127(cholesterol transporter activity);GO:0030301(cholesterol transport);GO:0033700(phospholipid efflux);GO:0042626(ATPase activity, coupled to transmembrane movement of substance…	02010(ABC transporters)	K05641	NA
1	ENSDARG00000076789	cx32.2	0.868647	0.566409	0.616926	0	0	connexin 32.2 [Source:ZFIN;Acc:ZDB-GENE-050303-1]	GO:0005886(plasma membrane);GO:0005921(gap junction);GO:0005922(connexin complex);GO:0007154(cell communication);GO:0016020(membrane);GO:0016021(integral component of membrane);GO:0030054(cell junction)	NA	K07612	NA
1	ENSDARG00000054864	aplp2	1.20638	0.78781	0.614769	0	0	amyloid beta (A4) precursor-like protein 2 [Source:ZFIN;Acc:ZDB-GENE-061009-28]	GO:0004867(serine-type endopeptidase inhibitor activity);GO:0008201(heparin binding);GO:0010951(negative regulation of endopeptidase activity);GO:0016020(membrane);GO:0016021(integral component of membrane);GO:0046914(transition metal ion binding)	NA	K08117	NA
1	ENSDARG00000010794	tfeb	1.21081	0.791073	0.61409	0	0	transcription factor EB [Source:ZFIN;Acc:ZDB-GENE-090807-3]	GO:0006355(regulation of transcription, DNA-templated);GO:0006959(humoral immune response);GO:0045893(positive regulation of transcription, DNA-templated);GO:0046983(protein dimerization activity)	04137(Mitophagy - animal)	K15590	NA
1	ENSDARG00000102249	pepd	1.16303	0.760916	0.612079	0	0	peptidase D [Source:ZFIN;Acc:ZDB-GENE-030131-9444]	GO:0004177(aminopeptidase activity);GO:0005575(cellular_component);GO:0006508(proteolysis);GO:0016787(hydrolase activity);GO:0030145(manganese ion binding);GO:0031018(endocrine pancreas development);GO:0046872(metal ion binding);GO:1990798(pancreas regeneration)	NA	K14213	EC:3.4.13.9
1	ENSDARG00000056804	si:dkey-40g16.6	0.956067	0.626	0.610949	0	0	si:dkey-40g16.6 [Source:ZFIN;Acc:ZDB-GENE-030131-9110]	GO:0001716(L-amino-acid oxidase activity);GO:0009063(cellular amino acid catabolic process);GO:0016491(oxidoreductase activity);GO:0055114(oxidation-reduction process)	00250(Alanine, aspartate and glutamate metabolism);00270(Cysteine and methionine metabolism);00280(Valine, leucine and isoleucine degradation);00350(Tyrosine metabolism);00360(Phenylalanine metabolism);00380(Tryptophan metabolism);00400(Phenylalanine, tyrosine and tryptophan biosynthesis)	K03334	EC:1.4.3.2
1	ENSDARG00000031136	moxd1	0.888106	0.583893	0.605027	0	0	monooxygenase, DBH-like 1 [Source:ZFIN;Acc:ZDB-GENE-030131-9320]	GO:0003824(catalytic activity);GO:0004497(monooxygenase activity);GO:0004500(dopamine beta-monooxygenase activity);GO:0005507(copper ion binding);GO:0005615(extracellular space);GO:0005737(cytoplasm);GO:0005783(endoplasmic reticulum);GO:0005789(endoplasmic reticulum membrane);GO:0006589(octopamine biosynthetic process);GO:0016020(membrane);GO:0016021(integral component of membrane);GO:0016491(oxi…	NA	NA	NA
1	ENSDARG00000041799	cx43	0.936575	0.619076	0.597279	0	0	connexin 43 [Source:ZFIN;Acc:ZDB-GENE-991105-4]	GO:0005243(gap junction channel activity);GO:0005515(protein binding);GO:0005739(mitochondrion);GO:0005886(plasma membrane);GO:0005921(gap junction);GO:0005922(connexin complex);GO:0007154(cell communication);GO:0007267(cell-cell signaling);GO:0007275(multicellular organism development);GO:0007507(heart development);GO:0008283(cell population proliferation);GO:0014704(intercalated disc);GO:001602…	04540(Gap junction)	K07372	NA
1	ENSDARG00000053091	si:ch211-204c21.1.1	0.961824	0.636693	0.595174	0	0	si:ch211-204c21.1 [Source:ZFIN;Acc:ZDB-GENE-030429-35]	GO:0005515(protein binding)	04144(Endocytosis)	K12475	NA
1	ENSDARG00000098012	itgae.1	0.840766	0.556938	0.594188	0	0	integrin, alpha E, tandem duplicate 1 [Source:ZFIN;Acc:ZDB-GENE-131121-125]	NA	NA	NA	NA
1	ENSDARG00000102106	tgm1l1	1.21475	0.808516	0.587315	0	0	transglutaminase 1 like 1 [Source:ZFIN;Acc:ZDB-GENE-060503-139]	GO:0003810(protein-glutamine gamma-glutamyltransferase activity);GO:0018149(peptide cross-linking);GO:0046872(metal ion binding)	NA	K05619	EC:2.3.2.13
1	ENSDARG00000043511	prdx6	3.32908	2.22297	0.582633	0	0	peroxiredoxin 6 [Source:ZFIN;Acc:ZDB-GENE-040426-1778]	GO:0004601(peroxidase activity);GO:0005515(protein binding);GO:0005829(cytosol);GO:0006979(response to oxidative stress);GO:0016209(antioxidant activity);GO:0016491(oxidoreductase activity);GO:0034599(cellular response to oxidative stress);GO:0042744(hydrogen peroxide catabolic process);GO:0045454(cell redox homeostasis);GO:0051920(peroxiredoxin activity);GO:0055114(oxidation-reduction process);G…	NA	NA	NA
1	ENSDARG00000075718	rpz5	2.03838	1.36255	0.581114	0	0	rapunzel 5 [Source:ZFIN;Acc:ZDB-GENE-030131-4678]	NA	NA	NA	NA
1	ENSDARG00000097032	si:ch211-256a21.4	2.03196	1.36116	0.578034	0	0	si:ch211-256a21.4 [Source:ZFIN;Acc:ZDB-GENE-131121-329]	GO:0016020(membrane);GO:0016021(integral component of membrane)	NA	NA	NA
1	ENSDARG00000077360	fthl30	1.0249	0.688599	0.573745	0	0	ferritin, heavy polypeptide-like 30 [Source:ZFIN;Acc:ZDB-GENE-071004-57]	GO:0004322(ferroxidase activity);GO:0005506(iron ion binding);GO:0005737(cytoplasm);GO:0006826(iron ion transport);GO:0006879(cellular iron ion homeostasis);GO:0006880(intracellular sequestering of iron ion);GO:0008198(ferrous iron binding);GO:0008199(ferric iron binding);GO:0042802(identical protein binding);GO:0046872(metal ion binding);GO:0055114(oxidation-reduction process)	NA	NA	NA
1	ENSDARG00000102640	pdia3	4.51077	3.04431	0.56726	0	0	protein disulfide isomerase family A, member 3 [Source:ZFIN;Acc:ZDB-GENE-031002-9]	GO:0003756(protein disulfide isomerase activity);GO:0005783(endoplasmic reticulum);GO:0006457(protein folding);GO:0009986(cell surface);GO:0016853(isomerase activity);GO:0034976(response to endoplasmic reticulum stress);GO:0045454(cell redox homeostasis)	04141(Protein processing in endoplasmic reticulum);05168(Herpes simplex virus 1 infection)	K08056	EC:5.3.4.1
1	ENSDARG00000024789	mxc	0.949826	0.64113	0.567045	0	0	myxovirus (influenza virus) resistance C [Source:ZFIN;Acc:ZDB-GENE-030721-7]	GO:0000166(nucleotide binding);GO:0000266(mitochondrial fission);GO:0003374(dynamin family protein polymerization involved in mitochondrial fission);GO:0003924(GTPase activity);GO:0005525(GTP binding);GO:0005737(cytoplasm);GO:0008017(microtubule binding);GO:0009615(response to virus);GO:0016020(membrane);GO:0031966(mitochondrial membrane);GO:0043330(response to exogenous dsRNA);GO:0061025(membran…	NA	NA	NA
1	ENSDARG00000099313	naga	1.70531	1.15212	0.565747	0	0	N-acetylgalactosaminidase, alpha [Source:ZFIN;Acc:ZDB-GENE-051113-256]	GO:0003824(catalytic activity);GO:0004553(hydrolase activity, hydrolyzing O-glycosyl compounds);GO:0004557(alpha-galactosidase activity);GO:0005737(cytoplasm);GO:0005975(carbohydrate metabolic process);GO:0008152(metabolic process);GO:0009311(oligosaccharide metabolic process);GO:0016139(glycoside catabolic process);GO:0016787(hydrolase activity);GO:0016798(hydrolase activity, acting on glycosyl …	00603(Glycosphingolipid biosynthesis - globo and isoglobo series);04142(Lysosome)	K01204	EC:3.2.1.49
1	ENSDARG00000031681	atp6v0b	1.62847	1.10038	0.565517	0	0	ATPase H+ transporting V0 subunit b [Source:ZFIN;Acc:ZDB-GENE-030131-443]	GO:0006811(ion transport);GO:0015078(proton transmembrane transporter activity);GO:0015991(ATP hydrolysis coupled proton transport);GO:0016020(membrane);GO:0016021(integral component of membrane);GO:0033177(proton-transporting two-sector ATPase complex, proton-transporting domain);GO:0033179(proton-transporting V-type ATPase, V0 domain);GO:0046961(proton-transporting ATPase activity, rotational m…	00190(Oxidative phosphorylation);04142(Lysosome);04145(Phagosome)	K03661	NA
1	ENSDARG00000076586	csf2rb	1.45153	0.985853	0.558134	0	0	colony stimulating factor 2 receptor, beta, low-affinity (granulocyte-macrophage) [Source:ZFIN;Acc:ZDB-GENE-080115-1]	GO:0005515(protein binding);GO:0016020(membrane);GO:0016021(integral component of membrane)	04060(Cytokine-cytokine receptor interaction);04210(Apoptosis)	K04738	NA
1	ENSDARG00000077239	si:ch211-165i18.2	0.748876	0.509669	0.555166	0	0	si:ch211-165i18.2 [Source:NCBI gene;Acc:100149646]	GO:0003676(nucleic acid binding);GO:0004519(endonuclease activity);GO:0016787(hydrolase activity);GO:0046872(metal ion binding);GO:0090305(nucleic acid phosphodiester bond hydrolysis)	NA	K15049	NA
1	ENSDARG00000069461	rnaseka	2.79319	1.90466	0.552376	0	0	ribonuclease, RNase K a [Source:ZFIN;Acc:ZDB-GENE-060825-301]	GO:0004518(nuclease activity);GO:0004519(endonuclease activity);GO:0004521(endoribonuclease activity);GO:0005575(cellular_component);GO:0016020(membrane);GO:0016021(integral component of membrane);GO:0016787(hydrolase activity);GO:0090305(nucleic acid phosphodiester bond hydrolysis);GO:0090502(RNA phosphodiester bond hydrolysis, endonucleolytic)	NA	NA	NA
1	ENSDARG00000021987	plecb	1.68029	1.14783	0.549799	0	0	plectin b [Source:ZFIN;Acc:ZDB-GENE-100917-2]	GO:0003779(actin binding);GO:0005198(structural molecule activity);GO:0005200(structural constituent of cytoskeleton);GO:0005515(protein binding);GO:0005737(cytoplasm);GO:0005856(cytoskeleton);GO:0005882(intermediate filament);GO:0005925(focal adhesion);GO:0007010(cytoskeleton organization);GO:0007519(skeletal muscle tissue development);GO:0007626(locomotory behavior);GO:0008092(cytoskeletal prot…	NA	K10388	NA
1	ENSDARG00000088612	si:ch211-153b23.7	3.11205	2.12972	0.547202	0	0	si:ch211-153b23.7 [Source:ZFIN;Acc:ZDB-GENE-141216-14]	GO:0002755(MyD88-dependent toll-like receptor signaling pathway);GO:0043124(negative regulation of I-kappaB kinase/NF-kappaB signaling);GO:0050727(regulation of inflammatory response);GO:0070373(negative regulation of ERK1 and ERK2 cascade)	NA	NA	NA
1	ENSDARG00000079497	tcima	0.950777	0.650765	0.54697	0	0	transcriptional and immune response regulator a [Source:ZFIN;Acc:ZDB-GENE-050320-36]	GO:0002264(endothelial cell activation involved in immune response);GO:0005112(Notch binding);GO:0005575(cellular_component);GO:0005634(nucleus);GO:0005829(cytosol);GO:0008150(biological_process);GO:0045746(negative regulation of Notch signaling pathway)	NA	NA	NA
1	ENSDARG00000034173	prkcq	0.836979	0.574828	0.542061	0	0	protein kinase C, theta [Source:ZFIN;Acc:ZDB-GENE-041210-195]	GO:0000166(nucleotide binding);GO:0004672(protein kinase activity);GO:0004674(protein serine/threonine kinase activity);GO:0004697(protein kinase C activity);GO:0005524(ATP binding);GO:0006468(protein phosphorylation);GO:0016301(kinase activity);GO:0016310(phosphorylation);GO:0016740(transferase activity);GO:0018105(peptidyl-serine phosphorylation);GO:0035556(intracellular signal transduction);GO…	04140(Autophagy - animal);04270(Vascular smooth muscle contraction);04920(Adipocytokine signaling pathway)	K18052	EC:2.7.11.13
1	ENSDARG00000023290	fabp3	5.12787	3.538	0.535425	0	0	fatty acid binding protein 3, muscle and heart [Source:ZFIN;Acc:ZDB-GENE-020318-2]	GO:0001947(heart looping);GO:0007507(heart development);GO:0008289(lipid binding);GO:0043009(chordate embryonic development)	03320(PPAR signaling pathway)	K08752	NA
1	ENSDARG00000006251	ell2	1.58293	1.09626	0.530011	0	0	elongation factor, RNA polymerase II, 2 [Source:ZFIN;Acc:ZDB-GENE-030131-1717]	GO:0006368(transcription elongation from RNA polymerase II promoter);GO:0008023(transcription elongation factor complex)	NA	K15183	NA
1	ENSDARG00000070378	ccl35.2	1.96078	1.36416	0.523417	0	0	chemokine (C-C motif) ligand 35, duplicate 2 [Source:ZFIN;Acc:ZDB-GENE-140718-1]	GO:0002548(monocyte chemotaxis);GO:0005576(extracellular region);GO:0005615(extracellular space);GO:0006954(inflammatory response);GO:0006955(immune response);GO:0007186(G protein-coupled receptor signaling pathway);GO:0008009(chemokine activity);GO:0030593(neutrophil chemotaxis);GO:0043547(positive regulation of GTPase activity);GO:0048020(CCR chemokine receptor binding);GO:0048247(lymphocyte ch…	NA	NA	NA
1	ENSDARG00000027750	dpp7	0.961066	0.672635	0.514812	0	0	dipeptidyl-peptidase 7 [Source:ZFIN;Acc:ZDB-GENE-050306-16]	GO:0006508(proteolysis);GO:0008236(serine-type peptidase activity);GO:0008239(dipeptidyl-peptidase activity);GO:0031982(vesicle)	NA	K01276	EC:3.4.14.2
1	ENSDARG00000040251	ctsk	0.774161	0.541889	0.514636	0	0	cathepsin K [Source:ZFIN;Acc:ZDB-GENE-001205-4]	GO:0004197(cysteine-type endopeptidase activity);GO:0005615(extracellular space);GO:0005764(lysosome);GO:0006508(proteolysis);GO:0008233(peptidase activity);GO:0008234(cysteine-type peptidase activity);GO:0009612(response to mechanical stimulus);GO:0016787(hydrolase activity);GO:0051216(cartilage development);GO:0051603(proteolysis involved in cellular protein catabolic process);GO:0060348(bone d…	04142(Lysosome);04210(Apoptosis);04620(Toll-like receptor signaling pathway)	K01371	EC:3.4.22.38
1	ENSDARG00000030053	eef1db	9.27416	6.49579	0.513711	0	0	eukaryotic translation elongation factor 1 delta b (guanine nucleotide exchange protein) [Source:ZFIN;Acc:ZDB-GENE-030131-6544]	GO:0003746(translation elongation factor activity);GO:0005853(eukaryotic translation elongation factor 1 complex);GO:0006412(translation);GO:0006414(translational elongation)	NA	K15410	NA
1	ENSDARG00000102299	cxcl8b.1	0.78668	0.552867	0.508845	0	0	chemokine (C-X-C motif) ligand 8b, duplicate 1 [Source:ZFIN;Acc:ZDB-GENE-101026-3]	GO:0002523(leukocyte migration involved in inflammatory response);GO:0005576(extracellular region);GO:0005615(extracellular space);GO:0006935(chemotaxis);GO:0006952(defense response);GO:0006954(inflammatory response);GO:0006955(immune response);GO:0008009(chemokine activity);GO:0009611(response to wounding);GO:0009617(response to bacterium);GO:0030593(neutrophil chemotaxis);GO:0030595(leukocyte c…	NA	NA	NA
1	ENSDARG00000068432	si:dkey-56m19.5	0.927074	0.652143	0.507496	0	0	si:dkey-56m19.5 [Source:ZFIN;Acc:ZDB-GENE-030131-226]	NA	NA	NA	NA
1	ENSDARG00000056378	ifi30	2.37784	1.67413	0.506244	0	0	interferon, gamma-inducible protein 30 [Source:ZFIN;Acc:ZDB-GENE-030131-8447]	GO:0002376(immune system process);GO:0005576(extracellular region);GO:0005764(lysosome);GO:0016491(oxidoreductase activity);GO:0047134(protein-disulfide reductase activity);GO:0055114(oxidation-reduction process)	NA	NA	NA
1	ENSDARG00000076573	si:dkey-88j15.3	0.719496	0.509504	0.497892	0	0	si:dkey-88j15.3 [Source:ZFIN;Acc:ZDB-GENE-100922-28]	GO:0005525(GTP binding)	NA	NA	NA
1	ENSDARG00000076318	atp6v1ab	0.832871	0.590438	0.496307	0	0	ATPase H+ transporting V1 subunit Ab [Source:ZFIN;Acc:ZDB-GENE-030131-9529]	GO:0005524(ATP binding);GO:0005774(vacuolar membrane);GO:0005886(plasma membrane);GO:0015991(ATP hydrolysis coupled proton transport);GO:0016324(apical plasma membrane);GO:0033180(proton-transporting V-type ATPase, V1 domain);GO:0046034(ATP metabolic process);GO:0046961(proton-transporting ATPase activity, rotational mechanism);GO:1902600(proton transmembrane transport)	00190(Oxidative phosphorylation);04145(Phagosome);04150(mTOR signaling pathway)	K02145	EC:7.1.2.2
1	ENSDARG00000035719	arl5c	4.54776	3.22552	0.495623	0	0	ADP-ribosylation factor-like 5C [Source:ZFIN;Acc:ZDB-GENE-040426-1866]	GO:0000166(nucleotide binding);GO:0005525(GTP binding);GO:0005737(cytoplasm);GO:0005802(trans-Golgi network);GO:0006886(intracellular protein transport);GO:0016192(vesicle-mediated transport);GO:1903292(protein localization to Golgi membrane)	NA	NA	NA
1	ENSDARG00000108953	si:ch211-283g2.2	0.636595	0.453722	0.488568	0	0	si:ch211-283g2.2 [Source:ZFIN;Acc:ZDB-GENE-060526-151]	GO:0030246(carbohydrate binding)	NA	NA	NA
1	ENSDARG00000070542	mafbb	0.68123	0.485624	0.488303	0	0	v-maf avian musculoaponeurotic fibrosarcoma oncogene homolog Bb [Source:ZFIN;Acc:ZDB-GENE-010605-4]	GO:0000978(RNA polymerase II proximal promoter sequence-specific DNA binding);GO:0003677(DNA binding);GO:0003700(DNA-binding transcription factor activity);GO:0005634(nucleus);GO:0006355(regulation of transcription, DNA-templated);GO:0043565(sequence-specific DNA binding)	NA	NA	NA
1	ENSDARG00000080010	adh5	2.51902	1.80313	0.482357	0	0	alcohol dehydrogenase 5 [Source:ZFIN;Acc:ZDB-GENE-011003-1]	GO:0004024(alcohol dehydrogenase activity, zinc-dependent);GO:0005829(cytosol);GO:0006069(ethanol oxidation);GO:0008270(zinc ion binding);GO:0016491(oxidoreductase activity);GO:0046294(formaldehyde catabolic process);GO:0046872(metal ion binding);GO:0051903(S-(hydroxymethyl)glutathione dehydrogenase activity);GO:0055114(oxidation-reduction process)	00010(Glycolysis / Gluconeogenesis);00071(Fatty acid degradation);00350(Tyrosine metabolism);00830(Retinol metabolism);00980(Metabolism of xenobiotics by cytochrome P450);00982(Drug metabolism - cytochrome P450)	K00121	1.1.1.1;EC:1.1.1.284
1	ENSDARG00000034534	atp6v1aa	1.07741	0.771508	0.481811	0	0	ATPase H+ transporting V1 subunit Aa [Source:ZFIN;Acc:ZDB-GENE-040426-1143]	GO:0005524(ATP binding);GO:0005774(vacuolar membrane);GO:0005886(plasma membrane);GO:0006874(cellular calcium ion homeostasis);GO:0006883(cellular sodium ion homeostasis);GO:0015078(proton transmembrane transporter activity);GO:0015991(ATP hydrolysis coupled proton transport);GO:0016324(apical plasma membrane);GO:0033180(proton-transporting V-type ATPase, V1 domain);GO:0046034(ATP metabolic proce…	00190(Oxidative phosphorylation);04145(Phagosome);04150(mTOR signaling pathway)	K02145	EC:7.1.2.2
1	ENSDARG00000079932	zgc:152830	0.860402	0.616635	0.480594	0	0	zgc:152830 [Source:ZFIN;Acc:ZDB-GENE-090312-55]	GO:0004177(aminopeptidase activity);GO:0005622(intracellular);GO:0005737(cytoplasm);GO:0006508(proteolysis);GO:0008235(metalloexopeptidase activity);GO:0019538(protein metabolic process);GO:0030145(manganese ion binding)	00480(Glutathione metabolism)	K01255	EC:3.4.11.1
1	ENSDARG00000009390	npl	1.89363	1.35778	0.479908	0	0	N-acetylneuraminate pyruvate lyase (dihydrodipicolinate synthase) [Source:ZFIN;Acc:ZDB-GENE-030131-926]	GO:0003824(catalytic activity);GO:0016829(lyase activity)	00520(Amino sugar and nucleotide sugar metabolism)	K01639	EC:4.1.3.3
1	ENSDARG00000036893	f13a1b	0.981963	0.706277	0.475434	0	0	coagulation factor XIII, A1 polypeptide b [Source:ZFIN;Acc:ZDB-GENE-030131-9634]	GO:0003810(protein-glutamine gamma-glutamyltransferase activity);GO:0005575(cellular_component);GO:0018149(peptide cross-linking);GO:0046872(metal ion binding);GO:0072378(blood coagulation, fibrin clot formation)	NA	NA	NA
1	ENSDARG00000098114	ctsa	1.13272	0.814929	0.475039	0	0	cathepsin A [Source:ZFIN;Acc:ZDB-GENE-030131-537]	GO:0004180(carboxypeptidase activity);GO:0004185(serine-type carboxypeptidase activity);GO:0006508(proteolysis);GO:0008233(peptidase activity);GO:0016787(hydrolase activity);GO:0051603(proteolysis involved in cellular protein catabolic process)	04142(Lysosome)	K13289	EC:3.4.16.5
1	ENSDARG00000102211	csf3a	0.768031	0.554902	0.468933	0	0	colony stimulating factor 3 (granulocyte) a [Source:ZFIN;Acc:ZDB-GENE-091229-1]	GO:0005125(cytokine activity);GO:0010469(regulation of signaling receptor activity);GO:0030099(myeloid cell differentiation);GO:0030223(neutrophil differentiation);GO:0030225(macrophage differentiation);GO:0035162(embryonic hemopoiesis);GO:0045639(positive regulation of myeloid cell differentiation);GO:0060218(hematopoietic stem cell differentiation);GO:0061515(myeloid cell development);GO:007142…	NA	NA	NA
1	ENSDARG00000004405	snx10a	1.07378	0.780084	0.460995	0	0	sorting nexin 10a [Source:ZFIN;Acc:ZDB-GENE-050809-44]	GO:0001947(heart looping);GO:0005737(cytoplasm);GO:0005768(endosome);GO:0005813(centrosome);GO:0005815(microtubule organizing center);GO:0005856(cytoskeleton);GO:0008289(lipid binding);GO:0010008(endosome membrane);GO:0015031(protein transport);GO:0016020(membrane);GO:0030030(cell projection organization);GO:0035091(phosphatidylinositol binding);GO:0060271(cilium assembly);GO:0061512(protein loca…	NA	K17924	NA
1	ENSDARG00000021669	sec61a1	2.58837	1.88472	0.457688	0	0	Sec61 translocon alpha 1 subunit [Source:ZFIN;Acc:ZDB-GENE-020418-2]	GO:0005048(signal sequence binding);GO:0005783(endoplasmic reticulum);GO:0005784(Sec61 translocon complex);GO:0005789(endoplasmic reticulum membrane);GO:0006616(SRP-dependent cotranslational protein targeting to membrane, translocation);GO:0006620(posttranslational protein targeting to endoplasmic reticulum membrane);GO:0007275(multicellular organism development);GO:0008320(protein transmembrane …	03060(Protein export);04141(Protein processing in endoplasmic reticulum);04145(Phagosome)	K10956	NA
1	ENSDARG00000008735	atp6ap2	2.84632	2.07386	0.456779	0	0	ATPase H+ transporting accessory protein 2 [Source:ZFIN;Acc:ZDB-GENE-040426-1960]	GO:0016020(membrane);GO:0016021(integral component of membrane);GO:0035622(intrahepatic bile duct development);GO:0038023(signaling receptor activity)	NA	NA	NA
1	ENSDARG00000019556	clcn7	0.910645	0.665842	0.451709	0	0	chloride channel 7 [Source:ZFIN;Acc:ZDB-GENE-061103-196]	GO:0005247(voltage-gated chloride channel activity);GO:0005515(protein binding);GO:0005654(nucleoplasm);GO:0006811(ion transport);GO:0006821(chloride transport);GO:0009268(response to pH);GO:0016020(membrane);GO:0016021(integral component of membrane);GO:0031410(cytoplasmic vesicle);GO:0055085(transmembrane transport);GO:1902476(chloride transmembrane transport)	NA	K05016	NA
1	ENSDARG00000003599	rpl3	31.3798	23.0234	0.446736	0	0	ribosomal protein L3 [Source:ZFIN;Acc:ZDB-GENE-030131-1291]	GO:0000027(ribosomal large subunit assembly);GO:0003735(structural constituent of ribosome);GO:0005622(intracellular);GO:0005840(ribosome);GO:0006412(translation);GO:0022625(cytosolic large ribosomal subunit);GO:0031017(exocrine pancreas development)	03010(Ribosome)	K02925	NA
1	ENSDARG00000017504	si:ch211-1o7.3	0.613127	0.45264	0.437822	0	0	si:ch211-1o7.3 [Source:ZFIN;Acc:ZDB-GENE-130530-561]	NA	NA	NA	NA
1	ENSDARG00000077664	zgc:110239	1.10363	0.818892	0.430509	0	0	zgc:110239 [Source:ZFIN;Acc:ZDB-GENE-050417-107]	GO:0004197(cysteine-type endopeptidase activity);GO:0005615(extracellular space);GO:0005764(lysosome);GO:0006508(proteolysis);GO:0008233(peptidase activity);GO:0008234(cysteine-type peptidase activity);GO:0016787(hydrolase activity);GO:0051603(proteolysis involved in cellular protein catabolic process)	NA	NA	NA
1	ENSDARG00000046157	RPS17	31.6443	23.5751	0.424678	0	0	zgc:114188 [Source:ZFIN;Acc:ZDB-GENE-050320-15]	GO:0003735(structural constituent of ribosome);GO:0005622(intracellular);GO:0005840(ribosome);GO:0006412(translation)	03010(Ribosome)	K02962	NA
1	ENSDARG00000078363	mcoln3a	0.63612	0.474776	0.422053	0	0	mucolipin 3a [Source:ZFIN;Acc:ZDB-GENE-121116-4]	GO:0005261(cation channel activity);GO:0005765(lysosomal membrane);GO:0005886(plasma membrane);GO:0016020(membrane);GO:0016021(integral component of membrane);GO:0034220(ion transmembrane transport);GO:0051209(release of sequestered calcium ion into cytosol);GO:0072345(NAADP-sensitive calcium-release channel activity);GO:0098655(cation transmembrane transport)	NA	K04994	NA
1	ENSDARG00000014165	ssr3	4.7643	3.55602	0.422002	0	0	signal sequence receptor, gamma [Source:ZFIN;Acc:ZDB-GENE-030131-9134]	GO:0005623(cell);GO:0006614(SRP-dependent cotranslational protein targeting to membrane);GO:0016020(membrane);GO:0016021(integral component of membrane)	04141(Protein processing in endoplasmic reticulum)	K13251	NA
1	ENSDARG00000052746	grinab	0.985502	0.736332	0.420502	0	0	glutamate receptor, ionotropic, N-methyl D-aspartate-associated protein 1b (glutamate binding) [Source:ZFIN;Acc:ZDB-GENE-040426-1367]	GO:0016020(membrane);GO:0016021(integral component of membrane);GO:0043066(negative regulation of apoptotic process);GO:1901215(negative regulation of neuron death)	NA	K06890	NA
1	ENSDARG00000061579	myo1cb	0.87283	0.655906	0.412211	0	0	myosin Ic, paralog b [Source:ZFIN;Acc:ZDB-GENE-090429-3]	GO:0000166(nucleotide binding);GO:0003774(motor activity);GO:0003779(actin binding);GO:0005515(protein binding);GO:0005524(ATP binding);GO:0016459(myosin complex);GO:0032835(glomerulus development)	NA	K10356	NA
1	ENSDARG00000010244	rpl22l1	12.7837	9.61612	0.410776	0	0	ribosomal protein L22-like 1 [Source:ZFIN;Acc:ZDB-GENE-060804-3]	GO:0003723(RNA binding);GO:0003735(structural constituent of ribosome);GO:0005622(intracellular);GO:0005840(ribosome);GO:0006412(translation);GO:0022625(cytosolic large ribosomal subunit);GO:0060216(definitive hemopoiesis)	03010(Ribosome)	K02891	NA
1	ENSDARG00000031100	ivns1abpa	1.26723	0.953741	0.41001	0	0	influenza virus NS1A binding protein a [Source:ZFIN;Acc:ZDB-GENE-031222-2]	GO:0005515(protein binding);GO:0005634(nucleus);GO:0005737(cytoplasm);GO:0005856(cytoskeleton);GO:0015629(actin cytoskeleton)	NA	NA	NA
1	ENSDARG00000058451	rpl6	27.7365	20.8884	0.409084	0	0	ribosomal protein L6 [Source:ZFIN;Acc:ZDB-GENE-030131-8671]	GO:0000027(ribosomal large subunit assembly);GO:0002181(cytoplasmic translation);GO:0003723(RNA binding);GO:0003735(structural constituent of ribosome);GO:0005622(intracellular);GO:0005840(ribosome);GO:0006412(translation);GO:0022625(cytosolic large ribosomal subunit);GO:0031016(pancreas development);GO:0043009(chordate embryonic development)	03010(Ribosome)	K02934	NA
1	ENSDARG00000100371	eef2b	24.9096	18.8019	0.405818	0	0	eukaryotic translation elongation factor 2b [Source:ZFIN;Acc:ZDB-GENE-030131-5128]	GO:0003746(translation elongation factor activity);GO:0003924(GTPase activity);GO:0005525(GTP binding);GO:0005829(cytosol);GO:0006414(translational elongation);GO:0043009(chordate embryonic development);GO:0043022(ribosome binding);GO:0071466(cellular response to xenobiotic stimulus);GO:1990904(ribonucleoprotein complex)	NA	K03234	NA
1	ENSDARG00000029018	cdkn1ba	0.614006	0.464656	0.40209	0	0	cyclin-dependent kinase inhibitor 1Ba [Source:ZFIN;Acc:ZDB-GENE-040812-3]	GO:0000082(G1/S transition of mitotic cell cycle);GO:0004861(cyclin-dependent protein serine/threonine kinase inhibitor activity);GO:0005634(nucleus);GO:0005737(cytoplasm);GO:0007050(cell cycle arrest);GO:0008285(negative regulation of cell population proliferation);GO:0042127(regulation of cell population proliferation);GO:0042326(negative regulation of phosphorylation);GO:0045736(negative regul…	04012(ErbB signaling pathway);04068(FoxO signaling pathway);04110(Cell cycle);04933(AGE-RAGE signaling pathway in diabetic complications)	K06624	NA
1	ENSDARG00000044073	fuca2	1.16222	0.880913	0.399806	0	0	alpha-L-fucosidase 2 [Source:ZFIN;Acc:ZDB-GENE-040822-39]	GO:0004560(alpha-L-fucosidase activity);GO:0005764(lysosome);GO:0005975(carbohydrate metabolic process);GO:0006004(fucose metabolic process);GO:0008152(metabolic process);GO:0016139(glycoside catabolic process);GO:0016787(hydrolase activity);GO:0016798(hydrolase activity, acting on glycosyl bonds)	00511(Other glycan degradation)	K01206	EC:3.2.1.51
1	ENSDARG00000006691	rpl12	59.4758	45.096	0.399306	0	0	ribosomal protein L12 [Source:ZFIN;Acc:ZDB-GENE-030131-5297]	GO:0000027(ribosomal large subunit assembly);GO:0003735(structural constituent of ribosome);GO:0005840(ribosome);GO:0006412(translation);GO:0015934(large ribosomal subunit);GO:0019843(rRNA binding);GO:0022625(cytosolic large ribosomal subunit);GO:0070180(large ribosomal subunit rRNA binding)	03010(Ribosome)	K02870	NA
1	ENSDARG00000056112	pikfyve	0.844281	0.640224	0.399147	0	0	phosphoinositide kinase, FYVE finger containing [Source:ZFIN;Acc:ZDB-GENE-030131-9636]	GO:0000166(nucleotide binding);GO:0000285(1-phosphatidylinositol-3-phosphate 5-kinase activity);GO:0005524(ATP binding);GO:0016020(membrane);GO:0016301(kinase activity);GO:0016307(phosphatidylinositol phosphate kinase activity);GO:0016310(phosphorylation);GO:0016740(transferase activity);GO:0035556(intracellular signal transduction);GO:0046488(phosphatidylinositol metabolic process);GO:0046854(ph…	00562(Inositol phosphate metabolism);04070(Phosphatidylinositol signaling system);04145(Phagosome);04810(Regulation of actin cytoskeleton)	K00921	EC:2.7.1.150
1	ENSDARG00000074695	mertka	0.518619	0.393469	0.398426	0	0	c-mer proto-oncogene tyrosine kinase a [Source:ZFIN;Acc:ZDB-GENE-081107-1]	GO:0000166(nucleotide binding);GO:0004672(protein kinase activity);GO:0004713(protein tyrosine kinase activity);GO:0004714(transmembrane receptor protein tyrosine kinase activity);GO:0005515(protein binding);GO:0005524(ATP binding);GO:0005887(integral component of plasma membrane);GO:0006468(protein phosphorylation);GO:0006909(phagocytosis);GO:0007169(transmembrane receptor protein tyrosine kinas…	NA	K05117	EC:2.7.10.1
1	ENSDARG00000010160	rps15a	48.67	36.9452	0.397646	0	0	ribosomal protein S15a [Source:ZFIN;Acc:ZDB-GENE-030131-8708]	GO:0003735(structural constituent of ribosome);GO:0005840(ribosome);GO:0006412(translation);GO:0007420(brain development);GO:0022627(cytosolic small ribosomal subunit);GO:0030218(erythrocyte differentiation);GO:0043009(chordate embryonic development);GO:0051726(regulation of cell cycle)	03010(Ribosome)	K02957	NA
1	ENSDARG00000060729	trim8b	1.77205	1.34532	0.397464	0	0	tripartite motif containing 8b [Source:ZFIN;Acc:ZDB-GENE-030131-4325]	GO:0005634(nucleus)	NA	NA	NA
1	ENSDARG00000076568	sec61b	3.58981	2.73089	0.394538	0	0	Sec61 translocon beta subunit [Source:ZFIN;Acc:ZDB-GENE-040718-260]	GO:0005086(ARF guanyl-nucleotide exchange factor activity);GO:0005783(endoplasmic reticulum);GO:0005784(Sec61 translocon complex);GO:0006616(SRP-dependent cotranslational protein targeting to membrane, translocation);GO:0006886(intracellular protein transport);GO:0015031(protein transport);GO:0015450(P-P-bond-hydrolysis-driven protein transmembrane transporter activity);GO:0016020(membrane);GO:00…	03060(Protein export);04141(Protein processing in endoplasmic reticulum);04145(Phagosome)	K09481	NA
1	ENSDARG00000005230	ssr2	4.09598	3.12291	0.391317	0	0	signal sequence receptor, beta [Source:ZFIN;Acc:ZDB-GENE-010413-1]	GO:0005783(endoplasmic reticulum);GO:0005789(endoplasmic reticulum membrane);GO:0016020(membrane);GO:0016021(integral component of membrane)	04141(Protein processing in endoplasmic reticulum)	K13250	NA
1	ENSDARG00000005593	rxrga	1.08376	0.828907	0.386757	0	0	retinoid x receptor, gamma a [Source:ZFIN;Acc:ZDB-GENE-980526-36]	NA	03320(PPAR signaling pathway);04920(Adipocytokine signaling pathway)	K08524	NA
1	ENSDARG00000033666	pi4k2a	0.828493	0.633933	0.386161	0	0	phosphatidylinositol 4-kinase type 2 alpha [Source:ZFIN;Acc:ZDB-GENE-040426-2675]	GO:0000166(nucleotide binding);GO:0004430(1-phosphatidylinositol 4-kinase activity);GO:0005524(ATP binding);GO:0005739(mitochondrion);GO:0005768(endosome);GO:0005794(Golgi apparatus);GO:0005802(trans-Golgi network);GO:0005886(plasma membrane);GO:0005887(integral component of plasma membrane);GO:0006661(phosphatidylinositol biosynthetic process);GO:0007030(Golgi organization);GO:0007032(endosome o…	00562(Inositol phosphate metabolism);04070(Phosphatidylinositol signaling system)	K13711	EC:2.7.1.67
1	ENSDARG00000060094	ptgis	0.724365	0.554268	0.386134	0	0	prostaglandin I2 (prostacyclin) synthase [Source:ZFIN;Acc:ZDB-GENE-070116-1]	GO:0001516(prostaglandin biosynthetic process);GO:0004497(monooxygenase activity);GO:0005506(iron ion binding);GO:0005783(endoplasmic reticulum);GO:0005789(endoplasmic reticulum membrane);GO:0006629(lipid metabolic process);GO:0006631(fatty acid metabolic process);GO:0006633(fatty acid biosynthetic process);GO:0006693(prostaglandin metabolic process);GO:0008116(prostaglandin-I synthase activity);…	00590(Arachidonic acid metabolism)	K01831	EC:5.3.99.4
1	ENSDARG00000019815	fn1a	0.503917	0.385731	0.385593	0	0	fibronectin 1a [Source:ZFIN;Acc:ZDB-GENE-000426-1]	GO:0001756(somitogenesis);GO:0001757(somite specification);GO:0002042(cell migration involved in sprouting angiogenesis);GO:0002089(lens morphogenesis in camera-type eye);GO:0003007(heart morphogenesis);GO:0003128(heart field specification);GO:0003146(heart jogging);GO:0003319(cardioblast migration to the midline involved in heart rudiment formation);GO:0005178(integrin binding);GO:0005515(protei…	04510(Focal adhesion);04512(ECM-receptor interaction);04810(Regulation of actin cytoskeleton);04933(AGE-RAGE signaling pathway in diabetic complications)	K05717	NA
1	ENSDARG00000099439	serp1	2.21285	1.69412	0.385373	0	0	stress-associated endoplasmic reticulum protein 1 [Source:ZFIN;Acc:ZDB-GENE-030131-8741]	GO:0005783(endoplasmic reticulum);GO:0005789(endoplasmic reticulum membrane);GO:0006486(protein glycosylation);GO:0015031(protein transport);GO:0016020(membrane);GO:0016021(integral component of membrane);GO:0030968(endoplasmic reticulum unfolded protein response)	NA	NA	NA
1	ENSDARG00000073893	dnase2	0.678745	0.521232	0.380944	0	0	deoxyribonuclease II, lysosomal [Source:ZFIN;Acc:ZDB-GENE-010724-16]	GO:0004531(deoxyribonuclease II activity);GO:0006259(DNA metabolic process);GO:0006309(apoptotic DNA fragmentation)	04142(Lysosome)	K01158	EC:3.1.22.1
1	ENSDARG00000100392	rps18	26.6175	20.4962	0.377017	0	0	ribosomal protein S18 [Source:ZFIN;Acc:ZDB-GENE-020419-20]	GO:0003676(nucleic acid binding);GO:0003723(RNA binding);GO:0003735(structural constituent of ribosome);GO:0005622(intracellular);GO:0005737(cytoplasm);GO:0005829(cytosol);GO:0005840(ribosome);GO:0006412(translation);GO:0007275(multicellular organism development);GO:0019843(rRNA binding);GO:0051726(regulation of cell cycle)	03010(Ribosome)	K02964	NA
1	ENSDARG00000006766	snd1	1.40144	1.08076	0.374865	0	0	staphylococcal nuclease and tudor domain containing 1 [Source:ZFIN;Acc:ZDB-GENE-030131-3124]	GO:0003676(nucleic acid binding);GO:0003723(RNA binding);GO:0004518(nuclease activity);GO:0004521(endoribonuclease activity);GO:0005634(nucleus);GO:0005737(cytoplasm);GO:0006401(RNA catabolic process);GO:0016442(RISC complex);GO:0031047(gene silencing by RNA);GO:0090305(nucleic acid phosphodiester bond hydrolysis);GO:0090502(RNA phosphodiester bond hydrolysis, endonucleolytic)	NA	NA	NA
1	ENSDARG00000061459	si:dkey-253i9.4	1.06967	0.825493	0.37384	0	0	si:dkey-253i9.4 [Source:ZFIN;Acc:ZDB-GENE-090313-280]	GO:0005085(guanyl-nucleotide exchange factor activity);GO:0005096(GTPase activator activity);GO:0005515(protein binding);GO:0005622(intracellular);GO:0007165(signal transduction);GO:0007264(small GTPase mediated signal transduction);GO:0017034(Rap guanyl-nucleotide exchange factor activity);GO:0042127(regulation of cell population proliferation);GO:0043547(positive regulation of GTPase activity)	04010(MAPK signaling pathway);04530(Tight junction)	K08018	NA
1	ENSDARG00000040884	mxi1	0.933368	0.724464	0.365533	0	0	max interactor 1, dimerization protein [Source:ZFIN;Acc:ZDB-GENE-990415-151]	GO:0046983(protein dimerization activity)	NA	K09114	NA
1	ENSDARG00000077717	rpl29	22.8799	17.772	0.364473	0	0	ribosomal protein L29 [Source:ZFIN;Acc:ZDB-GENE-040801-167]	GO:0002181(cytoplasmic translation);GO:0003735(structural constituent of ribosome);GO:0005622(intracellular);GO:0005840(ribosome);GO:0006412(translation);GO:0022625(cytosolic large ribosomal subunit)	03010(Ribosome)	K02905	NA
1	ENSDARG00000067672	card9	1.68118	1.30678	0.363458	0	0	caspase recruitment domain family, member 9 [Source:ZFIN;Acc:ZDB-GENE-060531-94]	GO:0042981(regulation of apoptotic process)	04621(NOD-like receptor signaling pathway);04625(C-type lectin receptor signaling pathway);05168(Herpes simplex virus 1 infection)	K12794	NA
1	ENSDARG00000023920	llgl2	0.665201	0.517219	0.363013	0	0	LLGL scribble cell polarity complex component 2 [Source:ZFIN;Acc:ZDB-GENE-030131-9877]	GO:0005096(GTPase activator activity);GO:0005515(protein binding);GO:0005737(cytoplasm);GO:0005856(cytoskeleton);GO:0005886(plasma membrane);GO:0006887(exocytosis);GO:0007010(cytoskeleton organization);GO:0007049(cell cycle);GO:0008285(negative regulation of cell population proliferation);GO:0008544(epidermis development);GO:0008593(regulation of Notch signaling pathway);GO:0010719(negative regul…	04530(Tight junction)	K06094	NA
1	ENSDARG00000007179	sash1a	0.523288	0.406931	0.362819	0	0	SAM and SH3 domain containing 1a [Source:ZFIN;Acc:ZDB-GENE-030131-9960]	GO:0005515(protein binding)	NA	NA	NA
1	ENSDARG00000030602	rps19	52.3973	40.7665	0.36211	0	0	ribosomal protein S19 [Source:ZFIN;Acc:ZDB-GENE-040426-1716]	GO:0000028(ribosomal small subunit assembly);GO:0003735(structural constituent of ribosome);GO:0005622(intracellular);GO:0005840(ribosome);GO:0006412(translation);GO:0022627(cytosolic small ribosomal subunit);GO:0030218(erythrocyte differentiation);GO:0035284(brain segmentation);GO:0042541(hemoglobin biosynthetic process);GO:0043009(chordate embryonic development);GO:0045088(regulation of innate …	03010(Ribosome)	K02966	NA
1	ENSDARG00000103900	sept9b	0.860077	0.670293	0.359674	0	0	septin 9b [Source:ZFIN;Acc:ZDB-GENE-050327-17]	GO:0000166(nucleotide binding);GO:0003924(GTPase activity);GO:0005525(GTP binding);GO:0005940(septin ring);GO:0015630(microtubule cytoskeleton);GO:0031105(septin complex);GO:0032947(protein-containing complex scaffold activity);GO:0061640(cytoskeleton-dependent cytokinesis)	NA	K16938	NA
1	ENSDARG00000021838	rps23	59.1438	46.1281	0.35858	0	0	ribosomal protein S23 [Source:ZFIN;Acc:ZDB-GENE-080220-50]	GO:0003735(structural constituent of ribosome);GO:0005840(ribosome);GO:0006412(translation);GO:0015935(small ribosomal subunit);GO:0022627(cytosolic small ribosomal subunit)	03010(Ribosome)	K02973	NA
1	ENSDARG00000017772	mdh1aa	2.22663	1.73811	0.357348	0	0	malate dehydrogenase 1Aa, NAD (soluble) [Source:ZFIN;Acc:ZDB-GENE-040204-1]	GO:0003824(catalytic activity);GO:0005829(cytosol);GO:0005975(carbohydrate metabolic process);GO:0006099(tricarboxylic acid cycle);GO:0006107(oxaloacetate metabolic process);GO:0006108(malate metabolic process);GO:0006734(NADH metabolic process);GO:0016491(oxidoreductase activity);GO:0016615(malate dehydrogenase activity);GO:0016616(oxidoreductase activity, acting on the CH-OH group of donors, NA…	00020(Citrate cycle (TCA cycle));00270(Cysteine and methionine metabolism);00620(Pyruvate metabolism);00630(Glyoxylate and dicarboxylate metabolism)	K00025	EC:1.1.1.37
1	ENSDARG00000042725	cebpb	16.0074	12.5185	0.354686	0	0	CCAAT enhancer binding protein beta [Source:ZFIN;Acc:ZDB-GENE-020111-3]	GO:0001878(response to yeast);GO:0003677(DNA binding);GO:0003700(DNA-binding transcription factor activity);GO:0005634(nucleus);GO:0006355(regulation of transcription, DNA-templated);GO:0009617(response to bacterium);GO:0044030(regulation of DNA methylation)	NA	K10048	NA
1	ENSDARG00000008026	fam129bb	0.979673	0.76729	0.352529	0	0	family with sequence similarity 129 member Bb [Source:ZFIN;Acc:ZDB-GENE-030131-6218]	NA	NA	NA	NA
1	ENSDARG00000037307	gnpda1	0.684096	0.535826	0.352436	0	0	glucosamine-6-phosphate deaminase 1 [Source:ZFIN;Acc:ZDB-GENE-050417-417]	GO:0004342(glucosamine-6-phosphate deaminase activity);GO:0005737(cytoplasm);GO:0005975(carbohydrate metabolic process);GO:0006043(glucosamine catabolic process);GO:0006044(N-acetylglucosamine metabolic process);GO:0006046(N-acetylglucosamine catabolic process);GO:0006048(UDP-N-acetylglucosamine biosynthetic process);GO:0016787(hydrolase activity);GO:0019262(N-acetylneuraminate catabolic process)…	00520(Amino sugar and nucleotide sugar metabolism)	K02564	EC:3.5.99.6
1	ENSDARG00000002285	mcoln1a	0.507983	0.398971	0.348497	0	0	mucolipin 1a [Source:ZFIN;Acc:ZDB-GENE-040426-2704]	GO:0001895(retina homeostasis);GO:0005261(cation channel activity);GO:0005764(lysosome);GO:0005765(lysosomal membrane);GO:0005770(late endosome);GO:0005886(plasma membrane);GO:0006914(autophagy);GO:0016020(membrane);GO:0016021(integral component of membrane);GO:0034220(ion transmembrane transport);GO:0035675(neuromast hair cell development);GO:0051209(release of sequestered calcium ion into cytos…	04142(Lysosome)	K04992	NA
1	ENSDARG00000101794	atp6v0e1	2.95013	2.31705	0.348492	0	0	ATPase H+ transporting V0 subunit e1 [Source:ZFIN;Acc:ZDB-GENE-041010-133]	GO:0002181(cytoplasmic translation);GO:0003723(RNA binding);GO:0003735(structural constituent of ribosome);GO:0005622(intracellular);GO:0005840(ribosome);GO:0006412(translation);GO:0006811(ion transport);GO:0007634(optokinetic behavior);GO:0015078(proton transmembrane transporter activity);GO:0015934(large ribosomal subunit);GO:0015991(ATP hydrolysis coupled proton transport);GO:0016020(membrane)…	00190(Oxidative phosphorylation);04145(Phagosome)	K02153	NA
1	ENSDARG00000079895	ehbp1l1b	0.900695	0.707864	0.347566	0	0	EH domain binding protein 1-like 1b [Source:ZFIN;Acc:ZDB-GENE-091204-238]	GO:0005515(protein binding)	NA	NA	NA
1	ENSDARG00000006353	itga5	0.469207	0.368874	0.347097	0	0	integrin, alpha 5 (fibronectin receptor, alpha polypeptide) [Source:ZFIN;Acc:ZDB-GENE-031116-52]	GO:0001501(skeletal system development);GO:0001756(somitogenesis);GO:0001944(vasculature development);GO:0001968(fibronectin binding);GO:0002042(cell migration involved in sprouting angiogenesis);GO:0002089(lens morphogenesis in camera-type eye);GO:0007155(cell adhesion);GO:0007229(integrin-mediated signaling pathway);GO:0008305(integrin complex);GO:0016020(membrane);GO:0016021(integral component…	04145(Phagosome);04510(Focal adhesion);04512(ECM-receptor interaction);04810(Regulation of actin cytoskeleton);05168(Herpes simplex virus 1 infection)	K06484	NA
1	ENSDARG00000038059	grb2b	1.58705	1.24912	0.345435	0	0	growth factor receptor-bound protein 2b [Source:ZFIN;Acc:ZDB-GENE-040426-1975]	GO:0005515(protein binding);GO:0007265(Ras protein signal transduction)	04010(MAPK signaling pathway);04012(ErbB signaling pathway);04068(FoxO signaling pathway);04150(mTOR signaling pathway);04510(Focal adhesion);04540(Gap junction);04910(Insulin signaling pathway);04912(GnRH signaling pathway)	K04364	NA
1	ENSDARG00000054837	zgc:136870	0.424084	0.333869	0.345067	0	0	zgc:136870 [Source:ZFIN;Acc:ZDB-GENE-060312-1]	GO:0005525(GTP binding);GO:0005575(cellular_component);GO:0008150(biological_process)	NA	NA	NA
1	ENSDARG00000011175	atp6v1d	0.809467	0.637561	0.34441	0	0	ATPase H+ transporting V1 subunit D [Source:ZFIN;Acc:ZDB-GENE-040426-727]	GO:0005515(protein binding);GO:0016020(membrane);GO:0042626(ATPase activity, coupled to transmembrane movement of substances);GO:0046961(proton-transporting ATPase activity, rotational mechanism);GO:0055085(transmembrane transport);GO:0060271(cilium assembly);GO:0061512(protein localization to cilium);GO:1902600(proton transmembrane transport)	00190(Oxidative phosphorylation);04145(Phagosome);04150(mTOR signaling pathway)	K02149	NA
1	ENSDARG00000061985	rbm47	0.610359	0.480775	0.344296	0	0	RNA binding motif protein 47 [Source:ZFIN;Acc:ZDB-GENE-030131-9612]	GO:0003676(nucleic acid binding);GO:0003723(RNA binding);GO:0003729(mRNA binding);GO:0005634(nucleus);GO:0016554(cytidine to uridine editing);GO:0060322(head development);GO:2000742(regulation of anterior head development)	NA	NA	NA
1	ENSDARG00000101569	ppargc1b	1.35061	1.06393	0.344215	0	0	peroxisome proliferator-activated receptor gamma, coactivator 1 beta [Source:ZFIN;Acc:ZDB-GENE-030616-43]	GO:0003676(nucleic acid binding);GO:0003712(transcription coregulator activity);GO:0005102(signaling receptor binding);GO:0005634(nucleus);GO:0007005(mitochondrion organization);GO:0008134(transcription factor binding);GO:0030374(nuclear receptor transcription coactivator activity);GO:0045944(positive regulation of transcription by RNA polymerase II);GO:0050873(brown fat cell differentiation);GO:…	NA	K17962	NA
1	ENSDARG00000009418	mef2cb	0.836179	0.659003	0.343528	0	0	myocyte enhancer factor 2cb [Source:ZFIN;Acc:ZDB-GENE-040901-7]	GO:0000790(nuclear chromatin);GO:0000977(RNA polymerase II regulatory region sequence-specific DNA binding);GO:0000978(RNA polymerase II proximal promoter sequence-specific DNA binding);GO:0003143(embryonic heart tube morphogenesis);GO:0003677(DNA binding);GO:0005634(nucleus);GO:0006351(transcription, DNA-templated);GO:0007507(heart development);GO:0042826(histone deacetylase binding);GO:0045944(…	04010(MAPK signaling pathway);04371(Apelin signaling pathway)	K04454	NA
1	ENSDARG00000034368	hexb	1.3698	1.08007	0.342841	0	0	hexosaminidase B (beta polypeptide) [Source:ZFIN;Acc:ZDB-GENE-030131-2333]	GO:0001525(angiogenesis);GO:0004553(hydrolase activity, hydrolyzing O-glycosyl compounds);GO:0004563(beta-N-acetylhexosaminidase activity);GO:0005975(carbohydrate metabolic process);GO:0008152(metabolic process);GO:0016787(hydrolase activity);GO:0016798(hydrolase activity, acting on glycosyl bonds);GO:0102148(N-acetyl-beta-D-galactosaminidase activity)	00511(Other glycan degradation);00520(Amino sugar and nucleotide sugar metabolism);00531(Glycosaminoglycan degradation);00603(Glycosphingolipid biosynthesis - globo and isoglobo series);00604(Glycosphingolipid biosynthesis - ganglio series);04142(Lysosome)	K12373	EC:3.2.1.52
1	ENSDARG00000005451	gdi2	2.80453	2.21237	0.342167	0	0	GDP dissociation inhibitor 2 [Source:ZFIN;Acc:ZDB-GENE-030131-2485]	GO:0005092(GDP-dissociation inhibitor activity);GO:0005093(Rab GDP-dissociation inhibitor activity);GO:0005096(GTPase activator activity);GO:0005737(cytoplasm);GO:0007264(small GTPase mediated signal transduction);GO:0015031(protein transport);GO:0043547(positive regulation of GTPase activity);GO:0050790(regulation of catalytic activity)	NA	K17255	NA
1	ENSDARG00000099885	trim105	0.59582	0.470807	0.339741	0	0	tripartite motif containing 105 [Source:ZFIN;Acc:ZDB-GENE-060810-140]	GO:0005515(protein binding);GO:0005575(cellular_component);GO:0008150(biological_process);GO:0046872(metal ion binding)	NA	NA	NA
1	ENSDARG00000062000	abtb2b	0.441298	0.348857	0.339114	0	0	ankyrin repeat and BTB (POZ) domain containing 2b [Source:ZFIN;Acc:ZDB-GENE-100422-14]	GO:0005515(protein binding);GO:0046982(protein heterodimerization activity)	NA	K10521	NA
1	ENSDARG00000086753	gb:bc139872	0.962154	0.76089	0.338579	0	0	expressed sequence BC139872 [Source:ZFIN;Acc:ZDB-GENE-111013-4]	NA	NA	NA	NA
1	ENSDARG00000019444	ssr4	2.82743	2.23961	0.336243	0	0	signal sequence receptor, delta [Source:ZFIN;Acc:ZDB-GENE-030131-4900]	GO:0005783(endoplasmic reticulum);GO:0016020(membrane);GO:0016021(integral component of membrane);GO:0071391(cellular response to estrogen stimulus)	04141(Protein processing in endoplasmic reticulum)	K04571	NA
1	ENSDARG00000075556	luzp1	0.44277	0.351616	0.332559	0	0	leucine zipper protein 1 [Source:ZFIN;Acc:ZDB-GENE-060810-90]	GO:0003674(molecular_function);GO:0005575(cellular_component);GO:0008150(biological_process)	NA	NA	NA
1	ENSDARG00000009830	hdlbpa	1.74878	1.39216	0.329023	0	0	high density lipoprotein binding protein a [Source:ZFIN;Acc:ZDB-GENE-030131-2032]	GO:0003676(nucleic acid binding);GO:0003723(RNA binding);GO:0071391(cellular response to estrogen stimulus)	NA	NA	NA
1	ENSDARG00000002445	prdm1a	0.450816	0.359027	0.328446	0	0	PR domain containing 1a, with ZNF domain [Source:ZFIN;Acc:ZDB-GENE-030131-2193]	GO:0000122(negative regulation of transcription by RNA polymerase II);GO:0000578(embryonic axis specification);GO:0000977(RNA polymerase II regulatory region sequence-specific DNA binding);GO:0003676(nucleic acid binding);GO:0003700(DNA-binding transcription factor activity);GO:0005515(protein binding);GO:0005634(nucleus);GO:0005737(cytoplasm);GO:0007521(muscle cell fate determination);GO:0010629…	NA	NA	NA
1	ENSDARG00000009401	vcanb	0.398294	0.317608	0.326586	0	0	versican b [Source:ZFIN;Acc:ZDB-GENE-030131-2185]	GO:0001501(skeletal system development);GO:0001957(intramembranous ossification);GO:0005509(calcium ion binding);GO:0005540(hyaluronic acid binding);GO:0007155(cell adhesion);GO:0007417(central nervous system development);GO:0031012(extracellular matrix)	NA	K06794	NA
1	ENSDARG00000037488	canx	1.22932	0.980442	0.326354	0	0	calnexin [Source:ZFIN;Acc:ZDB-GENE-040426-2797]	GO:0005509(calcium ion binding);GO:0005515(protein binding);GO:0005783(endoplasmic reticulum);GO:0006457(protein folding);GO:0016020(membrane);GO:0016021(integral component of membrane);GO:0048916(posterior lateral line development);GO:0051082(unfolded protein binding)	04141(Protein processing in endoplasmic reticulum);04145(Phagosome)	K08054	NA
1	ENSDARG00000036080	cd81a	1.70851	1.36506	0.323771	0	0	CD81 molecule a [Source:ZFIN;Acc:ZDB-GENE-000831-5]	GO:0005887(integral component of plasma membrane);GO:0007166(cell surface receptor signaling pathway);GO:0016020(membrane);GO:0016021(integral component of membrane)	NA	K06508	NA
1	ENSDARG00000005191	ahcy	2.26548	1.81133	0.322762	0	0	adenosylhomocysteinase [Source:ZFIN;Acc:ZDB-GENE-031219-6]	GO:0004013(adenosylhomocysteinase activity);GO:0005829(cytosol);GO:0006730(one-carbon metabolic process);GO:0016787(hydrolase activity);GO:0019510(S-adenosylhomocysteine catabolic process);GO:0033353(S-adenosylmethionine cycle);GO:0051287(NAD binding)	00270(Cysteine and methionine metabolism)	K01251	EC:3.3.1.1
1	ENSDARG00000027744	gadd45ba	2.95521	2.36437	0.321803	0	0	growth arrest and DNA-damage-inducible, beta a [Source:ZFIN;Acc:ZDB-GENE-040426-1971]	GO:0000185(activation of MAPKKK activity);GO:0001756(somitogenesis);GO:0005634(nucleus);GO:0005737(cytoplasm);GO:0046686(response to cadmium ion);GO:0051597(response to methylmercury);GO:0051726(regulation of cell cycle)	04010(MAPK signaling pathway);04068(FoxO signaling pathway);04110(Cell cycle);04115(p53 signaling pathway);04210(Apoptosis);04218(Cellular senescence)	K04402	NA
1	ENSDARG00000006370	atp6v1h	1.03218	0.826047	0.321403	0	0	ATPase H+ transporting V1 subunit H [Source:ZFIN;Acc:ZDB-GENE-021219-2]	GO:0000221(vacuolar proton-transporting V-type ATPase, V1 domain);GO:0006811(ion transport);GO:0015991(ATP hydrolysis coupled proton transport);GO:0030282(bone mineralization);GO:0043473(pigmentation);GO:0046961(proton-transporting ATPase activity, rotational mechanism);GO:0048069(eye pigmentation);GO:0060041(retina development in camera-type eye);GO:0060348(bone development);GO:0061075(positive …	00190(Oxidative phosphorylation);04142(Lysosome);04145(Phagosome);04150(mTOR signaling pathway)	K02144	NA
1	ENSDARG00000011201	rplp2l	56.3076	45.1092	0.319908	0	0	ribosomal protein, large P2, like [Source:ZFIN;Acc:ZDB-GENE-070327-2]	GO:0003735(structural constituent of ribosome);GO:0005622(intracellular);GO:0005840(ribosome);GO:0006414(translational elongation);GO:0043009(chordate embryonic development)	03010(Ribosome)	K02943	NA
1	ENSDARG00000102617	timp4.2	0.569478	0.457083	0.317184	0	0	TIMP metallopeptidase inhibitor 4, tandem duplicate 2 [Source:ZFIN;Acc:ZDB-GENE-160114-61]	GO:0002020(protease binding);GO:0005515(protein binding);GO:0005576(extracellular region);GO:0005615(extracellular space);GO:0008191(metalloendopeptidase inhibitor activity);GO:0009725(response to hormone);GO:0010033(response to organic substance);GO:0010951(negative regulation of endopeptidase activity);GO:0031012(extracellular matrix);GO:0034097(response to cytokine);GO:0051045(negative regulat…	NA	NA	NA
1	ENSDARG00000068367	nfkbie	3.5714	2.86753	0.316683	0	0	nuclear factor of kappa light polypeptide gene enhancer in B-cells inhibitor, epsilon [Source:ZFIN;Acc:ZDB-GENE-061215-132]	GO:0003674(molecular_function);GO:0005515(protein binding);GO:0005575(cellular_component);GO:0008150(biological_process)	04920(Adipocytokine signaling pathway)	K05872	NA
1	ENSDARG00000005220	pdcd6	1.15063	0.924903	0.315045	0	0	programmed cell death 6 [Source:ZFIN;Acc:ZDB-GENE-040426-1307]	GO:0005509(calcium ion binding)	NA	NA	NA
1	ENSDARG00000005989	rgl1	0.478395	0.384733	0.314346	0	0	ral guanine nucleotide dissociation stimulator-like 1 [Source:ZFIN;Acc:ZDB-GENE-040426-1816]	GO:0005085(guanyl-nucleotide exchange factor activity);GO:0005622(intracellular);GO:0007165(signal transduction);GO:0007264(small GTPase mediated signal transduction);GO:0008321(Ral guanyl-nucleotide exchange factor activity)	NA	NA	NA
1	ENSDARG00000088030	rpl35a	38.1523	30.692	0.313906	0	0	ribosomal protein L35a [Source:ZFIN;Acc:ZDB-GENE-040718-190]	GO:0002181(cytoplasmic translation);GO:0003735(structural constituent of ribosome);GO:0005622(intracellular);GO:0005840(ribosome);GO:0006412(translation);GO:0022625(cytosolic large ribosomal subunit);GO:0030218(erythrocyte differentiation);GO:0042273(ribosomal large subunit biogenesis);GO:0043009(chordate embryonic development)	03010(Ribosome)	K02917	NA
1	ENSDARG00000032849	ndrg1a	0.9526	0.766568	0.313457	0	0	N-myc downstream regulated 1a [Source:ZFIN;Acc:ZDB-GENE-030826-34]	GO:0005737(cytoplasm);GO:0007165(signal transduction);GO:0032287(peripheral nervous system myelin maintenance);GO:0042127(regulation of cell population proliferation);GO:0045576(mast cell activation)	NA	K18266	NA
1	ENSDARG00000058105	rpl36a	47.8064	38.5245	0.311427	0	0	ribosomal protein L36A [Source:ZFIN;Acc:ZDB-GENE-020423-1]	GO:0003735(structural constituent of ribosome);GO:0005622(intracellular);GO:0005737(cytoplasm);GO:0005840(ribosome);GO:0006412(translation);GO:0022625(cytosolic large ribosomal subunit);GO:0043009(chordate embryonic development);GO:0051726(regulation of cell cycle)	03010(Ribosome)	K02929	NA
1	ENSDARG00000042824	nfe2l2a	2.5408	2.04879	0.31051	0	0	nuclear factor, erythroid 2-like 2a [Source:ZFIN;Acc:ZDB-GENE-030723-2]	GO:0000976(transcription regulatory region sequence-specific DNA binding);GO:0003677(DNA binding);GO:0003700(DNA-binding transcription factor activity);GO:0005634(nucleus);GO:0005667(transcription factor complex);GO:0005737(cytoplasm);GO:0006355(regulation of transcription, DNA-templated);GO:0006979(response to oxidative stress);GO:0034599(cellular response to oxidative stress);GO:0045893(positiv…	04141(Protein processing in endoplasmic reticulum)	K05638	NA
1	ENSDARG00000036316	rpl39	48.8541	39.496	0.306773	0	0	ribosomal protein L39 [Source:ZFIN;Acc:ZDB-GENE-040625-51]	GO:0003735(structural constituent of ribosome);GO:0005622(intracellular);GO:0005840(ribosome);GO:0006412(translation);GO:0022625(cytosolic large ribosomal subunit)	03010(Ribosome)	K02924	NA
1	ENSDARG00000099532	ubl3a	1.6007	1.29427	0.306569	0	0	ubiquitin-like 3a [Source:ZFIN;Acc:ZDB-GENE-030131-3431]	GO:0003674(molecular_function);GO:0005515(protein binding);GO:0005886(plasma membrane);GO:0016020(membrane)	NA	NA	NA
1	ENSDARG00000099555	foxo1a	2.21052	1.79404	0.301172	0	0	forkhead box O1 a [Source:ZFIN;Acc:ZDB-GENE-061013-59]	GO:0000122(negative regulation of transcription by RNA polymerase II);GO:0000981(DNA-binding transcription factor activity, RNA polymerase II-specific);GO:0001945(lymph vessel development);GO:0003677(DNA binding);GO:0003700(DNA-binding transcription factor activity);GO:0005634(nucleus);GO:0005737(cytoplasm);GO:0006355(regulation of transcription, DNA-templated);GO:0008134(transcription factor bin…	04068(FoxO signaling pathway);04218(Cellular senescence);04910(Insulin signaling pathway);04933(AGE-RAGE signaling pathway in diabetic complications)	K07201	NA
1	ENSDARG00000009387	robo4	0.366441	0.297444	0.300964	0	0	roundabout, axon guidance receptor, homolog 4 (Drosophila) [Source:ZFIN;Acc:ZDB-GENE-020809-1]	GO:0001525(angiogenesis);GO:0001954(positive regulation of cell-matrix adhesion);GO:0003674(molecular_function);GO:0005515(protein binding);GO:0005886(plasma membrane);GO:0007156(homophilic cell adhesion via plasma membrane adhesion molecules);GO:0007411(axon guidance);GO:0016021(integral component of membrane);GO:0030032(lamellipodium assembly);GO:0030334(regulation of cell migration);GO:0030424…	NA	K06784	NA
1	ENSDARG00000092807	si:dkey-151g10.6	104.573	84.9888	0.299164	0	0	si:dkey-151g10.6 [Source:ZFIN;Acc:ZDB-GENE-030131-7528]	GO:0003735(structural constituent of ribosome);GO:0005840(ribosome);GO:0006412(translation)	NA	NA	NA
1	ENSDARG00000067850	jund	2.21933	1.8079	0.295815	0	0	JunD proto-oncogene, AP-1 transcription factor subunit [Source:ZFIN;Acc:ZDB-GENE-070725-2]	GO:0000122(negative regulation of transcription by RNA polymerase II);GO:0000790(nuclear chromatin);GO:0000978(RNA polymerase II proximal promoter sequence-specific DNA binding);GO:0000981(DNA-binding transcription factor activity, RNA polymerase II-specific);GO:0003677(DNA binding);GO:0003700(DNA-binding transcription factor activity);GO:0003713(transcription coactivator activity);GO:0005634(nuc…	04010(MAPK signaling pathway)	K04449	NA
1	ENSDARG00000045367	tuba1b	0.58745	0.47881	0.295012	0	0	tubulin, alpha 1b [Source:ZFIN;Acc:ZDB-GENE-030822-1]	GO:0000166(nucleotide binding);GO:0000226(microtubule cytoskeleton organization);GO:0000278(mitotic cell cycle);GO:0003924(GTPase activity);GO:0005200(structural constituent of cytoskeleton);GO:0005525(GTP binding);GO:0005737(cytoplasm);GO:0005856(cytoskeleton);GO:0005874(microtubule);GO:0007017(microtubule-based process)	04145(Phagosome);04210(Apoptosis);04530(Tight junction);04540(Gap junction)	K07374	NA
1	ENSDARG00000012513	sdcbp2	8.8024	7.19618	0.290665	0	0	syndecan binding protein (syntenin) 2 [Source:ZFIN;Acc:ZDB-GENE-030131-3727]	GO:0001666(response to hypoxia);GO:0005515(protein binding);GO:0005737(cytoplasm);GO:0005886(plasma membrane);GO:0007268(chemical synaptic transmission);GO:0007416(synapse assembly);GO:0030036(actin cytoskeleton organization);GO:0035556(intracellular signal transduction);GO:0042246(tissue regeneration);GO:0043325(phosphatidylinositol-3,4-bisphosphate binding);GO:0045545(syndecan binding);GO:00551…	NA	K17254	NA
1	ENSDARG00000023394	slc37a2	0.410267	0.335504	0.290231	0	0	solute carrier family 37 (glucose-6-phosphate transporter), member 2 [Source:ZFIN;Acc:ZDB-GENE-040426-1949]	GO:0016020(membrane);GO:0016021(integral component of membrane);GO:0022857(transmembrane transporter activity);GO:0055085(transmembrane transport)	NA	K13783	NA
1	ENSDARG00000075021	fam120a	0.717413	0.588405	0.285994	0	0	family with sequence similarity 120A [Source:ZFIN;Acc:ZDB-GENE-110131-10]	GO:0003674(molecular_function);GO:0005634(nucleus);GO:0008150(biological_process)	NA	NA	NA
1	ENSDARG00000040474	snx10b	0.409387	0.336066	0.284722	0	0	sorting nexin 10b [Source:ZFIN;Acc:ZDB-GENE-070628-1]	GO:0005737(cytoplasm);GO:0005768(endosome);GO:0008289(lipid binding);GO:0010008(endosome membrane);GO:0015031(protein transport);GO:0016020(membrane);GO:0035091(phosphatidylinositol binding)	NA	K17924	NA
1	ENSDARG00000058160	tnfaip2b	0.350813	0.288128	0.283992	0	0	tumor necrosis factor, alpha-induced protein 2b [Source:ZFIN;Acc:ZDB-GENE-081107-56]	GO:0000145(exocyst);GO:0000149(SNARE binding);GO:0006887(exocytosis);GO:0051601(exocyst localization)	NA	K19989	NA
1	ENSDARG00000034291	rpl37.1	49.176	40.4261	0.282669	0	0	ribosomal protein L37 [Source:ZFIN;Acc:ZDB-GENE-040625-39]	GO:0003723(RNA binding);GO:0003735(structural constituent of ribosome);GO:0005622(intracellular);GO:0005840(ribosome);GO:0006412(translation);GO:0019843(rRNA binding);GO:0046872(metal ion binding)	03010(Ribosome)	K02922	NA
1	ENSDARG00000000767	spi1b	6.08505	5.00245	0.282636	0	0	Spi-1 proto-oncogene b [Source:ZFIN;Acc:ZDB-GENE-980526-164]	GO:0000981(DNA-binding transcription factor activity, RNA polymerase II-specific);GO:0003677(DNA binding);GO:0003700(DNA-binding transcription factor activity);GO:0005515(protein binding);GO:0005634(nucleus);GO:0006355(regulation of transcription, DNA-templated);GO:0006357(regulation of transcription by RNA polymerase II);GO:0010628(positive regulation of gene expression);GO:0030099(myeloid cell …	NA	K09438	NA
1	ENSDARG00000015623	ada2b	0.353541	0.290745	0.282124	0	0	adenosine deaminase 2b [Source:ZFIN;Acc:ZDB-GENE-041210-77]	GO:0004000(adenosine deaminase activity);GO:0005615(extracellular space);GO:0006154(adenosine catabolic process);GO:0008083(growth factor activity);GO:0010469(regulation of signaling receptor activity);GO:0019239(deaminase activity);GO:0030223(neutrophil differentiation);GO:0046103(inosine biosynthetic process);GO:0060837(blood vessel endothelial cell differentiation)	00230(Purine metabolism)	K19572	EC:3.5.4.4
1	ENSDARG00000075369	nck1b	1.33186	1.09619	0.280946	0	0	NCK adaptor protein 1b [Source:ZFIN;Acc:ZDB-GENE-090317-1]	GO:0005070(SH3/SH2 adaptor activity);GO:0005515(protein binding);GO:0005737(cytoplasm);GO:0005783(endoplasmic reticulum);GO:0006417(regulation of translation);GO:0009967(positive regulation of signal transduction)	04012(ErbB signaling pathway)	K07365	NA
1	ENSDARG00000058413	rnaset2l	0.496155	0.408607	0.280079	0	0	ribonuclease T2, like [Source:ZFIN;Acc:ZDB-GENE-090819-2]	GO:0003723(RNA binding);GO:0004521(endoribonuclease activity);GO:0005576(extracellular region);GO:0006401(RNA catabolic process);GO:0033897(ribonuclease T2 activity);GO:0090502(RNA phosphodiester bond hydrolysis, endonucleolytic)	NA	NA	NA
1	ENSDARG00000090890	cmklr1	0.592898	0.48863	0.279042	0	0	chemokine-like receptor 1 [Source:ZFIN;Acc:ZDB-GENE-060526-126]	GO:0004930(G protein-coupled receptor activity);GO:0006935(chemotaxis);GO:0006955(immune response);GO:0007165(signal transduction);GO:0007186(G protein-coupled receptor signaling pathway);GO:0007204(positive regulation of cytosolic calcium ion concentration);GO:0009897(external side of plasma membrane);GO:0016020(membrane);GO:0016021(integral component of membrane);GO:0016493(C-C chemokine recept…	NA	K04245	NA
1	ENSDARG00000059128	uqcrh	2.22212	1.8364	0.275057	0	0	ubiquinol-cytochrome c reductase hinge protein [Source:ZFIN;Acc:ZDB-GENE-051030-93]	GO:0005739(mitochondrion);GO:0005743(mitochondrial inner membrane);GO:0005750(mitochondrial respiratory chain complex III);GO:0006122(mitochondrial electron transport, ubiquinol to cytochrome c);GO:0008121(ubiquinol-cytochrome-c reductase activity);GO:0009060(aerobic respiration);GO:0016020(membrane);GO:0055114(oxidation-reduction process);GO:0070469(respirasome)	00190(Oxidative phosphorylation);04260(Cardiac muscle contraction)	K00416	NA
1	ENSDARG00000055854	nr4a3	2.81105	2.325	0.273876	0	0	nuclear receptor subfamily 4, group A, member 3 [Source:ZFIN;Acc:ZDB-GENE-070824-4]	GO:0000977(RNA polymerase II regulatory region sequence-specific DNA binding);GO:0000978(RNA polymerase II proximal promoter sequence-specific DNA binding);GO:0001780(neutrophil homeostasis);GO:0003677(DNA binding);GO:0003700(DNA-binding transcription factor activity);GO:0003707(steroid hormone receptor activity);GO:0004879(nuclear receptor activity);GO:0005634(nucleus);GO:0005667(transcription f…	NA	K08559	NA
1	ENSDARG00000037153	atp6ap1b	0.98909	0.818346	0.27339	0	0	ATPase H+ transporting accessory protein 1b [Source:ZFIN;Acc:ZDB-GENE-020423-2]	GO:0003140(determination of left/right asymmetry in lateral mesoderm);GO:0003406(retinal pigment epithelium development);GO:0005886(plasma membrane);GO:0008057(eye pigment granule organization);GO:0015991(ATP hydrolysis coupled proton transport);GO:0030641(regulation of cellular pH);GO:0032438(melanosome organization);GO:0033180(proton-transporting V-type ATPase, V1 domain);GO:0033181(plasma memb…	00190(Oxidative phosphorylation);04142(Lysosome);04145(Phagosome)	K03662	NA
1	ENSDARG00000043093	mpeg1.2	0.336602	0.278584	0.272934	0	0	macrophage expressed 1, tandem duplicate 2 [Source:ZFIN;Acc:ZDB-GENE-050522-305]	GO:0003674(molecular_function);GO:0016020(membrane);GO:0016021(integral component of membrane);GO:0042742(defense response to bacterium)	NA	NA	NA
1	ENSDARG00000056480	cpvl	0.471627	0.390469	0.272438	0	0	carboxypeptidase, vitellogenic-like [Source:ZFIN;Acc:ZDB-GENE-031219-2]	GO:0004180(carboxypeptidase activity);GO:0004185(serine-type carboxypeptidase activity);GO:0006508(proteolysis);GO:0051603(proteolysis involved in cellular protein catabolic process)	NA	K09645	EC:3.4.16.-
1	ENSDARG00000006413	rpl38	30.2945	25.0987	0.271444	0	0	ribosomal protein L38 [Source:ZFIN;Acc:ZDB-GENE-030131-8752]	GO:0003735(structural constituent of ribosome);GO:0005622(intracellular);GO:0005840(ribosome);GO:0006412(translation);GO:0022625(cytosolic large ribosomal subunit);GO:0043009(chordate embryonic development)	03010(Ribosome)	K02923	NA
1	ENSDARG00000113977	fthl29	0.351054	0.291184	0.269763	0	0	ferritin, heavy polypeptide-like 29 [Source:ZFIN;Acc:ZDB-GENE-080722-16]	GO:0004322(ferroxidase activity);GO:0005506(iron ion binding);GO:0005737(cytoplasm);GO:0006826(iron ion transport);GO:0006879(cellular iron ion homeostasis);GO:0006880(intracellular sequestering of iron ion);GO:0008198(ferrous iron binding);GO:0008199(ferric iron binding);GO:0042802(identical protein binding);GO:0046872(metal ion binding);GO:0055114(oxidation-reduction process)	NA	NA	NA
1	ENSDARG00000029036	rab32a	2.39154	1.98675	0.267529	0	0	RAB32a, member RAS oncogene family [Source:ZFIN;Acc:ZDB-GENE-031006-10]	GO:0003924(GTPase activity);GO:0005525(GTP binding);GO:0005739(mitochondrion);GO:0005794(Golgi apparatus);GO:0005802(trans-Golgi network);GO:0006886(intracellular protein transport);GO:0016192(vesicle-mediated transport);GO:0031982(vesicle);GO:0032482(Rab protein signal transduction);GO:0042470(melanosome);GO:0060036(notochord cell vacuolation)	NA	K07918	NA
1	ENSDARG00000075952	mbd2	1.27219	1.05738	0.266819	0	0	methyl-CpG binding domain protein 2 [Source:ZFIN;Acc:ZDB-GENE-030131-9049]	GO:0000122(negative regulation of transcription by RNA polymerase II);GO:0003677(DNA binding);GO:0005634(nucleus);GO:0006346(methylation-dependent chromatin silencing);GO:0008327(methyl-CpG binding)	NA	K11590	NA
1	ENSDARG00000074527	chst15	0.316245	0.262998	0.265992	0	0	carbohydrate (N-acetylgalactosamine 4-sulfate 6-O) sulfotransferase 15 [Source:ZFIN;Acc:ZDB-GENE-131127-327]	GO:0016020(membrane);GO:0016021(integral component of membrane)	00532(Glycosaminoglycan biosynthesis - chondroitin sulfate / dermatan sulfate)	K08106	EC:2.8.2.33
1	ENSDARG00000044902	atp2b4	1.18327	0.984339	0.265558	0	0	ATPase plasma membrane Ca2+ transporting 4 [Source:ZFIN;Acc:ZDB-GENE-061027-60]	GO:0000166(nucleotide binding);GO:0005388(calcium-transporting ATPase activity);GO:0005524(ATP binding);GO:0005887(integral component of plasma membrane);GO:0006811(ion transport);GO:0006816(calcium ion transport);GO:0006874(cellular calcium ion homeostasis);GO:0016020(membrane);GO:0016021(integral component of membrane);GO:0016787(hydrolase activity);GO:0030165(PDZ domain binding);GO:0051480(reg…	NA	NA	NA
1	ENSDARG00000044345	cyfip1	0.783641	0.654253	0.260345	0	0	cytoplasmic FMR1 interacting protein 1 [Source:ZFIN;Acc:ZDB-GENE-030131-8557]	GO:0005737(cytoplasm)	03013(RNA transport);04810(Regulation of actin cytoskeleton)	K05749	NA
1	ENSDARG00000044125	txn	4.61108	3.17205	0.539689	0	0	thioredoxin [Source:ZFIN;Acc:ZDB-GENE-040718-162]	GO:0005623(cell);GO:0006662(glycerol ether metabolic process);GO:0015035(protein disulfide oxidoreductase activity);GO:0045454(cell redox homeostasis);GO:0055114(oxidation-reduction process)	04621(NOD-like receptor signaling pathway)	K03671	NA
1	ENSDARG00000076820	xkr8.2	0.473049	0.367906	0.362652	0	0	XK, Kell blood group complex subunit-related family, member 8, tandem duplicate 2 [Source:ZFIN;Acc:ZDB-GENE-110106-2]	GO:0005886(plasma membrane);GO:0016020(membrane);GO:0016021(integral component of membrane);GO:0043652(engulfment of apoptotic cell);GO:0070782(phosphatidylserine exposure on apoptotic cell surface);GO:1902742(apoptotic process involved in development)	NA	NA	NA
1	ENSDARG00000009336	aif1l	1.05696	0.783532	0.431857	0	0	allograft inflammatory factor 1-like [Source:ZFIN;Acc:ZDB-GENE-030131-9646]	GO:0005509(calcium ion binding);GO:0005884(actin filament);GO:0032587(ruffle membrane);GO:0042995(cell projection);GO:0051015(actin filament binding);GO:0051017(actin filament bundle assembly);GO:0097178(ruffle assembly)	NA	K18617	NA
1	ENSDARG00000013961	slc31a1	0.542229	0.443823	0.288918	0	0	solute carrier family 31 (copper transporter), member 1 [Source:ZFIN;Acc:ZDB-GENE-040415-3]	GO:0005375(copper ion transmembrane transporter activity);GO:0005886(plasma membrane);GO:0006825(copper ion transport);GO:0006878(cellular copper ion homeostasis);GO:0016020(membrane);GO:0016021(integral component of membrane);GO:0035434(copper ion transmembrane transport);GO:0042539(hypotonic salinity response);GO:0046688(response to copper ion);GO:0071391(cellular response to estrogen stimulus)	NA	K14686	NA
1	ENSDARG00000009285	rpl15	52.9214	39.3183	0.428651	0	0	ribosomal protein L15 [Source:ZFIN;Acc:ZDB-GENE-040801-183]	GO:0002181(cytoplasmic translation);GO:0003723(RNA binding);GO:0003735(structural constituent of ribosome);GO:0005622(intracellular);GO:0005840(ribosome);GO:0006412(translation);GO:0022625(cytosolic large ribosomal subunit)	03010(Ribosome)	K02877	NA
1	ENSDARG00000095533	si:ch211-198c19.3	0.637184	0.489692	0.379835	0	0	si:ch211-198c19.3 [Source:ZFIN;Acc:ZDB-GENE-100922-226]	GO:0016020(membrane);GO:0016021(integral component of membrane)	NA	NA	NA
1	ENSDARG00000101675	zgc:123107	0.4823	0.392949	0.295588	0	0	zgc:123107 [Source:ZFIN;Acc:ZDB-GENE-051113-192]	GO:0003674(molecular_function);GO:0006955(immune response);GO:0016020(membrane);GO:0016021(integral component of membrane);GO:0019882(antigen processing and presentation);GO:0042613(MHC class II protein complex)	NA	NA	NA
1	ENSDARG00000020761	arrdc2	1.00515	0.729282	0.462862	0	1.35637e-307	arrestin domain containing 2 [Source:ZFIN;Acc:ZDB-GENE-030131-7146]	GO:0003674(molecular_function);GO:0005575(cellular_component)	NA	NA	NA
1	ENSDARG00000036875	rps12	54.2824	43.037	0.334907	0	1.11873e-305	ribosomal protein S12 [Source:ZFIN;Acc:ZDB-GENE-030131-8951]	GO:0003735(structural constituent of ribosome);GO:0005622(intracellular);GO:0005840(ribosome);GO:0006412(translation);GO:0022627(cytosolic small ribosomal subunit)	03010(Ribosome)	K02951	NA
1	ENSDARG00000026049	mxf	0.597821	0.463068	0.36849	0	8.21955e-305	myxovirus (influenza virus) resistance F [Source:ZFIN;Acc:ZDB-GENE-030721-9]	GO:0000166(nucleotide binding);GO:0000266(mitochondrial fission);GO:0003374(dynamin family protein polymerization involved in mitochondrial fission);GO:0003924(GTPase activity);GO:0005525(GTP binding);GO:0005737(cytoplasm);GO:0008017(microtubule binding);GO:0016020(membrane);GO:0031966(mitochondrial membrane);GO:0061025(membrane fusion)	NA	NA	NA
1	ENSDARG00000016745	slc35f6	0.565474	0.44457	0.347051	0	1.58628e-304	solute carrier family 35, member F6 [Source:ZFIN;Acc:ZDB-GENE-040718-297]	GO:0005739(mitochondrion);GO:0008284(positive regulation of cell population proliferation);GO:0016020(membrane);GO:0016021(integral component of membrane);GO:0022857(transmembrane transporter activity);GO:0055085(transmembrane transport);GO:1901029(negative regulation of mitochondrial outer membrane permeabilization involved in apoptotic signaling pathway)	NA	NA	NA
1	ENSDARG00000028957	maff	2.12646	1.72682	0.300329	0	1.74145e-304	v-maf avian musculoaponeurotic fibrosarcoma oncogene homolog F [Source:ZFIN;Acc:ZDB-GENE-040426-1280]	GO:0000978(RNA polymerase II proximal promoter sequence-specific DNA binding);GO:0003677(DNA binding);GO:0003700(DNA-binding transcription factor activity);GO:0005634(nucleus);GO:0005667(transcription factor complex);GO:0006355(regulation of transcription, DNA-templated);GO:0043565(sequence-specific DNA binding);GO:0045604(regulation of epidermal cell differentiation);GO:0045893(positive regulati…	NA	NA	NA
1	ENSDARG00000116524	zgc:103700	0.829941	0.612565	0.438145	4.74509e-308	1.31496e-303	zgc:103700 [Source:ZFIN;Acc:ZDB-GENE-041010-13]	GO:0006955(immune response);GO:0016020(membrane);GO:0019882(antigen processing and presentation);GO:0042613(MHC class II protein complex)	NA	NA	NA
1	ENSDARG00000018146	gpx1a	4.42352	3.33579	0.407169	2.02212e-306	5.6037e-302	glutathione peroxidase 1a [Source:ZFIN;Acc:ZDB-GENE-030410-1]	GO:0004601(peroxidase activity);GO:0004602(glutathione peroxidase activity);GO:0005739(mitochondrion);GO:0005829(cytosol);GO:0006749(glutathione metabolic process);GO:0006979(response to oxidative stress);GO:0010269(response to selenium ion);GO:0016491(oxidoreductase activity);GO:0042542(response to hydrogen peroxide);GO:0042744(hydrogen peroxide catabolic process);GO:0055114(oxidation-reduction …	00480(Glutathione metabolism);00590(Arachidonic acid metabolism)	K00432	EC:1.11.1.9
1	ENSDARG00000041182	rpl4	20.5887	15.7116	0.390024	3.75806e-306	1.04143e-301	ribosomal protein L4 [Source:ZFIN;Acc:ZDB-GENE-030131-9034]	GO:0003735(structural constituent of ribosome);GO:0005840(ribosome);GO:0006412(translation);GO:0022625(cytosolic large ribosomal subunit)	03010(Ribosome)	K02930	NA
1	ENSDARG00000036456	anxa4	3.49225	2.8578	0.289252	1.69619e-305	4.70048e-301	annexin A4 [Source:ZFIN;Acc:ZDB-GENE-030707-1]	GO:0005509(calcium ion binding);GO:0005544(calcium-dependent phospholipid binding)	NA	K17093	NA
1	ENSDARG00000068382	pglyrp5	7.73953	4.703	0.718663	6.84617e-304	1.89721e-299	peptidoglycan recognition protein 5 [Source:ZFIN;Acc:ZDB-GENE-050419-71]	GO:0002221(pattern recognition receptor signaling pathway);GO:0005615(extracellular space);GO:0008270(zinc ion binding);GO:0008745(N-acetylmuramoyl-L-alanine amidase activity);GO:0009253(peptidoglycan catabolic process);GO:0016019(peptidoglycan receptor activity);GO:0016045(detection of bacterium);GO:0019730(antimicrobial humoral response);GO:0031640(killing of cells of other organism);GO:0032689…	NA	K01446	NA
1	ENSDARG00000006316	rpl23a	37.5369	28.7241	0.386049	1.31454e-303	3.64284e-299	ribosomal protein L23a [Source:ZFIN;Acc:ZDB-GENE-030131-7479]	GO:0000027(ribosomal large subunit assembly);GO:0003735(structural constituent of ribosome);GO:0005622(intracellular);GO:0005840(ribosome);GO:0006412(translation);GO:0022625(cytosolic large ribosomal subunit);GO:0031016(pancreas development);GO:0051726(regulation of cell cycle)	03010(Ribosome)	K02893	NA
1	ENSDARG00000033355	zgc:101699	0.376381	0.302643	0.314579	8.06499e-302	2.23497e-297	zgc:101699 [Source:ZFIN;Acc:ZDB-GENE-041114-140]	GO:0004620(phospholipase activity);GO:0004623(phospholipase A2 activity);GO:0005509(calcium ion binding);GO:0005544(calcium-dependent phospholipid binding);GO:0005575(cellular_component);GO:0005635(nuclear envelope);GO:0005654(nucleoplasm);GO:0005737(cytoplasm);GO:0006629(lipid metabolic process);GO:0009395(phospholipid catabolic process);GO:0016042(lipid catabolic process);GO:0016787(hydrolase a…	NA	NA	NA
1	ENSDARG00000090912	npc2	2.31889	1.78003	0.38153	1.72265e-300	4.77382e-296	Niemann-Pick disease, type C2 [Source:ZFIN;Acc:ZDB-GENE-021206-13]	GO:0005576(extracellular region);GO:0005764(lysosome);GO:0005783(endoplasmic reticulum);GO:0006629(lipid metabolic process);GO:0006869(lipid transport);GO:0008202(steroid metabolic process);GO:0008203(cholesterol metabolic process);GO:0032367(intracellular cholesterol transport)	04142(Lysosome)	K13443	NA
1	ENSDARG00000089667	MFAP4 (1 of many).1	0.302991	0.252837	0.261068	4.36667e-298	1.21009e-293	zgc:173915 [Source:ZFIN;Acc:ZDB-GENE-071004-112]	GO:0005575(cellular_component)	NA	NA	NA
1	ENSDARG00000053457	rpl23	63.9729	51.9833	0.299414	3.91175e-293	1.08402e-288	ribosomal protein L23 [Source:ZFIN;Acc:ZDB-GENE-030131-8756]	GO:0003735(structural constituent of ribosome);GO:0005840(ribosome);GO:0006412(translation);GO:0022625(cytosolic large ribosomal subunit);GO:0070180(large ribosomal subunit rRNA binding)	03010(Ribosome)	K02894	NA
1	ENSDARG00000015862	rpl5b	16.2701	12.494	0.380987	2.90382e-292	8.04707e-288	ribosomal protein L5b [Source:ZFIN;Acc:ZDB-GENE-040625-93]	GO:0000027(ribosomal large subunit assembly);GO:0003735(structural constituent of ribosome);GO:0005622(intracellular);GO:0005840(ribosome);GO:0006412(translation);GO:0008097(5S rRNA binding);GO:0022625(cytosolic large ribosomal subunit)	03010(Ribosome)	K02932	NA
1	ENSDARG00000101082	eif3s6ip	2.09377	1.70152	0.299283	1.87388e-291	5.19289e-287	eukaryotic translation initiation factor 3, subunit 6 interacting protein [Source:ZFIN;Acc:ZDB-GENE-040426-2138]	GO:0001732(formation of cytoplasmic translation initiation complex);GO:0002183(cytoplasmic translational initiation);GO:0003743(translation initiation factor activity);GO:0005515(protein binding);GO:0005737(cytoplasm);GO:0005852(eukaryotic translation initiation factor 3 complex);GO:0006412(translation);GO:0006413(translational initiation);GO:0016282(eukaryotic 43S preinitiation complex);GO:00332…	NA	K15029	NA
1	ENSDARG00000011405	rps9	60.4159	45.9425	0.395098	2.62056e-291	7.26211e-287	ribosomal protein S9 [Source:ZFIN;Acc:ZDB-GENE-010724-15]	GO:0003723(RNA binding);GO:0003735(structural constituent of ribosome);GO:0005622(intracellular);GO:0005840(ribosome);GO:0006412(translation);GO:0015935(small ribosomal subunit);GO:0019843(rRNA binding);GO:0022627(cytosolic small ribosomal subunit);GO:0045903(positive regulation of translational fidelity)	03010(Ribosome)	K02997	NA
1	ENSDARG00000054616	cldni	0.989566	0.699459	0.500556	7.33665e-290	2.03313e-285	claudin i [Source:ZFIN;Acc:ZDB-GENE-010328-9]	GO:0005198(structural molecule activity);GO:0005886(plasma membrane);GO:0005923(bicellular tight junction);GO:0016020(membrane);GO:0016021(integral component of membrane);GO:0030054(cell junction)	NA	NA	NA
1	ENSDARG00000100588	rpl36	31.0504	25.562	0.280613	1.50402e-289	4.16793e-285	ribosomal protein L36 [Source:ZFIN;Acc:ZDB-GENE-040622-2]	GO:0002181(cytoplasmic translation);GO:0003735(structural constituent of ribosome);GO:0005622(intracellular);GO:0005737(cytoplasm);GO:0005829(cytosol);GO:0005840(ribosome);GO:0006412(translation);GO:0007420(brain development);GO:0022625(cytosolic large ribosomal subunit);GO:0051726(regulation of cell cycle)	03010(Ribosome)	K02920	NA
1	ENSDARG00000102105	dad1	2.69628	2.14054	0.333	5.05076e-289	1.39967e-284	defender against cell death 1 [Source:ZFIN;Acc:ZDB-GENE-060503-233]	GO:0004576(oligosaccharyl transferase activity);GO:0004579(dolichyl-diphosphooligosaccharide-protein glycotransferase activity);GO:0005783(endoplasmic reticulum);GO:0005789(endoplasmic reticulum membrane);GO:0006486(protein glycosylation);GO:0006487(protein N-linked glycosylation);GO:0008250(oligosaccharyltransferase complex);GO:0016020(membrane);GO:0016021(integral component of membrane)	00510(N-Glycan biosynthesis);04141(Protein processing in endoplasmic reticulum)	K12668	NA
1	ENSDARG00000007836	ctsla	2.77772	1.83204	0.600448	1.33234e-288	3.69218e-284	cathepsin La [Source:ZFIN;Acc:ZDB-GENE-030131-106]	GO:0004197(cysteine-type endopeptidase activity);GO:0005615(extracellular space);GO:0005764(lysosome);GO:0006508(proteolysis);GO:0008233(peptidase activity);GO:0008234(cysteine-type peptidase activity);GO:0016787(hydrolase activity);GO:0051603(proteolysis involved in cellular protein catabolic process)	04140(Autophagy - animal);04142(Lysosome);04145(Phagosome);04210(Apoptosis)	K01365	EC:3.4.22.15
1	ENSDARG00000039347	rps24	52.6179	41.9733	0.326081	6.11744e-288	1.69527e-283	ribosomal protein S24 [Source:ZFIN;Acc:ZDB-GENE-040109-5]	GO:0003735(structural constituent of ribosome);GO:0005622(intracellular);GO:0005840(ribosome);GO:0006412(translation);GO:0060215(primitive hemopoiesis);GO:0060216(definitive hemopoiesis)	03010(Ribosome)	K02974	NA
1	ENSDARG00000052178	eif2s1b	2.42059	1.99791	0.276867	1.07008e-282	2.96541e-278	eukaryotic translation initiation factor 2, subunit 1 alpha b [Source:ZFIN;Acc:ZDB-GENE-030131-283]	GO:0003676(nucleic acid binding);GO:0003723(RNA binding);GO:0003743(translation initiation factor activity);GO:0005737(cytoplasm);GO:0005850(eukaryotic translation initiation factor 2 complex);GO:0005851(eukaryotic translation initiation factor 2B complex);GO:0006413(translational initiation);GO:0033290(eukaryotic 48S preinitiation complex);GO:0043022(ribosome binding);GO:0043614(multi-eIF comple…	03013(RNA transport);04140(Autophagy - animal);04141(Protein processing in endoplasmic reticulum);04210(Apoptosis);05168(Herpes simplex virus 1 infection)	K03237	NA
1	ENSDARG00000052712	suclg1	2.67804	2.04529	0.388873	4.39815e-279	1.21882e-274	succinate-CoA ligase, alpha subunit [Source:ZFIN;Acc:ZDB-GENE-040912-101]	GO:0000166(nucleotide binding);GO:0003824(catalytic activity);GO:0004550(nucleoside diphosphate kinase activity);GO:0004775(succinate-CoA ligase (ADP-forming) activity);GO:0004776(succinate-CoA ligase (GDP-forming) activity);GO:0005739(mitochondrion);GO:0005829(cytosol);GO:0006099(tricarboxylic acid cycle);GO:0006104(succinyl-CoA metabolic process);GO:0006105(succinate metabolic process);GO:00061…	00020(Citrate cycle (TCA cycle));00640(Propanoate metabolism)	K01899	6.2.1.5;EC:6.2.1.4
1	ENSDARG00000018529	lipf	0.543513	0.430228	0.337216	5.73904e-276	1.5904e-271	lipase, gastric [Source:ZFIN;Acc:ZDB-GENE-040426-2737]	GO:0001666(response to hypoxia);GO:0005575(cellular_component);GO:0016042(lipid catabolic process);GO:0016298(lipase activity);GO:0016787(hydrolase activity);GO:0016788(hydrolase activity, acting on ester bonds);GO:0044255(cellular lipid metabolic process)	00100(Steroid biosynthesis);04142(Lysosome)	K01052	EC:3.1.1.13
1	ENSDARG00000103994	ppiab	16.7137	13.057	0.356209	2.39156e-275	6.62749e-271	peptidylprolyl isomerase Ab (cyclophilin A) [Source:ZFIN;Acc:ZDB-GENE-030131-7459]	GO:0000413(protein peptidyl-prolyl isomerization);GO:0001666(response to hypoxia);GO:0003755(peptidyl-prolyl cis-trans isomerase activity);GO:0005575(cellular_component);GO:0006457(protein folding);GO:0016018(cyclosporin A binding);GO:0016853(isomerase activity);GO:0042026(protein refolding);GO:0051082(unfolded protein binding)	04217(Necroptosis)	K03767	EC:5.2.1.8
1	ENSDARG00000041811	rps25	43.7395	36.376	0.265948	5.61667e-274	1.55649e-269	ribosomal protein S25 [Source:ZFIN;Acc:ZDB-GENE-040426-1788]	GO:0005840(ribosome)	03010(Ribosome)	K02975	NA
1	ENSDARG00000003216	anxa2a	2.49313	2.02231	0.30195	5.27845e-272	1.46276e-267	annexin A2a [Source:ZFIN;Acc:ZDB-GENE-030131-4282]	GO:0004859(phospholipase inhibitor activity);GO:0005509(calcium ion binding);GO:0005544(calcium-dependent phospholipid binding);GO:0008092(cytoskeletal protein binding);GO:0043086(negative regulation of catalytic activity)	NA	K17092	NA
1	ENSDARG00000078785	tmem258	2.14707	1.79015	0.262285	4.77205e-271	1.32243e-266	transmembrane protein 258 [Source:ZFIN;Acc:ZDB-GENE-040426-1739]	GO:0003674(molecular_function);GO:0005783(endoplasmic reticulum);GO:0006486(protein glycosylation);GO:0006487(protein N-linked glycosylation);GO:0016020(membrane);GO:0016021(integral component of membrane);GO:0034998(oligosaccharyltransferase I complex)	NA	NA	NA
1	ENSDARG00000045190	ch25h	1.02001	0.816476	0.3211	2.59959e-270	7.20397e-266	cholesterol 25-hydroxylase [Source:ZFIN;Acc:ZDB-GENE-041212-81]	GO:0000254(C-4 methylsterol oxidase activity);GO:0001567(cholesterol 25-hydroxylase activity);GO:0004497(monooxygenase activity);GO:0005506(iron ion binding);GO:0005783(endoplasmic reticulum);GO:0005789(endoplasmic reticulum membrane);GO:0006629(lipid metabolic process);GO:0006694(steroid biosynthetic process);GO:0008202(steroid metabolic process);GO:0008203(cholesterol metabolic process);GO:0008…	00120(Primary bile acid biosynthesis)	K10223	EC:1.14.99.38
1	ENSDARG00000020850	eef1a1l2	86.7907	69.7441	0.315469	7.44272e-270	2.06253e-265	eukaryotic translation elongation factor 1 alpha 1, like 2 [Source:ZFIN;Acc:ZDB-GENE-050706-188]	GO:0000166(nucleotide binding);GO:0003746(translation elongation factor activity);GO:0003924(GTPase activity);GO:0005525(GTP binding);GO:0005737(cytoplasm);GO:0006412(translation);GO:0006414(translational elongation)	03013(RNA transport)	K03231	NA
1	ENSDARG00000004757	ybx1	18.8474	15.096	0.320199	1.85117e-268	5.12998e-264	Y box binding protein 1 [Source:ZFIN;Acc:ZDB-GENE-000629-3]	GO:0003676(nucleic acid binding);GO:0003723(RNA binding);GO:0005634(nucleus);GO:0008190(eukaryotic initiation factor 4E binding);GO:0045947(negative regulation of translational initiation);GO:0048025(negative regulation of mRNA splicing, via spliceosome);GO:0050686(negative regulation of mRNA processing);GO:0051236(establishment of RNA localization);GO:1900364(negative regulation of mRNA polyaden…	NA	K09276	NA
1	ENSDARG00000090194	lamtor5	0.774502	0.637958	0.279809	2.76308e-266	7.65705e-262	late endosomal/lysosomal adaptor, MAPK and MTOR activator 5 [Source:ZFIN;Acc:ZDB-GENE-110411-193]	GO:0005737(cytoplasm);GO:0019079(viral genome replication);GO:0043066(negative regulation of apoptotic process);GO:0043154(negative regulation of cysteine-type endopeptidase activity involved in apoptotic process);GO:0071986(Ragulator complex)	04150(mTOR signaling pathway)	K16344	NA
1	ENSDARG00000063626	ddx21	2.98396	2.46591	0.27511	4.19347e-265	1.16209e-260	DEAD (Asp-Glu-Ala-Asp) box helicase 21 [Source:ZFIN;Acc:ZDB-GENE-031113-10]	GO:0003676(nucleic acid binding);GO:0003723(RNA binding);GO:0004386(helicase activity);GO:0005524(ATP binding);GO:0005634(nucleus)	NA	K16911	EC:3.6.4.13
1	ENSDARG00000014690	rps4x	49.9777	37.9966	0.395414	2.50863e-263	6.95191e-259	ribosomal protein S4 X-linked [Source:ZFIN;Acc:ZDB-GENE-040927-19]	GO:0003723(RNA binding);GO:0003735(structural constituent of ribosome);GO:0005622(intracellular);GO:0005840(ribosome);GO:0006412(translation);GO:0007420(brain development);GO:0019843(rRNA binding);GO:0022627(cytosolic small ribosomal subunit);GO:0043009(chordate embryonic development)	03010(Ribosome)	K02987	NA
1	ENSDARG00000090444	ponzr1	4.75496	3.79852	0.323998	3.33906e-263	9.25321e-259	plac8 onzin related protein 1 [Source:ZFIN;Acc:ZDB-GENE-070727-1]	GO:0016020(membrane);GO:0016021(integral component of membrane);GO:0035775(pronephric glomerulus morphogenesis);GO:0048703(embryonic viscerocranium morphogenesis);GO:0072078(nephron tubule morphogenesis)	NA	NA	NA
1	ENSDARG00000020197	rpl5a	20.7196	15.6835	0.40175	5.47541e-263	1.51735e-258	ribosomal protein L5a [Source:ZFIN;Acc:ZDB-GENE-030131-5161]	GO:0000027(ribosomal large subunit assembly);GO:0003735(structural constituent of ribosome);GO:0005622(intracellular);GO:0005840(ribosome);GO:0006412(translation);GO:0008097(5S rRNA binding);GO:0022625(cytosolic large ribosomal subunit);GO:0043009(chordate embryonic development)	03010(Ribosome)	K02932	NA
1	ENSDARG00000057556	rpl17	61.6275	47.2814	0.382301	5.65286e-259	1.56652e-254	ribosomal protein L17 [Source:ZFIN;Acc:ZDB-GENE-030131-8585]	GO:0002181(cytoplasmic translation);GO:0003735(structural constituent of ribosome);GO:0005622(intracellular);GO:0005840(ribosome);GO:0006412(translation);GO:0015934(large ribosomal subunit);GO:0022625(cytosolic large ribosomal subunit)	03010(Ribosome)	K02880	NA
1	ENSDARG00000037350	rpl9.1	46.1592	35.455	0.380627	1.66985e-258	4.6275e-254	ribosomal protein L9 [Source:ZFIN;Acc:ZDB-GENE-030131-8646]	GO:0002181(cytoplasmic translation);GO:0003735(structural constituent of ribosome);GO:0005622(intracellular);GO:0005840(ribosome);GO:0006412(translation);GO:0019843(rRNA binding);GO:0022625(cytosolic large ribosomal subunit)	03010(Ribosome)	K02940	NA
1	ENSDARG00000103007	rps3	34.9119	26.9227	0.374896	6.0361e-258	1.67272e-253	ribosomal protein S3 [Source:ZFIN;Acc:ZDB-GENE-030131-8494]	GO:0003684(damaged DNA binding);GO:0003723(RNA binding);GO:0003735(structural constituent of ribosome);GO:0003906(DNA-(apurinic or apyrimidinic site) endonuclease activity);GO:0005634(nucleus);GO:0005840(ribosome);GO:0006281(DNA repair);GO:0006412(translation);GO:0008534(oxidized purine nucleobase lesion DNA N-glycosylase activity);GO:0015935(small ribosomal subunit);GO:0022627(cytosolic small ri…	03010(Ribosome)	K02985	NA
1	ENSDARG00000035692	rps3a	60.5731	46.4414	0.383265	7.83156e-258	2.17028e-253	ribosomal protein S3A [Source:ZFIN;Acc:ZDB-GENE-030131-9184]	GO:0003735(structural constituent of ribosome);GO:0005622(intracellular);GO:0005737(cytoplasm);GO:0005829(cytosol);GO:0005840(ribosome);GO:0006412(translation);GO:0022627(cytosolic small ribosomal subunit);GO:0043009(chordate embryonic development)	03010(Ribosome)	K02984	NA
1	ENSDARG00000045487	rps16	38.5539	30.0628	0.358898	3.64857e-254	1.01109e-249	ribosomal protein S16 [Source:ZFIN;Acc:ZDB-GENE-050506-107]	GO:0000462(maturation of SSU-rRNA from tricistronic rRNA transcript (SSU-rRNA, 5.8S rRNA, LSU-rRNA));GO:0003723(RNA binding);GO:0003735(structural constituent of ribosome);GO:0005840(ribosome);GO:0006412(translation);GO:0022627(cytosolic small ribosomal subunit)	03010(Ribosome)	K02960	NA
1	ENSDARG00000019230	rpl7a	62.2581	47.0223	0.404917	1.58632e-253	4.39602e-249	ribosomal protein L7a [Source:ZFIN;Acc:ZDB-GENE-031001-9]	GO:0000470(maturation of LSU-rRNA);GO:0003723(RNA binding);GO:0005840(ribosome);GO:0022625(cytosolic large ribosomal subunit);GO:0042254(ribosome biogenesis);GO:1990904(ribonucleoprotein complex)	03010(Ribosome)	K02936	NA
1	ENSDARG00000074287	sptlc2b	3.20619	2.58775	0.309161	3.30507e-249	9.15901e-245	serine palmitoyltransferase, long chain base subunit 2b [Source:ZFIN;Acc:ZDB-GENE-080305-8]	GO:0003824(catalytic activity);GO:0009058(biosynthetic process);GO:0016020(membrane);GO:0016021(integral component of membrane);GO:0016740(transferase activity);GO:0030170(pyridoxal phosphate binding)	00600(Sphingolipid metabolism)	K00654	EC:2.3.1.50
1	ENSDARG00000019778	rps6	38.1477	29.4559	0.373039	5.12633e-248	1.42061e-243	ribosomal protein S6 [Source:ZFIN;Acc:ZDB-GENE-040801-8]	GO:0003735(structural constituent of ribosome);GO:0005622(intracellular);GO:0005840(ribosome);GO:0006412(translation)	03010(Ribosome);04150(mTOR signaling pathway);04371(Apelin signaling pathway);04910(Insulin signaling pathway)	K02991	NA
1	ENSDARG00000102175	hamp	0.566183	0.417651	0.438972	2.34983e-247	6.51184e-243	hepcidin antimicrobial peptide [Source:ZFIN;Acc:ZDB-GENE-050726-1]	GO:0001530(lipopolysaccharide binding);GO:0005179(hormone activity);GO:0005576(extracellular region);GO:0005623(cell);GO:0006879(cellular iron ion homeostasis);GO:0009617(response to bacterium);GO:0010469(regulation of signaling receptor activity);GO:0042742(defense response to bacterium);GO:0042834(peptidoglycan binding);GO:0050829(defense response to Gram-negative bacterium);GO:0050830(defense …	04350(TGF-beta signaling pathway)	K23106	NA
1	ENSDARG00000034897	rps10	53.9787	43.575	0.308891	3.23988e-246	8.97835e-242	ribosomal protein S10 [Source:ZFIN;Acc:ZDB-GENE-040426-1481]	GO:0000028(ribosomal small subunit assembly);GO:0003735(structural constituent of ribosome);GO:0005840(ribosome);GO:0022627(cytosolic small ribosomal subunit)	03010(Ribosome)	K02947	NA
1	ENSDARG00000043509	rpl11	55.5732	44.342	0.325716	4.6365e-245	1.28487e-240	ribosomal protein L11 [Source:ZFIN;Acc:ZDB-GENE-040625-147]	GO:0000027(ribosomal large subunit assembly);GO:0003735(structural constituent of ribosome);GO:0005622(intracellular);GO:0005840(ribosome);GO:0006412(translation);GO:0006915(apoptotic process);GO:0022625(cytosolic large ribosomal subunit);GO:0030097(hemopoiesis);GO:0030218(erythrocyte differentiation);GO:0042541(hemoglobin biosynthetic process);GO:0042593(glucose homeostasis);GO:0043009(chordate …	03010(Ribosome)	K02868	NA
1	ENSDARG00000044562	cycsb	6.27793	4.75253	0.401592	2.40936e-244	6.67682e-240	cytochrome c, somatic b [Source:ZFIN;Acc:ZDB-GENE-040625-38]	GO:0005739(mitochondrion);GO:0005758(mitochondrial intermembrane space);GO:0006122(mitochondrial electron transport, ubiquinol to cytochrome c);GO:0006123(mitochondrial electron transport, cytochrome c to oxygen);GO:0009055(electron transfer activity);GO:0020037(heme binding);GO:0046872(metal ion binding);GO:0055114(oxidation-reduction process);GO:0070469(respirasome)	04115(p53 signaling pathway);04210(Apoptosis);05168(Herpes simplex virus 1 infection)	K08738	NA
1	ENSDARG00000041619	rack1	41.0512	32.1477	0.352712	1.17508e-243	3.25638e-239	receptor for activated C kinase 1 [Source:ZFIN;Acc:ZDB-GENE-990415-89]	GO:0001525(angiogenesis);GO:0001934(positive regulation of protein phosphorylation);GO:0005080(protein kinase C binding);GO:0005515(protein binding);GO:0005634(nucleus);GO:0005737(cytoplasm);GO:0005829(cytosol);GO:0005840(ribosome);GO:0019899(enzyme binding);GO:0022627(cytosolic small ribosomal subunit);GO:0030178(negative regulation of Wnt signaling pathway);GO:0032880(regulation of protein loca…	NA	K14753	NA
1	ENSDARG00000015128	rpl27	39.9903	32.1733	0.313787	3.02785e-240	8.39079e-236	ribosomal protein L27 [Source:ZFIN;Acc:ZDB-GENE-030131-4343]	GO:0003735(structural constituent of ribosome);GO:0005622(intracellular);GO:0005737(cytoplasm);GO:0005783(endoplasmic reticulum);GO:0005791(rough endoplasmic reticulum);GO:0005829(cytosol);GO:0005840(ribosome);GO:0006412(translation);GO:0015934(large ribosomal subunit);GO:0022625(cytosolic large ribosomal subunit);GO:0030218(erythrocyte differentiation);GO:0098556(cytoplasmic side of rough endopl…	03010(Ribosome)	K02901	NA
1	ENSDARG00000101844	mibp2	11.5487	8.7624	0.398331	1.25329e-239	3.47313e-235	muscle-specific beta 1 integrin binding protein 2 [Source:ZFIN;Acc:ZDB-GENE-031113-14]	GO:0007045(cell-substrate adherens junction assembly);GO:0007229(integrin-mediated signaling pathway);GO:0007517(muscle organ development);GO:0016301(kinase activity);GO:0016310(phosphorylation);GO:0070831(basement membrane assembly)	00760(Nicotinate and nicotinamide metabolism)	K10524	2.7.1.173;EC:2.7.1.22
1	ENSDARG00000036044	rps20	75.5963	60.3824	0.324187	5.07326e-237	1.4059e-232	ribosomal protein S20 [Source:ZFIN;Acc:ZDB-GENE-040426-2284]	NA	03010(Ribosome)	K02969	NA
1	ENSDARG00000015978	COX5B	5.51487	4.28481	0.364097	7.78407e-237	2.15712e-232	zgc:86599 [Source:ZFIN;Acc:ZDB-GENE-040625-180]	GO:0004129(cytochrome-c oxidase activity);GO:0005740(mitochondrial envelope);GO:0006123(mitochondrial electron transport, cytochrome c to oxygen);GO:0042776(mitochondrial ATP synthesis coupled proton transport)	00190(Oxidative phosphorylation);04260(Cardiac muscle contraction)	K02265	NA
1	ENSDARG00000029072	klf6a	3.55221	2.71663	0.386901	3.72196e-234	1.03143e-229	Kruppel-like factor 6a [Source:ZFIN;Acc:ZDB-GENE-021115-9]	GO:0000122(negative regulation of transcription by RNA polymerase II);GO:0000785(chromatin);GO:0000981(DNA-binding transcription factor activity, RNA polymerase II-specific);GO:0001158(enhancer sequence-specific DNA binding);GO:0001227(DNA-binding transcription repressor activity, RNA polymerase II-specific);GO:0001889(liver development);GO:0003676(nucleic acid binding);GO:0003682(chromatin bindi…	NA	K09207	NA
1	ENSDARG00000099380	rpl13	68.7357	54.4393	0.336412	4.36181e-234	1.20874e-229	ribosomal protein L13 [Source:ZFIN;Acc:ZDB-GENE-031007-1]	GO:0003735(structural constituent of ribosome);GO:0005622(intracellular);GO:0005840(ribosome);GO:0006412(translation);GO:0022625(cytosolic large ribosomal subunit);GO:0051726(regulation of cell cycle)	03010(Ribosome)	K02873	NA
1	ENSDARG00000040076	pycard	1.05761	0.865444	0.289294	4.7858e-232	1.32624e-227	PYD and CARD domain containing [Source:ZFIN;Acc:ZDB-GENE-000511-2]	GO:0004197(cysteine-type endopeptidase activity);GO:0006508(proteolysis);GO:0006954(inflammatory response);GO:0042981(regulation of apoptotic process);GO:0045087(innate immune response)	04217(Necroptosis);04621(NOD-like receptor signaling pathway);04623(Cytosolic DNA-sensing pathway);04625(C-type lectin receptor signaling pathway);05132(Salmonella infection)	K12799	NA
1	ENSDARG00000009447	atp5mc3b	10.1611	7.96812	0.350743	2.78644e-228	7.72177e-224	ATP synthase membrane subunit c locus 3b [Source:ZFIN;Acc:ZDB-GENE-020814-1]	GO:0000276(mitochondrial proton-transporting ATP synthase complex, coupling factor F(o));GO:0006811(ion transport);GO:0008289(lipid binding);GO:0015078(proton transmembrane transporter activity);GO:0015986(ATP synthesis coupled proton transport);GO:0015991(ATP hydrolysis coupled proton transport);GO:0016020(membrane);GO:0016021(integral component of membrane);GO:0033177(proton-transporting two-se…	00190(Oxidative phosphorylation)	K02128	NA
1	ENSDARG00000044521	eef1b2	23.4106	17.9834	0.380493	2.90645e-228	8.05436e-224	eukaryotic translation elongation factor 1 beta 2 [Source:ZFIN;Acc:ZDB-GENE-030131-7310]	GO:0003676(nucleic acid binding);GO:0003746(translation elongation factor activity);GO:0005853(eukaryotic translation elongation factor 1 complex);GO:0006412(translation);GO:0006414(translational elongation);GO:0008270(zinc ion binding)	NA	K03232	NA
1	ENSDARG00000036629	rps14	61.252	49.3192	0.312607	5.04891e-227	1.39915e-222	ribosomal protein S14 [Source:ZFIN;Acc:ZDB-GENE-030131-8631]	GO:0000028(ribosomal small subunit assembly);GO:0000462(maturation of SSU-rRNA from tricistronic rRNA transcript (SSU-rRNA, 5.8S rRNA, LSU-rRNA));GO:0003735(structural constituent of ribosome);GO:0005840(ribosome);GO:0006412(translation);GO:0022627(cytosolic small ribosomal subunit);GO:0043009(chordate embryonic development);GO:0043249(erythrocyte maturation);GO:0048027(mRNA 5'-UTR binding);GO:00…	03010(Ribosome)	K02955	NA
1	ENSDARG00000032725	rps27a	61.7123	50.6199	0.285855	4.93523e-226	1.36765e-221	ribosomal protein S27a [Source:ZFIN;Acc:ZDB-GENE-030131-10018]	GO:0003735(structural constituent of ribosome);GO:0005515(protein binding);GO:0005634(nucleus);GO:0005737(cytoplasm);GO:0005840(ribosome);GO:0006412(translation);GO:0016567(protein ubiquitination);GO:0019941(modification-dependent protein catabolic process);GO:0022627(cytosolic small ribosomal subunit);GO:0031386(protein tag);GO:0031625(ubiquitin protein ligase binding)	03010(Ribosome)	K02977	NA
1	ENSDARG00000054818	rpl32	54.3402	44.581	0.285591	3.90553e-224	1.0823e-219	ribosomal protein L32 [Source:ZFIN;Acc:ZDB-GENE-060331-105]	GO:0003735(structural constituent of ribosome);GO:0005622(intracellular);GO:0005840(ribosome);GO:0006412(translation);GO:0022625(cytosolic large ribosomal subunit)	03010(Ribosome)	K02912	NA
1	ENSDARG00000055996	rps8a	62.9621	48.9382	0.363522	7.60342e-224	2.10706e-219	ribosomal protein S8a [Source:ZFIN;Acc:ZDB-GENE-030131-8626]	GO:0000462(maturation of SSU-rRNA from tricistronic rRNA transcript (SSU-rRNA, 5.8S rRNA, LSU-rRNA));GO:0003735(structural constituent of ribosome);GO:0005622(intracellular);GO:0005840(ribosome);GO:0006412(translation);GO:0022627(cytosolic small ribosomal subunit);GO:0043009(chordate embryonic development);GO:0051726(regulation of cell cycle)	03010(Ribosome)	K02995	NA
1	ENSDARG00000007320	rpl7	54.9776	42.7456	0.363067	1.81284e-223	5.02375e-219	ribosomal protein L7 [Source:ZFIN;Acc:ZDB-GENE-030131-8654]	GO:0000463(maturation of LSU-rRNA from tricistronic rRNA transcript (SSU-rRNA, 5.8S rRNA, LSU-rRNA));GO:0003735(structural constituent of ribosome);GO:0005840(ribosome);GO:0022625(cytosolic large ribosomal subunit);GO:0051726(regulation of cell cycle)	03010(Ribosome)	K02937	NA
1	ENSDARG00000056008	atp5mc1	2.47807	2.03375	0.285071	2.55447e-223	7.07895e-219	ATP synthase membrane subunit c locus 1 [Source:ZFIN;Acc:ZDB-GENE-040426-1966]	GO:0000276(mitochondrial proton-transporting ATP synthase complex, coupling factor F(o));GO:0006811(ion transport);GO:0008289(lipid binding);GO:0015078(proton transmembrane transporter activity);GO:0015986(ATP synthesis coupled proton transport);GO:0015991(ATP hydrolysis coupled proton transport);GO:0016020(membrane);GO:0016021(integral component of membrane);GO:0033177(proton-transporting two-se…	00190(Oxidative phosphorylation)	K02128	NA
1	ENSDARG00000042905	rpl10a	61.1806	46.7471	0.388199	5.15189e-221	1.42769e-216	ribosomal protein L10a [Source:ZFIN;Acc:ZDB-GENE-030131-2025]	GO:0000470(maturation of LSU-rRNA);GO:0003723(RNA binding);GO:0003735(structural constituent of ribosome);GO:0005840(ribosome);GO:0006412(translation);GO:0015934(large ribosomal subunit);GO:0022625(cytosolic large ribosomal subunit)	03010(Ribosome)	K02865	NA
1	ENSDARG00000044093	rpl13a	43.6164	34.2993	0.346693	1.82882e-220	5.06802e-216	ribosomal protein L13a [Source:ZFIN;Acc:ZDB-GENE-030131-168]	GO:0003729(mRNA binding);GO:0003735(structural constituent of ribosome);GO:0005840(ribosome);GO:0006412(translation);GO:0015934(large ribosomal subunit);GO:0017148(negative regulation of translation);GO:0022625(cytosolic large ribosomal subunit)	03010(Ribosome)	K02872	NA
1	ENSDARG00000044565	ola1	2.96081	2.4677	0.262823	8.28813e-220	2.29681e-215	Obg-like ATPase 1 [Source:ZFIN;Acc:ZDB-GENE-030131-5063]	GO:0000166(nucleotide binding);GO:0005524(ATP binding);GO:0005525(GTP binding);GO:0005634(nucleus);GO:0005730(nucleolus);GO:0005737(cytoplasm);GO:0016787(hydrolase activity);GO:0016887(ATPase activity);GO:0043022(ribosome binding);GO:0043023(ribosomal large subunit binding);GO:0046872(metal ion binding)	NA	K19788	NA
1	ENSDARG00000029533	rpl18	54.968	42.2942	0.378133	1.31841e-218	3.65359e-214	ribosomal protein L18 [Source:ZFIN;Acc:ZDB-GENE-040801-165]	GO:0003735(structural constituent of ribosome);GO:0005622(intracellular);GO:0005840(ribosome);GO:0006412(translation);GO:0022625(cytosolic large ribosomal subunit)	03010(Ribosome)	K02883	NA
1	ENSDARG00000035871	rpl30	43.4944	35.1768	0.306205	4.97937e-216	1.37988e-211	ribosomal protein L30 [Source:ZFIN;Acc:ZDB-GENE-030131-8657]	GO:0003723(RNA binding);GO:0003735(structural constituent of ribosome);GO:0005622(intracellular);GO:0005840(ribosome);GO:0006412(translation);GO:0022625(cytosolic large ribosomal subunit)	03010(Ribosome)	K02908	NA
1	ENSDARG00000042566	rps7	62.1925	48.945	0.34558	8.2174e-206	2.27721e-201	ribosomal protein S7 [Source:ZFIN;Acc:ZDB-GENE-040426-1718]	GO:0003735(structural constituent of ribosome);GO:0005622(intracellular);GO:0005840(ribosome);GO:0006364(rRNA processing);GO:0006412(translation);GO:0022627(cytosolic small ribosomal subunit);GO:0030097(hemopoiesis);GO:0032040(small-subunit processome);GO:0042274(ribosomal small subunit biogenesis);GO:0043009(chordate embryonic development);GO:0051726(regulation of cell cycle)	03010(Ribosome)	K02993	NA
1	ENSDARG00000070849	rps15	48.104	39.1575	0.296868	2.14087e-205	5.93277e-201	ribosomal protein S15 [Source:ZFIN;Acc:ZDB-GENE-030131-9092]	GO:0000028(ribosomal small subunit assembly);GO:0003723(RNA binding);GO:0003735(structural constituent of ribosome);GO:0005840(ribosome);GO:0006412(translation);GO:0015935(small ribosomal subunit);GO:0022627(cytosolic small ribosomal subunit);GO:0043009(chordate embryonic development)	03010(Ribosome)	K02958	NA
1	ENSDARG00000099022	faua	35.6204	29.4368	0.275083	1.62373e-202	4.49967e-198	Finkel-Biskis-Reilly murine sarcoma virus (FBR-MuSV) ubiquitously expressed a [Source:ZFIN;Acc:ZDB-GENE-040426-1700]	GO:0003735(structural constituent of ribosome);GO:0005515(protein binding);GO:0005622(intracellular);GO:0005840(ribosome);GO:0006412(translation);GO:0022627(cytosolic small ribosomal subunit)	03010(Ribosome)	K02983	NA
[truncated: 8,178 more rows]

## Sheet: Average expression profile
Average expression profile of 13 immune-cell and renal cell categories
[truncated: 26,842 more rows]

## Sheet: Number and percentage of cells 
Number and percentage of cells in each cluster of immune-cell and renal cell categories
Clusters	0	1	2	3	4	5	6	7	8	9	10	11	12	Total
[truncated: 3 more rows]

## Sheet: DEG after infection-C0
Genename	p_val	avg_log2FC	pct.1	pct.2	p_val_adj	Sig
CR318588.1	0	2.89632	0.924	0.535	0	up
hbba1.1	3.19909e-302	-1.48301	0.081	0.522	8.86531e-298	down
[truncated: 403 more rows]

## Sheet: DEG after infection-C1
Genename	p_val	avg_log2FC	pct.1	pct.2	p_val_adj	Sig
[truncated: 862 more rows]

[truncated: 11 more sheets: DEG after infection-C2, DEG after infection-C3, DEG after infection-C4, DEG after infection-C5, DEG after infection-C6, DEG after infection-C7, DEG after infection-8, DEG after infection-C9, DEG after infection-C10, DEG after infection-C11, DEG after infection-C12]
