# Supplementary material for: Single-cell RNA sequencing unveils the hidden powers of zebrafish kidney for generating both hematopoiesis and adaptive antiviral immunity
Source: eLife. 2024 Mar 18;13:RP92424. doi: 10.7554/eLife.92424 (PMC10948150; doi:10.7554/eLife.92424)
Supplement: Supplementary file 4. [file elife-92424-supp4.xlsx]

## Sheet: Marker gene list
Supplementary file 4. Marker gene list of T/NK cell subsets
Target_Cluster	GeneID	GeneName	Target_Cluster_mean	Other_Cluster_mean	log2FC	pct.1	pct.2	Pvlaue	Qvalue	Description	GO	KEGG	KO_ENTRY	EC
0	ENSDARG00000094002	ccl34b.4	32.1473	24.4302	0.396031	0.867	0.414	2.65126e-55	7.34716e-51	chemokine (C-C motif) ligand 34b, duplicate 4 [Source:ZFIN;Acc:ZDB-GENE-091204-344]	GO:0002548(monocyte chemotaxis);GO:0005576(extracellular region);GO:0005615(extracellular space);GO:0006954(inflammatory response);GO:0006955(immune response);GO:0007186(G protein-coupled receptor signaling pathway);GO:0008009(chemokine activity);GO:0030593(neutrophil chemotaxis);GO:0043547(positive regulation of GTPase activity);GO:0048020(CCR chemokine receptor binding);GO:0048247(lymphocyte ch…	NA	NA	NA
0	ENSDARG00000014329	npm1a	10.2833	4.45447	1.20697	0.84	0.534	3.15337e-47	8.73861e-43	nucleophosmin 1a [Source:ZFIN;Acc:ZDB-GENE-021028-1]	GO:0003676(nucleic acid binding);GO:0003682(chromatin binding);GO:0005654(nucleoplasm);GO:0005730(nucleolus);GO:0005737(cytoplasm);GO:0006338(chromatin remodeling);GO:0030097(hemopoiesis);GO:0042393(histone binding);GO:0042981(regulation of apoptotic process)	NA	K11276	NA
0	ENSDARG00000055996	rps8a	67.1027	49.152	0.449122	1	0.99	7.02349e-44	1.94635e-39	ribosomal protein S8a [Source:ZFIN;Acc:ZDB-GENE-030131-8626]	GO:0000462(maturation of SSU-rRNA from tricistronic rRNA transcript (SSU-rRNA, 5.8S rRNA, LSU-rRNA));GO:0003735(structural constituent of ribosome);GO:0005622(intracellular);GO:0005840(ribosome);GO:0006412(translation);GO:0022627(cytosolic small ribosomal subunit);GO:0043009(chordate embryonic development);GO:0051726(regulation of cell cycle)	03010(Ribosome)	K02995	NA
0	ENSDARG00000011201	rplp2l	76.022	53.0324	0.519542	1	0.989	9.57243e-41	2.65271e-36	ribosomal protein, large P2, like [Source:ZFIN;Acc:ZDB-GENE-070327-2]	GO:0003735(structural constituent of ribosome);GO:0005622(intracellular);GO:0005840(ribosome);GO:0006414(translational elongation);GO:0043009(chordate embryonic development)	03010(Ribosome)	K02943	NA
0	ENSDARG00000043453	rps5	70.6891	52.4143	0.431526	0.997	0.992	3.72097e-40	1.03116e-35	ribosomal protein S5 [Source:ZFIN;Acc:ZDB-GENE-020419-12]	GO:0000028(ribosomal small subunit assembly);GO:0003723(RNA binding);GO:0003729(mRNA binding);GO:0003735(structural constituent of ribosome);GO:0005840(ribosome);GO:0006412(translation);GO:0015935(small ribosomal subunit);GO:0019843(rRNA binding);GO:0022627(cytosolic small ribosomal subunit)	03010(Ribosome)	K02989	NA
0	ENSDARG00000021864	rplp1	98.7127	75.6402	0.384083	1	0.999	1.34793e-39	3.73539e-35	ribosomal protein, large, P1 [Source:ZFIN;Acc:ZDB-GENE-030131-8663]	GO:0002181(cytoplasmic translation);GO:0003735(structural constituent of ribosome);GO:0005622(intracellular);GO:0005840(ribosome);GO:0006414(translational elongation);GO:0022625(cytosolic large ribosomal subunit);GO:0030218(erythrocyte differentiation);GO:0030295(protein kinase activator activity);GO:0032147(activation of protein kinase activity);GO:0043021(ribonucleoprotein complex binding)	03010(Ribosome)	K02942	NA
0	ENSDARG00000090380	gzma	2.10493	1.02053	1.04445	0.391	0.08	1.62045e-38	4.49059e-34	granzyme A [Source:ZFIN;Acc:ZDB-GENE-091204-156]	GO:0004252(serine-type endopeptidase activity);GO:0006508(proteolysis)	NA	K08663	EC:3.4.21.-
0	ENSDARG00000092191	CR318588.1	310.922	187.043	0.733184	0.976	0.848	2.49886e-37	6.92483e-33	uncharacterized LOC100535167 [Source:NCBI gene;Acc:100535167]	NA	NA	NA	NA
0	ENSDARG00000035692	rps3a	59.4999	45.459	0.388319	0.997	0.992	1.66825e-36	4.62306e-32	ribosomal protein S3A [Source:ZFIN;Acc:ZDB-GENE-030131-9184]	GO:0003735(structural constituent of ribosome);GO:0005622(intracellular);GO:0005737(cytoplasm);GO:0005829(cytosol);GO:0005840(ribosome);GO:0006412(translation);GO:0022627(cytosolic small ribosomal subunit);GO:0043009(chordate embryonic development)	03010(Ribosome)	K02984	NA
0	ENSDARG00000010516	rpl21	59.3453	46.2916	0.358383	1	0.988	4.28682e-36	1.18796e-31	ribosomal protein L21 [Source:ZFIN;Acc:ZDB-GENE-030131-8512]	GO:0003735(structural constituent of ribosome);GO:0005622(intracellular);GO:0005840(ribosome);GO:0006412(translation);GO:0022625(cytosolic large ribosomal subunit)	03010(Ribosome)	K02889	NA
0	ENSDARG00000007320	rpl7	58.63	43.3519	0.435543	0.993	0.985	1.03802e-35	2.87657e-31	ribosomal protein L7 [Source:ZFIN;Acc:ZDB-GENE-030131-8654]	GO:0000463(maturation of LSU-rRNA from tricistronic rRNA transcript (SSU-rRNA, 5.8S rRNA, LSU-rRNA));GO:0003735(structural constituent of ribosome);GO:0005840(ribosome);GO:0022625(cytosolic large ribosomal subunit);GO:0051726(regulation of cell cycle)	03010(Ribosome)	K02937	NA
0	ENSDARG00000105592	CR936442.1	27.1298	15.6586	0.792927	0.939	0.69	5.45527e-35	1.51176e-30	NA	NA	NA	NA	NA
0	ENSDARG00000053457	rpl23	90.0056	65.2655	0.463694	0.997	0.994	1.01677e-34	2.81768e-30	ribosomal protein L23 [Source:ZFIN;Acc:ZDB-GENE-030131-8756]	GO:0003735(structural constituent of ribosome);GO:0005840(ribosome);GO:0006412(translation);GO:0022625(cytosolic large ribosomal subunit);GO:0070180(large ribosomal subunit rRNA binding)	03010(Ribosome)	K02894	NA
0	ENSDARG00000042905	rpl10a	61.0796	48.5	0.332706	0.993	0.988	2.40661e-34	6.66921e-30	ribosomal protein L10a [Source:ZFIN;Acc:ZDB-GENE-030131-2025]	GO:0000470(maturation of LSU-rRNA);GO:0003723(RNA binding);GO:0003735(structural constituent of ribosome);GO:0005840(ribosome);GO:0006412(translation);GO:0015934(large ribosomal subunit);GO:0022625(cytosolic large ribosomal subunit)	03010(Ribosome)	K02865	NA
0	ENSDARG00000036629	rps14	76.2242	57.2285	0.413515	0.997	0.993	3.5768e-33	9.91204e-29	ribosomal protein S14 [Source:ZFIN;Acc:ZDB-GENE-030131-8631]	GO:0000028(ribosomal small subunit assembly);GO:0000462(maturation of SSU-rRNA from tricistronic rRNA transcript (SSU-rRNA, 5.8S rRNA, LSU-rRNA));GO:0003735(structural constituent of ribosome);GO:0005840(ribosome);GO:0006412(translation);GO:0022627(cytosolic small ribosomal subunit);GO:0043009(chordate embryonic development);GO:0043249(erythrocyte maturation);GO:0048027(mRNA 5'-UTR binding);GO:00…	03010(Ribosome)	K02955	NA
0	ENSDARG00000011405	rps9	66.9522	50.2584	0.413767	1	0.995	6.05438e-33	1.67779e-28	ribosomal protein S9 [Source:ZFIN;Acc:ZDB-GENE-010724-15]	GO:0003723(RNA binding);GO:0003735(structural constituent of ribosome);GO:0005622(intracellular);GO:0005840(ribosome);GO:0006412(translation);GO:0015935(small ribosomal subunit);GO:0019843(rRNA binding);GO:0022627(cytosolic small ribosomal subunit);GO:0045903(positive regulation of translational fidelity)	03010(Ribosome)	K02997	NA
0	ENSDARG00000017860	rgs5b	5.13745	1.52124	1.7558	0.357	0.08	1.13334e-32	3.14072e-28	regulator of G protein signaling 5b [Source:ZFIN;Acc:ZDB-GENE-050417-359]	NA	NA	K16449	NA
0	ENSDARG00000023298	rps27.1	60.4254	46.8041	0.36852	1	0.989	2.31536e-32	6.41634e-28	ribosomal protein S27, isoform 1 [Source:ZFIN;Acc:ZDB-GENE-050522-549]	GO:0000028(ribosomal small subunit assembly);GO:0003735(structural constituent of ribosome);GO:0005622(intracellular);GO:0005840(ribosome);GO:0006412(translation);GO:0022627(cytosolic small ribosomal subunit);GO:0030218(erythrocyte differentiation);GO:0046872(metal ion binding)	03010(Ribosome)	K02978	NA
0	ENSDARG00000090337	pprc1	2.97242	1.45844	1.02721	0.541	0.212	1.68526e-31	4.67018e-27	peroxisome proliferator-activated receptor gamma, coactivator-related 1 [Source:ZFIN;Acc:ZDB-GENE-030131-9858]	GO:0003676(nucleic acid binding);GO:0003712(transcription coregulator activity);GO:0003723(RNA binding);GO:0005634(nucleus);GO:0008134(transcription factor binding);GO:0030374(nuclear receptor transcription coactivator activity);GO:0045944(positive regulation of transcription by RNA polymerase II);GO:0051091(positive regulation of DNA-binding transcription factor activity)	NA	K17963	NA
0	ENSDARG00000025073	rpl18a	62.8879	49.2052	0.353971	0.997	0.994	1.74725e-31	4.84199e-27	ribosomal protein L18a [Source:ZFIN;Acc:ZDB-GENE-040426-1071]	GO:0003735(structural constituent of ribosome);GO:0005840(ribosome);GO:0006412(translation);GO:0022625(cytosolic large ribosomal subunit)	03010(Ribosome)	K02882	NA
0	ENSDARG00000015128	rpl27	48.4783	36.6469	0.403648	0.993	0.982	2.30048e-31	6.37509e-27	ribosomal protein L27 [Source:ZFIN;Acc:ZDB-GENE-030131-4343]	GO:0003735(structural constituent of ribosome);GO:0005622(intracellular);GO:0005737(cytoplasm);GO:0005783(endoplasmic reticulum);GO:0005791(rough endoplasmic reticulum);GO:0005829(cytosol);GO:0005840(ribosome);GO:0006412(translation);GO:0015934(large ribosomal subunit);GO:0022625(cytosolic large ribosomal subunit);GO:0030218(erythrocyte differentiation);GO:0098556(cytoplasmic side of rough endopl…	03010(Ribosome)	K02901	NA
0	ENSDARG00000036044	rps20	84.6055	67.0404	0.33572	1	0.996	1.06024e-30	2.93814e-26	ribosomal protein S20 [Source:ZFIN;Acc:ZDB-GENE-040426-2284]	NA	03010(Ribosome)	K02969	NA
0	ENSDARG00000037350	rpl9.1	48.0927	36.7407	0.388436	0.99	0.98	2.05863e-30	5.70487e-26	ribosomal protein L9 [Source:ZFIN;Acc:ZDB-GENE-030131-8646]	GO:0002181(cytoplasmic translation);GO:0003735(structural constituent of ribosome);GO:0005622(intracellular);GO:0005840(ribosome);GO:0006412(translation);GO:0019843(rRNA binding);GO:0022625(cytosolic large ribosomal subunit)	03010(Ribosome)	K02940	NA
0	ENSDARG00000034291	rpl37.1	65.8915	51.4393	0.357223	0.997	0.99	2.71931e-30	7.53576e-26	ribosomal protein L37 [Source:ZFIN;Acc:ZDB-GENE-040625-39]	GO:0003723(RNA binding);GO:0003735(structural constituent of ribosome);GO:0005622(intracellular);GO:0005840(ribosome);GO:0006412(translation);GO:0019843(rRNA binding);GO:0046872(metal ion binding)	03010(Ribosome)	K02922	NA
0	ENSDARG00000054818	rpl32	64.1019	51.5766	0.313651	0.997	0.995	4.33521e-30	1.20137e-25	ribosomal protein L32 [Source:ZFIN;Acc:ZDB-GENE-060331-105]	GO:0003735(structural constituent of ribosome);GO:0005622(intracellular);GO:0005840(ribosome);GO:0006412(translation);GO:0022625(cytosolic large ribosomal subunit)	03010(Ribosome)	K02912	NA
0	ENSDARG00000043509	rpl11	59.2652	46.6621	0.344934	1	0.989	1.28709e-29	3.56679e-25	ribosomal protein L11 [Source:ZFIN;Acc:ZDB-GENE-040625-147]	GO:0000027(ribosomal large subunit assembly);GO:0003735(structural constituent of ribosome);GO:0005622(intracellular);GO:0005840(ribosome);GO:0006412(translation);GO:0006915(apoptotic process);GO:0022625(cytosolic large ribosomal subunit);GO:0030097(hemopoiesis);GO:0030218(erythrocyte differentiation);GO:0042541(hemoglobin biosynthetic process);GO:0042593(glucose homeostasis);GO:0043009(chordate …	03010(Ribosome)	K02868	NA
0	ENSDARG00000018334	rpl35	60.3453	46.0725	0.389336	1	0.985	1.72768e-29	4.78774e-25	ribosomal protein L35 [Source:ZFIN;Acc:ZDB-GENE-020419-2]	GO:0000463(maturation of LSU-rRNA from tricistronic rRNA transcript (SSU-rRNA, 5.8S rRNA, LSU-rRNA));GO:0003729(mRNA binding);GO:0003735(structural constituent of ribosome);GO:0005622(intracellular);GO:0005840(ribosome);GO:0006412(translation);GO:0007275(multicellular organism development);GO:0022625(cytosolic large ribosomal subunit);GO:0030218(erythrocyte differentiation);GO:0043009(chordate em…	03010(Ribosome)	K02918	NA
0	ENSDARG00000025581	rpl10	65.8856	53.7532	0.293614	1	0.993	1.86694e-29	5.17366e-25	ribosomal protein L10 [Source:ZFIN;Acc:ZDB-GENE-030131-8656]	GO:0000027(ribosomal large subunit assembly);GO:0003735(structural constituent of ribosome);GO:0005622(intracellular);GO:0005840(ribosome);GO:0006412(translation);GO:0006417(regulation of translation);GO:0007275(multicellular organism development);GO:0007420(brain development);GO:0022625(cytosolic large ribosomal subunit);GO:0045182(translation regulator activity);GO:1990403(embryonic brain devel…	03010(Ribosome)	K02866	NA
0	ENSDARG00000042566	rps7	67.5032	51.5858	0.387984	0.993	0.99	6.70765e-29	1.85882e-24	ribosomal protein S7 [Source:ZFIN;Acc:ZDB-GENE-040426-1718]	GO:0003735(structural constituent of ribosome);GO:0005622(intracellular);GO:0005840(ribosome);GO:0006364(rRNA processing);GO:0006412(translation);GO:0022627(cytosolic small ribosomal subunit);GO:0030097(hemopoiesis);GO:0032040(small-subunit processome);GO:0042274(ribosomal small subunit biogenesis);GO:0043009(chordate embryonic development);GO:0051726(regulation of cell cycle)	03010(Ribosome)	K02993	NA
0	ENSDARG00000014867	rpl8	61.5301	46.9083	0.391451	0.997	0.985	3.54703e-28	9.82954e-24	ribosomal protein L8 [Source:ZFIN;Acc:ZDB-GENE-040426-1670]	GO:0002181(cytoplasmic translation);GO:0003723(RNA binding);GO:0003735(structural constituent of ribosome);GO:0005737(cytoplasm);GO:0005840(ribosome);GO:0006412(translation);GO:0015934(large ribosomal subunit);GO:0019843(rRNA binding);GO:0022625(cytosolic large ribosomal subunit)	03010(Ribosome)	K02938	NA
0	ENSDARG00000101609	si:dkey-109a10.2	5.22573	2.88193	0.858599	0.66	0.316	8.94334e-28	2.47838e-23	si:dkey-109a10.2 [Source:ZFIN;Acc:ZDB-GENE-141212-404]	GO:0016020(membrane);GO:0016021(integral component of membrane)	NA	NA	NA
0	ENSDARG00000077291	rps2	77.0447	64.3065	0.260731	0.997	0.993	2.51973e-27	6.98268e-23	ribosomal protein S2 [Source:ZFIN;Acc:ZDB-GENE-040426-2454]	GO:0003723(RNA binding);GO:0003735(structural constituent of ribosome);GO:0005840(ribosome);GO:0006412(translation);GO:0015935(small ribosomal subunit);GO:0022627(cytosolic small ribosomal subunit);GO:1990904(ribonucleoprotein complex)	03010(Ribosome)	K02981	NA
0	ENSDARG00000057556	rpl17	62.7896	48.9452	0.359359	0.99	0.991	2.86436e-27	7.93772e-23	ribosomal protein L17 [Source:ZFIN;Acc:ZDB-GENE-030131-8585]	GO:0002181(cytoplasmic translation);GO:0003735(structural constituent of ribosome);GO:0005622(intracellular);GO:0005840(ribosome);GO:0006412(translation);GO:0015934(large ribosomal subunit);GO:0022625(cytosolic large ribosomal subunit)	03010(Ribosome)	K02880	NA
0	ENSDARG00000030408	rps26l	57.2394	41.4647	0.465123	0.993	0.985	3.38261e-27	9.37389e-23	ribosomal protein S26, like [Source:ZFIN;Acc:ZDB-GENE-040426-1706]	GO:0003729(mRNA binding);GO:0003735(structural constituent of ribosome);GO:0005622(intracellular);GO:0005840(ribosome);GO:0006412(translation);GO:0022627(cytosolic small ribosomal subunit)	03010(Ribosome)	K02976	NA
0	ENSDARG00000039347	rps24	59.619	46.498	0.358602	0.997	0.989	4.42237e-27	1.22553e-22	ribosomal protein S24 [Source:ZFIN;Acc:ZDB-GENE-040109-5]	GO:0003735(structural constituent of ribosome);GO:0005622(intracellular);GO:0005840(ribosome);GO:0006412(translation);GO:0060215(primitive hemopoiesis);GO:0060216(definitive hemopoiesis)	03010(Ribosome)	K02974	NA
0	ENSDARG00000069482	traf1	9.79628	6.05427	0.69428	0.799	0.486	5.67167e-27	1.57173e-22	TNF receptor-associated factor 1 [Source:ZFIN;Acc:ZDB-GENE-071120-4]	GO:0005164(tumor necrosis factor receptor binding);GO:0005515(protein binding);GO:0007165(signal transduction);GO:0008270(zinc ion binding);GO:0031625(ubiquitin protein ligase binding);GO:0031996(thioesterase binding);GO:0032991(protein-containing complex);GO:0042981(regulation of apoptotic process);GO:0046872(metal ion binding)	04210(Apoptosis)	K03172	NA
0	ENSDARG00000036875	rps12	64.4181	47.8678	0.428411	0.997	0.983	5.68008e-27	1.57406e-22	ribosomal protein S12 [Source:ZFIN;Acc:ZDB-GENE-030131-8951]	GO:0003735(structural constituent of ribosome);GO:0005622(intracellular);GO:0005840(ribosome);GO:0006412(translation);GO:0022627(cytosolic small ribosomal subunit)	03010(Ribosome)	K02951	NA
0	ENSDARG00000006691	rpl12	63.8464	49.6654	0.362365	0.997	0.994	6.5078e-27	1.80344e-22	ribosomal protein L12 [Source:ZFIN;Acc:ZDB-GENE-030131-5297]	GO:0000027(ribosomal large subunit assembly);GO:0003735(structural constituent of ribosome);GO:0005840(ribosome);GO:0006412(translation);GO:0015934(large ribosomal subunit);GO:0019843(rRNA binding);GO:0022625(cytosolic large ribosomal subunit);GO:0070180(large ribosomal subunit rRNA binding)	03010(Ribosome)	K02870	NA
0	ENSDARG00000099022	faua	44.8249	34.7571	0.366994	0.997	0.979	3.91835e-26	1.08585e-21	Finkel-Biskis-Reilly murine sarcoma virus (FBR-MuSV) ubiquitously expressed a [Source:ZFIN;Acc:ZDB-GENE-040426-1700]	GO:0003735(structural constituent of ribosome);GO:0005515(protein binding);GO:0005622(intracellular);GO:0005840(ribosome);GO:0006412(translation);GO:0022627(cytosolic small ribosomal subunit)	03010(Ribosome)	K02983	NA
0	ENSDARG00000021838	rps23	62.4781	47.8833	0.383828	1	0.989	4.30459e-26	1.19289e-21	ribosomal protein S23 [Source:ZFIN;Acc:ZDB-GENE-080220-50]	GO:0003735(structural constituent of ribosome);GO:0005840(ribosome);GO:0006412(translation);GO:0015935(small ribosomal subunit);GO:0022627(cytosolic small ribosomal subunit)	03010(Ribosome)	K02973	NA
0	ENSDARG00000003941	rrs1	2.9222	1.72969	0.756536	0.588	0.276	6.1312e-26	1.69908e-21	RRS1 ribosome biogenesis regulator homolog (S. cerevisiae) [Source:ZFIN;Acc:ZDB-GENE-030131-9345]	GO:0000055(ribosomal large subunit export from nucleus);GO:0000447(endonucleolytic cleavage in ITS1 to separate SSU-rRNA from 5.8S rRNA and LSU-rRNA from tricistronic rRNA transcript (SSU-rRNA, 5.8S rRNA, LSU-rRNA));GO:0003674(molecular_function);GO:0005634(nucleus);GO:0005730(nucleolus);GO:0030687(preribosome, large subunit precursor);GO:0042254(ribosome biogenesis);GO:0042273(ribosomal large su…	NA	K14852	NA
0	ENSDARG00000007358	cxcr3.1.1	4.14632	2.3509	0.818623	0.602	0.274	1.10792e-25	3.07026e-21	chemokine (C-X-C motif) receptor 3, tandem duplicate 1 [Source:ZFIN;Acc:ZDB-GENE-060130-38]	GO:0002685(regulation of leukocyte migration);GO:0004930(G protein-coupled receptor activity);GO:0004950(chemokine receptor activity);GO:0006935(chemotaxis);GO:0006954(inflammatory response);GO:0006955(immune response);GO:0007165(signal transduction);GO:0007186(G protein-coupled receptor signaling pathway);GO:0007204(positive regulation of cytosolic calcium ion concentration);GO:0009897(external …	04060(Cytokine-cytokine receptor interaction)	K04188	NA
0	ENSDARG00000104011	rps17	42.8028	32.5369	0.395626	0.993	0.978	1.62581e-25	4.50545e-21	ribosomal protein S17 [Source:ZFIN;Acc:ZDB-GENE-040426-1852]	GO:0003735(structural constituent of ribosome);GO:0005622(intracellular);GO:0005840(ribosome);GO:0006412(translation)	03010(Ribosome)	K02962	NA
0	ENSDARG00000099380	rpl13	67.1587	55.7062	0.269736	1	0.993	6.85176e-25	1.89876e-20	ribosomal protein L13 [Source:ZFIN;Acc:ZDB-GENE-031007-1]	GO:0003735(structural constituent of ribosome);GO:0005622(intracellular);GO:0005840(ribosome);GO:0006412(translation);GO:0022625(cytosolic large ribosomal subunit);GO:0051726(regulation of cell cycle)	03010(Ribosome)	K02873	NA
0	ENSDARG00000104353	nop58	4.47321	2.54556	0.813328	0.707	0.401	7.06156e-25	1.9569e-20	NOP58 ribonucleoprotein homolog (yeast) [Source:ZFIN;Acc:ZDB-GENE-040426-2140]	GO:0030515(snoRNA binding);GO:0031428(box C/D snoRNP complex);GO:0032040(small-subunit processome)	03008(Ribosome biogenesis in eukaryotes)	K14565	NA
0	ENSDARG00000053136	b2m	53.2049	41.9463	0.343014	0.997	0.992	1.299e-24	3.59979e-20	beta-2-microglobulin [Source:ZFIN;Acc:ZDB-GENE-980526-88]	GO:0002376(immune system process);GO:0002474(antigen processing and presentation of peptide antigen via MHC class I);GO:0002755(MyD88-dependent toll-like receptor signaling pathway);GO:0004672(protein kinase activity);GO:0005515(protein binding);GO:0005524(ATP binding);GO:0005576(extracellular region);GO:0006468(protein phosphorylation);GO:0006955(immune response);GO:0007165(signal transduction);…	05168(Herpes simplex virus 1 infection)	K08055	NA
0	ENSDARG00000023299	snu13b	2.49537	1.44526	0.787928	0.551	0.246	1.4248e-24	3.9484e-20	SNU13 homolog, small nuclear ribonucleoprotein b (U4/U6.U5) [Source:ZFIN;Acc:ZDB-GENE-030131-9670]	GO:0000398(mRNA splicing, via spliceosome);GO:0000470(maturation of LSU-rRNA);GO:0003723(RNA binding);GO:0005730(nucleolus);GO:0031428(box C/D snoRNP complex);GO:0032040(small-subunit processome);GO:0042254(ribosome biogenesis);GO:0046540(U4/U6 x U5 tri-snRNP complex);GO:0061053(somite development);GO:1990904(ribonucleoprotein complex)	03008(Ribosome biogenesis in eukaryotes);03040(Spliceosome)	K12845	NA
0	ENSDARG00000051783	rplp0	57.9915	48.0084	0.272554	1	0.99	5.33422e-24	1.47822e-19	ribosomal protein, large, P0 [Source:ZFIN;Acc:ZDB-GENE-000629-1]	GO:0005622(intracellular);GO:0005840(ribosome);GO:0042254(ribosome biogenesis)	03010(Ribosome)	K02941	NA
0	ENSDARG00000016484	dkc1	2.29602	1.28129	0.841531	0.486	0.204	1.47973e-23	4.10063e-19	dyskeratosis congenita 1, dyskerin [Source:ZFIN;Acc:ZDB-GENE-031118-120]	GO:0000495(box H/ACA snoRNA 3'-end processing);GO:0001522(pseudouridine synthesis);GO:0003723(RNA binding);GO:0006364(rRNA processing);GO:0006396(RNA processing);GO:0009451(RNA modification);GO:0009982(pseudouridine synthase activity);GO:0031118(rRNA pseudouridine synthesis);GO:0031120(snRNA pseudouridine synthesis);GO:0031429(box H/ACA snoRNP complex);GO:0060216(definitive hemopoiesis);GO:199048…	03008(Ribosome biogenesis in eukaryotes)	K11131	EC:5.4.99.-
0	ENSDARG00000005791	rpl28	50.1954	39.7517	0.336538	0.997	0.988	1.77394e-23	4.91593e-19	ribosomal protein L28 [Source:ZFIN;Acc:ZDB-GENE-040930-10]	GO:0003735(structural constituent of ribosome);GO:0005622(intracellular);GO:0005840(ribosome);GO:0006412(translation);GO:0022625(cytosolic large ribosomal subunit);GO:0043009(chordate embryonic development)	03010(Ribosome)	K02903	NA
0	ENSDARG00000028780	gzmk	1.57769	0.885081	0.833933	0.333	0.093	2.3604e-23	6.54115e-19	granzyme K [Source:ZFIN;Acc:ZDB-GENE-091204-352]	GO:0004252(serine-type endopeptidase activity);GO:0006508(proteolysis)	NA	K08663	EC:3.4.21.-
0	ENSDARG00000002710	ncl	14.2072	8.77607	0.694977	0.929	0.823	3.7369e-23	1.03557e-18	nucleolin [Source:ZFIN;Acc:ZDB-GENE-030131-6986]	GO:0001947(heart looping);GO:0003676(nucleic acid binding);GO:0003723(RNA binding);GO:0003729(mRNA binding);GO:0005634(nucleus);GO:0005737(cytoplasm);GO:0006364(rRNA processing);GO:0009303(rRNA transcription);GO:0071014(post-mRNA release spliceosomal complex);GO:1990904(ribonucleoprotein complex);GO:2000815(regulation of mRNA stability involved in response to oxidative stress)	NA	K11294	NA
0	ENSDARG00000041811	rps25	48.344	38.9329	0.312345	0.993	0.983	9.9699e-23	2.76286e-18	ribosomal protein S25 [Source:ZFIN;Acc:ZDB-GENE-040426-1788]	GO:0005840(ribosome)	03010(Ribosome)	K02975	NA
0	ENSDARG00000036298	rps13	52.3176	42.6132	0.295994	0.997	0.992	3.04155e-22	8.42876e-18	ribosomal protein S13 [Source:ZFIN;Acc:ZDB-GENE-040625-52]	GO:0003735(structural constituent of ribosome);GO:0005622(intracellular);GO:0005730(nucleolus);GO:0005840(ribosome);GO:0006412(translation);GO:0022627(cytosolic small ribosomal subunit);GO:0070181(small ribosomal subunit rRNA binding)	03010(Ribosome)	K02953	NA
0	ENSDARG00000019230	rpl7a	57.2736	46.2296	0.309053	0.993	0.986	1.22794e-21	3.40286e-17	ribosomal protein L7a [Source:ZFIN;Acc:ZDB-GENE-031001-9]	GO:0000470(maturation of LSU-rRNA);GO:0003723(RNA binding);GO:0005840(ribosome);GO:0022625(cytosolic large ribosomal subunit);GO:0042254(ribosome biogenesis);GO:1990904(ribonucleoprotein complex)	03010(Ribosome)	K02936	NA
0	ENSDARG00000058105	rpl36a	56.5913	45.1702	0.325208	1	0.992	7.39862e-21	2.0503e-16	ribosomal protein L36A [Source:ZFIN;Acc:ZDB-GENE-020423-1]	GO:0003735(structural constituent of ribosome);GO:0005622(intracellular);GO:0005737(cytoplasm);GO:0005840(ribosome);GO:0006412(translation);GO:0022625(cytosolic large ribosomal subunit);GO:0043009(chordate embryonic development);GO:0051726(regulation of cell cycle)	03010(Ribosome)	K02929	NA
0	ENSDARG00000044093	rpl13a	46.046	36.4331	0.337826	0.997	0.981	7.74454e-21	2.14617e-16	ribosomal protein L13a [Source:ZFIN;Acc:ZDB-GENE-030131-168]	GO:0003729(mRNA binding);GO:0003735(structural constituent of ribosome);GO:0005840(ribosome);GO:0006412(translation);GO:0015934(large ribosomal subunit);GO:0017148(negative regulation of translation);GO:0022625(cytosolic large ribosomal subunit)	03010(Ribosome)	K02872	NA
0	ENSDARG00000053912	fbl	2.40961	1.44583	0.736902	0.531	0.256	8.16089e-21	2.26155e-16	fibrillarin [Source:ZFIN;Acc:ZDB-GENE-040426-1936]	GO:0000494(box C/D snoRNA 3'-end processing);GO:0003723(RNA binding);GO:0005730(nucleolus);GO:0006364(rRNA processing);GO:0008168(methyltransferase activity);GO:0008649(rRNA methyltransferase activity);GO:0015030(Cajal body);GO:0031167(rRNA methylation);GO:0031428(box C/D snoRNP complex);GO:0032040(small-subunit processome);GO:1990258(histone glutamine methylation);GO:1990259(histone-glutamine me…	03008(Ribosome biogenesis in eukaryotes)	K14563	EC:2.1.1.-
0	ENSDARG00000041435	uba52	59.4479	47.9517	0.310044	0.997	0.994	1.39885e-20	3.87648e-16	ubiquitin A-52 residue ribosomal protein fusion product 1 [Source:ZFIN;Acc:ZDB-GENE-051023-7]	GO:0003735(structural constituent of ribosome);GO:0005515(protein binding);GO:0005634(nucleus);GO:0005737(cytoplasm);GO:0005840(ribosome);GO:0006412(translation);GO:0016567(protein ubiquitination);GO:0019941(modification-dependent protein catabolic process);GO:0022627(cytosolic small ribosomal subunit);GO:0031386(protein tag);GO:0031625(ubiquitin protein ligase binding)	03010(Ribosome)	K02927	NA
0	ENSDARG00000030602	rps19	57.1944	45.7315	0.322684	1	0.988	1.75894e-20	4.87438e-16	ribosomal protein S19 [Source:ZFIN;Acc:ZDB-GENE-040426-1716]	GO:0000028(ribosomal small subunit assembly);GO:0003735(structural constituent of ribosome);GO:0005622(intracellular);GO:0005840(ribosome);GO:0006412(translation);GO:0022627(cytosolic small ribosomal subunit);GO:0030218(erythrocyte differentiation);GO:0035284(brain segmentation);GO:0042541(hemoglobin biosynthetic process);GO:0043009(chordate embryonic development);GO:0045088(regulation of innate …	03010(Ribosome)	K02966	NA
0	ENSDARG00000019778	rps6	37.8787	30.3661	0.318924	0.983	0.973	2.40268e-20	6.6583e-16	ribosomal protein S6 [Source:ZFIN;Acc:ZDB-GENE-040801-8]	GO:0003735(structural constituent of ribosome);GO:0005622(intracellular);GO:0005840(ribosome);GO:0006412(translation)	03010(Ribosome);04150(mTOR signaling pathway);04371(Apelin signaling pathway);04910(Insulin signaling pathway)	K02991	NA
0	ENSDARG00000100588	rpl36	41.7537	32.125	0.378205	0.99	0.984	3.49836e-20	9.69464e-16	ribosomal protein L36 [Source:ZFIN;Acc:ZDB-GENE-040622-2]	GO:0002181(cytoplasmic translation);GO:0003735(structural constituent of ribosome);GO:0005622(intracellular);GO:0005737(cytoplasm);GO:0005829(cytosol);GO:0005840(ribosome);GO:0006412(translation);GO:0007420(brain development);GO:0022625(cytosolic large ribosomal subunit);GO:0051726(regulation of cell cycle)	03010(Ribosome)	K02920	NA
0	ENSDARG00000098293	si:dkey-27i16.2	19.059	15.6287	0.286273	0.932	0.719	9.43278e-20	2.61401e-15	si:dkey-27i16.2 [Source:ZFIN;Acc:ZDB-GENE-030131-9667]	GO:0051726(regulation of cell cycle)	NA	NA	NA
0	ENSDARG00000104243	eomesb	0.622513	0.413748	0.589352	0.143	0.016	2.60761e-19	7.22622e-15	eomesodermin homolog b [Source:ZFIN;Acc:ZDB-GENE-070318-1]	GO:0003677(DNA binding);GO:0003700(DNA-binding transcription factor activity);GO:0005634(nucleus);GO:0006355(regulation of transcription, DNA-templated)	NA	NA	NA
0	ENSDARG00000045487	rps16	38.7004	31.0118	0.319532	0.99	0.979	5.33141e-19	1.47744e-14	ribosomal protein S16 [Source:ZFIN;Acc:ZDB-GENE-050506-107]	GO:0000462(maturation of SSU-rRNA from tricistronic rRNA transcript (SSU-rRNA, 5.8S rRNA, LSU-rRNA));GO:0003723(RNA binding);GO:0003735(structural constituent of ribosome);GO:0005840(ribosome);GO:0006412(translation);GO:0022627(cytosolic small ribosomal subunit)	03010(Ribosome)	K02960	NA
0	ENSDARG00000115271	RPL37A	49.8302	37.9706	0.39214	0.993	0.992	9.22618e-19	2.55676e-14	zgc:171772 [Source:ZFIN;Acc:ZDB-GENE-070928-31]	GO:0003735(structural constituent of ribosome);GO:0005622(intracellular);GO:0005840(ribosome);GO:0006412(translation)	03010(Ribosome)	K02921	NA
0	ENSDARG00000092074	hcst	2.14936	1.42899	0.58891	0.452	0.208	1.07972e-18	2.99213e-14	hematopoietic cell signal transducer [Source:ZFIN;Acc:ZDB-GENE-061130-1]	GO:0005102(signaling receptor binding);GO:0014068(positive regulation of phosphatidylinositol 3-kinase signaling);GO:0016020(membrane);GO:0016021(integral component of membrane);GO:0043548(phosphatidylinositol 3-kinase binding);GO:0050776(regulation of immune response)	NA	NA	NA
0	ENSDARG00000056720	utp3	1.47394	0.913831	0.689677	0.378	0.15	4.15577e-18	1.15165e-13	UTP3, small subunit (SSU) processome component, homolog (S. cerevisiae) [Source:ZFIN;Acc:ZDB-GENE-040912-163]	GO:0000462(maturation of SSU-rRNA from tricistronic rRNA transcript (SSU-rRNA, 5.8S rRNA, LSU-rRNA));GO:0003674(molecular_function);GO:0005730(nucleolus);GO:0032040(small-subunit processome)	NA	K14767	NA
0	ENSDARG00000053365	rpl31	54.2014	43.8191	0.306772	0.997	0.993	6.8028e-18	1.88519e-13	ribosomal protein L31 [Source:ZFIN;Acc:ZDB-GENE-060331-121]	GO:0002181(cytoplasmic translation);GO:0003735(structural constituent of ribosome);GO:0005622(intracellular);GO:0005840(ribosome);GO:0006412(translation);GO:0022625(cytosolic large ribosomal subunit)	03010(Ribosome)	K02910	NA
0	ENSDARG00000104227	nop10	2.53441	1.53575	0.722703	0.527	0.276	1.89169e-17	5.24226e-13	NOP10 ribonucleoprotein homolog (yeast) [Source:ZFIN;Acc:ZDB-GENE-041007-4]	GO:0001522(pseudouridine synthesis);GO:0005634(nucleus);GO:0005697(telomerase holoenzyme complex);GO:0005730(nucleolus);GO:0006364(rRNA processing);GO:0007004(telomere maintenance via telomerase);GO:0030515(snoRNA binding);GO:0031118(rRNA pseudouridine synthesis);GO:0031120(snRNA pseudouridine synthesis);GO:0031429(box H/ACA snoRNP complex);GO:0034513(box H/ACA snoRNA binding);GO:0042254(ribosome…	03008(Ribosome biogenesis in eukaryotes)	K11130	NA
0	ENSDARG00000075720	il2rb	2.84516	2.24183	0.343834	0.483	0.259	2.278e-17	6.31279e-13	interleukin 2 receptor, beta [Source:ZFIN;Acc:ZDB-GENE-080108-2]	GO:0004896(cytokine receptor activity);GO:0005515(protein binding);GO:0016020(membrane);GO:0016021(integral component of membrane);GO:0019221(cytokine-mediated signaling pathway)	04060(Cytokine-cytokine receptor interaction);04144(Endocytosis)	K05069	NA
0	ENSDARG00000006219	gnl3	1.50546	0.951734	0.661573	0.361	0.166	3.09283e-17	8.57084e-13	guanine nucleotide binding protein-like 3 (nucleolar) [Source:ZFIN;Acc:ZDB-GENE-030131-616]	GO:0005525(GTP binding)	03008(Ribosome biogenesis in eukaryotes)	K14538	NA
0	ENSDARG00000040439	rsl24d1	20.9933	15.8325	0.407037	0.98	0.927	4.51465e-17	1.2511e-12	ribosomal L24 domain containing 1 [Source:ZFIN;Acc:ZDB-GENE-040426-1925]	GO:0000027(ribosomal large subunit assembly);GO:0003723(RNA binding);GO:0003735(structural constituent of ribosome);GO:0005634(nucleus);GO:0005730(nucleolus);GO:0006412(translation);GO:0022625(cytosolic large ribosomal subunit);GO:0042254(ribosome biogenesis);GO:1902626(assembly of large subunit precursor of preribosome)	03010(Ribosome)	K02896	NA
0	ENSDARG00000014690	rps4x	43.6924	36.044	0.277624	0.986	0.983	5.04771e-17	1.39882e-12	ribosomal protein S4 X-linked [Source:ZFIN;Acc:ZDB-GENE-040927-19]	GO:0003723(RNA binding);GO:0003735(structural constituent of ribosome);GO:0005622(intracellular);GO:0005840(ribosome);GO:0006412(translation);GO:0007420(brain development);GO:0019843(rRNA binding);GO:0022627(cytosolic small ribosomal subunit);GO:0043009(chordate embryonic development)	03010(Ribosome)	K02987	NA
0	ENSDARG00000041619	rack1	36.1877	29.8725	0.27668	0.993	0.976	1.72687e-16	4.7855e-12	receptor for activated C kinase 1 [Source:ZFIN;Acc:ZDB-GENE-990415-89]	GO:0001525(angiogenesis);GO:0001934(positive regulation of protein phosphorylation);GO:0005080(protein kinase C binding);GO:0005515(protein binding);GO:0005634(nucleus);GO:0005737(cytoplasm);GO:0005829(cytosol);GO:0005840(ribosome);GO:0019899(enzyme binding);GO:0022627(cytosolic small ribosomal subunit);GO:0030178(negative regulation of Wnt signaling pathway);GO:0032880(regulation of protein loca…	NA	K14753	NA
0	ENSDARG00000022232	ppan	1.30732	0.833008	0.650208	0.34	0.145	1.86184e-16	5.15952e-12	peter pan homolog [Source:ZFIN;Acc:ZDB-GENE-030114-4]	GO:0000027(ribosomal large subunit assembly);GO:0030687(preribosome, large subunit precursor)	NA	K14859	NA
0	ENSDARG00000034897	rps10	56.1755	46.2465	0.280598	0.997	0.997	1.9461e-16	5.39302e-12	ribosomal protein S10 [Source:ZFIN;Acc:ZDB-GENE-040426-1481]	GO:0000028(ribosomal small subunit assembly);GO:0003735(structural constituent of ribosome);GO:0005840(ribosome);GO:0022627(cytosolic small ribosomal subunit)	03010(Ribosome)	K02947	NA
0	ENSDARG00000007743	il15l	5.34864	3.43428	0.639165	0.527	0.274	3.39799e-16	9.41651e-12	interleukin 15, like [Source:ZFIN;Acc:ZDB-GENE-041111-173]	GO:0005125(cytokine activity);GO:0005126(cytokine receptor binding);GO:0005576(extracellular region);GO:0005615(extracellular space);GO:0006955(immune response);GO:0010469(regulation of signaling receptor activity);GO:0016020(membrane);GO:0016021(integral component of membrane)	NA	NA	NA
0	ENSDARG00000010160	rps15a	49.0886	40.805	0.266642	0.997	0.985	8.10595e-16	2.24632e-11	ribosomal protein S15a [Source:ZFIN;Acc:ZDB-GENE-030131-8708]	GO:0003735(structural constituent of ribosome);GO:0005840(ribosome);GO:0006412(translation);GO:0007420(brain development);GO:0022627(cytosolic small ribosomal subunit);GO:0030218(erythrocyte differentiation);GO:0043009(chordate embryonic development);GO:0051726(regulation of cell cycle)	03010(Ribosome)	K02957	NA
0	ENSDARG00000035871	rpl30	45.6318	37.9488	0.265988	1	0.988	9.92285e-16	2.74982e-11	ribosomal protein L30 [Source:ZFIN;Acc:ZDB-GENE-030131-8657]	GO:0003723(RNA binding);GO:0003735(structural constituent of ribosome);GO:0005622(intracellular);GO:0005840(ribosome);GO:0006412(translation);GO:0022625(cytosolic large ribosomal subunit)	03010(Ribosome)	K02908	NA
0	ENSDARG00000029500	rpl34	41.2276	34.3525	0.263193	0.993	0.985	2.67581e-15	7.41519e-11	ribosomal protein L34 [Source:ZFIN;Acc:ZDB-GENE-040426-1033]	GO:0003735(structural constituent of ribosome);GO:0005622(intracellular);GO:0005737(cytoplasm);GO:0005783(endoplasmic reticulum);GO:0005829(cytosol);GO:0005840(ribosome);GO:0006412(translation)	03010(Ribosome)	K02915	NA
0	ENSDARG00000053058	rps11	48.2692	39.1855	0.300784	0.99	0.983	2.69145e-15	7.45854e-11	ribosomal protein S11 [Source:ZFIN;Acc:ZDB-GENE-040426-2701]	GO:0003735(structural constituent of ribosome);GO:0005622(intracellular);GO:0005840(ribosome);GO:0006412(translation);GO:0022627(cytosolic small ribosomal subunit)	03010(Ribosome)	K02949	NA
0	ENSDARG00000012820	nop56	5.32211	3.61405	0.558382	0.741	0.55	6.10869e-15	1.69284e-10	NOP56 ribonucleoprotein homolog [Source:ZFIN;Acc:ZDB-GENE-040109-1]	GO:0007507(heart development);GO:0030515(snoRNA binding);GO:0031428(box C/D snoRNP complex);GO:0032040(small-subunit processome)	03008(Ribosome biogenesis in eukaryotes)	K14564	NA
0	ENSDARG00000059075	nip7	0.929228	0.628245	0.564705	0.272	0.097	6.32665e-15	1.75324e-10	NIP7, nucleolar pre-rRNA processing protein [Source:ZFIN;Acc:ZDB-GENE-050522-256]	GO:0003723(RNA binding);GO:0005634(nucleus);GO:0005730(nucleolus);GO:0030687(preribosome, large subunit precursor);GO:0042254(ribosome biogenesis);GO:0042255(ribosome assembly);GO:0042273(ribosomal large subunit biogenesis)	NA	K07565	NA
0	ENSDARG00000024416	twistnb	1.98628	1.28656	0.62655	0.432	0.225	1.09913e-14	3.04591e-10	TWIST neighbor [Source:ZFIN;Acc:ZDB-GENE-041007-3]	GO:0003899(DNA-directed 5'-3' RNA polymerase activity);GO:0006351(transcription, DNA-templated)	03020(RNA polymerase)	K03004	NA
0	ENSDARG00000104708	ddx24	1.22695	0.875136	0.487499	0.327	0.16	6.48175e-14	1.79622e-09	DEAD (Asp-Glu-Ala-Asp) box helicase 24 [Source:ZFIN;Acc:ZDB-GENE-100716-4]	GO:0000166(nucleotide binding);GO:0003676(nucleic acid binding);GO:0004386(helicase activity);GO:0005524(ATP binding);GO:0016787(hydrolase activity)	NA	K14805	EC:3.6.4.13
0	ENSDARG00000002353	tagapa	26.1958	19.1197	0.454274	0.867	0.757	9.95802e-14	2.75957e-09	T cell activation RhoGTPase activating protein a [Source:ZFIN;Acc:ZDB-GENE-040426-1877]	GO:0005096(GTPase activator activity);GO:0007165(signal transduction);GO:0043547(positive regulation of GTPase activity)	NA	NA	NA
0	ENSDARG00000018961	gtpbp4	5.57967	4.072	0.454443	0.793	0.594	1.83258e-13	5.07843e-09	GTP binding protein 4 [Source:ZFIN;Acc:ZDB-GENE-030131-5982]	GO:0005525(GTP binding);GO:0005634(nucleus);GO:0005730(nucleolus);GO:0042254(ribosome biogenesis)	03008(Ribosome biogenesis in eukaryotes)	K06943	NA
0	ENSDARG00000043304	nop2	2.18206	1.31969	0.725492	0.412	0.242	2.29958e-13	6.37258e-09	NOP2 nucleolar protein homolog (yeast) [Source:ZFIN;Acc:ZDB-GENE-050309-7]	GO:0003723(RNA binding);GO:0005730(nucleolus);GO:0006364(rRNA processing);GO:0008168(methyltransferase activity);GO:0008757(S-adenosylmethionine-dependent methyltransferase activity);GO:0009383(rRNA (cytosine-C5-)-methyltransferase activity);GO:0016740(transferase activity);GO:0032259(methylation);GO:0070475(rRNA base methylation)	NA	K14835	EC:2.1.1.310
0	ENSDARG00000030949	srprb	1.63839	1.12285	0.545112	0.425	0.247	2.81032e-13	7.78795e-09	SRP receptor subunit beta [Source:ZFIN;Acc:ZDB-GENE-040718-311]	GO:0005525(GTP binding);GO:0016020(membrane);GO:0016021(integral component of membrane)	03060(Protein export)	K12272	NA
0	ENSDARG00000056167	hspe1	1.60057	1.0628	0.590719	0.384	0.204	2.88106e-13	7.98398e-09	heat shock 10 protein 1 [Source:ZFIN;Acc:ZDB-GENE-000906-2]	GO:0005737(cytoplasm);GO:0005759(mitochondrial matrix);GO:0006457(protein folding);GO:0046872(metal ion binding);GO:0051082(unfolded protein binding);GO:0051085(chaperone cofactor-dependent protein refolding);GO:0051087(chaperone binding)	NA	K04078	NA
0	ENSDARG00000036316	rpl39	57.7135	47.62	0.277342	1	0.988	3.01037e-13	8.34235e-09	ribosomal protein L39 [Source:ZFIN;Acc:ZDB-GENE-040625-51]	GO:0003735(structural constituent of ribosome);GO:0005622(intracellular);GO:0005840(ribosome);GO:0006412(translation);GO:0022625(cytosolic large ribosomal subunit)	03010(Ribosome)	K02924	NA
0	ENSDARG00000088030	rpl35a	45.9964	37.558	0.292398	0.993	0.985	4.42981e-13	1.22759e-08	ribosomal protein L35a [Source:ZFIN;Acc:ZDB-GENE-040718-190]	GO:0002181(cytoplasmic translation);GO:0003735(structural constituent of ribosome);GO:0005622(intracellular);GO:0005840(ribosome);GO:0006412(translation);GO:0022625(cytosolic large ribosomal subunit);GO:0030218(erythrocyte differentiation);GO:0042273(ribosomal large subunit biogenesis);GO:0043009(chordate embryonic development)	03010(Ribosome)	K02917	NA
0	ENSDARG00000102912	gpr184	2.27226	1.59131	0.513911	0.422	0.211	6.28041e-13	1.74043e-08	G protein-coupled receptor 184 [Source:ZFIN;Acc:ZDB-GENE-060929-1218]	GO:0004930(G protein-coupled receptor activity);GO:0005887(integral component of plasma membrane);GO:0007165(signal transduction);GO:0007186(G protein-coupled receptor signaling pathway);GO:0016020(membrane);GO:0016021(integral component of membrane);GO:0035025(positive regulation of Rho protein signal transduction);GO:0051482(positive regulation of cytosolic calcium ion concentration involved in…	NA	NA	NA
0	ENSDARG00000012495	mphosph10	0.981553	0.656167	0.581002	0.248	0.094	3.20769e-12	8.88916e-08	M-phase phosphoprotein 10 (U3 small nucleolar ribonucleoprotein) [Source:ZFIN;Acc:ZDB-GENE-030131-2146]	GO:0005634(nucleus);GO:0005730(nucleolus);GO:0005732(small nucleolar ribonucleoprotein complex);GO:0006364(rRNA processing);GO:0032040(small-subunit processome);GO:0034457(Mpp10 complex);GO:0042254(ribosome biogenesis)	03008(Ribosome biogenesis in eukaryotes)	K14559	NA
0	ENSDARG00000098507	lyar	0.694982	0.505177	0.460187	0.211	0.072	4.41354e-12	1.22308e-07	Ly1 antibody reactive homolog (mouse) [Source:ZFIN;Acc:ZDB-GENE-040426-1414]	GO:0003677(DNA binding);GO:0005575(cellular_component)	NA	K15263	NA
0	ENSDARG00000062621	satb1b	0.539006	0.426874	0.336493	0.146	0.045	1.09457e-11	3.03326e-07	SATB homeobox 1b [Source:ZFIN;Acc:ZDB-GENE-030131-7105]	GO:0003677(DNA binding);GO:0006338(chromatin remodeling);GO:0030099(myeloid cell differentiation);GO:0030223(neutrophil differentiation)	NA	K23225	NA
0	ENSDARG00000060498	tnfrsf9a	32.536	25.001	0.380052	0.81	0.63	1.13388e-11	3.14221e-07	tumor necrosis factor receptor superfamily, member 9a [Source:ZFIN;Acc:ZDB-GENE-060421-8213]	GO:0005515(protein binding);GO:0016020(membrane);GO:0016021(integral component of membrane)	04060(Cytokine-cytokine receptor interaction)	K05146	NA
0	ENSDARG00000023472	ctnnb2	3.94357	3.03398	0.37829	0.646	0.444	1.15871e-11	3.21102e-07	catenin, beta 2 [Source:ZFIN;Acc:ZDB-GENE-040426-2575]	GO:0003713(transcription coactivator activity);GO:0005515(protein binding);GO:0005634(nucleus);GO:0005913(cell-cell adherens junction);GO:0007155(cell adhesion);GO:0009950(dorsal/ventral axis specification);GO:0009953(dorsal/ventral pattern formation);GO:0016342(catenin complex);GO:0019903(protein phosphatase binding);GO:0035257(nuclear hormone receptor binding);GO:0045294(alpha-catenin binding);…	NA	NA	NA
0	ENSDARG00000020232	eif6	2.33762	1.76444	0.405825	0.517	0.358	1.38344e-11	3.83378e-07	eukaryotic translation initiation factor 6 [Source:ZFIN;Acc:ZDB-GENE-031118-110]	GO:0000054(ribosomal subunit export from nucleus);GO:0003743(translation initiation factor activity);GO:0005634(nucleus);GO:0005730(nucleolus);GO:0005737(cytoplasm);GO:0005829(cytosol);GO:0006412(translation);GO:0006413(translational initiation);GO:0030687(preribosome, large subunit precursor);GO:0042254(ribosome biogenesis);GO:0042256(mature ribosome assembly);GO:0042273(ribosomal large subunit …	03008(Ribosome biogenesis in eukaryotes)	K03264	NA
0	ENSDARG00000006413	rpl38	38.5188	31.9071	0.271688	0.99	0.982	1.56035e-11	4.32404e-07	ribosomal protein L38 [Source:ZFIN;Acc:ZDB-GENE-030131-8752]	GO:0003735(structural constituent of ribosome);GO:0005622(intracellular);GO:0005840(ribosome);GO:0006412(translation);GO:0022625(cytosolic large ribosomal subunit);GO:0043009(chordate embryonic development)	03010(Ribosome)	K02923	NA
0	ENSDARG00000035133	pho	5.17635	3.24706	0.672802	0.571	0.384	1.61461e-11	4.47442e-07	phoenix [Source:ZFIN;Acc:ZDB-GENE-030131-5935]	GO:0070658(neuromast hair cell differentiation involved in neuromast regeneration)	NA	NA	NA
0	ENSDARG00000035860	rps28	40.4463	33.2614	0.28216	0.997	0.988	2.31828e-11	6.4244e-07	ribosomal protein S28 [Source:ZFIN;Acc:ZDB-GENE-030131-2022]	GO:0000028(ribosomal small subunit assembly);GO:0002181(cytoplasmic translation);GO:0003735(structural constituent of ribosome);GO:0005622(intracellular);GO:0005737(cytoplasm);GO:0005783(endoplasmic reticulum);GO:0005791(rough endoplasmic reticulum);GO:0005829(cytosol);GO:0005840(ribosome);GO:0006412(translation);GO:0022627(cytosolic small ribosomal subunit);GO:0030490(maturation of SSU-rRNA);GO:…	03010(Ribosome)	K02979	NA
0	ENSDARG00000091831	ddx27	1.10594	0.770826	0.520802	0.293	0.143	2.7316e-11	7.5698e-07	DEAD (Asp-Glu-Ala-Asp) box polypeptide 27 [Source:ZFIN;Acc:ZDB-GENE-031001-8]	GO:0000166(nucleotide binding);GO:0003676(nucleic acid binding);GO:0004386(helicase activity);GO:0005524(ATP binding);GO:0016787(hydrolase activity)	NA	K13181	EC:3.6.4.13
0	ENSDARG00000042864	rpl7l1	1.89776	1.42377	0.414577	0.48	0.287	5.88706e-11	1.63142e-06	ribosomal protein L7-like 1 [Source:ZFIN;Acc:ZDB-GENE-030131-970]	GO:0000463(maturation of LSU-rRNA from tricistronic rRNA transcript (SSU-rRNA, 5.8S rRNA, LSU-rRNA));GO:0003735(structural constituent of ribosome);GO:0005840(ribosome);GO:0022625(cytosolic large ribosomal subunit)	NA	NA	NA
0	ENSDARG00000059908	si:ch211-217k17.7	2.08077	1.42149	0.549713	0.459	0.293	6.48294e-11	1.79655e-06	si:ch211-217k17.7 [Source:ZFIN;Acc:ZDB-GENE-061009-11]	NA	NA	K14822	NA
0	ENSDARG00000002663	optn	4.57244	3.48433	0.392084	0.701	0.516	7.2009e-11	1.99551e-06	optineurin [Source:ZFIN;Acc:ZDB-GENE-030131-8103]	GO:0005794(Golgi apparatus);GO:0006914(autophagy);GO:0016192(vesicle-mediated transport);GO:0031410(cytoplasmic vesicle);GO:0070530(K63-linked polyubiquitin modification-dependent protein binding)	04137(Mitophagy - animal)	K19946	NA
0	ENSDARG00000030789	ddx18	1.45497	0.960463	0.599188	0.347	0.176	1.0842e-10	3.00455e-06	DEAD (Asp-Glu-Ala-Asp) box polypeptide 18 [Source:ZFIN;Acc:ZDB-GENE-030131-9685]	GO:0000166(nucleotide binding);GO:0003676(nucleic acid binding);GO:0003723(RNA binding);GO:0004386(helicase activity);GO:0005524(ATP binding);GO:0016787(hydrolase activity);GO:0030097(hemopoiesis);GO:0030099(myeloid cell differentiation)	NA	K13179	EC:3.6.4.13
0	ENSDARG00000010244	rpl22l1	11.6938	8.51396	0.457836	0.867	0.735	1.18629e-10	3.28744e-06	ribosomal protein L22-like 1 [Source:ZFIN;Acc:ZDB-GENE-060804-3]	GO:0003723(RNA binding);GO:0003735(structural constituent of ribosome);GO:0005622(intracellular);GO:0005840(ribosome);GO:0006412(translation);GO:0022625(cytosolic large ribosomal subunit);GO:0060216(definitive hemopoiesis)	03010(Ribosome)	K02891	NA
0	ENSDARG00000092780	si:ch1073-170o4.1	0.886113	0.617671	0.520653	0.252	0.101	1.31118e-10	3.63355e-06	si:ch1073-170o4.1 [Source:ZFIN;Acc:ZDB-GENE-030131-7012]	NA	NA	NA	NA
0	ENSDARG00000039887	c1qbp	1.77875	1.23031	0.531837	0.401	0.244	2.42062e-10	6.70803e-06	complement component 1, q subcomponent binding protein [Source:ZFIN;Acc:ZDB-GENE-050417-408]	GO:0003674(molecular_function);GO:0003729(mRNA binding);GO:0005739(mitochondrion);GO:0005759(mitochondrial matrix);GO:0008150(biological_process);GO:0008494(translation activator activity);GO:0070131(positive regulation of mitochondrial translation);GO:0097177(mitochondrial ribosome binding)	NA	K15414	NA
0	ENSDARG00000024211	ifng1	1.58511	1.18834	0.415631	0.282	0.132	2.62159e-10	7.26495e-06	interferon gamma 1 [Source:ZFIN;Acc:ZDB-GENE-040629-1]	GO:0005133(interferon-gamma receptor binding);GO:0005576(extracellular region);GO:0006955(immune response);GO:0009615(response to virus);GO:0030097(hemopoiesis);GO:0042742(defense response to bacterium);GO:0098508(endothelial to hematopoietic transition)	03050(Proteasome);04060(Cytokine-cytokine receptor interaction);04217(Necroptosis);04350(TGF-beta signaling pathway);05132(Salmonella infection);05168(Herpes simplex virus 1 infection)	K04687	NA
0	ENSDARG00000087779	pum3	0.689113	0.523656	0.396121	0.224	0.089	2.63724e-10	7.30831e-06	pumilio RNA-binding family member 3 [Source:ZFIN;Acc:ZDB-GENE-030131-9808]	GO:0003677(DNA binding);GO:0003723(RNA binding);GO:0005634(nucleus);GO:0005654(nucleoplasm);GO:0005694(chromosome);GO:0005730(nucleolus);GO:0008354(germ cell migration)	NA	K14844	NA
0	ENSDARG00000000460	nitr2b	0.731746	0.57266	0.353663	0.122	0.035	4.52789e-10	1.25477e-05	novel immune-type receptor 2b [Source:ZFIN;Acc:ZDB-GENE-001106-6]	GO:0016020(membrane);GO:0016021(integral component of membrane)	NA	NA	NA
0	ENSDARG00000053459	rybpb	1.32403	1.01095	0.389226	0.323	0.17	5.85276e-10	1.62192e-05	RING1 and YY1 binding protein b [Source:ZFIN;Acc:ZDB-GENE-061103-96]	GO:0045893(positive regulation of transcription, DNA-templated);GO:0046872(metal ion binding)	NA	K11469	NA
0	ENSDARG00000008480	trmt61a	0.896763	0.673309	0.413459	0.259	0.123	1.49871e-09	4.15324e-05	tRNA methyltransferase 61A [Source:ZFIN;Acc:ZDB-GENE-040718-5]	GO:0005634(nucleus);GO:0008033(tRNA processing);GO:0008168(methyltransferase activity);GO:0016429(tRNA (adenine-N1-)-methyltransferase activity);GO:0016740(transferase activity);GO:0030488(tRNA methylation);GO:0031515(tRNA (m1A) methyltransferase complex);GO:0032259(methylation)	NA	K07442	2.1.1.220;EC:2.1.1.219
0	ENSDARG00000077721	knop1	0.777661	0.516191	0.591236	0.16	0.062	1.75936e-09	4.87553e-05	lysine-rich nucleolar protein 1 [Source:ZFIN;Acc:ZDB-GENE-090313-76]	NA	NA	NA	NA
0	ENSDARG00000003920	setb	4.13244	3.05378	0.436399	0.687	0.532	1.94573e-09	5.39201e-05	SET nuclear proto-oncogene b [Source:ZFIN;Acc:ZDB-GENE-030131-433]	GO:0005634(nucleus);GO:0006334(nucleosome assembly);GO:0048884(neuromast development)	NA	K11290	NA
0	ENSDARG00000008502	pno1	2.63832	1.95955	0.429095	0.565	0.406	1.98243e-09	5.49372e-05	partner of NOB1 homolog [Source:ZFIN;Acc:ZDB-GENE-040426-1419]	GO:0003676(nucleic acid binding);GO:0003723(RNA binding)	NA	K11884	NA
0	ENSDARG00000010246	prmt1	2.80897	2.07406	0.437585	0.534	0.395	2.39915e-09	6.64851e-05	protein arginine methyltransferase 1 [Source:ZFIN;Acc:ZDB-GENE-030131-693]	GO:0005634(nucleus);GO:0005829(cytosol);GO:0006355(regulation of transcription, DNA-templated);GO:0006479(protein methylation);GO:0008168(methyltransferase activity);GO:0008469(histone-arginine N-methyltransferase activity);GO:0008757(S-adenosylmethionine-dependent methyltransferase activity);GO:0016273(arginine N-methyltransferase activity);GO:0016740(transferase activity);GO:0019919(peptidyl-ar…	04068(FoxO signaling pathway)	K11434	EC:2.1.1.319
0	ENSDARG00000003527	mak16	1.22425	0.888412	0.462596	0.323	0.167	2.47431e-09	6.85681e-05	MAK16 homolog (S. cerevisiae) [Source:ZFIN;Acc:ZDB-GENE-020419-35]	GO:0005634(nucleus);GO:0005730(nucleolus)	NA	K14831	NA
0	ENSDARG00000054980	ebna1bp2	0.720047	0.55502	0.375552	0.248	0.118	3.04091e-09	8.42698e-05	EBNA1 binding protein 2 [Source:ZFIN;Acc:ZDB-GENE-030131-6989]	GO:0003674(molecular_function);GO:0005730(nucleolus);GO:0006364(rRNA processing);GO:0030687(preribosome, large subunit precursor);GO:0034399(nuclear periphery);GO:0042273(ribosomal large subunit biogenesis)	NA	K14823	NA
0	ENSDARG00000035264	riok2	0.600083	0.468092	0.35837	0.184	0.084	3.89134e-09	0.000107837	RIO kinase 2 (yeast) [Source:ZFIN;Acc:ZDB-GENE-040426-2913]	GO:0004672(protein kinase activity);GO:0004674(protein serine/threonine kinase activity);GO:0005524(ATP binding);GO:0005575(cellular_component);GO:0005634(nucleus);GO:0005829(cytosol);GO:0006468(protein phosphorylation);GO:0030490(maturation of SSU-rRNA);GO:0030688(preribosome, small subunit precursor)	03008(Ribosome biogenesis in eukaryotes)	K07179	EC:2.7.11.1
0	ENSDARG00000077473	mych	3.08089	2.32462	0.406347	0.493	0.322	4.23533e-09	0.000117369	myelocytomatosis oncogene homolog [Source:ZFIN;Acc:ZDB-GENE-030219-51]	GO:0003677(DNA binding);GO:0003700(DNA-binding transcription factor activity);GO:0005634(nucleus);GO:0006355(regulation of transcription, DNA-templated);GO:0014032(neural crest cell development);GO:0046983(protein dimerization activity)	NA	NA	NA
0	ENSDARG00000022399	ntmt1	0.751245	0.582166	0.367854	0.211	0.11	5.51485e-09	0.000152828	N-terminal Xaa-Pro-Lys N-methyltransferase 1 [Source:ZFIN;Acc:ZDB-GENE-040426-2055]	GO:0006480(N-terminal protein amino acid methylation);GO:0008168(methyltransferase activity)	NA	K16219	EC:2.1.1.244
0	ENSDARG00000007241	mycb	2.92287	1.89241	0.627165	0.435	0.259	5.87297e-09	0.000162752	MYC proto-oncogene, bHLH transcription factor b [Source:ZFIN;Acc:ZDB-GENE-040426-780]	GO:0000981(DNA-binding transcription factor activity, RNA polymerase II-specific);GO:0002244(hematopoietic progenitor cell differentiation);GO:0003677(DNA binding);GO:0003700(DNA-binding transcription factor activity);GO:0005634(nucleus);GO:0006355(regulation of transcription, DNA-templated);GO:0006357(regulation of transcription by RNA polymerase II);GO:0046983(protein dimerization activity);GO:…	04010(MAPK signaling pathway);04012(ErbB signaling pathway);04110(Cell cycle);04218(Cellular senescence);04310(Wnt signaling pathway);04350(TGF-beta signaling pathway)	K04377	NA
0	ENSDARG00000074242	serbp1a	18.4047	15.2688	0.269481	0.986	0.933	6.88455e-09	0.000190785	SERPINE1 mRNA binding protein 1a [Source:ZFIN;Acc:ZDB-GENE-030131-7389]	GO:0003723(RNA binding);GO:0003730(mRNA 3'-UTR binding);GO:0005575(cellular_component);GO:0008150(biological_process)	NA	K13199	NA
0	ENSDARG00000102822	pam16	1.11894	0.86879	0.365055	0.323	0.176	7.34771e-09	0.00020362	presequence translocase associated motor 16 [Source:ZFIN;Acc:ZDB-GENE-040426-1776]	GO:0005744(TIM23 mitochondrial import inner membrane translocase complex);GO:0030150(protein import into mitochondrial matrix)	NA	K17805	NA
0	ENSDARG00000069422	nhp2	0.9379	0.697057	0.428157	0.272	0.131	8.12852e-09	0.000225258	NHP2 ribonucleoprotein homolog (yeast) [Source:ZFIN;Acc:ZDB-GENE-030131-533]	GO:0000469(cleavage involved in rRNA processing);GO:0000470(maturation of LSU-rRNA);GO:0003723(RNA binding);GO:0005634(nucleus);GO:0005697(telomerase holoenzyme complex);GO:0005730(nucleolus);GO:0005732(small nucleolar ribonucleoprotein complex);GO:0006364(rRNA processing);GO:0007004(telomere maintenance via telomerase);GO:0031118(rRNA pseudouridine synthesis);GO:0031120(snRNA pseudouridine synth…	03008(Ribosome biogenesis in eukaryotes)	K11129	NA
0	ENSDARG00000056160	hspd1	1.80027	1.25889	0.516058	0.405	0.235	8.77331e-09	0.000243126	heat shock 60 protein 1 [Source:ZFIN;Acc:ZDB-GENE-021206-1]	GO:0005524(ATP binding);GO:0005737(cytoplasm);GO:0005739(mitochondrion);GO:0005759(mitochondrial matrix);GO:0005829(cytosol);GO:0006457(protein folding);GO:0006458('de novo' protein folding);GO:0007005(mitochondrion organization);GO:0008637(apoptotic mitochondrial changes);GO:0031101(fin regeneration);GO:0042026(protein refolding);GO:0042246(tissue regeneration);GO:0045041(protein import into mit…	03018(RNA degradation)	K04077	NA
0	ENSDARG00000055955	lcp2a	3.17211	2.38429	0.411881	0.561	0.376	9.77306e-09	0.000270831	lymphocyte cytosolic protein 2a [Source:ZFIN;Acc:ZDB-GENE-041114-97]	GO:0005515(protein binding);GO:0007169(transmembrane receptor protein tyrosine kinase signaling pathway);GO:0035556(intracellular signal transduction)	NA	NA	NA
0	ENSDARG00000042940	nab1a	5.89453	3.955	0.575699	0.565	0.393	1.1317e-08	0.000313616	NGFI-A binding protein 1a (EGR1 binding protein 1) [Source:ZFIN;Acc:ZDB-GENE-050208-574]	GO:0005634(nucleus);GO:0006355(regulation of transcription, DNA-templated);GO:0045892(negative regulation of transcription, DNA-templated);GO:0140110(transcription regulator activity)	NA	K22388	NA
0	ENSDARG00000012274	eif4e1c	1.0846	0.821812	0.40028	0.306	0.175	1.63704e-08	0.000453656	eukaryotic translation initiation factor 4E family member 1c [Source:ZFIN;Acc:ZDB-GENE-050417-398]	GO:0000340(RNA 7-methylguanosine cap binding);GO:0003723(RNA binding);GO:0003743(translation initiation factor activity);GO:0005737(cytoplasm);GO:0006412(translation);GO:0006413(translational initiation);GO:0016281(eukaryotic translation initiation factor 4F complex)	03013(RNA transport);04150(mTOR signaling pathway);04910(Insulin signaling pathway)	K03259	NA
0	ENSDARG00000099745	baz1a.1	2.43662	1.74333	0.483035	0.483	0.355	2.07383e-08	0.000574701	bromodomain adjacent to zinc finger domain, 1A [Source:ZFIN;Acc:ZDB-GENE-030131-6105]	GO:0005634(nucleus);GO:0008150(biological_process);GO:0046872(metal ion binding)	NA	K11655	NA
0	ENSDARG00000040666	nifk	1.06923	0.757927	0.496441	0.282	0.147	2.32905e-08	0.000645426	nucleolar protein interacting with the FHA domain of MKI67 [Source:ZFIN;Acc:ZDB-GENE-021231-4]	GO:0003676(nucleic acid binding);GO:0003723(RNA binding);GO:0005634(nucleus);GO:0005730(nucleolus);GO:0007275(multicellular organism development)	NA	K14838	NA
0	ENSDARG00000100968	si:ch211-1a19.3	1.66412	1.22368	0.443535	0.361	0.198	2.52043e-08	0.000698461	si:ch211-1a19.3 [Source:ZFIN;Acc:ZDB-GENE-141216-322]	GO:0016020(membrane);GO:0016021(integral component of membrane)	NA	NA	NA
0	ENSDARG00000079333	cd40lg	0.908676	0.647622	0.488615	0.207	0.084	3.03595e-08	0.000841323	CD40 ligand [Source:ZFIN;Acc:ZDB-GENE-100727-1]	GO:0002639(positive regulation of immunoglobulin production);GO:0005125(cytokine activity);GO:0005164(tumor necrosis factor receptor binding);GO:0005515(protein binding);GO:0005615(extracellular space);GO:0006955(immune response);GO:0009897(external side of plasma membrane);GO:0010469(regulation of signaling receptor activity);GO:0016020(membrane);GO:0016021(integral component of membrane)	04060(Cytokine-cytokine receptor interaction);04514(Cell adhesion molecules (CAMs));04672(Intestinal immune network for IgA production)	K03161	NA
0	ENSDARG00000055868	rsl1d1	3.27479	2.51459	0.381081	0.619	0.436	4.1427e-08	0.00114803	ribosomal L1 domain containing 1 [Source:ZFIN;Acc:ZDB-GENE-130603-67]	GO:0000470(maturation of LSU-rRNA);GO:0003723(RNA binding);GO:0030686(90S preribosome)	NA	K14775	NA
0	ENSDARG00000055360	llph	0.688832	0.532508	0.371347	0.204	0.09	4.83745e-08	0.00134056	LLP homolog, long-term synaptic facilitation factor [Source:ZFIN;Acc:ZDB-GENE-051030-30]	GO:0001099(basal RNA polymerase II transcription machinery binding);GO:0005634(nucleus);GO:0005694(chromosome);GO:0005730(nucleolus);GO:0060999(positive regulation of dendritic spine development);GO:0097484(dendrite extension)	NA	NA	NA
0	ENSDARG00000077264	wdr43	1.44797	1.09195	0.407133	0.374	0.232	6.19614e-08	0.00171708	WD repeat domain 43 [Source:ZFIN;Acc:ZDB-GENE-021231-3]	GO:0001525(angiogenesis);GO:0001570(vasculogenesis);GO:0005515(protein binding);GO:0042254(ribosome biogenesis);GO:0048703(embryonic viscerocranium morphogenesis);GO:0060218(hematopoietic stem cell differentiation)	03008(Ribosome biogenesis in eukaryotes)	K14546	NA
0	ENSDARG00000102291	eef1da	9.49734	7.43057	0.354051	0.881	0.769	7.06886e-08	0.00195892	eukaryotic translation elongation factor 1 delta a (guanine nucleotide exchange protein) [Source:ZFIN;Acc:ZDB-GENE-040426-2740]	GO:0003746(translation elongation factor activity);GO:0005853(eukaryotic translation elongation factor 1 complex);GO:0006412(translation);GO:0006414(translational elongation)	NA	K15410	NA
0	ENSDARG00000097993	si:ch211-191c10.1	3.63724	2.64588	0.459099	0.544	0.376	7.6657e-08	0.00212432	si:ch211-191c10.1 [Source:ZFIN;Acc:ZDB-GENE-131127-387]	GO:0005509(calcium ion binding)	NA	NA	NA
0	ENSDARG00000063626	ddx21	3.35196	2.65817	0.334569	0.646	0.496	7.83414e-08	0.002171	DEAD (Asp-Glu-Ala-Asp) box helicase 21 [Source:ZFIN;Acc:ZDB-GENE-031113-10]	GO:0003676(nucleic acid binding);GO:0003723(RNA binding);GO:0004386(helicase activity);GO:0005524(ATP binding);GO:0005634(nucleus)	NA	K16911	EC:3.6.4.13
0	ENSDARG00000038068	ddx5	15.3291	12.5203	0.292004	0.98	0.924	1.07917e-07	0.0029906	DEAD (Asp-Glu-Ala-Asp) box helicase 5 [Source:ZFIN;Acc:ZDB-GENE-030131-925]	GO:0000166(nucleotide binding);GO:0003676(nucleic acid binding);GO:0004386(helicase activity);GO:0005524(ATP binding);GO:0016020(membrane);GO:0016021(integral component of membrane);GO:0016787(hydrolase activity)	03040(Spliceosome)	K12823	EC:3.6.4.13
0	ENSDARG00000038672	tcf7	0.46581	0.373597	0.31826	0.133	0.043	1.25582e-07	0.00348012	transcription factor 7 [Source:ZFIN;Acc:ZDB-GENE-050222-4]	GO:0000978(RNA polymerase II proximal promoter sequence-specific DNA binding);GO:0000981(DNA-binding transcription factor activity, RNA polymerase II-specific);GO:0003677(DNA binding);GO:0003700(DNA-binding transcription factor activity);GO:0005634(nucleus);GO:0005667(transcription factor complex);GO:0006355(regulation of transcription, DNA-templated);GO:0006357(regulation of transcription by RNA…	04310(Wnt signaling pathway);04520(Adherens junction);04916(Melanogenesis)	K02620	NA
0	ENSDARG00000103163	tomm20a	1.48874	1.13254	0.394526	0.364	0.232	1.57306e-07	0.00435925	translocase of outer mitochondrial membrane 20 [Source:ZFIN;Acc:ZDB-GENE-040426-1976]	GO:0005634(nucleus);GO:0005739(mitochondrion);GO:0005741(mitochondrial outer membrane);GO:0005742(mitochondrial outer membrane translocase complex);GO:0006357(regulation of transcription by RNA polymerase II);GO:0006605(protein targeting);GO:0006886(intracellular protein transport);GO:0016020(membrane);GO:0016021(integral component of membrane);GO:0044212(transcription regulatory region DNA bindi…	NA	K17770	NA
0	ENSDARG00000090386	cd3eap	0.847094	0.633021	0.420269	0.231	0.118	1.99867e-07	0.00553871	CD3e molecule, epsilon associated protein [Source:ZFIN;Acc:ZDB-GENE-101202-2]	GO:0006360(transcription by RNA polymerase I)	NA	NA	NA
0	ENSDARG00000074501	tnip2	2.49713	1.94	0.364214	0.503	0.334	3.37528e-07	0.00935358	TNFAIP3 interacting protein 2 [Source:ZFIN;Acc:ZDB-GENE-120913-2]	GO:0070530(K63-linked polyubiquitin modification-dependent protein binding)	NA	NA	NA
0	ENSDARG00000018971	b3gnt5a	2.8489	2.04753	0.47652	0.371	0.214	3.61725e-07	0.0100241	UDP-GlcNAc:betaGal beta-1,3-N-acetylglucosaminyltransferase 5a [Source:ZFIN;Acc:ZDB-GENE-030131-8470]	GO:0000139(Golgi membrane);GO:0005783(endoplasmic reticulum);GO:0005794(Golgi apparatus);GO:0006486(protein glycosylation);GO:0008376(acetylgalactosaminyltransferase activity);GO:0008378(galactosyltransferase activity);GO:0008532(N-acetyllactosaminide beta-1,3-N-acetylglucosaminyltransferase activity);GO:0016020(membrane);GO:0016021(integral component of membrane);GO:0016740(transferase activity)…	00601(Glycosphingolipid biosynthesis - lacto and neolacto series)	K03766	EC:2.4.1.206
0	ENSDARG00000099091	CU929418.1	2.59813	2.01879	0.363982	0.503	0.371	3.69297e-07	0.010234	NA	NA	NA	NA	NA
0	ENSDARG00000081270	rn7sk	6.59855	4.41767	0.578865	0.629	0.513	3.92701e-07	0.0108825	RNA, 7SK small nuclear [Source:ZFIN;Acc:ZDB-GENE-090323-1]	NA	NA	NA	NA
0	ENSDARG00000007108	lipia	0.975447	0.78331	0.316481	0.221	0.114	4.07963e-07	0.0113055	lipase, member Ia [Source:ZFIN;Acc:ZDB-GENE-040801-242]	GO:0005576(extracellular region);GO:0006629(lipid metabolic process);GO:0016020(membrane);GO:0016042(lipid catabolic process);GO:0016787(hydrolase activity);GO:0052689(carboxylic ester hydrolase activity)	NA	K19404	EC:3.1.1.-
0	ENSDARG00000004948	bccip	1.51907	1.12728	0.430339	0.381	0.252	5.9064e-07	0.0163678	BRCA2 and CDKN1A interacting protein [Source:ZFIN;Acc:ZDB-GENE-050320-39]	NA	NA	K15262	NA
0	ENSDARG00000024561	nolc1	0.957514	0.729053	0.39327	0.269	0.146	7.45283e-07	0.0206533	nucleolar and coiled-body phosphoprotein 1 [Source:ZFIN;Acc:ZDB-GENE-030131-6349]	GO:0005654(nucleoplasm);GO:0005730(nucleolus);GO:0048701(embryonic cranial skeleton morphogenesis)	NA	NA	NA
0	ENSDARG00000042972	zgc:136605	1.10772	0.841435	0.396676	0.224	0.107	8.47122e-07	0.0234754	zgc:136605 [Source:ZFIN;Acc:ZDB-GENE-060312-11]	GO:0003674(molecular_function);GO:0008150(biological_process);GO:0016020(membrane);GO:0016021(integral component of membrane)	NA	NA	NA
0	ENSDARG00000006074	uck2a	1.05753	0.8042	0.395076	0.293	0.161	9.41622e-07	0.0260942	uridine-cytidine kinase 2a [Source:ZFIN;Acc:ZDB-GENE-030131-7158]	GO:0000166(nucleotide binding);GO:0004849(uridine kinase activity);GO:0005524(ATP binding);GO:0005829(cytosol);GO:0006238(CMP salvage);GO:0016301(kinase activity);GO:0016310(phosphorylation);GO:0016740(transferase activity);GO:0019206(nucleoside kinase activity);GO:0044206(UMP salvage);GO:0044211(CTP salvage)	00240(Pyrimidine metabolism);00983(Drug metabolism - other enzymes)	K00876	EC:2.7.1.48
0	ENSDARG00000071468	mrpl54	0.799752	0.621046	0.364852	0.224	0.134	9.55842e-07	0.0264883	mitochondrial ribosomal protein L54 [Source:ZFIN;Acc:ZDB-GENE-050208-381]	GO:0003735(structural constituent of ribosome);GO:0005739(mitochondrion);GO:0005762(mitochondrial large ribosomal subunit);GO:0005840(ribosome)	NA	K17435	NA
0	ENSDARG00000099802	pnp5b	1.19324	0.934097	0.353239	0.32	0.198	9.98053e-07	0.027658	purine nucleoside phosphorylase 5b [Source:ZFIN;Acc:ZDB-GENE-040912-54]	GO:0003824(catalytic activity);GO:0004731(purine-nucleoside phosphorylase activity);GO:0005737(cytoplasm);GO:0006139(nucleobase-containing compound metabolic process);GO:0009116(nucleoside metabolic process);GO:0016740(transferase activity);GO:0016757(transferase activity, transferring glycosyl groups);GO:0016763(transferase activity, transferring pentosyl groups)	NA	NA	NA
0	ENSDARG00000075963	mhc1uba	18.7634	11.7313	0.677559	0.65	0.578	1.0612e-06	0.029408	major histocompatibility complex class I UBA [Source:ZFIN;Acc:ZDB-GENE-990415-145]	GO:0005615(extracellular space);GO:0005886(plasma membrane);GO:0006955(immune response);GO:0009897(external side of plasma membrane);GO:0016020(membrane);GO:0016021(integral component of membrane)	NA	NA	NA
0	ENSDARG00000071652	rrp8	0.367307	0.300298	0.290588	0.109	0.041	1.13382e-06	0.0314204	ribosomal RNA processing 8 [Source:ZFIN;Acc:ZDB-GENE-030131-8898]	GO:0000183(chromatin silencing at rDNA);GO:0005634(nucleus);GO:0005677(chromatin silencing complex);GO:0005730(nucleolus);GO:0006364(rRNA processing);GO:0008168(methyltransferase activity);GO:0016740(transferase activity);GO:0032259(methylation);GO:0033553(rDNA heterochromatin);GO:0035064(methylated histone binding);GO:0042149(cellular response to glucose starvation);GO:0046015(regulation of tran…	NA	K14850	EC:2.1.1.287
0	ENSDARG00000043976	etf1b	2.75797	2.07753	0.408738	0.551	0.413	1.16809e-06	0.0323701	eukaryotic translation termination factor 1b [Source:ZFIN;Acc:ZDB-GENE-021029-1]	GO:0002184(cytoplasmic translational termination);GO:0003747(translation release factor activity);GO:0005737(cytoplasm);GO:0005829(cytosol);GO:0006415(translational termination);GO:0007420(brain development);GO:0016149(translation release factor activity, codon specific);GO:0018444(translation release factor complex);GO:1990825(sequence-specific mRNA binding)	03015(mRNA surveillance pathway)	K03265	NA
0	ENSDARG00000075211	chd7	1.17899	0.859154	0.456561	0.293	0.158	1.16935e-06	0.0324049	chromodomain helicase DNA binding protein 7 [Source:ZFIN;Acc:ZDB-GENE-070912-179]	GO:0001755(neural crest cell migration);GO:0001756(somitogenesis);GO:0001947(heart looping);GO:0002244(hematopoietic progenitor cell differentiation);GO:0005515(protein binding);GO:0005524(ATP binding);GO:0005634(nucleus);GO:0007368(determination of left/right symmetry);GO:0007507(heart development);GO:0009303(rRNA transcription);GO:0014029(neural crest formation);GO:0016817(hydrolase activity, a…	NA	K14437	EC:3.6.4.12
0	ENSDARG00000008740	esf1	0.968751	0.74925	0.370679	0.272	0.144	1.28254e-06	0.0355417	ESF1, nucleolar pre-rRNA processing protein, homolog (S. cerevisiae) [Source:ZFIN;Acc:ZDB-GENE-030131-4917]	GO:0003723(RNA binding);GO:0005634(nucleus);GO:0006364(rRNA processing)	NA	NA	NA
0	ENSDARG00000014817	ranbp1	2.52562	1.92974	0.388232	0.527	0.385	1.3776e-06	0.0381762	RAN binding protein 1 [Source:ZFIN;Acc:ZDB-GENE-040426-2548]	GO:0005096(GTPase activator activity);GO:0005634(nucleus);GO:0005643(nuclear pore);GO:0005737(cytoplasm);GO:0005813(centrosome);GO:0008536(Ran GTPase binding);GO:0043547(positive regulation of GTPase activity);GO:0046604(positive regulation of mitotic centrosome separation);GO:0046907(intracellular transport)	NA	NA	NA
0	ENSDARG00000069244	si:ch211-244b2.3	1.97422	1.40215	0.493644	0.33	0.187	1.71493e-06	0.0475241	si:ch211-244b2.3 [Source:ZFIN;Acc:ZDB-GENE-030131-4737]	GO:0008270(zinc ion binding)	NA	NA	NA
0	ENSDARG00000014692	znf622	0.427013	0.345963	0.303664	0.143	0.063	2.14944e-06	0.0595654	zinc finger protein 622 [Source:ZFIN;Acc:ZDB-GENE-050927-1]	GO:0003676(nucleic acid binding);GO:0008270(zinc ion binding);GO:0022625(cytosolic large ribosomal subunit);GO:0030687(preribosome, large subunit precursor);GO:0042273(ribosomal large subunit biogenesis);GO:0046872(metal ion binding)	NA	K14816	NA
0	ENSDARG00000028335	hmga1a	4.12794	3.18512	0.374078	0.636	0.485	2.21973e-06	0.0615132	high mobility group AT-hook 1a [Source:ZFIN;Acc:ZDB-GENE-010502-1]	GO:0000785(chromatin);GO:0003677(DNA binding);GO:0005634(nucleus);GO:0006355(regulation of transcription, DNA-templated);GO:0043484(regulation of RNA splicing)	NA	K09282	NA
0	ENSDARG00000001754	noc2l	0.821368	0.613883	0.420064	0.231	0.12	2.59123e-06	0.0718082	NOC2-like nucleolar associated transcriptional repressor [Source:ZFIN;Acc:ZDB-GENE-000607-75]	GO:0000122(negative regulation of transcription by RNA polymerase II);GO:0003714(transcription corepressor activity);GO:0005654(nucleoplasm);GO:0005730(nucleolus);GO:0030690(Noc1p-Noc2p complex);GO:0030691(Noc2p-Noc3p complex);GO:0035067(negative regulation of histone acetylation);GO:0042273(ribosomal large subunit biogenesis);GO:0042393(histone binding);GO:0070491(repressing transcription factor…	NA	K14833	NA
0	ENSDARG00000012899	ddx49	0.495102	0.394372	0.328168	0.156	0.068	2.66949e-06	0.073977	DEAD (Asp-Glu-Ala-Asp) box polypeptide 49 [Source:ZFIN;Acc:ZDB-GENE-031030-3]	GO:0000166(nucleotide binding);GO:0003676(nucleic acid binding);GO:0004386(helicase activity);GO:0005524(ATP binding);GO:0016787(hydrolase activity)	NA	K14778	EC:3.6.4.13
0	ENSDARG00000005423	pgam1a	5.41247	4.38094	0.305048	0.769	0.625	2.68013e-06	0.0742718	phosphoglycerate mutase 1a [Source:ZFIN;Acc:ZDB-GENE-030131-1827]	GO:0003824(catalytic activity);GO:0004082(bisphosphoglycerate mutase activity);GO:0004619(phosphoglycerate mutase activity);GO:0006096(glycolytic process);GO:0016853(isomerase activity);GO:0016868(intramolecular transferase activity, phosphotransferases)	00010(Glycolysis / Gluconeogenesis);00260(Glycine, serine and threonine metabolism)	K01834	EC:5.4.2.11
0	ENSDARG00000102353	ddx47	0.710814	0.569154	0.320654	0.204	0.119	3.16649e-06	0.0877497	DEAD (Asp-Glu-Ala-Asp) box polypeptide 47 [Source:ZFIN;Acc:ZDB-GENE-050522-359]	GO:0003676(nucleic acid binding);GO:0005524(ATP binding);GO:0005575(cellular_component)	NA	K14777	EC:3.6.4.13
0	ENSDARG00000103337	rrp1	1.06896	0.782815	0.449466	0.265	0.159	3.30755e-06	0.0916588	ribosomal RNA processing 1 [Source:ZFIN;Acc:ZDB-GENE-030131-9837]	GO:0005634(nucleus);GO:0006364(rRNA processing);GO:0030687(preribosome, large subunit precursor);GO:0030688(preribosome, small subunit precursor)	NA	K14849	NA
0	ENSDARG00000099865	hnrnpabb	3.14894	2.50566	0.329673	0.595	0.459	3.64843e-06	0.101105	heterogeneous nuclear ribonucleoprotein A/Bb [Source:ZFIN;Acc:ZDB-GENE-040426-2516]	GO:0003676(nucleic acid binding);GO:0003723(RNA binding);GO:0005654(nucleoplasm);GO:0043565(sequence-specific DNA binding);GO:1990837(sequence-specific double-stranded DNA binding);GO:1990904(ribonucleoprotein complex)	NA	NA	NA
0	ENSDARG00000029252	ssb	0.921975	0.680696	0.437718	0.228	0.135	3.72524e-06	0.103234	Sjogren syndrome antigen B (autoantigen La) [Source:ZFIN;Acc:ZDB-GENE-030131-223]	GO:0003676(nucleic acid binding);GO:0003723(RNA binding);GO:0005634(nucleus);GO:0006396(RNA processing);GO:1990904(ribonucleoprotein complex)	NA	NA	NA
0	ENSDARG00000001557	tomm34	0.730916	0.566088	0.36868	0.218	0.108	4.10546e-06	0.11377	translocase of outer mitochondrial membrane 34 [Source:ZFIN;Acc:ZDB-GENE-030131-2081]	GO:0005515(protein binding)	NA	K17766	NA
0	ENSDARG00000062510	bcl11ba	0.880666	0.643495	0.452667	0.187	0.086	5.57242e-06	0.154423	BCL11B, BAF complex component a [Source:ZFIN;Acc:ZDB-GENE-061207-62]	GO:0003676(nucleic acid binding);GO:0003700(DNA-binding transcription factor activity);GO:0005634(nucleus);GO:0006355(regulation of transcription, DNA-templated);GO:0043565(sequence-specific DNA binding)	NA	K22046	NA
0	ENSDARG00000017775	atp5mc3a	1.87391	1.53715	0.285798	0.473	0.345	6.48751e-06	0.179782	ATP synthase membrane subunit c locus 3a [Source:ZFIN;Acc:ZDB-GENE-040426-857]	GO:0000276(mitochondrial proton-transporting ATP synthase complex, coupling factor F(o));GO:0006811(ion transport);GO:0008289(lipid binding);GO:0015078(proton transmembrane transporter activity);GO:0015986(ATP synthesis coupled proton transport);GO:0015991(ATP hydrolysis coupled proton transport);GO:0016020(membrane);GO:0016021(integral component of membrane);GO:0033177(proton-transporting two-se…	00190(Oxidative phosphorylation)	K02128	NA
0	ENSDARG00000061124	srpra	2.41386	1.94506	0.311529	0.486	0.388	6.99665e-06	0.193891	SRP receptor subunit alpha [Source:ZFIN;Acc:ZDB-GENE-030219-11]	GO:0003924(GTPase activity);GO:0005047(signal recognition particle binding);GO:0005525(GTP binding);GO:0005785(signal recognition particle receptor complex);GO:0005789(endoplasmic reticulum membrane);GO:0006605(protein targeting);GO:0006614(SRP-dependent cotranslational protein targeting to membrane);GO:0006886(intracellular protein transport);GO:0016020(membrane);GO:0045047(protein targeting to …	03060(Protein export)	K13431	NA
0	ENSDARG00000088807	klhl22	1.55861	1.27195	0.293219	0.344	0.221	7.38107e-06	0.204544	kelch-like family member 22 [Source:ZFIN;Acc:ZDB-GENE-081104-154]	GO:0005515(protein binding);GO:0016567(protein ubiquitination);GO:0031463(Cul3-RING ubiquitin ligase complex);GO:0051301(cell division)	NA	K10459	NA
0	ENSDARG00000097680	si:ch211-241f5.3	1.19119	0.905047	0.396337	0.279	0.159	1.13449e-05	0.31439	si:ch211-241f5.3 [Source:ZFIN;Acc:ZDB-GENE-131127-563]	GO:0004888(transmembrane signaling receptor activity);GO:0004930(G protein-coupled receptor activity);GO:0007166(cell surface receptor signaling pathway);GO:0007186(G protein-coupled receptor signaling pathway);GO:0016020(membrane);GO:0016021(integral component of membrane)	NA	K08446	NA
0	ENSDARG00000078118	sinhcafl.1	0.451325	0.357695	0.335439	0.122	0.046	1.20527e-05	0.334004	SIN3-HDAC complex associated factor, like [Source:ZFIN;Acc:ZDB-GENE-031114-2]	NA	NA	NA	NA
0	ENSDARG00000023028	cdv3	1.81166	1.40888	0.362766	0.418	0.303	1.25718e-05	0.34839	carnitine deficiency-associated gene expressed in ventricle 3 [Source:ZFIN;Acc:ZDB-GENE-030131-6034]	GO:0005737(cytoplasm)	NA	NA	NA
0	ENSDARG00000057648	dnttip2	0.867978	0.668555	0.376613	0.228	0.128	2.03753e-05	0.564641	deoxynucleotidyltransferase, terminal, interacting protein 2 [Source:ZFIN;Acc:ZDB-GENE-080513-5]	NA	NA	NA	NA
0	ENSDARG00000026313	adgre5a	0.787703	0.60868	0.371969	0.201	0.098	2.14384e-05	0.594101	adhesion G protein-coupled receptor E5a [Source:ZFIN;Acc:ZDB-GENE-130530-571]	GO:0004930(G protein-coupled receptor activity);GO:0005509(calcium ion binding);GO:0005887(integral component of plasma membrane);GO:0007189(adenylate cyclase-activating G protein-coupled receptor signaling pathway)	NA	NA	NA
0	ENSDARG00000025332	rbm28	0.902374	0.718845	0.328044	0.269	0.158	2.22245e-05	0.615886	RNA binding motif protein 28 [Source:ZFIN;Acc:ZDB-GENE-040426-960]	GO:0003676(nucleic acid binding);GO:0003723(RNA binding);GO:0005575(cellular_component);GO:0005730(nucleolus);GO:1990904(ribonucleoprotein complex)	03008(Ribosome biogenesis in eukaryotes)	K14573	NA
0	ENSDARG00000092115	eif4a1a	6.8574	5.65562	0.277974	0.813	0.704	2.77663e-05	0.769459	eukaryotic translation initiation factor 4A1A [Source:ZFIN;Acc:ZDB-GENE-031030-2]	GO:0003676(nucleic acid binding);GO:0003743(translation initiation factor activity);GO:0004004(ATP-dependent RNA helicase activity);GO:0005524(ATP binding);GO:0006413(translational initiation)	03013(RNA transport)	K03257	NA
0	ENSDARG00000094295	CR855337.1	2.21336	1.81101	0.289441	0.429	0.298	2.84758e-05	0.78912	KIAA0040 ortholog [Source:NCBI gene;Acc:100536987]	NA	NA	NA	NA
0	ENSDARG00000057299	pbdc1	0.592443	0.486811	0.283316	0.204	0.113	3.29507e-05	0.913129	polysaccharide biosynthesis domain containing 1 [Source:ZFIN;Acc:ZDB-GENE-040718-459]	GO:0003674(molecular_function);GO:0008150(biological_process)	NA	NA	NA
0	ENSDARG00000045857	cebpz	0.512082	0.410598	0.31865	0.15	0.068	4.02834e-05	1	CCAAT enhancer binding protein zeta [Source:ZFIN;Acc:ZDB-GENE-050417-261]	GO:0003674(molecular_function);GO:0042254(ribosome biogenesis)	NA	K14832	NA
0	ENSDARG00000055751	fosb	1.54022	1.19098	0.370979	0.269	0.156	4.31373e-05	1	FBJ murine osteosarcoma viral oncogene homolog B [Source:ZFIN;Acc:ZDB-GENE-041114-181]	GO:0000978(RNA polymerase II proximal promoter sequence-specific DNA binding);GO:0003677(DNA binding);GO:0003700(DNA-binding transcription factor activity);GO:0005634(nucleus);GO:0006355(regulation of transcription, DNA-templated);GO:0006357(regulation of transcription by RNA polymerase II)	NA	K09029	NA
0	ENSDARG00000032317	tox	1.3846	1.10281	0.32828	0.272	0.161	4.41607e-05	1	thymocyte selection-associated high mobility group box [Source:ZFIN;Acc:ZDB-GENE-070912-181]	GO:0003677(DNA binding);GO:0005634(nucleus)	NA	NA	NA
0	ENSDARG00000070475	khdrbs1b	2.58107	2.01708	0.3557	0.49	0.372	4.88898e-05	1	KH domain containing, RNA binding, signal transduction associated 1b [Source:ZFIN;Acc:ZDB-GENE-040426-2344]	GO:0003676(nucleic acid binding);GO:0003723(RNA binding)	NA	K13198	NA
0	ENSDARG00000053047	eif2s2	1.99952	1.5716	0.347417	0.446	0.339	5.41078e-05	1	eukaryotic translation initiation factor 2, subunit 2 beta [Source:ZFIN;Acc:ZDB-GENE-030131-3085]	GO:0003743(translation initiation factor activity);GO:0006413(translational initiation)	03013(RNA transport)	K03238	NA
0	ENSDARG00000038768	mrpl12	0.697118	0.558296	0.320371	0.228	0.124	5.69072e-05	1	mitochondrial ribosomal protein L12 [Source:ZFIN;Acc:ZDB-GENE-050417-187]	GO:0003735(structural constituent of ribosome);GO:0005622(intracellular);GO:0005762(mitochondrial large ribosomal subunit);GO:0005840(ribosome);GO:0006390(mitochondrial transcription);GO:0006412(translation)	03010(Ribosome)	K02935	NA
0	ENSDARG00000011818	batf	0.636965	0.529719	0.265986	0.184	0.093	6.02603e-05	1	basic leucine zipper transcription factor, ATF-like [Source:ZFIN;Acc:ZDB-GENE-041014-291]	GO:0000978(RNA polymerase II proximal promoter sequence-specific DNA binding);GO:0001816(cytokine production);GO:0002320(lymphoid progenitor cell differentiation);GO:0003677(DNA binding);GO:0003700(DNA-binding transcription factor activity);GO:0005634(nucleus);GO:0005737(cytoplasm);GO:0006355(regulation of transcription, DNA-templated);GO:0006357(regulation of transcription by RNA polymerase II);…	NA	K09034	NA
0	ENSDARG00000055389	si:dkey-67c22.2	1.00692	0.813694	0.30739	0.259	0.173	6.71623e-05	1	si:dkey-67c22.2 [Source:ZFIN;Acc:ZDB-GENE-030131-5845]	NA	NA	NA	NA
0	ENSDARG00000055900	zswim5	2.22296	1.71029	0.378238	0.415	0.288	6.84819e-05	1	zinc finger, SWIM-type containing 5 [Source:ZFIN;Acc:ZDB-GENE-030925-30]	GO:0031462(Cul2-RING ubiquitin ligase complex);GO:1902667(regulation of axon guidance)	NA	NA	NA
0	ENSDARG00000061757	rabgap1l	1.44711	1.15499	0.325294	0.34	0.224	7.54875e-05	1	RAB GTPase activating protein 1-like [Source:ZFIN;Acc:ZDB-GENE-050208-389]	GO:0005096(GTPase activator activity);GO:0005515(protein binding);GO:0005623(cell);GO:0006886(intracellular protein transport);GO:0017137(Rab GTPase binding);GO:0043547(positive regulation of GTPase activity);GO:0090630(activation of GTPase activity)	NA	K20284	NA
0	ENSDARG00000004806	grwd1	0.772413	0.613257	0.332881	0.214	0.118	7.65425e-05	1	glutamate-rich WD repeat containing 1 [Source:ZFIN;Acc:ZDB-GENE-030131-9844]	GO:0003674(molecular_function);GO:0005515(protein binding);GO:0005634(nucleus);GO:0008150(biological_process)	NA	K14848	NA
0	ENSDARG00000077383	anxa11a	5.15533	3.89257	0.405344	0.622	0.528	9.55828e-05	1	annexin A11a [Source:ZFIN;Acc:ZDB-GENE-030707-4]	GO:0005509(calcium ion binding);GO:0005515(protein binding);GO:0005544(calcium-dependent phospholipid binding);GO:0005737(cytoplasm);GO:0006909(phagocytosis);GO:0008429(phosphatidylethanolamine binding);GO:0032506(cytokinetic process);GO:0044548(S100 protein binding);GO:0048306(calcium-dependent protein binding);GO:0051592(response to calcium ion)	NA	K17095	NA
0	ENSDARG00000006200	eif4g1a	2.03417	1.64891	0.302934	0.449	0.35	9.56222e-05	1	eukaryotic translation initiation factor 4 gamma, 1a [Source:ZFIN;Acc:ZDB-GENE-070112-702]	GO:0003723(RNA binding);GO:0003729(mRNA binding);GO:0003743(translation initiation factor activity);GO:0005515(protein binding);GO:0005575(cellular_component);GO:0006413(translational initiation);GO:0016281(eukaryotic translation initiation factor 4F complex)	03013(RNA transport)	K03260	NA
0	ENSDARG00000069846	zgc:162944	5.87615	4.68101	0.328051	0.772	0.661	0.000109385	1	zgc:162944 [Source:ZFIN;Acc:ZDB-GENE-070424-75]	GO:0003674(molecular_function);GO:0008150(biological_process)	NA	NA	NA
0	ENSDARG00000012271	tmem206	0.654637	0.516244	0.342641	0.16	0.086	0.000123035	1	transmembrane protein 206 [Source:ZFIN;Acc:ZDB-GENE-040426-1173]	GO:0016020(membrane);GO:0016021(integral component of membrane)	NA	NA	NA
0	ENSDARG00000097032	si:ch211-256a21.4	1.6519	1.22752	0.428378	0.303	0.196	0.000158048	1	si:ch211-256a21.4 [Source:ZFIN;Acc:ZDB-GENE-131121-329]	GO:0016020(membrane);GO:0016021(integral component of membrane)	NA	NA	NA
0	ENSDARG00000007216	abce1	0.935635	0.751507	0.31616	0.265	0.176	0.000171082	1	ATP-binding cassette, sub-family E (OABP), member 1 [Source:ZFIN;Acc:ZDB-GENE-040426-1995]	GO:0000054(ribosomal subunit export from nucleus);GO:0000166(nucleotide binding);GO:0005506(iron ion binding);GO:0005524(ATP binding);GO:0005623(cell);GO:0006413(translational initiation);GO:0006415(translational termination);GO:0016887(ATPase activity);GO:0043024(ribosomal small subunit binding)	NA	K06174	NA
0	ENSDARG00000093748	si:ch211-217k17.11	1.37327	0.938883	0.548596	0.214	0.12	0.000200358	1	si:ch211-217k17.11 [Source:ZFIN;Acc:ZDB-GENE-030131-8636]	NA	NA	NA	NA
0	ENSDARG00000098935	bxdc2	0.539053	0.437788	0.300196	0.18	0.095	0.000211811	1	brix domain containing 2 [Source:ZFIN;Acc:ZDB-GENE-060518-1]	GO:0000027(ribosomal large subunit assembly);GO:0005730(nucleolus)	NA	K14820	NA
0	ENSDARG00000005738	rpf1	0.766655	0.602163	0.348423	0.211	0.12	0.000222151	1	ribosome production factor 1 homolog [Source:ZFIN;Acc:ZDB-GENE-040625-177]	NA	NA	K14846	NA
0	ENSDARG00000031246	hbegfb	1.22309	0.853494	0.51908	0.139	0.063	0.000283264	1	heparin-binding EGF-like growth factor b [Source:ZFIN;Acc:ZDB-GENE-070820-6]	GO:0005154(epidermal growth factor receptor binding);GO:0005615(extracellular space);GO:0007173(epidermal growth factor receptor signaling pathway);GO:0008083(growth factor activity);GO:0008284(positive regulation of cell population proliferation);GO:0010469(regulation of signaling receptor activity);GO:0016020(membrane);GO:0016021(integral component of membrane);GO:0060047(heart contraction)	NA	NA	NA
0	ENSDARG00000015524	prps1a	1.07788	0.873801	0.302814	0.289	0.194	0.000302762	1	phosphoribosyl pyrophosphate synthetase 1A [Source:ZFIN;Acc:ZDB-GENE-011212-5]	GO:0000287(magnesium ion binding);GO:0002189(ribose phosphate diphosphokinase complex);GO:0004749(ribose phosphate diphosphokinase activity);GO:0005524(ATP binding);GO:0005737(cytoplasm);GO:0006015(5-phosphoribose 1-diphosphate biosynthetic process);GO:0006164(purine nucleotide biosynthetic process);GO:0009116(nucleoside metabolic process);GO:0009156(ribonucleoside monophosphate biosynthetic proc…	00030(Pentose phosphate pathway);00230(Purine metabolism)	K00948	EC:2.7.6.1
0	ENSDARG00000001057	bysl	1.08032	0.862759	0.324435	0.286	0.194	0.000305241	1	bystin-like [Source:ZFIN;Acc:ZDB-GENE-040426-1287]	GO:0005634(nucleus);GO:0005730(nucleolus);GO:0005737(cytoplasm);GO:0006364(rRNA processing);GO:0030515(snoRNA binding);GO:0030688(preribosome, small subunit precursor)	NA	K14797	NA
0	ENSDARG00000016516	rbm8a	2.57834	2.08413	0.306999	0.551	0.447	0.000353538	1	RNA binding motif protein 8A [Source:ZFIN;Acc:ZDB-GENE-050306-51]	GO:0000184(nuclear-transcribed mRNA catabolic process, nonsense-mediated decay);GO:0000381(regulation of alternative mRNA splicing, via spliceosome);GO:0000398(mRNA splicing, via spliceosome);GO:0003676(nucleic acid binding);GO:0003723(RNA binding);GO:0003729(mRNA binding);GO:0005634(nucleus);GO:0005737(cytoplasm);GO:0006396(RNA processing);GO:0006397(mRNA processing);GO:0006417(regulation of tra…	03013(RNA transport);03015(mRNA surveillance pathway);03040(Spliceosome)	K12876	NA
0	ENSDARG00000099710	BX284696.1	1.15307	0.934855	0.302661	0.265	0.189	0.000373143	1	NA	NA	NA	NA	NA
0	ENSDARG00000011648	snrpd1	1.40275	1.16499	0.267943	0.384	0.266	0.000389377	1	small nuclear ribonucleoprotein D1 polypeptide [Source:ZFIN;Acc:ZDB-GENE-020419-14]	GO:0000243(commitment complex);GO:0000387(spliceosomal snRNP assembly);GO:0003723(RNA binding);GO:0005634(nucleus);GO:0005682(U5 snRNP);GO:0005685(U1 snRNP);GO:0005686(U2 snRNP);GO:0005687(U4 snRNP);GO:0005689(U12-type spliceosomal complex);GO:0006396(RNA processing);GO:0006397(mRNA processing);GO:0007507(heart development);GO:0008380(RNA splicing);GO:0034715(pICln-Sm protein complex);GO:0034719(…	03040(Spliceosome)	K11087	NA
0	ENSDARG00000031795	abcf1	1.06208	0.83721	0.343235	0.265	0.172	0.000423165	1	ATP-binding cassette, sub-family F (GCN20), member 1 [Source:ZFIN;Acc:ZDB-GENE-050517-31]	GO:0000166(nucleotide binding);GO:0005524(ATP binding);GO:0016887(ATPase activity)	NA	K06184	NA
0	ENSDARG00000031495	seta	2.19568	1.80992	0.278741	0.469	0.387	0.000462669	1	SET nuclear proto-oncogene a [Source:ZFIN;Acc:ZDB-GENE-030131-2221]	GO:0005634(nucleus);GO:0006334(nucleosome assembly)	NA	K11290	NA
0	ENSDARG00000061451	n4bp2	0.529554	0.433917	0.28736	0.133	0.065	0.000700524	1	NEDD4 binding protein 2 [Source:ZFIN;Acc:ZDB-GENE-061103-451]	GO:0005515(protein binding);GO:0005575(cellular_component)	NA	K15720	EC:3.-.-.-
0	ENSDARG00000103444	gig2h	0.46738	0.384289	0.282405	0.112	0.057	0.000923815	1	grass carp reovirus (GCRV)-induced gene 2h [Source:ZFIN;Acc:ZDB-GENE-130517-5]	GO:0003950(NAD+ ADP-ribosyltransferase activity);GO:0005737(cytoplasm)	NA	NA	NA
0	ENSDARG00000014498	ythdf2	0.575198	0.476386	0.271928	0.167	0.095	0.000949386	1	YTH N(6)-methyladenosine RNA binding protein 2 [Source:ZFIN;Acc:ZDB-GENE-040426-948]	GO:0000932(P-body);GO:0001556(oocyte maturation);GO:0003723(RNA binding);GO:0005634(nucleus);GO:0005737(cytoplasm);GO:0005829(cytosol);GO:0006401(RNA catabolic process);GO:0006402(mRNA catabolic process);GO:0045746(negative regulation of Notch signaling pathway);GO:0048598(embryonic morphogenesis);GO:0061157(mRNA destabilization);GO:0071425(hematopoietic stem cell proliferation);GO:0098508(endoth…	NA	K20102	NA
0	ENSDARG00000093799	setbp1	0.977003	0.811057	0.26856	0.218	0.143	0.00106886	1	SET binding protein 1 [Source:ZFIN;Acc:ZDB-GENE-060526-72]	GO:0003677(DNA binding)	NA	K23217	NA
0	ENSDARG00000030700	ctps1a	0.537923	0.437964	0.296589	0.153	0.084	0.00113164	1	CTP synthase 1a [Source:ZFIN;Acc:ZDB-GENE-030131-808]	GO:0000166(nucleotide binding);GO:0003883(CTP synthase activity);GO:0005524(ATP binding);GO:0006221(pyrimidine nucleotide biosynthetic process);GO:0006241(CTP biosynthetic process);GO:0006541(glutamine metabolic process);GO:0016874(ligase activity);GO:0044210('de novo' CTP biosynthetic process)	00240(Pyrimidine metabolism)	K01937	EC:6.3.4.2
0	ENSDARG00000003860	cbx3a	1.33326	1.06777	0.320361	0.323	0.235	0.00127785	1	chromobox homolog 3a (HP1 gamma homolog, Drosophila) [Source:ZFIN;Acc:ZDB-GENE-030131-1158]	GO:0005634(nucleus);GO:0005719(nuclear euchromatin);GO:0045892(negative regulation of transcription, DNA-templated)	NA	K11586	NA
0	ENSDARG00000036787	tap2a	0.935033	0.740393	0.336726	0.211	0.126	0.00128065	1	transporter associated with antigen processing, subunit type a [Source:ZFIN;Acc:ZDB-GENE-030616-245]	GO:0000166(nucleotide binding);GO:0005524(ATP binding);GO:0005765(lysosomal membrane);GO:0015440(peptide-transporting ATPase activity);GO:0015833(peptide transport);GO:0016020(membrane);GO:0016021(integral component of membrane);GO:0016887(ATPase activity);GO:0042626(ATPase activity, coupled to transmembrane movement of substances);GO:0046686(response to cadmium ion);GO:0055085(transmembrane tran…	02010(ABC transporters);04145(Phagosome);05168(Herpes simplex virus 1 infection)	K05654	NA
0	ENSDARG00000005220	pdcd6	1.68835	1.30603	0.370431	0.333	0.243	0.0018494	1	programmed cell death 6 [Source:ZFIN;Acc:ZDB-GENE-040426-1307]	GO:0005509(calcium ion binding)	NA	NA	NA
0	ENSDARG00000000489	upf3b	2.33523	1.7288	0.433792	0.333	0.238	0.00215433	1	UPF3B, regulator of nonsense mediated mRNA decay [Source:ZFIN;Acc:ZDB-GENE-040426-1630]	GO:0000184(nuclear-transcribed mRNA catabolic process, nonsense-mediated decay);GO:0003676(nucleic acid binding);GO:0003729(mRNA binding);GO:0005730(nucleolus);GO:0005737(cytoplasm);GO:0045727(positive regulation of translation)	03013(RNA transport);03015(mRNA surveillance pathway)	K14328	NA
0	ENSDARG00000100452	nop53	4.10712	3.42316	0.262796	0.684	0.577	0.00239932	1	NOP53 ribosome biogenesis factor [Source:ZFIN;Acc:ZDB-GENE-051120-21]	GO:0000027(ribosomal large subunit assembly);GO:0005634(nucleus);GO:0005654(nucleoplasm);GO:0005730(nucleolus);GO:0006364(rRNA processing);GO:0008097(5S rRNA binding);GO:0042254(ribosome biogenesis)	NA	K14840	NA
0	ENSDARG00000051798	brd1b	1.27953	1.03094	0.311664	0.299	0.234	0.00258489	1	bromodomain containing 1b [Source:ZFIN;Acc:ZDB-GENE-070209-98]	GO:0005515(protein binding);GO:0046872(metal ion binding)	NA	K11349	NA
0	ENSDARG00000095724	si:ch211-196c10.15	1.04371	0.869954	0.262707	0.245	0.182	0.00346903	1	si:ch211-196c10.15 [Source:ZFIN;Acc:ZDB-GENE-141216-138]	NA	NA	NA	NA
0	ENSDARG00000032651	ppp1r10	0.826646	0.659761	0.325325	0.207	0.143	0.00419153	1	protein phosphatase 1, regulatory subunit 10 [Source:ZFIN;Acc:ZDB-GENE-020419-15]	GO:0005634(nucleus);GO:0046872(metal ion binding)	NA	K17552	NA
0	ENSDARG00000012244	ube2e3	1.48495	1.22777	0.274376	0.33	0.273	0.00436513	1	ubiquitin-conjugating enzyme E2E 3 (UBC4/5 homolog, yeast) [Source:ZFIN;Acc:ZDB-GENE-030131-408]	GO:0000166(nucleotide binding);GO:0005524(ATP binding);GO:0005575(cellular_component);GO:0016567(protein ubiquitination);GO:0016740(transferase activity);GO:0061631(ubiquitin conjugating enzyme activity)	04120(Ubiquitin mediated proteolysis)	K20217	EC:2.3.2.23
0	ENSDARG00000061417	nub1	0.767321	0.600247	0.354275	0.17	0.108	0.00479478	1	negative regulator of ubiquitin-like proteins 1 [Source:ZFIN;Acc:ZDB-GENE-080212-11]	GO:0003674(molecular_function);GO:0005515(protein binding);GO:0005575(cellular_component);GO:0008150(biological_process)	NA	NA	NA
0	ENSDARG00000031885	psmb12	1.091	0.864789	0.335234	0.252	0.18	0.00634984	1	proteasome subunit beta 12 [Source:ZFIN;Acc:ZDB-GENE-001208-1]	GO:0000502(proteasome complex);GO:0004175(endopeptidase activity);GO:0004298(threonine-type endopeptidase activity);GO:0005634(nucleus);GO:0005737(cytoplasm);GO:0005839(proteasome core complex);GO:0006508(proteolysis);GO:0008233(peptidase activity);GO:0010498(proteasomal protein catabolic process);GO:0010499(proteasomal ubiquitin-independent protein catabolic process);GO:0016787(hydrolase activit…	03050(Proteasome)	K02738	EC:3.4.25.1
0	ENSDARG00000070545	top1l	2.03281	1.68251	0.272855	0.415	0.351	0.00889393	1	DNA topoisomerase I, like [Source:ZFIN;Acc:ZDB-GENE-060616-217]	GO:0003677(DNA binding);GO:0003916(DNA topoisomerase activity);GO:0003917(DNA topoisomerase type I activity);GO:0005694(chromosome);GO:0005730(nucleolus);GO:0006260(DNA replication);GO:0006265(DNA topological change);GO:0006338(chromatin remodeling);GO:0007059(chromosome segregation);GO:0016853(isomerase activity);GO:0031298(replication fork protection complex)	NA	K03163	EC:5.6.2.1
1	ENSDARG00000105263	ccl36.1	20.3237	5.96586	1.76836	0.715	0.202	1.2545e-62	3.47647e-58	chemokine (C-C motif) ligand 36, duplicate 1 [Source:ZFIN;Acc:ZDB-GENE-140718-2]	GO:0002548(monocyte chemotaxis);GO:0005125(cytokine activity);GO:0005576(extracellular region);GO:0005615(extracellular space);GO:0006935(chemotaxis);GO:0006954(inflammatory response);GO:0006955(immune response);GO:0007186(G protein-coupled receptor signaling pathway);GO:0008009(chemokine activity);GO:0010469(regulation of signaling receptor activity);GO:0030593(neutrophil chemotaxis);GO:0043547(…	NA	NA	NA
1	ENSDARG00000041923	ccl38.6	13.2006	3.5425	1.89776	0.563	0.135	6.09641e-51	1.68944e-46	chemokine (C-C motif) ligand 38, duplicate 6 [Source:ZFIN;Acc:ZDB-GENE-041014-165]	GO:0005125(cytokine activity);GO:0005576(extracellular region);GO:0005615(extracellular space);GO:0006935(chemotaxis);GO:0006955(immune response);GO:0008009(chemokine activity);GO:0010469(regulation of signaling receptor activity);GO:0060326(cell chemotaxis)	04060(Cytokine-cytokine receptor interaction)	K16596	NA
1	ENSDARG00000101767	si:dkey-183i3.6	6.38013	1.94161	1.71634	0.586	0.163	1.43689e-49	3.98192e-45	si:dkey-183i3.6 [Source:ZFIN;Acc:ZDB-GENE-141212-342]	GO:0016020(membrane);GO:0016021(integral component of membrane)	NA	NA	NA
1	ENSDARG00000096655	BX901920.1	11.6397	3.87409	1.58712	0.669	0.354	5.36329e-39	1.48627e-34	NA	NA	NA	NA	NA
1	ENSDARG00000086616	cabz01093075.1	2.95328	1.02635	1.5248	0.357	0.067	1.11327e-38	3.08511e-34	cabz01093075.1 [Source:ZFIN;Acc:ZDB-GENE-160113-9]	GO:0004930(G protein-coupled receptor activity);GO:0004950(chemokine receptor activity);GO:0006935(chemotaxis);GO:0006955(immune response);GO:0007165(signal transduction);GO:0007186(G protein-coupled receptor signaling pathway);GO:0007204(positive regulation of cytosolic calcium ion concentration);GO:0009897(external side of plasma membrane);GO:0016020(membrane);GO:0016021(integral component of m…	NA	NA	NA
1	ENSDARG00000020788	sla2	23.2103	9.08626	1.353	0.795	0.533	2.49262e-33	6.90754e-29	Src-like-adaptor 2 [Source:ZFIN;Acc:ZDB-GENE-080204-98]	GO:0005070(SH3/SH2 adaptor activity);GO:0005515(protein binding);GO:0005575(cellular_component);GO:0009966(regulation of signal transduction);GO:0009967(positive regulation of signal transduction)	NA	NA	NA
1	ENSDARG00000095908	sat1a.2	36.4931	22.7837	0.679622	0.996	0.976	2.52351e-31	6.99314e-27	spermidine/spermine N1-acetyltransferase 1a, duplicate 2 [Source:ZFIN;Acc:ZDB-GENE-040704-4]	GO:0004145(diamine N-acetyltransferase activity);GO:0005515(protein binding);GO:0005575(cellular_component);GO:0008080(N-acetyltransferase activity);GO:0016740(transferase activity);GO:0019809(spermidine binding);GO:0032918(spermidine acetylation)	00330(Arginine and proline metabolism);04216(Ferroptosis)	K00657	EC:2.3.1.57
1	ENSDARG00000015922	stk17al	7.71028	3.26679	1.23891	0.639	0.402	4.13314e-29	1.14537e-24	serine/threonine kinase 17a like [Source:ZFIN;Acc:ZDB-GENE-061103-427]	GO:0004672(protein kinase activity);GO:0004674(protein serine/threonine kinase activity);GO:0005524(ATP binding);GO:0005634(nucleus);GO:0006468(protein phosphorylation)	NA	K08804	EC:2.7.11.1
1	ENSDARG00000100887	si:dkey-11f4.20	1.16962	0.558058	1.06755	0.156	0.009	6.22286e-28	1.72448e-23	si:dkey-11f4.20 [Source:ZFIN;Acc:ZDB-GENE-070912-359]	GO:0016020(membrane);GO:0016021(integral component of membrane)	04514(Cell adhesion molecules (CAMs))	K06449	NA
1	ENSDARG00000099148	bzw1b	17.2077	8.68579	0.986327	0.875	0.794	1.23318e-27	3.4174e-23	basic leucine zipper and W2 domains 1b [Source:ZFIN;Acc:ZDB-GENE-040426-2881]	GO:0005515(protein binding)	NA	NA	NA
1	ENSDARG00000098024	si:dkey-262k9.2	5.65083	2.29726	1.29855	0.525	0.27	1.56432e-27	4.33503e-23	si:dkey-262k9.2 [Source:ZFIN;Acc:ZDB-GENE-131121-282]	GO:0016020(membrane);GO:0016021(integral component of membrane)	NA	NA	NA
1	ENSDARG00000111357	tnfsf14	3.23361	1.44708	1.16	0.388	0.105	4.91505e-27	1.36206e-22	TNF superfamily member 14 [Source:ZFIN;Acc:ZDB-GENE-101109-3]	GO:0005164(tumor necrosis factor receptor binding);GO:0005515(protein binding);GO:0006955(immune response);GO:0016020(membrane);GO:0016021(integral component of membrane)	04060(Cytokine-cytokine receptor interaction);05168(Herpes simplex virus 1 infection)	K05477	NA
1	ENSDARG00000019702	aldocb	10.5466	5.22911	1.01214	0.745	0.592	3.16454e-26	8.76956e-22	aldolase C, fructose-bisphosphate, b [Source:ZFIN;Acc:ZDB-GENE-030821-1]	GO:0003824(catalytic activity);GO:0004332(fructose-bisphosphate aldolase activity);GO:0005575(cellular_component);GO:0006096(glycolytic process);GO:0016829(lyase activity)	00010(Glycolysis / Gluconeogenesis);00030(Pentose phosphate pathway);00051(Fructose and mannose metabolism)	K01623	EC:4.1.2.13
1	ENSDARG00000031768	roraa	1.44676	0.708428	1.03013	0.232	0.06	1.14301e-25	3.16751e-21	RAR-related orphan receptor A, paralog a [Source:ZFIN;Acc:ZDB-GENE-060306-2]	GO:0003677(DNA binding);GO:0003700(DNA-binding transcription factor activity);GO:0003707(steroid hormone receptor activity);GO:0004879(nuclear receptor activity);GO:0005634(nucleus);GO:0006355(regulation of transcription, DNA-templated);GO:0007275(multicellular organism development);GO:0008270(zinc ion binding);GO:0010468(regulation of gene expression);GO:0010628(positive regulation of gene expre…	NA	K08532	NA
1	ENSDARG00000104773	junbb	4.86714	2.14873	1.17959	0.498	0.272	2.57607e-25	7.1388e-21	JunB proto-oncogene, AP-1 transcription factor subunit b [Source:ZFIN;Acc:ZDB-GENE-040426-2666]	GO:0000122(negative regulation of transcription by RNA polymerase II);GO:0000790(nuclear chromatin);GO:0000978(RNA polymerase II proximal promoter sequence-specific DNA binding);GO:0000981(DNA-binding transcription factor activity, RNA polymerase II-specific);GO:0001945(lymph vessel development);GO:0003677(DNA binding);GO:0003700(DNA-binding transcription factor activity);GO:0003713(transcription…	NA	NA	NA
1	ENSDARG00000042725	cebpb	29.0358	13.7746	1.07582	0.871	0.724	3.61541e-25	1.0019e-20	CCAAT enhancer binding protein beta [Source:ZFIN;Acc:ZDB-GENE-020111-3]	GO:0001878(response to yeast);GO:0003677(DNA binding);GO:0003700(DNA-binding transcription factor activity);GO:0005634(nucleus);GO:0006355(regulation of transcription, DNA-templated);GO:0009617(response to bacterium);GO:0044030(regulation of DNA methylation)	NA	K10048	NA
1	ENSDARG00000031317	ppdpfb	4.28062	2.0458	1.06516	0.407	0.336	2.0968e-24	5.81066e-20	pancreatic progenitor cell differentiation and proliferation factor b [Source:ZFIN;Acc:ZDB-GENE-030131-8247]	GO:0001708(cell fate specification);GO:0007275(multicellular organism development);GO:0030154(cell differentiation);GO:0031017(exocrine pancreas development)	NA	NA	NA
1	ENSDARG00000077557	nitr5	1.31578	0.599979	1.13293	0.144	0.012	2.14552e-24	5.94567e-20	novel immune-type receptor 5 [Source:ZFIN;Acc:ZDB-GENE-020225-40]	GO:0016020(membrane);GO:0016021(integral component of membrane)	NA	NA	NA
1	ENSDARG00000100387	si:dkey-78o7.3	4.68391	1.87481	1.32097	0.38	0.124	3.1441e-24	8.71293e-20	si:dkey-78o7.3 [Source:ZFIN;Acc:ZDB-GENE-120709-79]	NA	NA	NA	NA
1	ENSDARG00000101849	adipor2	3.24626	1.54082	1.07508	0.346	0.246	6.46486e-23	1.79154e-18	adiponectin receptor 2 [Source:ZFIN;Acc:ZDB-GENE-041210-60]	GO:0005886(plasma membrane);GO:0016020(membrane);GO:0016021(integral component of membrane);GO:0033211(adiponectin-activated signaling pathway);GO:0038023(signaling receptor activity)	04920(Adipocytokine signaling pathway)	K07297	NA
1	ENSDARG00000020693	sesn1	4.6708	1.9114	1.28904	0.369	0.238	1.19998e-22	3.32539e-18	sestrin 1 [Source:ZFIN;Acc:ZDB-GENE-040718-408]	GO:0003674(molecular_function);GO:0005634(nucleus);GO:0005737(cytoplasm);GO:0007368(determination of left/right symmetry);GO:0016239(positive regulation of macroautophagy);GO:0016684(oxidoreductase activity, acting on peroxide as acceptor);GO:0031932(TORC2 complex);GO:0055114(oxidation-reduction process);GO:0061700(GATOR2 complex);GO:0070728(leucine binding);GO:0071230(cellular response to amino …	04115(p53 signaling pathway)	K10141	NA
1	ENSDARG00000053136	b2m	58.475	41.5365	0.493442	0.992	0.993	1.25248e-22	3.47087e-18	beta-2-microglobulin [Source:ZFIN;Acc:ZDB-GENE-980526-88]	GO:0002376(immune system process);GO:0002474(antigen processing and presentation of peptide antigen via MHC class I);GO:0002755(MyD88-dependent toll-like receptor signaling pathway);GO:0004672(protein kinase activity);GO:0005515(protein binding);GO:0005524(ATP binding);GO:0005576(extracellular region);GO:0006468(protein phosphorylation);GO:0006955(immune response);GO:0007165(signal transduction);…	05168(Herpes simplex virus 1 infection)	K08055	NA
1	ENSDARG00000099970	CR383676.1	485.423	351.51	0.465678	1	0.996	2.60918e-22	7.23057e-18	NA	NA	NA	NA	NA
1	ENSDARG00000102332	spint1a	1.6425	0.851538	0.947747	0.274	0.089	7.95653e-21	2.20491e-16	serine peptidase inhibitor, Kunitz type 1 a [Source:ZFIN;Acc:ZDB-GENE-040426-2169]	GO:0004867(serine-type endopeptidase inhibitor activity);GO:0005515(protein binding);GO:0008544(epidermis development);GO:0010951(negative regulation of endopeptidase activity);GO:0016020(membrane);GO:0016021(integral component of membrane);GO:0030199(collagen fibril organization);GO:0030593(neutrophil chemotaxis);GO:0060429(epithelium development)	NA	NA	NA
1	ENSDARG00000019396	rergla	2.18184	0.833964	1.38749	0.171	0.027	1.23668e-20	3.42709e-16	RERG/RAS-like a [Source:ZFIN;Acc:ZDB-GENE-040718-198]	GO:0003924(GTPase activity);GO:0005525(GTP binding);GO:0007165(signal transduction);GO:0016020(membrane)	NA	K17198	NA
1	ENSDARG00000052826	runx3	6.99225	3.42413	1.03002	0.586	0.383	8.38442e-20	2.32349e-15	runt-related transcription factor 3 [Source:ZFIN;Acc:ZDB-GENE-000605-2]	GO:0000981(DNA-binding transcription factor activity, RNA polymerase II-specific);GO:0002062(chondrocyte differentiation);GO:0003677(DNA binding);GO:0003700(DNA-binding transcription factor activity);GO:0005524(ATP binding);GO:0005634(nucleus);GO:0006355(regulation of transcription, DNA-templated);GO:0006357(regulation of transcription by RNA polymerase II);GO:0030097(hemopoiesis);GO:0030182(neur…	NA	K09279	NA
1	ENSDARG00000041835	ccl38a.5	4.06861	1.59081	1.35477	0.228	0.047	9.4503e-20	2.61887e-15	chemokine (C-C motif) ligand 38, duplicate 5 [Source:ZFIN;Acc:ZDB-GENE-041014-167]	GO:0002548(monocyte chemotaxis);GO:0005125(cytokine activity);GO:0005576(extracellular region);GO:0005615(extracellular space);GO:0006935(chemotaxis);GO:0006954(inflammatory response);GO:0006955(immune response);GO:0007186(G protein-coupled receptor signaling pathway);GO:0008009(chemokine activity);GO:0010469(regulation of signaling receptor activity);GO:0030593(neutrophil chemotaxis);GO:0043547(…	NA	NA	NA
1	ENSDARG00000099555	foxo1a	8.2196	3.67935	1.15962	0.555	0.351	1.76779e-19	4.89891e-15	forkhead box O1 a [Source:ZFIN;Acc:ZDB-GENE-061013-59]	GO:0000122(negative regulation of transcription by RNA polymerase II);GO:0000981(DNA-binding transcription factor activity, RNA polymerase II-specific);GO:0001945(lymph vessel development);GO:0003677(DNA binding);GO:0003700(DNA-binding transcription factor activity);GO:0005634(nucleus);GO:0005737(cytoplasm);GO:0006355(regulation of transcription, DNA-templated);GO:0008134(transcription factor bin…	04068(FoxO signaling pathway);04218(Cellular senescence);04910(Insulin signaling pathway);04933(AGE-RAGE signaling pathway in diabetic complications)	K07201	NA
1	ENSDARG00000053291	pnrc2	52.3555	38.0135	0.461831	0.985	0.994	2.27881e-19	6.31503e-15	proline-rich nuclear receptor coactivator 2 [Source:ZFIN;Acc:ZDB-GENE-030131-5475]	GO:0000184(nuclear-transcribed mRNA catabolic process, nonsense-mediated decay);GO:0000932(P-body);GO:0000956(nuclear-transcribed mRNA catabolic process);GO:0005634(nucleus);GO:0005737(cytoplasm)	NA	K18751	NA
1	ENSDARG00000103720	zgc:162730	17.148	9.0517	0.921784	0.772	0.58	7.52151e-19	2.08436e-14	zgc:162730 [Source:ZFIN;Acc:ZDB-GENE-030131-6366]	GO:0003730(mRNA 3'-UTR binding);GO:0005829(cytosol);GO:0046872(metal ion binding);GO:0061158(3'-UTR-mediated mRNA destabilization)	NA	NA	NA
1	ENSDARG00000068367	nfkbie	7.30424	4.4886	0.70247	0.684	0.612	9.28338e-19	2.57261e-14	nuclear factor of kappa light polypeptide gene enhancer in B-cells inhibitor, epsilon [Source:ZFIN;Acc:ZDB-GENE-061215-132]	GO:0003674(molecular_function);GO:0005515(protein binding);GO:0005575(cellular_component);GO:0008150(biological_process)	04920(Adipocytokine signaling pathway)	K05872	NA
1	ENSDARG00000094366	si:dkey-260g12.1	2.3746	1.19406	0.991815	0.327	0.125	1.94849e-18	5.39966e-14	si:dkey-260g12.1 [Source:ZFIN;Acc:ZDB-GENE-100922-284]	GO:0005515(protein binding);GO:0016020(membrane);GO:0016021(integral component of membrane)	NA	NA	NA
1	ENSDARG00000043154	ucp2	8.57592	5.45918	0.651607	0.776	0.724	2.64499e-18	7.32979e-14	uncoupling protein 2 [Source:ZFIN;Acc:ZDB-GENE-990708-8]	GO:0006839(mitochondrial transport);GO:0016020(membrane);GO:0016021(integral component of membrane);GO:0022857(transmembrane transporter activity);GO:0031966(mitochondrial membrane);GO:0055085(transmembrane transport)	NA	K15103	NA
1	ENSDARG00000057787	itgae.2	1.29572	0.745394	0.797675	0.255	0.1	2.74996e-18	7.62069e-14	integrin, alpha E, tandem duplicate 2 [Source:ZFIN;Acc:ZDB-GENE-130530-671]	GO:0007155(cell adhesion);GO:0007229(integrin-mediated signaling pathway);GO:0008305(integrin complex);GO:0016020(membrane);GO:0016021(integral component of membrane)	04810(Regulation of actin cytoskeleton)	K06524	NA
1	ENSDARG00000023290	fabp3	5.07207	2.78741	0.86365	0.449	0.403	4.6959e-18	1.30133e-13	fatty acid binding protein 3, muscle and heart [Source:ZFIN;Acc:ZDB-GENE-020318-2]	GO:0001947(heart looping);GO:0007507(heart development);GO:0008289(lipid binding);GO:0043009(chordate embryonic development)	03320(PPAR signaling pathway)	K08752	NA
1	ENSDARG00000029524	impdh1b	1.41398	0.779675	0.858822	0.213	0.106	5.92841e-18	1.64288e-13	IMP (inosine 5'-monophosphate) dehydrogenase 1b [Source:ZFIN;Acc:ZDB-GENE-030219-206]	GO:0000166(nucleotide binding);GO:0003824(catalytic activity);GO:0003938(IMP dehydrogenase activity);GO:0005634(nucleus);GO:0005737(cytoplasm);GO:0006164(purine nucleotide biosynthetic process);GO:0006177(GMP biosynthetic process);GO:0006183(GTP biosynthetic process);GO:0016491(oxidoreductase activity);GO:0046872(metal ion binding);GO:0055114(oxidation-reduction process)	00230(Purine metabolism);00983(Drug metabolism - other enzymes)	K00088	EC:1.1.1.205
1	ENSDARG00000042332	plin2	3.2363	1.53097	1.0799	0.354	0.188	6.11996e-18	1.69596e-13	perilipin 2 [Source:ZFIN;Acc:ZDB-GENE-050913-12]	GO:0003674(molecular_function);GO:0005575(cellular_component);GO:0008150(biological_process)	03320(PPAR signaling pathway)	K17284	NA
1	ENSDARG00000079353	si:ch211-165d12.4	6.57173	3.20331	1.03671	0.464	0.229	6.33216e-18	1.75477e-13	si:ch211-165d12.4 [Source:ZFIN;Acc:ZDB-GENE-080303-7]	GO:0002250(adaptive immune response);GO:0016021(integral component of membrane);GO:0038023(signaling receptor activity)	00760(Nicotinate and nicotinamide metabolism)	K10524	2.7.1.173;EC:2.7.1.22
1	ENSDARG00000027222	adgrg1.1	1.66667	0.85113	0.969515	0.243	0.088	1.1885e-17	3.29356e-13	adhesion G protein-coupled receptor G1 [Source:ZFIN;Acc:ZDB-GENE-030131-3671]	GO:0004888(transmembrane signaling receptor activity);GO:0004930(G protein-coupled receptor activity);GO:0005887(integral component of plasma membrane);GO:0007166(cell surface receptor signaling pathway);GO:0007186(G protein-coupled receptor signaling pathway);GO:0007189(adenylate cyclase-activating G protein-coupled receptor signaling pathway);GO:0014003(oligodendrocyte development);GO:0016020(m…	NA	K08450	NA
1	ENSDARG00000055186	ccr9a	13.7347	7.37632	0.896852	0.73	0.559	2.48472e-17	6.88567e-13	chemokine (C-C motif) receptor 9a [Source:ZFIN;Acc:ZDB-GENE-060130-125]	GO:0004930(G protein-coupled receptor activity);GO:0004950(chemokine receptor activity);GO:0006935(chemotaxis);GO:0006955(immune response);GO:0007165(signal transduction);GO:0007186(G protein-coupled receptor signaling pathway);GO:0007204(positive regulation of cytosolic calcium ion concentration);GO:0009897(external side of plasma membrane);GO:0016020(membrane);GO:0016021(integral component of m…	04060(Cytokine-cytokine receptor interaction);04672(Intestinal immune network for IgA production)	K04184	NA
1	ENSDARG00000032619	tob1a	4.47545	2.59893	0.784113	0.551	0.422	2.64407e-17	7.32724e-13	transducer of ERBB2, 1a [Source:ZFIN;Acc:ZDB-GENE-031030-4]	GO:0003714(transcription corepressor activity);GO:0005515(protein binding);GO:0005634(nucleus);GO:0005737(cytoplasm);GO:0008285(negative regulation of cell population proliferation);GO:0009953(dorsal/ventral pattern formation);GO:0010468(regulation of gene expression);GO:0030509(BMP signaling pathway);GO:1903507(negative regulation of nucleic acid-templated transcription)	03018(RNA degradation)	K14443	NA
1	ENSDARG00000103980	ets2	6.08727	3.41539	0.833744	0.544	0.454	2.93603e-17	8.13633e-13	v-ets avian erythroblastosis virus E26 oncogene homolog 2 [Source:ZFIN;Acc:ZDB-GENE-050522-552]	GO:0000981(DNA-binding transcription factor activity, RNA polymerase II-specific);GO:0003677(DNA binding);GO:0003700(DNA-binding transcription factor activity);GO:0005634(nucleus);GO:0006355(regulation of transcription, DNA-templated);GO:0006357(regulation of transcription by RNA polymerase II);GO:0030154(cell differentiation);GO:0043565(sequence-specific DNA binding)	NA	K21932	NA
1	ENSDARG00000017653	rgs13	11.0992	6.06428	0.87205	0.73	0.59	4.00026e-17	1.10855e-12	regulator of G protein signaling 13 [Source:ZFIN;Acc:ZDB-GENE-070410-138]	NA	NA	K16449	NA
1	ENSDARG00000058348	scinlb	5.6782	3.18869	0.832471	0.616	0.441	5.09045e-17	1.41067e-12	scinderin like b [Source:ZFIN;Acc:ZDB-GENE-040426-2068]	GO:0005575(cellular_component);GO:0008150(biological_process);GO:0051015(actin filament binding)	04810(Regulation of actin cytoskeleton)	K05768	NA
1	ENSDARG00000102076	spink2.1	1.49524	0.782928	0.933422	0.236	0.072	7.6755e-17	2.12703e-12	serine peptidase inhibitor, Kazal type 2, tandem duplicate 1 [Source:ZFIN;Acc:ZDB-GENE-070112-972]	GO:0004867(serine-type endopeptidase inhibitor activity);GO:0005515(protein binding);GO:0010951(negative regulation of endopeptidase activity)	NA	NA	NA
1	ENSDARG00000096508	BX322618.1	3.5384	1.65672	1.09476	0.388	0.204	1.23594e-16	3.42504e-12	NA	NA	NA	NA	NA
1	ENSDARG00000090889	si:ch211-132p1.3	3.37118	2.01698	0.741056	0.441	0.358	2.44433e-16	6.77372e-12	si:ch211-132p1.3 [Source:ZFIN;Acc:ZDB-GENE-130530-1010]	NA	NA	NA	NA
1	ENSDARG00000042940	nab1a	7.17812	3.94924	0.862031	0.616	0.389	3.31568e-16	9.18842e-12	NGFI-A binding protein 1a (EGR1 binding protein 1) [Source:ZFIN;Acc:ZDB-GENE-050208-574]	GO:0005634(nucleus);GO:0006355(regulation of transcription, DNA-templated);GO:0045892(negative regulation of transcription, DNA-templated);GO:0140110(transcription regulator activity)	NA	K22388	NA
1	ENSDARG00000098108	dusp2	35.0847	24.6178	0.511138	0.905	0.728	4.33291e-16	1.20074e-11	dual specificity phosphatase 2 [Source:ZFIN;Acc:ZDB-GENE-040801-188]	GO:0000188(inactivation of MAPK activity);GO:0004721(phosphoprotein phosphatase activity);GO:0004725(protein tyrosine phosphatase activity);GO:0005634(nucleus);GO:0005737(cytoplasm);GO:0006470(protein dephosphorylation);GO:0008138(protein tyrosine/serine/threonine phosphatase activity);GO:0016311(dephosphorylation);GO:0016787(hydrolase activity);GO:0016791(phosphatase activity);GO:0017017(MAP kin…	04010(MAPK signaling pathway)	K04459	3.1.3.48;EC:3.1.3.16
1	ENSDARG00000097137	CR753876.1	10.7335	4.95921	1.11393	0.586	0.397	4.65777e-16	1.29076e-11	NA	NA	NA	NA	NA
1	ENSDARG00000045695	myca	3.91507	2.12957	0.878475	0.452	0.287	4.72584e-16	1.30962e-11	MYC proto-oncogene, bHLH transcription factor a [Source:ZFIN;Acc:ZDB-GENE-990415-162]	GO:0003677(DNA binding);GO:0003700(DNA-binding transcription factor activity);GO:0005634(nucleus);GO:0006355(regulation of transcription, DNA-templated);GO:0046983(protein dimerization activity)	NA	NA	NA
1	ENSDARG00000090728	tnfrsf9b	12.7442	7.56056	0.753274	0.764	0.561	4.90237e-16	1.35854e-11	tumor necrosis factor receptor superfamily, member 9b [Source:ZFIN;Acc:ZDB-GENE-101109-2]	GO:0005515(protein binding);GO:0016020(membrane);GO:0016021(integral component of membrane)	04060(Cytokine-cytokine receptor interaction)	K05146	NA
1	ENSDARG00000022280	brd2a	12.2223	7.71941	0.662954	0.852	0.803	5.30524e-16	1.47019e-11	bromodomain containing 2a [Source:ZFIN;Acc:ZDB-GENE-990415-248]	GO:0002574(thrombocyte differentiation);GO:0003674(molecular_function);GO:0005515(protein binding);GO:0005575(cellular_component);GO:0021510(spinal cord development);GO:0030902(hindbrain development);GO:0030917(midbrain-hindbrain boundary development);GO:0042981(regulation of apoptotic process)	NA	K08871	NA
1	ENSDARG00000075720	il2rb	4.5329	2.3198	0.966435	0.49	0.261	9.61386e-16	2.66419e-11	interleukin 2 receptor, beta [Source:ZFIN;Acc:ZDB-GENE-080108-2]	GO:0004896(cytokine receptor activity);GO:0005515(protein binding);GO:0016020(membrane);GO:0016021(integral component of membrane);GO:0019221(cytokine-mediated signaling pathway)	04060(Cytokine-cytokine receptor interaction);04144(Endocytosis)	K05069	NA
1	ENSDARG00000043243	prkchb	1.15864	0.658473	0.815232	0.194	0.065	9.77302e-16	2.7083e-11	protein kinase C, eta, b [Source:ZFIN;Acc:ZDB-GENE-041001-104]	GO:0000166(nucleotide binding);GO:0004672(protein kinase activity);GO:0004674(protein serine/threonine kinase activity);GO:0004697(protein kinase C activity);GO:0005524(ATP binding);GO:0006468(protein phosphorylation);GO:0016301(kinase activity);GO:0016310(phosphorylation);GO:0016740(transferase activity);GO:0018105(peptidyl-serine phosphorylation);GO:0035556(intracellular signal transduction);GO…	NA	NA	NA
1	ENSDARG00000010844	kras	2.33484	1.38524	0.753189	0.331	0.259	1.27459e-15	3.53215e-11	v-Ki-ras2 Kirsten rat sarcoma viral oncogene homolog [Source:ZFIN;Acc:ZDB-GENE-040808-67]	GO:0000166(nucleotide binding);GO:0003924(GTPase activity);GO:0005525(GTP binding);GO:0007165(signal transduction);GO:0007507(heart development);GO:0016020(membrane);GO:0030097(hemopoiesis);GO:0048701(embryonic cranial skeleton morphogenesis)	04010(MAPK signaling pathway);04012(ErbB signaling pathway);04068(FoxO signaling pathway);04137(Mitophagy - animal);04140(Autophagy - animal);04150(mTOR signaling pathway);04210(Apoptosis);04218(Cellular senescence);04370(VEGF signaling pathway);04371(Apelin signaling pathway);04540(Gap junction);04625(C-type lectin receptor signaling pathway);04810(Regulation of actin cytoskeleton);04910(Insulin…	K07827	NA
1	ENSDARG00000016154	zfp36l1a	4.428	2.47475	0.839369	0.494	0.366	1.31395e-15	3.6412e-11	zinc finger protein 36, C3H type-like 1a [Source:ZFIN;Acc:ZDB-GENE-030131-9860]	GO:0003730(mRNA 3'-UTR binding);GO:0005829(cytosol);GO:0046872(metal ion binding);GO:0061158(3'-UTR-mediated mRNA destabilization)	04218(Cellular senescence)	K18753	NA
1	ENSDARG00000015164	mknk2b	6.61428	3.86824	0.773908	0.608	0.523	1.49535e-15	4.14391e-11	MAP kinase interacting serine/threonine kinase 2b [Source:ZFIN;Acc:ZDB-GENE-030829-2]	GO:0000166(nucleotide binding);GO:0004672(protein kinase activity);GO:0004674(protein serine/threonine kinase activity);GO:0004683(calmodulin-dependent protein kinase activity);GO:0005516(calmodulin binding);GO:0005524(ATP binding);GO:0005634(nucleus);GO:0005737(cytoplasm);GO:0006468(protein phosphorylation);GO:0009931(calcium-dependent protein serine/threonine kinase activity);GO:0018105(peptidy…	04010(MAPK signaling pathway);04910(Insulin signaling pathway)	K04372	EC:2.7.11.1
1	ENSDARG00000015887	b2ml	28.9547	20.3096	0.511635	0.992	0.976	1.64413e-15	4.55623e-11	beta-2-microglobulin, like [Source:ZFIN;Acc:ZDB-GENE-040426-2136]	GO:0002376(immune system process);GO:0002474(antigen processing and presentation of peptide antigen via MHC class I);GO:0005576(extracellular region);GO:0006955(immune response);GO:0042612(MHC class I protein complex)	05168(Herpes simplex virus 1 infection)	K08055	NA
1	ENSDARG00000059054	pdk2b	1.5008	0.762595	0.976743	0.186	0.081	2.76995e-15	7.67607e-11	pyruvate dehydrogenase kinase, isozyme 2b [Source:ZFIN;Acc:ZDB-GENE-040426-939]	GO:0004672(protein kinase activity);GO:0005575(cellular_component);GO:0006468(protein phosphorylation)	NA	K00898	EC:2.7.11.2
1	ENSDARG00000062855	plekhg7	1.21076	0.684702	0.822359	0.175	0.062	3.76015e-15	1.04201e-10	pleckstrin homology domain containing, family G (with RhoGef domain) member 7 [Source:ZFIN;Acc:ZDB-GENE-070410-15]	GO:0005089(Rho guanyl-nucleotide exchange factor activity);GO:0035023(regulation of Rho protein signal transduction)	NA	NA	NA
1	ENSDARG00000040988	tpi1b	7.02827	4.67018	0.58969	0.764	0.675	5.04651e-15	1.39849e-10	triosephosphate isomerase 1b [Source:ZFIN;Acc:ZDB-GENE-020416-4]	GO:0003824(catalytic activity);GO:0004807(triose-phosphate isomerase activity);GO:0006094(gluconeogenesis);GO:0006096(glycolytic process);GO:0016853(isomerase activity)	00010(Glycolysis / Gluconeogenesis);00051(Fructose and mannose metabolism);00562(Inositol phosphate metabolism)	K01803	EC:5.3.1.1
1	ENSDARG00000060248	fgd4b	1.43983	0.842958	0.772366	0.247	0.114	1.50465e-14	4.1697e-10	FYVE, RhoGEF and PH domain containing 4b [Source:ZFIN;Acc:ZDB-GENE-110421-6]	GO:0005089(Rho guanyl-nucleotide exchange factor activity);GO:0035023(regulation of Rho protein signal transduction);GO:0046872(metal ion binding)	NA	K05723	NA
1	ENSDARG00000037559	uba1	1.92386	1.40019	0.458385	0.3	0.306	1.51834e-14	4.20763e-10	ubiquitin-like modifier activating enzyme 1 [Source:ZFIN;Acc:ZDB-GENE-040426-2009]	GO:0000166(nucleotide binding);GO:0004839(ubiquitin activating enzyme activity);GO:0005524(ATP binding);GO:0005634(nucleus);GO:0005737(cytoplasm);GO:0006464(cellular protein modification process);GO:0006974(cellular response to DNA damage stimulus);GO:0007409(axonogenesis);GO:0008641(ubiquitin-like modifier activating enzyme activity);GO:0016567(protein ubiquitination);GO:0016874(ligase activity)…	04120(Ubiquitin mediated proteolysis)	K03178	EC:6.2.1.45
1	ENSDARG00000011564	sfpq	1.97076	1.48383	0.409427	0.312	0.327	2.26455e-14	6.27552e-10	splicing factor proline/glutamine-rich [Source:ZFIN;Acc:ZDB-GENE-040426-2452]	GO:0000976(transcription regulatory region sequence-specific DNA binding);GO:0003676(nucleic acid binding);GO:0003723(RNA binding);GO:0005634(nucleus);GO:0007420(brain development);GO:0016020(membrane);GO:0016021(integral component of membrane);GO:0021522(spinal cord motor neuron differentiation);GO:0021547(midbrain-hindbrain boundary initiation);GO:0021591(ventricular system development);GO:0021…	NA	K13219	NA
1	ENSDARG00000009505	prelid3b	7.63866	5.50844	0.471675	0.764	0.75	3.57679e-14	9.912e-10	PRELI domain containing 3 [Source:ZFIN;Acc:ZDB-GENE-031002-13]	GO:0005758(mitochondrial intermembrane space);GO:0015914(phospholipid transport);GO:1990050(phosphatidic acid transporter activity)	NA	NA	NA
1	ENSDARG00000025091	ezrb	3.53348	2.19879	0.684383	0.471	0.393	4.79318e-14	1.32828e-09	ezrin b [Source:ZFIN;Acc:ZDB-GENE-050803-1]	GO:0003779(actin binding);GO:0005856(cytoskeleton);GO:0008092(cytoskeletal protein binding);GO:0035850(epithelial cell differentiation involved in kidney development);GO:0042074(cell migration involved in gastrulation);GO:0060271(cilium assembly);GO:0090504(epiboly);GO:1902017(regulation of cilium assembly)	04530(Tight junction);04810(Regulation of actin cytoskeleton)	K08007	NA
1	ENSDARG00000068996	hist2h2l	1.75646	0.989645	0.82769	0.247	0.153	6.20621e-14	1.71987e-09	histone 2, H2, like [Source:ZFIN;Acc:ZDB-GENE-031118-36]	GO:0000786(nucleosome);GO:0000790(nuclear chromatin);GO:0003677(DNA binding);GO:0005634(nucleus);GO:0005694(chromosome);GO:0006334(nucleosome assembly);GO:0046982(protein heterodimerization activity)	NA	K11252	NA
1	ENSDARG00000054271	cdkn1bb	4.40739	3.07104	0.521199	0.529	0.53	8.91172e-14	2.46962e-09	cyclin-dependent kinase inhibitor 1Bb [Source:ZFIN;Acc:ZDB-GENE-030521-13]	GO:0000082(G1/S transition of mitotic cell cycle);GO:0004861(cyclin-dependent protein serine/threonine kinase inhibitor activity);GO:0005634(nucleus);GO:0005737(cytoplasm);GO:0007050(cell cycle arrest);GO:0008285(negative regulation of cell population proliferation);GO:0016301(kinase activity);GO:0016310(phosphorylation);GO:0042127(regulation of cell population proliferation);GO:0042326(negative …	04012(ErbB signaling pathway);04068(FoxO signaling pathway);04110(Cell cycle);04933(AGE-RAGE signaling pathway in diabetic complications)	K06624	NA
1	ENSDARG00000089372	clk4a	2.01181	1.57771	0.350659	0.342	0.343	1.01381e-13	2.80947e-09	CDC-like kinase 4a [Source:ZFIN;Acc:ZDB-GENE-030131-576]	GO:0000166(nucleotide binding);GO:0004672(protein kinase activity);GO:0004674(protein serine/threonine kinase activity);GO:0005524(ATP binding);GO:0006468(protein phosphorylation)	NA	K08823	EC:2.7.12.1
1	ENSDARG00000056346	acap1	1.59977	1.04759	0.610794	0.27	0.193	1.17351e-13	3.25204e-09	ArfGAP with coiled-coil, ankyrin repeat and PH domains 1 [Source:ZFIN;Acc:ZDB-GENE-070112-1242]	GO:0005096(GTPase activator activity);GO:0005515(protein binding);GO:0043547(positive regulation of GTPase activity);GO:0046872(metal ion binding)	04144(Endocytosis)	K12489	NA
1	ENSDARG00000074806	afap1l2	0.743399	0.467972	0.667714	0.137	0.022	1.70784e-13	4.73278e-09	actin filament associated protein 1-like 2 [Source:ZFIN;Acc:ZDB-GENE-100318-1]	GO:0005737(cytoplasm);GO:0009966(regulation of signal transduction);GO:0009967(positive regulation of signal transduction);GO:0035591(signaling adaptor activity)	NA	NA	NA
1	ENSDARG00000021372	tob1b	4.31409	2.71555	0.667812	0.487	0.426	2.05657e-13	5.69915e-09	transducer of ERBB2, 1b [Source:ZFIN;Acc:ZDB-GENE-040426-2151]	GO:0003714(transcription corepressor activity);GO:0005634(nucleus);GO:0005737(cytoplasm);GO:0008285(negative regulation of cell population proliferation);GO:0010468(regulation of gene expression);GO:1903507(negative regulation of nucleic acid-templated transcription)	03018(RNA degradation)	K14443	NA
1	ENSDARG00000088040	si:dkeyp-27c8.2	2.41215	1.79388	0.427233	0.274	0.338	2.5837e-13	7.15995e-09	si:dkeyp-27c8.2 [Source:ZFIN;Acc:ZDB-GENE-090311-51]	GO:0016311(dephosphorylation);GO:0016791(phosphatase activity)	NA	K17619	3.1.3.-;EC:3.1.3.48
1	ENSDARG00000103846	hspa5	3.98394	2.62633	0.601147	0.411	0.43	3.4846e-13	9.65651e-09	heat shock protein 5 [Source:ZFIN;Acc:ZDB-GENE-031001-11]	GO:0000166(nucleotide binding);GO:0001666(response to hypoxia);GO:0001878(response to yeast);GO:0005524(ATP binding);GO:0005576(extracellular region);GO:0005634(nucleus);GO:0005737(cytoplasm);GO:0005788(endoplasmic reticulum lumen);GO:0006986(response to unfolded protein);GO:0016020(membrane);GO:0016887(ATPase activity);GO:0030433(ubiquitin-dependent ERAD pathway);GO:0030968(endoplasmic reticulum…	03060(Protein export);04141(Protein processing in endoplasmic reticulum)	K09490	NA
1	ENSDARG00000086288	scg3	0.945305	0.548191	0.786101	0.118	0.029	4.11253e-13	1.13966e-08	secretogranin III [Source:ZFIN;Acc:ZDB-GENE-040426-1725]	GO:0005576(extracellular region);GO:0016020(membrane);GO:0030658(transport vesicle membrane);GO:0031410(cytoplasmic vesicle)	NA	NA	NA
1	ENSDARG00000020893	slc25a55a	4.12169	3.16439	0.381305	0.551	0.562	5.26226e-13	1.45828e-08	solute carrier family 25, member 55a [Source:ZFIN;Acc:ZDB-GENE-040426-2745]	GO:0005313(L-glutamate transmembrane transporter activity);GO:0005743(mitochondrial inner membrane);GO:0015183(L-aspartate transmembrane transporter activity);GO:0015810(aspartate transmembrane transport);GO:0015813(L-glutamate transmembrane transport);GO:0016020(membrane);GO:0016021(integral component of membrane);GO:0022857(transmembrane transporter activity);GO:0043490(malate-aspartate shuttle…	NA	K15107	NA
1	ENSDARG00000032327	usp36	1.47721	1.21941	0.276697	0.251	0.294	5.72581e-13	1.58674e-08	ubiquitin specific peptidase 36 [Source:ZFIN;Acc:ZDB-GENE-030131-5450]	GO:0004197(cysteine-type endopeptidase activity);GO:0004843(thiol-dependent ubiquitin-specific protease activity);GO:0006511(ubiquitin-dependent protein catabolic process);GO:0016579(protein deubiquitination);GO:0036459(thiol-dependent ubiquitinyl hydrolase activity);GO:0042981(regulation of apoptotic process);GO:1904888(cranial skeletal system development)	NA	K11855	EC:3.4.19.12
1	ENSDARG00000074283	inpp5d	1.4841	0.900735	0.720419	0.221	0.139	6.13742e-13	1.7008e-08	inositol polyphosphate-5-phosphatase D [Source:ZFIN;Acc:ZDB-GENE-100922-30]	GO:0016787(hydrolase activity);GO:0046856(phosphatidylinositol dephosphorylation);GO:0090024(negative regulation of neutrophil chemotaxis)	00562(Inositol phosphate metabolism);04070(Phosphatidylinositol signaling system)	K03084	EC:3.1.3.86
1	ENSDARG00000094295	CR855337.1	3.27282	1.91941	0.769875	0.411	0.303	7.60328e-13	2.10702e-08	KIAA0040 ortholog [Source:NCBI gene;Acc:100536987]	NA	NA	NA	NA
1	ENSDARG00000086842	dap1b	4.55501	2.79683	0.703661	0.559	0.443	8.37519e-13	2.32093e-08	death associated protein 1b [Source:ZFIN;Acc:ZDB-GENE-000511-4]	GO:0010507(negative regulation of autophagy);GO:0034198(cellular response to amino acid starvation);GO:0070513(death domain binding);GO:0097190(apoptotic signaling pathway)	NA	NA	NA
1	ENSDARG00000020625	jak1	5.69018	4.64957	0.291377	0.586	0.691	8.92301e-13	2.47274e-08	Janus kinase 1 [Source:ZFIN;Acc:ZDB-GENE-980526-142]	GO:0000166(nucleotide binding);GO:0004672(protein kinase activity);GO:0004713(protein tyrosine kinase activity);GO:0004715(non-membrane spanning protein tyrosine kinase activity);GO:0005524(ATP binding);GO:0005856(cytoskeleton);GO:0006468(protein phosphorylation);GO:0016020(membrane);GO:0016301(kinase activity);GO:0016310(phosphorylation);GO:0016740(transferase activity);GO:0018108(peptidyl-tyros…	04217(Necroptosis);04621(NOD-like receptor signaling pathway);05168(Herpes simplex virus 1 infection)	K11217	EC:2.7.10.2
1	ENSDARG00000042708	tuba8l	4.13447	3.00858	0.45862	0.54	0.496	1.08104e-12	2.99578e-08	tubulin, alpha 8 like [Source:ZFIN;Acc:ZDB-GENE-030131-9167]	GO:0000166(nucleotide binding);GO:0000226(microtubule cytoskeleton organization);GO:0000278(mitotic cell cycle);GO:0003924(GTPase activity);GO:0005200(structural constituent of cytoskeleton);GO:0005525(GTP binding);GO:0005737(cytoplasm);GO:0005856(cytoskeleton);GO:0005874(microtubule);GO:0007017(microtubule-based process)	04145(Phagosome);04210(Apoptosis);04530(Tight junction);04540(Gap junction)	K07374	NA
1	ENSDARG00000099966	polr2a	3.47097	2.39984	0.532402	0.449	0.445	1.21607e-12	3.36997e-08	polymerase (RNA) II (DNA directed) polypeptide A [Source:ZFIN;Acc:ZDB-GENE-041008-78]	GO:0001055(RNA polymerase II activity);GO:0003677(DNA binding);GO:0003899(DNA-directed 5'-3' RNA polymerase activity);GO:0005665(RNA polymerase II, core complex);GO:0006351(transcription, DNA-templated);GO:0006366(transcription by RNA polymerase II);GO:0016740(transferase activity);GO:0016779(nucleotidyltransferase activity)	03020(RNA polymerase)	K03006	EC:2.7.7.6
1	ENSDARG00000051836	si:dkeyp-19e1.3	2.58911	1.61124	0.68428	0.411	0.28	1.22681e-12	3.39973e-08	si:dkeyp-19e1.3 [Source:ZFIN;Acc:ZDB-GENE-081104-56]	GO:0005096(GTPase activator activity);GO:0005623(cell);GO:0006886(intracellular protein transport);GO:0017137(Rab GTPase binding);GO:0090630(activation of GTPase activity)	NA	K20133	NA
1	ENSDARG00000102912	gpr184	2.90446	1.65685	0.809825	0.376	0.22	1.89321e-12	5.24645e-08	G protein-coupled receptor 184 [Source:ZFIN;Acc:ZDB-GENE-060929-1218]	GO:0004930(G protein-coupled receptor activity);GO:0005887(integral component of plasma membrane);GO:0007165(signal transduction);GO:0007186(G protein-coupled receptor signaling pathway);GO:0016020(membrane);GO:0016021(integral component of membrane);GO:0035025(positive regulation of Rho protein signal transduction);GO:0051482(positive regulation of cytosolic calcium ion concentration involved in…	NA	NA	NA
1	ENSDARG00000055955	lcp2a	3.70531	2.42916	0.609138	0.464	0.391	2.40725e-12	6.67097e-08	lymphocyte cytosolic protein 2a [Source:ZFIN;Acc:ZDB-GENE-041114-97]	GO:0005515(protein binding);GO:0007169(transmembrane receptor protein tyrosine kinase signaling pathway);GO:0035556(intracellular signal transduction)	NA	NA	NA
1	ENSDARG00000031164	tuba8l2	1.29722	0.801236	0.695128	0.24	0.109	2.42074e-12	6.70835e-08	tubulin, alpha 8 like 2 [Source:ZFIN;Acc:ZDB-GENE-040426-1646]	GO:0000166(nucleotide binding);GO:0000226(microtubule cytoskeleton organization);GO:0000278(mitotic cell cycle);GO:0003924(GTPase activity);GO:0005200(structural constituent of cytoskeleton);GO:0005525(GTP binding);GO:0005737(cytoplasm);GO:0005856(cytoskeleton);GO:0005874(microtubule);GO:0007017(microtubule-based process)	04145(Phagosome);04210(Apoptosis);04530(Tight junction);04540(Gap junction)	K07374	NA
1	ENSDARG00000103002	nptna	1.32323	0.770252	0.78066	0.198	0.081	3.70856e-12	1.02772e-07	neuroplastin a [Source:ZFIN;Acc:ZDB-GENE-030804-7]	GO:0005886(plasma membrane);GO:0007156(homophilic cell adhesion via plasma membrane adhesion molecules);GO:0007411(axon guidance);GO:0016020(membrane);GO:0016021(integral component of membrane);GO:0030424(axon);GO:0048545(response to steroid hormone);GO:0070593(dendrite self-avoidance);GO:0098632(cell-cell adhesion mediator activity)	NA	K22653	NA
1	ENSDARG00000062469	hipk3a	1.23917	0.847165	0.548658	0.228	0.171	4.19907e-12	1.16365e-07	homeodomain interacting protein kinase 3a [Source:ZFIN;Acc:ZDB-GENE-061207-54]	GO:0004672(protein kinase activity);GO:0005524(ATP binding);GO:0006468(protein phosphorylation);GO:0071466(cellular response to xenobiotic stimulus)	04218(Cellular senescence)	K08826	EC:2.7.11.1
1	ENSDARG00000045661	irf7	4.12931	2.60473	0.664769	0.468	0.382	7.83532e-12	2.17132e-07	interferon regulatory factor 7 [Source:ZFIN;Acc:ZDB-GENE-040426-1518]	GO:0000981(DNA-binding transcription factor activity, RNA polymerase II-specific);GO:0002376(immune system process);GO:0003700(DNA-binding transcription factor activity);GO:0005515(protein binding);GO:0005634(nucleus);GO:0006355(regulation of transcription, DNA-templated);GO:0006357(regulation of transcription by RNA polymerase II);GO:0009615(response to virus);GO:0030097(hemopoiesis);GO:0044212(…	04620(Toll-like receptor signaling pathway);04621(NOD-like receptor signaling pathway);04622(RIG-I-like receptor signaling pathway);04623(Cytosolic DNA-sensing pathway);05168(Herpes simplex virus 1 infection)	K09447	NA
1	ENSDARG00000102802	brdt	3.48155	2.16249	0.687037	0.449	0.38	9.23836e-12	2.56014e-07	bromodomain, testis-specific [Source:ZFIN;Acc:ZDB-GENE-030131-5928]	GO:0005515(protein binding)	NA	K11724	NA
1	ENSDARG00000041917	ccl38a.4	3.87785	1.00872	1.94273	0.11	0.024	1.53865e-11	4.26392e-07	chemokine (C-C motif) ligand 38, duplicate 4 [Source:ZFIN;Acc:ZDB-GENE-041014-163]	GO:0005125(cytokine activity);GO:0005576(extracellular region);GO:0005615(extracellular space);GO:0006935(chemotaxis);GO:0006955(immune response);GO:0008009(chemokine activity);GO:0010469(regulation of signaling receptor activity);GO:0060326(cell chemotaxis)	NA	NA	NA
1	ENSDARG00000040623	fosl2	7.56118	5.69749	0.408284	0.684	0.682	1.56965e-11	4.3498e-07	fos-like antigen 2 [Source:ZFIN;Acc:ZDB-GENE-070209-164]	GO:0000978(RNA polymerase II proximal promoter sequence-specific DNA binding);GO:0003677(DNA binding);GO:0003700(DNA-binding transcription factor activity);GO:0005634(nucleus);GO:0006355(regulation of transcription, DNA-templated);GO:0006357(regulation of transcription by RNA polymerase II);GO:2000690(regulation of cardiac muscle cell myoblast differentiation)	NA	K09030	NA
1	ENSDARG00000093406	zgc:111986	2.12379	1.77176	0.261459	0.327	0.392	1.63063e-11	4.5188e-07	zgc:111986 [Source:ZFIN;Acc:ZDB-GENE-050522-304]	GO:0003674(molecular_function);GO:0008150(biological_process)	NA	NA	NA
1	ENSDARG00000102744	mgst3a	0.826506	0.574547	0.524599	0.183	0.088	2.00782e-11	5.56407e-07	microsomal glutathione S-transferase 3a [Source:ZFIN;Acc:ZDB-GENE-040426-2767]	GO:0004364(glutathione transferase activity);GO:0004602(glutathione peroxidase activity);GO:0005635(nuclear envelope);GO:0005783(endoplasmic reticulum);GO:0016020(membrane);GO:0016021(integral component of membrane);GO:0098869(cellular oxidant detoxification)	00480(Glutathione metabolism);00980(Metabolism of xenobiotics by cytochrome P450);00982(Drug metabolism - cytochrome P450);00983(Drug metabolism - other enzymes)	K00799	EC:2.5.1.18
1	ENSDARG00000093602	si:ch211-93g21.1	0.780036	0.521379	0.581209	0.148	0.039	2.0079e-11	5.56428e-07	si:ch211-93g21.1 [Source:ZFIN;Acc:ZDB-GENE-060503-703]	GO:0016020(membrane);GO:0016021(integral component of membrane)	NA	NA	NA
1	ENSDARG00000026350	wasb	8.29052	6.00423	0.465483	0.787	0.731	2.21336e-11	6.13365e-07	Wiskott-Aldrich syndrome (eczema-thrombocytopenia) b [Source:ZFIN;Acc:ZDB-GENE-030131-7098]	GO:0000147(actin cortical patch assembly);GO:0003779(actin binding);GO:0005884(actin filament);GO:0006897(endocytosis);GO:0007015(actin filament organization);GO:0030048(actin filament-based movement);GO:0030479(actin cortical patch);GO:0030593(neutrophil chemotaxis);GO:0030595(leukocyte chemotaxis);GO:0048246(macrophage chemotaxis);GO:0051015(actin filament binding);GO:0051127(positive regulatio…	04144(Endocytosis);04520(Adherens junction);04530(Tight junction);04810(Regulation of actin cytoskeleton);05132(Salmonella infection)	K05747	NA
1	ENSDARG00000095351	CU914776.1	2.9795	1.54654	0.946021	0.319	0.173	2.31388e-11	6.41223e-07	NA	NA	NA	NA	NA
1	ENSDARG00000039269	arg2	4.69914	2.6138	0.846249	0.338	0.33	3.26311e-11	9.04272e-07	arginase 2 [Source:ZFIN;Acc:ZDB-GENE-030131-1334]	GO:0000050(urea cycle);GO:0004053(arginase activity);GO:0005737(cytoplasm);GO:0006525(arginine metabolic process);GO:0016787(hydrolase activity);GO:0016813(hydrolase activity, acting on carbon-nitrogen (but not peptide) bonds, in linear amidines);GO:0019547(arginine catabolic process to ornithine);GO:0030145(manganese ion binding);GO:0046872(metal ion binding)	00220(Arginine biosynthesis);00330(Arginine and proline metabolism)	K01476	EC:3.5.3.1
1	ENSDARG00000079167	si:ch211-230g15.5	1.17664	0.695646	0.758244	0.183	0.064	3.55198e-11	9.84325e-07	si:ch211-230g15.5 [Source:ZFIN;Acc:ZDB-GENE-091204-280]	GO:0005515(protein binding)	NA	NA	NA
1	ENSDARG00000023472	ctnnb2	4.87541	3.0736	0.665595	0.57	0.456	3.81083e-11	1.05606e-06	catenin, beta 2 [Source:ZFIN;Acc:ZDB-GENE-040426-2575]	GO:0003713(transcription coactivator activity);GO:0005515(protein binding);GO:0005634(nucleus);GO:0005913(cell-cell adherens junction);GO:0007155(cell adhesion);GO:0009950(dorsal/ventral axis specification);GO:0009953(dorsal/ventral pattern formation);GO:0016342(catenin complex);GO:0019903(protein phosphatase binding);GO:0035257(nuclear hormone receptor binding);GO:0045294(alpha-catenin binding);…	NA	NA	NA
1		NC-002333.17	75.3832	56.7307	0.410115	0.989	0.982	4.50343e-11	1.24799e-06	NA	NA	NA	NA	NA
1	ENSDARG00000101828	si:dkey-16p6.1.17	2.17564	1.51257	0.524433	0.369	0.293	5.84005e-11	1.61839e-06	si:dkey-16p6.1 [Source:ZFIN;Acc:ZDB-GENE-081103-43]	GO:0000166(nucleotide binding);GO:0005515(protein binding);GO:0005524(ATP binding)	NA	NA	NA
1	ENSDARG00000068995	h2afx1	4.45157	3.14625	0.500683	0.589	0.525	5.84187e-11	1.6189e-06	H2A histone family member X1 [Source:ZFIN;Acc:ZDB-GENE-041010-42]	GO:0000786(nucleosome);GO:0000790(nuclear chromatin);GO:0003677(DNA binding);GO:0005615(extracellular space);GO:0005634(nucleus);GO:0005694(chromosome);GO:0006325(chromatin organization);GO:0045087(innate immune response);GO:0046982(protein heterodimerization activity);GO:0050830(defense response to Gram-positive bacterium);GO:0051673(membrane disruption in other organism)	04217(Necroptosis)	K11251	NA
1	ENSDARG00000018425	ddx61	3.15281	2.55416	0.30379	0.502	0.527	6.43054e-11	1.78203e-06	DEAD (Asp-Glu-Ala-Asp) box helicase 61 [Source:ZFIN;Acc:ZDB-GENE-030131-6611]	GO:0000166(nucleotide binding);GO:0003676(nucleic acid binding);GO:0004386(helicase activity);GO:0005524(ATP binding);GO:0009408(response to heat);GO:0016787(hydrolase activity);GO:0034063(stress granule assembly);GO:0036464(cytoplasmic ribonucleoprotein granule)	03018(RNA degradation)	K12614	EC:3.6.4.13
1	ENSDARG00000042796	yy1a	1.03773	0.816064	0.346677	0.179	0.189	6.79227e-11	1.88227e-06	YY1 transcription factor a [Source:ZFIN;Acc:ZDB-GENE-030131-1117]	GO:0000790(nuclear chromatin);GO:0000978(RNA polymerase II proximal promoter sequence-specific DNA binding);GO:0000980(RNA polymerase II distal enhancer sequence-specific DNA binding);GO:0001525(angiogenesis);GO:0003676(nucleic acid binding);GO:0003677(DNA binding);GO:0005515(protein binding);GO:0005634(nucleus);GO:0005667(transcription factor complex);GO:0007420(brain development);GO:0007507(hea…	NA	K09201	NA
1	ENSDARG00000057782	baz2ba	1.25947	1.01362	0.313297	0.213	0.233	8.39612e-11	2.32673e-06	bromodomain adjacent to zinc finger domain, 2Ba [Source:ZFIN;Acc:ZDB-GENE-070615-37]	GO:0003677(DNA binding);GO:0005515(protein binding);GO:0005634(nucleus);GO:0046872(metal ion binding)	NA	NA	NA
1	ENSDARG00000036161	hnrnpa0l.1	21.149	16.2048	0.38417	0.954	0.947	8.58642e-11	2.37947e-06	heterogeneous nuclear ribonucleoprotein A0, like [Source:ZFIN;Acc:ZDB-GENE-030131-618]	GO:0003676(nucleic acid binding);GO:0003723(RNA binding)	NA	NA	NA
1	ENSDARG00000068233	zgc:64051	9.16846	7.11532	0.36575	0.817	0.819	8.62562e-11	2.39033e-06	zgc:64051 [Source:ZFIN;Acc:ZDB-GENE-040426-1349]	GO:0003674(molecular_function);GO:0005887(integral component of plasma membrane);GO:0007166(cell surface receptor signaling pathway);GO:0016020(membrane);GO:0016021(integral component of membrane)	NA	K06489	NA
1	ENSDARG00000089933	rasal3	1.46323	1.01225	0.53159	0.27	0.202	9.35365e-11	2.59208e-06	RAS protein activator like 3 [Source:ZFIN;Acc:ZDB-GENE-101130-3]	GO:0007165(signal transduction);GO:0043087(regulation of GTPase activity)	NA	NA	NA
1	ENSDARG00000012458	zgc:77849	2.36283	1.88218	0.328115	0.399	0.413	1.04739e-10	2.90254e-06	zgc:77849 [Source:ZFIN;Acc:ZDB-GENE-030131-1107]	NA	NA	NA	NA
1	ENSDARG00000038900	acadm	1.0935	0.76223	0.52065	0.202	0.15	1.11008e-10	3.07625e-06	acyl-CoA dehydrogenase medium chain [Source:ZFIN;Acc:ZDB-GENE-040426-1945]	GO:0003995(acyl-CoA dehydrogenase activity);GO:0005739(mitochondrion);GO:0006635(fatty acid beta-oxidation);GO:0016491(oxidoreductase activity);GO:0016627(oxidoreductase activity, acting on the CH-CH group of donors);GO:0050660(flavin adenine dinucleotide binding);GO:0051793(medium-chain fatty acid catabolic process);GO:0055114(oxidation-reduction process);GO:0070991(medium-chain-acyl-CoA dehydro…	00071(Fatty acid degradation);00280(Valine, leucine and isoleucine degradation);00410(beta-Alanine metabolism);00640(Propanoate metabolism);03320(PPAR signaling pathway)	K00249	EC:1.3.8.7
1	ENSDARG00000038442	plcg1	1.39182	0.923374	0.591984	0.228	0.158	1.11677e-10	3.09478e-06	phospholipase C, gamma 1 [Source:ZFIN;Acc:ZDB-GENE-030421-3]	GO:0001525(angiogenesis);GO:0001570(vasculogenesis);GO:0004435(phosphatidylinositol phospholipase C activity);GO:0005515(protein binding);GO:0005886(plasma membrane);GO:0006629(lipid metabolic process);GO:0007165(signal transduction);GO:0008016(regulation of heart contraction);GO:0008081(phosphoric diester hydrolase activity);GO:0010634(positive regulation of epithelial cell migration);GO:0016042…	00562(Inositol phosphate metabolism);04012(ErbB signaling pathway);04020(Calcium signaling pathway);04070(Phosphatidylinositol signaling system);04370(VEGF signaling pathway);04933(AGE-RAGE signaling pathway in diabetic complications)	K01116	EC:3.1.4.11
1	ENSDARG00000052419	ankrd12	2.88989	2.06042	0.488078	0.418	0.383	1.11903e-10	3.10104e-06	ankyrin repeat domain 12 [Source:ZFIN;Acc:ZDB-GENE-040426-846]	GO:0003674(molecular_function);GO:0005515(protein binding);GO:0005575(cellular_component);GO:0008150(biological_process)	NA	K21436	NA
1	ENSDARG00000079175	si:ch211-79k12.1	2.97376	1.93703	0.618441	0.403	0.278	1.17312e-10	3.25094e-06	si:ch211-79k12.1 [Source:ZFIN;Acc:ZDB-GENE-080303-9]	GO:0016020(membrane);GO:0016021(integral component of membrane)	NA	NA	NA
1	ENSDARG00000088283	si:ch73-248e21.5	2.37575	1.83772	0.370466	0.376	0.358	1.3317e-10	3.6904e-06	si:ch73-248e21.5 [Source:ZFIN;Acc:ZDB-GENE-120215-255]	GO:0016020(membrane);GO:0016021(integral component of membrane)	NA	NA	NA
1	ENSDARG00000060977	zgc:153018	3.82011	1.91437	0.996744	0.338	0.208	1.34264e-10	3.72073e-06	zgc:153018 [Source:ZFIN;Acc:ZDB-GENE-060929-752]	GO:0003674(molecular_function);GO:0008150(biological_process);GO:0016020(membrane);GO:0016021(integral component of membrane)	NA	NA	NA
1	ENSDARG00000029072	klf6a	7.67981	5.16268	0.57295	0.677	0.607	1.37064e-10	3.79833e-06	Kruppel-like factor 6a [Source:ZFIN;Acc:ZDB-GENE-021115-9]	GO:0000122(negative regulation of transcription by RNA polymerase II);GO:0000785(chromatin);GO:0000981(DNA-binding transcription factor activity, RNA polymerase II-specific);GO:0001158(enhancer sequence-specific DNA binding);GO:0001227(DNA-binding transcription repressor activity, RNA polymerase II-specific);GO:0001889(liver development);GO:0003676(nucleic acid binding);GO:0003682(chromatin bindi…	NA	K09207	NA
1	ENSDARG00000071403	oaz1a	5.46509	4.2709	0.355705	0.662	0.695	1.53474e-10	4.25308e-06	ornithine decarboxylase antizyme 1a [Source:ZFIN;Acc:ZDB-GENE-020731-4]	GO:0005634(nucleus);GO:0005737(cytoplasm);GO:0005829(cytosol);GO:0006595(polyamine metabolic process);GO:0006596(polyamine biosynthetic process);GO:0008073(ornithine decarboxylase inhibitor activity);GO:0043086(negative regulation of catalytic activity);GO:0045732(positive regulation of protein catabolic process);GO:0090316(positive regulation of intracellular protein transport)	NA	K16548	NA
1	ENSDARG00000076667	ccng1	1.86689	1.34054	0.477827	0.293	0.282	1.53981e-10	4.26713e-06	cyclin G1 [Source:ZFIN;Acc:ZDB-GENE-020322-1]	GO:0000079(regulation of cyclin-dependent protein serine/threonine kinase activity);GO:0000278(mitotic cell cycle);GO:0000307(cyclin-dependent protein kinase holoenzyme complex);GO:0004672(protein kinase activity);GO:0005634(nucleus);GO:0005737(cytoplasm);GO:0006468(protein phosphorylation);GO:0007088(regulation of mitotic nuclear division);GO:0008284(positive regulation of cell population prolif…	04115(p53 signaling pathway)	K10145	NA
1	ENSDARG00000060687	chd2	2.27828	1.61744	0.494234	0.312	0.307	1.58085e-10	4.38086e-06	chromodomain helicase DNA binding protein 2 [Source:ZFIN;Acc:ZDB-GENE-050419-256]	GO:0005524(ATP binding);GO:0005634(nucleus);GO:0040011(locomotion);GO:0043009(chordate embryonic development)	NA	K20091	EC:3.6.4.12
1	ENSDARG00000004372	fmnl3	0.720281	0.537316	0.422788	0.129	0.095	1.7804e-10	4.93384e-06	formin-like 3 [Source:ZFIN;Acc:ZDB-GENE-030131-1571]	GO:0001525(angiogenesis);GO:0002040(sprouting angiogenesis);GO:0003779(actin binding);GO:0005515(protein binding);GO:0005737(cytoplasm);GO:0005886(plasma membrane);GO:0007010(cytoskeleton organization);GO:0007275(multicellular organism development);GO:0008360(regulation of cell shape);GO:0016020(membrane);GO:0016043(cellular component organization);GO:0016477(cell migration);GO:0017048(Rho GTPase…	NA	NA	NA
1	ENSDARG00000036257	rasal2	1.14897	0.892043	0.365152	0.198	0.194	1.78548e-10	4.94791e-06	RAS protein activator like 2 [Source:ZFIN;Acc:ZDB-GENE-070912-180]	GO:0005096(GTPase activator activity);GO:0007165(signal transduction);GO:0043087(regulation of GTPase activity);GO:0043547(positive regulation of GTPase activity)	NA	NA	NA
1	ENSDARG00000078042	il10rb	1.91601	1.46889	0.383372	0.335	0.33	1.89609e-10	5.25445e-06	interleukin 10 receptor, beta [Source:ZFIN;Acc:ZDB-GENE-050909-1]	GO:0002757(immune response-activating signal transduction);GO:0004896(cytokine receptor activity);GO:0004904(interferon receptor activity);GO:0005515(protein binding);GO:0005886(plasma membrane);GO:0016020(membrane);GO:0016021(integral component of membrane);GO:0019221(cytokine-mediated signaling pathway)	04060(Cytokine-cytokine receptor interaction);04217(Necroptosis);04620(Toll-like receptor signaling pathway);04621(NOD-like receptor signaling pathway);05168(Herpes simplex virus 1 infection)	K05130	NA
1	ENSDARG00000099439	serp1	1.82282	1.50419	0.277182	0.266	0.302	2.21041e-10	6.12549e-06	stress-associated endoplasmic reticulum protein 1 [Source:ZFIN;Acc:ZDB-GENE-030131-8741]	GO:0005783(endoplasmic reticulum);GO:0005789(endoplasmic reticulum membrane);GO:0006486(protein glycosylation);GO:0015031(protein transport);GO:0016020(membrane);GO:0016021(integral component of membrane);GO:0030968(endoplasmic reticulum unfolded protein response)	NA	NA	NA
1	ENSDARG00000079312	kmt2ca	1.58418	1.253	0.338341	0.255	0.28	2.62018e-10	7.26104e-06	lysine (K)-specific methyltransferase 2Ca [Source:ZFIN;Acc:ZDB-GENE-080520-3]	GO:0003713(transcription coactivator activity);GO:0005515(protein binding);GO:0005634(nucleus);GO:0008168(methyltransferase activity);GO:0016740(transferase activity);GO:0018024(histone-lysine N-methyltransferase activity);GO:0032259(methylation);GO:0034968(histone lysine methylation);GO:0042393(histone binding);GO:0042800(histone methyltransferase activity (H3-K4 specific));GO:0044666(MLL3/4 com…	00310(Lysine degradation)	K09188	EC:2.1.1.43
1	ENSDARG00000052856	khdrbs1a	7.48103	5.702	0.391768	0.772	0.757	3.49066e-10	9.67333e-06	KH domain containing, RNA binding, signal transduction associated 1a [Source:ZFIN;Acc:ZDB-GENE-000210-25]	GO:0003676(nucleic acid binding);GO:0003723(RNA binding)	NA	NA	NA
1	ENSDARG00000062933	cmip	8.19974	6.09718	0.427436	0.783	0.762	3.65417e-10	1.01264e-05	c-Maf inducing protein [Source:ZFIN;Acc:ZDB-GENE-050419-50]	NA	NA	NA	NA
1	ENSDARG00000017772	mdh1aa	2.00729	1.46991	0.449523	0.35	0.322	3.76884e-10	1.04442e-05	malate dehydrogenase 1Aa, NAD (soluble) [Source:ZFIN;Acc:ZDB-GENE-040204-1]	GO:0003824(catalytic activity);GO:0005829(cytosol);GO:0005975(carbohydrate metabolic process);GO:0006099(tricarboxylic acid cycle);GO:0006107(oxaloacetate metabolic process);GO:0006108(malate metabolic process);GO:0006734(NADH metabolic process);GO:0016491(oxidoreductase activity);GO:0016615(malate dehydrogenase activity);GO:0016616(oxidoreductase activity, acting on the CH-OH group of donors, NA…	00020(Citrate cycle (TCA cycle));00270(Cysteine and methionine metabolism);00620(Pyruvate metabolism);00630(Glyoxylate and dicarboxylate metabolism)	K00025	EC:1.1.1.37
1	ENSDARG00000055080	rbm4.2	3.33068	2.41499	0.463795	0.502	0.459	3.7773e-10	1.04676e-05	RNA binding motif protein 4.2 [Source:ZFIN;Acc:ZDB-GENE-030131-3019]	GO:0000381(regulation of alternative mRNA splicing, via spliceosome);GO:0003676(nucleic acid binding);GO:0003723(RNA binding);GO:0005634(nucleus);GO:0008270(zinc ion binding);GO:0016607(nuclear speck);GO:0045292(mRNA cis splicing, via spliceosome)	NA	NA	NA
1	ENSDARG00000077732	alyref	2.32327	1.9149	0.278885	0.411	0.434	3.83141e-10	1.06176e-05	Aly/REF export factor [Source:ZFIN;Acc:ZDB-GENE-070928-29]	GO:0003676(nucleic acid binding);GO:0003723(RNA binding)	03013(RNA transport);03015(mRNA surveillance pathway);03040(Spliceosome);05168(Herpes simplex virus 1 infection)	K12881	NA
1	ENSDARG00000039117	tefa	2.66443	1.76973	0.590298	0.414	0.314	3.9948e-10	1.10704e-05	thyrotrophic embryonic factor a [Source:ZFIN;Acc:ZDB-GENE-990415-264]	GO:0000977(RNA polymerase II regulatory region sequence-specific DNA binding);GO:0003700(DNA-binding transcription factor activity);GO:0005634(nucleus);GO:0006355(regulation of transcription, DNA-templated);GO:0006357(regulation of transcription by RNA polymerase II);GO:0043565(sequence-specific DNA binding);GO:0045893(positive regulation of transcription, DNA-templated);GO:0071482(cellular respo…	NA	K09058	NA
1	ENSDARG00000098387	tmem176l.3a	1.36443	1.09868	0.312532	0.259	0.257	4.21135e-10	1.16705e-05	transmembrane protein 176l.3a [Source:ZFIN;Acc:ZDB-GENE-080829-13]	GO:0016020(membrane);GO:0016021(integral component of membrane)	NA	NA	NA
1	ENSDARG00000101074	glud1b	0.889325	0.668447	0.411898	0.148	0.143	4.3346e-10	1.2012e-05	glutamate dehydrogenase 1b [Source:ZFIN;Acc:ZDB-GENE-030828-1]	GO:0005575(cellular_component);GO:0006520(cellular amino acid metabolic process);GO:0016491(oxidoreductase activity);GO:0016639(oxidoreductase activity, acting on the CH-NH2 group of donors, NAD or NADP as acceptor);GO:0055114(oxidation-reduction process)	00220(Arginine biosynthesis);00250(Alanine, aspartate and glutamate metabolism);00471(D-Glutamine and D-glutamate metabolism);00910(Nitrogen metabolism);04217(Necroptosis)	K00261	EC:1.4.1.3
1	ENSDARG00000037059	slc44a2	1.90466	1.55629	0.291419	0.335	0.32	5.40242e-10	1.49712e-05	solute carrier family 44 (choline transporter), member 2 [Source:ZFIN;Acc:ZDB-GENE-030131-3065]	GO:0016020(membrane);GO:0016021(integral component of membrane)	NA	K15377	NA
1	ENSDARG00000056138	sf3b1	2.39327	1.7634	0.440626	0.395	0.381	5.77945e-10	1.6016e-05	splicing factor 3b, subunit 1 [Source:ZFIN;Acc:ZDB-GENE-040827-3]	GO:0000245(spliceosomal complex assembly);GO:0003729(mRNA binding);GO:0005686(U2 snRNP);GO:0005689(U12-type spliceosomal complex);GO:0014032(neural crest cell development);GO:0030318(melanocyte differentiation);GO:0042981(regulation of apoptotic process);GO:0060216(definitive hemopoiesis);GO:0060218(hematopoietic stem cell differentiation);GO:0061515(myeloid cell development);GO:0071004(U2-type p…	03040(Spliceosome)	K12828	NA
1	ENSDARG00000086103	slc37a1	1.84844	1.11191	0.733263	0.198	0.16	6.66408e-10	1.84675e-05	solute carrier family 37 (glucose-6-phosphate transporter), member 1 [Source:ZFIN;Acc:ZDB-GENE-041114-151]	GO:0016020(membrane);GO:0016021(integral component of membrane);GO:0022857(transmembrane transporter activity);GO:0055085(transmembrane transport)	NA	K13783	NA
1	ENSDARG00000095451	si:ch211-196l7.4	6.03236	4.63035	0.381601	0.646	0.668	7.29484e-10	2.02155e-05	si:ch211-196l7.4 [Source:ZFIN;Acc:ZDB-GENE-050419-122]	NA	NA	NA	NA
1	ENSDARG00000101900	xrn2	0.840202	0.670129	0.326298	0.16	0.164	7.30915e-10	2.02551e-05	5'-3' exoribonuclease 2 [Source:ZFIN;Acc:ZDB-GENE-040426-2874]	GO:0003676(nucleic acid binding);GO:0004518(nuclease activity);GO:0004527(exonuclease activity);GO:0004534(5'-3' exoribonuclease activity);GO:0005634(nucleus);GO:0006139(nucleobase-containing compound metabolic process);GO:0006397(mRNA processing);GO:0016787(hydrolase activity);GO:0090305(nucleic acid phosphodiester bond hydrolysis);GO:0090503(RNA phosphodiester bond hydrolysis, exonucleolytic)	03008(Ribosome biogenesis in eukaryotes);03018(RNA degradation)	K12619	EC:3.1.13.-
1	ENSDARG00000104882	FP085399.5	1.48309	0.838543	0.822649	0.167	0.073	7.85434e-10	2.1766e-05	NA	NA	NA	NA	NA
1	ENSDARG00000076128	prkar1aa	2.40866	1.78619	0.431344	0.449	0.359	8.13205e-10	2.25355e-05	protein kinase, cAMP-dependent, regulatory, type I, alpha (tissue specific extinguisher 1) a [Source:ZFIN;Acc:ZDB-GENE-050116-2]	GO:0000166(nucleotide binding);GO:0001932(regulation of protein phosphorylation);GO:0005829(cytosol);GO:0005952(cAMP-dependent protein kinase complex);GO:0008603(cAMP-dependent protein kinase regulator activity);GO:0016301(kinase activity);GO:0016310(phosphorylation);GO:0019934(cGMP-mediated signaling);GO:0030552(cAMP binding);GO:0045859(regulation of protein kinase activity);GO:0047555(3',5'-cyc…	NA	NA	NA
1	ENSDARG00000033889	spty2d1	2.25232	1.58962	0.502735	0.354	0.272	8.13998e-10	2.25575e-05	SPT2 chromatin protein domain containing 1 [Source:ZFIN;Acc:ZDB-GENE-050522-212]	NA	NA	K15193	NA
1	ENSDARG00000098635	irf2bp2b	1.16727	0.753171	0.632085	0.205	0.115	8.1575e-10	2.26061e-05	interferon regulatory factor 2 binding protein 2b [Source:ZFIN;Acc:ZDB-GENE-040426-2574]	NA	NA	K22383	NA
1	ENSDARG00000022303	higd1a	8.89799	7.41519	0.262995	0.722	0.804	8.94256e-10	2.47816e-05	HIG1 hypoxia inducible domain family, member 1A [Source:ZFIN;Acc:ZDB-GENE-030826-15]	GO:0016020(membrane);GO:0016021(integral component of membrane)	NA	NA	NA
1	ENSDARG00000097478	qkia	1.19849	0.940642	0.349497	0.221	0.226	9.20611e-10	2.5512e-05	QKI, KH domain containing, RNA binding a [Source:ZFIN;Acc:ZDB-GENE-990415-230]	GO:0003676(nucleic acid binding);GO:0003723(RNA binding)	NA	NA	NA
1	ENSDARG00000038524	pik3r1	2.23226	1.54363	0.532182	0.319	0.268	9.36214e-10	2.59444e-05	phosphoinositide-3-kinase, regulatory subunit 1 (alpha) [Source:ZFIN;Acc:ZDB-GENE-030131-1280]	GO:0005515(protein binding);GO:0005942(phosphatidylinositol 3-kinase complex);GO:0007165(signal transduction);GO:0008286(insulin receptor signaling pathway);GO:0035014(phosphatidylinositol 3-kinase regulator activity);GO:0043551(regulation of phosphatidylinositol 3-kinase activity);GO:0046854(phosphatidylinositol phosphorylation);GO:0046935(1-phosphatidylinositol-3-kinase regulator activity)	04012(ErbB signaling pathway);04068(FoxO signaling pathway);04070(Phosphatidylinositol signaling system);04140(Autophagy - animal);04150(mTOR signaling pathway);04210(Apoptosis);04218(Cellular senescence);04370(VEGF signaling pathway);04510(Focal adhesion);04620(Toll-like receptor signaling pathway);04625(C-type lectin receptor signaling pathway);04810(Regulation of actin cytoskeleton);04910(Insu…	K02649	NA
1	ENSDARG00000035285	ncor1	1.19221	0.821967	0.536483	0.224	0.158	9.4477e-10	2.61815e-05	nuclear receptor corepressor 1 [Source:ZFIN;Acc:ZDB-GENE-040426-993]	GO:0000118(histone deacetylase complex);GO:0000122(negative regulation of transcription by RNA polymerase II);GO:0000790(nuclear chromatin);GO:0001012(RNA polymerase II regulatory region DNA binding);GO:0003677(DNA binding);GO:0003682(chromatin binding);GO:0003714(transcription corepressor activity);GO:0005634(nucleus);GO:0009952(anterior/posterior pattern specification);GO:0016580(Sin3 complex);…	NA	K04650	NA
1	ENSDARG00000063218	ppm1la	0.858151	0.540067	0.668093	0.133	0.038	1.03413e-09	2.86579e-05	protein phosphatase, Mg2+/Mn2+ dependent, 1La [Source:ZFIN;Acc:ZDB-GENE-061103-118]	GO:0003824(catalytic activity);GO:0004721(phosphoprotein phosphatase activity);GO:0004722(protein serine/threonine phosphatase activity);GO:0004724(magnesium-dependent protein serine/threonine phosphatase activity);GO:0006470(protein dephosphorylation);GO:0007178(transmembrane receptor protein serine/threonine kinase signaling pathway);GO:0016787(hydrolase activity);GO:0043169(cation binding);GO:…	NA	K17506	EC:3.1.3.16
1	ENSDARG00000004402	elovl6	0.706523	0.453501	0.639628	0.103	0.022	1.03453e-09	2.86688e-05	ELOVL fatty acid elongase 6 [Source:ZFIN;Acc:ZDB-GENE-030114-1]	GO:0005783(endoplasmic reticulum);GO:0005789(endoplasmic reticulum membrane);GO:0006629(lipid metabolic process);GO:0006631(fatty acid metabolic process);GO:0006633(fatty acid biosynthetic process);GO:0006636(unsaturated fatty acid biosynthetic process);GO:0009922(fatty acid elongase activity);GO:0016020(membrane);GO:0016021(integral component of membrane);GO:0016740(transferase activity);GO:0019…	00062(Fatty acid elongation);01040(Biosynthesis of unsaturated fatty acids)	K10203	EC:2.3.1.199
1	ENSDARG00000097845	si:ch211-105j21.9	2.45451	1.85136	0.406845	0.357	0.363	1.20881e-09	3.34984e-05	si:ch211-105j21.9 [Source:ZFIN;Acc:ZDB-GENE-131127-499]	GO:0016020(membrane);GO:0016021(integral component of membrane)	NA	NA	NA
1	ENSDARG00000002758	dedd1	3.18168	2.32966	0.449666	0.449	0.414	1.26425e-09	3.5035e-05	death effector domain-containing 1 [Source:ZFIN;Acc:ZDB-GENE-000616-2]	GO:0003677(DNA binding);GO:0005515(protein binding);GO:0005730(nucleolus);GO:0006915(apoptotic process);GO:0008625(extrinsic apoptotic signaling pathway via death domain receptors);GO:0042981(regulation of apoptotic process)	NA	NA	NA
1	ENSDARG00000013794	klf11b	1.02761	0.698315	0.557346	0.175	0.116	1.33241e-09	3.69239e-05	Kruppel-like factor 11b [Source:ZFIN;Acc:ZDB-GENE-061103-82]	GO:0000981(DNA-binding transcription factor activity, RNA polymerase II-specific);GO:0003676(nucleic acid binding);GO:0005634(nucleus);GO:0006357(regulation of transcription by RNA polymerase II)	NA	K09209	NA
1	ENSDARG00000060200	CU019662.1	2.51499	1.62647	0.628805	0.346	0.286	1.36726e-09	3.78894e-05	regulator of G protein signaling 14b [Source:NCBI gene;Acc:100003648]	GO:0001965(G-protein alpha-subunit binding);GO:0005092(GDP-dissociation inhibitor activity);GO:0005096(GTPase activator activity);GO:0007051(spindle organization);GO:0007165(signal transduction);GO:0008017(microtubule binding);GO:0030695(GTPase regulator activity);GO:0035556(intracellular signal transduction);GO:0043547(positive regulation of GTPase activity);GO:0050790(regulation of catalytic ac…	NA	K16449	NA
1	ENSDARG00000078567	lonrf1l	1.90974	1.27989	0.577349	0.323	0.243	1.77597e-09	4.92157e-05	LON peptidase N-terminal domain and ring finger 1, like [Source:ZFIN;Acc:ZDB-GENE-081104-397]	GO:0005515(protein binding);GO:0046872(metal ion binding)	NA	NA	NA
1	ENSDARG00000007795	cst3	1.93237	1.41558	0.448975	0.338	0.3	1.82947e-09	5.06983e-05	cystatin C (amyloid angiopathy and cerebral hemorrhage) [Source:ZFIN;Acc:ZDB-GENE-030131-373]	GO:0004869(cysteine-type endopeptidase inhibitor activity);GO:0005615(extracellular space);GO:0010466(negative regulation of peptidase activity);GO:0010951(negative regulation of endopeptidase activity);GO:0030414(peptidase inhibitor activity)	NA	K13899	NA
1	ENSDARG00000009830	hdlbpa	1.20334	0.89568	0.425986	0.228	0.213	2.20093e-09	6.09923e-05	high density lipoprotein binding protein a [Source:ZFIN;Acc:ZDB-GENE-030131-2032]	GO:0003676(nucleic acid binding);GO:0003723(RNA binding);GO:0071391(cellular response to estrogen stimulus)	NA	NA	NA
1	ENSDARG00000030440	rsrp1	5.58588	3.83323	0.543224	0.605	0.536	2.59987e-09	7.20477e-05	arginine/serine-rich protein 1 [Source:ZFIN;Acc:ZDB-GENE-060616-210]	NA	NA	NA	NA
1	ENSDARG00000098228	thrap3b	2.00883	1.5334	0.38962	0.323	0.322	2.61394e-09	7.24374e-05	thyroid hormone receptor associated protein 3b [Source:ZFIN;Acc:ZDB-GENE-040516-9]	NA	NA	K13112	NA
1	ENSDARG00000017294	gnai2b	2.01658	1.49268	0.434013	0.335	0.302	2.63193e-09	7.29361e-05	guanine nucleotide binding protein (G protein), alpha inhibiting activity polypeptide 2b [Source:ZFIN;Acc:ZDB-GENE-030131-5861]	GO:0000166(nucleotide binding);GO:0001664(G protein-coupled receptor binding);GO:0003924(GTPase activity);GO:0005525(GTP binding);GO:0005834(heterotrimeric G-protein complex);GO:0007165(signal transduction);GO:0007186(G protein-coupled receptor signaling pathway);GO:0007188(adenylate cyclase-modulating G protein-coupled receptor signaling pathway);GO:0019001(guanyl nucleotide binding);GO:0031683(…	04261(Adrenergic signaling in cardiomyocytes);04371(Apelin signaling pathway);04540(Gap junction);04914(Progesterone-mediated oocyte maturation);04916(Melanogenesis)	K04630	NA
1	ENSDARG00000003017	ube2al	3.35986	2.32036	0.534052	0.433	0.405	2.63828e-09	7.31121e-05	ubiquitin conjugating enzyme E2 A, like [Source:ZFIN;Acc:ZDB-GENE-030131-4195]	GO:0000166(nucleotide binding);GO:0000209(protein polyubiquitination);GO:0000790(nuclear chromatin);GO:0005524(ATP binding);GO:0006281(DNA repair);GO:0016740(transferase activity);GO:0033503(HULC complex);GO:0043161(proteasome-mediated ubiquitin-dependent protein catabolic process);GO:0061631(ubiquitin conjugating enzyme activity)	04120(Ubiquitin mediated proteolysis)	K10573	EC:2.3.2.23
1	ENSDARG00000101050	tmc8	1.60504	1.12875	0.507888	0.297	0.243	2.8485e-09	7.89377e-05	transmembrane channel-like 8 [Source:ZFIN;Acc:ZDB-GENE-081114-2]	GO:0005216(ion channel activity);GO:0005887(integral component of plasma membrane);GO:0008381(mechanosensitive ion channel activity);GO:0016020(membrane);GO:0016021(integral component of membrane);GO:0034220(ion transmembrane transport);GO:0055085(transmembrane transport)	NA	K21988	NA
1	ENSDARG00000103146	nlrc3	1.15908	0.732532	0.662012	0.202	0.098	3.15745e-09	8.74993e-05	NLR family, CARD domain containing 3 [Source:ZFIN;Acc:ZDB-GENE-071119-1]	GO:0005515(protein binding);GO:0005737(cytoplasm);GO:0035556(intracellular signal transduction)	NA	K22614	NA
1	ENSDARG00000018898	zfand5a	2.36561	1.69244	0.483109	0.369	0.319	3.26594e-09	9.05058e-05	zinc finger, AN1-type domain 5a [Source:ZFIN;Acc:ZDB-GENE-040426-1979]	GO:0003677(DNA binding);GO:0008270(zinc ion binding);GO:0046872(metal ion binding)	NA	NA	NA
1	ENSDARG00000044362	unc119b	0.602322	0.428885	0.489944	0.114	0.033	3.27069e-09	9.06374e-05	unc-119 homolog b (C. elegans) [Source:ZFIN;Acc:ZDB-GENE-050201-2]	GO:0000281(mitotic cytokinesis);GO:0000922(spindle pole);GO:0003674(molecular_function);GO:0005575(cellular_component);GO:0005813(centrosome);GO:0007399(nervous system development);GO:0007601(visual perception);GO:0008289(lipid binding);GO:0042953(lipoprotein transport);GO:0045171(intercellular bridge);GO:0051233(spindle midzone);GO:0061098(positive regulation of protein tyrosine kinase activity)…	NA	NA	NA
1	ENSDARG00000103505	fbxl3a	0.742359	0.559902	0.406941	0.148	0.11	3.44509e-09	9.54704e-05	F-box and leucine-rich repeat protein 3a [Source:ZFIN;Acc:ZDB-GENE-030912-5]	GO:0005515(protein binding);GO:0005634(nucleus);GO:0005829(cytosol);GO:0016567(protein ubiquitination);GO:0019005(SCF ubiquitin ligase complex);GO:0031146(SCF-dependent proteasomal ubiquitin-dependent protein catabolic process);GO:0043153(entrainment of circadian clock by photoperiod);GO:0061630(ubiquitin protein ligase activity)	NA	K10269	NA
1	ENSDARG00000075643	ifi35	1.96217	1.48597	0.401044	0.335	0.312	3.63791e-09	0.000100814	interferon-induced protein 35 [Source:ZFIN;Acc:ZDB-GENE-100311-2]	NA	NA	NA	NA
1	ENSDARG00000019191	sept12	1.4186	1.0627	0.416731	0.251	0.232	3.71355e-09	0.00010291	septin 12 [Source:ZFIN;Acc:ZDB-GENE-120215-68]	GO:0000166(nucleotide binding);GO:0003924(GTPase activity);GO:0005525(GTP binding);GO:0005940(septin ring);GO:0015630(microtubule cytoskeleton);GO:0031105(septin complex);GO:0032947(protein-containing complex scaffold activity);GO:0061640(cytoskeleton-dependent cytokinesis)	NA	K16938	NA
1	ENSDARG00000069074	cry3a	0.746922	0.527662	0.501346	0.148	0.077	3.93969e-09	0.000109177	cryptochrome circadian regulator 3a [Source:ZFIN;Acc:ZDB-GENE-010426-4]	GO:0009266(response to temperature stimulus);GO:0009416(response to light stimulus);GO:0045892(negative regulation of transcription, DNA-templated)	NA	K02295	NA
1	ENSDARG00000036588	mhc1zba	8.68655	6.42048	0.436102	0.707	0.671	3.99436e-09	0.000110692	major histocompatibility complex class I ZBA [Source:ZFIN;Acc:ZDB-GENE-040426-2149]	GO:0016020(membrane);GO:0016021(integral component of membrane)	NA	NA	NA
1	ENSDARG00000027249	btg1	26.473	19.6487	0.430088	0.977	0.951	4.06467e-09	0.00011264	B-cell translocation gene 1, anti-proliferative [Source:ZFIN;Acc:ZDB-GENE-010726-1]	GO:0005634(nucleus);GO:0005737(cytoplasm);GO:0008285(negative regulation of cell population proliferation);GO:0045930(negative regulation of mitotic cell cycle)	03018(RNA degradation)	K14443	NA
1	ENSDARG00000070475	khdrbs1b	2.82648	2.05311	0.461193	0.395	0.386	4.44562e-09	0.000123197	KH domain containing, RNA binding, signal transduction associated 1b [Source:ZFIN;Acc:ZDB-GENE-040426-2344]	GO:0003676(nucleic acid binding);GO:0003723(RNA binding)	NA	K13198	NA
1	ENSDARG00000055124	ccnl1a	1.63098	1.25636	0.376491	0.304	0.271	4.63944e-09	0.000128568	cyclin L1a [Source:ZFIN;Acc:ZDB-GENE-050419-206]	GO:0000079(regulation of cyclin-dependent protein serine/threonine kinase activity);GO:0005634(nucleus);GO:0006355(regulation of transcription, DNA-templated);GO:0006357(regulation of transcription by RNA polymerase II);GO:0006396(RNA processing);GO:0016538(cyclin-dependent protein serine/threonine kinase regulator activity)	NA	NA	NA
1	ENSDARG00000062552	lpar6a	0.927725	0.637374	0.541557	0.167	0.091	5.22749e-09	0.000144864	lysophosphatidic acid receptor 6a [Source:ZFIN;Acc:ZDB-GENE-061013-343]	GO:0001525(angiogenesis);GO:0004930(G protein-coupled receptor activity);GO:0005887(integral component of plasma membrane);GO:0007165(signal transduction);GO:0007186(G protein-coupled receptor signaling pathway);GO:0007188(adenylate cyclase-modulating G protein-coupled receptor signaling pathway);GO:0016020(membrane);GO:0016021(integral component of membrane);GO:0035025(positive regulation of Rho…	04080(Neuroactive ligand-receptor interaction)	K04273	NA
1	ENSDARG00000015722	kctd5a	4.6786	3.59557	0.379857	0.563	0.585	5.77571e-09	0.000160056	potassium channel tetramerization domain containing 5a [Source:ZFIN;Acc:ZDB-GENE-030131-727]	GO:0005515(protein binding);GO:0005737(cytoplasm);GO:0031463(Cul3-RING ubiquitin ligase complex);GO:0043161(proteasome-mediated ubiquitin-dependent protein catabolic process);GO:0051260(protein homooligomerization);GO:0097602(cullin family protein binding)	NA	K21914	NA
1	ENSDARG00000097992	BX005450.1	1.16367	0.820613	0.50391	0.194	0.123	6.01611e-09	0.000166718	NA	NA	NA	NA	NA
1	ENSDARG00000114387	CU499336.2	4.06648	2.70522	0.588032	0.487	0.412	6.92939e-09	0.000192027	NA	NA	NA	NA	NA
1	ENSDARG00000087893	rnf216	1.05095	0.769408	0.449877	0.186	0.142	7.51083e-09	0.00020814	ring finger protein 216 [Source:ZFIN;Acc:ZDB-GENE-081104-199]	GO:0021549(cerebellum development);GO:0043010(camera-type eye development)	NA	K11976	EC:2.3.2.31
1	ENSDARG00000059789	parp8	2.26854	1.57102	0.530056	0.395	0.304	7.52396e-09	0.000208504	poly (ADP-ribose) polymerase family, member 8 [Source:ZFIN;Acc:ZDB-GENE-060929-432]	GO:0003950(NAD+ ADP-ribosyltransferase activity);GO:0006471(protein ADP-ribosylation);GO:0016740(transferase activity);GO:0016757(transferase activity, transferring glycosyl groups)	NA	K15258	EC:2.4.2.30
1	ENSDARG00000078904	brd4	1.64201	1.23086	0.415797	0.304	0.28	7.73808e-09	0.000214438	bromodomain containing 4 [Source:ZFIN;Acc:ZDB-GENE-030131-267]	GO:0000793(condensed chromosome);GO:0002039(p53 binding);GO:0002574(thrombocyte differentiation);GO:0003682(chromatin binding);GO:0005515(protein binding);GO:0005634(nucleus);GO:0005694(chromosome);GO:0006325(chromatin organization);GO:0032968(positive regulation of transcription elongation from RNA polymerase II promoter);GO:0042393(histone binding);GO:0043123(positive regulation of I-kappaB kin…	NA	K11722	NA
1	ENSDARG00000078119	sh3bp1	0.723507	0.539183	0.424231	0.141	0.099	9.28644e-09	0.000257346	SH3-domain binding protein 1 [Source:ZFIN;Acc:ZDB-GENE-121128-2]	GO:0005096(GTPase activator activity);GO:0005515(protein binding);GO:0005737(cytoplasm);GO:0007165(signal transduction);GO:0032956(regulation of actin cytoskeleton organization);GO:0043547(positive regulation of GTPase activity);GO:0048365(Rac GTPase binding)	NA	K20652	NA
1	ENSDARG00000075793	prex1	1.46315	1.03288	0.502401	0.247	0.205	9.36147e-09	0.000259425	phosphatidylinositol-3,4,5-trisphosphate-dependent Rac exchange factor 1 [Source:ZFIN;Acc:ZDB-GENE-030131-1428]	GO:0005085(guanyl-nucleotide exchange factor activity);GO:0005089(Rho guanyl-nucleotide exchange factor activity);GO:0005515(protein binding);GO:0005886(plasma membrane);GO:0007186(G protein-coupled receptor signaling pathway);GO:0030676(Rac guanyl-nucleotide exchange factor activity);GO:0035023(regulation of Rho protein signal transduction);GO:0035556(intracellular signal transduction);GO:003809…	NA	NA	NA
1	ENSDARG00000071506	mgat5	0.622931	0.464653	0.42292	0.118	0.077	9.54649e-09	0.000264552	alpha-1,6-mannosylglycoprotein 6-beta-N-acetylglucosaminyltransferase [Source:ZFIN;Acc:ZDB-GENE-060616-238]	GO:0005794(Golgi apparatus);GO:0006487(protein N-linked glycosylation);GO:0016020(membrane);GO:0016021(integral component of membrane);GO:0030144(alpha-1,6-mannosylglycoprotein 6-beta-N-acetylglucosaminyltransferase activity);GO:0042246(tissue regeneration);GO:0070658(neuromast hair cell differentiation involved in neuromast regeneration)	00510(N-Glycan biosynthesis)	K00744	EC:2.4.1.155
1	ENSDARG00000008370	csnk1da	1.36315	1.09424	0.31701	0.247	0.251	1.09516e-08	0.000303492	casein kinase 1, delta a [Source:ZFIN;Acc:ZDB-GENE-030131-825]	GO:0000166(nucleotide binding);GO:0004672(protein kinase activity);GO:0004674(protein serine/threonine kinase activity);GO:0005524(ATP binding);GO:0005634(nucleus);GO:0005737(cytoplasm);GO:0005876(spindle microtubule);GO:0006468(protein phosphorylation);GO:0016055(Wnt signaling pathway);GO:0016301(kinase activity);GO:0016310(phosphorylation);GO:0016740(transferase activity);GO:0018105(peptidyl-se…	04340(Hedgehog signaling pathway);04540(Gap junction)	K08959	EC:2.7.11.1
1	ENSDARG00000099874	agap2	0.998797	0.728741	0.454786	0.194	0.136	1.16636e-08	0.000323223	ArfGAP with GTPase domain, ankyrin repeat and PH domain 2 [Source:ZFIN;Acc:ZDB-GENE-061103-343]	GO:0003924(GTPase activity);GO:0005096(GTPase activator activity);GO:0005515(protein binding);GO:0005525(GTP binding);GO:0005634(nucleus);GO:0043547(positive regulation of GTPase activity);GO:0046872(metal ion binding)	04068(FoxO signaling pathway);04144(Endocytosis)	K17848	NA
1	ENSDARG00000023627	ggps1	1.61137	1.31866	0.289211	0.262	0.281	1.21807e-08	0.000337552	geranylgeranyl diphosphate synthase 1 [Source:ZFIN;Acc:ZDB-GENE-030131-8742]	GO:0008299(isoprenoid biosynthetic process);GO:0016740(transferase activity)	00900(Terpenoid backbone biosynthesis)	K00804	2.5.1.10;2.5.1.29;EC:2.5.1.1
1	ENSDARG00000079687	rnf10	1.90706	1.49345	0.3527	0.346	0.339	1.31452e-08	0.00036428	ring finger protein 10 [Source:ZFIN;Acc:ZDB-GENE-030131-2969]	GO:0046872(metal ion binding)	NA	NA	NA
1	ENSDARG00000089382	zgc:158463	154.246	128.004	0.269041	1	1	1.34604e-08	0.000373016	zgc:158463 [Source:ZFIN;Acc:ZDB-GENE-070410-9]	GO:0003674(molecular_function);GO:0005575(cellular_component);GO:0008150(biological_process)	NA	NA	NA
1	ENSDARG00000092870	BX936337.1	2.0991	1.52442	0.461512	0.35	0.317	1.38242e-08	0.000383095	NA	NA	NA	NA	NA
1	ENSDARG00000044625	pcf11	2.49126	2.07602	0.263058	0.392	0.447	1.39806e-08	0.000387431	PCF11, cleavage and polyadenylation factor subunit [Source:ZFIN;Acc:ZDB-GENE-041114-175]	GO:0000993(RNA polymerase II complex binding);GO:0003729(mRNA binding);GO:0005737(cytoplasm);GO:0006369(termination of RNA polymerase II transcription);GO:0006378(mRNA polyadenylation);GO:0006886(intracellular protein transport)	03015(mRNA surveillance pathway)	K14400	NA
1	ENSDARG00000068708	ifrd1	2.65481	2.02831	0.388335	0.43	0.429	1.45248e-08	0.000402511	interferon-related developmental regulator 1 [Source:ZFIN;Acc:ZDB-GENE-030131-6132]	GO:0005575(cellular_component);GO:0005634(nucleus);GO:0008150(biological_process)	NA	NA	NA
1	ENSDARG00000034187	calm1b	5.91988	4.23213	0.484183	0.692	0.611	1.46611e-08	0.00040629	calmodulin 1b [Source:ZFIN;Acc:ZDB-GENE-030804-2]	GO:0005509(calcium ion binding);GO:0019722(calcium-mediated signaling);GO:0046872(metal ion binding)	04020(Calcium signaling pathway);04070(Phosphatidylinositol signaling system);04114(Oocyte meiosis);04218(Cellular senescence);04261(Adrenergic signaling in cardiomyocytes);04270(Vascular smooth muscle contraction);04371(Apelin signaling pathway);04625(C-type lectin receptor signaling pathway);04744(Phototransduction);04910(Insulin signaling pathway);04912(GnRH signaling pathway);04916(Melanogene…	K02183	NA
1	ENSDARG00000007737	zyg11	1.82344	1.31202	0.47487	0.293	0.262	1.48277e-08	0.000410904	zyg-11 homolog (C. elegans) [Source:ZFIN;Acc:ZDB-GENE-041014-17]	GO:0005515(protein binding);GO:0031462(Cul2-RING ubiquitin ligase complex)	NA	K10350	NA
1	ENSDARG00000022213	uck2b	0.473191	0.392117	0.271139	0.106	0.082	1.5162e-08	0.000420169	uridine-cytidine kinase 2b [Source:ZFIN;Acc:ZDB-GENE-030131-5265]	GO:0000166(nucleotide binding);GO:0004849(uridine kinase activity);GO:0005524(ATP binding);GO:0005829(cytosol);GO:0006238(CMP salvage);GO:0016301(kinase activity);GO:0016310(phosphorylation);GO:0016740(transferase activity);GO:0019206(nucleoside kinase activity);GO:0044206(UMP salvage);GO:0044211(CTP salvage)	00240(Pyrimidine metabolism);00983(Drug metabolism - other enzymes)	K00876	EC:2.7.1.48
1	ENSDARG00000034195	top2b	0.824769	0.687565	0.262493	0.156	0.175	1.58536e-08	0.000439336	DNA topoisomerase II beta [Source:ZFIN;Acc:ZDB-GENE-041008-136]	GO:0000166(nucleotide binding);GO:0000712(resolution of meiotic recombination intermediates);GO:0000819(sister chromatid segregation);GO:0003677(DNA binding);GO:0003916(DNA topoisomerase activity);GO:0003918(DNA topoisomerase type II (ATP-hydrolyzing) activity);GO:0005524(ATP binding);GO:0005634(nucleus);GO:0006259(DNA metabolic process);GO:0006265(DNA topological change);GO:0007412(axon target r…	NA	K03164	EC:5.6.2.2
1	ENSDARG00000059680	fscn1a	0.795262	0.559558	0.507142	0.137	0.078	1.59322e-08	0.000441514	fascin actin-bundling protein 1a [Source:ZFIN;Acc:ZDB-GENE-031009-1]	GO:0001755(neural crest cell migration);GO:0001889(liver development);GO:0003779(actin binding);GO:0005102(signaling receptor binding);GO:0005737(cytoplasm);GO:0005856(cytoskeleton);GO:0007015(actin filament organization);GO:0007163(establishment or maintenance of cell polarity);GO:0007492(endoderm development);GO:0016477(cell migration);GO:0030036(actin cytoskeleton organization);GO:0030674(prot…	NA	K17455	NA
1	ENSDARG00000079939	jmjd1cb	0.979296	0.741578	0.401146	0.198	0.143	1.86027e-08	0.000515518	jumonji domain containing 1Cb [Source:ZFIN;Acc:ZDB-GENE-121214-344]	GO:0000785(chromatin);GO:0000976(transcription regulatory region sequence-specific DNA binding);GO:0005634(nucleus);GO:0030097(hemopoiesis);GO:0031490(chromatin DNA binding);GO:0032454(histone demethylase activity (H3-K9 specific));GO:0033169(histone H3-K9 demethylation);GO:0061515(myeloid cell development)	NA	K11449	EC:1.14.11.-
1	ENSDARG00000018524	midn	2.75269	2.20757	0.318378	0.335	0.372	2.11938e-08	0.000587321	midnolin [Source:ZFIN;Acc:ZDB-GENE-030131-2433]	GO:0005515(protein binding);GO:0005634(nucleus);GO:0005730(nucleolus);GO:0005737(cytoplasm);GO:0005829(cytosol)	NA	NA	NA
1	ENSDARG00000031108	lrba	0.988821	0.779124	0.343857	0.19	0.179	2.17322e-08	0.000602243	LPS-responsive vesicle trafficking, beach and anchor containing [Source:ZFIN;Acc:ZDB-GENE-090311-19]	GO:0005515(protein binding)	NA	NA	NA
1	ENSDARG00000091598	si:ch73-91k6.2	0.961303	0.723896	0.409209	0.198	0.142	2.40773e-08	0.000667231	si:ch73-91k6.2 [Source:ZFIN;Acc:ZDB-GENE-050208-270]	GO:0005795(Golgi stack);GO:0008455(alpha-1,6-mannosylglycoprotein 2-beta-N-acetylglucosaminyltransferase activity);GO:0009312(oligosaccharide biosynthetic process);GO:0016021(integral component of membrane)	NA	NA	NA
1	ENSDARG00000043821	klf7b	1.39949	1.01978	0.456643	0.217	0.197	2.49628e-08	0.000691768	Kruppel-like factor 7b [Source:ZFIN;Acc:ZDB-GENE-041014-171]	GO:0000981(DNA-binding transcription factor activity, RNA polymerase II-specific);GO:0001158(enhancer sequence-specific DNA binding);GO:0003676(nucleic acid binding);GO:0005634(nucleus);GO:0006357(regulation of transcription by RNA polymerase II);GO:0016020(membrane);GO:0016021(integral component of membrane);GO:0021634(optic nerve formation)	NA	K09207	NA
1	ENSDARG00000009031	tnikb	0.685825	0.530935	0.369304	0.133	0.096	2.63037e-08	0.000728929	TRAF2 and NCK interacting kinase b [Source:ZFIN;Acc:ZDB-GENE-051113-320]	GO:0000165(MAPK cascade);GO:0004672(protein kinase activity);GO:0004674(protein serine/threonine kinase activity);GO:0005524(ATP binding);GO:0005737(cytoplasm);GO:0006468(protein phosphorylation);GO:0016301(kinase activity);GO:0016310(phosphorylation);GO:0023014(signal transduction by protein phosphorylation);GO:0031098(stress-activated protein kinase signaling cascade);GO:0032147(activation of p…	NA	NA	NA
1	ENSDARG00000086173	relb	4.43272	3.51204	0.335883	0.513	0.555	2.63301e-08	0.000729661	v-rel avian reticuloendotheliosis viral oncogene homolog B [Source:ZFIN;Acc:ZDB-GENE-030131-9531]	GO:0000122(negative regulation of transcription by RNA polymerase II);GO:0000977(RNA polymerase II regulatory region sequence-specific DNA binding);GO:0000981(DNA-binding transcription factor activity, RNA polymerase II-specific);GO:0003677(DNA binding);GO:0003682(chromatin binding);GO:0003700(DNA-binding transcription factor activity);GO:0005634(nucleus);GO:0005654(nucleoplasm);GO:0005737(cytopl…	04010(MAPK signaling pathway);04625(C-type lectin receptor signaling pathway)	K09253	NA
1	ENSDARG00000102964	axin1	0.779669	0.563405	0.46869	0.156	0.084	2.65187e-08	0.000734887	axin 1 [Source:ZFIN;Acc:ZDB-GENE-000403-1]	GO:0007165(signal transduction);GO:0016055(Wnt signaling pathway);GO:0030159(receptor signaling complex scaffold activity);GO:0030877(beta-catenin destruction complex)	04310(Wnt signaling pathway)	K02157	NA
1	ENSDARG00000005350	dip2ba	0.824754	0.641474	0.362574	0.163	0.134	2.70665e-08	0.000750066	disco-interacting protein 2 homolog Ba [Source:ZFIN;Acc:ZDB-GENE-040426-2305]	GO:0003824(catalytic activity)	NA	NA	NA
1	ENSDARG00000076847	tnrc6c1	2.3353	1.82882	0.352698	0.373	0.345	3.10041e-08	0.000859187	trinucleotide repeat containing 6C1 [Source:ZFIN;Acc:ZDB-GENE-030131-7440]	GO:0000932(P-body);GO:0003676(nucleic acid binding);GO:0003723(RNA binding);GO:0005515(protein binding);GO:0005654(nucleoplasm);GO:0035068(micro-ribonucleoprotein complex);GO:0035195(gene silencing by miRNA);GO:0035278(miRNA mediated inhibition of translation);GO:0060213(positive regulation of nuclear-transcribed mRNA poly(A) tail shortening)	NA	K18412	NA
1	ENSDARG00000091234	si:ch73-335l21.4	2.18894	1.19299	0.875653	0.221	0.133	3.21125e-08	0.000889903	si:ch73-335l21.4 [Source:ZFIN;Acc:ZDB-GENE-160728-105]	NA	NA	NA	NA
1	ENSDARG00000002970	ss18	1.02918	0.836085	0.299778	0.186	0.198	3.22169e-08	0.000892794	synovial sarcoma translocation, chromosome 18 (H. sapiens) [Source:ZFIN;Acc:ZDB-GENE-030131-4867]	GO:0003713(transcription coactivator activity);GO:0005575(cellular_component);GO:0005634(nucleus);GO:0045893(positive regulation of transcription, DNA-templated);GO:0045944(positive regulation of transcription by RNA polymerase II)	NA	NA	NA
1	ENSDARG00000011122	pptc7a	2.07177	1.59927	0.373447	0.373	0.322	3.28771e-08	0.000911091	PTC7 protein phosphatase homolog a [Source:ZFIN;Acc:ZDB-GENE-041114-74]	GO:0003824(catalytic activity)	NA	K17508	EC:3.1.3.16
1	ENSDARG00000058425	rab35b	1.10883	0.838004	0.404014	0.198	0.184	3.29037e-08	0.000911828	RAB35, member RAS oncogene family b [Source:ZFIN;Acc:ZDB-GENE-040801-62]	GO:0000139(Golgi membrane);GO:0003924(GTPase activity);GO:0005525(GTP binding);GO:0005886(plasma membrane);GO:0006886(intracellular protein transport);GO:0010008(endosome membrane);GO:0032456(endocytic recycling);GO:0032482(Rab protein signal transduction)	04144(Endocytosis)	K07876	NA
1	ENSDARG00000012388	cox4i1l	0.733131	0.527483	0.474947	0.167	0.065	3.82228e-08	0.00105923	cytochrome c oxidase subunit 4I1, like [Source:ZFIN;Acc:ZDB-GENE-130814-2]	GO:0004129(cytochrome-c oxidase activity);GO:0005751(mitochondrial respiratory chain complex IV);GO:0006123(mitochondrial electron transport, cytochrome c to oxygen);GO:0016020(membrane);GO:0016021(integral component of membrane);GO:1902600(proton transmembrane transport)	00190(Oxidative phosphorylation);04260(Cardiac muscle contraction)	K02263	NA
1	ENSDARG00000092746	si:ch211-150o23.2	2.99595	2.14789	0.480095	0.403	0.374	3.87653e-08	0.00107426	si:ch211-150o23.2 [Source:ZFIN;Acc:ZDB-GENE-060503-386]	GO:0016020(membrane);GO:0016021(integral component of membrane)	NA	NA	NA
1	ENSDARG00000032575	ywhaz	2.0853	1.71467	0.282326	0.376	0.393	4.75042e-08	0.00131644	tyrosine 3-monooxygenase/tryptophan 5-monooxygenase activation protein, zeta polypeptide [Source:ZFIN;Acc:ZDB-GENE-030131-8554]	GO:0005575(cellular_component);GO:0019904(protein domain specific binding)	04110(Cell cycle);04114(Oocyte meiosis)	K06630	NA
1	ENSDARG00000061547	hist1h4l.10	1.89683	1.45607	0.381503	0.304	0.311	4.80587e-08	0.0013318	histone 1, H4, like [Source:ZFIN;Acc:ZDB-GENE-070927-10]	GO:0000786(nucleosome);GO:0003677(DNA binding);GO:0005634(nucleus);GO:0005694(chromosome);GO:0006352(DNA-templated transcription, initiation);GO:0046982(protein heterodimerization activity)	NA	K11254	NA
1	ENSDARG00000007863	tra2a	1.82155	1.44536	0.333735	0.319	0.332	5.97418e-08	0.00165556	transformer 2 alpha homolog [Source:ZFIN;Acc:ZDB-GENE-040426-1391]	GO:0003676(nucleic acid binding);GO:0003723(RNA binding);GO:0048026(positive regulation of mRNA splicing, via spliceosome);GO:1990904(ribonucleoprotein complex)	03040(Spliceosome)	K12897	NA
1	ENSDARG00000009779	mcl1a	41.9932	34.2182	0.295389	0.989	0.989	6.00174e-08	0.0016632	MCL1, BCL2 family apoptosis regulator a [Source:ZFIN;Acc:ZDB-GENE-000511-7]	GO:0001894(tissue homeostasis);GO:0005741(mitochondrial outer membrane);GO:0007088(regulation of mitotic nuclear division);GO:0008630(intrinsic apoptotic signaling pathway in response to DNA damage);GO:0016020(membrane);GO:0016021(integral component of membrane);GO:0042803(protein homodimerization activity);GO:0042981(regulation of apoptotic process);GO:0043009(chordate embryonic development);GO:…	04210(Apoptosis)	K02539	NA
1	ENSDARG00000016188	SBNO2	1.67886	1.35564	0.308505	0.3	0.305	6.5938e-08	0.00182727	si:ch73-63e15.2 [Source:ZFIN;Acc:ZDB-GENE-091204-463]	GO:0005634(nucleus);GO:0006355(regulation of transcription, DNA-templated);GO:0050727(regulation of inflammatory response)	NA	NA	NA
1	ENSDARG00000099186	slc1a5	1.78783	1.468	0.284355	0.278	0.319	6.59644e-08	0.001828	solute carrier family 1 (neutral amino acid transporter), member 5 [Source:ZFIN;Acc:ZDB-GENE-070501-4]	GO:0015293(symporter activity);GO:0016020(membrane);GO:0016021(integral component of membrane);GO:0055085(transmembrane transport)	NA	K05616	NA
1	ENSDARG00000046106	rab10	2.11965	1.74543	0.280245	0.388	0.409	7.46045e-08	0.00206744	RAB10, member RAS oncogene family [Source:ZFIN;Acc:ZDB-GENE-040718-304]	GO:0003924(GTPase activity);GO:0005525(GTP binding);GO:0005768(endosome);GO:0005794(Golgi apparatus);GO:0005886(plasma membrane);GO:0006886(intracellular protein transport);GO:0006904(vesicle docking involved in exocytosis);GO:0008021(synaptic vesicle);GO:0009306(protein secretion);GO:0017157(regulation of exocytosis);GO:0032482(Rab protein signal transduction);GO:0032593(insulin-responsive compa…	04144(Endocytosis)	K07903	NA
1	ENSDARG00000019160	sh3bp5la	3.22545	2.39707	0.42823	0.433	0.386	7.49525e-08	0.00207708	SH3-binding domain protein 5-like, a [Source:ZFIN;Acc:ZDB-GENE-040426-2187]	GO:0004860(protein kinase inhibitor activity);GO:0005737(cytoplasm);GO:0035556(intracellular signal transduction);GO:0061099(negative regulation of protein tyrosine kinase activity)	NA	NA	NA
1	ENSDARG00000099518	si:ch211-119e14.1	4.61499	3.166	0.543669	0.487	0.44	7.50287e-08	0.0020792	si:ch211-119e14.1 [Source:ZFIN;Acc:ZDB-GENE-141216-162]	GO:0016020(membrane);GO:0016021(integral component of membrane)	NA	NA	NA
1	ENSDARG00000043130	notch2	2.06142	1.64623	0.324466	0.365	0.348	7.53281e-08	0.00208749	notch 2 [Source:ZFIN;Acc:ZDB-GENE-000329-4]	GO:0001889(liver development);GO:0001944(vasculature development);GO:0001946(lymphangiogenesis);GO:0005509(calcium ion binding);GO:0005515(protein binding);GO:0006355(regulation of transcription, DNA-templated);GO:0007219(Notch signaling pathway);GO:0007275(multicellular organism development);GO:0016020(membrane);GO:0016021(integral component of membrane);GO:0030154(cell differentiation);GO:00310…	04330(Notch signaling pathway)	K20994	NA
1	ENSDARG00000089868	si:ch211-112c15.8	0.946819	0.638071	0.569372	0.129	0.083	7.69499e-08	0.00213244	si:ch211-112c15.8 [Source:ZFIN;Acc:ZDB-GENE-141211-78]	GO:0005031(tumor necrosis factor-activated receptor activity);GO:0005515(protein binding);GO:0005739(mitochondrion);GO:0006954(inflammatory response);GO:0007165(signal transduction);GO:0016020(membrane);GO:0016021(integral component of membrane);GO:0033209(tumor necrosis factor-mediated signaling pathway);GO:0043120(tumor necrosis factor binding);GO:0043235(receptor complex);GO:0045121(membrane r…	NA	NA	NA
1	ENSDARG00000103672	cirbpa	10.2856	8.0059	0.361495	0.848	0.836	7.70427e-08	0.00213501	cold inducible RNA binding protein a [Source:ZFIN;Acc:ZDB-GENE-050417-329]	GO:0003676(nucleic acid binding);GO:0003723(RNA binding);GO:0003730(mRNA 3'-UTR binding);GO:0005575(cellular_component);GO:0005681(spliceosomal complex);GO:0005737(cytoplasm);GO:0008266(poly(U) RNA binding);GO:0009409(response to cold);GO:0017148(negative regulation of translation);GO:0030371(translation repressor activity);GO:0045727(positive regulation of translation);GO:0048026(positive regula…	NA	K13195	NA
1	ENSDARG00000058454	dynll1	1.36207	1.10117	0.306765	0.224	0.233	8.05906e-08	0.00223333	dynein, light chain, LC8-type 1 [Source:ZFIN;Acc:ZDB-GENE-040426-1961]	GO:0003774(motor activity);GO:0005737(cytoplasm);GO:0005856(cytoskeleton);GO:0005868(cytoplasmic dynein complex);GO:0005874(microtubule);GO:0005875(microtubule associated complex);GO:0007017(microtubule-based process);GO:0008574(ATP-dependent microtubule motor activity, plus-end-directed);GO:0030286(dynein complex);GO:0045505(dynein intermediate chain binding);GO:0051959(dynein light intermediate…	NA	K10418	NA
1	ENSDARG00000062054	cpt1ab	0.982588	0.674096	0.543632	0.175	0.108	8.20089e-08	0.00227263	carnitine palmitoyltransferase 1Ab (liver) [Source:ZFIN;Acc:ZDB-GENE-030131-3250]	GO:0004095(carnitine O-palmitoyltransferase activity);GO:0005739(mitochondrion);GO:0009437(carnitine metabolic process);GO:0016020(membrane);GO:0016021(integral component of membrane);GO:0016740(transferase activity);GO:0016746(transferase activity, transferring acyl groups)	00071(Fatty acid degradation);03320(PPAR signaling pathway);04920(Adipocytokine signaling pathway)	K08765	EC:2.3.1.21
1	ENSDARG00000054823	id3	8.69556	5.38729	0.690719	0.597	0.496	8.23768e-08	0.00228283	inhibitor of DNA binding 3 [Source:ZFIN;Acc:ZDB-GENE-020515-1]	GO:0001085(RNA polymerase II transcription factor binding);GO:0003700(DNA-binding transcription factor activity);GO:0005634(nucleus);GO:0005737(cytoplasm);GO:0007623(circadian rhythm);GO:0008134(transcription factor binding);GO:0030182(neuron differentiation);GO:0043392(negative regulation of DNA binding);GO:0045665(negative regulation of neuron differentiation);GO:0045892(negative regulation of …	04350(TGF-beta signaling pathway)	K17694	NA
1	ENSDARG00000021811	calm1a	2.92776	2.23883	0.387053	0.392	0.391	9.34692e-08	0.00259022	calmodulin 1a [Source:ZFIN;Acc:ZDB-GENE-030131-8308]	GO:0005509(calcium ion binding);GO:0019722(calcium-mediated signaling);GO:0046872(metal ion binding)	04020(Calcium signaling pathway);04070(Phosphatidylinositol signaling system);04114(Oocyte meiosis);04218(Cellular senescence);04261(Adrenergic signaling in cardiomyocytes);04270(Vascular smooth muscle contraction);04371(Apelin signaling pathway);04625(C-type lectin receptor signaling pathway);04744(Phototransduction);04910(Insulin signaling pathway);04912(GnRH signaling pathway);04916(Melanogene…	K02183	NA
1	ENSDARG00000006314	itgav	0.970235	0.772138	0.329475	0.16	0.161	1.03493e-07	0.002868	integrin, alpha V [Source:ZFIN;Acc:ZDB-GENE-060616-382]	GO:0001525(angiogenesis);GO:0001568(blood vessel development);GO:0001935(endothelial cell proliferation);GO:0005515(protein binding);GO:0007155(cell adhesion);GO:0007229(integrin-mediated signaling pathway);GO:0008305(integrin complex);GO:0016020(membrane);GO:0016021(integral component of membrane);GO:0016477(cell migration);GO:0042074(cell migration involved in gastrulation);GO:0070121(Kupffer's…	04145(Phagosome);04510(Focal adhesion);04512(ECM-receptor interaction);04514(Cell adhesion molecules (CAMs));04810(Regulation of actin cytoskeleton)	K06487	NA
1	ENSDARG00000075536	cpne1	1.83111	1.39382	0.393679	0.319	0.303	1.04632e-07	0.00289956	copine I [Source:ZFIN;Acc:ZDB-GENE-030131-3562]	GO:0005544(calcium-dependent phospholipid binding);GO:0005886(plasma membrane);GO:0043122(regulation of I-kappaB kinase/NF-kappaB signaling);GO:0071277(cellular response to calcium ion);GO:1903265(positive regulation of tumor necrosis factor-mediated signaling pathway)	NA	NA	NA
1	ENSDARG00000075437	shc1	1.15705	0.81776	0.500707	0.224	0.143	1.07854e-07	0.00298886	SHC (Src homology 2 domain containing) transforming protein 1 [Source:ZFIN;Acc:ZDB-GENE-030131-2538]	GO:0001525(angiogenesis);GO:0005515(protein binding);GO:0005886(plasma membrane);GO:0007165(signal transduction);GO:0030971(receptor tyrosine kinase binding);GO:0035556(intracellular signal transduction)	04012(ErbB signaling pathway);04510(Focal adhesion);04910(Insulin signaling pathway)	K06279	NA
1	ENSDARG00000045886	slc38a2	2.19478	1.73735	0.337186	0.369	0.357	1.10712e-07	0.00306805	solute carrier family 38, member 2 [Source:ZFIN;Acc:ZDB-GENE-030131-9659]	GO:0003333(amino acid transmembrane transport);GO:0005886(plasma membrane);GO:0005887(integral component of plasma membrane);GO:0006811(ion transport);GO:0006814(sodium ion transport);GO:0006865(amino acid transport);GO:0015171(amino acid transmembrane transporter activity);GO:0015293(symporter activity);GO:0016020(membrane);GO:0016021(integral component of membrane)	NA	K14207	NA
1	ENSDARG00000099449	atrxl	0.578687	0.474775	0.28554	0.11	0.1	1.15543e-07	0.00320192	alpha thalassemia/mental retardation syndrome X-linked, like [Source:ZFIN;Acc:ZDB-GENE-030131-2019]	GO:0005524(ATP binding);GO:0046872(metal ion binding)	NA	NA	NA
1	ENSDARG00000021647	gnai1	2.60772	1.9696	0.404887	0.414	0.393	1.25265e-07	0.00347133	guanine nucleotide binding protein (G protein), alpha inhibiting activity polypeptide 1 [Source:ZFIN;Acc:ZDB-GENE-040426-1310]	GO:0000166(nucleotide binding);GO:0001664(G protein-coupled receptor binding);GO:0003924(GTPase activity);GO:0005525(GTP binding);GO:0005834(heterotrimeric G-protein complex);GO:0007165(signal transduction);GO:0007186(G protein-coupled receptor signaling pathway);GO:0007188(adenylate cyclase-modulating G protein-coupled receptor signaling pathway);GO:0019001(guanyl nucleotide binding);GO:0031683(…	04261(Adrenergic signaling in cardiomyocytes);04371(Apelin signaling pathway);04540(Gap junction);04914(Progesterone-mediated oocyte maturation);04916(Melanogenesis)	K04630	NA
1	ENSDARG00000102632	ubc	14.7075	11.4802	0.35741	0.905	0.909	1.33962e-07	0.00371236	ubiquitin C [Source:ZFIN;Acc:ZDB-GENE-061110-88]	GO:0003674(molecular_function);GO:0005515(protein binding);GO:0005634(nucleus);GO:0005737(cytoplasm);GO:0016567(protein ubiquitination);GO:0019941(modification-dependent protein catabolic process);GO:0031386(protein tag);GO:0031625(ubiquitin protein ligase binding)	03320(PPAR signaling pathway)	K08770	NA
1	ENSDARG00000091003	il34	2.11281	1.48106	0.512535	0.323	0.173	1.4229e-07	0.00394314	interleukin 34 [Source:ZFIN;Acc:ZDB-GENE-050419-150]	GO:0001934(positive regulation of protein phosphorylation);GO:0005157(macrophage colony-stimulating factor receptor binding);GO:0005615(extracellular space);GO:0008284(positive regulation of cell population proliferation)	04060(Cytokine-cytokine receptor interaction)	K22633	NA
1	ENSDARG00000074060	map3k14a	1.55698	1.19863	0.377367	0.266	0.258	1.42733e-07	0.00395543	mitogen-activated protein kinase kinase kinase 14a [Source:ZFIN;Acc:ZDB-GENE-120215-80]	GO:0004672(protein kinase activity);GO:0004674(protein serine/threonine kinase activity);GO:0005524(ATP binding);GO:0005737(cytoplasm);GO:0006468(protein phosphorylation);GO:0023014(signal transduction by protein phosphorylation);GO:0031098(stress-activated protein kinase signaling cascade);GO:0032147(activation of protein kinase activity)	04010(MAPK signaling pathway);04210(Apoptosis);04625(C-type lectin receptor signaling pathway);04672(Intestinal immune network for IgA production)	K04466	EC:2.7.11.25
1	ENSDARG00000038095	socs1a	0.758903	0.556584	0.447315	0.156	0.073	1.47599e-07	0.00409026	suppressor of cytokine signaling 1a [Source:ZFIN;Acc:ZDB-GENE-040801-205]	GO:0005737(cytoplasm);GO:0005942(phosphatidylinositol 3-kinase complex);GO:0016567(protein ubiquitination);GO:0032868(response to insulin);GO:0035162(embryonic hemopoiesis);GO:0042509(regulation of tyrosine phosphorylation of STAT protein);GO:0043551(regulation of phosphatidylinositol 3-kinase activity);GO:0046426(negative regulation of receptor signaling pathway via JAK-STAT);GO:0046627(negative…	04120(Ubiquitin mediated proteolysis);04910(Insulin signaling pathway)	K04694	NA
1	ENSDARG00000043249	irf1b	3.70116	2.62932	0.493291	0.384	0.382	1.6418e-07	0.00454975	interferon regulatory factor 1b [Source:ZFIN;Acc:ZDB-GENE-041114-13]	GO:0000981(DNA-binding transcription factor activity, RNA polymerase II-specific);GO:0002376(immune system process);GO:0003677(DNA binding);GO:0003700(DNA-binding transcription factor activity);GO:0005515(protein binding);GO:0005634(nucleus);GO:0006355(regulation of transcription, DNA-templated);GO:0006357(regulation of transcription by RNA polymerase II);GO:0006915(apoptotic process);GO:0008285(…	04625(C-type lectin receptor signaling pathway)	K09444	NA
1	ENSDARG00000025350	prdx2	2.82959	2.32795	0.281533	0.475	0.46	1.74382e-07	0.00483248	peroxiredoxin 2 [Source:ZFIN;Acc:ZDB-GENE-030326-2]	GO:0005829(cytosol);GO:0006979(response to oxidative stress);GO:0008379(thioredoxin peroxidase activity);GO:0016209(antioxidant activity);GO:0016491(oxidoreductase activity);GO:0019430(removal of superoxide radicals);GO:0042744(hydrogen peroxide catabolic process);GO:0045321(leukocyte activation);GO:0045454(cell redox homeostasis);GO:0051920(peroxiredoxin activity);GO:0055114(oxidation-reduction …	NA	K03386	EC:1.11.1.15
1	ENSDARG00000003098	kdm5bb	1.08565	0.832278	0.383429	0.232	0.174	1.81625e-07	0.00503319	lysine (K)-specific demethylase 5Bb [Source:ZFIN;Acc:ZDB-GENE-030424-1]	GO:0003677(DNA binding);GO:0005634(nucleus);GO:0046872(metal ion binding)	NA	K11446	EC:1.14.11.-
1	ENSDARG00000029431	si:ch211-147k10.5	1.27198	0.948258	0.423729	0.209	0.17	1.85108e-07	0.00512972	si:ch211-147k10.5 [Source:ZFIN;Acc:ZDB-GENE-120411-9]	GO:0031932(TORC2 complex);GO:0038203(TORC2 signaling)	NA	NA	NA
1	ENSDARG00000038787	tmub1	0.66147	0.515122	0.360761	0.129	0.103	1.86981e-07	0.00518161	transmembrane and ubiquitin-like domain containing 1 [Source:ZFIN;Acc:ZDB-GENE-040426-2504]	GO:0005515(protein binding);GO:0005634(nucleus);GO:0005737(cytoplasm);GO:0016020(membrane);GO:0016021(integral component of membrane);GO:0030433(ubiquitin-dependent ERAD pathway)	NA	NA	NA
1	ENSDARG00000063068	syne1b	2.26321	1.72493	0.391834	0.323	0.331	1.89216e-07	0.00524354	spectrin repeat containing, nuclear envelope 1b [Source:ZFIN;Acc:ZDB-GENE-071218-4]	GO:0003779(actin binding);GO:0005515(protein binding);GO:0005635(nuclear envelope);GO:0005640(nuclear outer membrane);GO:0005737(cytoplasm);GO:0007097(nuclear migration);GO:0007507(heart development);GO:0016020(membrane);GO:0016021(integral component of membrane);GO:0034993(meiotic nuclear membrane microtubule tethering complex);GO:0051015(actin filament binding);GO:0051647(nucleus localization);…	NA	K19326	NA
1	ENSDARG00000079267	im:7154036	1.50685	1.17987	0.352901	0.255	0.266	1.99209e-07	0.00552048	im:7154036 [Source:ZFIN;Acc:ZDB-GENE-080917-11]	GO:0003674(molecular_function);GO:0005575(cellular_component);GO:0007229(integrin-mediated signaling pathway)	NA	NA	NA
1	ENSDARG00000009950	edf1	2.66057	2.13885	0.314902	0.487	0.475	2.03037e-07	0.00562656	endothelial differentiation-related factor 1 [Source:ZFIN;Acc:ZDB-GENE-040426-1710]	GO:0003677(DNA binding);GO:0005634(nucleus);GO:0043565(sequence-specific DNA binding)	NA	K03627	NA
1	ENSDARG00000090054	znf318	0.731528	0.597765	0.291336	0.144	0.133	2.24868e-07	0.00623153	zinc finger protein 318 [Source:ZFIN;Acc:ZDB-GENE-140106-251]	GO:0003676(nucleic acid binding);GO:0008270(zinc ion binding)	NA	NA	NA
1	ENSDARG00000077864	rasgrp3	1.25304	0.922809	0.441332	0.152	0.163	2.27066e-07	0.00629246	RAS guanyl releasing protein 3 (calcium and DAG-regulated) [Source:ZFIN;Acc:ZDB-GENE-070424-82]	GO:0005085(guanyl-nucleotide exchange factor activity);GO:0005096(GTPase activator activity);GO:0005509(calcium ion binding);GO:0005622(intracellular);GO:0007264(small GTPase mediated signal transduction);GO:0007265(Ras protein signal transduction);GO:0035556(intracellular signal transduction);GO:0043087(regulation of GTPase activity);GO:0043547(positive regulation of GTPase activity);GO:0046872(…	04010(MAPK signaling pathway)	K12362	NA
1	ENSDARG00000036785	si:ch211-226m16.2	4.56804	3.50523	0.382067	0.525	0.53	2.61232e-07	0.00723926	si:ch211-226m16.2 [Source:ZFIN;Acc:ZDB-GENE-030131-2302]	GO:0004568(chitinase activity);GO:0005576(extracellular region);GO:0005615(extracellular space);GO:0005737(cytoplasm);GO:0005975(carbohydrate metabolic process);GO:0006032(chitin catabolic process);GO:0008061(chitin binding);GO:0045766(positive regulation of angiogenesis)	NA	NA	NA
1	ENSDARG00000042620	gstr	1.13515	0.905161	0.326639	0.194	0.195	2.66063e-07	0.00737315	glutathione S-transferase rho [Source:ZFIN;Acc:ZDB-GENE-090507-1]	GO:0004364(glutathione transferase activity);GO:0005515(protein binding);GO:0005575(cellular_component);GO:0005737(cytoplasm);GO:0006749(glutathione metabolic process);GO:0016740(transferase activity);GO:0043295(glutathione binding)	00480(Glutathione metabolism);00980(Metabolism of xenobiotics by cytochrome P450);00982(Drug metabolism - cytochrome P450);00983(Drug metabolism - other enzymes)	K00799	EC:2.5.1.18
1	ENSDARG00000058606	sik1	6.03628	4.4569	0.43762	0.631	0.52	2.76818e-07	0.00767118	salt-inducible kinase 1 [Source:ZFIN;Acc:ZDB-GENE-030131-9446]	GO:0004672(protein kinase activity);GO:0004674(protein serine/threonine kinase activity);GO:0005524(ATP binding);GO:0005634(nucleus);GO:0005737(cytoplasm);GO:0006468(protein phosphorylation);GO:0031588(nucleotide-activated protein kinase complex);GO:0032007(negative regulation of TOR signaling);GO:0035556(intracellular signal transduction);GO:0042149(cellular response to glucose starvation)	NA	K19008	EC:2.7.11.1
1	ENSDARG00000015003	arhgap4b	0.682823	0.533282	0.356613	0.148	0.107	2.83466e-07	0.00785542	Rho GTPase activating protein 4b [Source:ZFIN;Acc:ZDB-GENE-090311-38]	GO:0005096(GTPase activator activity);GO:0005515(protein binding);GO:0005737(cytoplasm);GO:0007165(signal transduction);GO:0030336(negative regulation of cell migration);GO:0043547(positive regulation of GTPase activity);GO:0048365(Rac GTPase binding)	NA	NA	NA
1	ENSDARG00000102899	cremb	3.72121	2.93559	0.342123	0.426	0.426	3.11359e-07	0.00862838	cAMP responsive element modulator b [Source:ZFIN;Acc:ZDB-GENE-050417-150]	GO:0003677(DNA binding);GO:0003700(DNA-binding transcription factor activity);GO:0005634(nucleus);GO:0005667(transcription factor complex);GO:0006355(regulation of transcription, DNA-templated)	NA	NA	NA
1	ENSDARG00000073837	senp2	1.18894	0.8859	0.424457	0.213	0.178	3.17359e-07	0.00879466	SUMO specific peptidase 2 [Source:ZFIN;Acc:ZDB-GENE-060810-183]	GO:0005634(nucleus);GO:0006508(proteolysis);GO:0008234(cysteine-type peptidase activity);GO:0016926(protein desumoylation)	03013(RNA transport);04310(Wnt signaling pathway)	K03345	EC:3.4.22.68
1	ENSDARG00000043475	TAGAP	6.00362	4.3719	0.457573	0.646	0.6	3.23257e-07	0.00895809	si:ch211-122h15.4 [Source:ZFIN;Acc:ZDB-GENE-121214-340]	GO:0005096(GTPase activator activity);GO:0007165(signal transduction);GO:0043547(positive regulation of GTPase activity)	NA	K20654	NA
1	ENSDARG00000010873	DDX17	1.28985	1.05402	0.291303	0.243	0.253	3.48047e-07	0.00964508	si:dkey-156n14.5 [Source:ZFIN;Acc:ZDB-GENE-030131-18]	GO:0000166(nucleotide binding);GO:0003676(nucleic acid binding);GO:0004386(helicase activity);GO:0005524(ATP binding);GO:0016787(hydrolase activity)	NA	K13178	EC:3.6.4.13
1	ENSDARG00000093214	si:ch211-284e13.9	1.47563	1.2173	0.277654	0.289	0.259	3.59453e-07	0.00996116	si:ch211-284e13.9 [Source:ZFIN;Acc:ZDB-GENE-060526-164]	GO:0000151(ubiquitin ligase complex);GO:0000209(protein polyubiquitination);GO:0004842(ubiquitin-protein transferase activity);GO:0005737(cytoplasm);GO:0006511(ubiquitin-dependent protein catabolic process);GO:0016567(protein ubiquitination);GO:0016740(transferase activity);GO:0031624(ubiquitin conjugating enzyme binding);GO:0032436(positive regulation of proteasomal ubiquitin-dependent protein c…	NA	NA	NA
1	ENSDARG00000102228	si:dkey-171c9.3	1.56605	1.17139	0.4189	0.232	0.232	3.73184e-07	0.0103417	si:dkey-171c9.3 [Source:ZFIN;Acc:ZDB-GENE-141216-372]	GO:0005737(cytoplasm);GO:0051018(protein kinase A binding)	NA	NA	NA
1	ENSDARG00000089043	ptpn6	2.70234	2.20222	0.295253	0.35	0.371	3.95009e-07	0.0109465	protein tyrosine phosphatase, non-receptor type 6 [Source:ZFIN;Acc:ZDB-GENE-030131-7513]	GO:0004721(phosphoprotein phosphatase activity);GO:0004725(protein tyrosine phosphatase activity);GO:0005737(cytoplasm);GO:0006470(protein dephosphorylation);GO:0016311(dephosphorylation);GO:0016787(hydrolase activity);GO:0016791(phosphatase activity);GO:0035335(peptidyl-tyrosine dephosphorylation);GO:0045087(innate immune response)	04520(Adherens junction)	K05697	EC:3.1.3.48
1	ENSDARG00000109289	mrps15	1.86826	1.55176	0.267795	0.308	0.312	3.99267e-07	0.0110645	mitochondrial ribosomal protein S15 [Source:ZFIN;Acc:ZDB-GENE-040718-188]	GO:0003735(structural constituent of ribosome);GO:0005622(intracellular);GO:0005739(mitochondrion);GO:0005763(mitochondrial small ribosomal subunit);GO:0005840(ribosome);GO:0006412(translation)	03010(Ribosome)	K02956	NA
1	ENSDARG00000101251	ldha	7.22308	5.86232	0.301143	0.677	0.692	4.18761e-07	0.0116047	lactate dehydrogenase A4 [Source:ZFIN;Acc:ZDB-GENE-991026-5]	GO:0001666(response to hypoxia);GO:0003824(catalytic activity);GO:0004459(L-lactate dehydrogenase activity);GO:0005737(cytoplasm);GO:0005975(carbohydrate metabolic process);GO:0016491(oxidoreductase activity);GO:0016616(oxidoreductase activity, acting on the CH-OH group of donors, NAD or NADP as acceptor);GO:0019752(carboxylic acid metabolic process);GO:0055114(oxidation-reduction process)	00010(Glycolysis / Gluconeogenesis);00270(Cysteine and methionine metabolism);00620(Pyruvate metabolism);00640(Propanoate metabolism)	K00016	EC:1.1.1.27
1	ENSDARG00000101755	prkar1ab	1.34807	1.10267	0.289893	0.266	0.247	4.20593e-07	0.0116555	protein kinase, cAMP-dependent, regulatory, type I, alpha (tissue specific extinguisher 1) b [Source:ZFIN;Acc:ZDB-GENE-050417-238]	GO:0000166(nucleotide binding);GO:0001932(regulation of protein phosphorylation);GO:0005829(cytosol);GO:0005952(cAMP-dependent protein kinase complex);GO:0008603(cAMP-dependent protein kinase regulator activity);GO:0019934(cGMP-mediated signaling);GO:0030552(cAMP binding);GO:0045859(regulation of protein kinase activity);GO:0047555(3',5'-cyclic-GMP phosphodiesterase activity)	04910(Insulin signaling pathway)	K04739	NA
1	ENSDARG00000089307	pmaip1	2.5926	2.05	0.338773	0.35	0.316	4.23833e-07	0.0117453	phorbol-12-myristate-13-acetate-induced protein 1 [Source:ZFIN;Acc:ZDB-GENE-070119-3]	GO:0001836(release of cytochrome c from mitochondria);GO:0005575(cellular_component);GO:0006915(apoptotic process);GO:0006919(activation of cysteine-type endopeptidase activity involved in apoptotic process);GO:0006974(cellular response to DNA damage stimulus);GO:0007088(regulation of mitotic nuclear division);GO:0042981(regulation of apoptotic process);GO:0043065(positive regulation of apoptotic…	04115(p53 signaling pathway);04210(Apoptosis)	K10131	NA
1	ENSDARG00000016200	trib3	1.80998	1.33944	0.434342	0.331	0.271	4.37545e-07	0.0121252	tribbles pseudokinase 3 [Source:ZFIN;Acc:ZDB-GENE-040426-2609]	GO:0001947(heart looping);GO:0003714(transcription corepressor activity);GO:0004672(protein kinase activity);GO:0005524(ATP binding);GO:0005634(nucleus);GO:0006468(protein phosphorylation);GO:0007368(determination of left/right symmetry);GO:0031434(mitogen-activated protein kinase kinase binding);GO:0032436(positive regulation of proteasomal ubiquitin-dependent protein catabolic process);GO:00434…	NA	K19518	NA
1	ENSDARG00000092903	zgc:153317	2.1717	1.65003	0.39633	0.319	0.31	4.66009e-07	0.0129141	zgc:153317 [Source:ZFIN;Acc:ZDB-GENE-060825-309]	GO:0004129(cytochrome-c oxidase activity);GO:0005751(mitochondrial respiratory chain complex IV);GO:0008150(biological_process);GO:0016020(membrane);GO:0016021(integral component of membrane);GO:0022900(electron transport chain);GO:1902600(proton transmembrane transport)	NA	NA	NA
1	ENSDARG00000052638	fam210b	0.937136	0.657498	0.511272	0.144	0.102	4.71855e-07	0.0130761	family with sequence similarity 210 member B [Source:ZFIN;Acc:ZDB-GENE-050913-122]	GO:0003674(molecular_function);GO:0008150(biological_process)	NA	NA	NA
1	ENSDARG00000015149	wasa	2.89689	2.34569	0.304494	0.403	0.42	4.90656e-07	0.0135971	Wiskott-Aldrich syndrome (eczema-thrombocytopenia) a [Source:ZFIN;Acc:ZDB-GENE-081104-419]	GO:0000147(actin cortical patch assembly);GO:0003779(actin binding);GO:0005884(actin filament);GO:0006897(endocytosis);GO:0007015(actin filament organization);GO:0030048(actin filament-based movement);GO:0030479(actin cortical patch);GO:0051015(actin filament binding);GO:0051127(positive regulation of actin nucleation);GO:0051666(actin cortical patch localization);GO:2000601(positive regulation o…	04144(Endocytosis);04520(Adherens junction);04530(Tight junction);04810(Regulation of actin cytoskeleton);05132(Salmonella infection)	K05747	NA
1	ENSDARG00000054973	itsn2b	1.04099	0.861789	0.272555	0.194	0.197	5.33825e-07	0.0147934	intersectin 2b [Source:ZFIN;Acc:ZDB-GENE-050309-102]	GO:0005089(Rho guanyl-nucleotide exchange factor activity);GO:0005509(calcium ion binding);GO:0005515(protein binding);GO:0006897(endocytosis);GO:0035023(regulation of Rho protein signal transduction)	NA	K20045	NA
1	ENSDARG00000052091	rbpjb	0.794725	0.599177	0.407475	0.137	0.101	5.55106e-07	0.0153831	recombination signal binding protein for immunoglobulin kappa J region b [Source:ZFIN;Acc:ZDB-GENE-070319-1]	GO:0000122(negative regulation of transcription by RNA polymerase II);GO:0000978(RNA polymerase II proximal promoter sequence-specific DNA binding);GO:0001103(RNA polymerase II repressing transcription factor binding);GO:0001228(DNA-binding transcription activator activity, RNA polymerase II-specific);GO:0001756(somitogenesis);GO:0002040(sprouting angiogenesis);GO:0002193(MAML1-RBP-Jkappa- ICN1 c…	04330(Notch signaling pathway)	K06053	NA
1	ENSDARG00000044561	ccr7	0.713105	0.486141	0.55274	0.106	0.034	5.65299e-07	0.0156656	chemokine (C-C motif) receptor 7 [Source:ZFIN;Acc:ZDB-GENE-060522-2]	GO:0004930(G protein-coupled receptor activity);GO:0004950(chemokine receptor activity);GO:0006935(chemotaxis);GO:0006955(immune response);GO:0007165(signal transduction);GO:0007186(G protein-coupled receptor signaling pathway);GO:0007204(positive regulation of cytosolic calcium ion concentration);GO:0009897(external side of plasma membrane);GO:0009953(dorsal/ventral pattern formation);GO:0016020…	04060(Cytokine-cytokine receptor interaction)	K04182	NA
1	ENSDARG00000101609	si:dkey-109a10.2	4.02174	2.9026	0.470474	0.426	0.35	6.14238e-07	0.0170218	si:dkey-109a10.2 [Source:ZFIN;Acc:ZDB-GENE-141212-404]	GO:0016020(membrane);GO:0016021(integral component of membrane)	NA	NA	NA
1	ENSDARG00000103483	litaf	3.87171	3.17036	0.288323	0.57	0.571	6.60988e-07	0.0183173	lipopolysaccharide-induced TNF factor [Source:ZFIN;Acc:ZDB-GENE-040704-23]	GO:0000139(Golgi membrane);GO:0003677(DNA binding);GO:0005634(nucleus);GO:0005737(cytoplasm);GO:0005764(lysosome);GO:0005765(lysosomal membrane);GO:0005768(endosome);GO:0005794(Golgi apparatus);GO:0005886(plasma membrane);GO:0008270(zinc ion binding);GO:0009898(cytoplasmic side of plasma membrane);GO:0010008(endosome membrane);GO:0016020(membrane);GO:0031901(early endosome membrane);GO:0031902(la…	04142(Lysosome)	K19363	NA
1	ENSDARG00000078647	samsn1b	1.56774	1.04885	0.579874	0.243	0.137	6.63751e-07	0.0183939	SAM domain, SH3 domain and nuclear localisation signals 1b [Source:ZFIN;Acc:ZDB-GENE-041010-135]	GO:0003674(molecular_function);GO:0005515(protein binding);GO:0005575(cellular_component);GO:0008150(biological_process)	NA	NA	NA
1	ENSDARG00000061735	hnrnpm	1.17072	0.971134	0.269657	0.213	0.228	7.29968e-07	0.0202289	heterogeneous nuclear ribonucleoprotein M [Source:ZFIN;Acc:ZDB-GENE-030131-6898]	GO:0000398(mRNA splicing, via spliceosome);GO:0003676(nucleic acid binding);GO:0003723(RNA binding);GO:0003729(mRNA binding);GO:0005634(nucleus);GO:0005737(cytoplasm);GO:0071014(post-mRNA release spliceosomal complex);GO:1990904(ribonucleoprotein complex);GO:2000815(regulation of mRNA stability involved in response to oxidative stress)	03040(Spliceosome)	K12887	NA
1	ENSDARG00000010384	lpar5a	1.88716	1.39712	0.433758	0.27	0.251	8.04904e-07	0.0223055	lysophosphatidic acid receptor 5a [Source:ZFIN;Acc:ZDB-GENE-030131-1193]	GO:0004930(G protein-coupled receptor activity);GO:0007186(G protein-coupled receptor signaling pathway);GO:0016020(membrane);GO:0016021(integral component of membrane)	NA	NA	NA
1	ENSDARG00000037919	rbbp6	3.87402	3.21501	0.269009	0.529	0.553	8.0502e-07	0.0223087	retinoblastoma binding protein 6 [Source:ZFIN;Acc:ZDB-GENE-040930-5]	GO:0003676(nucleic acid binding);GO:0004842(ubiquitin-protein transferase activity);GO:0006397(mRNA processing);GO:0008270(zinc ion binding);GO:0016567(protein ubiquitination);GO:0061630(ubiquitin protein ligase activity)	NA	NA	NA
1	ENSDARG00000020573	ddx3xa	3.6518	3.04705	0.261197	0.513	0.554	8.41354e-07	0.0233156	DEAD-box helicase 3 X-linked a [Source:ZFIN;Acc:ZDB-GENE-030131-1565]	GO:0000166(nucleotide binding);GO:0003676(nucleic acid binding);GO:0004386(helicase activity);GO:0005524(ATP binding);GO:0016787(hydrolase activity)	04622(RIG-I-like receptor signaling pathway)	K11594	EC:3.6.4.13
1	ENSDARG00000099184	map2k6	0.956236	0.724938	0.399509	0.152	0.149	8.60768e-07	0.0238536	mitogen-activated protein kinase kinase 6 [Source:ZFIN;Acc:ZDB-GENE-010202-3]	GO:0000165(MAPK cascade);GO:0000166(nucleotide binding);GO:0000187(activation of MAPK activity);GO:0004672(protein kinase activity);GO:0004674(protein serine/threonine kinase activity);GO:0004708(MAP kinase kinase activity);GO:0005524(ATP binding);GO:0005634(nucleus);GO:0005737(cytoplasm);GO:0005856(cytoskeleton);GO:0006468(protein phosphorylation);GO:0016301(kinase activity);GO:0016310(phosphory…	04010(MAPK signaling pathway);04218(Cellular senescence);04620(Toll-like receptor signaling pathway);04912(GnRH signaling pathway)	K04433	EC:2.7.12.2
1	ENSDARG00000099465	rnf213a	4.0153	3.05423	0.394697	0.46	0.483	8.76808e-07	0.0242981	ring finger protein 213a [Source:ZFIN;Acc:ZDB-GENE-050302-100]	GO:0001525(angiogenesis);GO:0002040(sprouting angiogenesis);GO:0004842(ubiquitin-protein transferase activity);GO:0005737(cytoplasm);GO:0005829(cytosol);GO:0006511(ubiquitin-dependent protein catabolic process);GO:0008015(blood circulation);GO:0016567(protein ubiquitination);GO:0016740(transferase activity);GO:0016787(hydrolase activity);GO:0016887(ATPase activity);GO:0046872(metal ion binding)	NA	K22754	EC:2.3.2.27
1	ENSDARG00000036482	hexim1	2.06267	1.65702	0.315917	0.369	0.373	9.81139e-07	0.0271893	HEXIM P-TEFb complex subunit 1 [Source:ZFIN;Acc:ZDB-GENE-030131-4637]	GO:0000122(negative regulation of transcription by RNA polymerase II);GO:0004861(cyclin-dependent protein serine/threonine kinase inhibitor activity);GO:0005634(nucleus);GO:0005737(cytoplasm);GO:0017069(snRNA binding);GO:0045736(negative regulation of cyclin-dependent protein serine/threonine kinase activity)	NA	K15189	NA
1	ENSDARG00000070981	ash1l	0.935662	0.760156	0.299692	0.186	0.174	1.01837e-06	0.0282211	ash1 (absent, small, or homeotic)-like (Drosophila) [Source:ZFIN;Acc:ZDB-GENE-030131-6101]	GO:0003677(DNA binding);GO:0003682(chromatin binding);GO:0005515(protein binding);GO:0005634(nucleus);GO:0008168(methyltransferase activity);GO:0016740(transferase activity);GO:0018024(histone-lysine N-methyltransferase activity);GO:0032259(methylation);GO:0034968(histone lysine methylation);GO:0046872(metal ion binding)	00310(Lysine degradation)	K06101	EC:2.1.1.43
1	ENSDARG00000102887	abhd4	0.941305	0.68731	0.453701	0.163	0.125	1.05197e-06	0.0291523	abhydrolase domain containing 4 [Source:ZFIN;Acc:ZDB-GENE-050417-83]	GO:0005811(lipid droplet);GO:0052689(carboxylic ester hydrolase activity);GO:0055088(lipid homeostasis)	NA	K13698	NA
1	ENSDARG00000098654	FQ976914.1	0.753362	0.556626	0.436636	0.148	0.089	1.18729e-06	0.0329023	raftlin-like [Source:NCBI gene;Acc:101885083]	NA	NA	NA	NA
1	ENSDARG00000055276	rel	8.33406	6.8482	0.283295	0.677	0.714	1.27499e-06	0.0353325	v-rel avian reticuloendotheliosis viral oncogene homolog [Source:ZFIN;Acc:ZDB-GENE-040718-255]	GO:0000122(negative regulation of transcription by RNA polymerase II);GO:0000977(RNA polymerase II regulatory region sequence-specific DNA binding);GO:0000981(DNA-binding transcription factor activity, RNA polymerase II-specific);GO:0003677(DNA binding);GO:0003682(chromatin binding);GO:0003700(DNA-binding transcription factor activity);GO:0005634(nucleus);GO:0005654(nucleoplasm);GO:0005737(cytopl…	NA	K09254	NA
1	ENSDARG00000043447	gpr55a	0.777109	0.643669	0.271796	0.129	0.118	1.28341e-06	0.0355658	G protein-coupled receptor 55a [Source:ZFIN;Acc:ZDB-GENE-051113-260]	GO:0004930(G protein-coupled receptor activity);GO:0005887(integral component of plasma membrane);GO:0007186(G protein-coupled receptor signaling pathway);GO:0016020(membrane);GO:0016021(integral component of membrane);GO:0035025(positive regulation of Rho protein signal transduction);GO:0051482(positive regulation of cytosolic calcium ion concentration involved in phospholipase C-activating G pr…	NA	NA	NA
1	ENSDARG00000087277	selenoj	1.23566	1.01015	0.290711	0.224	0.229	1.37196e-06	0.0380197	selenoprotein J [Source:ZFIN;Acc:ZDB-GENE-030131-4163]	NA	NA	NA	NA
1	ENSDARG00000029818	srsf5a	3.15274	2.60541	0.275092	0.464	0.489	1.37894e-06	0.0382132	serine and arginine rich splicing factor 5a [Source:ZFIN;Acc:ZDB-GENE-030131-7336]	GO:0003676(nucleic acid binding);GO:0003723(RNA binding);GO:0005575(cellular_component);GO:0008150(biological_process)	03040(Spliceosome);05168(Herpes simplex virus 1 infection)	K12893	NA
1	ENSDARG00000061233	abcc5	1.00067	0.758614	0.399527	0.183	0.154	1.39205e-06	0.0385765	ATP-binding cassette, sub-family C (CFTR/MRP), member 5 [Source:ZFIN;Acc:ZDB-GENE-050517-17]	GO:0000166(nucleotide binding);GO:0005524(ATP binding);GO:0008514(organic anion transmembrane transporter activity);GO:0015711(organic anion transport);GO:0016020(membrane);GO:0016021(integral component of membrane);GO:0016887(ATPase activity);GO:0030218(erythrocyte differentiation);GO:0035351(heme transmembrane transport);GO:0042626(ATPase activity, coupled to transmembrane movement of substance…	02010(ABC transporters)	K05668	NA
1	ENSDARG00000002396	cry-dash	0.668839	0.554219	0.271203	0.114	0.117	1.63786e-06	0.0453885	cryptochrome DASH [Source:ZFIN;Acc:ZDB-GENE-040617-2]	GO:0003913(DNA photolyase activity);GO:0006281(DNA repair)	NA	K01669	EC:4.1.99.3
1	ENSDARG00000079369	si:ch211-212g7.6	1.96736	1.62703	0.274015	0.285	0.302	1.72069e-06	0.0476839	si:ch211-212g7.6 [Source:ZFIN;Acc:ZDB-GENE-030131-4695]	GO:0016020(membrane);GO:0016021(integral component of membrane)	NA	NA	NA
1	ENSDARG00000103900	sept9b	0.997489	0.725179	0.459964	0.209	0.127	1.84155e-06	0.0510331	septin 9b [Source:ZFIN;Acc:ZDB-GENE-050327-17]	GO:0000166(nucleotide binding);GO:0003924(GTPase activity);GO:0005525(GTP binding);GO:0005940(septin ring);GO:0015630(microtubule cytoskeleton);GO:0031105(septin complex);GO:0032947(protein-containing complex scaffold activity);GO:0061640(cytoskeleton-dependent cytokinesis)	NA	K16938	NA
1	ENSDARG00000093313	ubb	3.44369	2.68932	0.356717	0.49	0.482	1.84604e-06	0.0511573	ubiquitin B [Source:ZFIN;Acc:ZDB-GENE-050411-10]	GO:0003674(molecular_function);GO:0005515(protein binding);GO:0005634(nucleus);GO:0005737(cytoplasm);GO:0016567(protein ubiquitination);GO:0019941(modification-dependent protein catabolic process);GO:0031386(protein tag);GO:0031625(ubiquitin protein ligase binding)	03320(PPAR signaling pathway)	K08770	NA
1	ENSDARG00000101030	si:ch73-158p21.3	1.08686	0.862033	0.334352	0.179	0.163	1.85951e-06	0.0515308	si:ch73-158p21.3 [Source:ZFIN;Acc:ZDB-GENE-030131-4747]	GO:0006955(immune response);GO:0016020(membrane);GO:0019882(antigen processing and presentation);GO:0042613(MHC class II protein complex)	NA	NA	NA
1	ENSDARG00000058232	fbrsl1	0.887447	0.737195	0.267615	0.167	0.149	1.99951e-06	0.0554104	fibrosin-like 1 [Source:ZFIN;Acc:ZDB-GENE-070705-487]	NA	NA	NA	NA
1	ENSDARG00000012399	adssl	1.25219	1.02141	0.29389	0.255	0.229	2.255e-06	0.0624907	adenylosuccinate synthase, like [Source:ZFIN;Acc:ZDB-GENE-020419-28]	GO:0000166(nucleotide binding);GO:0000287(magnesium ion binding);GO:0004019(adenylosuccinate synthase activity);GO:0005525(GTP binding);GO:0005737(cytoplasm);GO:0006164(purine nucleotide biosynthetic process);GO:0006167(AMP biosynthetic process);GO:0016874(ligase activity);GO:0044208('de novo' AMP biosynthetic process);GO:0046040(IMP metabolic process);GO:0046872(metal ion binding)	00230(Purine metabolism);00250(Alanine, aspartate and glutamate metabolism)	K01939	EC:6.3.4.4
1	ENSDARG00000094492	si:ch211-284e13.12	1.16894	0.826535	0.500049	0.179	0.123	2.28971e-06	0.0634524	si:ch211-284e13.12 [Source:ZFIN;Acc:ZDB-GENE-060526-158]	GO:0000151(ubiquitin ligase complex);GO:0000209(protein polyubiquitination);GO:0004842(ubiquitin-protein transferase activity);GO:0005737(cytoplasm);GO:0006511(ubiquitin-dependent protein catabolic process);GO:0016567(protein ubiquitination);GO:0016740(transferase activity);GO:0031624(ubiquitin conjugating enzyme binding);GO:0032436(positive regulation of proteasomal ubiquitin-dependent protein c…	NA	NA	NA
1	ENSDARG00000041394	dnajb1b	2.52507	1.72937	0.546077	0.289	0.237	2.30906e-06	0.0639886	DnaJ heat shock protein family (Hsp40) member B1b [Source:ZFIN;Acc:ZDB-GENE-030131-5455]	GO:0000122(negative regulation of transcription by RNA polymerase II);GO:0002088(lens development in camera-type eye);GO:0005575(cellular_component);GO:0005829(cytosol);GO:0006457(protein folding);GO:0051082(unfolded protein binding);GO:0051085(chaperone cofactor-dependent protein refolding);GO:0051087(chaperone binding)	04141(Protein processing in endoplasmic reticulum)	K09507	NA
1	ENSDARG00000011334	ncaldb	3.39451	2.78469	0.28569	0.471	0.459	2.33066e-06	0.0645874	neurocalcin delta b [Source:ZFIN;Acc:ZDB-GENE-040808-37]	GO:0005509(calcium ion binding);GO:0005575(cellular_component);GO:0046872(metal ion binding);GO:0048841(regulation of axon extension involved in axon guidance)	NA	NA	NA
1	ENSDARG00000103049	CR392341.4	1.25841	0.783512	0.683578	0.148	0.089	2.33624e-06	0.0647419	uncharacterized LOC103911752 [Source:NCBI gene;Acc:103911752]	GO:0005615(extracellular space);GO:0005886(plasma membrane);GO:0006955(immune response);GO:0009897(external side of plasma membrane);GO:0016020(membrane);GO:0016021(integral component of membrane)	NA	NA	NA
1	ENSDARG00000029445	zgc:56676	1.36391	1.12837	0.273513	0.285	0.287	2.46587e-06	0.0683342	zgc:56676 [Source:ZFIN;Acc:ZDB-GENE-040426-1109]	GO:0003723(RNA binding);GO:0003743(translation initiation factor activity);GO:0005575(cellular_component);GO:0006413(translational initiation);GO:0016282(eukaryotic 43S preinitiation complex);GO:0043024(ribosomal small subunit binding)	03013(RNA transport)	K03113	NA
1	ENSDARG00000026664	uri1	0.655116	0.543447	0.269609	0.137	0.128	2.54572e-06	0.070547	URI1, prefoldin-like chaperone [Source:ZFIN;Acc:ZDB-GENE-050913-30]	GO:0000122(negative regulation of transcription by RNA polymerase II);GO:0003682(chromatin binding);GO:0003714(transcription corepressor activity);GO:0010923(negative regulation of phosphatase activity);GO:0019212(phosphatase inhibitor activity)	NA	K17560	NA
1	ENSDARG00000104153	prkd4	1.10349	0.809835	0.446372	0.205	0.153	2.65646e-06	0.0736159	protein kinase D4 [Source:ZFIN;Acc:ZDB-GENE-080204-93]	GO:0000166(nucleotide binding);GO:0004672(protein kinase activity);GO:0004674(protein serine/threonine kinase activity);GO:0004697(protein kinase C activity);GO:0005524(ATP binding);GO:0006468(protein phosphorylation);GO:0016301(kinase activity);GO:0016310(phosphorylation);GO:0016740(transferase activity);GO:0035556(intracellular signal transduction);GO:0046872(metal ion binding);GO:0089700(prote…	NA	NA	NA
1	ENSDARG00000024940	rnf144b	0.725529	0.597991	0.27891	0.137	0.132	2.66058e-06	0.07373	ring finger protein 144B [Source:ZFIN;Acc:ZDB-GENE-040426-1292]	GO:0000151(ubiquitin ligase complex);GO:0000209(protein polyubiquitination);GO:0004842(ubiquitin-protein transferase activity);GO:0005737(cytoplasm);GO:0006511(ubiquitin-dependent protein catabolic process);GO:0016020(membrane);GO:0016021(integral component of membrane);GO:0016567(protein ubiquitination);GO:0016740(transferase activity);GO:0031624(ubiquitin conjugating enzyme binding);GO:0032436(…	NA	K11975	EC:2.3.2.31
1	ENSDARG00000100055	tox2	2.09131	1.51136	0.46856	0.354	0.236	2.72215e-06	0.0754362	TOX high mobility group box family member 2 [Source:ZFIN;Acc:ZDB-GENE-040426-2095]	GO:0003677(DNA binding);GO:0005634(nucleus);GO:0072357(PTW/PP1 phosphatase complex)	NA	NA	NA
1	ENSDARG00000105592	CR936442.1	25.4037	15.9956	0.667362	0.703	0.723	2.81244e-06	0.0779383	NA	NA	NA	NA	NA
1	ENSDARG00000040452	fam214a	0.61731	0.453242	0.445715	0.125	0.057	2.95541e-06	0.0819003	family with sequence similarity 214 member A [Source:ZFIN;Acc:ZDB-GENE-050419-204]	NA	NA	NA	NA
1	ENSDARG00000021488	cyth1b	0.625539	0.522378	0.260005	0.114	0.116	3.10858e-06	0.086145	cytohesin 1b [Source:ZFIN;Acc:ZDB-GENE-030131-4311]	GO:0005086(ARF guanyl-nucleotide exchange factor activity);GO:0032012(regulation of ARF protein signal transduction);GO:0055113(epiboly involved in gastrulation with mouth forming second)	04144(Endocytosis)	K18441	NA
1	ENSDARG00000053468	adam10a	1.47248	1.19209	0.304754	0.251	0.263	3.15322e-06	0.0873821	ADAM metallopeptidase domain 10a [Source:ZFIN;Acc:ZDB-GENE-040917-2]	GO:0004222(metalloendopeptidase activity);GO:0006508(proteolysis);GO:0006509(membrane protein ectodomain proteolysis);GO:0007219(Notch signaling pathway);GO:0008237(metallopeptidase activity);GO:0016020(membrane);GO:0016021(integral component of membrane)	NA	K06704	EC:3.4.24.81
1	ENSDARG00000011824	pbxip1b	1.61455	1.24118	0.379415	0.262	0.242	3.26597e-06	0.0905065	pre-B-cell leukemia homeobox interacting protein 1b [Source:ZFIN;Acc:ZDB-GENE-070112-2032]	GO:0003714(transcription corepressor activity);GO:0016020(membrane);GO:0016021(integral component of membrane);GO:0030154(cell differentiation);GO:0045892(negative regulation of transcription, DNA-templated)	NA	NA	NA
1	ENSDARG00000014439	dgkza	1.47084	1.1358	0.372933	0.274	0.224	3.30447e-06	0.0915735	diacylglycerol kinase, zeta a [Source:ZFIN;Acc:ZDB-GENE-111104-3]	GO:0000166(nucleotide binding);GO:0003951(NAD+ kinase activity);GO:0004143(diacylglycerol kinase activity);GO:0005515(protein binding);GO:0005524(ATP binding);GO:0005634(nucleus);GO:0007165(signal transduction);GO:0007205(protein kinase C-activating G protein-coupled receptor signaling pathway);GO:0016301(kinase activity);GO:0016310(phosphorylation);GO:0016740(transferase activity);GO:0035556(int…	00561(Glycerolipid metabolism);00564(Glycerophospholipid metabolism);04070(Phosphatidylinositol signaling system)	K00901	EC:2.7.1.107
1	ENSDARG00000035556	rps6ka3a	0.573702	0.477812	0.263859	0.103	0.098	3.3755e-06	0.093542	ribosomal protein S6 kinase a, polypeptide 3a [Source:ZFIN;Acc:ZDB-GENE-030219-119]	GO:0000166(nucleotide binding);GO:0000287(magnesium ion binding);GO:0004672(protein kinase activity);GO:0004674(protein serine/threonine kinase activity);GO:0004711(ribosomal protein S6 kinase activity);GO:0005524(ATP binding);GO:0006468(protein phosphorylation);GO:0016301(kinase activity);GO:0016310(phosphorylation);GO:0016740(transferase activity);GO:0035556(intracellular signal transduction);G…	04010(MAPK signaling pathway);04114(Oocyte meiosis);04150(mTOR signaling pathway);04914(Progesterone-mediated oocyte maturation)	K04373	EC:2.7.11.1
1	ENSDARG00000006266	stat1a	7.04482	5.83445	0.271966	0.711	0.691	3.48563e-06	0.0965937	signal transducer and activator of transcription 1a [Source:ZFIN;Acc:ZDB-GENE-980526-499]	GO:0003677(DNA binding);GO:0003700(DNA-binding transcription factor activity);GO:0005634(nucleus);GO:0005737(cytoplasm);GO:0006355(regulation of transcription, DNA-templated);GO:0007165(signal transduction)	04217(Necroptosis);04620(Toll-like receptor signaling pathway);04621(NOD-like receptor signaling pathway);04625(C-type lectin receptor signaling pathway);04933(AGE-RAGE signaling pathway in diabetic complications);05168(Herpes simplex virus 1 infection)	K11220	NA
1	ENSDARG00000059836	ddit3	3.47145	2.88849	0.265225	0.433	0.474	3.58958e-06	0.0994745	DNA-damage-inducible transcript 3 [Source:ZFIN;Acc:ZDB-GENE-070410-90]	GO:0001666(response to hypoxia);GO:0003700(DNA-binding transcription factor activity);GO:0006355(regulation of transcription, DNA-templated);GO:0046890(regulation of lipid biosynthetic process);GO:0070059(intrinsic apoptotic signaling pathway in response to endoplasmic reticulum stress)	NA	NA	NA
1	ENSDARG00000040059	gbp	0.951828	0.755162	0.333915	0.175	0.149	3.94548e-06	0.109337	glycogen synthase kinase binding protein [Source:ZFIN;Acc:ZDB-GENE-990714-7]	GO:0005737(cytoplasm);GO:0016301(kinase activity);GO:0016310(phosphorylation)	04310(Wnt signaling pathway)	K03096	NA
1	ENSDARG00000081270	rn7sk	5.59483	4.45308	0.32929	0.483	0.533	4.00783e-06	0.111065	RNA, 7SK small nuclear [Source:ZFIN;Acc:ZDB-GENE-090323-1]	NA	NA	NA	NA
1	ENSDARG00000068582	rnf44	1.06533	0.850699	0.32458	0.175	0.176	4.23845e-06	0.117456	ring finger protein 44 [Source:ZFIN;Acc:ZDB-GENE-060929-604]	GO:0046872(metal ion binding)	NA	K19041	EC:2.3.2.27
1	ENSDARG00000105408	BX248082.1	1.41952	1.01866	0.478732	0.228	0.157	4.26498e-06	0.118191	NA	NA	NA	NA	NA
1	ENSDARG00000076297	nfatc3a	0.653808	0.483171	0.436333	0.125	0.065	4.49486e-06	0.124561	nuclear factor of activated T cells 3a [Source:ZFIN;Acc:ZDB-GENE-041111-41]	GO:0000978(RNA polymerase II proximal promoter sequence-specific DNA binding);GO:0001816(cytokine production);GO:0003677(DNA binding);GO:0003682(chromatin binding);GO:0003700(DNA-binding transcription factor activity);GO:0005634(nucleus);GO:0005667(transcription factor complex);GO:0005829(cytosol);GO:0006355(regulation of transcription, DNA-templated);GO:0008134(transcription factor binding);GO:0…	04010(MAPK signaling pathway);04218(Cellular senescence);04310(Wnt signaling pathway);04625(C-type lectin receptor signaling pathway)	K17333	NA
1	ENSDARG00000100020	pim1	2.3733	1.6974	0.483563	0.304	0.28	4.5933e-06	0.12729	Pim-1 proto-oncogene, serine/threonine kinase [Source:ZFIN;Acc:ZDB-GENE-061013-139]	GO:0000166(nucleotide binding);GO:0004672(protein kinase activity);GO:0004674(protein serine/threonine kinase activity);GO:0005524(ATP binding);GO:0005737(cytoplasm);GO:0006468(protein phosphorylation);GO:0007634(optokinetic behavior);GO:0016301(kinase activity);GO:0016310(phosphorylation);GO:0016740(transferase activity);GO:0043066(negative regulation of apoptotic process);GO:0046777(protein aut…	04933(AGE-RAGE signaling pathway in diabetic complications)	K04702	EC:2.7.11.1
1	ENSDARG00000016809	prkacab	0.963057	0.759139	0.343258	0.194	0.176	4.94785e-06	0.137115	protein kinase, cAMP-dependent, catalytic, alpha, genome duplicate b [Source:ZFIN;Acc:ZDB-GENE-040801-208]	GO:0000166(nucleotide binding);GO:0004672(protein kinase activity);GO:0004674(protein serine/threonine kinase activity);GO:0005524(ATP binding);GO:0005575(cellular_component);GO:0006468(protein phosphorylation);GO:0016301(kinase activity);GO:0016310(phosphorylation);GO:0016740(transferase activity)	04010(MAPK signaling pathway);04020(Calcium signaling pathway);04114(Oocyte meiosis);04140(Autophagy - animal);04261(Adrenergic signaling in cardiomyocytes);04270(Vascular smooth muscle contraction);04310(Wnt signaling pathway);04340(Hedgehog signaling pathway);04371(Apelin signaling pathway);04530(Tight junction);04540(Gap junction);04910(Insulin signaling pathway);04912(GnRH signaling pathway);…	K04345	EC:2.7.11.11
1	ENSDARG00000008255	cnot6a	1.17964	0.979605	0.268077	0.232	0.232	5.00602e-06	0.138727	CCR4-NOT transcription complex, subunit 6a [Source:ZFIN;Acc:ZDB-GENE-030131-2768]	GO:0005515(protein binding)	03018(RNA degradation)	K12603	EC:3.1.13.4
1	ENSDARG00000020504	h3f3a	4.08957	3.33769	0.2931	0.567	0.577	5.04311e-06	0.139755	H3 histone, family 3A [Source:ZFIN;Acc:ZDB-GENE-040426-1928]	GO:0000786(nucleosome);GO:0003677(DNA binding);GO:0005634(nucleus);GO:0005694(chromosome);GO:0031492(nucleosomal DNA binding);GO:0046982(protein heterodimerization activity)	NA	K11253	NA
1	ENSDARG00000006672	fam49a	1.26055	0.920378	0.453755	0.236	0.17	5.19482e-06	0.143959	family with sequence similarity 49 member A [Source:ZFIN;Acc:ZDB-GENE-031002-50]	GO:0003674(molecular_function);GO:0045580(regulation of T cell differentiation);GO:0048538(thymus development)	NA	NA	NA
1	ENSDARG00000018971	b3gnt5a	2.54634	2.02467	0.330734	0.183	0.24	5.40379e-06	0.14975	UDP-GlcNAc:betaGal beta-1,3-N-acetylglucosaminyltransferase 5a [Source:ZFIN;Acc:ZDB-GENE-030131-8470]	GO:0000139(Golgi membrane);GO:0005783(endoplasmic reticulum);GO:0005794(Golgi apparatus);GO:0006486(protein glycosylation);GO:0008376(acetylgalactosaminyltransferase activity);GO:0008378(galactosyltransferase activity);GO:0008532(N-acetyllactosaminide beta-1,3-N-acetylglucosaminyltransferase activity);GO:0016020(membrane);GO:0016021(integral component of membrane);GO:0016740(transferase activity)…	00601(Glycosphingolipid biosynthesis - lacto and neolacto series)	K03766	EC:2.4.1.206
1	ENSDARG00000040917	cbfb	0.694467	0.578687	0.263123	0.133	0.144	6.05486e-06	0.167792	core-binding factor subunit beta [Source:ZFIN;Acc:ZDB-GENE-980526-440]	GO:0003677(DNA binding);GO:0003712(transcription coregulator activity);GO:0003713(transcription coactivator activity);GO:0005634(nucleus);GO:0006357(regulation of transcription by RNA polymerase II);GO:0016513(core-binding factor complex);GO:0030018(Z disc);GO:0030097(hemopoiesis);GO:0043565(sequence-specific DNA binding);GO:0045214(sarcomere organization);GO:0046982(protein heterodimerization ac…	NA	NA	NA
1	ENSDARG00000061459	si:dkey-253i9.4	0.571817	0.477289	0.260689	0.106	0.098	6.14939e-06	0.170412	si:dkey-253i9.4 [Source:ZFIN;Acc:ZDB-GENE-090313-280]	GO:0005085(guanyl-nucleotide exchange factor activity);GO:0005096(GTPase activator activity);GO:0005515(protein binding);GO:0005622(intracellular);GO:0007165(signal transduction);GO:0007264(small GTPase mediated signal transduction);GO:0017034(Rap guanyl-nucleotide exchange factor activity);GO:0042127(regulation of cell population proliferation);GO:0043547(positive regulation of GTPase activity)	04010(MAPK signaling pathway);04530(Tight junction)	K08018	NA
1	ENSDARG00000001782	prkacba	0.819884	0.5968	0.458172	0.156	0.1	6.21643e-06	0.17227	protein kinase, cAMP-dependent, catalytic, beta a [Source:ZFIN;Acc:ZDB-GENE-040426-1351]	GO:0000166(nucleotide binding);GO:0004672(protein kinase activity);GO:0004674(protein serine/threonine kinase activity);GO:0005524(ATP binding);GO:0005575(cellular_component);GO:0006468(protein phosphorylation);GO:0016301(kinase activity);GO:0016310(phosphorylation);GO:0016740(transferase activity)	04010(MAPK signaling pathway);04020(Calcium signaling pathway);04114(Oocyte meiosis);04140(Autophagy - animal);04261(Adrenergic signaling in cardiomyocytes);04270(Vascular smooth muscle contraction);04310(Wnt signaling pathway);04340(Hedgehog signaling pathway);04371(Apelin signaling pathway);04530(Tight junction);04540(Gap junction);04910(Insulin signaling pathway);04912(GnRH signaling pathway);…	K04345	EC:2.7.11.11
1	ENSDARG00000101413	dusp7	0.840492	0.671689	0.323441	0.167	0.127	6.32464e-06	0.175268	dual specificity phosphatase 7 [Source:ZFIN;Acc:ZDB-GENE-030131-5457]	GO:0000188(inactivation of MAPK activity);GO:0004721(phosphoprotein phosphatase activity);GO:0004725(protein tyrosine phosphatase activity);GO:0005737(cytoplasm);GO:0005829(cytosol);GO:0006470(protein dephosphorylation);GO:0008138(protein tyrosine/serine/threonine phosphatase activity);GO:0016311(dephosphorylation);GO:0016787(hydrolase activity);GO:0016791(phosphatase activity);GO:0017017(MAP kin…	04010(MAPK signaling pathway)	K04459	3.1.3.48;EC:3.1.3.16
1	ENSDARG00000012450	vmp1	3.09873	1.67527	0.887287	0.171	0.143	6.53195e-06	0.181013	vacuole membrane protein 1 [Source:ZFIN;Acc:ZDB-GENE-030131-8733]	GO:0016020(membrane);GO:0016021(integral component of membrane)	04140(Autophagy - animal)	K21248	NA
1	ENSDARG00000003250	pik3cd	0.719884	0.558152	0.367106	0.133	0.109	6.60886e-06	0.183145	phosphatidylinositol-4,5-bisphosphate 3-kinase, catalytic subunit delta [Source:ZFIN;Acc:ZDB-GENE-040426-1128]	GO:0000166(nucleotide binding);GO:0005524(ATP binding);GO:0005737(cytoplasm);GO:0005886(plasma membrane);GO:0005942(phosphatidylinositol 3-kinase complex);GO:0006468(protein phosphorylation);GO:0014065(phosphatidylinositol 3-kinase signaling);GO:0016020(membrane);GO:0016301(kinase activity);GO:0016303(1-phosphatidylinositol-3-kinase activity);GO:0016310(phosphorylation);GO:0016477(cell migration)…	00562(Inositol phosphate metabolism);04012(ErbB signaling pathway);04068(FoxO signaling pathway);04070(Phosphatidylinositol signaling system);04140(Autophagy - animal);04150(mTOR signaling pathway);04210(Apoptosis);04218(Cellular senescence);04370(VEGF signaling pathway);04510(Focal adhesion);04620(Toll-like receptor signaling pathway);04625(C-type lectin receptor signaling pathway);04810(Regulat…	K00922	EC:2.7.1.153
1	ENSDARG00000037408	tbc1d10c	0.810658	0.667172	0.281034	0.144	0.13	7.19394e-06	0.199358	TBC1 domain family, member 10C [Source:ZFIN;Acc:ZDB-GENE-130125-1]	GO:0005096(GTPase activator activity);GO:0005623(cell);GO:0006886(intracellular protein transport);GO:0017137(Rab GTPase binding);GO:0090630(activation of GTPase activity)	NA	K19944	NA
1	ENSDARG00000061796	rasgrp4	0.734898	0.592989	0.309539	0.141	0.123	7.65138e-06	0.212035	RAS guanyl releasing protein 4 [Source:ZFIN;Acc:ZDB-GENE-050419-110]	GO:0001945(lymph vessel development);GO:0005085(guanyl-nucleotide exchange factor activity);GO:0005509(calcium ion binding);GO:0005622(intracellular);GO:0007264(small GTPase mediated signal transduction);GO:0035556(intracellular signal transduction);GO:0046872(metal ion binding)	04010(MAPK signaling pathway)	K04350	NA
1	ENSDARG00000020298	btg2	5.63913	3.80786	0.566494	0.536	0.505	8.15886e-06	0.226098	B-cell translocation gene 2 [Source:ZFIN;Acc:ZDB-GENE-000210-15]	GO:0005634(nucleus);GO:0005737(cytoplasm);GO:0008285(negative regulation of cell population proliferation);GO:0045930(negative regulation of mitotic cell cycle)	03018(RNA degradation)	K14443	NA
1	ENSDARG00000041022	pdcd4b	0.768952	0.567566	0.438105	0.144	0.079	8.17873e-06	0.226649	programmed cell death 4b [Source:ZFIN;Acc:ZDB-GENE-030131-9847]	GO:0003171(atrioventricular valve development);GO:0005634(nucleus);GO:0005829(cytosol);GO:0045892(negative regulation of transcription, DNA-templated)	NA	NA	NA
1	ENSDARG00000038754	plk3	5.56814	3.8386	0.536615	0.475	0.45	9.37156e-06	0.259705	polo-like kinase 3 (Drosophila) [Source:ZFIN;Acc:ZDB-GENE-030131-6134]	GO:0000166(nucleotide binding);GO:0000278(mitotic cell cycle);GO:0000922(spindle pole);GO:0004672(protein kinase activity);GO:0004674(protein serine/threonine kinase activity);GO:0005515(protein binding);GO:0005524(ATP binding);GO:0005634(nucleus);GO:0005737(cytoplasm);GO:0005813(centrosome);GO:0006468(protein phosphorylation);GO:0006974(cellular response to DNA damage stimulus);GO:0016301(kinase…	04068(FoxO signaling pathway);04625(C-type lectin receptor signaling pathway)	K08862	EC:2.7.11.21
1	ENSDARG00000061566	slc7a3b	1.78331	1.487	0.262153	0.297	0.305	9.63803e-06	0.267089	solute carrier family 7 (cationic amino acid transporter, y+ system), member 3b [Source:ZFIN;Acc:ZDB-GENE-120813-6]	GO:0000064(L-ornithine transmembrane transporter activity);GO:0006865(amino acid transport);GO:0015181(arginine transmembrane transporter activity);GO:0015189(L-lysine transmembrane transporter activity);GO:0016020(membrane);GO:0016021(integral component of membrane);GO:0022857(transmembrane transporter activity);GO:0055085(transmembrane transport);GO:0097638(L-arginine import across plasma membr…	NA	NA	NA
1	ENSDARG00000016255	chmp4ba	8.01996	6.62048	0.276659	0.711	0.692	1.03143e-05	0.285831	charged multivesicular body protein 4Ba [Source:ZFIN;Acc:ZDB-GENE-040426-906]	GO:0007034(vacuolar transport)	04144(Endocytosis);04217(Necroptosis)	K12194	NA
1	ENSDARG00000013360	sh3gl3a	2.57697	1.80857	0.510823	0.365	0.303	1.0678e-05	0.295908	SH3-domain GRB2-like 3a [Source:ZFIN;Acc:ZDB-GENE-070112-242]	GO:0005515(protein binding);GO:0005737(cytoplasm);GO:0006897(endocytosis)	04144(Endocytosis)	K11247	NA
1	ENSDARG00000027590	sept2	1.47551	1.21933	0.275126	0.285	0.287	1.08725e-05	0.301298	septin 2 [Source:ZFIN;Acc:ZDB-GENE-030131-911]	GO:0000166(nucleotide binding);GO:0003924(GTPase activity);GO:0005525(GTP binding);GO:0005940(septin ring);GO:0015630(microtubule cytoskeleton);GO:0031105(septin complex);GO:0032947(protein-containing complex scaffold activity);GO:0051301(cell division);GO:0060271(cilium assembly);GO:0061640(cytoskeleton-dependent cytokinesis)	NA	K16942	NA
1	ENSDARG00000036106	rgs18	0.819908	0.59255	0.468526	0.133	0.092	1.17109e-05	0.324534	regulator of G protein signaling 18 [Source:ZFIN;Acc:ZDB-GENE-061013-722]	GO:0002574(thrombocyte differentiation);GO:0005096(GTPase activator activity);GO:0007186(G protein-coupled receptor signaling pathway);GO:0009948(anterior/posterior axis specification);GO:0043547(positive regulation of GTPase activity);GO:0048840(otolith development);GO:0048884(neuromast development);GO:0071599(otic vesicle development)	NA	K16449	NA
1	ENSDARG00000008186	syk	4.0146	2.9826	0.428685	0.456	0.42	1.25146e-05	0.346804	spleen tyrosine kinase [Source:ZFIN;Acc:ZDB-GENE-040702-3]	GO:0000166(nucleotide binding);GO:0001946(lymphangiogenesis);GO:0004672(protein kinase activity);GO:0004713(protein tyrosine kinase activity);GO:0004715(non-membrane spanning protein tyrosine kinase activity);GO:0005524(ATP binding);GO:0005737(cytoplasm);GO:0006468(protein phosphorylation);GO:0016301(kinase activity);GO:0016310(phosphorylation);GO:0016740(transferase activity);GO:0018108(peptidyl…	04625(C-type lectin receptor signaling pathway);05168(Herpes simplex virus 1 infection)	K05855	EC:2.7.10.2
1	ENSDARG00000021113	ptmaa	15.7309	12.5439	0.326618	0.924	0.891	1.3332e-05	0.369455	prothymosin alpha a [Source:ZFIN;Acc:ZDB-GENE-030131-7647]	NA	NA	K13784	NA
1	ENSDARG00000010519	per3	2.16197	1.70617	0.341579	0.346	0.339	1.36002e-05	0.376888	period circadian clock 3 [Source:ZFIN;Acc:ZDB-GENE-000804-1]	GO:0000122(negative regulation of transcription by RNA polymerase II);GO:0000976(transcription regulatory region sequence-specific DNA binding);GO:0001222(transcription corepressor binding);GO:0005515(protein binding);GO:0005634(nucleus);GO:0005737(cytoplasm);GO:0008134(transcription factor binding);GO:0009416(response to light stimulus);GO:0009648(photoperiodism);GO:0032922(circadian regulation …	NA	K21945	NA
1	ENSDARG00000015657	zgc:77112	0.93646	0.694454	0.431337	0.129	0.115	1.60516e-05	0.444823	zgc:77112 [Source:ZFIN;Acc:ZDB-GENE-040426-2219]	GO:0000164(protein phosphatase type 1 complex);GO:0001878(response to yeast);GO:0005515(protein binding);GO:0005975(carbohydrate metabolic process);GO:0005977(glycogen metabolic process);GO:0005981(regulation of glycogen catabolic process);GO:0019888(protein phosphatase regulator activity);GO:0043666(regulation of phosphoprotein phosphatase activity)	04910(Insulin signaling pathway)	K07189	NA
1	ENSDARG00000008153	serinc5	0.910202	0.727591	0.323059	0.167	0.148	1.66605e-05	0.461697	serine incorporator 5 [Source:ZFIN;Acc:ZDB-GENE-040426-2918]	GO:0002376(immune system process);GO:0005886(plasma membrane);GO:0006629(lipid metabolic process);GO:0006658(phosphatidylserine metabolic process);GO:0006665(sphingolipid metabolic process);GO:0008654(phospholipid biosynthetic process);GO:0009597(detection of virus);GO:0016020(membrane);GO:0016021(integral component of membrane);GO:0042552(myelination);GO:0045087(innate immune response);GO:005160…	NA	NA	NA
1	ENSDARG00000019613	ip6k2b	1.94026	1.58553	0.291285	0.308	0.31	1.68199e-05	0.466112	inositol hexakisphosphate kinase 2b [Source:ZFIN;Acc:ZDB-GENE-040718-85]	GO:0005575(cellular_component);GO:0016301(kinase activity);GO:0016310(phosphorylation);GO:0016740(transferase activity);GO:0032958(inositol phosphate biosynthetic process)	04070(Phosphatidylinositol signaling system)	K07756	EC:2.7.4.21
1	ENSDARG00000075491	si:ch211-26b3.4	0.767134	0.534108	0.522349	0.122	0.062	1.72746e-05	0.478713	si:ch211-26b3.4 [Source:ZFIN;Acc:ZDB-GENE-081104-60]	GO:0005515(protein binding);GO:0005737(cytoplasm);GO:0009966(regulation of signal transduction);GO:0016020(membrane)	NA	K17536	NA
1	ENSDARG00000022712	stat3	0.671707	0.554547	0.276521	0.144	0.124	1.73614e-05	0.481118	signal transducer and activator of transcription 3 (acute-phase response factor) [Source:ZFIN;Acc:ZDB-GENE-980526-68]	GO:0001501(skeletal system development);GO:0001736(establishment of planar polarity);GO:0001837(epithelial to mesenchymal transition);GO:0003401(axis elongation);GO:0003677(DNA binding);GO:0003700(DNA-binding transcription factor activity);GO:0005634(nucleus);GO:0005737(cytoplasm);GO:0006355(regulation of transcription, DNA-templated);GO:0007165(signal transduction);GO:0007259(receptor signaling …	04068(FoxO signaling pathway);04217(Necroptosis);04920(Adipocytokine signaling pathway);04933(AGE-RAGE signaling pathway in diabetic complications)	K04692	NA
1	ENSDARG00000087647	sept7a	1.39458	1.15544	0.271389	0.259	0.261	1.81148e-05	0.501997	septin 7a [Source:ZFIN;Acc:ZDB-GENE-040426-1008]	GO:0000166(nucleotide binding);GO:0003924(GTPase activity);GO:0005525(GTP binding);GO:0005940(septin ring);GO:0015630(microtubule cytoskeleton);GO:0031105(septin complex);GO:0032947(protein-containing complex scaffold activity);GO:0060271(cilium assembly);GO:0061640(cytoskeleton-dependent cytokinesis)	NA	NA	NA
1	ENSDARG00000040705	glsb	1.61421	1.16178	0.474486	0.228	0.193	1.84878e-05	0.512334	glutaminase b [Source:ZFIN;Acc:ZDB-GENE-030616-550]	GO:0004359(glutaminase activity);GO:0005515(protein binding);GO:0006537(glutamate biosynthetic process);GO:0006541(glutamine metabolic process);GO:0006543(glutamine catabolic process)	00220(Arginine biosynthesis);00250(Alanine, aspartate and glutamate metabolism);00471(D-Glutamine and D-glutamate metabolism)	K01425	EC:3.5.1.2
1	ENSDARG00000095724	si:ch211-196c10.15	1.12715	0.899791	0.325019	0.217	0.187	2.17097e-05	0.60162	si:ch211-196c10.15 [Source:ZFIN;Acc:ZDB-GENE-141216-138]	NA	NA	NA	NA
1	ENSDARG00000053113	ly75	1.20913	0.953943	0.341994	0.24	0.191	2.35393e-05	0.652321	lymphocyte antigen 75 [Source:ZFIN;Acc:ZDB-GENE-050309-166]	GO:0004888(transmembrane signaling receptor activity);GO:0008150(biological_process);GO:0016020(membrane);GO:0016021(integral component of membrane)	NA	K06559	NA
1	ENSDARG00000095705	CDPF1	0.540702	0.435758	0.311308	0.125	0.087	2.4478e-05	0.678335	si:ch211-239e6.4 [Source:ZFIN;Acc:ZDB-GENE-041210-170]	GO:0003674(molecular_function);GO:0005575(cellular_component);GO:0008150(biological_process)	NA	NA	NA
1	ENSDARG00000075211	chd7	0.959236	0.795065	0.270814	0.19	0.172	2.62048e-05	0.726188	chromodomain helicase DNA binding protein 7 [Source:ZFIN;Acc:ZDB-GENE-070912-179]	GO:0001755(neural crest cell migration);GO:0001756(somitogenesis);GO:0001947(heart looping);GO:0002244(hematopoietic progenitor cell differentiation);GO:0005515(protein binding);GO:0005524(ATP binding);GO:0005634(nucleus);GO:0007368(determination of left/right symmetry);GO:0007507(heart development);GO:0009303(rRNA transcription);GO:0014029(neural crest formation);GO:0016817(hydrolase activity, a…	NA	K14437	EC:3.6.4.12
1	ENSDARG00000000068	slc9a3r1a	1.31001	1.05564	0.311466	0.247	0.22	2.62172e-05	0.726531	SLC9A3 regulator 1a [Source:ZFIN;Acc:ZDB-GENE-031006-7]	GO:0005515(protein binding);GO:0005886(plasma membrane);GO:0006612(protein targeting to membrane);GO:0012505(endomembrane system);GO:0016020(membrane);GO:0021591(ventricular system development);GO:0032947(protein-containing complex scaffold activity);GO:0043113(receptor clustering);GO:0055078(sodium ion homeostasis);GO:0071599(otic vesicle development)	04530(Tight junction)	K13365	NA
1	ENSDARG00000055075	svila	1.11375	0.832309	0.420238	0.179	0.148	2.64664e-05	0.733437	supervillin a [Source:ZFIN;Acc:ZDB-GENE-990706-5]	GO:0003779(actin binding);GO:0007010(cytoskeleton organization);GO:0051015(actin filament binding)	NA	K10369	NA
1	ENSDARG00000054155	pcna	1.39484	1.08445	0.363135	0.213	0.171	2.75314e-05	0.762951	proliferating cell nuclear antigen [Source:ZFIN;Acc:ZDB-GENE-000210-8]	GO:0003677(DNA binding);GO:0005634(nucleus);GO:0006260(DNA replication);GO:0006272(leading strand elongation);GO:0006275(regulation of DNA replication);GO:0006298(mismatch repair);GO:0009617(response to bacterium);GO:0014823(response to activity);GO:0019985(translesion synthesis);GO:0030337(DNA polymerase processivity factor activity);GO:0043626(PCNA complex);GO:0070557(PCNA-p21 complex)	03030(DNA replication);03410(Base excision repair);03420(Nucleotide excision repair);03430(Mismatch repair);04110(Cell cycle);04530(Tight junction)	K04802	NA
1	ENSDARG00000038882	smc4	0.690714	0.555813	0.31349	0.141	0.1	2.85942e-05	0.792403	structural maintenance of chromosomes 4 [Source:ZFIN;Acc:ZDB-GENE-020419-21]	GO:0005515(protein binding);GO:0005524(ATP binding);GO:0005634(nucleus);GO:0005694(chromosome);GO:0051276(chromosome organization)	NA	K06675	NA
1	ENSDARG00000042151	skia	0.915322	0.694186	0.398956	0.163	0.126	2.96298e-05	0.821101	v-ski avian sarcoma viral oncogene homolog a [Source:ZFIN;Acc:ZDB-GENE-990715-9]	GO:0001947(heart looping);GO:0005634(nucleus);GO:0006351(transcription, DNA-templated);GO:0009953(dorsal/ventral pattern formation);GO:0030512(negative regulation of transforming growth factor beta receptor signaling pathway);GO:0030514(negative regulation of BMP signaling pathway);GO:0045596(negative regulation of cell differentiation);GO:0046332(SMAD binding);GO:0048666(neuron development);GO:0…	NA	NA	NA
1	ENSDARG00000016527	helz2	0.947401	0.722017	0.391942	0.125	0.127	3.15156e-05	0.873361	helicase with zinc finger 2, transcriptional coactivator [Source:ZFIN;Acc:ZDB-GENE-120920-1]	GO:0003723(RNA binding);GO:0004540(ribonuclease activity);GO:0030374(nuclear receptor transcription coactivator activity);GO:0090501(RNA phosphodiester bond hydrolysis);GO:1903508(positive regulation of nucleic acid-templated transcription)	NA	NA	NA
1	ENSDARG00000104197	ptpn22	0.723148	0.598689	0.272484	0.141	0.131	3.2187e-05	0.891965	protein tyrosine phosphatase, non-receptor type 22 [Source:ZFIN;Acc:ZDB-GENE-060503-458]	GO:0004721(phosphoprotein phosphatase activity);GO:0004725(protein tyrosine phosphatase activity);GO:0006470(protein dephosphorylation);GO:0016311(dephosphorylation);GO:0016787(hydrolase activity);GO:0016791(phosphatase activity);GO:0035335(peptidyl-tyrosine dephosphorylation)	NA	K18024	EC:3.1.3.48
1	ENSDARG00000075164	mylk5	0.866934	0.612991	0.500056	0.137	0.081	3.30035e-05	0.914594	myosin, light chain kinase 5 [Source:ZFIN;Acc:ZDB-GENE-050309-74]	GO:0004672(protein kinase activity);GO:0004687(myosin light chain kinase activity);GO:0005515(protein binding);GO:0005524(ATP binding);GO:0005575(cellular_component);GO:0006468(protein phosphorylation);GO:0016301(kinase activity);GO:0016310(phosphorylation)	04020(Calcium signaling pathway);04270(Vascular smooth muscle contraction);04371(Apelin signaling pathway);04510(Focal adhesion);04810(Regulation of actin cytoskeleton)	K00907	EC:2.7.11.18
1	ENSDARG00000056481	vat1	1.17802	0.948074	0.313288	0.209	0.17	3.63987e-05	1	vesicle amine transport 1 [Source:ZFIN;Acc:ZDB-GENE-030616-178]	GO:0008270(zinc ion binding);GO:0016491(oxidoreductase activity);GO:0048037(cofactor binding);GO:0055114(oxidation-reduction process)	NA	K23167	NA
1	ENSDARG00000077907	si:dkey-183p4.10	0.878128	0.663455	0.404434	0.179	0.107	3.75716e-05	1	si:dkey-183p4.10 [Source:ZFIN;Acc:ZDB-GENE-081104-337]	GO:0016020(membrane);GO:0016021(integral component of membrane)	NA	NA	NA
1	ENSDARG00000102572	si:ch211-260e23.9	0.725499	0.523455	0.470908	0.137	0.071	3.789e-05	1	si:ch211-260e23.9 [Source:ZFIN;Acc:ZDB-GENE-141222-48]	GO:0000045(autophagosome assembly);GO:0005634(nucleus);GO:0005776(autophagosome);GO:0006355(regulation of transcription, DNA-templated);GO:0008285(negative regulation of cell population proliferation);GO:0010506(regulation of autophagy);GO:0045893(positive regulation of transcription, DNA-templated)	NA	NA	NA
1	ENSDARG00000041140	ddb2	0.983941	0.815668	0.27059	0.202	0.171	3.92043e-05	1	damage-specific DNA binding protein 2 [Source:ZFIN;Acc:ZDB-GENE-050419-169]	GO:0000209(protein polyubiquitination);GO:0003677(DNA binding);GO:0003684(damaged DNA binding);GO:0004842(ubiquitin-protein transferase activity);GO:0005515(protein binding);GO:0005634(nucleus);GO:0005654(nucleoplasm);GO:0006281(DNA repair);GO:0006290(pyrimidine dimer repair);GO:0006974(cellular response to DNA damage stimulus);GO:0009411(response to UV);GO:0010224(response to UV-B);GO:0016567(pr…	03420(Nucleotide excision repair);04115(p53 signaling pathway);04120(Ubiquitin mediated proteolysis)	K10140	NA
1	ENSDARG00000070426	chac1	8.80323	7.10253	0.309699	0.73	0.758	3.92317e-05	1	ChaC, cation transport regulator homolog 1 (E. coli) [Source:ZFIN;Acc:ZDB-GENE-030131-1957]	GO:0003839(gamma-glutamylcyclotransferase activity);GO:0005112(Notch binding);GO:0005737(cytoplasm);GO:0005794(Golgi apparatus);GO:0005802(trans-Golgi network);GO:0005829(cytosol);GO:0006751(glutathione catabolic process);GO:0006915(apoptotic process);GO:0006986(response to unfolded protein);GO:0007219(Notch signaling pathway);GO:0007399(nervous system development);GO:0010955(negative regulation …	00480(Glutathione metabolism)	K07232	EC:4.3.2.7
1	ENSDARG00000059461	mepce	1.06056	0.870361	0.28514	0.213	0.191	4.01694e-05	1	methylphosphate capping enzyme [Source:ZFIN;Acc:ZDB-GENE-030131-3936]	GO:0008168(methyltransferase activity);GO:0032259(methylation)	NA	K15190	EC:2.1.1.-
1	ENSDARG00000062190	PDE3B	0.75044	0.577563	0.37776	0.137	0.099	4.17518e-05	1	si:ch211-79e4.4 [Source:ZFIN;Acc:ZDB-GENE-160728-20]	GO:0004114(3',5'-cyclic-nucleotide phosphodiesterase activity);GO:0004115(3',5'-cyclic-AMP phosphodiesterase activity);GO:0007165(signal transduction);GO:0008081(phosphoric diester hydrolase activity);GO:0016020(membrane);GO:0016021(integral component of membrane);GO:0016787(hydrolase activity);GO:0043422(protein kinase B binding);GO:0043951(negative regulation of cAMP-mediated signaling);GO:0046…	00230(Purine metabolism);04371(Apelin signaling pathway);04910(Insulin signaling pathway);04914(Progesterone-mediated oocyte maturation)	K13296	EC:3.1.4.17
1	ENSDARG00000010619	themis	0.785241	0.615173	0.352144	0.133	0.106	4.30566e-05	1	thymocyte selection associated [Source:ZFIN;Acc:ZDB-GENE-041008-160]	GO:0002250(adaptive immune response);GO:0002376(immune system process);GO:0003674(molecular_function);GO:0005634(nucleus);GO:0005737(cytoplasm);GO:0007275(multicellular organism development);GO:0043368(positive T cell selection);GO:0043383(negative T cell selection);GO:0050852(T cell receptor signaling pathway)	NA	NA	NA
1	ENSDARG00000100826	hif1al	0.889987	0.695878	0.35495	0.179	0.141	4.74891e-05	1	hypoxia inducible factor 1 subunit alpha, like [Source:ZFIN;Acc:ZDB-GENE-040426-1315]	GO:0000976(transcription regulatory region sequence-specific DNA binding);GO:0000981(DNA-binding transcription factor activity, RNA polymerase II-specific);GO:0001654(eye development);GO:0001666(response to hypoxia);GO:0003700(DNA-binding transcription factor activity);GO:0005634(nucleus);GO:0005667(transcription factor complex);GO:0005737(cytoplasm);GO:0006355(regulation of transcription, DNA-te…	NA	NA	NA
1	ENSDARG00000029671	xpr1b	0.610144	0.50371	0.276555	0.144	0.114	4.74953e-05	1	xenotropic and polytropic retrovirus receptor 1b [Source:ZFIN;Acc:ZDB-GENE-060503-266]	GO:0000822(inositol hexakisphosphate binding);GO:0001501(skeletal system development);GO:0005794(Golgi apparatus);GO:0005886(plasma membrane);GO:0014004(microglia differentiation);GO:0015114(phosphate ion transmembrane transporter activity);GO:0015562(efflux transmembrane transporter activity);GO:0016020(membrane);GO:0016021(integral component of membrane);GO:0030225(macrophage differentiation);G…	NA	NA	NA
1	ENSDARG00000079366	ppp1r9ba	0.894791	0.745302	0.263726	0.186	0.177	5.53872e-05	1	protein phosphatase 1, regulatory subunit 9Ba [Source:ZFIN;Acc:ZDB-GENE-091006-1]	GO:0003779(actin binding);GO:0005515(protein binding);GO:0005737(cytoplasm);GO:0007015(actin filament organization);GO:0008157(protein phosphatase 1 binding);GO:0014069(postsynaptic density);GO:0015629(actin cytoskeleton);GO:0019722(calcium-mediated signaling);GO:0030425(dendrite);GO:0031175(neuron projection development);GO:0042127(regulation of cell population proliferation);GO:0050804(modulati…	NA	K17551	NA
1	ENSDARG00000045305	pde7a	2.32966	1.91011	0.286463	0.354	0.365	5.60562e-05	1	phosphodiesterase 7A [Source:ZFIN;Acc:ZDB-GENE-031222-10]	GO:0004114(3',5'-cyclic-nucleotide phosphodiesterase activity);GO:0004115(3',5'-cyclic-AMP phosphodiesterase activity);GO:0007165(signal transduction);GO:0008081(phosphoric diester hydrolase activity);GO:0016787(hydrolase activity);GO:0046872(metal ion binding)	00230(Purine metabolism)	K18436	EC:3.1.4.53
1	ENSDARG00000034503	per2	1.75903	1.38696	0.342855	0.308	0.282	5.98389e-05	1	period circadian clock 2 [Source:ZFIN;Acc:ZDB-GENE-011220-2]	GO:0000122(negative regulation of transcription by RNA polymerase II);GO:0000976(transcription regulatory region sequence-specific DNA binding);GO:0001222(transcription corepressor binding);GO:0003682(chromatin binding);GO:0005515(protein binding);GO:0005634(nucleus);GO:0005737(cytoplasm);GO:0008134(transcription factor binding);GO:0009409(response to cold);GO:0009411(response to UV);GO:0009416(r…	NA	K02633	NA
1	ENSDARG00000004537	kmt2a	0.904168	0.715705	0.337226	0.186	0.149	6.14295e-05	1	lysine (K)-specific methyltransferase 2A [Source:ZFIN;Acc:ZDB-GENE-080521-3]	GO:0003677(DNA binding);GO:0005515(protein binding);GO:0005634(nucleus);GO:0006325(chromatin organization);GO:0006355(regulation of transcription, DNA-templated);GO:0008168(methyltransferase activity);GO:0008270(zinc ion binding);GO:0016740(transferase activity);GO:0018024(histone-lysine N-methyltransferase activity);GO:0021782(glial cell development);GO:0022008(neurogenesis);GO:0030097(hemopoies…	00310(Lysine degradation)	K09186	EC:2.1.1.43
1	ENSDARG00000036135	bbox1	0.503235	0.399862	0.331729	0.106	0.045	6.69703e-05	1	butyrobetaine (gamma), 2-oxoglutarate dioxygenase (gamma-butyrobetaine hydroxylase) 1 [Source:ZFIN;Acc:ZDB-GENE-050417-218]	GO:0005506(iron ion binding);GO:0005739(mitochondrion);GO:0008336(gamma-butyrobetaine dioxygenase activity);GO:0016491(oxidoreductase activity);GO:0016702(oxidoreductase activity, acting on single donors with incorporation of molecular oxygen, incorporation of two atoms of oxygen);GO:0045329(carnitine biosynthetic process);GO:0055114(oxidation-reduction process)	00310(Lysine degradation)	K00471	EC:1.14.11.1
1	ENSDARG00000097519	AL935300.2	0.626174	0.474452	0.400301	0.118	0.052	6.73161e-05	1	NA	NA	NA	NA	NA
1	ENSDARG00000105368	CR383676.2	0.664681	0.530633	0.324946	0.137	0.102	6.88357e-05	1	NA	NA	NA	NA	NA
1	ENSDARG00000009782	myh11a	2.68502	2.1487	0.321474	0.373	0.36	7.25731e-05	1	myosin, heavy chain 11a, smooth muscle [Source:ZFIN;Acc:ZDB-GENE-050531-1]	GO:0000166(nucleotide binding);GO:0003774(motor activity);GO:0003779(actin binding);GO:0005515(protein binding);GO:0005524(ATP binding);GO:0008015(blood circulation);GO:0016459(myosin complex);GO:0030860(regulation of polarized epithelial cell differentiation);GO:0048546(digestive tract morphogenesis);GO:0048565(digestive tract development);GO:0051015(actin filament binding);GO:0060047(heart cont…	04530(Tight junction)	K10352	NA
1	ENSDARG00000057913	syt11a	0.912993	0.706012	0.370911	0.163	0.12	7.65568e-05	1	synaptotagmin XIa [Source:ZFIN;Acc:ZDB-GENE-040426-2815]	GO:0000149(SNARE binding);GO:0001786(phosphatidylserine binding);GO:0005886(plasma membrane);GO:0014059(regulation of dopamine secretion);GO:0016020(membrane);GO:0016021(integral component of membrane);GO:0016192(vesicle-mediated transport);GO:0017156(calcium ion regulated exocytosis);GO:0017158(regulation of calcium ion-dependent exocytosis);GO:0030276(clathrin binding);GO:0030424(axon);GO:00430…	NA	K19911	NA
1	ENSDARG00000037554	arhgef3l	0.834082	0.687523	0.27878	0.163	0.148	8.24221e-05	1	Rho guanine nucleotide exchange factor (GEF) 3, like [Source:ZFIN;Acc:ZDB-GENE-050522-85]	GO:0005085(guanyl-nucleotide exchange factor activity);GO:0005089(Rho guanyl-nucleotide exchange factor activity);GO:0035023(regulation of Rho protein signal transduction);GO:0035556(intracellular signal transduction)	NA	NA	NA
1	ENSDARG00000024746	hsp90aa1.2	4.71897	2.56796	0.877852	0.198	0.156	8.53619e-05	1	heat shock protein 90, alpha (cytosolic), class A member 1, tandem duplicate 2 [Source:ZFIN;Acc:ZDB-GENE-031001-3]	GO:0005515(protein binding);GO:0005524(ATP binding);GO:0005634(nucleus);GO:0005737(cytoplasm);GO:0005829(cytosol);GO:0005886(plasma membrane);GO:0006457(protein folding);GO:0009408(response to heat);GO:0009409(response to cold);GO:0009986(cell surface);GO:0032991(protein-containing complex);GO:0034605(cellular response to heat);GO:0042803(protein homodimerization activity);GO:0043025(neuronal cel…	04141(Protein processing in endoplasmic reticulum);04217(Necroptosis);04621(NOD-like receptor signaling pathway);04914(Progesterone-mediated oocyte maturation)	K04079	NA
1	ENSDARG00000042722	blnk	1.39842	0.94395	0.567011	0.148	0.089	8.73039e-05	1	B cell linker [Source:ZFIN;Acc:ZDB-GENE-040702-4]	GO:0007169(transmembrane receptor protein tyrosine kinase signaling pathway);GO:0035556(intracellular signal transduction)	NA	NA	NA
1	ENSDARG00000095693	CT573231.1	2.07405	1.48881	0.478292	0.167	0.162	9.65832e-05	1	NA	NA	NA	NA	NA
1	ENSDARG00000040445	si:ch211-219a4.3	1.50048	1.22336	0.294575	0.247	0.237	9.95371e-05	1	si:ch211-219a4.3 [Source:ZFIN;Acc:ZDB-GENE-070424-157]	GO:0003676(nucleic acid binding);GO:0003723(RNA binding);GO:0003950(NAD+ ADP-ribosyltransferase activity);GO:0016740(transferase activity);GO:0016757(transferase activity, transferring glycosyl groups)	NA	K15261	EC:2.4.2.30
1	ENSDARG00000097533	BX571880.1	0.777123	0.56722	0.454235	0.133	0.076	0.000135367	1	NA	NA	NA	NA	NA
1	ENSDARG00000030479	hmgb1b	0.891477	0.727916	0.292425	0.171	0.153	0.000155115	1	high mobility group box 1b [Source:ZFIN;Acc:ZDB-GENE-030131-8480]	GO:0000790(nuclear chromatin);GO:0002218(activation of innate immune response);GO:0003677(DNA binding);GO:0005634(nucleus);GO:0005737(cytoplasm);GO:0006310(DNA recombination);GO:0006338(chromatin remodeling);GO:0006357(regulation of transcription by RNA polymerase II);GO:0008134(transcription factor binding);GO:0008301(DNA binding, bending);GO:0010469(regulation of signaling receptor activity);GO…	03410(Base excision repair);04140(Autophagy - animal);04217(Necroptosis)	K10802	NA
1	ENSDARG00000044755	si:dkeyp-87d8.8	0.740875	0.594041	0.318666	0.137	0.114	0.000166327	1	si:dkeyp-87d8.8 [Source:ZFIN;Acc:ZDB-GENE-041111-161]	GO:0008150(biological_process);GO:0008375(acetylglucosaminyltransferase activity);GO:0016020(membrane);GO:0016021(integral component of membrane)	NA	NA	NA
1	ENSDARG00000012247	def6a	0.504541	0.412579	0.290299	0.103	0.077	0.000169809	1	differentially expressed in FDCP 6a homolog (mouse) [Source:ZFIN;Acc:ZDB-GENE-040426-1246]	GO:0005575(cellular_component);GO:0005634(nucleus);GO:0005737(cytoplasm);GO:0042074(cell migration involved in gastrulation);GO:0060026(convergent extension);GO:0060027(convergent extension involved in gastrulation)	NA	NA	NA
1	ENSDARG00000052388	pcgf5b	0.670549	0.553956	0.275572	0.125	0.112	0.000175425	1	polycomb group ring finger 5b [Source:ZFIN;Acc:ZDB-GENE-060512-34]	GO:0000977(RNA polymerase II regulatory region sequence-specific DNA binding);GO:0003700(DNA-binding transcription factor activity);GO:0005634(nucleus);GO:0031519(PcG protein complex);GO:0035102(PRC1 complex);GO:0036353(histone H2A-K119 monoubiquitination);GO:0045944(positive regulation of transcription by RNA polymerase II);GO:0046872(metal ion binding);GO:0060819(inactivation of X chromosome by…	NA	K11489	NA
1	ENSDARG00000060498	tnfrsf9a	31.2373	25.2372	0.307714	0.719	0.644	0.000199006	1	tumor necrosis factor receptor superfamily, member 9a [Source:ZFIN;Acc:ZDB-GENE-060421-8213]	GO:0005515(protein binding);GO:0016020(membrane);GO:0016021(integral component of membrane)	04060(Cytokine-cytokine receptor interaction)	K05146	NA
1	ENSDARG00000061544	ano6	0.596968	0.484748	0.300418	0.118	0.09	0.000200981	1	anoctamin 6 [Source:ZFIN;Acc:ZDB-GENE-081104-64]	GO:0002040(sprouting angiogenesis);GO:0002407(dendritic cell chemotaxis);GO:0007596(blood coagulation);GO:0016020(membrane);GO:0016021(integral component of membrane);GO:0030501(positive regulation of bone mineralization);GO:0034767(positive regulation of ion transmembrane transport);GO:0046983(protein dimerization activity);GO:0061588(calcium activated phospholipid scrambling);GO:1902476(chlorid…	NA	K19500	NA
1	ENSDARG00000071261	zmp:0000001139	0.883898	0.726197	0.283519	0.171	0.153	0.000263119	1	zmp:0000001139 [Source:ZFIN;Acc:ZDB-GENE-140106-99]	GO:0016020(membrane);GO:0016021(integral component of membrane)	NA	NA	NA
1	ENSDARG00000051748	ccnd2a	1.03105	0.814623	0.339917	0.179	0.15	0.000285279	1	cyclin D2, a [Source:ZFIN;Acc:ZDB-GENE-070424-30]	GO:0000079(regulation of cyclin-dependent protein serine/threonine kinase activity);GO:0000278(mitotic cell cycle);GO:0000307(cyclin-dependent protein kinase holoenzyme complex);GO:0004672(protein kinase activity);GO:0005634(nucleus);GO:0005737(cytoplasm);GO:0006468(protein phosphorylation);GO:0007088(regulation of mitotic nuclear division);GO:0008284(positive regulation of cell population prolif…	04068(FoxO signaling pathway);04110(Cell cycle);04115(p53 signaling pathway);04218(Cellular senescence);04310(Wnt signaling pathway);04340(Hedgehog signaling pathway);04510(Focal adhesion)	K10151	NA
1	ENSDARG00000005861	ralgapa2	0.475144	0.385487	0.301681	0.11	0.068	0.000289141	1	Ral GTPase activating protein, alpha subunit 2 (catalytic) [Source:ZFIN;Acc:ZDB-GENE-131122-56]	GO:0005096(GTPase activator activity);GO:0005634(nucleus);GO:0005737(cytoplasm);GO:0043547(positive regulation of GTPase activity);GO:0051056(regulation of small GTPase mediated signal transduction)	NA	NA	NA
1	ENSDARG00000059035	porb	0.556252	0.462788	0.265387	0.106	0.093	0.000294194	1	P450 (cytochrome) oxidoreductase b [Source:ZFIN;Acc:ZDB-GENE-030131-5767]	GO:0003958(NADPH-hemoprotein reductase activity);GO:0005737(cytoplasm);GO:0005783(endoplasmic reticulum);GO:0005789(endoplasmic reticulum membrane);GO:0005829(cytosol);GO:0009725(response to hormone);GO:0010181(FMN binding);GO:0016020(membrane);GO:0016021(integral component of membrane);GO:0016491(oxidoreductase activity);GO:0050660(flavin adenine dinucleotide binding);GO:0050661(NADP binding);GO…	NA	K00327	EC:1.6.2.4
1	ENSDARG00000098903	tfe3a	0.55703	0.450794	0.305288	0.114	0.086	0.000296263	1	transcription factor binding to IGHM enhancer 3a [Source:ZFIN;Acc:ZDB-GENE-010919-2]	GO:0000981(DNA-binding transcription factor activity, RNA polymerase II-specific);GO:0005654(nucleoplasm);GO:0006351(transcription, DNA-templated);GO:0006355(regulation of transcription, DNA-templated);GO:0006357(regulation of transcription by RNA polymerase II);GO:0006959(humoral immune response);GO:0045670(regulation of osteoclast differentiation);GO:0045893(positive regulation of transcription…	04137(Mitophagy - animal)	K09105	NA
1	ENSDARG00000059363	tgfbr2a	0.661417	0.531515	0.315451	0.137	0.091	0.000322021	1	transforming growth factor beta receptor 2a [Source:ZFIN;Acc:ZDB-GENE-120404-1]	GO:0000166(nucleotide binding);GO:0004672(protein kinase activity);GO:0004674(protein serine/threonine kinase activity);GO:0004675(transmembrane receptor protein serine/threonine kinase activity);GO:0005024(transforming growth factor beta-activated receptor activity);GO:0005026(transforming growth factor beta receptor activity, type II);GO:0005524(ATP binding);GO:0005887(integral component of pla…	NA	NA	NA
1	ENSDARG00000098312	scarb2a	2.26459	1.79051	0.338876	0.342	0.323	0.000338461	1	scavenger receptor class B, member 2a [Source:ZFIN;Acc:ZDB-GENE-020419-29]	GO:0005044(scavenger receptor activity);GO:0005764(lysosome);GO:0006898(receptor-mediated endocytosis);GO:0016020(membrane);GO:0016021(integral component of membrane);GO:0030903(notochord development)	04142(Lysosome)	K12384	NA
1	ENSDARG00000100515	dusp1	4.68993	3.27972	0.515991	0.437	0.409	0.00033951	1	dual specificity phosphatase 1 [Source:ZFIN;Acc:ZDB-GENE-040426-2018]	GO:0000188(inactivation of MAPK activity);GO:0004721(phosphoprotein phosphatase activity);GO:0004725(protein tyrosine phosphatase activity);GO:0005634(nucleus);GO:0005737(cytoplasm);GO:0006470(protein dephosphorylation);GO:0008138(protein tyrosine/serine/threonine phosphatase activity);GO:0016311(dephosphorylation);GO:0016787(hydrolase activity);GO:0016791(phosphatase activity);GO:0017017(MAP kin…	04010(MAPK signaling pathway)	K21278	3.1.3.48;EC:3.1.3.16
1	ENSDARG00000069619	atf7ip	1.30093	1.07596	0.273926	0.236	0.225	0.000342111	1	activating transcription factor 7 interacting protein [Source:ZFIN;Acc:ZDB-GENE-061103-178]	GO:0003674(molecular_function);GO:0005515(protein binding);GO:0005634(nucleus);GO:0031647(regulation of protein stability);GO:0050821(protein stabilization);GO:0090309(positive regulation of methylation-dependent chromatin silencing)	NA	NA	NA
1	ENSDARG00000028517	hbp1	0.593682	0.480525	0.305079	0.122	0.091	0.000352095	1	HMG-box transcription factor 1 [Source:ZFIN;Acc:ZDB-GENE-050522-414]	GO:0003677(DNA binding);GO:0003723(RNA binding);GO:0005515(protein binding);GO:0005634(nucleus);GO:0006355(regulation of transcription, DNA-templated)	NA	K21644	NA
1	ENSDARG00000036107	txnipa	3.1104	2.45758	0.339863	0.35	0.328	0.000401685	1	thioredoxin interacting protein a [Source:ZFIN;Acc:ZDB-GENE-030804-10]	NA	04621(NOD-like receptor signaling pathway)	K20910	NA
1	ENSDARG00000054588	cox6a2	0.824463	0.684362	0.268695	0.125	0.134	0.000442445	1	cytochrome c oxidase subunit 6A2 [Source:ZFIN;Acc:ZDB-GENE-040912-129]	GO:0004129(cytochrome-c oxidase activity);GO:0005739(mitochondrion);GO:0005743(mitochondrial inner membrane);GO:0005751(mitochondrial respiratory chain complex IV);GO:0006123(mitochondrial electron transport, cytochrome c to oxygen);GO:0009060(aerobic respiration);GO:0016020(membrane);GO:0030234(enzyme regulator activity);GO:0050790(regulation of catalytic activity);GO:1902600(proton transmembran…	00190(Oxidative phosphorylation);04260(Cardiac muscle contraction)	K02266	NA
1	ENSDARG00000075963	mhc1uba	17.1301	11.9698	0.517135	0.624	0.582	0.00047479	1	major histocompatibility complex class I UBA [Source:ZFIN;Acc:ZDB-GENE-990415-145]	GO:0005615(extracellular space);GO:0005886(plasma membrane);GO:0006955(immune response);GO:0009897(external side of plasma membrane);GO:0016020(membrane);GO:0016021(integral component of membrane)	NA	NA	NA
1	ENSDARG00000105615	si:ch211-196f2.6	2.42728	1.88668	0.363491	0.293	0.228	0.000512167	1	si:ch211-196f2.6 [Source:ZFIN;Acc:ZDB-GENE-160728-85]	GO:0016020(membrane);GO:0016021(integral component of membrane)	NA	NA	NA
1	ENSDARG00000017525	ccnt1	0.909002	0.755507	0.266838	0.194	0.165	0.000540002	1	cyclin T1 [Source:ZFIN;Acc:ZDB-GENE-030131-6397]	GO:0000079(regulation of cyclin-dependent protein serine/threonine kinase activity);GO:0005634(nucleus);GO:0006351(transcription, DNA-templated);GO:0006357(regulation of transcription by RNA polymerase II);GO:0008024(cyclin/CDK positive transcription elongation factor complex);GO:0016538(cyclin-dependent protein serine/threonine kinase regulator activity);GO:0032786(positive regulation of DNA-tem…	NA	K15188	NA
1	ENSDARG00000099026	si:dkey-185m8.2	1.66896	1.328	0.329694	0.24	0.223	0.000540395	1	si:dkey-185m8.2 [Source:ZFIN;Acc:ZDB-GENE-160114-60]	GO:0005525(GTP binding)	NA	NA	NA
1	ENSDARG00000075560	kmt2cb	0.745204	0.621414	0.262081	0.148	0.125	0.000707675	1	lysine (K)-specific methyltransferase 2Cb [Source:ZFIN;Acc:ZDB-GENE-070705-340]	GO:0003713(transcription coactivator activity);GO:0005515(protein binding);GO:0005634(nucleus);GO:0006355(regulation of transcription, DNA-templated);GO:0008168(methyltransferase activity);GO:0016740(transferase activity);GO:0018024(histone-lysine N-methyltransferase activity);GO:0032259(methylation);GO:0034968(histone lysine methylation);GO:0042393(histone binding);GO:0042800(histone methyltrans…	NA	NA	NA
1	ENSDARG00000097553	BX908750.1	0.847643	0.650443	0.382034	0.152	0.105	0.000748611	1	uncharacterized LOC110437990 [Source:NCBI gene;Acc:110437990]	NA	NA	NA	NA
1	ENSDARG00000100825	calm3a.1	0.690618	0.568684	0.280262	0.148	0.133	0.000761111	1	calmodulin 3a (phosphorylase kinase, delta) [Source:ZFIN;Acc:ZDB-GENE-030131-5590]	GO:0005509(calcium ion binding);GO:0019722(calcium-mediated signaling);GO:0046872(metal ion binding)	04020(Calcium signaling pathway);04070(Phosphatidylinositol signaling system);04114(Oocyte meiosis);04218(Cellular senescence);04261(Adrenergic signaling in cardiomyocytes);04270(Vascular smooth muscle contraction);04371(Apelin signaling pathway);04625(C-type lectin receptor signaling pathway);04744(Phototransduction);04910(Insulin signaling pathway);04912(GnRH signaling pathway);04916(Melanogene…	K02183	NA
1	ENSDARG00000055493	hic1	0.650746	0.499956	0.380295	0.11	0.07	0.000975349	1	hypermethylated in cancer 1 [Source:ZFIN;Acc:ZDB-GENE-040713-2]	GO:0000122(negative regulation of transcription by RNA polymerase II);GO:0003676(nucleic acid binding);GO:0003677(DNA binding);GO:0003700(DNA-binding transcription factor activity);GO:0005515(protein binding);GO:0005634(nucleus);GO:0006974(cellular response to DNA damage stimulus);GO:0008630(intrinsic apoptotic signaling pathway in response to DNA damage)	NA	NA	NA
1	ENSDARG00000053702	il2rgb	0.975775	0.8065	0.274873	0.175	0.158	0.00100505	1	interleukin 2 receptor, gamma b [Source:ZFIN;Acc:ZDB-GENE-080402-2]	GO:0004896(cytokine receptor activity);GO:0005515(protein binding);GO:0009897(external side of plasma membrane);GO:0016020(membrane);GO:0016021(integral component of membrane);GO:0019221(cytokine-mediated signaling pathway);GO:0019955(cytokine binding);GO:0019976(interleukin-2 binding);GO:0043235(receptor complex)	04060(Cytokine-cytokine receptor interaction);04144(Endocytosis)	K05070	NA
1	ENSDARG00000091233	FP236356.1	2.35254	1.79443	0.390691	0.338	0.269	0.00108285	1	NA	NA	NA	NA	NA
1	ENSDARG00000015566	dnmt3ab	0.690442	0.553996	0.317644	0.137	0.098	0.00109869	1	DNA (cytosine-5-)-methyltransferase 3 alpha b [Source:ZFIN;Acc:ZDB-GENE-050314-3]	GO:0006306(DNA methylation);GO:0008168(methyltransferase activity);GO:0009008(DNA-methyltransferase activity);GO:0010468(regulation of gene expression);GO:0016740(transferase activity);GO:0032259(methylation)	00270(Cysteine and methionine metabolism)	K17398	EC:2.1.1.37
1	ENSDARG00000036096	smad3a	0.771033	0.640376	0.267872	0.152	0.125	0.00150481	1	SMAD family member 3a [Source:ZFIN;Acc:ZDB-GENE-000509-3]	GO:0003677(DNA binding);GO:0003700(DNA-binding transcription factor activity);GO:0005515(protein binding);GO:0005622(intracellular);GO:0005634(nucleus);GO:0005667(transcription factor complex);GO:0005737(cytoplasm);GO:0006355(regulation of transcription, DNA-templated);GO:0007179(transforming growth factor beta receptor signaling pathway);GO:0007498(mesoderm development);GO:0043565(sequence-speci…	04068(FoxO signaling pathway);04110(Cell cycle);04144(Endocytosis);04218(Cellular senescence);04350(TGF-beta signaling pathway);04371(Apelin signaling pathway);04520(Adherens junction);04933(AGE-RAGE signaling pathway in diabetic complications)	K04500	NA
1	ENSDARG00000070132	aste1a	0.816345	0.664319	0.297301	0.122	0.113	0.001961	1	asteroid homolog 1a [Source:ZFIN;Acc:ZDB-GENE-060503-520]	NA	NA	NA	NA
1	ENSDARG00000086369	si:ch211-167j9.5	0.616969	0.48145	0.357811	0.11	0.067	0.00273169	1	si:ch211-167j9.5 [Source:ZFIN;Acc:ZDB-GENE-131121-210]	GO:0001525(angiogenesis);GO:0004672(protein kinase activity);GO:0004715(non-membrane spanning protein tyrosine kinase activity);GO:0005524(ATP binding);GO:0005925(focal adhesion);GO:0006468(protein phosphorylation);GO:0007173(epidermal growth factor receptor signaling pathway);GO:0030154(cell differentiation);GO:0030155(regulation of cell adhesion);GO:0038083(peptidyl-tyrosine autophosphorylation…	NA	NA	NA
1	ENSDARG00000103551	rnf213b	0.977278	0.778787	0.327541	0.156	0.14	0.00304228	1	ring finger protein 213b [Source:ZFIN;Acc:ZDB-GENE-110822-1]	GO:0004842(ubiquitin-protein transferase activity);GO:0016567(protein ubiquitination);GO:0016887(ATPase activity)	NA	K22754	EC:2.3.2.27
1	ENSDARG00000007241	mycb	2.46668	1.86207	0.40566	0.316	0.277	0.00365788	1	MYC proto-oncogene, bHLH transcription factor b [Source:ZFIN;Acc:ZDB-GENE-040426-780]	GO:0000981(DNA-binding transcription factor activity, RNA polymerase II-specific);GO:0002244(hematopoietic progenitor cell differentiation);GO:0003677(DNA binding);GO:0003700(DNA-binding transcription factor activity);GO:0005634(nucleus);GO:0006355(regulation of transcription, DNA-templated);GO:0006357(regulation of transcription by RNA polymerase II);GO:0046983(protein dimerization activity);GO:…	04010(MAPK signaling pathway);04012(ErbB signaling pathway);04110(Cell cycle);04218(Cellular senescence);04310(Wnt signaling pathway);04350(TGF-beta signaling pathway)	K04377	NA
1	ENSDARG00000102555	si:dkey-33i11.9	2.42938	1.73521	0.48548	0.24	0.197	0.00422049	1	si:dkey-33i11.9 [Source:ZFIN;Acc:ZDB-GENE-060503-262]	GO:0016020(membrane);GO:0016021(integral component of membrane)	NA	NA	NA
1	ENSDARG00000105034	zdhhc18b	0.696259	0.552037	0.334861	0.11	0.071	0.00704758	1	zinc finger, DHHC-type containing 18b [Source:ZFIN;Acc:ZDB-GENE-030131-6315]	GO:0005783(endoplasmic reticulum);GO:0005794(Golgi apparatus);GO:0006612(protein targeting to membrane);GO:0016020(membrane);GO:0016021(integral component of membrane);GO:0016740(transferase activity);GO:0016746(transferase activity, transferring acyl groups);GO:0018230(peptidyl-L-cysteine S-palmitoylation);GO:0019706(protein-cysteine S-palmitoyltransferase activity)	NA	NA	NA
1	ENSDARG00000016789	zgc:152891	0.591528	0.468412	0.336668	0.114	0.064	0.00860686	1	zgc:152891 [Source:ZFIN;Acc:ZDB-GENE-061013-229]	GO:0005506(iron ion binding);GO:0005515(protein binding);GO:0005575(cellular_component);GO:0016491(oxidoreductase activity);GO:0016702(oxidoreductase activity, acting on single donors with incorporation of molecular oxygen, incorporation of two atoms of oxygen);GO:0046872(metal ion binding);GO:0051213(dioxygenase activity);GO:0055114(oxidation-reduction process)	NA	NA	NA
2	ENSDARG00000094002	ccl34b.4	115.553	16.6197	2.79758	1	0.415	9.32695e-147	2.58469e-142	chemokine (C-C motif) ligand 34b, duplicate 4 [Source:ZFIN;Acc:ZDB-GENE-091204-344]	GO:0002548(monocyte chemotaxis);GO:0005576(extracellular region);GO:0005615(extracellular space);GO:0006954(inflammatory response);GO:0006955(immune response);GO:0007186(G protein-coupled receptor signaling pathway);GO:0008009(chemokine activity);GO:0030593(neutrophil chemotaxis);GO:0043547(positive regulation of GTPase activity);GO:0048020(CCR chemokine receptor binding);GO:0048247(lymphocyte ch…	NA	NA	NA
2	ENSDARG00000071499	cxcl32b.1	11.2003	1.76574	2.66519	0.723	0.137	4.99842e-102	1.38516e-97	chemokine (C-X-C motif) ligand 32b, duplicate 1 [Source:ZFIN;Acc:ZDB-GENE-140715-4]	GO:0002548(monocyte chemotaxis);GO:0005576(extracellular region);GO:0005615(extracellular space);GO:0006954(inflammatory response);GO:0006955(immune response);GO:0007186(G protein-coupled receptor signaling pathway);GO:0008009(chemokine activity);GO:0030593(neutrophil chemotaxis);GO:0043547(positive regulation of GTPase activity);GO:0048020(CCR chemokine receptor binding);GO:0048247(lymphocyte ch…	NA	NA	NA
2	ENSDARG00000002353	tagapa	56.5808	16.6305	1.76648	0.973	0.75	4.49411e-99	1.24541e-94	T cell activation RhoGTPase activating protein a [Source:ZFIN;Acc:ZDB-GENE-040426-1877]	GO:0005096(GTPase activator activity);GO:0007165(signal transduction);GO:0043547(positive regulation of GTPase activity)	NA	NA	NA
2	ENSDARG00000090159	BX005105.1	10.6697	2.4657	2.11345	0.812	0.241	6.57934e-91	1.82327e-86	lysosomal associated membrane protein 3 [Source:NCBI gene;Acc:100003043]	NA	NA	NA	NA
2	ENSDARG00000058673	nkl.2	13.6053	5.06289	1.42613	0.71	0.131	1.02992e-86	2.85411e-82	NK-lysin tandem duplicate 2 [Source:ZFIN;Acc:ZDB-GENE-150806-1]	GO:0006629(lipid metabolic process);GO:0042742(defense response to bacterium)	NA	NA	NA
2	ENSDARG00000077069	srgn	76.5903	28.9861	1.4018	1	0.957	1.6773e-85	4.64814e-81	serglycin [Source:ZFIN;Acc:ZDB-GENE-030131-7127]	NA	NA	K06849	NA
2	ENSDARG00000060498	tnfrsf9a	84.1073	20.409	2.04303	0.933	0.623	1.49378e-81	4.13955e-77	tumor necrosis factor receptor superfamily, member 9a [Source:ZFIN;Acc:ZDB-GENE-060421-8213]	GO:0005515(protein binding);GO:0016020(membrane);GO:0016021(integral component of membrane)	04060(Cytokine-cytokine receptor interaction)	K05146	NA
2	ENSDARG00000111357	tnfsf14	6.30775	1.39561	2.17623	0.549	0.093	6.18537e-68	1.71409e-63	TNF superfamily member 14 [Source:ZFIN;Acc:ZDB-GENE-101109-3]	GO:0005164(tumor necrosis factor receptor binding);GO:0005515(protein binding);GO:0006955(immune response);GO:0016020(membrane);GO:0016021(integral component of membrane)	04060(Cytokine-cytokine receptor interaction);05168(Herpes simplex virus 1 infection)	K05477	NA
2	ENSDARG00000098108	dusp2	62.2411	22.3279	1.47902	0.987	0.722	3.99069e-65	1.1059e-60	dual specificity phosphatase 2 [Source:ZFIN;Acc:ZDB-GENE-040801-188]	GO:0000188(inactivation of MAPK activity);GO:0004721(phosphoprotein phosphatase activity);GO:0004725(protein tyrosine phosphatase activity);GO:0005634(nucleus);GO:0005737(cytoplasm);GO:0006470(protein dephosphorylation);GO:0008138(protein tyrosine/serine/threonine phosphatase activity);GO:0016311(dephosphorylation);GO:0016787(hydrolase activity);GO:0016791(phosphatase activity);GO:0017017(MAP kin…	04010(MAPK signaling pathway)	K04459	3.1.3.48;EC:3.1.3.16
2	ENSDARG00000105263	ccl36.1	17.9919	6.41862	1.48701	0.746	0.208	3.97765e-59	1.10229e-54	chemokine (C-C motif) ligand 36, duplicate 1 [Source:ZFIN;Acc:ZDB-GENE-140718-2]	GO:0002548(monocyte chemotaxis);GO:0005125(cytokine activity);GO:0005576(extracellular region);GO:0005615(extracellular space);GO:0006935(chemotaxis);GO:0006954(inflammatory response);GO:0006955(immune response);GO:0007186(G protein-coupled receptor signaling pathway);GO:0008009(chemokine activity);GO:0010469(regulation of signaling receptor activity);GO:0030593(neutrophil chemotaxis);GO:0043547(…	NA	NA	NA
2	ENSDARG00000090728	tnfrsf9b	22.6098	6.92166	1.70776	0.844	0.556	1.83704e-58	5.09082e-54	tumor necrosis factor receptor superfamily, member 9b [Source:ZFIN;Acc:ZDB-GENE-101109-2]	GO:0005515(protein binding);GO:0016020(membrane);GO:0016021(integral component of membrane)	04060(Cytokine-cytokine receptor interaction)	K05146	NA
2	ENSDARG00000044129	si:ch211-214p16.1	80.8795	40.1465	1.0105	1	0.861	7.1066e-55	1.96938e-50	si:ch211-214p16.1 [Source:NCBI gene;Acc:368901]	NA	NA	NA	NA
2	ENSDARG00000055276	rel	16.1608	6.48382	1.31758	0.884	0.692	6.59451e-50	1.82747e-45	v-rel avian reticuloendotheliosis viral oncogene homolog [Source:ZFIN;Acc:ZDB-GENE-040718-255]	GO:0000122(negative regulation of transcription by RNA polymerase II);GO:0000977(RNA polymerase II regulatory region sequence-specific DNA binding);GO:0000981(DNA-binding transcription factor activity, RNA polymerase II-specific);GO:0003677(DNA binding);GO:0003682(chromatin binding);GO:0003700(DNA-binding transcription factor activity);GO:0005634(nucleus);GO:0005654(nucleoplasm);GO:0005737(cytopl…	NA	K09254	NA
2	ENSDARG00000053136	b2m	69.4185	40.8313	0.765643	1	0.992	3.35862e-49	9.3074e-45	beta-2-microglobulin [Source:ZFIN;Acc:ZDB-GENE-980526-88]	GO:0002376(immune system process);GO:0002474(antigen processing and presentation of peptide antigen via MHC class I);GO:0002755(MyD88-dependent toll-like receptor signaling pathway);GO:0004672(protein kinase activity);GO:0005515(protein binding);GO:0005524(ATP binding);GO:0005576(extracellular region);GO:0006468(protein phosphorylation);GO:0006955(immune response);GO:0007165(signal transduction);…	05168(Herpes simplex virus 1 infection)	K08055	NA
2	ENSDARG00000041923	ccl38.6	16.6153	3.43679	2.27338	0.562	0.143	2.98178e-45	8.26311e-41	chemokine (C-C motif) ligand 38, duplicate 6 [Source:ZFIN;Acc:ZDB-GENE-041014-165]	GO:0005125(cytokine activity);GO:0005576(extracellular region);GO:0005615(extracellular space);GO:0006935(chemotaxis);GO:0006955(immune response);GO:0008009(chemokine activity);GO:0010469(regulation of signaling receptor activity);GO:0060326(cell chemotaxis)	04060(Cytokine-cytokine receptor interaction)	K16596	NA
2	ENSDARG00000104636	si:dkey-112a7.4	12.4279	5.61835	1.14536	0.799	0.697	4.20108e-44	1.1642e-39	si:dkey-112a7.4 [Source:ZFIN;Acc:ZDB-GENE-030131-9661]	GO:0004860(protein kinase inhibitor activity);GO:0006469(negative regulation of protein kinase activity)	NA	NA	NA
2	ENSDARG00000102482	zgc:165573	5.52788	1.76396	1.64791	0.469	0.227	5.93423e-43	1.64449e-38	zgc:165573 [Source:ZFIN;Acc:ZDB-GENE-070615-27]	GO:0003674(molecular_function);GO:0005886(plasma membrane);GO:0016020(membrane);GO:0016021(integral component of membrane)	NA	NA	NA
2	ENSDARG00000091003	il34	5.09023	1.57872	1.68898	0.487	0.159	1.39798e-41	3.87407e-37	interleukin 34 [Source:ZFIN;Acc:ZDB-GENE-050419-150]	GO:0001934(positive regulation of protein phosphorylation);GO:0005157(macrophage colony-stimulating factor receptor binding);GO:0005615(extracellular space);GO:0008284(positive regulation of cell population proliferation)	04060(Cytokine-cytokine receptor interaction)	K22633	NA
2	ENSDARG00000036161	hnrnpa0l.1	29.0919	15.6981	0.890027	0.991	0.943	1.3732e-40	3.8054e-36	heterogeneous nuclear ribonucleoprotein A0, like [Source:ZFIN;Acc:ZDB-GENE-030131-618]	GO:0003676(nucleic acid binding);GO:0003723(RNA binding)	NA	NA	NA
2	ENSDARG00000076532	si:ch211-222l21.1	24.3226	12.0378	1.01472	0.933	0.852	5.13513e-39	1.42305e-34	si:ch211-222l21.1 [Source:ZFIN;Acc:ZDB-GENE-030131-247]	NA	NA	NA	NA
2	ENSDARG00000005481	nfkbiaa	51.76	23.9944	1.10914	0.96	0.882	6.25846e-38	1.73434e-33	nuclear factor of kappa light polypeptide gene enhancer in B-cells inhibitor, alpha a [Source:ZFIN;Acc:ZDB-GENE-040426-2227]	GO:0005515(protein binding);GO:0009615(response to virus);GO:1901532(regulation of hematopoietic progenitor cell differentiation);GO:1901533(negative regulation of hematopoietic progenitor cell differentiation)	04210(Apoptosis);04620(Toll-like receptor signaling pathway);04621(NOD-like receptor signaling pathway);04622(RIG-I-like receptor signaling pathway);04623(Cytosolic DNA-sensing pathway);04625(C-type lectin receptor signaling pathway);04920(Adipocytokine signaling pathway);05168(Herpes simplex virus 1 infection)	K04734	NA
2	ENSDARG00000000183	ptpn4b	8.44483	3.33373	1.34093	0.674	0.392	1.12444e-37	3.11606e-33	protein tyrosine phosphatase, non-receptor type 4b [Source:ZFIN;Acc:ZDB-GENE-030131-6259]	GO:0004721(phosphoprotein phosphatase activity);GO:0004725(protein tyrosine phosphatase activity);GO:0005515(protein binding);GO:0005737(cytoplasm);GO:0005856(cytoskeleton);GO:0006470(protein dephosphorylation);GO:0008092(cytoskeletal protein binding);GO:0016311(dephosphorylation);GO:0016787(hydrolase activity);GO:0016791(phosphatase activity);GO:0035335(peptidyl-tyrosine dephosphorylation)	NA	K18037	EC:3.1.3.48
2	ENSDARG00000070792	lrrc15	3.32325	1.20257	1.46647	0.371	0.138	1.56465e-36	4.33596e-32	leucine rich repeat containing 15 [Source:ZFIN;Acc:ZDB-GENE-031113-8]	GO:0005515(protein binding);GO:0016020(membrane);GO:0016021(integral component of membrane)	NA	NA	NA
2	ENSDARG00000098293	si:dkey-27i16.2	33.1581	14.6559	1.17788	0.933	0.726	1.53154e-35	4.2442e-31	si:dkey-27i16.2 [Source:ZFIN;Acc:ZDB-GENE-030131-9667]	GO:0051726(regulation of cell cycle)	NA	NA	NA
2	ENSDARG00000079553	cd83	15.2009	5.54604	1.45463	0.723	0.517	5.00742e-35	1.38766e-30	CD83 molecule [Source:ZFIN;Acc:ZDB-GENE-060503-762]	GO:0002286(T cell activation involved in immune response);GO:0002468(dendritic cell antigen processing and presentation);GO:0009986(cell surface);GO:0016020(membrane);GO:0016021(integral component of membrane);GO:0071753(IgM immunoglobulin complex)	NA	K06510	NA
2	ENSDARG00000061757	rabgap1l	3.29691	1.36312	1.27421	0.397	0.222	8.66965e-35	2.40253e-30	RAB GTPase activating protein 1-like [Source:ZFIN;Acc:ZDB-GENE-050208-389]	GO:0005096(GTPase activator activity);GO:0005515(protein binding);GO:0005623(cell);GO:0006886(intracellular protein transport);GO:0017137(Rab GTPase binding);GO:0043547(positive regulation of GTPase activity);GO:0090630(activation of GTPase activity)	NA	K20284	NA
2	ENSDARG00000009505	prelid3b	9.24411	5.51	0.746481	0.737	0.753	3.28885e-34	9.11405e-30	PRELI domain containing 3 [Source:ZFIN;Acc:ZDB-GENE-031002-13]	GO:0005758(mitochondrial intermembrane space);GO:0015914(phospholipid transport);GO:1990050(phosphatidic acid transporter activity)	NA	NA	NA
2	ENSDARG00000027744	gadd45ba	12.3822	4.5254	1.45216	0.656	0.444	1.00329e-31	2.78031e-27	growth arrest and DNA-damage-inducible, beta a [Source:ZFIN;Acc:ZDB-GENE-040426-1971]	GO:0000185(activation of MAPKKK activity);GO:0001756(somitogenesis);GO:0005634(nucleus);GO:0005737(cytoplasm);GO:0046686(response to cadmium ion);GO:0051597(response to methylmercury);GO:0051726(regulation of cell cycle)	04010(MAPK signaling pathway);04068(FoxO signaling pathway);04110(Cell cycle);04115(p53 signaling pathway);04210(Apoptosis);04218(Cellular senescence)	K04402	NA
2	ENSDARG00000013598	tnfb	29.4385	9.70236	1.6013	0.75	0.457	1.06465e-31	2.95037e-27	tumor necrosis factor b (TNF superfamily, member 2) [Source:ZFIN;Acc:ZDB-GENE-050601-2]	GO:0001889(liver development);GO:0005125(cytokine activity);GO:0005164(tumor necrosis factor receptor binding);GO:0005515(protein binding);GO:0005615(extracellular space);GO:0006955(immune response);GO:0010469(regulation of signaling receptor activity);GO:0016020(membrane);GO:0016021(integral component of membrane)	04060(Cytokine-cytokine receptor interaction);05168(Herpes simplex virus 1 infection)	K05468	NA
2	ENSDARG00000015887	b2ml	31.4944	20.2652	0.636088	0.996	0.976	1.9404e-31	5.37723e-27	beta-2-microglobulin, like [Source:ZFIN;Acc:ZDB-GENE-040426-2136]	GO:0002376(immune system process);GO:0002474(antigen processing and presentation of peptide antigen via MHC class I);GO:0005576(extracellular region);GO:0006955(immune response);GO:0042612(MHC class I protein complex)	05168(Herpes simplex virus 1 infection)	K08055	NA
2	ENSDARG00000069482	traf1	13.1298	6.00221	1.12928	0.759	0.501	3.02402e-31	8.38016e-27	TNF receptor-associated factor 1 [Source:ZFIN;Acc:ZDB-GENE-071120-4]	GO:0005164(tumor necrosis factor receptor binding);GO:0005515(protein binding);GO:0007165(signal transduction);GO:0008270(zinc ion binding);GO:0031625(ubiquitin protein ligase binding);GO:0031996(thioesterase binding);GO:0032991(protein-containing complex);GO:0042981(regulation of apoptotic process);GO:0046872(metal ion binding)	04210(Apoptosis)	K03172	NA
2	ENSDARG00000002663	optn	6.94387	3.53367	0.974574	0.612	0.531	3.66648e-31	1.01605e-26	optineurin [Source:ZFIN;Acc:ZDB-GENE-030131-8103]	GO:0005794(Golgi apparatus);GO:0006914(autophagy);GO:0016192(vesicle-mediated transport);GO:0031410(cytoplasmic vesicle);GO:0070530(K63-linked polyubiquitin modification-dependent protein binding)	04137(Mitophagy - animal)	K19946	NA
2	ENSDARG00000059906	sdc4	8.72197	3.50885	1.31366	0.603	0.391	4.20688e-31	1.16581e-26	syndecan 4 [Source:ZFIN;Acc:ZDB-GENE-061111-1]	GO:0005546(phosphatidylinositol-4,5-bisphosphate binding);GO:0005925(focal adhesion);GO:0007155(cell adhesion);GO:0009986(cell surface);GO:0016020(membrane);GO:0016021(integral component of membrane);GO:0016477(cell migration);GO:0033627(cell adhesion mediated by integrin);GO:0036445(neuronal stem cell division);GO:0042060(wound healing);GO:0043149(stress fiber assembly);GO:0055113(epiboly involv…	04512(ECM-receptor interaction);04514(Cell adhesion molecules (CAMs))	K16338	NA
2	ENSDARG00000098671	prelid1a	2.88959	1.83275	0.656857	0.379	0.384	1.82247e-30	5.05042e-26	PRELI domain containing 1a [Source:ZFIN;Acc:ZDB-GENE-040426-1341]	GO:0005758(mitochondrial intermembrane space);GO:0015914(phospholipid transport);GO:1990050(phosphatidic acid transporter activity)	NA	NA	NA
2	ENSDARG00000025326	myl12.2	1.84237	0.835971	1.14004	0.219	0.101	3.13733e-30	8.69416e-26	myosin, light chain 12, genome duplicate 2 [Source:ZFIN;Acc:ZDB-GENE-030131-9028]	GO:0005509(calcium ion binding)	04510(Focal adhesion);04530(Tight junction);04810(Regulation of actin cytoskeleton)	K12757	NA
2	ENSDARG00000075720	il2rb	5.43234	2.35362	1.20669	0.562	0.258	1.18566e-29	3.28571e-25	interleukin 2 receptor, beta [Source:ZFIN;Acc:ZDB-GENE-080108-2]	GO:0004896(cytokine receptor activity);GO:0005515(protein binding);GO:0016020(membrane);GO:0016021(integral component of membrane);GO:0019221(cytokine-mediated signaling pathway)	04060(Cytokine-cytokine receptor interaction);04144(Endocytosis)	K05069	NA
2	ENSDARG00000105287	mpp1	5.95411	2.27721	1.38662	0.5	0.298	1.51385e-29	4.19519e-25	membrane protein, palmitoylated 1 [Source:ZFIN;Acc:ZDB-GENE-031113-4]	GO:0005515(protein binding)	NA	K21880	NA
2	ENSDARG00000078249	unc13d	6.87826	3.64513	0.916072	0.594	0.511	4.50194e-29	1.24758e-24	unc-13 homolog D (C. elegans) [Source:ZFIN;Acc:ZDB-GENE-110411-188]	NA	NA	K19728	NA
2	ENSDARG00000023472	ctnnb2	6.25929	3.10347	1.01212	0.621	0.453	1.44068e-28	3.99242e-24	catenin, beta 2 [Source:ZFIN;Acc:ZDB-GENE-040426-2575]	GO:0003713(transcription coactivator activity);GO:0005515(protein binding);GO:0005634(nucleus);GO:0005913(cell-cell adherens junction);GO:0007155(cell adhesion);GO:0009950(dorsal/ventral axis specification);GO:0009953(dorsal/ventral pattern formation);GO:0016342(catenin complex);GO:0019903(protein phosphatase binding);GO:0035257(nuclear hormone receptor binding);GO:0045294(alpha-catenin binding);…	NA	NA	NA
2	ENSDARG00000069290	bida	5.07668	2.9555	0.780481	0.54	0.518	2.3175e-28	6.42225e-24	BH3 interacting domain death agonist [Source:ZFIN;Acc:ZDB-GENE-050419-35]	GO:0005737(cytoplasm);GO:0042981(regulation of apoptotic process);GO:0043065(positive regulation of apoptotic process)	04115(p53 signaling pathway);04210(Apoptosis);04217(Necroptosis);05168(Herpes simplex virus 1 infection)	K04726	NA
2	ENSDARG00000089156	egr3	12.1622	5.39361	1.17308	0.683	0.435	2.37433e-28	6.57975e-24	early growth response 3 [Source:ZFIN;Acc:ZDB-GENE-040718-394]	GO:0000981(DNA-binding transcription factor activity, RNA polymerase II-specific);GO:0003676(nucleic acid binding);GO:0003677(DNA binding);GO:0005634(nucleus);GO:0006357(regulation of transcription by RNA polymerase II);GO:0046872(metal ion binding)	04625(C-type lectin receptor signaling pathway)	K12497	NA
2	ENSDARG00000011334	ncaldb	5.57555	2.87634	0.95488	0.513	0.455	5.81939e-28	1.61267e-23	neurocalcin delta b [Source:ZFIN;Acc:ZDB-GENE-040808-37]	GO:0005509(calcium ion binding);GO:0005575(cellular_component);GO:0046872(metal ion binding);GO:0048841(regulation of axon extension involved in axon guidance)	NA	NA	NA
2	ENSDARG00000007693	nfkbiab	20.471	10.1356	1.01415	0.826	0.774	7.45228e-28	2.06517e-23	nuclear factor of kappa light polypeptide gene enhancer in B-cells inhibitor, alpha b [Source:ZFIN;Acc:ZDB-GENE-030131-1819]	GO:0005515(protein binding)	04210(Apoptosis);04620(Toll-like receptor signaling pathway);04621(NOD-like receptor signaling pathway);04622(RIG-I-like receptor signaling pathway);04623(Cytosolic DNA-sensing pathway);04625(C-type lectin receptor signaling pathway);04920(Adipocytokine signaling pathway);05168(Herpes simplex virus 1 infection)	K04734	NA
2	ENSDARG00000009753	sf3b6	2.34335	1.48385	0.659232	0.317	0.322	2.20944e-27	6.12279e-23	splicing factor 3b, subunit 6 [Source:ZFIN;Acc:ZDB-GENE-040625-36]	GO:0000398(mRNA splicing, via spliceosome);GO:0003676(nucleic acid binding);GO:0003723(RNA binding);GO:0005686(U2 snRNP);GO:0005689(U12-type spliceosomal complex);GO:0071013(catalytic step 2 spliceosome)	03040(Spliceosome)	K12833	NA
2	ENSDARG00000059337	tgif1	4.48516	2.28863	0.970675	0.5	0.368	2.23783e-27	6.20147e-23	TGFB-induced factor homeobox 1 [Source:ZFIN;Acc:ZDB-GENE-030131-475]	GO:0003677(DNA binding);GO:0005634(nucleus);GO:0006355(regulation of transcription, DNA-templated);GO:0017015(regulation of transforming growth factor beta receptor signaling pathway);GO:0021797(forebrain anterior/posterior pattern specification);GO:0048385(regulation of retinoic acid receptor signaling pathway);GO:0048854(brain morphogenesis);GO:0070654(sensory epithelium regeneration);GO:007209…	04350(TGF-beta signaling pathway)	K19383	NA
2	ENSDARG00000007743	il15l	9.6667	3.35371	1.52727	0.536	0.281	2.49628e-27	6.91769e-23	interleukin 15, like [Source:ZFIN;Acc:ZDB-GENE-041111-173]	GO:0005125(cytokine activity);GO:0005126(cytokine receptor binding);GO:0005576(extracellular region);GO:0005615(extracellular space);GO:0006955(immune response);GO:0010469(regulation of signaling receptor activity);GO:0016020(membrane);GO:0016021(integral component of membrane)	NA	NA	NA
2	ENSDARG00000102320	mob1a	2.77358	2.24131	0.307405	0.348	0.485	1.96883e-26	5.45603e-22	MOB kinase activator 1A [Source:ZFIN;Acc:ZDB-GENE-030131-6506]	GO:0001756(somitogenesis);GO:0005575(cellular_component);GO:0007417(central nervous system development);GO:0008283(cell population proliferation);GO:0043009(chordate embryonic development)	NA	NA	NA
2	ENSDARG00000074201	flna	3.63436	1.62673	1.15973	0.397	0.165	1.96941e-26	5.45762e-22	filamin A, alpha (actin binding protein 280) [Source:ZFIN;Acc:ZDB-GENE-030131-2145]	GO:0003779(actin binding);GO:0005515(protein binding);GO:0051015(actin filament binding)	04010(MAPK signaling pathway);04510(Focal adhesion);05132(Salmonella infection)	K04437	NA
2	ENSDARG00000045190	ch25h	5.43313	1.44454	1.91117	0.286	0.091	3.17108e-26	8.78769e-22	cholesterol 25-hydroxylase [Source:ZFIN;Acc:ZDB-GENE-041212-81]	GO:0000254(C-4 methylsterol oxidase activity);GO:0001567(cholesterol 25-hydroxylase activity);GO:0004497(monooxygenase activity);GO:0005506(iron ion binding);GO:0005783(endoplasmic reticulum);GO:0005789(endoplasmic reticulum membrane);GO:0006629(lipid metabolic process);GO:0006694(steroid biosynthetic process);GO:0008202(steroid metabolic process);GO:0008203(cholesterol metabolic process);GO:0008…	00120(Primary bile acid biosynthesis)	K10223	EC:1.14.99.38
2	ENSDARG00000000460	nitr2b	2.61838	0.847402	1.62756	0.21	0.028	1.33775e-25	3.70719e-21	novel immune-type receptor 2b [Source:ZFIN;Acc:ZDB-GENE-001106-6]	GO:0016020(membrane);GO:0016021(integral component of membrane)	NA	NA	NA
2	ENSDARG00000058354	selenot1a	2.09493	1.49562	0.486159	0.277	0.345	1.5861e-25	4.3954e-21	selenoprotein T, 1a [Source:ZFIN;Acc:ZDB-GENE-030327-6]	GO:0004791(thioredoxin-disulfide reductase activity);GO:0005783(endoplasmic reticulum);GO:0005789(endoplasmic reticulum membrane);GO:0016020(membrane);GO:0016021(integral component of membrane);GO:0016491(oxidoreductase activity);GO:0055114(oxidation-reduction process);GO:0098869(cellular oxidant detoxification)	NA	K22366	NA
2	ENSDARG00000020187	GCA	3.10588	2.20996	0.490979	0.424	0.473	1.87709e-25	5.2018e-21	zgc:92027 [Source:ZFIN;Acc:ZDB-GENE-040930-3]	GO:0005509(calcium ion binding)	NA	NA	NA
2	ENSDARG00000038687	nfkb2	6.49617	3.73455	0.798655	0.589	0.554	2.58794e-25	7.17171e-21	nuclear factor of kappa light polypeptide gene enhancer in B-cells 2 (p49/p100) [Source:ZFIN;Acc:ZDB-GENE-030131-6701]	GO:0001525(angiogenesis);GO:0003677(DNA binding);GO:0003700(DNA-binding transcription factor activity);GO:0005515(protein binding);GO:0005634(nucleus);GO:0005737(cytoplasm);GO:0006355(regulation of transcription, DNA-templated);GO:0007165(signal transduction)	04010(MAPK signaling pathway);04625(C-type lectin receptor signaling pathway)	K04469	NA
2	ENSDARG00000078775	RASA2	4.96858	2.70138	0.879137	0.5	0.446	3.08186e-25	8.54044e-21	RAS p21 protein activator 2 [Source:NCBI gene;Acc:100331895]	GO:0005096(GTPase activator activity);GO:0005543(phospholipid binding);GO:0007165(signal transduction);GO:0035556(intracellular signal transduction);GO:0043087(regulation of GTPase activity);GO:0043547(positive regulation of GTPase activity);GO:0046580(negative regulation of Ras protein signal transduction)	04010(MAPK signaling pathway)	K08053	NA
2	ENSDARG00000007960	hnrnpaba	6.74461	4.49901	0.584126	0.67	0.71	3.17528e-25	8.79932e-21	heterogeneous nuclear ribonucleoprotein A/Ba [Source:ZFIN;Acc:ZDB-GENE-030131-185]	GO:0003676(nucleic acid binding);GO:0003723(RNA binding);GO:0005654(nucleoplasm);GO:0043565(sequence-specific DNA binding);GO:1990837(sequence-specific double-stranded DNA binding);GO:1990904(ribonucleoprotein complex)	NA	K13044	NA
2	ENSDARG00000039830	gng5	2.95501	2.33648	0.338826	0.397	0.484	3.19753e-25	8.861e-21	guanine nucleotide binding protein (G protein), gamma 5 [Source:ZFIN;Acc:ZDB-GENE-030131-9966]	GO:0003924(GTPase activity);GO:0005515(protein binding);GO:0005834(heterotrimeric G-protein complex);GO:0005886(plasma membrane);GO:0007165(signal transduction);GO:0007186(G protein-coupled receptor signaling pathway);GO:0016020(membrane);GO:0030165(PDZ domain binding);GO:0031680(G-protein beta/gamma-subunit complex);GO:0072513(positive regulation of secondary heart field cardioblast proliferatio…	04371(Apelin signaling pathway)	K04542	NA
2	ENSDARG00000013979	ndfip1	2.61193	1.92799	0.438019	0.357	0.422	3.5855e-25	9.93614e-21	Nedd4 family interacting protein 1 [Source:ZFIN;Acc:ZDB-GENE-030131-2767]	GO:0002761(regulation of myeloid leukocyte differentiation);GO:0002829(negative regulation of type 2 immune response);GO:0005794(Golgi apparatus);GO:0005938(cell cortex);GO:0006879(cellular iron ion homeostasis);GO:0007034(vacuolar transport);GO:0010629(negative regulation of gene expression);GO:0016020(membrane);GO:0016021(integral component of membrane);GO:0030001(metal ion transport);GO:003139…	NA	NA	NA
2	ENSDARG00000103718	chmp5b	3.09138	1.9865	0.638025	0.393	0.402	3.66405e-25	1.01538e-20	charged multivesicular body protein 5b [Source:ZFIN;Acc:ZDB-GENE-040426-1374]	GO:0003674(molecular_function);GO:0005737(cytoplasm);GO:0005768(endosome);GO:0005829(cytosol);GO:0007034(vacuolar transport);GO:0010008(endosome membrane);GO:0015031(protein transport);GO:0016020(membrane)	04144(Endocytosis);04217(Necroptosis)	K12198	NA
2	ENSDARG00000042940	nab1a	8.63844	3.95608	1.1267	0.612	0.394	5.00847e-25	1.38795e-20	NGFI-A binding protein 1a (EGR1 binding protein 1) [Source:ZFIN;Acc:ZDB-GENE-050208-574]	GO:0005634(nucleus);GO:0006355(regulation of transcription, DNA-templated);GO:0045892(negative regulation of transcription, DNA-templated);GO:0140110(transcription regulator activity)	NA	K22388	NA
2	ENSDARG00000074501	tnip2	3.69884	2.06017	0.844312	0.402	0.35	5.16662e-25	1.43177e-20	TNFAIP3 interacting protein 2 [Source:ZFIN;Acc:ZDB-GENE-120913-2]	GO:0070530(K63-linked polyubiquitin modification-dependent protein binding)	NA	NA	NA
2	ENSDARG00000102741	sumo2b	2.68549	1.82702	0.555694	0.348	0.393	5.58291e-25	1.54714e-20	small ubiquitin-like modifier 2b [Source:ZFIN;Acc:ZDB-GENE-040801-7]	GO:0005515(protein binding);GO:0005634(nucleus);GO:0016925(protein sumoylation);GO:0031386(protein tag);GO:0043009(chordate embryonic development);GO:0044389(ubiquitin-like protein ligase binding);GO:0060216(definitive hemopoiesis)	03013(RNA transport)	K12160	NA
2	ENSDARG00000074378	junba	10.4041	5.2185	0.995449	0.723	0.557	5.9943e-25	1.66114e-20	JunB proto-oncogene, AP-1 transcription factor subunit a [Source:ZFIN;Acc:ZDB-GENE-040426-2172]	GO:0000122(negative regulation of transcription by RNA polymerase II);GO:0000790(nuclear chromatin);GO:0000978(RNA polymerase II proximal promoter sequence-specific DNA binding);GO:0000981(DNA-binding transcription factor activity, RNA polymerase II-specific);GO:0001945(lymph vessel development);GO:0003677(DNA binding);GO:0003700(DNA-binding transcription factor activity);GO:0003713(transcription…	NA	K09028	NA
2	ENSDARG00000056438	her9	6.85418	2.28751	1.58321	0.438	0.168	6.70327e-25	1.85761e-20	hairy-related 9 [Source:ZFIN;Acc:ZDB-GENE-011213-1]	GO:0000977(RNA polymerase II regulatory region sequence-specific DNA binding);GO:0001756(somitogenesis);GO:0003677(DNA binding);GO:0003714(transcription corepressor activity);GO:0005634(nucleus);GO:0006355(regulation of transcription, DNA-templated);GO:0007219(Notch signaling pathway);GO:0008134(transcription factor binding);GO:0030154(cell differentiation);GO:0043565(sequence-specific DNA bindin…	03460(Fanconi anemia pathway);04330(Notch signaling pathway)	K06054	NA
2	ENSDARG00000104066	dnaja2a	3.88924	2.94538	0.401035	0.446	0.565	9.3871e-25	2.60135e-20	DnaJ heat shock protein family (Hsp40) member A2a [Source:ZFIN;Acc:ZDB-GENE-040426-2884]	GO:0005524(ATP binding);GO:0005829(cytosol);GO:0006457(protein folding);GO:0009408(response to heat);GO:0031072(heat shock protein binding);GO:0046872(metal ion binding);GO:0051082(unfolded protein binding)	04141(Protein processing in endoplasmic reticulum)	K09503	NA
2	ENSDARG00000067713	snx18a	2.26942	1.10165	1.04266	0.29	0.158	1.19604e-24	3.31447e-20	sorting nexin 18a [Source:NCBI gene;Acc:562372]	GO:0000278(mitotic cell cycle);GO:0005515(protein binding);GO:0015031(protein transport);GO:0016020(membrane);GO:0030659(cytoplasmic vesicle membrane);GO:0031410(cytoplasmic vesicle);GO:0035091(phosphatidylinositol binding)	NA	K17923	NA
2	ENSDARG00000057491	n4bp1	7.40943	4.0408	0.874721	0.625	0.556	1.28521e-24	3.56158e-20	nedd4 binding protein 1 [Source:ZFIN;Acc:ZDB-GENE-030131-5538]	GO:0003723(RNA binding);GO:0005634(nucleus);GO:0005730(nucleolus);GO:0016605(PML body);GO:0031397(negative regulation of protein ubiquitination);GO:0032435(negative regulation of proteasomal ubiquitin-dependent protein catabolic process)	NA	NA	NA
2	ENSDARG00000000690	sypl2b	2.37777	1.68843	0.493925	0.299	0.362	1.48603e-24	4.11808e-20	synaptophysin-like 2b [Source:ZFIN;Acc:ZDB-GENE-050417-309]	GO:0008021(synaptic vesicle);GO:0016020(membrane);GO:0016021(integral component of membrane)	NA	NA	NA
2	ENSDARG00000092074	hcst	3.2308	1.53916	1.06974	0.393	0.222	1.76703e-24	4.89678e-20	hematopoietic cell signal transducer [Source:ZFIN;Acc:ZDB-GENE-061130-1]	GO:0005102(signaling receptor binding);GO:0014068(positive regulation of phosphatidylinositol 3-kinase signaling);GO:0016020(membrane);GO:0016021(integral component of membrane);GO:0043548(phosphatidylinositol 3-kinase binding);GO:0050776(regulation of immune response)	NA	NA	NA
2	ENSDARG00000046106	rab10	2.14333	1.75676	0.286937	0.317	0.416	2.42678e-24	6.72509e-20	RAB10, member RAS oncogene family [Source:ZFIN;Acc:ZDB-GENE-040718-304]	GO:0003924(GTPase activity);GO:0005525(GTP binding);GO:0005768(endosome);GO:0005794(Golgi apparatus);GO:0005886(plasma membrane);GO:0006886(intracellular protein transport);GO:0006904(vesicle docking involved in exocytosis);GO:0008021(synaptic vesicle);GO:0009306(protein secretion);GO:0017157(regulation of exocytosis);GO:0032482(Rab protein signal transduction);GO:0032593(insulin-responsive compa…	04144(Endocytosis)	K07903	NA
2	ENSDARG00000099865	hnrnpabb	3.59252	2.56796	0.484373	0.406	0.483	2.4446e-24	6.77447e-20	heterogeneous nuclear ribonucleoprotein A/Bb [Source:ZFIN;Acc:ZDB-GENE-040426-2516]	GO:0003676(nucleic acid binding);GO:0003723(RNA binding);GO:0005654(nucleoplasm);GO:0043565(sequence-specific DNA binding);GO:1990837(sequence-specific double-stranded DNA binding);GO:1990904(ribonucleoprotein complex)	NA	NA	NA
2	ENSDARG00000035676	ptp4a2b	8.71126	4.93407	0.820103	0.674	0.666	2.91118e-24	8.06746e-20	protein tyrosine phosphatase type IVA, member 2b [Source:ZFIN;Acc:ZDB-GENE-041114-111]	GO:0004725(protein tyrosine phosphatase activity);GO:0005634(nucleus);GO:0005737(cytoplasm);GO:0006470(protein dephosphorylation);GO:0008138(protein tyrosine/serine/threonine phosphatase activity);GO:0016311(dephosphorylation);GO:0016791(phosphatase activity);GO:0035335(peptidyl-tyrosine dephosphorylation)	NA	K18041	EC:3.1.3.48
2	ENSDARG00000027141	ube2l3b	2.08092	1.63175	0.350802	0.268	0.373	2.99849e-24	8.30942e-20	ubiquitin-conjugating enzyme E2L 3b [Source:ZFIN;Acc:ZDB-GENE-030131-662]	GO:0000151(ubiquitin ligase complex);GO:0000166(nucleotide binding);GO:0005524(ATP binding);GO:0006511(ubiquitin-dependent protein catabolic process);GO:0016567(protein ubiquitination);GO:0016740(transferase activity);GO:0031625(ubiquitin protein ligase binding);GO:0061631(ubiquitin conjugating enzyme activity)	04120(Ubiquitin mediated proteolysis)	K04552	EC:2.3.2.23
2	ENSDARG00000015653	tnip1	12.1704	6.655	0.870866	0.763	0.653	3.30443e-24	9.15722e-20	TNFAIP3 interacting protein 1 [Source:ZFIN;Acc:ZDB-GENE-070112-1502]	GO:0002755(MyD88-dependent toll-like receptor signaling pathway);GO:0043124(negative regulation of I-kappaB kinase/NF-kappaB signaling);GO:0050727(regulation of inflammatory response);GO:0070373(negative regulation of ERK1 and ERK2 cascade)	NA	NA	NA
2	ENSDARG00000042322	si:dkey-177p2.6	3.2309	1.93386	0.740452	0.397	0.344	3.8781e-24	1.0747e-19	si:dkey-177p2.6 [Source:ZFIN;Acc:ZDB-GENE-030131-5926]	GO:0003674(molecular_function);GO:0005575(cellular_component);GO:0008150(biological_process)	NA	NA	NA
2	ENSDARG00000042539	ywhaqa	2.93544	2.17378	0.433374	0.326	0.43	4.32076e-24	1.19737e-19	tyrosine 3-monooxygenase/tryptophan 5-monooxygenase activation protein, theta polypeptide a [Source:ZFIN;Acc:ZDB-GENE-040122-5]	GO:0004497(monooxygenase activity);GO:0019904(protein domain specific binding);GO:0055114(oxidation-reduction process)	04110(Cell cycle);04114(Oocyte meiosis)	K16197	NA
2	ENSDARG00000068995	h2afx1	4.89851	3.18522	0.620951	0.504	0.535	5.03683e-24	1.39581e-19	H2A histone family member X1 [Source:ZFIN;Acc:ZDB-GENE-041010-42]	GO:0000786(nucleosome);GO:0000790(nuclear chromatin);GO:0003677(DNA binding);GO:0005615(extracellular space);GO:0005634(nucleus);GO:0005694(chromosome);GO:0006325(chromatin organization);GO:0045087(innate immune response);GO:0046982(protein heterodimerization activity);GO:0050830(defense response to Gram-positive bacterium);GO:0051673(membrane disruption in other organism)	04217(Necroptosis)	K11251	NA
2	ENSDARG00000033928	ndfip2	4.49353	3.28298	0.452844	0.496	0.566	8.67273e-24	2.40339e-19	Nedd4 family interacting protein 2 [Source:ZFIN;Acc:ZDB-GENE-040426-2662]	GO:0005739(mitochondrion);GO:0005783(endoplasmic reticulum);GO:0005794(Golgi apparatus);GO:0007034(vacuolar transport);GO:0010629(negative regulation of gene expression);GO:0016020(membrane);GO:0016021(integral component of membrane);GO:0030001(metal ion transport);GO:0031398(positive regulation of protein ubiquitination);GO:0032410(negative regulation of transporter activity);GO:0048471(perinucl…	NA	NA	NA
2	ENSDARG00000070472	arf5	3.21774	2.08128	0.628579	0.429	0.421	1.22302e-23	3.38922e-19	ADP-ribosylation factor 5 [Source:ZFIN;Acc:ZDB-GENE-030910-5]	GO:0000166(nucleotide binding);GO:0005525(GTP binding)	NA	NA	NA
2	ENSDARG00000031495	seta	2.50054	1.87208	0.417598	0.326	0.404	1.23759e-23	3.42962e-19	SET nuclear proto-oncogene a [Source:ZFIN;Acc:ZDB-GENE-030131-2221]	GO:0005634(nucleus);GO:0006334(nucleosome assembly)	NA	K11290	NA
2	ENSDARG00000045248	h3f3d	16.1272	10.0675	0.679785	0.924	0.892	1.28168e-23	3.5518e-19	H3 histone, family 3D [Source:ZFIN;Acc:ZDB-GENE-040426-1023]	GO:0000786(nucleosome);GO:0003677(DNA binding);GO:0005634(nucleus);GO:0005694(chromosome);GO:0031492(nucleosomal DNA binding);GO:0046982(protein heterodimerization activity)	NA	K11253	NA
2	ENSDARG00000005423	pgam1a	6.72435	4.4341	0.600754	0.625	0.644	1.50714e-23	4.17659e-19	phosphoglycerate mutase 1a [Source:ZFIN;Acc:ZDB-GENE-030131-1827]	GO:0003824(catalytic activity);GO:0004082(bisphosphoglycerate mutase activity);GO:0004619(phosphoglycerate mutase activity);GO:0006096(glycolytic process);GO:0016853(isomerase activity);GO:0016868(intramolecular transferase activity, phosphotransferases)	00010(Glycolysis / Gluconeogenesis);00260(Glycine, serine and threonine metabolism)	K01834	EC:5.4.2.11
2	ENSDARG00000003941	rrs1	3.16792	1.78473	0.827828	0.371	0.309	1.61108e-23	4.46462e-19	RRS1 ribosome biogenesis regulator homolog (S. cerevisiae) [Source:ZFIN;Acc:ZDB-GENE-030131-9345]	GO:0000055(ribosomal large subunit export from nucleus);GO:0000447(endonucleolytic cleavage in ITS1 to separate SSU-rRNA from 5.8S rRNA and LSU-rRNA from tricistronic rRNA transcript (SSU-rRNA, 5.8S rRNA, LSU-rRNA));GO:0003674(molecular_function);GO:0005634(nucleus);GO:0005730(nucleolus);GO:0030687(preribosome, large subunit precursor);GO:0042254(ribosome biogenesis);GO:0042273(ribosomal large su…	NA	K14852	NA
2	ENSDARG00000101766	ptmab	27.1509	16.171	0.74759	0.955	0.937	1.89406e-23	5.24881e-19	prothymosin alpha b [Source:ZFIN;Acc:ZDB-GENE-030131-8681]	GO:0005634(nucleus);GO:0006915(apoptotic process)	NA	K13784	NA
2	ENSDARG00000016516	rbm8a	2.86989	2.13906	0.424018	0.397	0.466	2.54507e-23	7.05291e-19	RNA binding motif protein 8A [Source:ZFIN;Acc:ZDB-GENE-050306-51]	GO:0000184(nuclear-transcribed mRNA catabolic process, nonsense-mediated decay);GO:0000381(regulation of alternative mRNA splicing, via spliceosome);GO:0000398(mRNA splicing, via spliceosome);GO:0003676(nucleic acid binding);GO:0003723(RNA binding);GO:0003729(mRNA binding);GO:0005634(nucleus);GO:0005737(cytoplasm);GO:0006396(RNA processing);GO:0006397(mRNA processing);GO:0006417(regulation of tra…	03013(RNA transport);03015(mRNA surveillance pathway);03040(Spliceosome)	K12876	NA
2	ENSDARG00000090844	CABZ01054965.1	2.92451	1.2743	1.19849	0.317	0.163	2.76145e-23	7.65252e-19	interleukin-1 receptor type 1-like [Source:NCBI gene;Acc:799279]	GO:0005515(protein binding);GO:0007165(signal transduction)	NA	NA	NA
2	ENSDARG00000042864	rpl7l1	2.40028	1.51434	0.664517	0.317	0.31	2.85575e-23	7.91386e-19	ribosomal protein L7-like 1 [Source:ZFIN;Acc:ZDB-GENE-030131-970]	GO:0000463(maturation of LSU-rRNA from tricistronic rRNA transcript (SSU-rRNA, 5.8S rRNA, LSU-rRNA));GO:0003735(structural constituent of ribosome);GO:0005840(ribosome);GO:0022625(cytosolic large ribosomal subunit)	NA	NA	NA
2	ENSDARG00000015722	kctd5a	5.70032	3.64252	0.646108	0.589	0.582	3.38174e-23	9.37147e-19	potassium channel tetramerization domain containing 5a [Source:ZFIN;Acc:ZDB-GENE-030131-727]	GO:0005515(protein binding);GO:0005737(cytoplasm);GO:0031463(Cul3-RING ubiquitin ligase complex);GO:0043161(proteasome-mediated ubiquitin-dependent protein catabolic process);GO:0051260(protein homooligomerization);GO:0097602(cullin family protein binding)	NA	K21914	NA
2	ENSDARG00000099241	ppp2cb	1.88958	1.42339	0.408735	0.259	0.318	3.46049e-23	9.58971e-19	protein phosphatase 2, catalytic subunit, beta isozyme [Source:ZFIN;Acc:ZDB-GENE-040426-2487]	GO:0004721(phosphoprotein phosphatase activity);GO:0005575(cellular_component);GO:0006470(protein dephosphorylation);GO:0016787(hydrolase activity)	03015(mRNA surveillance pathway);04114(Oocyte meiosis);04136(Autophagy - other);04140(Autophagy - animal);04261(Adrenergic signaling in cardiomyocytes);04350(TGF-beta signaling pathway);04530(Tight junction)	K04382	EC:3.1.3.16
2	ENSDARG00000052928	arf6b	2.22873	1.82192	0.290762	0.299	0.399	3.56859e-23	9.88927e-19	ADP-ribosylation factor 6b [Source:ZFIN;Acc:ZDB-GENE-030131-9056]	GO:0000166(nucleotide binding);GO:0001726(ruffle);GO:0005525(GTP binding);GO:0005737(cytoplasm);GO:0005768(endosome);GO:0006886(intracellular protein transport);GO:0016192(vesicle-mediated transport);GO:0030139(endocytic vesicle);GO:0035622(intrahepatic bile duct development);GO:0036010(protein localization to endosome);GO:0055038(recycling endosome membrane);GO:0055113(epiboly involved in gastru…	04144(Endocytosis)	K07941	NA
2	ENSDARG00000009779	mcl1a	52.7668	33.4221	0.65883	1	0.987	4.54595e-23	1.25977e-18	MCL1, BCL2 family apoptosis regulator a [Source:ZFIN;Acc:ZDB-GENE-000511-7]	GO:0001894(tissue homeostasis);GO:0005741(mitochondrial outer membrane);GO:0007088(regulation of mitotic nuclear division);GO:0008630(intrinsic apoptotic signaling pathway in response to DNA damage);GO:0016020(membrane);GO:0016021(integral component of membrane);GO:0042803(protein homodimerization activity);GO:0042981(regulation of apoptotic process);GO:0043009(chordate embryonic development);GO:…	04210(Apoptosis)	K02539	NA
2	ENSDARG00000101767	si:dkey-183i3.6	4.86964	2.07102	1.23347	0.406	0.19	5.94718e-23	1.64808e-18	si:dkey-183i3.6 [Source:ZFIN;Acc:ZDB-GENE-141212-342]	GO:0016020(membrane);GO:0016021(integral component of membrane)	NA	NA	NA
2	ENSDARG00000103118	cib1	1.38518	1.10603	0.324686	0.232	0.275	6.29986e-23	1.74582e-18	calcium and integrin binding 1 (calmyrin) [Source:ZFIN;Acc:ZDB-GENE-050417-170]	GO:0005509(calcium ion binding)	NA	NA	NA
2	ENSDARG00000055080	rbm4.2	3.41407	2.43867	0.485395	0.433	0.467	7.05495e-23	1.95507e-18	RNA binding motif protein 4.2 [Source:ZFIN;Acc:ZDB-GENE-030131-3019]	GO:0000381(regulation of alternative mRNA splicing, via spliceosome);GO:0003676(nucleic acid binding);GO:0003723(RNA binding);GO:0005634(nucleus);GO:0008270(zinc ion binding);GO:0016607(nuclear speck);GO:0045292(mRNA cis splicing, via spliceosome)	NA	NA	NA
2	ENSDARG00000053979	chmp2a	9.38421	5.48984	0.773471	0.786	0.706	1.27705e-22	3.53897e-18	charged multivesicular body protein 2A [Source:ZFIN;Acc:ZDB-GENE-040426-2922]	GO:0007034(vacuolar transport)	04144(Endocytosis);04217(Necroptosis)	K12191	NA
2	ENSDARG00000114387	CU499336.2	4.84206	2.75209	0.815095	0.545	0.408	1.30501e-22	3.61646e-18	NA	NA	NA	NA	NA
2	ENSDARG00000019881	bsg	2.95736	2.2214	0.412842	0.397	0.476	1.33752e-22	3.70653e-18	basigin [Source:ZFIN;Acc:ZDB-GENE-030131-9638]	GO:0005886(plasma membrane);GO:0007156(homophilic cell adhesion via plasma membrane adhesion molecules);GO:0007411(axon guidance);GO:0016020(membrane);GO:0016021(integral component of membrane);GO:0030424(axon);GO:0070593(dendrite self-avoidance);GO:0098632(cell-cell adhesion mediator activity)	NA	K06535	NA
2	ENSDARG00000055365	si:dkey-25e12.3	8.77758	4.95427	0.825152	0.714	0.604	1.43347e-22	3.97242e-18	si:dkey-25e12.3 [Source:ZFIN;Acc:ZDB-GENE-041001-132]	GO:0000166(nucleotide binding);GO:0003824(catalytic activity);GO:0005634(nucleus);GO:0005737(cytoplasm);GO:0016787(hydrolase activity)	NA	NA	NA
2	ENSDARG00000099091	CU929418.1	3.66573	2.12975	0.783415	0.433	0.383	2.0532e-22	5.68982e-18	NA	NA	NA	NA	NA
2	ENSDARG00000044625	pcf11	2.89714	2.13923	0.43754	0.384	0.447	2.98534e-22	8.27296e-18	PCF11, cleavage and polyadenylation factor subunit [Source:ZFIN;Acc:ZDB-GENE-041114-175]	GO:0000993(RNA polymerase II complex binding);GO:0003729(mRNA binding);GO:0005737(cytoplasm);GO:0006369(termination of RNA polymerase II transcription);GO:0006378(mRNA polyadenylation);GO:0006886(intracellular protein transport)	03015(mRNA surveillance pathway)	K14400	NA
2	ENSDARG00000008188	sf1	1.83584	1.30903	0.487943	0.286	0.299	3.11071e-22	8.62039e-18	splicing factor 1 [Source:ZFIN;Acc:ZDB-GENE-030131-2492]	GO:0000398(mRNA splicing, via spliceosome);GO:0003676(nucleic acid binding);GO:0003723(RNA binding);GO:0008270(zinc ion binding);GO:0045131(pre-mRNA branch point binding);GO:0060041(retina development in camera-type eye)	NA	K13095	NA
2	ENSDARG00000103980	ets2	5.99669	3.46456	0.791496	0.464	0.464	3.51437e-22	9.73903e-18	v-ets avian erythroblastosis virus E26 oncogene homolog 2 [Source:ZFIN;Acc:ZDB-GENE-050522-552]	GO:0000981(DNA-binding transcription factor activity, RNA polymerase II-specific);GO:0003677(DNA binding);GO:0003700(DNA-binding transcription factor activity);GO:0005634(nucleus);GO:0006355(regulation of transcription, DNA-templated);GO:0006357(regulation of transcription by RNA polymerase II);GO:0030154(cell differentiation);GO:0043565(sequence-specific DNA binding)	NA	K21932	NA
2	ENSDARG00000020232	eif6	2.68954	1.82914	0.556196	0.362	0.379	3.64197e-22	1.00926e-17	eukaryotic translation initiation factor 6 [Source:ZFIN;Acc:ZDB-GENE-031118-110]	GO:0000054(ribosomal subunit export from nucleus);GO:0003743(translation initiation factor activity);GO:0005634(nucleus);GO:0005730(nucleolus);GO:0005737(cytoplasm);GO:0005829(cytosol);GO:0006412(translation);GO:0006413(translational initiation);GO:0030687(preribosome, large subunit precursor);GO:0042254(ribosome biogenesis);GO:0042256(mature ribosome assembly);GO:0042273(ribosomal large subunit …	03008(Ribosome biogenesis in eukaryotes)	K03264	NA
2	ENSDARG00000002897	si:ch211-160o17.2	2.58965	1.585	0.708272	0.317	0.305	4.74796e-22	1.31575e-17	si:ch211-160o17.2 [Source:ZFIN;Acc:ZDB-GENE-141219-3]	GO:0004441(inositol-1,4-bisphosphate 1-phosphatase activity);GO:0046854(phosphatidylinositol phosphorylation);GO:0046855(inositol phosphate dephosphorylation)	00562(Inositol phosphate metabolism);04070(Phosphatidylinositol signaling system)	K01107	EC:3.1.3.57
2	ENSDARG00000040700	nab1b	1.41311	0.804037	0.813536	0.223	0.101	6.56501e-22	1.81929e-17	NGFI-A binding protein 1b (EGR1 binding protein 1) [Source:ZFIN;Acc:ZDB-GENE-081105-85]	GO:0005634(nucleus);GO:0006355(regulation of transcription, DNA-templated);GO:0045892(negative regulation of transcription, DNA-templated);GO:0140110(transcription regulator activity)	NA	K22388	NA
2	ENSDARG00000002369	UBB	6.08621	4.45417	0.450389	0.567	0.675	8.24742e-22	2.28552e-17	si:ch211-202a12.4 [Source:ZFIN;Acc:ZDB-GENE-030131-8486]	GO:0005515(protein binding);GO:0005634(nucleus);GO:0005737(cytoplasm);GO:0016567(protein ubiquitination);GO:0019941(modification-dependent protein catabolic process);GO:0031386(protein tag);GO:0031625(ubiquitin protein ligase binding)	NA	NA	NA
2	ENSDARG00000020625	jak1	7.14308	4.6821	0.609392	0.701	0.677	8.60722e-22	2.38523e-17	Janus kinase 1 [Source:ZFIN;Acc:ZDB-GENE-980526-142]	GO:0000166(nucleotide binding);GO:0004672(protein kinase activity);GO:0004713(protein tyrosine kinase activity);GO:0004715(non-membrane spanning protein tyrosine kinase activity);GO:0005524(ATP binding);GO:0005856(cytoskeleton);GO:0006468(protein phosphorylation);GO:0016020(membrane);GO:0016301(kinase activity);GO:0016310(phosphorylation);GO:0016740(transferase activity);GO:0018108(peptidyl-tyros…	04217(Necroptosis);04621(NOD-like receptor signaling pathway);05168(Herpes simplex virus 1 infection)	K11217	EC:2.7.10.2
2	ENSDARG00000003681	eif5	3.39248	2.7866	0.283834	0.438	0.552	8.6484e-22	2.39665e-17	eukaryotic translation initiation factor 5 [Source:ZFIN;Acc:ZDB-GENE-030131-975]	GO:0003743(translation initiation factor activity);GO:0005515(protein binding);GO:0006413(translational initiation);GO:0016020(membrane);GO:0016021(integral component of membrane)	03013(RNA transport)	K03262	NA
2	ENSDARG00000054539	lrp10	1.40176	1.09335	0.358489	0.188	0.253	9.77401e-22	2.70857e-17	low density lipoprotein receptor-related protein 10 [Source:ZFIN;Acc:ZDB-GENE-140418-2]	GO:0005515(protein binding)	NA	K20050	NA
2	ENSDARG00000102802	brdt	3.06645	2.1549	0.50895	0.33	0.394	1.01737e-21	2.81933e-17	bromodomain, testis-specific [Source:ZFIN;Acc:ZDB-GENE-030131-5928]	GO:0005515(protein binding)	NA	K11724	NA
2	ENSDARG00000058606	sik1	8.37946	4.45318	0.912022	0.643	0.521	1.12359e-21	3.11369e-17	salt-inducible kinase 1 [Source:ZFIN;Acc:ZDB-GENE-030131-9446]	GO:0004672(protein kinase activity);GO:0004674(protein serine/threonine kinase activity);GO:0005524(ATP binding);GO:0005634(nucleus);GO:0005737(cytoplasm);GO:0006468(protein phosphorylation);GO:0031588(nucleotide-activated protein kinase complex);GO:0032007(negative regulation of TOR signaling);GO:0035556(intracellular signal transduction);GO:0042149(cellular response to glucose starvation)	NA	K19008	EC:2.7.11.1
2	ENSDARG00000052371	higd2a	1.11606	0.872996	0.354363	0.188	0.217	1.15288e-21	3.19487e-17	HIG1 hypoxia inducible domain family, member 2A [Source:ZFIN;Acc:ZDB-GENE-050417-119]	GO:0003674(molecular_function);GO:0008150(biological_process);GO:0016020(membrane);GO:0016021(integral component of membrane)	NA	NA	NA
2	ENSDARG00000039980	ppt1	1.30014	1.02429	0.344051	0.179	0.254	1.4226e-21	3.94231e-17	palmitoyl-protein thioesterase 1 (ceroid-lipofuscinosis, neuronal 1, infantile) [Source:ZFIN;Acc:ZDB-GENE-040426-2653]	GO:0002084(protein depalmitoylation);GO:0005764(lysosome);GO:0006898(receptor-mediated endocytosis);GO:0008474(palmitoyl-(protein) hydrolase activity);GO:0098599(palmitoyl hydrolase activity)	00062(Fatty acid elongation);04142(Lysosome)	K01074	EC:3.1.2.22
2	ENSDARG00000099730	pkma	7.3252	5.51427	0.4097	0.652	0.735	1.55933e-21	4.32121e-17	pyruvate kinase M1/2a [Source:ZFIN;Acc:ZDB-GENE-031201-4]	GO:0000287(magnesium ion binding);GO:0003824(catalytic activity);GO:0004743(pyruvate kinase activity);GO:0005737(cytoplasm);GO:0006096(glycolytic process);GO:0016301(kinase activity);GO:0016310(phosphorylation);GO:0016740(transferase activity);GO:0030955(potassium ion binding);GO:0032869(cellular response to insulin stimulus)	00010(Glycolysis / Gluconeogenesis);00230(Purine metabolism);00620(Pyruvate metabolism)	K00873	EC:2.7.1.40
2	ENSDARG00000078824	si:ch211-66e2.3	3.41062	1.63789	1.0582	0.411	0.205	1.75584e-21	4.86577e-17	si:ch211-66e2.3 [Source:ZFIN;Acc:ZDB-GENE-080226-7]	GO:0016020(membrane);GO:0098609(cell-cell adhesion)	NA	NA	NA
2	ENSDARG00000069100	aldh9a1a.1	1.34429	0.861857	0.641328	0.192	0.164	2.21937e-21	6.15033e-17	aldehyde dehydrogenase 9 family, member A1a, tandem duplicate 1 [Source:ZFIN;Acc:ZDB-GENE-030131-1257]	GO:0004029(aldehyde dehydrogenase (NAD) activity);GO:0005737(cytoplasm);GO:0016491(oxidoreductase activity);GO:0016620(oxidoreductase activity, acting on the aldehyde or oxo group of donors, NAD or NADP as acceptor);GO:0019145(aminobutyraldehyde dehydrogenase activity);GO:0043878(glyceraldehyde-3-phosphate dehydrogenase (NAD+) (non-phosphorylating) activity);GO:0047105(4-trimethylammoniobutyralde…	00010(Glycolysis / Gluconeogenesis);00053(Ascorbate and aldarate metabolism);00071(Fatty acid degradation);00280(Valine, leucine and isoleucine degradation);00310(Lysine degradation);00330(Arginine and proline metabolism);00340(Histidine metabolism);00380(Tryptophan metabolism);00410(beta-Alanine metabolism);00561(Glycerolipid metabolism);00620(Pyruvate metabolism)	K00149	1.2.1.3;EC:1.2.1.47
2	ENSDARG00000003920	setb	4.09309	3.0864	0.407267	0.5	0.557	2.24328e-21	6.21658e-17	SET nuclear proto-oncogene b [Source:ZFIN;Acc:ZDB-GENE-030131-433]	GO:0005634(nucleus);GO:0006334(nucleosome assembly);GO:0048884(neuromast development)	NA	K11290	NA
2	ENSDARG00000028106	glrx	3.48062	2.66085	0.387457	0.415	0.491	2.37555e-21	6.58313e-17	glutaredoxin (thioltransferase) [Source:ZFIN;Acc:ZDB-GENE-041010-11]	GO:0005575(cellular_component);GO:0005623(cell);GO:0009055(electron transfer activity);GO:0015035(protein disulfide oxidoreductase activity);GO:0022900(electron transport chain);GO:0045454(cell redox homeostasis);GO:0055114(oxidation-reduction process)	NA	K03676	NA
2	ENSDARG00000095007	sinhcafl	1.57275	0.924354	0.766768	0.25	0.161	2.40402e-21	6.66201e-17	SIN3-HDAC complex associated factor, like [Source:ZFIN;Acc:ZDB-GENE-031114-2]	GO:0003677(DNA binding)	NA	NA	NA
2	ENSDARG00000025350	prdx2	3.02205	2.36151	0.355819	0.379	0.47	2.49567e-21	6.916e-17	peroxiredoxin 2 [Source:ZFIN;Acc:ZDB-GENE-030326-2]	GO:0005829(cytosol);GO:0006979(response to oxidative stress);GO:0008379(thioredoxin peroxidase activity);GO:0016209(antioxidant activity);GO:0016491(oxidoreductase activity);GO:0019430(removal of superoxide radicals);GO:0042744(hydrogen peroxide catabolic process);GO:0045321(leukocyte activation);GO:0045454(cell redox homeostasis);GO:0051920(peroxiredoxin activity);GO:0055114(oxidation-reduction …	NA	K03386	EC:1.11.1.15
2	ENSDARG00000022399	ntmt1	1.17018	0.715153	0.710411	0.156	0.119	2.68512e-21	7.44101e-17	N-terminal Xaa-Pro-Lys N-methyltransferase 1 [Source:ZFIN;Acc:ZDB-GENE-040426-2055]	GO:0006480(N-terminal protein amino acid methylation);GO:0008168(methyltransferase activity)	NA	K16219	EC:2.1.1.244
2	ENSDARG00000068214	ccni	12.317	8.25122	0.577966	0.826	0.844	2.79733e-21	7.75197e-17	cyclin I [Source:ZFIN;Acc:ZDB-GENE-040426-2898]	GO:0000079(regulation of cyclin-dependent protein serine/threonine kinase activity);GO:0000278(mitotic cell cycle);GO:0000307(cyclin-dependent protein kinase holoenzyme complex);GO:0003674(molecular_function);GO:0004672(protein kinase activity);GO:0005575(cellular_component);GO:0005634(nucleus);GO:0005737(cytoplasm);GO:0006468(protein phosphorylation);GO:0007088(regulation of mitotic nuclear divi…	NA	NA	NA
2	ENSDARG00000007108	lipia	2.01152	0.995971	1.01411	0.268	0.113	3.6725e-21	1.01772e-16	lipase, member Ia [Source:ZFIN;Acc:ZDB-GENE-040801-242]	GO:0005576(extracellular region);GO:0006629(lipid metabolic process);GO:0016020(membrane);GO:0016042(lipid catabolic process);GO:0016787(hydrolase activity);GO:0052689(carboxylic ester hydrolase activity)	NA	K19404	EC:3.1.1.-
2	ENSDARG00000055900	zswim5	3.30048	1.83551	0.846491	0.388	0.295	3.98132e-21	1.1033e-16	zinc finger, SWIM-type containing 5 [Source:ZFIN;Acc:ZDB-GENE-030925-30]	GO:0031462(Cul2-RING ubiquitin ligase complex);GO:1902667(regulation of axon guidance)	NA	NA	NA
2	ENSDARG00000045373	pabpn1	1.84189	1.53231	0.265479	0.281	0.377	4.79657e-21	1.32923e-16	poly(A) binding protein, nuclear 1 [Source:ZFIN;Acc:ZDB-GENE-040426-2401]	GO:0003676(nucleic acid binding);GO:0003723(RNA binding);GO:1904247(positive regulation of polynucleotide adenylyltransferase activity)	03015(mRNA surveillance pathway)	K14396	NA
2	ENSDARG00000098591	tubb2b	2.45281	1.7436	0.492364	0.304	0.35	4.81354e-21	1.33393e-16	tubulin, beta 2b [Source:ZFIN;Acc:ZDB-GENE-030131-722]	GO:0000166(nucleotide binding);GO:0003924(GTPase activity);GO:0005200(structural constituent of cytoskeleton);GO:0005525(GTP binding);GO:0005737(cytoplasm);GO:0005856(cytoskeleton);GO:0005874(microtubule);GO:0007010(cytoskeleton organization);GO:0007017(microtubule-based process)	04145(Phagosome);04540(Gap junction)	K07375	NA
2	ENSDARG00000099624	chmp1b	4.10119	3.25613	0.332882	0.487	0.572	6.77266e-21	1.87684e-16	chromatin modifying protein 1B [Source:ZFIN;Acc:ZDB-GENE-030131-8370]	GO:0000815(ESCRT III complex);GO:0003674(molecular_function);GO:0005737(cytoplasm);GO:0005768(endosome);GO:0005771(multivesicular body);GO:0005829(cytosol);GO:0007034(vacuolar transport);GO:0015031(protein transport);GO:0016020(membrane);GO:0031902(late endosome membrane);GO:0032509(endosome transport via multivesicular body sorting pathway);GO:0045324(late endosome to vacuole transport)	04144(Endocytosis);04217(Necroptosis)	K12197	NA
2	ENSDARG00000020926	creb3l3l	2.26604	1.69845	0.415953	0.299	0.369	6.82762e-21	1.89207e-16	cAMP responsive element binding protein 3-like 3 like [Source:ZFIN;Acc:ZDB-GENE-040426-2942]	GO:0003700(DNA-binding transcription factor activity);GO:0006355(regulation of transcription, DNA-templated);GO:0030968(endoplasmic reticulum unfolded protein response);GO:0035497(cAMP response element binding);GO:0045944(positive regulation of transcription by RNA polymerase II)	04261(Adrenergic signaling in cardiomyocytes);04916(Melanogenesis)	K09048	NA
2	ENSDARG00000029431	si:ch211-147k10.5	1.8144	1.06228	0.772329	0.268	0.165	6.85851e-21	1.90063e-16	si:ch211-147k10.5 [Source:ZFIN;Acc:ZDB-GENE-120411-9]	GO:0031932(TORC2 complex);GO:0038203(TORC2 signaling)	NA	NA	NA
2	ENSDARG00000077383	anxa11a	6.13146	3.9507	0.634121	0.482	0.545	7.39845e-21	2.05026e-16	annexin A11a [Source:ZFIN;Acc:ZDB-GENE-030707-4]	GO:0005509(calcium ion binding);GO:0005515(protein binding);GO:0005544(calcium-dependent phospholipid binding);GO:0005737(cytoplasm);GO:0006909(phagocytosis);GO:0008429(phosphatidylethanolamine binding);GO:0032506(cytokinetic process);GO:0044548(S100 protein binding);GO:0048306(calcium-dependent protein binding);GO:0051592(response to calcium ion)	NA	K17095	NA
2	ENSDARG00000043484	ube2d2	3.38201	2.66486	0.343824	0.446	0.538	7.63892e-21	2.1169e-16	ubiquitin-conjugating enzyme E2D 2 (UBC4/5 homolog, yeast) [Source:ZFIN;Acc:ZDB-GENE-120312-1]	GO:0000151(ubiquitin ligase complex);GO:0000166(nucleotide binding);GO:0005524(ATP binding);GO:0005575(cellular_component);GO:0006511(ubiquitin-dependent protein catabolic process);GO:0016567(protein ubiquitination);GO:0016740(transferase activity);GO:0031625(ubiquitin protein ligase binding);GO:0045879(negative regulation of smoothened signaling pathway);GO:0061631(ubiquitin conjugating enzyme a…	04120(Ubiquitin mediated proteolysis);04141(Protein processing in endoplasmic reticulum)	K06689	EC:2.3.2.23
2	ENSDARG00000068708	ifrd1	2.80651	2.05864	0.447086	0.357	0.436	8.68253e-21	2.4061e-16	interferon-related developmental regulator 1 [Source:ZFIN;Acc:ZDB-GENE-030131-6132]	GO:0005575(cellular_component);GO:0005634(nucleus);GO:0008150(biological_process)	NA	NA	NA
2	ENSDARG00000087647	sept7a	1.77628	1.24868	0.508456	0.232	0.264	1.11529e-20	3.0907e-16	septin 7a [Source:ZFIN;Acc:ZDB-GENE-040426-1008]	GO:0000166(nucleotide binding);GO:0003924(GTPase activity);GO:0005525(GTP binding);GO:0005940(septin ring);GO:0015630(microtubule cytoskeleton);GO:0031105(septin complex);GO:0032947(protein-containing complex scaffold activity);GO:0060271(cilium assembly);GO:0061640(cytoskeleton-dependent cytokinesis)	NA	NA	NA
2	ENSDARG00000061566	slc7a3b	2.4828	1.60852	0.626236	0.33	0.302	1.36224e-20	3.77504e-16	solute carrier family 7 (cationic amino acid transporter, y+ system), member 3b [Source:ZFIN;Acc:ZDB-GENE-120813-6]	GO:0000064(L-ornithine transmembrane transporter activity);GO:0006865(amino acid transport);GO:0015181(arginine transmembrane transporter activity);GO:0015189(L-lysine transmembrane transporter activity);GO:0016020(membrane);GO:0016021(integral component of membrane);GO:0022857(transmembrane transporter activity);GO:0055085(transmembrane transport);GO:0097638(L-arginine import across plasma membr…	NA	NA	NA
2	ENSDARG00000098312	scarb2a	3.32396	1.90894	0.800129	0.393	0.318	1.80006e-20	4.98833e-16	scavenger receptor class B, member 2a [Source:ZFIN;Acc:ZDB-GENE-020419-29]	GO:0005044(scavenger receptor activity);GO:0005764(lysosome);GO:0006898(receptor-mediated endocytosis);GO:0016020(membrane);GO:0016021(integral component of membrane);GO:0030903(notochord development)	04142(Lysosome)	K12384	NA
2	ENSDARG00000068434	h3f3b.1.2	2.76004	2.15885	0.354424	0.379	0.47	2.19498e-20	6.08273e-16	H3 histone, family 3B.1 [Source:ZFIN;Acc:ZDB-GENE-050417-65]	GO:0000786(nucleosome);GO:0003677(DNA binding);GO:0005634(nucleus);GO:0005694(chromosome);GO:0031492(nucleosomal DNA binding);GO:0046982(protein heterodimerization activity)	NA	K11253	NA
2	ENSDARG00000051857	tes	1.55644	0.924344	0.751746	0.219	0.155	2.21744e-20	6.14496e-16	testis derived transcript (3 LIM domains) [Source:ZFIN;Acc:ZDB-GENE-040718-59]	GO:0008270(zinc ion binding);GO:0042127(regulation of cell population proliferation);GO:0046872(metal ion binding)	NA	NA	NA
2	ENSDARG00000034187	calm1b	6.57303	4.2658	0.623742	0.643	0.618	2.29038e-20	6.34711e-16	calmodulin 1b [Source:ZFIN;Acc:ZDB-GENE-030804-2]	GO:0005509(calcium ion binding);GO:0019722(calcium-mediated signaling);GO:0046872(metal ion binding)	04020(Calcium signaling pathway);04070(Phosphatidylinositol signaling system);04114(Oocyte meiosis);04218(Cellular senescence);04261(Adrenergic signaling in cardiomyocytes);04270(Vascular smooth muscle contraction);04371(Apelin signaling pathway);04625(C-type lectin receptor signaling pathway);04744(Phototransduction);04910(Insulin signaling pathway);04912(GnRH signaling pathway);04916(Melanogene…	K02183	NA
2	ENSDARG00000077264	wdr43	1.53465	1.12413	0.449103	0.214	0.253	2.50533e-20	6.94276e-16	WD repeat domain 43 [Source:ZFIN;Acc:ZDB-GENE-021231-3]	GO:0001525(angiogenesis);GO:0001570(vasculogenesis);GO:0005515(protein binding);GO:0042254(ribosome biogenesis);GO:0048703(embryonic viscerocranium morphogenesis);GO:0060218(hematopoietic stem cell differentiation)	03008(Ribosome biogenesis in eukaryotes)	K14546	NA
2	ENSDARG00000036257	rasal2	1.53714	0.991616	0.632399	0.214	0.192	2.71451e-20	7.52244e-16	RAS protein activator like 2 [Source:ZFIN;Acc:ZDB-GENE-070912-180]	GO:0005096(GTPase activator activity);GO:0007165(signal transduction);GO:0043087(regulation of GTPase activity);GO:0043547(positive regulation of GTPase activity)	NA	NA	NA
2	ENSDARG00000071403	oaz1a	5.15878	4.28021	0.269348	0.567	0.704	2.83813e-20	7.86501e-16	ornithine decarboxylase antizyme 1a [Source:ZFIN;Acc:ZDB-GENE-020731-4]	GO:0005634(nucleus);GO:0005737(cytoplasm);GO:0005829(cytosol);GO:0006595(polyamine metabolic process);GO:0006596(polyamine biosynthetic process);GO:0008073(ornithine decarboxylase inhibitor activity);GO:0043086(negative regulation of catalytic activity);GO:0045732(positive regulation of protein catabolic process);GO:0090316(positive regulation of intracellular protein transport)	NA	K16548	NA
2	ENSDARG00000040623	fosl2	8.96575	5.70652	0.651812	0.683	0.682	3.07101e-20	8.51039e-16	fos-like antigen 2 [Source:ZFIN;Acc:ZDB-GENE-070209-164]	GO:0000978(RNA polymerase II proximal promoter sequence-specific DNA binding);GO:0003677(DNA binding);GO:0003700(DNA-binding transcription factor activity);GO:0005634(nucleus);GO:0006355(regulation of transcription, DNA-templated);GO:0006357(regulation of transcription by RNA polymerase II);GO:2000690(regulation of cardiac muscle cell myoblast differentiation)	NA	K09030	NA
2	ENSDARG00000040284	si:dkey-79d12.5	4.16638	2.61949	0.669509	0.496	0.459	3.15813e-20	8.75182e-16	si:dkey-79d12.5 [Source:ZFIN;Acc:ZDB-GENE-131127-429]	GO:0005634(nucleus);GO:0005737(cytoplasm);GO:0008285(negative regulation of cell population proliferation);GO:0045930(negative regulation of mitotic cell cycle)	03018(RNA degradation)	K14443	NA
2	ENSDARG00000036785	si:ch211-226m16.2	5.98124	3.5546	0.750759	0.594	0.523	3.54998e-20	9.8377e-16	si:ch211-226m16.2 [Source:ZFIN;Acc:ZDB-GENE-030131-2302]	GO:0004568(chitinase activity);GO:0005576(extracellular region);GO:0005615(extracellular space);GO:0005737(cytoplasm);GO:0005975(carbohydrate metabolic process);GO:0006032(chitin catabolic process);GO:0008061(chitin binding);GO:0045766(positive regulation of angiogenesis)	NA	NA	NA
2	ENSDARG00000103163	tomm20a	1.98465	1.23749	0.681475	0.272	0.245	4.04528e-20	1.12103e-15	translocase of outer mitochondrial membrane 20 [Source:ZFIN;Acc:ZDB-GENE-040426-1976]	GO:0005634(nucleus);GO:0005739(mitochondrion);GO:0005741(mitochondrial outer membrane);GO:0005742(mitochondrial outer membrane translocase complex);GO:0006357(regulation of transcription by RNA polymerase II);GO:0006605(protein targeting);GO:0006886(intracellular protein transport);GO:0016020(membrane);GO:0016021(integral component of membrane);GO:0044212(transcription regulatory region DNA bindi…	NA	K17770	NA
2	ENSDARG00000061124	srpra	3.04313	2.03739	0.578837	0.406	0.399	4.73412e-20	1.31192e-15	SRP receptor subunit alpha [Source:ZFIN;Acc:ZDB-GENE-030219-11]	GO:0003924(GTPase activity);GO:0005047(signal recognition particle binding);GO:0005525(GTP binding);GO:0005785(signal recognition particle receptor complex);GO:0005789(endoplasmic reticulum membrane);GO:0006605(protein targeting);GO:0006614(SRP-dependent cotranslational protein targeting to membrane);GO:0006886(intracellular protein transport);GO:0016020(membrane);GO:0045047(protein targeting to …	03060(Protein export)	K13431	NA
2	ENSDARG00000009881	ier5	5.23654	3.8615	0.439452	0.558	0.616	4.77513e-20	1.32329e-15	immediate early response 5 [Source:ZFIN;Acc:ZDB-GENE-030616-127]	GO:0003674(molecular_function);GO:0005575(cellular_component);GO:0008150(biological_process)	NA	NA	NA
2	ENSDARG00000097055	si:ch211-284f22.3	1.66833	0.911909	0.87144	0.237	0.112	6.17603e-20	1.7115e-15	si:ch211-284f22.3 [Source:ZFIN;Acc:ZDB-GENE-060526-166]	GO:0000813(ESCRT I complex);GO:0006612(protein targeting to membrane);GO:0006623(protein targeting to vacuole);GO:0015031(protein transport);GO:0032509(endosome transport via multivesicular body sorting pathway);GO:0043162(ubiquitin-dependent protein catabolic process via the multivesicular body sorting pathway);GO:0043231(intracellular membrane-bounded organelle)	04144(Endocytosis)	K12185	NA
2	ENSDARG00000017037	ikbkg	1.76363	1.19814	0.557752	0.25	0.248	6.62518e-20	1.83597e-15	inhibitor of kappa light polypeptide gene enhancer in B-cells, kinase gamma [Source:ZFIN;Acc:ZDB-GENE-050327-68]	GO:0005634(nucleus);GO:0005737(cytoplasm);GO:0007252(I-kappaB phosphorylation);GO:0043123(positive regulation of I-kappaB kinase/NF-kappaB signaling);GO:0070530(K63-linked polyubiquitin modification-dependent protein binding)	04010(MAPK signaling pathway);04210(Apoptosis);04620(Toll-like receptor signaling pathway);04621(NOD-like receptor signaling pathway);04622(RIG-I-like receptor signaling pathway);04623(Cytosolic DNA-sensing pathway);04625(C-type lectin receptor signaling pathway);04920(Adipocytokine signaling pathway);05168(Herpes simplex virus 1 infection)	K07210	NA
2	ENSDARG00000059001	pim2	6.56973	3.93379	0.739915	0.567	0.505	6.92527e-20	1.91913e-15	Pim-2 proto-oncogene, serine/threonine kinase [Source:ZFIN;Acc:ZDB-GENE-000831-6]	GO:0000166(nucleotide binding);GO:0004672(protein kinase activity);GO:0004674(protein serine/threonine kinase activity);GO:0005524(ATP binding);GO:0005737(cytoplasm);GO:0006468(protein phosphorylation);GO:0016301(kinase activity);GO:0016310(phosphorylation);GO:0016740(transferase activity);GO:0043066(negative regulation of apoptotic process)	04933(AGE-RAGE signaling pathway in diabetic complications)	K04702	EC:2.7.11.1
2	ENSDARG00000077473	mych	4.89826	2.42701	1.01309	0.446	0.333	7.17364e-20	1.98796e-15	myelocytomatosis oncogene homolog [Source:ZFIN;Acc:ZDB-GENE-030219-51]	GO:0003677(DNA binding);GO:0003700(DNA-binding transcription factor activity);GO:0005634(nucleus);GO:0006355(regulation of transcription, DNA-templated);GO:0014032(neural crest cell development);GO:0046983(protein dimerization activity)	NA	NA	NA
2	ENSDARG00000055713	fmnl1a	6.72635	4.28626	0.650103	0.562	0.578	7.95667e-20	2.20495e-15	formin-like 1a [Source:ZFIN;Acc:ZDB-GENE-120215-83]	GO:0003779(actin binding);GO:0007010(cytoskeleton organization);GO:0008360(regulation of cell shape);GO:0016043(cellular component organization);GO:0017048(Rho GTPase binding);GO:0030036(actin cytoskeleton organization)	NA	NA	NA
2	ENSDARG00000044852	wbp2nl	3.00777	2.14022	0.490935	0.402	0.413	9.05498e-20	2.50931e-15	WBP2 N-terminal like [Source:ZFIN;Acc:ZDB-GENE-030131-4012]	GO:0003713(transcription coactivator activity);GO:0005634(nucleus);GO:0007343(egg activation);GO:0031490(chromatin DNA binding);GO:0033011(perinuclear theca);GO:0035038(female pronucleus assembly);GO:0035039(male pronucleus assembly);GO:0050699(WW domain binding);GO:1903508(positive regulation of nucleic acid-templated transcription)	NA	K22532	NA
2	ENSDARG00000054191	pgk1	3.1758	2.36127	0.427557	0.411	0.468	9.23941e-20	2.56043e-15	phosphoglycerate kinase 1 [Source:ZFIN;Acc:ZDB-GENE-040426-2711]	GO:0001666(response to hypoxia);GO:0004618(phosphoglycerate kinase activity);GO:0005524(ATP binding);GO:0005829(cytosol);GO:0006094(gluconeogenesis);GO:0006096(glycolytic process);GO:0016301(kinase activity);GO:0016310(phosphorylation);GO:0016740(transferase activity);GO:0043531(ADP binding);GO:1903862(positive regulation of oxidative phosphorylation)	00010(Glycolysis / Gluconeogenesis)	K00927	EC:2.7.2.3
2	ENSDARG00000095939	si:ch73-226l13.2	2.14784	0.929385	1.20854	0.237	0.072	1.01891e-19	2.82361e-15	si:ch73-226l13.2 [Source:ZFIN;Acc:ZDB-GENE-110411-18]	GO:0005125(cytokine activity);GO:0005576(extracellular region);GO:0005615(extracellular space);GO:0006954(inflammatory response);GO:0006955(immune response);GO:0010469(regulation of signaling receptor activity)	NA	NA	NA
2	ENSDARG00000074758	csde1	1.8973	1.53614	0.304638	0.272	0.354	1.07165e-19	2.96975e-15	cold shock domain containing E1, RNA-binding [Source:ZFIN;Acc:ZDB-GENE-030131-8623]	GO:0003676(nucleic acid binding)	NA	NA	NA
2	ENSDARG00000044039	stx11a	2.6397	1.45035	0.863973	0.33	0.245	1.18067e-19	3.27187e-15	syntaxin 11a [Source:ZFIN;Acc:ZDB-GENE-040426-2564]	GO:0000149(SNARE binding);GO:0005484(SNAP receptor activity);GO:0005794(Golgi apparatus);GO:0005886(plasma membrane);GO:0006886(intracellular protein transport);GO:0006887(exocytosis);GO:0006906(vesicle fusion);GO:0008021(synaptic vesicle);GO:0012505(endomembrane system);GO:0016020(membrane);GO:0016021(integral component of membrane);GO:0016192(vesicle-mediated transport);GO:0031201(SNARE complex…	04130(SNARE interactions in vesicular transport)	K08487	NA
2	ENSDARG00000099175	hmgb1a	3.80783	2.8165	0.435062	0.415	0.512	1.32231e-19	3.66439e-15	high mobility group box 1a [Source:ZFIN;Acc:ZDB-GENE-030131-341]	GO:0000790(nuclear chromatin);GO:0002218(activation of innate immune response);GO:0003677(DNA binding);GO:0005634(nucleus);GO:0005737(cytoplasm);GO:0005886(plasma membrane);GO:0006310(DNA recombination);GO:0006338(chromatin remodeling);GO:0006357(regulation of transcription by RNA polymerase II);GO:0008134(transcription factor binding);GO:0008301(DNA binding, bending);GO:0009409(response to cold)…	03410(Base excision repair);04140(Autophagy - animal);04217(Necroptosis)	K10802	NA
2	ENSDARG00000038076	romo1	6.25958	4.70605	0.41155	0.607	0.703	1.3986e-19	3.87579e-15	reactive oxygen species modulator 1 [Source:ZFIN;Acc:ZDB-GENE-040426-1768]	GO:0001302(replicative cell aging);GO:0003674(molecular_function);GO:0005739(mitochondrion);GO:0005743(mitochondrial inner membrane);GO:0005744(TIM23 mitochondrial import inner membrane translocase complex);GO:0008284(positive regulation of cell population proliferation);GO:0016020(membrane);GO:0016021(integral component of membrane);GO:0030150(protein import into mitochondrial matrix);GO:0034614…	NA	NA	NA
2	ENSDARG00000090454	gnb1a	5.15904	3.70209	0.478761	0.576	0.619	1.49759e-19	4.15013e-15	guanine nucleotide binding protein (G protein), beta polypeptide 1a [Source:ZFIN;Acc:ZDB-GENE-030131-823]	GO:0005515(protein binding);GO:0007165(signal transduction);GO:0048920(posterior lateral line neuromast primordium migration);GO:1902624(positive regulation of neutrophil migration)	04371(Apelin signaling pathway);04744(Phototransduction)	K04536	NA
2	ENSDARG00000086173	relb	5.43932	3.56463	0.609674	0.571	0.549	1.50915e-19	4.18216e-15	v-rel avian reticuloendotheliosis viral oncogene homolog B [Source:ZFIN;Acc:ZDB-GENE-030131-9531]	GO:0000122(negative regulation of transcription by RNA polymerase II);GO:0000977(RNA polymerase II regulatory region sequence-specific DNA binding);GO:0000981(DNA-binding transcription factor activity, RNA polymerase II-specific);GO:0003677(DNA binding);GO:0003682(chromatin binding);GO:0003700(DNA-binding transcription factor activity);GO:0005634(nucleus);GO:0005654(nucleoplasm);GO:0005737(cytopl…	04010(MAPK signaling pathway);04625(C-type lectin receptor signaling pathway)	K09253	NA
2	ENSDARG00000056075	rca2.1	1.82604	1.32338	0.464495	0.277	0.29	1.51391e-19	4.19534e-15	regulator of complement activation group 2 gene 1 [Source:ZFIN;Acc:ZDB-GENE-050320-60]	GO:0016020(membrane);GO:0016021(integral component of membrane)	NA	NA	NA
2	ENSDARG00000070669	cxcr3.3	2.42894	1.13737	1.09462	0.272	0.14	2.01417e-19	5.58168e-15	chemokine (C-X-C motif) receptor 3, tandem duplicate 3 [Source:ZFIN;Acc:ZDB-GENE-100922-34]	GO:0002685(regulation of leukocyte migration);GO:0004930(G protein-coupled receptor activity);GO:0006935(chemotaxis);GO:0006954(inflammatory response);GO:0006955(immune response);GO:0007186(G protein-coupled receptor signaling pathway);GO:0007204(positive regulation of cytosolic calcium ion concentration);GO:0009897(external side of plasma membrane);GO:0016020(membrane);GO:0016021(integral compon…	NA	NA	NA
2	ENSDARG00000061547	hist1h4l.10	2.02693	1.48817	0.445757	0.268	0.315	2.02687e-19	5.61685e-15	histone 1, H4, like [Source:ZFIN;Acc:ZDB-GENE-070927-10]	GO:0000786(nucleosome);GO:0003677(DNA binding);GO:0005634(nucleus);GO:0005694(chromosome);GO:0006352(DNA-templated transcription, initiation);GO:0046982(protein heterodimerization activity)	NA	K11254	NA
2	ENSDARG00000039969	akirin1	0.914409	0.747907	0.289982	0.138	0.192	2.04108e-19	5.65624e-15	akirin 1 [Source:ZFIN;Acc:ZDB-GENE-040426-2178]	GO:0003674(molecular_function);GO:0005575(cellular_component);GO:0008150(biological_process)	NA	NA	NA
2	ENSDARG00000062315	sik2b	2.69894	1.6981	0.668473	0.312	0.322	2.2977e-19	6.36739e-15	salt-inducible kinase 2b [Source:ZFIN;Acc:ZDB-GENE-071012-1]	GO:0004672(protein kinase activity);GO:0004674(protein serine/threonine kinase activity);GO:0005524(ATP binding);GO:0005634(nucleus);GO:0005737(cytoplasm);GO:0006468(protein phosphorylation);GO:0031588(nucleotide-activated protein kinase complex);GO:0032007(negative regulation of TOR signaling);GO:0035556(intracellular signal transduction);GO:0042149(cellular response to glucose starvation)	NA	K16311	EC:2.7.11.1
2	ENSDARG00000003527	mak16	1.45952	0.955073	0.611812	0.205	0.184	2.43755e-19	6.75494e-15	MAK16 homolog (S. cerevisiae) [Source:ZFIN;Acc:ZDB-GENE-020419-35]	GO:0005634(nucleus);GO:0005730(nucleolus)	NA	K14831	NA
2	ENSDARG00000006260	tuba8l4	6.31633	4.65569	0.440091	0.576	0.657	2.7154e-19	7.52491e-15	tubulin, alpha 8 like 4 [Source:ZFIN;Acc:ZDB-GENE-040426-860]	GO:0000166(nucleotide binding);GO:0000226(microtubule cytoskeleton organization);GO:0000278(mitotic cell cycle);GO:0003924(GTPase activity);GO:0005200(structural constituent of cytoskeleton);GO:0005525(GTP binding);GO:0005737(cytoplasm);GO:0005856(cytoskeleton);GO:0005874(microtubule);GO:0007017(microtubule-based process)	04145(Phagosome);04210(Apoptosis);04530(Tight junction);04540(Gap junction)	K07374	NA
2	ENSDARG00000093214	si:ch211-284e13.9	1.82315	1.30054	0.487316	0.272	0.261	3.03406e-19	8.40798e-15	si:ch211-284e13.9 [Source:ZFIN;Acc:ZDB-GENE-060526-164]	GO:0000151(ubiquitin ligase complex);GO:0000209(protein polyubiquitination);GO:0004842(ubiquitin-protein transferase activity);GO:0005737(cytoplasm);GO:0006511(ubiquitin-dependent protein catabolic process);GO:0016567(protein ubiquitination);GO:0016740(transferase activity);GO:0031624(ubiquitin conjugating enzyme binding);GO:0032436(positive regulation of proteasomal ubiquitin-dependent protein c…	NA	NA	NA
2	ENSDARG00000008867	rap1b	3.60926	2.82335	0.354295	0.442	0.52	3.50603e-19	9.71592e-15	RAP1B, member of RAS oncogene family [Source:ZFIN;Acc:ZDB-GENE-030131-9662]	GO:0000165(MAPK cascade);GO:0000166(nucleotide binding);GO:0000187(activation of MAPK activity);GO:0001756(somitogenesis);GO:0003428(chondrocyte intercalation involved in growth plate cartilage morphogenesis);GO:0003924(GTPase activity);GO:0004708(MAP kinase kinase activity);GO:0005525(GTP binding);GO:0005737(cytoplasm);GO:0005829(cytosol);GO:0005886(plasma membrane);GO:0005911(cell-cell junction…	04010(MAPK signaling pathway);04510(Focal adhesion)	K07836	NA
2	ENSDARG00000093313	ubb	3.78208	2.73067	0.469925	0.451	0.486	4.07865e-19	1.13028e-14	ubiquitin B [Source:ZFIN;Acc:ZDB-GENE-050411-10]	GO:0003674(molecular_function);GO:0005515(protein binding);GO:0005634(nucleus);GO:0005737(cytoplasm);GO:0016567(protein ubiquitination);GO:0019941(modification-dependent protein catabolic process);GO:0031386(protein tag);GO:0031625(ubiquitin protein ligase binding)	03320(PPAR signaling pathway)	K08770	NA
2	ENSDARG00000101626	arf6a	2.25532	1.52684	0.56278	0.299	0.31	4.15064e-19	1.15022e-14	ADP-ribosylation factor 6a [Source:ZFIN;Acc:ZDB-GENE-030131-8007]	GO:0000166(nucleotide binding);GO:0001726(ruffle);GO:0005525(GTP binding);GO:0005737(cytoplasm);GO:0005768(endosome);GO:0006886(intracellular protein transport);GO:0016192(vesicle-mediated transport);GO:0030139(endocytic vesicle);GO:0035622(intrahepatic bile duct development);GO:0036010(protein localization to endosome);GO:0055038(recycling endosome membrane);GO:0055113(epiboly involved in gastru…	04144(Endocytosis)	K07941	NA
2	ENSDARG00000109289	mrps15	2.56054	1.66774	0.618555	0.344	0.308	4.48122e-19	1.24183e-14	mitochondrial ribosomal protein S15 [Source:ZFIN;Acc:ZDB-GENE-040718-188]	GO:0003735(structural constituent of ribosome);GO:0005622(intracellular);GO:0005739(mitochondrion);GO:0005763(mitochondrial small ribosomal subunit);GO:0005840(ribosome);GO:0006412(translation)	03010(Ribosome)	K02956	NA
2	ENSDARG00000015206	hnrnpua	1.43126	1.01109	0.501377	0.201	0.223	4.65589e-19	1.29024e-14	heterogeneous nuclear ribonucleoprotein Ua [Source:ZFIN;Acc:ZDB-GENE-030131-3731]	GO:0005515(protein binding);GO:0005634(nucleus)	03040(Spliceosome)	K12888	NA
2	ENSDARG00000017741	g3bp1	2.01767	1.6156	0.320616	0.308	0.369	4.9508e-19	1.37197e-14	GTPase activating protein (SH3 domain) binding protein 1 [Source:ZFIN;Acc:ZDB-GENE-030131-7452]	GO:0003676(nucleic acid binding);GO:0003723(RNA binding);GO:0003729(mRNA binding);GO:0005829(cytosol);GO:1990904(ribonucleoprotein complex)	NA	K17265	3.6.4.13;EC:3.6.4.12
2	ENSDARG00000036482	hexim1	2.19555	1.68842	0.378908	0.308	0.379	6.19065e-19	1.71555e-14	HEXIM P-TEFb complex subunit 1 [Source:ZFIN;Acc:ZDB-GENE-030131-4637]	GO:0000122(negative regulation of transcription by RNA polymerase II);GO:0004861(cyclin-dependent protein serine/threonine kinase inhibitor activity);GO:0005634(nucleus);GO:0005737(cytoplasm);GO:0017069(snRNA binding);GO:0045736(negative regulation of cyclin-dependent protein serine/threonine kinase activity)	NA	K15189	NA
2	ENSDARG00000092115	eif4a1a	7.723	5.69733	0.438875	0.656	0.724	8.95462e-19	2.4815e-14	eukaryotic translation initiation factor 4A1A [Source:ZFIN;Acc:ZDB-GENE-031030-2]	GO:0003676(nucleic acid binding);GO:0003743(translation initiation factor activity);GO:0004004(ATP-dependent RNA helicase activity);GO:0005524(ATP binding);GO:0006413(translational initiation)	03013(RNA transport)	K03257	NA
2	ENSDARG00000070161	vamp3	1.31917	1.02721	0.360904	0.183	0.25	1.04207e-18	2.88778e-14	vesicle-associated membrane protein 3 (cellubrevin) [Source:ZFIN;Acc:ZDB-GENE-040625-45]	GO:0016020(membrane);GO:0016021(integral component of membrane);GO:0016192(vesicle-mediated transport)	04130(SNARE interactions in vesicular transport);04145(Phagosome)	K13505	NA
2	ENSDARG00000001470	mhc1zea	1.29655	0.964233	0.427219	0.192	0.206	1.0492e-18	2.90754e-14	major histocompatibility complex class I ZEA [Source:ZFIN;Acc:ZDB-GENE-070705-176]	GO:0005615(extracellular space);GO:0005886(plasma membrane);GO:0006955(immune response);GO:0009897(external side of plasma membrane);GO:0016020(membrane);GO:0016021(integral component of membrane)	NA	NA	NA
2	ENSDARG00000007863	tra2a	1.7538	1.43706	0.287357	0.25	0.339	1.12346e-18	3.11332e-14	transformer 2 alpha homolog [Source:ZFIN;Acc:ZDB-GENE-040426-1391]	GO:0003676(nucleic acid binding);GO:0003723(RNA binding);GO:0048026(positive regulation of mRNA splicing, via spliceosome);GO:1990904(ribonucleoprotein complex)	03040(Spliceosome)	K12897	NA
2	ENSDARG00000043475	TAGAP	5.9688	4.40093	0.439633	0.536	0.612	1.47948e-18	4.09994e-14	si:ch211-122h15.4 [Source:ZFIN;Acc:ZDB-GENE-121214-340]	GO:0005096(GTPase activator activity);GO:0007165(signal transduction);GO:0043547(positive regulation of GTPase activity)	NA	K20654	NA
2	ENSDARG00000035559	tp53	1.55382	1.26863	0.292543	0.228	0.311	1.48112e-18	4.10447e-14	tumor protein p53 [Source:ZFIN;Acc:ZDB-GENE-990415-270]	GO:0000077(DNA damage checkpoint);GO:0000785(chromatin);GO:0003677(DNA binding);GO:0003700(DNA-binding transcription factor activity);GO:0005515(protein binding);GO:0005634(nucleus);GO:0005737(cytoplasm);GO:0006355(regulation of transcription, DNA-templated);GO:0006357(regulation of transcription by RNA polymerase II);GO:0006914(autophagy);GO:0006915(apoptotic process);GO:0006974(cellular respons…	04010(MAPK signaling pathway);04110(Cell cycle);04115(p53 signaling pathway);04137(Mitophagy - animal);04210(Apoptosis);04216(Ferroptosis);04218(Cellular senescence);04310(Wnt signaling pathway);05168(Herpes simplex virus 1 infection)	K04451	NA
2	ENSDARG00000075327	dock10	2.18448	1.49087	0.551134	0.299	0.281	1.56123e-18	4.32649e-14	dedicator of cytokinesis 10 [Source:ZFIN;Acc:ZDB-GENE-130530-773]	GO:0005085(guanyl-nucleotide exchange factor activity);GO:0007264(small GTPase mediated signal transduction)	NA	K21853	NA
2	ENSDARG00000020573	ddx3xa	4.44166	3.11242	0.513061	0.491	0.556	1.90372e-18	5.2756e-14	DEAD-box helicase 3 X-linked a [Source:ZFIN;Acc:ZDB-GENE-030131-1565]	GO:0000166(nucleotide binding);GO:0003676(nucleic acid binding);GO:0004386(helicase activity);GO:0005524(ATP binding);GO:0016787(hydrolase activity)	04622(RIG-I-like receptor signaling pathway)	K11594	EC:3.6.4.13
2	ENSDARG00000039931	slc25a33	2.38977	1.58089	0.59613	0.317	0.317	2.24213e-18	6.2134e-14	solute carrier family 25 (pyrimidine nucleotide carrier), member 33 [Source:ZFIN;Acc:ZDB-GENE-040426-2183]	GO:0005739(mitochondrion);GO:0005743(mitochondrial inner membrane);GO:0015218(pyrimidine nucleotide transmembrane transporter activity);GO:0016020(membrane);GO:0016021(integral component of membrane);GO:0022857(transmembrane transporter activity);GO:0055085(transmembrane transport);GO:1990519(pyrimidine nucleotide import into mitochondrion)	NA	K15116	NA
2	ENSDARG00000029818	srsf5a	3.33451	2.63556	0.339365	0.42	0.493	2.27513e-18	6.30484e-14	serine and arginine rich splicing factor 5a [Source:ZFIN;Acc:ZDB-GENE-030131-7336]	GO:0003676(nucleic acid binding);GO:0003723(RNA binding);GO:0005575(cellular_component);GO:0008150(biological_process)	03040(Spliceosome);05168(Herpes simplex virus 1 infection)	K12893	NA
2	ENSDARG00000040158	cdc42l	6.57429	5.40917	0.281428	0.661	0.774	2.28287e-18	6.32628e-14	cell division cycle 42, like [Source:ZFIN;Acc:ZDB-GENE-030131-6069]	GO:0000166(nucleotide binding);GO:0003924(GTPase activity);GO:0005525(GTP binding);GO:0005622(intracellular);GO:0005737(cytoplasm);GO:0005886(plasma membrane);GO:0005938(cell cortex);GO:0006897(endocytosis);GO:0007015(actin filament organization);GO:0007163(establishment or maintenance of cell polarity);GO:0007264(small GTPase mediated signal transduction);GO:0007266(Rho protein signal transducti…	04010(MAPK signaling pathway);04144(Endocytosis);04370(VEGF signaling pathway);04510(Focal adhesion);04520(Adherens junction);04530(Tight junction);04810(Regulation of actin cytoskeleton);04912(GnRH signaling pathway);04933(AGE-RAGE signaling pathway in diabetic complications);05132(Salmonella infection)	K04393	NA
2	ENSDARG00000056252	sort1b	2.68965	1.59443	0.754377	0.335	0.26	2.29393e-18	6.35695e-14	sortilin 1b [Source:ZFIN;Acc:ZDB-GENE-030131-7447]	GO:0005515(protein binding);GO:0005794(Golgi apparatus);GO:0016020(membrane);GO:0016021(integral component of membrane);GO:0071466(cellular response to xenobiotic stimulus)	04142(Lysosome)	K12388	NA
2	ENSDARG00000019362	ptbp1a	1.80158	1.47484	0.288701	0.25	0.35	2.38684e-18	6.6144e-14	polypyrimidine tract binding protein 1a [Source:ZFIN;Acc:ZDB-GENE-050522-492]	GO:0003676(nucleic acid binding);GO:0003723(RNA binding);GO:0005634(nucleus);GO:0006397(mRNA processing);GO:0009953(dorsal/ventral pattern formation);GO:0045595(regulation of cell differentiation);GO:0045746(negative regulation of Notch signaling pathway);GO:0060472(positive regulation of cortical granule exocytosis by positive regulation of cytosolic calcium ion concentration);GO:0060729(intesti…	NA	K13218	NA
2	ENSDARG00000097993	si:ch211-191c10.1	4.74043	2.72477	0.79888	0.504	0.385	2.47476e-18	6.85805e-14	si:ch211-191c10.1 [Source:ZFIN;Acc:ZDB-GENE-131127-387]	GO:0005509(calcium ion binding)	NA	NA	NA
2	ENSDARG00000099745	baz1a.1	2.19233	1.7279	0.343443	0.304	0.377	2.58178e-18	7.15462e-14	bromodomain adjacent to zinc finger domain, 1A [Source:ZFIN;Acc:ZDB-GENE-030131-6105]	GO:0005634(nucleus);GO:0008150(biological_process);GO:0046872(metal ion binding)	NA	K11655	NA
2	ENSDARG00000021975	ginm1	1.97184	1.33688	0.560673	0.272	0.266	2.60217e-18	7.21114e-14	glycoprotein integral membrane 1 [Source:ZFIN;Acc:ZDB-GENE-030131-5900]	GO:0016020(membrane);GO:0016021(integral component of membrane)	NA	NA	NA
2	ENSDARG00000019160	sh3bp5la	4.04548	2.46516	0.714629	0.451	0.385	2.63415e-18	7.29976e-14	SH3-binding domain protein 5-like, a [Source:ZFIN;Acc:ZDB-GENE-040426-2187]	GO:0004860(protein kinase inhibitor activity);GO:0005737(cytoplasm);GO:0035556(intracellular signal transduction);GO:0061099(negative regulation of protein tyrosine kinase activity)	NA	NA	NA
2	ENSDARG00000094673	rhoab	9.76032	7.1704	0.444876	0.759	0.803	2.85002e-18	7.89799e-14	ras homolog gene family, member Ab [Source:ZFIN;Acc:ZDB-GENE-040322-2]	GO:0000166(nucleotide binding);GO:0003924(GTPase activity);GO:0005525(GTP binding);GO:0005622(intracellular);GO:0005737(cytoplasm);GO:0005886(plasma membrane);GO:0005938(cell cortex);GO:0007015(actin filament organization);GO:0007264(small GTPase mediated signal transduction);GO:0007266(Rho protein signal transduction);GO:0008360(regulation of cell shape);GO:0016020(membrane);GO:0016055(Wnt signa…	04144(Endocytosis);04150(mTOR signaling pathway);04270(Vascular smooth muscle contraction);04310(Wnt signaling pathway);04350(TGF-beta signaling pathway);04510(Focal adhesion);04520(Adherens junction);04530(Tight junction);04621(NOD-like receptor signaling pathway);04625(C-type lectin receptor signaling pathway);04810(Regulation of actin cytoskeleton)	K04513	NA
2	ENSDARG00000044619	birc2	4.29724	2.98598	0.525208	0.496	0.498	2.93089e-18	8.12209e-14	baculoviral IAP repeat containing 2 [Source:ZFIN;Acc:ZDB-GENE-030825-6]	GO:0005634(nucleus);GO:0005737(cytoplasm);GO:0006915(apoptotic process);GO:0016567(protein ubiquitination);GO:0042981(regulation of apoptotic process);GO:0043027(cysteine-type endopeptidase inhibitor activity involved in apoptotic process);GO:0061630(ubiquitin protein ligase activity);GO:1990001(inhibition of cysteine-type endopeptidase activity involved in apoptotic process)	04120(Ubiquitin mediated proteolysis);04210(Apoptosis);04217(Necroptosis);04510(Focal adhesion);04621(NOD-like receptor signaling pathway);05168(Herpes simplex virus 1 infection)	K16060	NA
2	ENSDARG00000070214	slc41a1	1.88788	1.11669	0.757538	0.259	0.182	3.01426e-18	8.35311e-14	solute carrier family 41 (magnesium transporter), member 1 [Source:ZFIN;Acc:ZDB-GENE-030131-4700]	GO:0005886(plasma membrane);GO:0006812(cation transport);GO:0008324(cation transmembrane transporter activity);GO:0016020(membrane);GO:0016021(integral component of membrane);GO:0043009(chordate embryonic development);GO:0048793(pronephros development);GO:0098655(cation transmembrane transport)	NA	K15122	NA
2	ENSDARG00000004301	rhogb	2.97912	1.98131	0.588437	0.362	0.342	3.08887e-18	8.55988e-14	ras homolog family member Gb [Source:ZFIN;Acc:ZDB-GENE-030131-8877]	GO:0000166(nucleotide binding);GO:0003924(GTPase activity);GO:0005525(GTP binding);GO:0005622(intracellular);GO:0005737(cytoplasm);GO:0005886(plasma membrane);GO:0005938(cell cortex);GO:0007015(actin filament organization);GO:0007163(establishment or maintenance of cell polarity);GO:0007264(small GTPase mediated signal transduction);GO:0007266(Rho protein signal transduction);GO:0008360(regulatio…	05132(Salmonella infection)	K07863	NA
2	ENSDARG00000074287	sptlc2b	4.4076	2.91859	0.594722	0.496	0.471	3.50038e-18	9.70026e-14	serine palmitoyltransferase, long chain base subunit 2b [Source:ZFIN;Acc:ZDB-GENE-080305-8]	GO:0003824(catalytic activity);GO:0009058(biosynthetic process);GO:0016020(membrane);GO:0016021(integral component of membrane);GO:0016740(transferase activity);GO:0030170(pyridoxal phosphate binding)	00600(Sphingolipid metabolism)	K00654	EC:2.3.1.50
2	ENSDARG00000099766	myl12.1	8.40651	6.06049	0.472072	0.741	0.773	3.71553e-18	1.02965e-13	myosin, light chain 12, genome duplicate 1 [Source:ZFIN;Acc:ZDB-GENE-030131-4918]	GO:0005509(calcium ion binding)	04270(Vascular smooth muscle contraction);04510(Focal adhesion);04530(Tight junction);04810(Regulation of actin cytoskeleton)	K12755	NA
2	ENSDARG00000104227	nop10	2.00883	1.49671	0.424564	0.277	0.311	4.27091e-18	1.18355e-13	NOP10 ribonucleoprotein homolog (yeast) [Source:ZFIN;Acc:ZDB-GENE-041007-4]	GO:0001522(pseudouridine synthesis);GO:0005634(nucleus);GO:0005697(telomerase holoenzyme complex);GO:0005730(nucleolus);GO:0006364(rRNA processing);GO:0007004(telomere maintenance via telomerase);GO:0030515(snoRNA binding);GO:0031118(rRNA pseudouridine synthesis);GO:0031120(snRNA pseudouridine synthesis);GO:0031429(box H/ACA snoRNP complex);GO:0034513(box H/ACA snoRNA binding);GO:0042254(ribosome…	03008(Ribosome biogenesis in eukaryotes)	K11130	NA
2	ENSDARG00000038785	abcf2a	1.7458	1.39401	0.324642	0.246	0.333	4.32521e-18	1.1986e-13	ATP-binding cassette, sub-family F (GCN20), member 2a [Source:ZFIN;Acc:ZDB-GENE-030131-8714]	GO:0000166(nucleotide binding);GO:0005524(ATP binding);GO:0016887(ATPase activity)	NA	K06185	NA
2	ENSDARG00000011613	rbm39a	1.74896	1.39819	0.32293	0.277	0.319	5.17603e-18	1.43438e-13	RNA binding motif protein 39a [Source:ZFIN;Acc:ZDB-GENE-040426-2852]	GO:0003676(nucleic acid binding);GO:0003723(RNA binding);GO:0005634(nucleus);GO:0006397(mRNA processing)	NA	K13091	NA
2	ENSDARG00000022303	higd1a	11.4044	7.3711	0.629635	0.821	0.792	5.2551e-18	1.45629e-13	HIG1 hypoxia inducible domain family, member 1A [Source:ZFIN;Acc:ZDB-GENE-030826-15]	GO:0016020(membrane);GO:0016021(integral component of membrane)	NA	NA	NA
2	ENSDARG00000045359	elocb	1.10161	0.863946	0.350604	0.183	0.225	6.73541e-18	1.86652e-13	elongin C paralog b [Source:ZFIN;Acc:ZDB-GENE-040718-138]	GO:0004842(ubiquitin-protein transferase activity);GO:0006511(ubiquitin-dependent protein catabolic process);GO:0016567(protein ubiquitination);GO:0032968(positive regulation of transcription elongation from RNA polymerase II promoter);GO:0070449(elongin complex)	04120(Ubiquitin mediated proteolysis)	K03872	NA
2	ENSDARG00000040031	tardbp	1.21524	0.989705	0.296166	0.183	0.238	1.00691e-17	2.79034e-13	TAR DNA binding protein [Source:ZFIN;Acc:ZDB-GENE-030131-3777]	GO:0003676(nucleic acid binding);GO:0003690(double-stranded DNA binding);GO:0003723(RNA binding);GO:0003727(single-stranded RNA binding);GO:0003730(mRNA 3'-UTR binding);GO:0005654(nucleoplasm);GO:0005737(cytoplasm);GO:0007409(axonogenesis);GO:0007519(skeletal muscle tissue development);GO:0007626(locomotory behavior);GO:0048514(blood vessel morphogenesis);GO:0048675(axon extension);GO:0070935(3'-…	NA	NA	NA
2	ENSDARG00000052419	ankrd12	2.47537	2.02054	0.2929	0.286	0.397	1.01052e-17	2.80036e-13	ankyrin repeat domain 12 [Source:ZFIN;Acc:ZDB-GENE-040426-846]	GO:0003674(molecular_function);GO:0005515(protein binding);GO:0005575(cellular_component);GO:0008150(biological_process)	NA	K21436	NA
2	ENSDARG00000100823	selenok	1.30936	1.09183	0.26211	0.196	0.268	1.05424e-17	2.92152e-13	selenoprotein K [Source:ZFIN;Acc:ZDB-GENE-040912-131]	GO:0016020(membrane);GO:0016021(integral component of membrane)	NA	NA	NA
2	ENSDARG00000104782	oaz1b	6.99317	5.61634	0.316317	0.683	0.788	1.06727e-17	2.95763e-13	ornithine decarboxylase antizyme 1b [Source:ZFIN;Acc:ZDB-GENE-020731-5]	GO:0005829(cytosol);GO:0006595(polyamine metabolic process);GO:0008073(ornithine decarboxylase inhibitor activity);GO:0043086(negative regulation of catalytic activity)	NA	K16613	NA
2	ENSDARG00000026766	bcl2l10	15.2379	8.51723	0.839208	0.665	0.559	1.29786e-17	3.59663e-13	BCL2 like 10 [Source:ZFIN;Acc:ZDB-GENE-030825-2]	GO:0001756(somitogenesis);GO:0005515(protein binding);GO:0005739(mitochondrion);GO:0005741(mitochondrial outer membrane);GO:0007369(gastrulation);GO:0008630(intrinsic apoptotic signaling pathway in response to DNA damage);GO:0016020(membrane);GO:0016021(integral component of membrane);GO:0019722(calcium-mediated signaling);GO:0042803(protein homodimerization activity);GO:0042981(regulation of apo…	NA	K18451	NA
2	ENSDARG00000007257	rab5ab	1.74178	1.39229	0.323105	0.25	0.325	1.3916e-17	3.85641e-13	RAB5A, member RAS oncogene family, b [Source:ZFIN;Acc:ZDB-GENE-040122-3]	GO:0003924(GTPase activity);GO:0005525(GTP binding);GO:0005768(endosome);GO:0005769(early endosome);GO:0005886(plasma membrane);GO:0006886(intracellular protein transport);GO:0006897(endocytosis);GO:0030100(regulation of endocytosis);GO:0030139(endocytic vesicle);GO:0032482(Rab protein signal transduction);GO:0038092(nodal signaling pathway);GO:0055113(epiboly involved in gastrulation with mouth …	04144(Endocytosis);04145(Phagosome)	K07887	NA
2	ENSDARG00000062933	cmip	8.30196	6.13402	0.436618	0.714	0.769	1.47838e-17	4.09688e-13	c-Maf inducing protein [Source:ZFIN;Acc:ZDB-GENE-050419-50]	NA	NA	NA	NA
2	ENSDARG00000095451	si:ch211-196l7.4	6.57202	4.662	0.495389	0.638	0.669	2.01082e-17	5.57237e-13	si:ch211-196l7.4 [Source:ZFIN;Acc:ZDB-GENE-050419-122]	NA	NA	NA	NA
2	ENSDARG00000052073	blcap	1.55427	1.19828	0.375273	0.237	0.289	2.06792e-17	5.73062e-13	bladder cancer associated protein [Source:ZFIN;Acc:ZDB-GENE-000330-7]	GO:0003674(molecular_function);GO:0016020(membrane);GO:0016021(integral component of membrane)	NA	NA	NA
2	ENSDARG00000038068	ddx5	18.942	12.4034	0.610857	0.951	0.929	2.27895e-17	6.31543e-13	DEAD (Asp-Glu-Ala-Asp) box helicase 5 [Source:ZFIN;Acc:ZDB-GENE-030131-925]	GO:0000166(nucleotide binding);GO:0003676(nucleic acid binding);GO:0004386(helicase activity);GO:0005524(ATP binding);GO:0016020(membrane);GO:0016021(integral component of membrane);GO:0016787(hydrolase activity)	03040(Spliceosome)	K12823	EC:3.6.4.13
2	ENSDARG00000095908	sat1a.2	33.6286	23.2697	0.531236	0.982	0.978	2.42853e-17	6.72993e-13	spermidine/spermine N1-acetyltransferase 1a, duplicate 2 [Source:ZFIN;Acc:ZDB-GENE-040704-4]	GO:0004145(diamine N-acetyltransferase activity);GO:0005515(protein binding);GO:0005575(cellular_component);GO:0008080(N-acetyltransferase activity);GO:0016740(transferase activity);GO:0019809(spermidine binding);GO:0032918(spermidine acetylation)	00330(Arginine and proline metabolism);04216(Ferroptosis)	K00657	EC:2.3.1.57
2	ENSDARG00000032802	ktn1	1.07602	0.786838	0.45157	0.179	0.172	2.61075e-17	7.23491e-13	kinectin 1 [Source:ZFIN;Acc:ZDB-GENE-030408-4]	GO:0007018(microtubule-based movement);GO:0016020(membrane);GO:0016021(integral component of membrane);GO:0019894(kinesin binding)	NA	K17975	NA
2	ENSDARG00000098367	srp54	1.46215	1.13048	0.371158	0.214	0.259	2.99392e-17	8.29676e-13	signal recognition particle 54 [Source:ZFIN;Acc:ZDB-GENE-040426-818]	GO:0000166(nucleotide binding);GO:0003723(RNA binding);GO:0003924(GTPase activity);GO:0005525(GTP binding);GO:0005737(cytoplasm);GO:0005786(signal recognition particle, endoplasmic reticulum targeting);GO:0006614(SRP-dependent cotranslational protein targeting to membrane);GO:0008312(7S RNA binding);GO:0030593(neutrophil chemotaxis);GO:0031017(exocrine pancreas development);GO:0045047(protein tar…	03060(Protein export)	K03106	EC:3.6.5.4
2	ENSDARG00000059725	hypk	0.950091	0.778116	0.288079	0.147	0.212	3.33198e-17	9.2336e-13	huntingtin interacting protein K [Source:ZFIN;Acc:ZDB-GENE-080515-6]	GO:0003674(molecular_function);GO:0005575(cellular_component);GO:0008150(biological_process)	NA	NA	NA
2	ENSDARG00000021647	gnai1	2.42035	1.95336	0.309258	0.321	0.403	3.54882e-17	9.83448e-13	guanine nucleotide binding protein (G protein), alpha inhibiting activity polypeptide 1 [Source:ZFIN;Acc:ZDB-GENE-040426-1310]	GO:0000166(nucleotide binding);GO:0001664(G protein-coupled receptor binding);GO:0003924(GTPase activity);GO:0005525(GTP binding);GO:0005834(heterotrimeric G-protein complex);GO:0007165(signal transduction);GO:0007186(G protein-coupled receptor signaling pathway);GO:0007188(adenylate cyclase-modulating G protein-coupled receptor signaling pathway);GO:0019001(guanyl nucleotide binding);GO:0031683(…	04261(Adrenergic signaling in cardiomyocytes);04371(Apelin signaling pathway);04540(Gap junction);04914(Progesterone-mediated oocyte maturation);04916(Melanogenesis)	K04630	NA
2	ENSDARG00000096959	si:dkey-29h14.10	1.31732	0.873193	0.593229	0.205	0.157	3.58416e-17	9.93241e-13	si:dkey-29h14.10 [Source:ZFIN;Acc:ZDB-GENE-131127-252]	GO:0042981(regulation of apoptotic process)	NA	NA	NA
2	ENSDARG00000070922	cnbpb	3.4278	2.80385	0.289872	0.402	0.528	3.61654e-17	1.00222e-12	CCHC-type zinc finger, nucleic acid binding protein b [Source:ZFIN;Acc:ZDB-GENE-030131-7782]	GO:0003676(nucleic acid binding);GO:0008270(zinc ion binding)	NA	K09250	NA
2	ENSDARG00000077515	letm2	2.03597	1.52174	0.419997	0.281	0.335	4.10828e-17	1.13849e-12	leucine zipper-EF-hand containing transmembrane protein 2 [Source:ZFIN;Acc:ZDB-GENE-090521-4]	GO:0005739(mitochondrion);GO:0005743(mitochondrial inner membrane);GO:0016020(membrane);GO:0016021(integral component of membrane);GO:0043022(ribosome binding)	NA	NA	NA
2	ENSDARG00000052244	zgc:158564	1.79856	1.42593	0.334936	0.214	0.31	4.47579e-17	1.24033e-12	zgc:158564 [Source:ZFIN;Acc:ZDB-GENE-070112-1662]	GO:0003674(molecular_function);GO:0005575(cellular_component);GO:0008150(biological_process)	NA	NA	NA
2	ENSDARG00000016505	apbb1ip	1.03638	0.834864	0.311945	0.134	0.2	4.62954e-17	1.28294e-12	amyloid beta (A4) precursor protein-binding, family B, member 1 interacting protein [Source:ZFIN;Acc:ZDB-GENE-040426-1318]	GO:0007165(signal transduction)	NA	NA	NA
2	ENSDARG00000004078	acsl4a	2.49231	1.83165	0.444337	0.317	0.367	4.98939e-17	1.38266e-12	acyl-CoA synthetase long chain family member 4a [Source:ZFIN;Acc:ZDB-GENE-040426-1565]	GO:0003824(catalytic activity);GO:0009953(dorsal/ventral pattern formation);GO:0016020(membrane);GO:0016021(integral component of membrane);GO:0030513(positive regulation of BMP signaling pathway);GO:0051896(regulation of protein kinase B signaling);GO:1900744(regulation of p38MAPK cascade)	00061(Fatty acid biosynthesis);00071(Fatty acid degradation);03320(PPAR signaling pathway);04146(Peroxisome);04216(Ferroptosis);04920(Adipocytokine signaling pathway)	K01897	EC:6.2.1.3
2	ENSDARG00000031756	mef2aa	1.17605	0.880845	0.41699	0.174	0.161	5.26509e-17	1.45906e-12	myocyte enhancer factor 2aa [Source:ZFIN;Acc:ZDB-GENE-990415-163]	GO:0000790(nuclear chromatin);GO:0000976(transcription regulatory region sequence-specific DNA binding);GO:0000977(RNA polymerase II regulatory region sequence-specific DNA binding);GO:0000978(RNA polymerase II proximal promoter sequence-specific DNA binding);GO:0001756(somitogenesis);GO:0003677(DNA binding);GO:0005634(nucleus);GO:0007507(heart development);GO:0010628(positive regulation of gene …	04371(Apelin signaling pathway)	K09260	NA
2	ENSDARG00000007923	ptpn1	1.57276	1.29463	0.280762	0.219	0.3	5.31748e-17	1.47358e-12	protein tyrosine phosphatase, non-receptor type 1 [Source:ZFIN;Acc:ZDB-GENE-980605-23]	GO:0004721(phosphoprotein phosphatase activity);GO:0004725(protein tyrosine phosphatase activity);GO:0006470(protein dephosphorylation);GO:0016311(dephosphorylation);GO:0016787(hydrolase activity);GO:0016791(phosphatase activity);GO:0035335(peptidyl-tyrosine dephosphorylation)	04520(Adherens junction);04910(Insulin signaling pathway)	K05696	EC:3.1.3.48
2	ENSDARG00000013804	capns1b	1.16182	0.833839	0.478546	0.179	0.185	5.33254e-17	1.47775e-12	calpain, small subunit 1 b [Source:ZFIN;Acc:ZDB-GENE-030131-5206]	GO:0005509(calcium ion binding)	NA	K08583	NA
2	ENSDARG00000006074	uck2a	1.14091	0.837737	0.445617	0.17	0.179	5.65071e-17	1.56592e-12	uridine-cytidine kinase 2a [Source:ZFIN;Acc:ZDB-GENE-030131-7158]	GO:0000166(nucleotide binding);GO:0004849(uridine kinase activity);GO:0005524(ATP binding);GO:0005829(cytosol);GO:0006238(CMP salvage);GO:0016301(kinase activity);GO:0016310(phosphorylation);GO:0016740(transferase activity);GO:0019206(nucleoside kinase activity);GO:0044206(UMP salvage);GO:0044211(CTP salvage)	00240(Pyrimidine metabolism);00983(Drug metabolism - other enzymes)	K00876	EC:2.7.1.48
2	ENSDARG00000053291	pnrc2	50.8845	38.403	0.406008	1	0.992	5.67343e-17	1.57222e-12	proline-rich nuclear receptor coactivator 2 [Source:ZFIN;Acc:ZDB-GENE-030131-5475]	GO:0000184(nuclear-transcribed mRNA catabolic process, nonsense-mediated decay);GO:0000932(P-body);GO:0000956(nuclear-transcribed mRNA catabolic process);GO:0005634(nucleus);GO:0005737(cytoplasm)	NA	K18751	NA
2	ENSDARG00000070657	pa2g4b	1.38695	1.12734	0.298986	0.214	0.266	5.77826e-17	1.60127e-12	proliferation-associated 2G4, b [Source:ZFIN;Acc:ZDB-GENE-030131-2182]	GO:0003676(nucleic acid binding);GO:0005730(nucleolus);GO:0005737(cytoplasm)	NA	NA	NA
2	ENSDARG00000022280	brd2a	11.4757	7.83438	0.550695	0.772	0.812	6.12639e-17	1.69774e-12	bromodomain containing 2a [Source:ZFIN;Acc:ZDB-GENE-990415-248]	GO:0002574(thrombocyte differentiation);GO:0003674(molecular_function);GO:0005515(protein binding);GO:0005575(cellular_component);GO:0021510(spinal cord development);GO:0030902(hindbrain development);GO:0030917(midbrain-hindbrain boundary development);GO:0042981(regulation of apoptotic process)	NA	K08871	NA
2	ENSDARG00000038429	csrnp1b	1.13238	0.790542	0.51844	0.174	0.142	6.18973e-17	1.7153e-12	cysteine-serine-rich nuclear protein 1b [Source:ZFIN;Acc:ZDB-GENE-030131-1515]	GO:0003674(molecular_function);GO:0005575(cellular_component);GO:0021536(diencephalon development);GO:0030901(midbrain development)	NA	K17494	NA
2	ENSDARG00000071491	nrros	2.25471	1.28764	0.808217	0.268	0.199	6.27998e-17	1.74031e-12	negative regulator of reactive oxygen species [Source:ZFIN;Acc:ZDB-GENE-040808-36]	GO:0005515(protein binding);GO:0016020(membrane);GO:0016021(integral component of membrane)	NA	NA	NA
2	ENSDARG00000086842	dap1b	3.72747	2.78795	0.418992	0.397	0.462	6.60181e-17	1.82949e-12	death associated protein 1b [Source:ZFIN;Acc:ZDB-GENE-000511-4]	GO:0010507(negative regulation of autophagy);GO:0034198(cellular response to amino acid starvation);GO:0070513(death domain binding);GO:0097190(apoptotic signaling pathway)	NA	NA	NA
2	ENSDARG00000011545	arrb2b	1.5657	1.26929	0.302784	0.232	0.283	6.96712e-17	1.93073e-12	arrestin, beta 2b [Source:ZFIN;Acc:ZDB-GENE-040426-1332]	GO:0001919(regulation of receptor recycling);GO:0007165(signal transduction);GO:0007517(muscle organ development);GO:0008589(regulation of smoothened signaling pathway);GO:1900136(regulation of chemokine activity)	04010(MAPK signaling pathway);04144(Endocytosis);04340(Hedgehog signaling pathway)	K04439	NA
2	ENSDARG00000006672	fam49a	1.42993	0.967401	0.563756	0.201	0.174	7.62733e-17	2.11369e-12	family with sequence similarity 49 member A [Source:ZFIN;Acc:ZDB-GENE-031002-50]	GO:0003674(molecular_function);GO:0045580(regulation of T cell differentiation);GO:0048538(thymus development)	NA	NA	NA
2	ENSDARG00000028335	hmga1a	4.50043	3.23682	0.475489	0.46	0.509	7.73335e-17	2.14307e-12	high mobility group AT-hook 1a [Source:ZFIN;Acc:ZDB-GENE-010502-1]	GO:0000785(chromatin);GO:0003677(DNA binding);GO:0005634(nucleus);GO:0006355(regulation of transcription, DNA-templated);GO:0043484(regulation of RNA splicing)	NA	K09282	NA
2	ENSDARG00000023053	fam129ab	1.24554	0.852264	0.547405	0.174	0.158	9.28822e-17	2.57395e-12	family with sequence similarity 129 member Ab [Source:ZFIN;Acc:ZDB-GENE-070912-688]	NA	NA	NA	NA
2	ENSDARG00000099195	ier2a	2.75246	2.14059	0.36271	0.299	0.387	1.00458e-16	2.78389e-12	immediate early response 2a [Source:ZFIN;Acc:ZDB-GENE-030131-9126]	NA	NA	NA	NA
2	ENSDARG00000007347	degs1	1.67964	1.27812	0.394132	0.259	0.292	1.09264e-16	3.02793e-12	delta(4)-desaturase, sphingolipid 1 [Source:ZFIN;Acc:ZDB-GENE-030131-5283]	GO:0005783(endoplasmic reticulum);GO:0005789(endoplasmic reticulum membrane);GO:0006629(lipid metabolic process);GO:0016020(membrane);GO:0016021(integral component of membrane);GO:0016491(oxidoreductase activity);GO:0030148(sphingolipid biosynthetic process);GO:0042284(sphingolipid delta-4 desaturase activity);GO:0046513(ceramide biosynthetic process);GO:0055114(oxidation-reduction process)	00600(Sphingolipid metabolism)	K04712	1.14.18.5;EC:1.14.19.17
2	ENSDARG00000002659	mapre1b	0.766201	0.638244	0.263615	0.103	0.156	1.10513e-16	3.06255e-12	microtubule-associated protein, RP/EB family, member 1b [Source:ZFIN;Acc:ZDB-GENE-040426-2256]	GO:0005515(protein binding);GO:0005815(microtubule organizing center);GO:0005874(microtubule);GO:0005881(cytoplasmic microtubule);GO:0005886(plasma membrane);GO:0008017(microtubule binding);GO:0031110(regulation of microtubule polymerization or depolymerization);GO:0035371(microtubule plus-end);GO:0035372(protein localization to microtubule);GO:0051010(microtubule plus-end binding);GO:0051225(spi…	NA	K10436	NA
2	ENSDARG00000015149	wasa	3.48	2.41436	0.527449	0.384	0.421	1.12197e-16	3.10921e-12	Wiskott-Aldrich syndrome (eczema-thrombocytopenia) a [Source:ZFIN;Acc:ZDB-GENE-081104-419]	GO:0000147(actin cortical patch assembly);GO:0003779(actin binding);GO:0005884(actin filament);GO:0006897(endocytosis);GO:0007015(actin filament organization);GO:0030048(actin filament-based movement);GO:0030479(actin cortical patch);GO:0051015(actin filament binding);GO:0051127(positive regulation of actin nucleation);GO:0051666(actin cortical patch localization);GO:2000601(positive regulation o…	04144(Endocytosis);04520(Adherens junction);04530(Tight junction);04810(Regulation of actin cytoskeleton);05132(Salmonella infection)	K05747	NA
2	ENSDARG00000089626	ptges3b	1.21851	0.958065	0.346928	0.183	0.232	1.32876e-16	3.68227e-12	prostaglandin E synthase 3b (cytosolic) [Source:ZFIN;Acc:ZDB-GENE-040625-144]	GO:0003674(molecular_function);GO:0005575(cellular_component);GO:0005634(nucleus);GO:0005737(cytoplasm);GO:0005829(cytosol);GO:0006457(protein folding);GO:0008150(biological_process);GO:0051087(chaperone binding);GO:0051131(chaperone-mediated protein complex assembly);GO:0051879(Hsp90 protein binding)	00590(Arachidonic acid metabolism)	K15730	EC:5.3.99.3
2	ENSDARG00000101034	si:dkey-206d17.12	6.913	4.8659	0.506605	0.656	0.641	1.40542e-16	3.8947e-12	si:dkey-206d17.12 [Source:ZFIN;Acc:ZDB-GENE-081031-82]	GO:0046872(metal ion binding)	NA	K18668	EC:3.1.-.-
2	ENSDARG00000070545	top1l	2.12223	1.71145	0.310361	0.299	0.365	1.46539e-16	4.06088e-12	DNA topoisomerase I, like [Source:ZFIN;Acc:ZDB-GENE-060616-217]	GO:0003677(DNA binding);GO:0003916(DNA topoisomerase activity);GO:0003917(DNA topoisomerase type I activity);GO:0005694(chromosome);GO:0005730(nucleolus);GO:0006260(DNA replication);GO:0006265(DNA topological change);GO:0006338(chromatin remodeling);GO:0007059(chromosome segregation);GO:0016853(isomerase activity);GO:0031298(replication fork protection complex)	NA	K03163	EC:5.6.2.1
2	ENSDARG00000023989	pef1	1.40614	1.16533	0.271001	0.201	0.273	1.50549e-16	4.17201e-12	penta-EF-hand domain containing 1 [Source:ZFIN;Acc:ZDB-GENE-040801-259]	GO:0000139(Golgi membrane);GO:0005509(calcium ion binding);GO:0005737(cytoplasm);GO:0005783(endoplasmic reticulum);GO:0006888(endoplasmic reticulum to Golgi vesicle-mediated transport);GO:0012507(ER to Golgi transport vesicle membrane);GO:0014029(neural crest formation);GO:0014032(neural crest cell development);GO:0016020(membrane);GO:0030127(COPII vesicle coat);GO:0031410(cytoplasmic vesicle);GO…	NA	NA	NA
2	ENSDARG00000053542	kctd12.2	2.51961	1.48329	0.764397	0.263	0.24	1.5242e-16	4.22387e-12	potassium channel tetramerisation domain containing 12.2 [Source:ZFIN;Acc:ZDB-GENE-060117-4]	GO:0005515(protein binding);GO:0021986(habenula development);GO:0048814(regulation of dendrite morphogenesis);GO:0051260(protein homooligomerization)	NA	K21918	NA
2	ENSDARG00000012688	eif1b	9.08551	6.85703	0.405983	0.759	0.82	1.65664e-16	4.59087e-12	eukaryotic translation initiation factor 1B [Source:ZFIN;Acc:ZDB-GENE-030131-956]	GO:0003723(RNA binding);GO:0003743(translation initiation factor activity);GO:0006413(translational initiation);GO:0016282(eukaryotic 43S preinitiation complex);GO:0043024(ribosomal small subunit binding)	03013(RNA transport)	K03113	NA
2	ENSDARG00000001498	skap1	1.51002	1.04297	0.533877	0.214	0.199	1.83462e-16	5.08411e-12	src kinase associated phosphoprotein 1 [Source:ZFIN;Acc:ZDB-GENE-090721-1]	GO:0005515(protein binding);GO:0005737(cytoplasm);GO:0005886(plasma membrane)	NA	NA	NA
2	ENSDARG00000053702	il2rgb	1.44566	0.940049	0.62092	0.214	0.154	1.86601e-16	5.17108e-12	interleukin 2 receptor, gamma b [Source:ZFIN;Acc:ZDB-GENE-080402-2]	GO:0004896(cytokine receptor activity);GO:0005515(protein binding);GO:0009897(external side of plasma membrane);GO:0016020(membrane);GO:0016021(integral component of membrane);GO:0019221(cytokine-mediated signaling pathway);GO:0019955(cytokine binding);GO:0019976(interleukin-2 binding);GO:0043235(receptor complex)	04060(Cytokine-cytokine receptor interaction);04144(Endocytosis)	K05070	NA
2	ENSDARG00000101828	si:dkey-16p6.1.17	1.84437	1.46535	0.331883	0.25	0.307	1.89532e-16	5.25232e-12	si:dkey-16p6.1 [Source:ZFIN;Acc:ZDB-GENE-081103-43]	GO:0000166(nucleotide binding);GO:0005515(protein binding);GO:0005524(ATP binding)	NA	NA	NA
2	ENSDARG00000002710	ncl	12.9175	9.01907	0.518279	0.83	0.837	2.06729e-16	5.72887e-12	nucleolin [Source:ZFIN;Acc:ZDB-GENE-030131-6986]	GO:0001947(heart looping);GO:0003676(nucleic acid binding);GO:0003723(RNA binding);GO:0003729(mRNA binding);GO:0005634(nucleus);GO:0005737(cytoplasm);GO:0006364(rRNA processing);GO:0009303(rRNA transcription);GO:0071014(post-mRNA release spliceosomal complex);GO:1990904(ribonucleoprotein complex);GO:2000815(regulation of mRNA stability involved in response to oxidative stress)	NA	K11294	NA
2	ENSDARG00000053468	adam10a	1.6017	1.22927	0.381804	0.219	0.266	2.17119e-16	6.01681e-12	ADAM metallopeptidase domain 10a [Source:ZFIN;Acc:ZDB-GENE-040917-2]	GO:0004222(metalloendopeptidase activity);GO:0006508(proteolysis);GO:0006509(membrane protein ectodomain proteolysis);GO:0007219(Notch signaling pathway);GO:0008237(metallopeptidase activity);GO:0016020(membrane);GO:0016021(integral component of membrane)	NA	K06704	EC:3.4.24.81
2	ENSDARG00000044267	sumo1	1.21536	0.976019	0.316406	0.205	0.237	2.20957e-16	6.12315e-12	small ubiquitin-like modifier 1 [Source:ZFIN;Acc:ZDB-GENE-040426-2186]	GO:0005515(protein binding);GO:0005634(nucleus);GO:0005737(cytoplasm);GO:0005886(plasma membrane);GO:0016020(membrane);GO:0016605(PML body);GO:0016925(protein sumoylation);GO:0031386(protein tag);GO:0034605(cellular response to heat);GO:0043009(chordate embryonic development);GO:0044389(ubiquitin-like protein ligase binding);GO:0060216(definitive hemopoiesis);GO:0071276(cellular response to cadmi…	03013(RNA transport)	K12160	NA
2	ENSDARG00000020893	slc25a55a	3.93226	3.16783	0.311865	0.478	0.57	2.21755e-16	6.14528e-12	solute carrier family 25, member 55a [Source:ZFIN;Acc:ZDB-GENE-040426-2745]	GO:0005313(L-glutamate transmembrane transporter activity);GO:0005743(mitochondrial inner membrane);GO:0015183(L-aspartate transmembrane transporter activity);GO:0015810(aspartate transmembrane transport);GO:0015813(L-glutamate transmembrane transport);GO:0016020(membrane);GO:0016021(integral component of membrane);GO:0022857(transmembrane transporter activity);GO:0043490(malate-aspartate shuttle…	NA	K15107	NA
2	ENSDARG00000059246	hnrnpd	1.55763	1.08964	0.515503	0.246	0.232	2.42252e-16	6.71328e-12	heterogeneous nuclear ribonucleoprotein D [Source:ZFIN;Acc:ZDB-GENE-070424-97]	GO:0003676(nucleic acid binding);GO:0003680(AT DNA binding);GO:0003723(RNA binding);GO:0003729(mRNA binding);GO:0005654(nucleoplasm);GO:0008150(biological_process);GO:0035925(mRNA 3'-UTR AU-rich region binding);GO:0043565(sequence-specific DNA binding);GO:1990837(sequence-specific double-stranded DNA binding);GO:1990904(ribonucleoprotein complex)	NA	K13044	NA
2	ENSDARG00000058454	dynll1	1.38442	1.11216	0.315923	0.183	0.237	2.74675e-16	7.6118e-12	dynein, light chain, LC8-type 1 [Source:ZFIN;Acc:ZDB-GENE-040426-1961]	GO:0003774(motor activity);GO:0005737(cytoplasm);GO:0005856(cytoskeleton);GO:0005868(cytoplasmic dynein complex);GO:0005874(microtubule);GO:0005875(microtubule associated complex);GO:0007017(microtubule-based process);GO:0008574(ATP-dependent microtubule motor activity, plus-end-directed);GO:0030286(dynein complex);GO:0045505(dynein intermediate chain binding);GO:0051959(dynein light intermediate…	NA	K10418	NA
2	ENSDARG00000051886	ankrd11	2.93579	2.40137	0.289893	0.33	0.439	2.9988e-16	8.31029e-12	ankyrin repeat domain 11 [Source:ZFIN;Acc:ZDB-GENE-030131-3932]	GO:0005515(protein binding);GO:0005634(nucleus)	NA	K21436	NA
2	ENSDARG00000037965	srrm2	2.12242	1.6865	0.331676	0.286	0.359	3.11117e-16	8.62168e-12	serine/arginine repetitive matrix 2 [Source:ZFIN;Acc:ZDB-GENE-050522-399]	GO:0008150(biological_process)	NA	K13172	NA
2	ENSDARG00000018898	zfand5a	2.37807	1.70639	0.478847	0.308	0.326	3.15946e-16	8.7555e-12	zinc finger, AN1-type domain 5a [Source:ZFIN;Acc:ZDB-GENE-040426-1979]	GO:0003677(DNA binding);GO:0008270(zinc ion binding);GO:0046872(metal ion binding)	NA	NA	NA
2	ENSDARG00000043976	etf1b	2.47861	2.05926	0.267405	0.362	0.437	3.31006e-16	9.17285e-12	eukaryotic translation termination factor 1b [Source:ZFIN;Acc:ZDB-GENE-021029-1]	GO:0002184(cytoplasmic translational termination);GO:0003747(translation release factor activity);GO:0005737(cytoplasm);GO:0005829(cytosol);GO:0006415(translational termination);GO:0007420(brain development);GO:0016149(translation release factor activity, codon specific);GO:0018444(translation release factor complex);GO:1990825(sequence-specific mRNA binding)	03015(mRNA surveillance pathway)	K03265	NA
2	ENSDARG00000020504	h3f3a	4.26546	3.36386	0.342584	0.496	0.584	3.4188e-16	9.47419e-12	H3 histone, family 3A [Source:ZFIN;Acc:ZDB-GENE-040426-1928]	GO:0000786(nucleosome);GO:0003677(DNA binding);GO:0005634(nucleus);GO:0005694(chromosome);GO:0031492(nucleosomal DNA binding);GO:0046982(protein heterodimerization activity)	NA	K11253	NA
2	ENSDARG00000060071	tent4b	1.30173	1.02007	0.351766	0.174	0.237	5.30157e-16	1.46917e-11	terminal nucleotidyltransferase 4B [Source:ZFIN;Acc:ZDB-GENE-041021-2]	GO:0003723(RNA binding);GO:0004652(polynucleotide adenylyltransferase activity);GO:0005730(nucleolus);GO:0016779(nucleotidyltransferase activity);GO:0031499(TRAMP complex);GO:0043631(RNA polyadenylation);GO:0071044(histone mRNA catabolic process);GO:0071050(snoRNA polyadenylation)	03018(RNA degradation)	K03514	EC:2.7.7.19
2	ENSDARG00000019307	dusp5	9.08239	5.71499	0.66832	0.692	0.528	5.31663e-16	1.47334e-11	dual specificity phosphatase 5 [Source:ZFIN;Acc:ZDB-GENE-010625-1]	GO:0000188(inactivation of MAPK activity);GO:0004721(phosphoprotein phosphatase activity);GO:0004725(protein tyrosine phosphatase activity);GO:0005634(nucleus);GO:0005737(cytoplasm);GO:0006470(protein dephosphorylation);GO:0008138(protein tyrosine/serine/threonine phosphatase activity);GO:0016311(dephosphorylation);GO:0016787(hydrolase activity);GO:0016791(phosphatase activity);GO:0017017(MAP kin…	04010(MAPK signaling pathway)	K04459	3.1.3.48;EC:3.1.3.16
2	ENSDARG00000089043	ptpn6	3.58661	2.29703	0.642846	0.371	0.369	6.4222e-16	1.77972e-11	protein tyrosine phosphatase, non-receptor type 6 [Source:ZFIN;Acc:ZDB-GENE-030131-7513]	GO:0004721(phosphoprotein phosphatase activity);GO:0004725(protein tyrosine phosphatase activity);GO:0005737(cytoplasm);GO:0006470(protein dephosphorylation);GO:0016311(dephosphorylation);GO:0016787(hydrolase activity);GO:0016791(phosphatase activity);GO:0035335(peptidyl-tyrosine dephosphorylation);GO:0045087(innate immune response)	04520(Adherens junction)	K05697	EC:3.1.3.48
2	ENSDARG00000079636	fam177a1	0.830108	0.691179	0.264239	0.116	0.167	8.62446e-16	2.39001e-11	family with sequence similarity 177 member A1 [Source:ZFIN;Acc:ZDB-GENE-070928-21]	GO:0003674(molecular_function);GO:0005575(cellular_component);GO:0008150(biological_process)	NA	NA	NA
2	ENSDARG00000000068	slc9a3r1a	1.87138	1.18038	0.664853	0.263	0.219	8.67738e-16	2.40467e-11	SLC9A3 regulator 1a [Source:ZFIN;Acc:ZDB-GENE-031006-7]	GO:0005515(protein binding);GO:0005886(plasma membrane);GO:0006612(protein targeting to membrane);GO:0012505(endomembrane system);GO:0016020(membrane);GO:0021591(ventricular system development);GO:0032947(protein-containing complex scaffold activity);GO:0043113(receptor clustering);GO:0055078(sodium ion homeostasis);GO:0071599(otic vesicle development)	04530(Tight junction)	K13365	NA
2	ENSDARG00000006125	csnk1db	1.51064	1.22711	0.299895	0.205	0.285	8.88909e-16	2.46334e-11	casein kinase 1, delta b [Source:ZFIN;Acc:ZDB-GENE-040426-2385]	GO:0000166(nucleotide binding);GO:0004672(protein kinase activity);GO:0004674(protein serine/threonine kinase activity);GO:0005524(ATP binding);GO:0005634(nucleus);GO:0005737(cytoplasm);GO:0005876(spindle microtubule);GO:0006468(protein phosphorylation);GO:0016055(Wnt signaling pathway);GO:0016301(kinase activity);GO:0016310(phosphorylation);GO:0016740(transferase activity);GO:0018105(peptidyl-se…	04340(Hedgehog signaling pathway);04540(Gap junction)	K08959	EC:2.7.11.1
2	ENSDARG00000016939	itgb2	3.02057	2.35226	0.360774	0.335	0.407	8.99219e-16	2.49192e-11	integrin, beta 2 [Source:ZFIN;Acc:ZDB-GENE-110411-4]	GO:0005178(integrin binding);GO:0005925(focal adhesion);GO:0007155(cell adhesion);GO:0007160(cell-matrix adhesion);GO:0007229(integrin-mediated signaling pathway);GO:0008305(integrin complex);GO:0009986(cell surface);GO:0016020(membrane);GO:0016021(integral component of membrane);GO:0016477(cell migration);GO:0033627(cell adhesion mediated by integrin);GO:0038023(signaling receptor activity)	04145(Phagosome);04514(Cell adhesion molecules (CAMs));04810(Regulation of actin cytoskeleton)	K06464	NA
2	ENSDARG00000091563	snw1	1.00331	0.753599	0.412898	0.152	0.17	9.39762e-16	2.60427e-11	SNW domain containing 1 [Source:ZFIN;Acc:ZDB-GENE-030131-571]	GO:0000398(mRNA splicing, via spliceosome);GO:0005681(spliceosomal complex);GO:0014029(neural crest formation);GO:0030513(positive regulation of BMP signaling pathway)	03040(Spliceosome);04330(Notch signaling pathway)	K06063	NA
2	ENSDARG00000056856	tax1bp1b	1.94592	1.5498	0.328366	0.277	0.338	1.06315e-15	2.94621e-11	Tax1 (human T-cell leukemia virus type I) binding protein 1b [Source:ZFIN;Acc:ZDB-GENE-030131-2872]	GO:0006915(apoptotic process);GO:0046872(metal ion binding)	04137(Mitophagy - animal)	K21347	NA
2	ENSDARG00000055751	fosb	2.71966	1.36007	0.999743	0.25	0.162	1.1639e-15	3.2254e-11	FBJ murine osteosarcoma viral oncogene homolog B [Source:ZFIN;Acc:ZDB-GENE-041114-181]	GO:0000978(RNA polymerase II proximal promoter sequence-specific DNA binding);GO:0003677(DNA binding);GO:0003700(DNA-binding transcription factor activity);GO:0005634(nucleus);GO:0006355(regulation of transcription, DNA-templated);GO:0006357(regulation of transcription by RNA polymerase II)	NA	K09029	NA
2	ENSDARG00000016623	si:ch211-195b13.1	4.85556	2.90699	0.740114	0.469	0.411	1.25205e-15	3.46968e-11	si:ch211-195b13.1 [Source:ZFIN;Acc:ZDB-GENE-030131-7626]	GO:0000166(nucleotide binding);GO:0004672(protein kinase activity);GO:0004674(protein serine/threonine kinase activity);GO:0005524(ATP binding);GO:0006468(protein phosphorylation);GO:0015459(potassium channel regulator activity);GO:0016301(kinase activity);GO:0016310(phosphorylation);GO:0016740(transferase activity);GO:0018105(peptidyl-serine phosphorylation);GO:0035091(phosphatidylinositol bindi…	NA	NA	NA
2	ENSDARG00000027777	tnfaip3	1.81628	1.36788	0.409051	0.237	0.287	1.39667e-15	3.87044e-11	tumor necrosis factor, alpha-induced protein 3 [Source:ZFIN;Acc:ZDB-GENE-100212-2]	GO:0003677(DNA binding);GO:0004843(thiol-dependent ubiquitin-specific protease activity);GO:0005634(nucleus);GO:0005737(cytoplasm);GO:0007010(cytoskeleton organization);GO:0008270(zinc ion binding);GO:0016477(cell migration);GO:0016567(protein ubiquitination);GO:0016579(protein deubiquitination);GO:0030177(positive regulation of Wnt signaling pathway);GO:0035523(protein K29-linked deubiquitinatio…	04217(Necroptosis);04621(NOD-like receptor signaling pathway)	K11859	EC:3.4.19.12
2	ENSDARG00000058366	si:dkey-222f8.3	1.75804	1.37069	0.359072	0.254	0.316	1.3985e-15	3.87552e-11	si:dkey-222f8.3 [Source:ZFIN;Acc:ZDB-GENE-030131-3658]	GO:0004521(endoribonuclease activity);GO:0090502(RNA phosphodiester bond hydrolysis, endonucleolytic)	NA	K14648	EC:3.1.-.-
2	ENSDARG00000019613	ip6k2b	2.0639	1.6164	0.352591	0.281	0.313	1.62465e-15	4.50222e-11	inositol hexakisphosphate kinase 2b [Source:ZFIN;Acc:ZDB-GENE-040718-85]	GO:0005575(cellular_component);GO:0016301(kinase activity);GO:0016310(phosphorylation);GO:0016740(transferase activity);GO:0032958(inositol phosphate biosynthetic process)	04070(Phosphatidylinositol signaling system)	K07756	EC:2.7.4.21
2	ENSDARG00000036588	mhc1zba	10.1522	6.42038	0.661068	0.67	0.675	1.71049e-15	4.74012e-11	major histocompatibility complex class I ZBA [Source:ZFIN;Acc:ZDB-GENE-040426-2149]	GO:0016020(membrane);GO:0016021(integral component of membrane)	NA	NA	NA
2	ENSDARG00000030949	srprb	1.29857	1.05679	0.297239	0.21	0.276	1.82444e-15	5.0559e-11	SRP receptor subunit beta [Source:ZFIN;Acc:ZDB-GENE-040718-311]	GO:0005525(GTP binding);GO:0016020(membrane);GO:0016021(integral component of membrane)	03060(Protein export)	K12272	NA
2	ENSDARG00000058128	msna	12.3763	9.24109	0.421447	0.781	0.841	1.9079e-15	5.28717e-11	moesin a [Source:ZFIN;Acc:ZDB-GENE-021211-2]	GO:0003779(actin binding);GO:0005856(cytoskeleton);GO:0007492(endoderm development);GO:0008092(cytoskeletal protein binding);GO:0072554(blood vessel lumenization)	04530(Tight junction);04810(Regulation of actin cytoskeleton)	K05763	NA
2	ENSDARG00000012892	ammecr1	1.36151	1.03773	0.391779	0.201	0.237	1.92052e-15	5.32215e-11	Alport syndrome, mental retardation, midface hypoplasia and elliptocytosis chromosomal region gene 1 homolog (human) [Source:ZFIN;Acc:ZDB-GENE-040426-1533]	GO:0003674(molecular_function);GO:0005575(cellular_component);GO:0008150(biological_process)	NA	NA	NA
2	ENSDARG00000077934	tegt	0.931272	0.656168	0.505137	0.138	0.127	2.01725e-15	5.5902e-11	testis enhanced gene transcript (BAX inhibitor 1) [Source:ZFIN;Acc:ZDB-GENE-030826-10]	GO:0003674(molecular_function);GO:0008150(biological_process);GO:0016020(membrane);GO:0016021(integral component of membrane)	NA	K21889	NA
2	ENSDARG00000097209	cox8b	1.64351	1.10542	0.572182	0.219	0.194	2.18528e-15	6.05584e-11	cytochrome c oxidase subunit 8B [Source:ZFIN;Acc:ZDB-GENE-110620-4]	GO:0004129(cytochrome-c oxidase activity);GO:0005739(mitochondrion);GO:0022900(electron transport chain);GO:0045277(respiratory chain complex IV);GO:1902600(proton transmembrane transport)	00190(Oxidative phosphorylation);04260(Cardiac muscle contraction)	K02273	NA
2	ENSDARG00000030933	ksr1b	1.15763	0.809749	0.515625	0.174	0.153	2.4072e-15	6.67083e-11	kinase suppressor of ras 1b [Source:ZFIN;Acc:ZDB-GENE-040724-45]	GO:0004672(protein kinase activity);GO:0005524(ATP binding);GO:0006468(protein phosphorylation);GO:0007265(Ras protein signal transduction);GO:0035556(intracellular signal transduction);GO:0046872(metal ion binding)	NA	NA	NA
2	ENSDARG00000096457	si:dkey-118j18.2	2.02713	1.5324	0.403646	0.268	0.316	2.41769e-15	6.69991e-11	si:dkey-118j18.2 [Source:ZFIN;Acc:ZDB-GENE-030131-8692]	GO:0016020(membrane);GO:0016021(integral component of membrane)	NA	NA	NA
2	ENSDARG00000015164	mknk2b	5.2418	3.9078	0.423706	0.518	0.534	2.6594e-15	7.36974e-11	MAP kinase interacting serine/threonine kinase 2b [Source:ZFIN;Acc:ZDB-GENE-030829-2]	GO:0000166(nucleotide binding);GO:0004672(protein kinase activity);GO:0004674(protein serine/threonine kinase activity);GO:0004683(calmodulin-dependent protein kinase activity);GO:0005516(calmodulin binding);GO:0005524(ATP binding);GO:0005634(nucleus);GO:0005737(cytoplasm);GO:0006468(protein phosphorylation);GO:0009931(calcium-dependent protein serine/threonine kinase activity);GO:0018105(peptidy…	04010(MAPK signaling pathway);04910(Insulin signaling pathway)	K04372	EC:2.7.11.1
2	ENSDARG00000025566	slc25a3b	7.99815	5.93256	0.431012	0.75	0.773	3.03577e-15	8.41274e-11	solute carrier family 25 (mitochondrial carrier; phosphate carrier), member 3b [Source:ZFIN;Acc:ZDB-GENE-040426-1916]	GO:0005315(inorganic phosphate transmembrane transporter activity);GO:0016020(membrane);GO:0016021(integral component of membrane);GO:0022857(transmembrane transporter activity);GO:0031305(integral component of mitochondrial inner membrane);GO:0035435(phosphate ion transmembrane transport)	NA	K15102	NA
2	ENSDARG00000069065	btg3	1.41462	0.990114	0.514747	0.21	0.196	3.15523e-15	8.74377e-11	B-cell translocation gene 3 [Source:ZFIN;Acc:ZDB-GENE-031113-19]	GO:0003674(molecular_function);GO:0005575(cellular_component);GO:0005634(nucleus);GO:0005737(cytoplasm);GO:0008150(biological_process);GO:0008285(negative regulation of cell population proliferation);GO:0045930(negative regulation of mitotic cell cycle)	03018(RNA degradation)	K14443	NA
2	ENSDARG00000075952	mbd2	1.59142	1.26642	0.329565	0.214	0.269	3.45435e-15	9.5727e-11	methyl-CpG binding domain protein 2 [Source:ZFIN;Acc:ZDB-GENE-030131-9049]	GO:0000122(negative regulation of transcription by RNA polymerase II);GO:0003677(DNA binding);GO:0005634(nucleus);GO:0006346(methylation-dependent chromatin silencing);GO:0008327(methyl-CpG binding)	NA	K11590	NA
2	ENSDARG00000023217	crema	5.93641	4.35405	0.447233	0.562	0.63	3.76382e-15	1.04303e-10	cAMP responsive element modulator a [Source:ZFIN;Acc:ZDB-GENE-030131-7031]	GO:0003677(DNA binding);GO:0003700(DNA-binding transcription factor activity);GO:0005515(protein binding);GO:0005634(nucleus);GO:0005667(transcription factor complex);GO:0006355(regulation of transcription, DNA-templated)	04261(Adrenergic signaling in cardiomyocytes)	K09052	NA
2	ENSDARG00000024211	ifng1	3.00176	1.35887	1.1434	0.317	0.133	3.95036e-15	1.09472e-10	interferon gamma 1 [Source:ZFIN;Acc:ZDB-GENE-040629-1]	GO:0005133(interferon-gamma receptor binding);GO:0005576(extracellular region);GO:0006955(immune response);GO:0009615(response to virus);GO:0030097(hemopoiesis);GO:0042742(defense response to bacterium);GO:0098508(endothelial to hematopoietic transition)	03050(Proteasome);04060(Cytokine-cytokine receptor interaction);04217(Necroptosis);04350(TGF-beta signaling pathway);05132(Salmonella infection);05168(Herpes simplex virus 1 infection)	K04687	NA
2	ENSDARG00000032103	mapk6	1.82453	1.3396	0.445722	0.263	0.272	4.63657e-15	1.28489e-10	mitogen-activated protein kinase 6 [Source:ZFIN;Acc:ZDB-GENE-050420-7]	GO:0000165(MAPK cascade);GO:0004672(protein kinase activity);GO:0004707(MAP kinase activity);GO:0005524(ATP binding);GO:0005634(nucleus);GO:0005737(cytoplasm);GO:0006468(protein phosphorylation);GO:0010468(regulation of gene expression);GO:0016301(kinase activity);GO:0016310(phosphorylation);GO:0035556(intracellular signal transduction);GO:0071310(cellular response to organic substance)	NA	K06855	EC:2.7.11.24
2	ENSDARG00000079808	si:ch73-208g10.1	3.35288	2.40498	0.47938	0.402	0.405	4.71164e-15	1.30569e-10	si:ch73-208g10.1 [Source:ZFIN;Acc:ZDB-GENE-040108-6]	GO:0016020(membrane);GO:0016021(integral component of membrane);GO:0098609(cell-cell adhesion)	NA	NA	NA
2	ENSDARG00000063219	ubap2l	1.51188	1.22701	0.301196	0.228	0.288	4.90494e-15	1.35926e-10	ubiquitin associated protein 2-like [Source:ZFIN;Acc:ZDB-GENE-060503-244]	GO:0005515(protein binding);GO:0005634(nucleus);GO:0005737(cytoplasm)	NA	NA	NA
[truncated: 8,978 more rows]

## Sheet: Average expression profile
Average expression profile of T/NK cell subset categories
[truncated: 19,228 more rows]
[truncated: 20 more columns]

## Sheet: Number and percentage of cells 
Number and percentage of cells in each subset of T/NK cells
[truncated: 4 more rows]
