# Supplementary material for: Single-cell RNA sequencing unveils the hidden powers of zebrafish kidney for generating both hematopoiesis and adaptive antiviral immunity
Source: eLife. 2024 Mar 18;13:RP92424. doi: 10.7554/eLife.92424 (PMC10948150; doi:10.7554/eLife.92424)
Supplement: Supplementary file 5. [file elife-92424-supp5.xlsx]

## Sheet: Marker gene list
Supplementary file 5. Marker gene list of B cell subsets
Target_Cluster	GeneID	GeneName	Target_Cluster_mean	Other_Cluster_mean	log2FC	Pvlaue	Qvalue	Description	GO	KEGG	KO_ENTRY	EC
0	ENSDARG00000099970	CR383676.1	272.197	224.741	0.276384	3.80287e-122	1.05385e-117	NA	NA	NA	NA	NA
0	ENSDARG00000074014	zgc:194275	34.4604	27.3229	0.334829	8.19015e-106	2.26965e-101	zgc:194275 [Source:ZFIN;Acc:ZDB-GENE-081022-92]	GO:0003674(molecular_function);GO:0005575(cellular_component);GO:0008150(biological_process)	NA	NA	NA
0	ENSDARG00000009087	cd74a	66.7252	51.3527	0.377793	9.74278e-106	2.69992e-101	CD74 molecule, major histocompatibility complex, class II invariant chain a [Source:ZFIN;Acc:ZDB-GENE-000901-1]	GO:0002286(T cell activation involved in immune response);GO:0002468(dendritic cell antigen processing and presentation);GO:0006886(intracellular protein transport);GO:0006955(immune response);GO:0009986(cell surface);GO:0016020(membrane);GO:0016021(integral component of membrane);GO:0019882(antigen processing and presentation);GO:0042289(MHC class II protein binding);GO:0048839(inner ear develop…	05168(Herpes simplex virus 1 infection)	K06505	NA
0	ENSDARG00000095908	sat1a.2	27.586	19.8699	0.473352	5.76806e-85	1.59845e-80	spermidine/spermine N1-acetyltransferase 1a, duplicate 2 [Source:ZFIN;Acc:ZDB-GENE-040704-4]	GO:0004145(diamine N-acetyltransferase activity);GO:0005515(protein binding);GO:0005575(cellular_component);GO:0008080(N-acetyltransferase activity);GO:0016740(transferase activity);GO:0019809(spermidine binding);GO:0032918(spermidine acetylation)	00330(Arginine and proline metabolism);04216(Ferroptosis)	K00657	EC:2.3.1.57
0	ENSDARG00000040439	rsl24d1	18.468	13.8919	0.410785	1.48558e-80	4.11684e-76	ribosomal L24 domain containing 1 [Source:ZFIN;Acc:ZDB-GENE-040426-1925]	GO:0000027(ribosomal large subunit assembly);GO:0003723(RNA binding);GO:0003735(structural constituent of ribosome);GO:0005634(nucleus);GO:0005730(nucleolus);GO:0006412(translation);GO:0022625(cytosolic large ribosomal subunit);GO:0042254(ribosome biogenesis);GO:1902626(assembly of large subunit precursor of preribosome)	03010(Ribosome)	K02896	NA
0	ENSDARG00000016255	chmp4ba	10.4829	6.87034	0.60959	3.83485e-77	1.06271e-72	charged multivesicular body protein 4Ba [Source:ZFIN;Acc:ZDB-GENE-040426-906]	GO:0007034(vacuolar transport)	04144(Endocytosis);04217(Necroptosis)	K12194	NA
0	ENSDARG00000024540	tspan36	10.694	7.79843	0.45554	4.39037e-75	1.21666e-70	tetraspanin 36 [Source:ZFIN;Acc:ZDB-GENE-040718-248]	GO:0000139(Golgi membrane);GO:0005783(endoplasmic reticulum);GO:0005789(endoplasmic reticulum membrane);GO:0005794(Golgi apparatus);GO:0005887(integral component of plasma membrane);GO:0007166(cell surface receptor signaling pathway);GO:0007275(multicellular organism development);GO:0016020(membrane);GO:0016021(integral component of membrane);GO:0043473(pigmentation)	NA	NA	NA
0	ENSDARG00000055186	ccr9a	21.8511	14.2937	0.612327	1.05375e-74	2.92015e-70	chemokine (C-C motif) receptor 9a [Source:ZFIN;Acc:ZDB-GENE-060130-125]	GO:0004930(G protein-coupled receptor activity);GO:0004950(chemokine receptor activity);GO:0006935(chemotaxis);GO:0006955(immune response);GO:0007165(signal transduction);GO:0007186(G protein-coupled receptor signaling pathway);GO:0007204(positive regulation of cytosolic calcium ion concentration);GO:0009897(external side of plasma membrane);GO:0016020(membrane);GO:0016021(integral component of m…	04060(Cytokine-cytokine receptor interaction);04672(Intestinal immune network for IgA production)	K04184	NA
0	ENSDARG00000022303	higd1a	10.5859	7.46935	0.503094	3.12332e-74	8.65534e-70	HIG1 hypoxia inducible domain family, member 1A [Source:ZFIN;Acc:ZDB-GENE-030826-15]	GO:0016020(membrane);GO:0016021(integral component of membrane)	NA	NA	NA
0	ENSDARG00000103980	ets2	7.10964	4.77112	0.575449	5.41585e-71	1.50084e-66	v-ets avian erythroblastosis virus E26 oncogene homolog 2 [Source:ZFIN;Acc:ZDB-GENE-050522-552]	GO:0000981(DNA-binding transcription factor activity, RNA polymerase II-specific);GO:0003677(DNA binding);GO:0003700(DNA-binding transcription factor activity);GO:0005634(nucleus);GO:0006355(regulation of transcription, DNA-templated);GO:0006357(regulation of transcription by RNA polymerase II);GO:0030154(cell differentiation);GO:0043565(sequence-specific DNA binding)	NA	K21932	NA
0	ENSDARG00000099624	chmp1b	3.85514	2.96933	0.376648	7.19326e-70	1.9934e-65	chromatin modifying protein 1B [Source:ZFIN;Acc:ZDB-GENE-030131-8370]	GO:0000815(ESCRT III complex);GO:0003674(molecular_function);GO:0005737(cytoplasm);GO:0005768(endosome);GO:0005771(multivesicular body);GO:0005829(cytosol);GO:0007034(vacuolar transport);GO:0015031(protein transport);GO:0016020(membrane);GO:0031902(late endosome membrane);GO:0032509(endosome transport via multivesicular body sorting pathway);GO:0045324(late endosome to vacuole transport)	04144(Endocytosis);04217(Necroptosis)	K12197	NA
0	ENSDARG00000068214	ccni	9.60197	7.15914	0.423545	1.16722e-69	3.23461e-65	cyclin I [Source:ZFIN;Acc:ZDB-GENE-040426-2898]	GO:0000079(regulation of cyclin-dependent protein serine/threonine kinase activity);GO:0000278(mitotic cell cycle);GO:0000307(cyclin-dependent protein kinase holoenzyme complex);GO:0003674(molecular_function);GO:0004672(protein kinase activity);GO:0005575(cellular_component);GO:0005634(nucleus);GO:0005737(cytoplasm);GO:0006468(protein phosphorylation);GO:0007088(regulation of mitotic nuclear divi…	NA	NA	NA
0	ENSDARG00000031683	fosab	9.12802	4.78932	0.930481	2.38465e-69	6.60835e-65	v-fos FBJ murine osteosarcoma viral oncogene homolog Ab [Source:ZFIN;Acc:ZDB-GENE-031222-4]	GO:0000978(RNA polymerase II proximal promoter sequence-specific DNA binding);GO:0003677(DNA binding);GO:0003690(double-stranded DNA binding);GO:0003700(DNA-binding transcription factor activity);GO:0005634(nucleus);GO:0005667(transcription factor complex);GO:0006355(regulation of transcription, DNA-templated);GO:0006357(regulation of transcription by RNA polymerase II);GO:0033555(multicellular o…	04010(MAPK signaling pathway);04210(Apoptosis);04620(Toll-like receptor signaling pathway);05132(Salmonella infection)	K04379	NA
0	ENSDARG00000053370	eif3jb	3.04339	2.40013	0.342565	2.05337e-68	5.69029e-64	eukaryotic translation initiation factor 3, subunit Jb [Source:ZFIN;Acc:ZDB-GENE-040426-2900]	GO:0001732(formation of cytoplasmic translation initiation complex);GO:0002183(cytoplasmic translational initiation);GO:0003743(translation initiation factor activity);GO:0005737(cytoplasm);GO:0005852(eukaryotic translation initiation factor 3 complex);GO:0006412(translation);GO:0006413(translational initiation);GO:0016282(eukaryotic 43S preinitiation complex);GO:0033290(eukaryotic 48S preinitiat…	03013(RNA transport)	K03245	NA
0	ENSDARG00000031776	fthl27	37.8014	27.1352	0.478271	3.24147e-65	8.98275e-61	ferritin, heavy polypeptide-like 27 [Source:ZFIN;Acc:ZDB-GENE-040718-72]	GO:0004322(ferroxidase activity);GO:0005506(iron ion binding);GO:0005737(cytoplasm);GO:0006826(iron ion transport);GO:0006879(cellular iron ion homeostasis);GO:0006880(intracellular sequestering of iron ion);GO:0008198(ferrous iron binding);GO:0008199(ferric iron binding);GO:0042802(identical protein binding);GO:0046872(metal ion binding);GO:0055114(oxidation-reduction process)	04216(Ferroptosis);04217(Necroptosis)	K00522	EC:1.16.3.2
0	ENSDARG00000098108	dusp2	49.5344	33.1208	0.580695	1.61391e-64	4.47246e-60	dual specificity phosphatase 2 [Source:ZFIN;Acc:ZDB-GENE-040801-188]	GO:0000188(inactivation of MAPK activity);GO:0004721(phosphoprotein phosphatase activity);GO:0004725(protein tyrosine phosphatase activity);GO:0005634(nucleus);GO:0005737(cytoplasm);GO:0006470(protein dephosphorylation);GO:0008138(protein tyrosine/serine/threonine phosphatase activity);GO:0016311(dephosphorylation);GO:0016787(hydrolase activity);GO:0016791(phosphatase activity);GO:0017017(MAP kin…	04010(MAPK signaling pathway)	K04459	3.1.3.48;EC:3.1.3.16
0	ENSDARG00000009390	npl	3.33046	2.19466	0.601721	4.09127e-64	1.13377e-59	N-acetylneuraminate pyruvate lyase (dihydrodipicolinate synthase) [Source:ZFIN;Acc:ZDB-GENE-030131-926]	GO:0003824(catalytic activity);GO:0016829(lyase activity)	00520(Amino sugar and nucleotide sugar metabolism)	K01639	EC:4.1.3.3
0	ENSDARG00000051888	ist1	2.33261	1.9099	0.288449	1.60572e-62	4.44976e-58	increased sodium tolerance 1 homolog (yeast) [Source:ZFIN;Acc:ZDB-GENE-030131-179]	GO:0003674(molecular_function);GO:0005575(cellular_component);GO:0007032(endosome organization);GO:0015031(protein transport);GO:0048675(axon extension)	04144(Endocytosis)	K19476	NA
0	ENSDARG00000022280	brd2a	9.44144	7.0382	0.4238	2.65644e-62	7.36153e-58	bromodomain containing 2a [Source:ZFIN;Acc:ZDB-GENE-990415-248]	GO:0002574(thrombocyte differentiation);GO:0003674(molecular_function);GO:0005515(protein binding);GO:0005575(cellular_component);GO:0021510(spinal cord development);GO:0030902(hindbrain development);GO:0030917(midbrain-hindbrain boundary development);GO:0042981(regulation of apoptotic process)	NA	K08871	NA
0	ENSDARG00000100515	dusp1	6.30721	4.03921	0.642928	5.47806e-60	1.51808e-55	dual specificity phosphatase 1 [Source:ZFIN;Acc:ZDB-GENE-040426-2018]	GO:0000188(inactivation of MAPK activity);GO:0004721(phosphoprotein phosphatase activity);GO:0004725(protein tyrosine phosphatase activity);GO:0005634(nucleus);GO:0005737(cytoplasm);GO:0006470(protein dephosphorylation);GO:0008138(protein tyrosine/serine/threonine phosphatase activity);GO:0016311(dephosphorylation);GO:0016787(hydrolase activity);GO:0016791(phosphatase activity);GO:0017017(MAP kin…	04010(MAPK signaling pathway)	K21278	3.1.3.48;EC:3.1.3.16
0	ENSDARG00000043154	ucp2	5.32484	3.84486	0.469809	1.62424e-59	4.50109e-55	uncoupling protein 2 [Source:ZFIN;Acc:ZDB-GENE-990708-8]	GO:0006839(mitochondrial transport);GO:0016020(membrane);GO:0016021(integral component of membrane);GO:0022857(transmembrane transporter activity);GO:0031966(mitochondrial membrane);GO:0055085(transmembrane transport)	NA	K15103	NA
0	ENSDARG00000057633	cxcr4a	14.0225	9.47181	0.566031	2.74669e-58	7.61164e-54	chemokine (C-X-C motif) receptor 4a [Source:ZFIN;Acc:ZDB-GENE-020102-1]	GO:0000902(cell morphogenesis);GO:0001570(vasculogenesis);GO:0001946(lymphangiogenesis);GO:0002040(sprouting angiogenesis);GO:0002042(cell migration involved in sprouting angiogenesis);GO:0004930(G protein-coupled receptor activity);GO:0004950(chemokine receptor activity);GO:0006935(chemotaxis);GO:0006955(immune response);GO:0007165(signal transduction);GO:0007186(G protein-coupled receptor signa…	04020(Calcium signaling pathway);04060(Cytokine-cytokine receptor interaction);04144(Endocytosis);04672(Intestinal immune network for IgA production);04810(Regulation of actin cytoskeleton)	K04189	NA
0	ENSDARG00000007836	ctsla	7.18421	4.19713	0.775426	2.87791e-58	7.97526e-54	cathepsin La [Source:ZFIN;Acc:ZDB-GENE-030131-106]	GO:0004197(cysteine-type endopeptidase activity);GO:0005615(extracellular space);GO:0005764(lysosome);GO:0006508(proteolysis);GO:0008233(peptidase activity);GO:0008234(cysteine-type peptidase activity);GO:0016787(hydrolase activity);GO:0051603(proteolysis involved in cellular protein catabolic process)	04140(Autophagy - animal);04142(Lysosome);04145(Phagosome);04210(Apoptosis)	K01365	EC:3.4.22.15
0	ENSDARG00000009505	prelid3b	5.02621	4.17135	0.268956	6.97225e-57	1.93215e-52	PRELI domain containing 3 [Source:ZFIN;Acc:ZDB-GENE-031002-13]	GO:0005758(mitochondrial intermembrane space);GO:0015914(phospholipid transport);GO:1990050(phosphatidic acid transporter activity)	NA	NA	NA
0	ENSDARG00000053291	pnrc2	28.5917	22.588	0.340042	3.63059e-56	1.00611e-51	proline-rich nuclear receptor coactivator 2 [Source:ZFIN;Acc:ZDB-GENE-030131-5475]	GO:0000184(nuclear-transcribed mRNA catabolic process, nonsense-mediated decay);GO:0000932(P-body);GO:0000956(nuclear-transcribed mRNA catabolic process);GO:0005634(nucleus);GO:0005737(cytoplasm)	NA	K18751	NA
0	ENSDARG00000057491	n4bp1	4.35075	3.33827	0.382161	5.42364e-56	1.503e-51	nedd4 binding protein 1 [Source:ZFIN;Acc:ZDB-GENE-030131-5538]	GO:0003723(RNA binding);GO:0005634(nucleus);GO:0005730(nucleolus);GO:0016605(PML body);GO:0031397(negative regulation of protein ubiquitination);GO:0032435(negative regulation of proteasomal ubiquitin-dependent protein catabolic process)	NA	NA	NA
0	ENSDARG00000042725	cebpb	14.9116	9.59883	0.635503	5.45408e-55	1.51143e-50	CCAAT enhancer binding protein beta [Source:ZFIN;Acc:ZDB-GENE-020111-3]	GO:0001878(response to yeast);GO:0003677(DNA binding);GO:0003700(DNA-binding transcription factor activity);GO:0005634(nucleus);GO:0006355(regulation of transcription, DNA-templated);GO:0009617(response to bacterium);GO:0044030(regulation of DNA methylation)	NA	K10048	NA
0	ENSDARG00000076223	SERP1	2.56565	2.09303	0.293734	6.49568e-55	1.80008e-50	zgc:92744 [Source:ZFIN;Acc:ZDB-GENE-040718-312]	GO:0003674(molecular_function);GO:0005783(endoplasmic reticulum);GO:0005789(endoplasmic reticulum membrane);GO:0006486(protein glycosylation);GO:0015031(protein transport);GO:0016020(membrane);GO:0016021(integral component of membrane);GO:0030968(endoplasmic reticulum unfolded protein response);GO:0071391(cellular response to estrogen stimulus)	NA	NA	NA
0	ENSDARG00000020298	btg2	9.02797	6.37378	0.502252	4.28509e-54	1.18749e-49	B-cell translocation gene 2 [Source:ZFIN;Acc:ZDB-GENE-000210-15]	GO:0005634(nucleus);GO:0005737(cytoplasm);GO:0008285(negative regulation of cell population proliferation);GO:0045930(negative regulation of mitotic cell cycle)	03018(RNA degradation)	K14443	NA
0	ENSDARG00000003017	ube2al	1.81699	1.50742	0.269466	7.98067e-53	2.2116e-48	ubiquitin conjugating enzyme E2 A, like [Source:ZFIN;Acc:ZDB-GENE-030131-4195]	GO:0000166(nucleotide binding);GO:0000209(protein polyubiquitination);GO:0000790(nuclear chromatin);GO:0005524(ATP binding);GO:0006281(DNA repair);GO:0016740(transferase activity);GO:0033503(HULC complex);GO:0043161(proteasome-mediated ubiquitin-dependent protein catabolic process);GO:0061631(ubiquitin conjugating enzyme activity)	04120(Ubiquitin mediated proteolysis)	K10573	EC:2.3.2.23
0	ENSDARG00000075014	sqstm1	5.03587	3.51602	0.5183	9.23136e-53	2.55819e-48	sequestosome 1 [Source:ZFIN;Acc:ZDB-GENE-040426-2204]	GO:0000423(mitophagy);GO:0005080(protein kinase C binding);GO:0005515(protein binding);GO:0005776(autophagosome);GO:0007005(mitochondrion organization);GO:0007032(endosome organization);GO:0007409(axonogenesis);GO:0007626(locomotory behavior);GO:0008270(zinc ion binding);GO:0010506(regulation of autophagy);GO:0016235(aggresome);GO:0035973(aggrephagy);GO:0044753(amphisome);GO:0046872(metal ion bin…	04137(Mitophagy - animal);04217(Necroptosis);04218(Cellular senescence)	K14381	NA
0	ENSDARG00000035676	ptp4a2b	3.63496	3.00562	0.274276	9.37133e-53	2.59698e-48	protein tyrosine phosphatase type IVA, member 2b [Source:ZFIN;Acc:ZDB-GENE-041114-111]	GO:0004725(protein tyrosine phosphatase activity);GO:0005634(nucleus);GO:0005737(cytoplasm);GO:0006470(protein dephosphorylation);GO:0008138(protein tyrosine/serine/threonine phosphatase activity);GO:0016311(dephosphorylation);GO:0016791(phosphatase activity);GO:0035335(peptidyl-tyrosine dephosphorylation)	NA	K18041	EC:3.1.3.48
0	ENSDARG00000022315	atp6v1g1	1.81339	1.50932	0.264795	2.79355e-52	7.74148e-48	ATPase H+ transporting V1 subunit G1 [Source:ZFIN;Acc:ZDB-GENE-030131-6965]	GO:0006811(ion transport);GO:0008553(proton-exporting ATPase activity, phosphorylative mechanism);GO:0016471(vacuolar proton-transporting V-type ATPase complex);GO:0042626(ATPase activity, coupled to transmembrane movement of substances);GO:1902600(proton transmembrane transport)	00190(Oxidative phosphorylation);04145(Phagosome);04150(mTOR signaling pathway)	K02152	NA
0	ENSDARG00000036482	hexim1	1.64939	1.36866	0.269169	1.01424e-51	2.81067e-47	HEXIM P-TEFb complex subunit 1 [Source:ZFIN;Acc:ZDB-GENE-030131-4637]	GO:0000122(negative regulation of transcription by RNA polymerase II);GO:0004861(cyclin-dependent protein serine/threonine kinase inhibitor activity);GO:0005634(nucleus);GO:0005737(cytoplasm);GO:0017069(snRNA binding);GO:0045736(negative regulation of cyclin-dependent protein serine/threonine kinase activity)	NA	K15189	NA
0	ENSDARG00000002758	dedd1	2.30846	1.80334	0.356257	1.80432e-51	5.00013e-47	death effector domain-containing 1 [Source:ZFIN;Acc:ZDB-GENE-000616-2]	GO:0003677(DNA binding);GO:0005515(protein binding);GO:0005730(nucleolus);GO:0006915(apoptotic process);GO:0008625(extrinsic apoptotic signaling pathway via death domain receptors);GO:0042981(regulation of apoptotic process)	NA	NA	NA
0	ENSDARG00000007708	nsa2	8.95846	7.27013	0.301269	2.99267e-51	8.2933e-47	NSA2 ribosome biogenesis homolog (S. cerevisiae) [Source:ZFIN;Acc:ZDB-GENE-030131-488]	GO:0030687(preribosome, large subunit precursor)	NA	K14842	NA
0	ENSDARG00000018961	gtpbp4	4.62398	3.83219	0.270966	5.56028e-51	1.54087e-46	GTP binding protein 4 [Source:ZFIN;Acc:ZDB-GENE-030131-5982]	GO:0005525(GTP binding);GO:0005634(nucleus);GO:0005730(nucleolus);GO:0042254(ribosome biogenesis)	03008(Ribosome biogenesis in eukaryotes)	K06943	NA
0	ENSDARG00000061368	klf13	2.21526	1.63885	0.434798	1.44688e-50	4.0096e-46	Kruppel-like factor 13 [Source:ZFIN;Acc:ZDB-GENE-060929-1274]	GO:0000981(DNA-binding transcription factor activity, RNA polymerase II-specific);GO:0003676(nucleic acid binding);GO:0005634(nucleus);GO:0006357(regulation of transcription by RNA polymerase II)	NA	K09208	NA
0	ENSDARG00000056141	coq10b	2.23252	1.79258	0.316634	4.32976e-50	1.19986e-45	coenzyme Q10B [Source:ZFIN;Acc:ZDB-GENE-050417-263]	NA	NA	K18588	NA
0	ENSDARG00000104999	CT027980.1	3.73249	2.92647	0.350979	4.95385e-50	1.37281e-45	NA	NA	NA	NA	NA
0	ENSDARG00000079553	cd83	15.7861	11.5828	0.446672	6.51037e-50	1.80415e-45	CD83 molecule [Source:ZFIN;Acc:ZDB-GENE-060503-762]	GO:0002286(T cell activation involved in immune response);GO:0002468(dendritic cell antigen processing and presentation);GO:0009986(cell surface);GO:0016020(membrane);GO:0016021(integral component of membrane);GO:0071753(IgM immunoglobulin complex)	NA	K06510	NA
0	ENSDARG00000099195	ier2a	3.86626	2.89599	0.416881	1.12767e-49	3.125e-45	immediate early response 2a [Source:ZFIN;Acc:ZDB-GENE-030131-9126]	NA	NA	NA	NA
0	ENSDARG00000069461	rnaseka	1.93	1.59705	0.273191	1.38835e-49	3.84739e-45	ribonuclease, RNase K a [Source:ZFIN;Acc:ZDB-GENE-060825-301]	GO:0004518(nuclease activity);GO:0004519(endonuclease activity);GO:0004521(endoribonuclease activity);GO:0005575(cellular_component);GO:0016020(membrane);GO:0016021(integral component of membrane);GO:0016787(hydrolase activity);GO:0090305(nucleic acid phosphodiester bond hydrolysis);GO:0090502(RNA phosphodiester bond hydrolysis, endonucleolytic)	NA	NA	NA
0	ENSDARG00000013771	ctss2.2	4.07765	3.09087	0.399727	2.59057e-49	7.17898e-45	cathepsin S, ortholog 2, tandem duplicate 2 [Source:ZFIN;Acc:ZDB-GENE-050626-55]	GO:0004197(cysteine-type endopeptidase activity);GO:0005615(extracellular space);GO:0005764(lysosome);GO:0006508(proteolysis);GO:0008233(peptidase activity);GO:0008234(cysteine-type peptidase activity);GO:0016787(hydrolase activity);GO:0051603(proteolysis involved in cellular protein catabolic process)	04142(Lysosome);04145(Phagosome);04210(Apoptosis)	K01368	EC:3.4.22.27
0	ENSDARG00000086881	ier2b	5.33378	3.31686	0.685342	7.11753e-49	1.97241e-44	immediate early response 2b [Source:ZFIN;Acc:ZDB-GENE-030131-8244]	NA	NA	NA	NA
0	ENSDARG00000004078	acsl4a	2.08075	1.64241	0.341288	9.53494e-49	2.64232e-44	acyl-CoA synthetase long chain family member 4a [Source:ZFIN;Acc:ZDB-GENE-040426-1565]	GO:0003824(catalytic activity);GO:0009953(dorsal/ventral pattern formation);GO:0016020(membrane);GO:0016021(integral component of membrane);GO:0030513(positive regulation of BMP signaling pathway);GO:0051896(regulation of protein kinase B signaling);GO:1900744(regulation of p38MAPK cascade)	00061(Fatty acid biosynthesis);00071(Fatty acid degradation);03320(PPAR signaling pathway);04146(Peroxisome);04216(Ferroptosis);04920(Adipocytokine signaling pathway)	K01897	EC:6.2.1.3
0	ENSDARG00000042824	nfe2l2a	2.06139	1.65346	0.318125	3.84726e-48	1.06615e-43	nuclear factor, erythroid 2-like 2a [Source:ZFIN;Acc:ZDB-GENE-030723-2]	GO:0000976(transcription regulatory region sequence-specific DNA binding);GO:0003677(DNA binding);GO:0003700(DNA-binding transcription factor activity);GO:0005634(nucleus);GO:0005667(transcription factor complex);GO:0005737(cytoplasm);GO:0006355(regulation of transcription, DNA-templated);GO:0006979(response to oxidative stress);GO:0034599(cellular response to oxidative stress);GO:0045893(positiv…	04141(Protein processing in endoplasmic reticulum)	K05638	NA
0	ENSDARG00000036588	mhc1zba	4.7478	3.89261	0.286523	4.1305e-48	1.14464e-43	major histocompatibility complex class I ZBA [Source:ZFIN;Acc:ZDB-GENE-040426-2149]	GO:0016020(membrane);GO:0016021(integral component of membrane)	NA	NA	NA
0	ENSDARG00000053979	chmp2a	4.70586	3.80447	0.306762	9.12195e-48	2.52787e-43	charged multivesicular body protein 2A [Source:ZFIN;Acc:ZDB-GENE-040426-2922]	GO:0007034(vacuolar transport)	04144(Endocytosis);04217(Necroptosis)	K12191	NA
0	ENSDARG00000007323	chmp4bb	2.99357	2.35271	0.34754	9.53451e-48	2.6422e-43	charged multivesicular body protein 4Bb [Source:ZFIN;Acc:ZDB-GENE-040426-2812]	GO:0005737(cytoplasm);GO:0005768(endosome);GO:0005829(cytosol);GO:0007034(vacuolar transport);GO:0009838(abscission);GO:0015031(protein transport);GO:0016020(membrane);GO:0031902(late endosome membrane);GO:0032466(negative regulation of cytokinesis);GO:0044878(mitotic cytokinesis checkpoint)	04144(Endocytosis);04217(Necroptosis)	K12194	NA
0	ENSDARG00000074656	ctss2.1	8.08638	5.5131	0.55263	1.02931e-46	2.85242e-42	cathepsin S, ortholog2, tandem duplicate 1 [Source:ZFIN;Acc:ZDB-GENE-050522-559]	GO:0004197(cysteine-type endopeptidase activity);GO:0005615(extracellular space);GO:0005764(lysosome);GO:0006508(proteolysis);GO:0008233(peptidase activity);GO:0008234(cysteine-type peptidase activity);GO:0016787(hydrolase activity);GO:0051603(proteolysis involved in cellular protein catabolic process)	04142(Lysosome);04145(Phagosome);04210(Apoptosis)	K01368	EC:3.4.22.27
0	ENSDARG00000101251	ldha	9.56966	7.3117	0.388261	1.56284e-46	4.33094e-42	lactate dehydrogenase A4 [Source:ZFIN;Acc:ZDB-GENE-991026-5]	GO:0001666(response to hypoxia);GO:0003824(catalytic activity);GO:0004459(L-lactate dehydrogenase activity);GO:0005737(cytoplasm);GO:0005975(carbohydrate metabolic process);GO:0016491(oxidoreductase activity);GO:0016616(oxidoreductase activity, acting on the CH-OH group of donors, NAD or NADP as acceptor);GO:0019752(carboxylic acid metabolic process);GO:0055114(oxidation-reduction process)	00010(Glycolysis / Gluconeogenesis);00270(Cysteine and methionine metabolism);00620(Pyruvate metabolism);00640(Propanoate metabolism)	K00016	EC:1.1.1.27
0	ENSDARG00000043003	pcyt2	1.38371	1.11138	0.31619	2.0725e-46	5.74332e-42	phosphate cytidylyltransferase 2, ethanolamine [Source:ZFIN;Acc:ZDB-GENE-041010-132]	GO:0003824(catalytic activity);GO:0005575(cellular_component);GO:0009058(biosynthetic process)	00440(Phosphonate and phosphinate metabolism);00564(Glycerophospholipid metabolism)	K00967	EC:2.7.7.14
0	ENSDARG00000101034	si:dkey-206d17.12	3.69523	2.89532	0.351941	2.15519e-46	5.97247e-42	si:dkey-206d17.12 [Source:ZFIN;Acc:ZDB-GENE-081031-82]	GO:0046872(metal ion binding)	NA	K18668	EC:3.1.-.-
0	ENSDARG00000002369	UBB	4.44752	3.64831	0.285775	8.4162e-46	2.3323e-41	si:ch211-202a12.4 [Source:ZFIN;Acc:ZDB-GENE-030131-8486]	GO:0005515(protein binding);GO:0005634(nucleus);GO:0005737(cytoplasm);GO:0016567(protein ubiquitination);GO:0019941(modification-dependent protein catabolic process);GO:0031386(protein tag);GO:0031625(ubiquitin protein ligase binding)	NA	NA	NA
0	ENSDARG00000020133	jdp2b	3.46958	2.05498	0.755634	8.54483e-46	2.36794e-41	Jun dimerization protein 2b [Source:ZFIN;Acc:ZDB-GENE-040718-197]	GO:0000978(RNA polymerase II proximal promoter sequence-specific DNA binding);GO:0003677(DNA binding);GO:0003700(DNA-binding transcription factor activity);GO:0005634(nucleus);GO:0006355(regulation of transcription, DNA-templated);GO:0006357(regulation of transcription by RNA polymerase II)	NA	K09033	NA
0	ENSDARG00000010641	slc20a1b	1.93319	1.53673	0.331115	2.00319e-45	5.55125e-41	solute carrier family 20 (phosphate transporter), member 1b [Source:ZFIN;Acc:ZDB-GENE-030131-260]	GO:0005315(inorganic phosphate transmembrane transporter activity);GO:0006817(phosphate ion transport);GO:0016020(membrane);GO:0016021(integral component of membrane);GO:0055085(transmembrane transport)	NA	K14640	NA
0	ENSDARG00000075818	dok2	1.57755	1.26834	0.31475	2.13453e-45	5.9152e-41	docking protein 2 [Source:ZFIN;Acc:ZDB-GENE-080721-4]	GO:0060319(primitive erythrocyte differentiation)	NA	NA	NA
0	ENSDARG00000007795	cst3	1.62026	1.31295	0.303418	2.48598e-45	6.88915e-41	cystatin C (amyloid angiopathy and cerebral hemorrhage) [Source:ZFIN;Acc:ZDB-GENE-030131-373]	GO:0004869(cysteine-type endopeptidase inhibitor activity);GO:0005615(extracellular space);GO:0010466(negative regulation of peptidase activity);GO:0010951(negative regulation of endopeptidase activity);GO:0030414(peptidase inhibitor activity)	NA	K13899	NA
0	ENSDARG00000011122	pptc7a	2.10635	1.62879	0.370945	2.00299e-44	5.55069e-40	PTC7 protein phosphatase homolog a [Source:ZFIN;Acc:ZDB-GENE-041114-74]	GO:0003824(catalytic activity)	NA	K17508	EC:3.1.3.16
0	ENSDARG00000100020	pim1	6.27109	4.74475	0.402383	2.03548e-44	5.64071e-40	Pim-1 proto-oncogene, serine/threonine kinase [Source:ZFIN;Acc:ZDB-GENE-061013-139]	GO:0000166(nucleotide binding);GO:0004672(protein kinase activity);GO:0004674(protein serine/threonine kinase activity);GO:0005524(ATP binding);GO:0005737(cytoplasm);GO:0006468(protein phosphorylation);GO:0007634(optokinetic behavior);GO:0016301(kinase activity);GO:0016310(phosphorylation);GO:0016740(transferase activity);GO:0043066(negative regulation of apoptotic process);GO:0046777(protein aut…	04933(AGE-RAGE signaling pathway in diabetic complications)	K04702	EC:2.7.11.1
0	ENSDARG00000012688	eif1b	9.9077	7.7195	0.360044	5.72595e-44	1.58678e-39	eukaryotic translation initiation factor 1B [Source:ZFIN;Acc:ZDB-GENE-030131-956]	GO:0003723(RNA binding);GO:0003743(translation initiation factor activity);GO:0006413(translational initiation);GO:0016282(eukaryotic 43S preinitiation complex);GO:0043024(ribosomal small subunit binding)	03013(RNA transport)	K03113	NA
0	ENSDARG00000040623	fosl2	4.09314	3.13647	0.384064	9.12726e-44	2.52935e-39	fos-like antigen 2 [Source:ZFIN;Acc:ZDB-GENE-070209-164]	GO:0000978(RNA polymerase II proximal promoter sequence-specific DNA binding);GO:0003677(DNA binding);GO:0003700(DNA-binding transcription factor activity);GO:0005634(nucleus);GO:0006355(regulation of transcription, DNA-templated);GO:0006357(regulation of transcription by RNA polymerase II);GO:2000690(regulation of cardiac muscle cell myoblast differentiation)	NA	K09030	NA
0	ENSDARG00000029072	klf6a	4.2702	3.11687	0.454208	2.82427e-43	7.82662e-39	Kruppel-like factor 6a [Source:ZFIN;Acc:ZDB-GENE-021115-9]	GO:0000122(negative regulation of transcription by RNA polymerase II);GO:0000785(chromatin);GO:0000981(DNA-binding transcription factor activity, RNA polymerase II-specific);GO:0001158(enhancer sequence-specific DNA binding);GO:0001227(DNA-binding transcription repressor activity, RNA polymerase II-specific);GO:0001889(liver development);GO:0003676(nucleic acid binding);GO:0003682(chromatin bindi…	NA	K09207	NA
0	ENSDARG00000055162	zhx2a	1.68582	1.40512	0.262759	4.17914e-43	1.15812e-38	zinc fingers and homeoboxes 2a [Source:ZFIN;Acc:ZDB-GENE-031107-2]	GO:0000122(negative regulation of transcription by RNA polymerase II);GO:0003676(nucleic acid binding);GO:0003677(DNA binding);GO:0003700(DNA-binding transcription factor activity);GO:0003714(transcription corepressor activity);GO:0005634(nucleus)	NA	NA	NA
0	ENSDARG00000009881	ier5	4.59486	3.76566	0.287115	6.22827e-43	1.72598e-38	immediate early response 5 [Source:ZFIN;Acc:ZDB-GENE-030616-127]	GO:0003674(molecular_function);GO:0005575(cellular_component);GO:0008150(biological_process)	NA	NA	NA
0	ENSDARG00000088087	kdm6ba	14.1528	11.5187	0.297113	1.66199e-42	4.60571e-38	lysine (K)-specific demethylase 6B, a [Source:ZFIN;Acc:ZDB-GENE-091005-1]	GO:0000978(RNA polymerase II proximal promoter sequence-specific DNA binding);GO:0003682(chromatin binding);GO:0005634(nucleus);GO:0007507(heart development);GO:0031490(chromatin DNA binding);GO:0043565(sequence-specific DNA binding);GO:0044666(MLL3/4 complex);GO:0046872(metal ion binding);GO:0061384(heart trabecula morphogenesis);GO:0071557(histone H3-K27 demethylation);GO:0071558(histone demeth…	NA	K11448	EC:1.14.11.-
0	ENSDARG00000018524	midn	1.13195	0.939259	0.269221	2.41303e-42	6.687e-38	midnolin [Source:ZFIN;Acc:ZDB-GENE-030131-2433]	GO:0005515(protein binding);GO:0005634(nucleus);GO:0005730(nucleolus);GO:0005737(cytoplasm);GO:0005829(cytosol)	NA	NA	NA
0	ENSDARG00000019160	sh3bp5la	2.89193	2.11524	0.45121	4.62846e-42	1.28264e-37	SH3-binding domain protein 5-like, a [Source:ZFIN;Acc:ZDB-GENE-040426-2187]	GO:0004860(protein kinase inhibitor activity);GO:0005737(cytoplasm);GO:0035556(intracellular signal transduction);GO:0061099(negative regulation of protein tyrosine kinase activity)	NA	NA	NA
0	ENSDARG00000074287	sptlc2b	3.06643	2.22566	0.462325	1.786e-41	4.94936e-37	serine palmitoyltransferase, long chain base subunit 2b [Source:ZFIN;Acc:ZDB-GENE-080305-8]	GO:0003824(catalytic activity);GO:0009058(biosynthetic process);GO:0016020(membrane);GO:0016021(integral component of membrane);GO:0016740(transferase activity);GO:0030170(pyridoxal phosphate binding)	00600(Sphingolipid metabolism)	K00654	EC:2.3.1.50
0	ENSDARG00000010572	slc25a25a	1.60264	1.26565	0.340572	3.23329e-41	8.96008e-37	solute carrier family 25 (mitochondrial carrier; phosphate carrier), member 25a [Source:ZFIN;Acc:ZDB-GENE-040426-2396]	GO:0005347(ATP transmembrane transporter activity);GO:0005509(calcium ion binding);GO:0005739(mitochondrion);GO:0005743(mitochondrial inner membrane);GO:0015867(ATP transport);GO:0016020(membrane);GO:0016021(integral component of membrane);GO:0022857(transmembrane transporter activity);GO:0046872(metal ion binding);GO:0055085(transmembrane transport)	NA	K14684	NA
0	ENSDARG00000056378	ifi30	6.2063	4.73746	0.389619	4.99911e-41	1.38535e-36	interferon, gamma-inducible protein 30 [Source:ZFIN;Acc:ZDB-GENE-030131-8447]	GO:0002376(immune system process);GO:0005576(extracellular region);GO:0005764(lysosome);GO:0016491(oxidoreductase activity);GO:0047134(protein-disulfide reductase activity);GO:0055114(oxidation-reduction process)	NA	NA	NA
0	ENSDARG00000012499	per1b	1.15688	0.942505	0.295662	7.55289e-41	2.09306e-36	period circadian clock 1b [Source:ZFIN;Acc:ZDB-GENE-040419-1]	GO:0000122(negative regulation of transcription by RNA polymerase II);GO:0000976(transcription regulatory region sequence-specific DNA binding);GO:0001222(transcription corepressor binding);GO:0005515(protein binding);GO:0005634(nucleus);GO:0005737(cytoplasm);GO:0007601(visual perception);GO:0008134(transcription factor binding);GO:0009266(response to temperature stimulus);GO:0009416(response to …	NA	K21944	NA
0	ENSDARG00000075666	tsc22d3	2.85351	2.27292	0.328189	1.46438e-40	4.05809e-36	TSC22 domain family, member 3 [Source:ZFIN;Acc:ZDB-GENE-040426-1433]	GO:0003700(DNA-binding transcription factor activity);GO:0006355(regulation of transcription, DNA-templated);GO:0007420(brain development);GO:0009953(dorsal/ventral pattern formation);GO:0030513(positive regulation of BMP signaling pathway)	NA	NA	NA
0	ENSDARG00000079105	mhc2dab	8.49207	6.45875	0.394862	4.76066e-40	1.31927e-35	major histocompatibility complex class II DAB gene [Source:ZFIN;Acc:ZDB-GENE-980526-200]	GO:0003674(molecular_function);GO:0006955(immune response);GO:0016020(membrane);GO:0016021(integral component of membrane);GO:0019882(antigen processing and presentation);GO:0042613(MHC class II protein complex)	04145(Phagosome);04514(Cell adhesion molecules (CAMs));04672(Intestinal immune network for IgA production);05168(Herpes simplex virus 1 infection)	K06752	NA
0	ENSDARG00000039096	si:dkey-24p1.1	2.70964	2.26038	0.261536	2.27829e-39	6.31358e-35	si:dkey-24p1.1 [Source:ZFIN;Acc:ZDB-GENE-060503-631]	GO:0016020(membrane);GO:0016021(integral component of membrane)	04514(Cell adhesion molecules (CAMs))	K06467	NA
0	ENSDARG00000002131	celf2	1.90058	1.56465	0.280599	2.742e-39	7.59862e-35	cugbp, Elav-like family member 2 [Source:ZFIN;Acc:ZDB-GENE-030826-35]	GO:0000381(regulation of alternative mRNA splicing, via spliceosome);GO:0003676(nucleic acid binding);GO:0003723(RNA binding);GO:0003729(mRNA binding);GO:0005634(nucleus);GO:0005737(cytoplasm);GO:0006376(mRNA splice site selection);GO:0006397(mRNA processing);GO:1990904(ribonucleoprotein complex)	NA	K13207	NA
0	ENSDARG00000044562	cycsb	8.99598	7.32446	0.296558	3.60926e-39	1.0002e-34	cytochrome c, somatic b [Source:ZFIN;Acc:ZDB-GENE-040625-38]	GO:0005739(mitochondrion);GO:0005758(mitochondrial intermembrane space);GO:0006122(mitochondrial electron transport, ubiquinol to cytochrome c);GO:0006123(mitochondrial electron transport, cytochrome c to oxygen);GO:0009055(electron transfer activity);GO:0020037(heme binding);GO:0046872(metal ion binding);GO:0055114(oxidation-reduction process);GO:0070469(respirasome)	04115(p53 signaling pathway);04210(Apoptosis);05168(Herpes simplex virus 1 infection)	K08738	NA
0	ENSDARG00000017653	rgs13	10.7673	8.378	0.361979	3.68067e-39	1.01999e-34	regulator of G protein signaling 13 [Source:ZFIN;Acc:ZDB-GENE-070410-138]	NA	NA	K16449	NA
0	ENSDARG00000067850	jund	3.18633	2.22043	0.521061	4.86847e-39	1.34915e-34	JunD proto-oncogene, AP-1 transcription factor subunit [Source:ZFIN;Acc:ZDB-GENE-070725-2]	GO:0000122(negative regulation of transcription by RNA polymerase II);GO:0000790(nuclear chromatin);GO:0000978(RNA polymerase II proximal promoter sequence-specific DNA binding);GO:0000981(DNA-binding transcription factor activity, RNA polymerase II-specific);GO:0003677(DNA binding);GO:0003700(DNA-binding transcription factor activity);GO:0003713(transcription coactivator activity);GO:0005634(nuc…	04010(MAPK signaling pathway)	K04449	NA
0	ENSDARG00000087732	RF00017	3.55107	2.49575	0.508779	5.44669e-39	1.50939e-34	NA	NA	NA	NA	NA
0	ENSDARG00000055124	ccnl1a	1.12883	0.934246	0.272958	1.09842e-38	3.04393e-34	cyclin L1a [Source:ZFIN;Acc:ZDB-GENE-050419-206]	GO:0000079(regulation of cyclin-dependent protein serine/threonine kinase activity);GO:0005634(nucleus);GO:0006355(regulation of transcription, DNA-templated);GO:0006357(regulation of transcription by RNA polymerase II);GO:0006396(RNA processing);GO:0016538(cyclin-dependent protein serine/threonine kinase regulator activity)	NA	NA	NA
0	ENSDARG00000029036	rab32a	2.30245	1.77132	0.378349	2.23532e-38	6.19453e-34	RAB32a, member RAS oncogene family [Source:ZFIN;Acc:ZDB-GENE-031006-10]	GO:0003924(GTPase activity);GO:0005525(GTP binding);GO:0005739(mitochondrion);GO:0005794(Golgi apparatus);GO:0005802(trans-Golgi network);GO:0006886(intracellular protein transport);GO:0016192(vesicle-mediated transport);GO:0031982(vesicle);GO:0032482(Rab protein signal transduction);GO:0042470(melanosome);GO:0060036(notochord cell vacuolation)	NA	K07918	NA
0	ENSDARG00000035400	btf3	19.7208	16.4104	0.265102	3.00214e-37	8.31953e-33	basic transcription factor 3 [Source:ZFIN;Acc:ZDB-GENE-030131-8731]	NA	NA	NA	NA
0	ENSDARG00000041959	cxcr4b	37.52	29.0611	0.368573	3.79944e-37	1.0529e-32	chemokine (C-X-C motif), receptor 4b [Source:ZFIN;Acc:ZDB-GENE-010614-1]	GO:0001637(G protein-coupled chemoattractant receptor activity);GO:0001667(ameboidal-type cell migration);GO:0001764(neuron migration);GO:0004930(G protein-coupled receptor activity);GO:0004950(chemokine receptor activity);GO:0005886(plasma membrane);GO:0006935(chemotaxis);GO:0006955(immune response);GO:0007165(signal transduction);GO:0007186(G protein-coupled receptor signaling pathway);GO:00072…	04020(Calcium signaling pathway);04060(Cytokine-cytokine receptor interaction);04144(Endocytosis);04672(Intestinal immune network for IgA production);04810(Regulation of actin cytoskeleton)	K04189	NA
0	ENSDARG00000026582	iscub	0.96507	0.798399	0.273523	4.82906e-37	1.33823e-32	iron-sulfur cluster assembly enzyme b [Source:ZFIN;Acc:ZDB-GENE-050417-332]	GO:0005506(iron ion binding);GO:0005737(cytoplasm);GO:0005759(mitochondrial matrix);GO:0006879(cellular iron ion homeostasis);GO:0008198(ferrous iron binding);GO:0016226(iron-sulfur cluster assembly);GO:0051536(iron-sulfur cluster binding);GO:0051537(2 iron, 2 sulfur cluster binding);GO:0051539(4 iron, 4 sulfur cluster binding)	NA	K22068	NA
0	ENSDARG00000039535	dapp1	3.06385	2.54845	0.26573	1.74768e-36	4.84318e-32	dual adaptor of phosphotyrosine and 3-phosphoinositides [Source:ZFIN;Acc:ZDB-GENE-050417-180]	GO:0005737(cytoplasm);GO:0016020(membrane);GO:0030165(PDZ domain binding)	NA	NA	NA
0	ENSDARG00000063050	rc3h2	2.0548	1.64024	0.325093	9.23867e-36	2.56022e-31	ring finger and CCCH-type domains 2 [Source:ZFIN;Acc:ZDB-GENE-060503-694]	GO:0003729(mRNA binding);GO:0004842(ubiquitin-protein transferase activity);GO:0010608(posttranscriptional regulation of gene expression);GO:0016567(protein ubiquitination);GO:0046872(metal ion binding)	NA	K15690	NA
0	ENSDARG00000095019	lmo2	2.64369	2.12684	0.313843	2.7231e-35	7.54627e-31	LIM domain only 2 (rhombotin-like 1) [Source:ZFIN;Acc:ZDB-GENE-980526-419]	GO:0001568(blood vessel development);GO:0001935(endothelial cell proliferation);GO:0003677(DNA binding);GO:0005634(nucleus);GO:0007275(multicellular organism development);GO:0030097(hemopoiesis);GO:0030218(erythrocyte differentiation);GO:0031101(fin regeneration);GO:0032991(protein-containing complex);GO:0035162(embryonic hemopoiesis);GO:0046872(metal ion binding);GO:0048821(erythrocyte developme…	NA	NA	NA
0	ENSDARG00000035990	cited4a	4.58626	3.56311	0.364179	2.92901e-35	8.11689e-31	Cbp/p300-interacting transactivator, with Glu/Asp-rich carboxy-terminal domain, 4a [Source:ZFIN;Acc:ZDB-GENE-030131-7661]	GO:0003713(transcription coactivator activity);GO:0005634(nucleus);GO:0006355(regulation of transcription, DNA-templated);GO:0006357(regulation of transcription by RNA polymerase II);GO:1903508(positive regulation of nucleic acid-templated transcription)	NA	K22528	NA
0	ENSDARG00000030440	rsrp1	4.27696	3.41463	0.324856	2.49011e-34	6.90059e-30	arginine/serine-rich protein 1 [Source:ZFIN;Acc:ZDB-GENE-060616-210]	NA	NA	NA	NA
0	ENSDARG00000041394	dnajb1b	2.45304	2.03695	0.268162	3.00047e-34	8.31489e-30	DnaJ heat shock protein family (Hsp40) member B1b [Source:ZFIN;Acc:ZDB-GENE-030131-5455]	GO:0000122(negative regulation of transcription by RNA polymerase II);GO:0002088(lens development in camera-type eye);GO:0005575(cellular_component);GO:0005829(cytosol);GO:0006457(protein folding);GO:0051082(unfolded protein binding);GO:0051085(chaperone cofactor-dependent protein refolding);GO:0051087(chaperone binding)	04141(Protein processing in endoplasmic reticulum)	K09507	NA
0	ENSDARG00000077473	mych	5.37034	4.41164	0.283696	3.1564e-34	8.74701e-30	myelocytomatosis oncogene homolog [Source:ZFIN;Acc:ZDB-GENE-030219-51]	GO:0003677(DNA binding);GO:0003700(DNA-binding transcription factor activity);GO:0005634(nucleus);GO:0006355(regulation of transcription, DNA-templated);GO:0014032(neural crest cell development);GO:0046983(protein dimerization activity)	NA	NA	NA
0	ENSDARG00000042322	si:dkey-177p2.6	1.7859	1.36175	0.391192	8.73251e-34	2.41995e-29	si:dkey-177p2.6 [Source:ZFIN;Acc:ZDB-GENE-030131-5926]	GO:0003674(molecular_function);GO:0005575(cellular_component);GO:0008150(biological_process)	NA	NA	NA
0	ENSDARG00000088428	si:ch211-189a15.5	1.21028	0.954474	0.342559	5.85631e-33	1.6229e-28	si:ch211-189a15.5 [Source:ZFIN;Acc:ZDB-GENE-141215-48]	NA	04217(Necroptosis)	K17595	NA
0	ENSDARG00000000767	spi1b	4.92526	4.09221	0.267319	1.55422e-32	4.30705e-28	Spi-1 proto-oncogene b [Source:ZFIN;Acc:ZDB-GENE-980526-164]	GO:0000981(DNA-binding transcription factor activity, RNA polymerase II-specific);GO:0003677(DNA binding);GO:0003700(DNA-binding transcription factor activity);GO:0005515(protein binding);GO:0005634(nucleus);GO:0006355(regulation of transcription, DNA-templated);GO:0006357(regulation of transcription by RNA polymerase II);GO:0010628(positive regulation of gene expression);GO:0030099(myeloid cell …	NA	K09438	NA
0	ENSDARG00000094210	fthl31	1.10552	0.897505	0.300728	3.3945e-32	9.40683e-28	ferritin, heavy polypeptide-like 31 [Source:ZFIN;Acc:ZDB-GENE-050522-428]	GO:0005623(cell);GO:0006826(iron ion transport);GO:0006879(cellular iron ion homeostasis);GO:0008199(ferric iron binding);GO:0046872(metal ion binding)	NA	NA	NA
0	ENSDARG00000043531	jun	11.271	8.09569	0.477395	1.48237e-31	4.10795e-27	Jun proto-oncogene, AP-1 transcription factor subunit [Source:ZFIN;Acc:ZDB-GENE-030131-7859]	GO:0000122(negative regulation of transcription by RNA polymerase II);GO:0000790(nuclear chromatin);GO:0000978(RNA polymerase II proximal promoter sequence-specific DNA binding);GO:0000981(DNA-binding transcription factor activity, RNA polymerase II-specific);GO:0003677(DNA binding);GO:0003700(DNA-binding transcription factor activity);GO:0003713(transcription coactivator activity);GO:0005654(nuc…	04010(MAPK signaling pathway);04012(ErbB signaling pathway);04137(Mitophagy - animal);04210(Apoptosis);04310(Wnt signaling pathway);04510(Focal adhesion);04530(Tight junction);04620(Toll-like receptor signaling pathway);04621(NOD-like receptor signaling pathway);04625(C-type lectin receptor signaling pathway);04912(GnRH signaling pathway);04933(AGE-RAGE signaling pathway in diabetic complications…	K04448	NA
0	ENSDARG00000061736	ank3a	1.21939	0.955754	0.35145	1.72537e-31	4.78134e-27	ankyrin 3a [Source:ZFIN;Acc:ZDB-GENE-060621-1]	GO:0005515(protein binding);GO:0007165(signal transduction)	NA	K10380	NA
0	ENSDARG00000037895	ramp2	0.983827	0.821013	0.260999	2.07552e-31	5.75168e-27	receptor (G protein-coupled) activity modifying protein 2 [Source:ZFIN;Acc:ZDB-GENE-080204-79]	GO:0001525(angiogenesis);GO:0006816(calcium ion transport);GO:0006886(intracellular protein transport);GO:0007186(G protein-coupled receptor signaling pathway);GO:0008277(regulation of G protein-coupled receptor signaling pathway);GO:0008565(protein transporter activity);GO:0009986(cell surface);GO:0015026(coreceptor activity);GO:0015031(protein transport);GO:0016020(membrane);GO:0016021(integral…	04270(Vascular smooth muscle contraction)	K08448	NA
0	ENSDARG00000024940	rnf144b	1.14556	0.952269	0.266611	3.35956e-31	9.31002e-27	ring finger protein 144B [Source:ZFIN;Acc:ZDB-GENE-040426-1292]	GO:0000151(ubiquitin ligase complex);GO:0000209(protein polyubiquitination);GO:0004842(ubiquitin-protein transferase activity);GO:0005737(cytoplasm);GO:0006511(ubiquitin-dependent protein catabolic process);GO:0016020(membrane);GO:0016021(integral component of membrane);GO:0016567(protein ubiquitination);GO:0016740(transferase activity);GO:0031624(ubiquitin conjugating enzyme binding);GO:0032436(…	NA	K11975	EC:2.3.2.31
0	ENSDARG00000004060	bhlhe40	25.2755	19.5901	0.367615	9.08428e-31	2.51743e-26	basic helix-loop-helix family, member e40 [Source:ZFIN;Acc:ZDB-GENE-030131-3133]	GO:0000977(RNA polymerase II regulatory region sequence-specific DNA binding);GO:0001756(somitogenesis);GO:0003677(DNA binding);GO:0003714(transcription corepressor activity);GO:0005634(nucleus);GO:0006355(regulation of transcription, DNA-templated);GO:0007219(Notch signaling pathway);GO:0008134(transcription factor binding);GO:0030154(cell differentiation);GO:0032922(circadian regulation of gene…	NA	K03729	NA
0	ENSDARG00000031745	si:busm1-266f07.2	14.7444	12.224	0.270455	4.76116e-30	1.31941e-25	si:busm1-266f07.2 [Source:ZFIN;Acc:ZDB-GENE-030616-436]	GO:0006955(immune response);GO:0016020(membrane);GO:0016021(integral component of membrane);GO:0019882(antigen processing and presentation);GO:0042613(MHC class II protein complex)	04145(Phagosome);04514(Cell adhesion molecules (CAMs));04672(Intestinal immune network for IgA production);05168(Herpes simplex virus 1 infection)	K06752	NA
0	ENSDARG00000015922	stk17al	1.20306	0.925834	0.377879	7.15092e-30	1.98166e-25	serine/threonine kinase 17a like [Source:ZFIN;Acc:ZDB-GENE-061103-427]	GO:0004672(protein kinase activity);GO:0004674(protein serine/threonine kinase activity);GO:0005524(ATP binding);GO:0005634(nucleus);GO:0006468(protein phosphorylation)	NA	K08804	EC:2.7.11.1
0	ENSDARG00000074378	junba	5.74332	4.643	0.306826	4.2266e-29	1.17127e-24	JunB proto-oncogene, AP-1 transcription factor subunit a [Source:ZFIN;Acc:ZDB-GENE-040426-2172]	GO:0000122(negative regulation of transcription by RNA polymerase II);GO:0000790(nuclear chromatin);GO:0000978(RNA polymerase II proximal promoter sequence-specific DNA binding);GO:0000981(DNA-binding transcription factor activity, RNA polymerase II-specific);GO:0001945(lymph vessel development);GO:0003677(DNA binding);GO:0003700(DNA-binding transcription factor activity);GO:0003713(transcription…	NA	K09028	NA
0	ENSDARG00000089858	cobll1a	1.84367	1.44566	0.350857	7.51071e-29	2.08137e-24	cordon-bleu WH2 repeat protein-like 1a [Source:ZFIN;Acc:ZDB-GENE-120215-171]	GO:0003785(actin monomer binding);GO:0007165(signal transduction)	NA	NA	NA
0	ENSDARG00000032619	tob1a	2.41332	1.9543	0.304365	8.85766e-29	2.45463e-24	transducer of ERBB2, 1a [Source:ZFIN;Acc:ZDB-GENE-031030-4]	GO:0003714(transcription corepressor activity);GO:0005515(protein binding);GO:0005634(nucleus);GO:0005737(cytoplasm);GO:0008285(negative regulation of cell population proliferation);GO:0009953(dorsal/ventral pattern formation);GO:0010468(regulation of gene expression);GO:0030509(BMP signaling pathway);GO:1903507(negative regulation of nucleic acid-templated transcription)	03018(RNA degradation)	K14443	NA
0	ENSDARG00000036161	hnrnpa0l.1	21.556	17.9644	0.262946	9.26616e-29	2.56784e-24	heterogeneous nuclear ribonucleoprotein A0, like [Source:ZFIN;Acc:ZDB-GENE-030131-618]	GO:0003676(nucleic acid binding);GO:0003723(RNA binding)	NA	NA	NA
0	ENSDARG00000045695	myca	1.31944	1.08517	0.28201	1.42499e-28	3.94893e-24	MYC proto-oncogene, bHLH transcription factor a [Source:ZFIN;Acc:ZDB-GENE-990415-162]	GO:0003677(DNA binding);GO:0003700(DNA-binding transcription factor activity);GO:0005634(nucleus);GO:0006355(regulation of transcription, DNA-templated);GO:0046983(protein dimerization activity)	NA	NA	NA
0	ENSDARG00000058100	b3gnt3.4	1.52278	1.25964	0.273696	1.03939e-27	2.88036e-23	UDP-GlcNAc:betaGal beta-1,3-N-acetylglucosaminyltransferase 3, tandem duplicate 4 [Source:ZFIN;Acc:ZDB-GENE-030131-8875]	GO:0000139(Golgi membrane);GO:0005783(endoplasmic reticulum);GO:0005794(Golgi apparatus);GO:0006486(protein glycosylation);GO:0008376(acetylgalactosaminyltransferase activity);GO:0008378(galactosyltransferase activity);GO:0008532(N-acetyllactosaminide beta-1,3-N-acetylglucosaminyltransferase activity);GO:0016020(membrane);GO:0016021(integral component of membrane);GO:0016740(transferase activity)…	00601(Glycosphingolipid biosynthesis - lacto and neolacto series)	K07970	2.4.1.149;EC:2.4.1.146
0	ENSDARG00000037091	asah1a	0.943786	0.781622	0.271989	3.18216e-27	8.81839e-23	N-acylsphingosine amidohydrolase (acid ceramidase) 1a [Source:ZFIN;Acc:ZDB-GENE-041010-191]	GO:0005764(lysosome);GO:0006629(lipid metabolic process);GO:0016810(hydrolase activity, acting on carbon-nitrogen (but not peptide) bonds);GO:0017040(N-acylsphingosine amidohydrolase activity)	00600(Sphingolipid metabolism);04142(Lysosome)	K12348	EC:3.5.1.23
0	ENSDARG00000026762	fam126a	0.856285	0.701694	0.287248	2.69641e-26	7.47228e-22	family with sequence similarity 126 member A [Source:ZFIN;Acc:ZDB-GENE-040426-1806]	GO:0003674(molecular_function);GO:0005737(cytoplasm);GO:0005829(cytosol);GO:0005886(plasma membrane);GO:0016020(membrane);GO:0042552(myelination);GO:0046854(phosphatidylinositol phosphorylation);GO:0072659(protein localization to plasma membrane)	NA	K21844	NA
0	ENSDARG00000032868	pde4ba	7.57442	6.26239	0.274422	4.30814e-26	1.19387e-21	phosphodiesterase 4B, cAMP-specific a [Source:ZFIN;Acc:ZDB-GENE-030131-9570]	GO:0004114(3',5'-cyclic-nucleotide phosphodiesterase activity);GO:0004115(3',5'-cyclic-AMP phosphodiesterase activity);GO:0005515(protein binding);GO:0005829(cytosol);GO:0007165(signal transduction);GO:0008081(phosphoric diester hydrolase activity);GO:0016787(hydrolase activity);GO:0030552(cAMP binding);GO:0044325(ion channel binding);GO:0046872(metal ion binding)	00230(Purine metabolism)	K13293	EC:3.1.4.53
0	ENSDARG00000002353	tagapa	7.69362	5.92487	0.37688	6.61717e-26	1.83375e-21	T cell activation RhoGTPase activating protein a [Source:ZFIN;Acc:ZDB-GENE-040426-1877]	GO:0005096(GTPase activator activity);GO:0007165(signal transduction);GO:0043547(positive regulation of GTPase activity)	NA	NA	NA
0	ENSDARG00000025847	sox12	1.26831	1.00686	0.333049	1.2777e-25	3.54076e-21	SRY (sex determining region Y)-box 12 [Source:ZFIN;Acc:ZDB-GENE-040724-33]	GO:0000981(DNA-binding transcription factor activity, RNA polymerase II-specific);GO:0003677(DNA binding);GO:0003700(DNA-binding transcription factor activity);GO:0005634(nucleus);GO:0006355(regulation of transcription, DNA-templated);GO:0006357(regulation of transcription by RNA polymerase II);GO:0030154(cell differentiation);GO:0044798(nuclear transcription factor complex)	NA	K09268	NA
0	ENSDARG00000000796	nr4a1	10.8437	7.8176	0.472054	4.75467e-25	1.31762e-20	nuclear receptor subfamily 4, group A, member 1 [Source:ZFIN;Acc:ZDB-GENE-040704-11]	GO:0000977(RNA polymerase II regulatory region sequence-specific DNA binding);GO:0000978(RNA polymerase II proximal promoter sequence-specific DNA binding);GO:0003677(DNA binding);GO:0003700(DNA-binding transcription factor activity);GO:0003707(steroid hormone receptor activity);GO:0004879(nuclear receptor activity);GO:0005634(nucleus);GO:0005667(transcription factor complex);GO:0006355(regulatio…	04010(MAPK signaling pathway)	K04465	NA
0	ENSDARG00000055751	fosb	1.9414	1.28655	0.593591	5.37331e-25	1.48905e-20	FBJ murine osteosarcoma viral oncogene homolog B [Source:ZFIN;Acc:ZDB-GENE-041114-181]	GO:0000978(RNA polymerase II proximal promoter sequence-specific DNA binding);GO:0003677(DNA binding);GO:0003700(DNA-binding transcription factor activity);GO:0005634(nucleus);GO:0006355(regulation of transcription, DNA-templated);GO:0006357(regulation of transcription by RNA polymerase II)	NA	K09029	NA
0	ENSDARG00000096248	ighd	0.897265	0.742765	0.272629	5.75343e-24	1.59439e-19	immunoglobulin heavy constant delta [Source:ZFIN;Acc:ZDB-GENE-040513-9]	GO:0003823(antigen binding);GO:0006910(phagocytosis, recognition);GO:0006911(phagocytosis, engulfment);GO:0006958(complement activation, classical pathway);GO:0009897(external side of plasma membrane);GO:0016020(membrane);GO:0016021(integral component of membrane);GO:0032496(response to lipopolysaccharide);GO:0034987(immunoglobulin receptor binding);GO:0042571(immunoglobulin complex, circulating)…	NA	NA	NA
0	ENSDARG00000031426	csrnp1a	1.58479	1.32132	0.262305	5.71612e-23	1.58405e-18	cysteine-serine-rich nuclear protein 1a [Source:ZFIN;Acc:ZDB-GENE-070912-475]	GO:0060215(primitive hemopoiesis)	NA	K17494	NA
0	ENSDARG00000035719	arl5c	7.09242	5.87866	0.270792	3.28899e-22	9.11445e-18	ADP-ribosylation factor-like 5C [Source:ZFIN;Acc:ZDB-GENE-040426-1866]	GO:0000166(nucleotide binding);GO:0005525(GTP binding);GO:0005737(cytoplasm);GO:0005802(trans-Golgi network);GO:0006886(intracellular protein transport);GO:0016192(vesicle-mediated transport);GO:1903292(protein localization to Golgi membrane)	NA	NA	NA
0	ENSDARG00000054823	id3	3.70661	3.01392	0.298461	5.85514e-22	1.62258e-17	inhibitor of DNA binding 3 [Source:ZFIN;Acc:ZDB-GENE-020515-1]	GO:0001085(RNA polymerase II transcription factor binding);GO:0003700(DNA-binding transcription factor activity);GO:0005634(nucleus);GO:0005737(cytoplasm);GO:0007623(circadian rhythm);GO:0008134(transcription factor binding);GO:0030182(neuron differentiation);GO:0043392(negative regulation of DNA binding);GO:0045665(negative regulation of neuron differentiation);GO:0045892(negative regulation of …	04350(TGF-beta signaling pathway)	K17694	NA
0	ENSDARG00000015355	fosl1a	0.952968	0.765566	0.315902	1.30924e-19	3.62817e-15	FOS-like antigen 1a [Source:ZFIN;Acc:ZDB-GENE-061207-7]	GO:0000978(RNA polymerase II proximal promoter sequence-specific DNA binding);GO:0003677(DNA binding);GO:0003700(DNA-binding transcription factor activity);GO:0005634(nucleus);GO:0006355(regulation of transcription, DNA-templated);GO:0006357(regulation of transcription by RNA polymerase II)	04310(Wnt signaling pathway)	K04502	NA
0	ENSDARG00000089087	hbba1.1	1.47075	1.1348	0.374113	6.55967e-19	1.81782e-14	hemoglobin, beta adult 1 [Source:ZFIN;Acc:ZDB-GENE-990415-18]	GO:0001666(response to hypoxia);GO:0004601(peroxidase activity);GO:0005344(oxygen carrier activity);GO:0005515(protein binding);GO:0005833(hemoglobin complex);GO:0015671(oxygen transport);GO:0019825(oxygen binding);GO:0020037(heme binding);GO:0030097(hemopoiesis);GO:0031720(haptoglobin binding);GO:0031838(haptoglobin-hemoglobin complex);GO:0042744(hydrogen peroxide catabolic process);GO:0043177(o…	NA	K13825	NA
0	ENSDARG00000100947	mafk	0.791136	0.658072	0.26568	1.24034e-18	3.43724e-14	v-maf avian musculoaponeurotic fibrosarcoma oncogene homolog K [Source:ZFIN;Acc:ZDB-GENE-040624-9]	GO:0000976(transcription regulatory region sequence-specific DNA binding);GO:0000978(RNA polymerase II proximal promoter sequence-specific DNA binding);GO:0003677(DNA binding);GO:0003700(DNA-binding transcription factor activity);GO:0005634(nucleus);GO:0005667(transcription factor complex);GO:0006351(transcription, DNA-templated);GO:0006355(regulation of transcription, DNA-templated);GO:0043565(s…	NA	K09037	NA
0	ENSDARG00000039150	lgmn	1.99328	1.61629	0.302462	3.08351e-18	8.54502e-14	legumain [Source:ZFIN;Acc:ZDB-GENE-021030-1]	GO:0004197(cysteine-type endopeptidase activity);GO:0005773(vacuole);GO:0006508(proteolysis);GO:0006624(vacuolar protein processing);GO:0008233(peptidase activity);GO:0031103(axon regeneration);GO:0042246(tissue regeneration);GO:0051603(proteolysis involved in cellular protein catabolic process)	04142(Lysosome)	K01369	EC:3.4.22.34
0	ENSDARG00000059254	illr1	1.0932	0.880336	0.312434	1.54502e-16	4.28157e-12	immune-related, lectin-like receptor 1 [Source:ZFIN;Acc:ZDB-GENE-050311-2]	GO:0016020(membrane);GO:0016021(integral component of membrane);GO:0030246(carbohydrate binding)	NA	NA	NA
0		NC-002333.4	261.242	207.278	0.333819	1.20043e-13	3.32662e-09	NA	NA	NA	NA	NA
0	ENSDARG00000037421	egr1	2.04581	1.5572	0.393717	8.7653e-12	2.42904e-07	early growth response 1 [Source:ZFIN;Acc:ZDB-GENE-980526-320]	GO:0000981(DNA-binding transcription factor activity, RNA polymerase II-specific);GO:0003676(nucleic acid binding);GO:0003677(DNA binding);GO:0005634(nucleus);GO:0005737(cytoplasm);GO:0006357(regulation of transcription by RNA polymerase II);GO:0008270(zinc ion binding);GO:0010385(double-stranded methylated DNA binding);GO:0032922(circadian regulation of gene expression);GO:0043010(camera-type ey…	04371(Apelin signaling pathway);04912(GnRH signaling pathway);04933(AGE-RAGE signaling pathway in diabetic complications)	K09203	NA
1	ENSDARG00000026766	bcl2l10	35.6021	22.4544	0.664963	4.64537e-63	1.28732e-58	BCL2 like 10 [Source:ZFIN;Acc:ZDB-GENE-030825-2]	GO:0001756(somitogenesis);GO:0005515(protein binding);GO:0005739(mitochondrion);GO:0005741(mitochondrial outer membrane);GO:0007369(gastrulation);GO:0008630(intrinsic apoptotic signaling pathway in response to DNA damage);GO:0016020(membrane);GO:0016021(integral component of membrane);GO:0019722(calcium-mediated signaling);GO:0042803(protein homodimerization activity);GO:0042981(regulation of apo…	NA	K18451	NA
1	ENSDARG00000103466	ccl35.1	171.129	101.951	0.747204	4.15359e-59	1.15104e-54	chemokine (C-C motif) ligand 35, duplicate 1 [Source:ZFIN;Acc:ZDB-GENE-081022-33]	GO:0002548(monocyte chemotaxis);GO:0005576(extracellular region);GO:0005615(extracellular space);GO:0006954(inflammatory response);GO:0006955(immune response);GO:0007186(G protein-coupled receptor signaling pathway);GO:0008009(chemokine activity);GO:0030593(neutrophil chemotaxis);GO:0043547(positive regulation of GTPase activity);GO:0048020(CCR chemokine receptor binding);GO:0048247(lymphocyte ch…	NA	NA	NA
1	ENSDARG00000086963	BX649442.1	3.6723	2.17938	0.752763	1.48202e-40	4.10698e-36	NA	NA	NA	NA	NA
1	ENSDARG00000014329	npm1a	6.88577	4.83481	0.510158	4.30315e-38	1.19249e-33	nucleophosmin 1a [Source:ZFIN;Acc:ZDB-GENE-021028-1]	GO:0003676(nucleic acid binding);GO:0003682(chromatin binding);GO:0005654(nucleoplasm);GO:0005730(nucleolus);GO:0005737(cytoplasm);GO:0006338(chromatin remodeling);GO:0030097(hemopoiesis);GO:0042393(histone binding);GO:0042981(regulation of apoptotic process)	NA	K11276	NA
1	ENSDARG00000104353	nop58	4.17751	2.93214	0.510688	4.98443e-35	1.38128e-30	NOP58 ribonucleoprotein homolog (yeast) [Source:ZFIN;Acc:ZDB-GENE-040426-2140]	GO:0030515(snoRNA binding);GO:0031428(box C/D snoRNP complex);GO:0032040(small-subunit processome)	03008(Ribosome biogenesis in eukaryotes)	K14565	NA
1	ENSDARG00000095693	CT573231.1	6.9456	5.04419	0.461475	2.1702e-33	6.01407e-29	NA	NA	NA	NA	NA
1	ENSDARG00000100383	il10ra	2.70002	1.80165	0.583653	5.1103e-32	1.41617e-27	interleukin 10 receptor, alpha [Source:ZFIN;Acc:ZDB-GENE-070905-4]	GO:0004896(cytokine receptor activity);GO:0005515(protein binding);GO:0005886(plasma membrane);GO:0016020(membrane);GO:0016021(integral component of membrane);GO:0019221(cytokine-mediated signaling pathway)	NA	NA	NA
1	ENSDARG00000045190	ch25h	4.27257	2.59496	0.719389	1.77619e-31	4.92219e-27	cholesterol 25-hydroxylase [Source:ZFIN;Acc:ZDB-GENE-041212-81]	GO:0000254(C-4 methylsterol oxidase activity);GO:0001567(cholesterol 25-hydroxylase activity);GO:0004497(monooxygenase activity);GO:0005506(iron ion binding);GO:0005783(endoplasmic reticulum);GO:0005789(endoplasmic reticulum membrane);GO:0006629(lipid metabolic process);GO:0006694(steroid biosynthetic process);GO:0008202(steroid metabolic process);GO:0008203(cholesterol metabolic process);GO:0008…	00120(Primary bile acid biosynthesis)	K10223	EC:1.14.99.38
1	ENSDARG00000070378	ccl35.2	7.22276	4.60526	0.649267	2.86723e-31	7.94567e-27	chemokine (C-C motif) ligand 35, duplicate 2 [Source:ZFIN;Acc:ZDB-GENE-140718-1]	GO:0002548(monocyte chemotaxis);GO:0005576(extracellular region);GO:0005615(extracellular space);GO:0006954(inflammatory response);GO:0006955(immune response);GO:0007186(G protein-coupled receptor signaling pathway);GO:0008009(chemokine activity);GO:0030593(neutrophil chemotaxis);GO:0043547(positive regulation of GTPase activity);GO:0048020(CCR chemokine receptor binding);GO:0048247(lymphocyte ch…	NA	NA	NA
1	ENSDARG00000016484	dkc1	2.22018	1.56861	0.501187	1.87311e-29	5.19078e-25	dyskeratosis congenita 1, dyskerin [Source:ZFIN;Acc:ZDB-GENE-031118-120]	GO:0000495(box H/ACA snoRNA 3'-end processing);GO:0001522(pseudouridine synthesis);GO:0003723(RNA binding);GO:0006364(rRNA processing);GO:0006396(RNA processing);GO:0009451(RNA modification);GO:0009982(pseudouridine synthase activity);GO:0031118(rRNA pseudouridine synthesis);GO:0031120(snRNA pseudouridine synthesis);GO:0031429(box H/ACA snoRNP complex);GO:0060216(definitive hemopoiesis);GO:199048…	03008(Ribosome biogenesis in eukaryotes)	K11131	EC:5.4.99.-
1	ENSDARG00000090337	pprc1	2.46535	1.76112	0.485305	2.00711e-29	5.56209e-25	peroxisome proliferator-activated receptor gamma, coactivator-related 1 [Source:ZFIN;Acc:ZDB-GENE-030131-9858]	GO:0003676(nucleic acid binding);GO:0003712(transcription coregulator activity);GO:0003723(RNA binding);GO:0005634(nucleus);GO:0008134(transcription factor binding);GO:0030374(nuclear receptor transcription coactivator activity);GO:0045944(positive regulation of transcription by RNA polymerase II);GO:0051091(positive regulation of DNA-binding transcription factor activity)	NA	K17963	NA
1	ENSDARG00000074902	nol4la	1.57065	1.1581	0.439595	1.0024e-27	2.77785e-23	nucleolar protein 4-like a [Source:ZFIN;Acc:ZDB-GENE-081105-118]	NA	NA	NA	NA
1	ENSDARG00000090396	si:cabz01074946.1	5.67463	3.87649	0.549774	9.36201e-27	2.5944e-22	si:cabz01074946.1 [Source:ZFIN;Acc:ZDB-GENE-160113-134]	GO:0016020(membrane);GO:0016021(integral component of membrane)	NA	K06511	NA
1	ENSDARG00000059075	nip7	0.866014	0.666442	0.377912	1.69012e-26	4.68367e-22	NIP7, nucleolar pre-rRNA processing protein [Source:ZFIN;Acc:ZDB-GENE-050522-256]	GO:0003723(RNA binding);GO:0005634(nucleus);GO:0005730(nucleolus);GO:0030687(preribosome, large subunit precursor);GO:0042254(ribosome biogenesis);GO:0042255(ribosome assembly);GO:0042273(ribosomal large subunit biogenesis)	NA	K07565	NA
1	ENSDARG00000056407	irf8	9.55913	7.05929	0.437355	1.8188e-26	5.04025e-22	interferon regulatory factor 8 [Source:ZFIN;Acc:ZDB-GENE-040718-367]	GO:0000981(DNA-binding transcription factor activity, RNA polymerase II-specific);GO:0002376(immune system process);GO:0002573(myeloid leukocyte differentiation);GO:0003700(DNA-binding transcription factor activity);GO:0005515(protein binding);GO:0005634(nucleus);GO:0006355(regulation of transcription, DNA-templated);GO:0006357(regulation of transcription by RNA polymerase II);GO:0014005(microgli…	NA	K10155	NA
1	ENSDARG00000060498	tnfrsf9a	4.60826	2.78349	0.727328	2.23541e-26	6.19476e-22	tumor necrosis factor receptor superfamily, member 9a [Source:ZFIN;Acc:ZDB-GENE-060421-8213]	GO:0005515(protein binding);GO:0016020(membrane);GO:0016021(integral component of membrane)	04060(Cytokine-cytokine receptor interaction)	K05146	NA
1	ENSDARG00000043304	nop2	1.75456	1.30836	0.423344	7.87899e-26	2.18343e-21	NOP2 nucleolar protein homolog (yeast) [Source:ZFIN;Acc:ZDB-GENE-050309-7]	GO:0003723(RNA binding);GO:0005730(nucleolus);GO:0006364(rRNA processing);GO:0008168(methyltransferase activity);GO:0008757(S-adenosylmethionine-dependent methyltransferase activity);GO:0009383(rRNA (cytosine-C5-)-methyltransferase activity);GO:0016740(transferase activity);GO:0032259(methylation);GO:0070475(rRNA base methylation)	NA	K14835	EC:2.1.1.310
1	ENSDARG00000012820	nop56	5.33277	4.08378	0.384977	1.23007e-25	3.40876e-21	NOP56 ribonucleoprotein homolog [Source:ZFIN;Acc:ZDB-GENE-040109-1]	GO:0007507(heart development);GO:0030515(snoRNA binding);GO:0031428(box C/D snoRNP complex);GO:0032040(small-subunit processome)	03008(Ribosome biogenesis in eukaryotes)	K14564	NA
1	ENSDARG00000010625	clic2	3.4217	2.37694	0.525607	1.18788e-24	3.29186e-20	chloride intracellular channel 2 [Source:ZFIN;Acc:ZDB-GENE-040718-299]	GO:0005244(voltage-gated ion channel activity);GO:0005254(chloride channel activity);GO:0005515(protein binding);GO:0005634(nucleus);GO:0005737(cytoplasm);GO:0006811(ion transport);GO:0006821(chloride transport);GO:0016020(membrane);GO:0034707(chloride channel complex);GO:0034765(regulation of ion transmembrane transport);GO:0060315(negative regulation of ryanodine-sensitive calcium-release chann…	NA	K05022	NA
1	ENSDARG00000055377	gnb5b	0.734655	0.542331	0.437894	2.1663e-24	6.00326e-20	guanine nucleotide binding protein (G protein), beta 5b [Source:ZFIN;Acc:ZDB-GENE-040426-1712]	GO:0005515(protein binding);GO:0007165(signal transduction);GO:0016020(membrane)	04371(Apelin signaling pathway)	K04539	NA
1	ENSDARG00000005481	nfkbiaa	26.3836	19.6692	0.423701	6.67972e-24	1.85109e-19	nuclear factor of kappa light polypeptide gene enhancer in B-cells inhibitor, alpha a [Source:ZFIN;Acc:ZDB-GENE-040426-2227]	GO:0005515(protein binding);GO:0009615(response to virus);GO:1901532(regulation of hematopoietic progenitor cell differentiation);GO:1901533(negative regulation of hematopoietic progenitor cell differentiation)	04210(Apoptosis);04620(Toll-like receptor signaling pathway);04621(NOD-like receptor signaling pathway);04622(RIG-I-like receptor signaling pathway);04623(Cytosolic DNA-sensing pathway);04625(C-type lectin receptor signaling pathway);04920(Adipocytokine signaling pathway);05168(Herpes simplex virus 1 infection)	K04734	NA
1	ENSDARG00000023299	snu13b	2.1794	1.6856	0.370663	1.10836e-22	3.07148e-18	SNU13 homolog, small nuclear ribonucleoprotein b (U4/U6.U5) [Source:ZFIN;Acc:ZDB-GENE-030131-9670]	GO:0000398(mRNA splicing, via spliceosome);GO:0000470(maturation of LSU-rRNA);GO:0003723(RNA binding);GO:0005730(nucleolus);GO:0031428(box C/D snoRNP complex);GO:0032040(small-subunit processome);GO:0042254(ribosome biogenesis);GO:0046540(U4/U6 x U5 tri-snRNP complex);GO:0061053(somite development);GO:1990904(ribonucleoprotein complex)	03008(Ribosome biogenesis in eukaryotes);03040(Spliceosome)	K12845	NA
1	ENSDARG00000057853	atp6v0ca	6.47799	5.05336	0.358305	2.1532e-22	5.96696e-18	ATPase H+ transporting V0 subunit ca [Source:ZFIN;Acc:ZDB-GENE-020419-23]	GO:0001878(response to yeast);GO:0005773(vacuole);GO:0005774(vacuolar membrane);GO:0006811(ion transport);GO:0015078(proton transmembrane transporter activity);GO:0015991(ATP hydrolysis coupled proton transport);GO:0016020(membrane);GO:0016021(integral component of membrane);GO:0033177(proton-transporting two-sector ATPase complex, proton-transporting domain);GO:0033179(proton-transporting V-type…	00190(Oxidative phosphorylation);04142(Lysosome);04145(Phagosome)	K02155	NA
1	ENSDARG00000024416	twistnb	1.72976	1.29228	0.420654	2.33099e-21	6.45964e-17	TWIST neighbor [Source:ZFIN;Acc:ZDB-GENE-041007-3]	GO:0003899(DNA-directed 5'-3' RNA polymerase activity);GO:0006351(transcription, DNA-templated)	03020(RNA polymerase)	K03004	NA
1	ENSDARG00000022232	ppan	1.07465	0.816475	0.396385	5.79892e-21	1.607e-16	peter pan homolog [Source:ZFIN;Acc:ZDB-GENE-030114-4]	GO:0000027(ribosomal large subunit assembly);GO:0030687(preribosome, large subunit precursor)	NA	K14859	NA
1	ENSDARG00000088087	kdm6ba	15.652	12.3079	0.346761	6.45112e-21	1.78773e-16	lysine (K)-specific demethylase 6B, a [Source:ZFIN;Acc:ZDB-GENE-091005-1]	GO:0000978(RNA polymerase II proximal promoter sequence-specific DNA binding);GO:0003682(chromatin binding);GO:0005634(nucleus);GO:0007507(heart development);GO:0031490(chromatin DNA binding);GO:0043565(sequence-specific DNA binding);GO:0044666(MLL3/4 complex);GO:0046872(metal ion binding);GO:0061384(heart trabecula morphogenesis);GO:0071557(histone H3-K27 demethylation);GO:0071558(histone demeth…	NA	K11448	EC:1.14.11.-
1	ENSDARG00000092191	CR318588.1	477.858	383.61	0.316942	8.32579e-21	2.30724e-16	uncharacterized LOC100535167 [Source:NCBI gene;Acc:100535167]	NA	NA	NA	NA
1	ENSDARG00000003941	rrs1	1.53237	1.21121	0.339313	1.80347e-20	4.99777e-16	RRS1 ribosome biogenesis regulator homolog (S. cerevisiae) [Source:ZFIN;Acc:ZDB-GENE-030131-9345]	GO:0000055(ribosomal large subunit export from nucleus);GO:0000447(endonucleolytic cleavage in ITS1 to separate SSU-rRNA from 5.8S rRNA and LSU-rRNA from tricistronic rRNA transcript (SSU-rRNA, 5.8S rRNA, LSU-rRNA));GO:0003674(molecular_function);GO:0005634(nucleus);GO:0005730(nucleolus);GO:0030687(preribosome, large subunit precursor);GO:0042254(ribosome biogenesis);GO:0042273(ribosomal large su…	NA	K14852	NA
1	ENSDARG00000076532	si:ch211-222l21.1	16.467	13.1371	0.325934	1.2365e-19	3.4266e-15	si:ch211-222l21.1 [Source:ZFIN;Acc:ZDB-GENE-030131-247]	NA	NA	NA	NA
1	ENSDARG00000056281	cyb561a3a	1.47975	1.14002	0.376295	1.80466e-19	5.00109e-15	cytochrome b561 family, member A3a [Source:ZFIN;Acc:ZDB-GENE-060526-374]	GO:0005764(lysosome);GO:0005765(lysosomal membrane);GO:0005768(endosome);GO:0016020(membrane);GO:0016021(integral component of membrane);GO:0016491(oxidoreductase activity);GO:0031902(late endosome membrane);GO:0046872(metal ion binding);GO:0055114(oxidation-reduction process)	NA	K16295	NA
1	ENSDARG00000056160	hspd1	2.05629	1.61389	0.349506	9.96615e-19	2.76182e-14	heat shock 60 protein 1 [Source:ZFIN;Acc:ZDB-GENE-021206-1]	GO:0005524(ATP binding);GO:0005737(cytoplasm);GO:0005739(mitochondrion);GO:0005759(mitochondrial matrix);GO:0005829(cytosol);GO:0006457(protein folding);GO:0006458('de novo' protein folding);GO:0007005(mitochondrion organization);GO:0008637(apoptotic mitochondrial changes);GO:0031101(fin regeneration);GO:0042026(protein refolding);GO:0042246(tissue regeneration);GO:0045041(protein import into mit…	03018(RNA degradation)	K04077	NA
1	ENSDARG00000089307	pmaip1	6.58058	4.52015	0.541843	4.72914e-18	1.31054e-13	phorbol-12-myristate-13-acetate-induced protein 1 [Source:ZFIN;Acc:ZDB-GENE-070119-3]	GO:0001836(release of cytochrome c from mitochondria);GO:0005575(cellular_component);GO:0006915(apoptotic process);GO:0006919(activation of cysteine-type endopeptidase activity involved in apoptotic process);GO:0006974(cellular response to DNA damage stimulus);GO:0007088(regulation of mitotic nuclear division);GO:0042981(regulation of apoptotic process);GO:0043065(positive regulation of apoptotic…	04115(p53 signaling pathway);04210(Apoptosis)	K10131	NA
1	ENSDARG00000088612	si:ch211-153b23.7	3.73318	2.83536	0.396871	1.55972e-17	4.3223e-13	si:ch211-153b23.7 [Source:ZFIN;Acc:ZDB-GENE-141216-14]	GO:0002755(MyD88-dependent toll-like receptor signaling pathway);GO:0043124(negative regulation of I-kappaB kinase/NF-kappaB signaling);GO:0050727(regulation of inflammatory response);GO:0070373(negative regulation of ERK1 and ERK2 cascade)	NA	NA	NA
1	ENSDARG00000068367	nfkbie	3.37804	2.73062	0.306955	2.26862e-17	6.2868e-13	nuclear factor of kappa light polypeptide gene enhancer in B-cells inhibitor, epsilon [Source:ZFIN;Acc:ZDB-GENE-061215-132]	GO:0003674(molecular_function);GO:0005515(protein binding);GO:0005575(cellular_component);GO:0008150(biological_process)	04920(Adipocytokine signaling pathway)	K05872	NA
1	ENSDARG00000069482	traf1	2.34417	1.78154	0.395953	2.67719e-17	7.41904e-13	TNF receptor-associated factor 1 [Source:ZFIN;Acc:ZDB-GENE-071120-4]	GO:0005164(tumor necrosis factor receptor binding);GO:0005515(protein binding);GO:0007165(signal transduction);GO:0008270(zinc ion binding);GO:0031625(ubiquitin protein ligase binding);GO:0031996(thioesterase binding);GO:0032991(protein-containing complex);GO:0042981(regulation of apoptotic process);GO:0046872(metal ion binding)	04210(Apoptosis)	K03172	NA
1	ENSDARG00000043475	TAGAP	3.32151	2.64999	0.325852	2.70373e-17	7.49258e-13	si:ch211-122h15.4 [Source:ZFIN;Acc:ZDB-GENE-121214-340]	GO:0005096(GTPase activator activity);GO:0007165(signal transduction);GO:0043547(positive regulation of GTPase activity)	NA	K20654	NA
1	ENSDARG00000104227	nop10	1.72819	1.35373	0.352316	3.09817e-17	8.58564e-13	NOP10 ribonucleoprotein homolog (yeast) [Source:ZFIN;Acc:ZDB-GENE-041007-4]	GO:0001522(pseudouridine synthesis);GO:0005634(nucleus);GO:0005697(telomerase holoenzyme complex);GO:0005730(nucleolus);GO:0006364(rRNA processing);GO:0007004(telomere maintenance via telomerase);GO:0030515(snoRNA binding);GO:0031118(rRNA pseudouridine synthesis);GO:0031120(snRNA pseudouridine synthesis);GO:0031429(box H/ACA snoRNP complex);GO:0034513(box H/ACA snoRNA binding);GO:0042254(ribosome…	03008(Ribosome biogenesis in eukaryotes)	K11130	NA
1	ENSDARG00000008434	bcl2l1	0.866086	0.698686	0.309867	1.19554e-16	3.31309e-12	BCL2 like 1 [Source:ZFIN;Acc:ZDB-GENE-010730-1]	GO:0001894(tissue homeostasis);GO:0005741(mitochondrial outer membrane);GO:0006915(apoptotic process);GO:0008630(intrinsic apoptotic signaling pathway in response to DNA damage);GO:0016020(membrane);GO:0016021(integral component of membrane);GO:0030878(thyroid gland development);GO:0042803(protein homodimerization activity);GO:0042981(regulation of apoptotic process);GO:0043027(cysteine-type endo…	04115(p53 signaling pathway);04137(Mitophagy - animal);04140(Autophagy - animal);04210(Apoptosis);04621(NOD-like receptor signaling pathway);05168(Herpes simplex virus 1 infection)	K04570	NA
1	ENSDARG00000061223	ogfrl1	1.41524	1.11905	0.338774	1.21669e-16	3.37168e-12	opioid growth factor receptor-like 1 [Source:ZFIN;Acc:ZDB-GENE-061207-32]	GO:0004985(opioid receptor activity);GO:0016020(membrane);GO:0038003(opioid receptor signaling pathway);GO:0038023(signaling receptor activity)	NA	NA	NA
1	ENSDARG00000059906	sdc4	5.14671	3.58198	0.522894	1.34239e-16	3.72003e-12	syndecan 4 [Source:ZFIN;Acc:ZDB-GENE-061111-1]	GO:0005546(phosphatidylinositol-4,5-bisphosphate binding);GO:0005925(focal adhesion);GO:0007155(cell adhesion);GO:0009986(cell surface);GO:0016020(membrane);GO:0016021(integral component of membrane);GO:0016477(cell migration);GO:0033627(cell adhesion mediated by integrin);GO:0036445(neuronal stem cell division);GO:0042060(wound healing);GO:0043149(stress fiber assembly);GO:0055113(epiboly involv…	04512(ECM-receptor interaction);04514(Cell adhesion molecules (CAMs))	K16338	NA
1	ENSDARG00000053912	fbl	1.79723	1.43863	0.321087	1.59841e-16	4.42952e-12	fibrillarin [Source:ZFIN;Acc:ZDB-GENE-040426-1936]	GO:0000494(box C/D snoRNA 3'-end processing);GO:0003723(RNA binding);GO:0005730(nucleolus);GO:0006364(rRNA processing);GO:0008168(methyltransferase activity);GO:0008649(rRNA methyltransferase activity);GO:0015030(Cajal body);GO:0031167(rRNA methylation);GO:0031428(box C/D snoRNP complex);GO:0032040(small-subunit processome);GO:1990258(histone glutamine methylation);GO:1990259(histone-glutamine me…	03008(Ribosome biogenesis in eukaryotes)	K14563	EC:2.1.1.-
1	ENSDARG00000094012	si:dkey-192g7.3	3.02432	2.2896	0.401516	2.03686e-16	5.64454e-12	si:dkey-192g7.3 [Source:ZFIN;Acc:ZDB-GENE-070912-411]	GO:0005102(signaling receptor binding);GO:0009897(external side of plasma membrane);GO:0016020(membrane);GO:0016021(integral component of membrane);GO:0050776(regulation of immune response);GO:0050852(T cell receptor signaling pathway)	NA	NA	NA
1	ENSDARG00000077264	wdr43	1.35483	1.07836	0.329279	2.24703e-16	6.22697e-12	WD repeat domain 43 [Source:ZFIN;Acc:ZDB-GENE-021231-3]	GO:0001525(angiogenesis);GO:0001570(vasculogenesis);GO:0005515(protein binding);GO:0042254(ribosome biogenesis);GO:0048703(embryonic viscerocranium morphogenesis);GO:0060218(hematopoietic stem cell differentiation)	03008(Ribosome biogenesis in eukaryotes)	K14546	NA
1	ENSDARG00000035133	pho	3.4183	2.54866	0.42354	2.4262e-16	6.72349e-12	phoenix [Source:ZFIN;Acc:ZDB-GENE-030131-5935]	GO:0070658(neuromast hair cell differentiation involved in neuromast regeneration)	NA	NA	NA
1	ENSDARG00000002710	ncl	10.69	8.71349	0.294941	4.68011e-16	1.29695e-11	nucleolin [Source:ZFIN;Acc:ZDB-GENE-030131-6986]	GO:0001947(heart looping);GO:0003676(nucleic acid binding);GO:0003723(RNA binding);GO:0003729(mRNA binding);GO:0005634(nucleus);GO:0005737(cytoplasm);GO:0006364(rRNA processing);GO:0009303(rRNA transcription);GO:0071014(post-mRNA release spliceosomal complex);GO:1990904(ribonucleoprotein complex);GO:2000815(regulation of mRNA stability involved in response to oxidative stress)	NA	K11294	NA
1	ENSDARG00000055290	mpeg1.1	3.19096	2.61533	0.286993	1.31702e-15	3.64972e-11	macrophage expressed 1, tandem duplicate 1 [Source:ZFIN;Acc:ZDB-GENE-030131-7347]	GO:0003674(molecular_function);GO:0016020(membrane);GO:0016021(integral component of membrane);GO:0042742(defense response to bacterium)	NA	NA	NA
1	ENSDARG00000098080	gnl2	0.535013	0.446613	0.260549	3.22566e-15	8.93894e-11	guanine nucleotide binding protein-like 2 (nucleolar) [Source:ZFIN;Acc:ZDB-GENE-040426-2317]	GO:0000166(nucleotide binding);GO:0000448(cleavage in ITS2 between 5.8S rRNA and LSU-rRNA of tricistronic rRNA transcript (SSU-rRNA, 5.8S rRNA, LSU-rRNA));GO:0003407(neural retina development);GO:0005525(GTP binding);GO:0005634(nucleus);GO:0005730(nucleolus);GO:0007096(regulation of exit from mitosis);GO:0045664(regulation of neuron differentiation)	03008(Ribosome biogenesis in eukaryotes)	K14537	NA
1	ENSDARG00000008502	pno1	2.87815	2.3226	0.309399	9.9281e-15	2.75127e-10	partner of NOB1 homolog [Source:ZFIN;Acc:ZDB-GENE-040426-1419]	GO:0003676(nucleic acid binding);GO:0003723(RNA binding)	NA	K11884	NA
1	ENSDARG00000040666	nifk	0.793669	0.657213	0.272178	1.15822e-14	3.20965e-10	nucleolar protein interacting with the FHA domain of MKI67 [Source:ZFIN;Acc:ZDB-GENE-021231-4]	GO:0003676(nucleic acid binding);GO:0003723(RNA binding);GO:0005634(nucleus);GO:0005730(nucleolus);GO:0007275(multicellular organism development)	NA	K14838	NA
1	ENSDARG00000074754	si:dkey-188i13.9	1.77018	1.30355	0.441444	1.36688e-14	3.78791e-10	si:dkey-188i13.9 [Source:ZFIN;Acc:ZDB-GENE-090313-211]	GO:0005739(mitochondrion);GO:0016020(membrane);GO:0016021(integral component of membrane)	NA	NA	NA
1	ENSDARG00000074217	si:dkey-188i13.6	1.56464	1.20178	0.380652	1.4628e-14	4.0537e-10	si:dkey-188i13.6 [Source:ZFIN;Acc:ZDB-GENE-030131-7410]	GO:0005739(mitochondrion);GO:0016021(integral component of membrane)	NA	NA	NA
1	ENSDARG00000070601	RASSF5	2.27829	1.80283	0.337685	1.62554e-14	4.50471e-10	si:dkey-85p17.3 [Source:ZFIN;Acc:ZDB-GENE-141219-8]	GO:0005856(cytoskeleton);GO:0007165(signal transduction);GO:0017016(Ras GTPase binding);GO:0035556(intracellular signal transduction);GO:0042981(regulation of apoptotic process);GO:0046872(metal ion binding)	04218(Cellular senescence)	K08015	NA
1	ENSDARG00000024561	nolc1	0.953513	0.777831	0.293796	3.11221e-14	8.62455e-10	nucleolar and coiled-body phosphoprotein 1 [Source:ZFIN;Acc:ZDB-GENE-030131-6349]	GO:0005654(nucleoplasm);GO:0005730(nucleolus);GO:0048701(embryonic cranial skeleton morphogenesis)	NA	NA	NA
1	ENSDARG00000059908	si:ch211-217k17.7	1.57877	1.27641	0.306708	4.69999e-14	1.30246e-09	si:ch211-217k17.7 [Source:ZFIN;Acc:ZDB-GENE-061009-11]	NA	NA	K14822	NA
1	ENSDARG00000003527	mak16	0.927881	0.767322	0.274108	7.93024e-14	2.19763e-09	MAK16 homolog (S. cerevisiae) [Source:ZFIN;Acc:ZDB-GENE-020419-35]	GO:0005634(nucleus);GO:0005730(nucleolus)	NA	K14831	NA
1	ENSDARG00000042864	rpl7l1	1.55621	1.25321	0.312413	8.56735e-14	2.37418e-09	ribosomal protein L7-like 1 [Source:ZFIN;Acc:ZDB-GENE-030131-970]	GO:0000463(maturation of LSU-rRNA from tricistronic rRNA transcript (SSU-rRNA, 5.8S rRNA, LSU-rRNA));GO:0003735(structural constituent of ribosome);GO:0005840(ribosome);GO:0022625(cytosolic large ribosomal subunit)	NA	NA	NA
1	ENSDARG00000098293	si:dkey-27i16.2	9.55311	7.37167	0.37398	6.06446e-13	1.68058e-08	si:dkey-27i16.2 [Source:ZFIN;Acc:ZDB-GENE-030131-9667]	GO:0051726(regulation of cell cycle)	NA	NA	NA
1	ENSDARG00000086374	isg15	9.40579	6.49791	0.533572	1.37881e-12	3.82096e-08	ISG15 ubiquitin-like modifier [Source:ZFIN;Acc:ZDB-GENE-021211-1]	GO:0005515(protein binding);GO:0005634(nucleus);GO:0005737(cytoplasm);GO:0016567(protein ubiquitination);GO:0019941(modification-dependent protein catabolic process);GO:0031386(protein tag);GO:0031625(ubiquitin protein ligase binding)	NA	NA	NA
1	ENSDARG00000030789	ddx18	1.03284	0.848889	0.282971	1.40779e-12	3.90128e-08	DEAD (Asp-Glu-Ala-Asp) box polypeptide 18 [Source:ZFIN;Acc:ZDB-GENE-030131-9685]	GO:0000166(nucleotide binding);GO:0003676(nucleic acid binding);GO:0003723(RNA binding);GO:0004386(helicase activity);GO:0005524(ATP binding);GO:0016787(hydrolase activity);GO:0030097(hemopoiesis);GO:0030099(myeloid cell differentiation)	NA	K13179	EC:3.6.4.13
1	ENSDARG00000023028	cdv3	2.28115	1.88414	0.275852	3.21552e-12	8.91084e-08	carnitine deficiency-associated gene expressed in ventricle 3 [Source:ZFIN;Acc:ZDB-GENE-030131-6034]	GO:0005737(cytoplasm)	NA	NA	NA
1	ENSDARG00000018146	gpx1a	4.50398	3.5503	0.343258	7.5493e-12	2.09206e-07	glutathione peroxidase 1a [Source:ZFIN;Acc:ZDB-GENE-030410-1]	GO:0004601(peroxidase activity);GO:0004602(glutathione peroxidase activity);GO:0005739(mitochondrion);GO:0005829(cytosol);GO:0006749(glutathione metabolic process);GO:0006979(response to oxidative stress);GO:0010269(response to selenium ion);GO:0016491(oxidoreductase activity);GO:0042542(response to hydrogen peroxide);GO:0042744(hydrogen peroxide catabolic process);GO:0055114(oxidation-reduction …	00480(Glutathione metabolism);00590(Arachidonic acid metabolism)	K00432	EC:1.11.1.9
1	ENSDARG00000033614	rasgef1ba	2.10002	1.31459	0.67579	1.19192e-11	3.30305e-07	RasGEF domain family, member 1Ba [Source:ZFIN;Acc:ZDB-GENE-030131-5783]	GO:0005085(guanyl-nucleotide exchange factor activity);GO:0005088(Ras guanyl-nucleotide exchange factor activity);GO:0005622(intracellular);GO:0007264(small GTPase mediated signal transduction);GO:0043547(positive regulation of GTPase activity)	NA	NA	NA
1	ENSDARG00000099465	rnf213a	3.92756	3.12226	0.331044	1.20261e-11	3.33266e-07	ring finger protein 213a [Source:ZFIN;Acc:ZDB-GENE-050302-100]	GO:0001525(angiogenesis);GO:0002040(sprouting angiogenesis);GO:0004842(ubiquitin-protein transferase activity);GO:0005737(cytoplasm);GO:0005829(cytosol);GO:0006511(ubiquitin-dependent protein catabolic process);GO:0008015(blood circulation);GO:0016567(protein ubiquitination);GO:0016740(transferase activity);GO:0016787(hydrolase activity);GO:0016887(ATPase activity);GO:0046872(metal ion binding)	NA	K22754	EC:2.3.2.27
1	ENSDARG00000045681	irf5	0.87535	0.714488	0.292949	2.32933e-11	6.45503e-07	interferon regulatory factor 5 [Source:ZFIN;Acc:ZDB-GENE-040426-2587]	GO:0000981(DNA-binding transcription factor activity, RNA polymerase II-specific);GO:0002376(immune system process);GO:0003700(DNA-binding transcription factor activity);GO:0005515(protein binding);GO:0005634(nucleus);GO:0006355(regulation of transcription, DNA-templated);GO:0006357(regulation of transcription by RNA polymerase II);GO:0019221(cytokine-mediated signaling pathway);GO:0044212(transc…	04620(Toll-like receptor signaling pathway)	K09446	NA
1	ENSDARG00000019307	dusp5	4.09592	3.15008	0.378797	3.36873e-11	9.33541e-07	dual specificity phosphatase 5 [Source:ZFIN;Acc:ZDB-GENE-010625-1]	GO:0000188(inactivation of MAPK activity);GO:0004721(phosphoprotein phosphatase activity);GO:0004725(protein tyrosine phosphatase activity);GO:0005634(nucleus);GO:0005737(cytoplasm);GO:0006470(protein dephosphorylation);GO:0008138(protein tyrosine/serine/threonine phosphatase activity);GO:0016311(dephosphorylation);GO:0016787(hydrolase activity);GO:0016791(phosphatase activity);GO:0017017(MAP kin…	04010(MAPK signaling pathway)	K04459	3.1.3.48;EC:3.1.3.16
1	ENSDARG00000025428	socs3a	2.61951	1.92209	0.446625	5.07384e-11	1.40606e-06	suppressor of cytokine signaling 3a [Source:ZFIN;Acc:ZDB-GENE-030131-7349]	GO:0005942(phosphatidylinositol 3-kinase complex);GO:0007259(receptor signaling pathway via JAK-STAT);GO:0016567(protein ubiquitination);GO:0031099(regeneration);GO:0035556(intracellular signal transduction);GO:0035677(posterior lateral line neuromast hair cell development);GO:0043066(negative regulation of apoptotic process);GO:0043551(regulation of phosphatidylinositol 3-kinase activity);GO:004…	NA	NA	NA
1	ENSDARG00000009511	tnfa	0.493511	0.396275	0.316581	1.09037e-10	3.02163e-06	tumor necrosis factor a (TNF superfamily, member 2) [Source:ZFIN;Acc:ZDB-GENE-050317-1]	GO:0001889(liver development);GO:0002237(response to molecule of bacterial origin);GO:0005125(cytokine activity);GO:0005164(tumor necrosis factor receptor binding);GO:0005515(protein binding);GO:0005615(extracellular space);GO:0006914(autophagy);GO:0006954(inflammatory response);GO:0006955(immune response);GO:0009615(response to virus);GO:0009617(response to bacterium);GO:0010469(regulation of si…	04010(MAPK signaling pathway);04060(Cytokine-cytokine receptor interaction);04150(mTOR signaling pathway);04210(Apoptosis);04217(Necroptosis);04350(TGF-beta signaling pathway);04620(Toll-like receptor signaling pathway);04621(NOD-like receptor signaling pathway);04622(RIG-I-like receptor signaling pathway);04625(C-type lectin receptor signaling pathway);04920(Adipocytokine signaling pathway);0493…	K03156	NA
1	ENSDARG00000032327	usp36	1.24061	1.02507	0.275327	5.21912e-10	1.44632e-05	ubiquitin specific peptidase 36 [Source:ZFIN;Acc:ZDB-GENE-030131-5450]	GO:0004197(cysteine-type endopeptidase activity);GO:0004843(thiol-dependent ubiquitin-specific protease activity);GO:0006511(ubiquitin-dependent protein catabolic process);GO:0016579(protein deubiquitination);GO:0036459(thiol-dependent ubiquitinyl hydrolase activity);GO:0042981(regulation of apoptotic process);GO:1904888(cranial skeletal system development)	NA	K11855	EC:3.4.19.12
1	ENSDARG00000006200	eif4g1a	1.98064	1.63787	0.274147	6.03579e-10	1.67264e-05	eukaryotic translation initiation factor 4 gamma, 1a [Source:ZFIN;Acc:ZDB-GENE-070112-702]	GO:0003723(RNA binding);GO:0003729(mRNA binding);GO:0003743(translation initiation factor activity);GO:0005515(protein binding);GO:0005575(cellular_component);GO:0006413(translational initiation);GO:0016281(eukaryotic translation initiation factor 4F complex)	03013(RNA transport)	K03260	NA
1	ENSDARG00000067566	sftpbb	3.13602	2.58763	0.277301	7.63377e-10	2.11547e-05	surfactant protein Bb [Source:ZFIN;Acc:ZDB-GENE-060526-155]	GO:0003676(nucleic acid binding);GO:0005764(lysosome);GO:0006629(lipid metabolic process);GO:0006665(sphingolipid metabolic process)	NA	NA	NA
1	ENSDARG00000035715	marcksl1b	6.94064	5.34794	0.376086	1.06754e-09	2.95835e-05	MARCKS-like 1b [Source:ZFIN;Acc:ZDB-GENE-040426-2315]	GO:0003407(neural retina development);GO:0005516(calmodulin binding);GO:0005737(cytoplasm);GO:0005856(cytoskeleton);GO:0005886(plasma membrane);GO:0007417(central nervous system development);GO:0016020(membrane);GO:0051216(cartilage development)	NA	NA	NA
1	ENSDARG00000090625	si:ch73-248e21.1	0.678407	0.561167	0.27372	1.12703e-09	3.12323e-05	si:ch73-248e21.1 [Source:ZFIN;Acc:ZDB-GENE-120215-198]	NA	NA	NA	NA
1	ENSDARG00000114345	si:dkey-28d5.5	0.736415	0.613684	0.263022	5.95768e-09	0.000165099	si:dkey-28d5.5 [Source:ZFIN;Acc:ZDB-GENE-060503-165]	NA	NA	NA	NA
1	ENSDARG00000008740	esf1	0.921789	0.768895	0.261651	1.20344e-08	0.000333496	ESF1, nucleolar pre-rRNA processing protein, homolog (S. cerevisiae) [Source:ZFIN;Acc:ZDB-GENE-030131-4917]	GO:0003723(RNA binding);GO:0005634(nucleus);GO:0006364(rRNA processing)	NA	NA	NA
1	ENSDARG00000103556	si:ch211-218g23.6	0.920036	0.717004	0.359709	2.52934e-08	0.000700931	si:ch211-218g23.6 [Source:ZFIN;Acc:ZDB-GENE-141216-449]	NA	NA	NA	NA
1	ENSDARG00000097032	si:ch211-256a21.4	0.884367	0.716522	0.303634	3.05804e-08	0.000847444	si:ch211-256a21.4 [Source:ZFIN;Acc:ZDB-GENE-131121-329]	GO:0016020(membrane);GO:0016021(integral component of membrane)	NA	NA	NA
1	ENSDARG00000039150	lgmn	2.17902	1.76376	0.305024	2.48578e-07	0.00688859	legumain [Source:ZFIN;Acc:ZDB-GENE-021030-1]	GO:0004197(cysteine-type endopeptidase activity);GO:0005773(vacuole);GO:0006508(proteolysis);GO:0006624(vacuolar protein processing);GO:0008233(peptidase activity);GO:0031103(axon regeneration);GO:0042246(tissue regeneration);GO:0051603(proteolysis involved in cellular protein catabolic process)	04142(Lysosome)	K01369	EC:3.4.22.34
1	ENSDARG00000094719	CR318588.3	5.90015	4.12384	0.516764	7.02621e-07	0.019471	uncharacterized LOC101884954 [Source:NCBI gene;Acc:101884954]	NA	NA	NA	NA
1	ENSDARG00000017489	ifi45	4.16667	3.46719	0.265127	8.06197e-07	0.0223413	interferon alpha inducible protein 45 [Source:ZFIN;Acc:ZDB-GENE-051030-98]	GO:0003674(molecular_function);GO:0005739(mitochondrion);GO:0008150(biological_process);GO:0016020(membrane);GO:0016021(integral component of membrane)	NA	NA	NA
1	ENSDARG00000045661	irf7	3.25841	2.64554	0.300605	2.0042e-06	0.0555403	interferon regulatory factor 7 [Source:ZFIN;Acc:ZDB-GENE-040426-1518]	GO:0000981(DNA-binding transcription factor activity, RNA polymerase II-specific);GO:0002376(immune system process);GO:0003700(DNA-binding transcription factor activity);GO:0005515(protein binding);GO:0005634(nucleus);GO:0006355(regulation of transcription, DNA-templated);GO:0006357(regulation of transcription by RNA polymerase II);GO:0009615(response to virus);GO:0030097(hemopoiesis);GO:0044212(…	04620(Toll-like receptor signaling pathway);04621(NOD-like receptor signaling pathway);04622(RIG-I-like receptor signaling pathway);04623(Cytosolic DNA-sensing pathway);05168(Herpes simplex virus 1 infection)	K09447	NA
1	ENSDARG00000027744	gadd45ba	4.65927	3.67033	0.344194	6.28645e-06	0.17421	growth arrest and DNA-damage-inducible, beta a [Source:ZFIN;Acc:ZDB-GENE-040426-1971]	GO:0000185(activation of MAPKKK activity);GO:0001756(somitogenesis);GO:0005634(nucleus);GO:0005737(cytoplasm);GO:0046686(response to cadmium ion);GO:0051597(response to methylmercury);GO:0051726(regulation of cell cycle)	04010(MAPK signaling pathway);04068(FoxO signaling pathway);04110(Cell cycle);04115(p53 signaling pathway);04210(Apoptosis);04218(Cellular senescence)	K04402	NA
1	ENSDARG00000102555	si:dkey-33i11.9	0.823224	0.658991	0.321027	4.41968e-05	1	si:dkey-33i11.9 [Source:ZFIN;Acc:ZDB-GENE-060503-262]	GO:0016020(membrane);GO:0016021(integral component of membrane)	NA	NA	NA
1	ENSDARG00000013598	tnfb	2.36907	1.95803	0.274918	0.000102196	1	tumor necrosis factor b (TNF superfamily, member 2) [Source:ZFIN;Acc:ZDB-GENE-050601-2]	GO:0001889(liver development);GO:0005125(cytokine activity);GO:0005164(tumor necrosis factor receptor binding);GO:0005515(protein binding);GO:0005615(extracellular space);GO:0006955(immune response);GO:0010469(regulation of signaling receptor activity);GO:0016020(membrane);GO:0016021(integral component of membrane)	04060(Cytokine-cytokine receptor interaction);05168(Herpes simplex virus 1 infection)	K05468	NA
1	ENSDARG00000054942	lgals2a	1.24794	0.993641	0.32875	0.000145246	1	lectin, galactoside-binding, soluble, 2a [Source:ZFIN;Acc:ZDB-GENE-050318-2]	GO:0001944(vasculature development);GO:0002040(sprouting angiogenesis);GO:0005575(cellular_component);GO:0016936(galactoside binding);GO:0030246(carbohydrate binding);GO:0043236(laminin binding);GO:0048741(skeletal muscle fiber development);GO:0050769(positive regulation of neurogenesis);GO:0090303(positive regulation of wound healing)	NA	NA	NA
2	ENSDARG00000056008	atp5mc1	6.14652	2.52091	1.28583	1.27833e-175	3.5425e-171	ATP synthase membrane subunit c locus 1 [Source:ZFIN;Acc:ZDB-GENE-040426-1966]	GO:0000276(mitochondrial proton-transporting ATP synthase complex, coupling factor F(o));GO:0006811(ion transport);GO:0008289(lipid binding);GO:0015078(proton transmembrane transporter activity);GO:0015986(ATP synthesis coupled proton transport);GO:0015991(ATP hydrolysis coupled proton transport);GO:0016020(membrane);GO:0016021(integral component of membrane);GO:0033177(proton-transporting two-se…	00190(Oxidative phosphorylation)	K02128	NA
2	ENSDARG00000103824	hint1	7.01843	3.00472	1.22392	1.16674e-167	3.23328e-163	histidine triad nucleotide binding protein 1 [Source:ZFIN;Acc:ZDB-GENE-040927-8]	GO:0003824(catalytic activity);GO:0005575(cellular_component)	NA	K02503	NA
2	ENSDARG00000053446	sub1a	5.35365	2.373	1.17381	1.79966e-167	4.98722e-163	SUB1 homolog, transcriptional regulator a [Source:ZFIN;Acc:ZDB-GENE-050522-151]	GO:0003677(DNA binding);GO:0003713(transcription coactivator activity);GO:0005634(nucleus);GO:0005667(transcription factor complex);GO:0006355(regulation of transcription, DNA-templated);GO:0060261(positive regulation of transcription initiation from RNA polymerase II promoter)	NA	NA	NA
2	ENSDARG00000015978	COX5B	9.84765	4.71019	1.06399	9.08866e-155	2.51865e-150	zgc:86599 [Source:ZFIN;Acc:ZDB-GENE-040625-180]	GO:0004129(cytochrome-c oxidase activity);GO:0005740(mitochondrial envelope);GO:0006123(mitochondrial electron transport, cytochrome c to oxygen);GO:0042776(mitochondrial ATP synthesis coupled proton transport)	00190(Oxidative phosphorylation);04260(Cardiac muscle contraction)	K02265	NA
2	ENSDARG00000013938	psmb3	5.06227	2.20974	1.19591	7.73317e-154	2.14302e-149	proteasome subunit beta 3 [Source:ZFIN;Acc:ZDB-GENE-040426-2682]	GO:0000502(proteasome complex);GO:0004175(endopeptidase activity);GO:0004298(threonine-type endopeptidase activity);GO:0005634(nucleus);GO:0005737(cytoplasm);GO:0005839(proteasome core complex);GO:0006508(proteolysis);GO:0008233(peptidase activity);GO:0010498(proteasomal protein catabolic process);GO:0010499(proteasomal ubiquitin-independent protein catabolic process);GO:0016787(hydrolase activit…	03050(Proteasome)	K02735	EC:3.4.25.1
2	ENSDARG00000009640	psmb1	4.7425	2.13403	1.15207	2.65141e-152	7.34759e-148	proteasome subunit beta 1 [Source:ZFIN;Acc:ZDB-GENE-040618-2]	GO:0000502(proteasome complex);GO:0004175(endopeptidase activity);GO:0004298(threonine-type endopeptidase activity);GO:0005634(nucleus);GO:0005737(cytoplasm);GO:0005839(proteasome core complex);GO:0006508(proteolysis);GO:0008233(peptidase activity);GO:0010498(proteasomal protein catabolic process);GO:0010499(proteasomal ubiquitin-independent protein catabolic process);GO:0016787(hydrolase activit…	03050(Proteasome)	K02732	EC:3.4.25.1
2	ENSDARG00000045776	cnbpa	3.62218	1.68018	1.10824	5.80526e-150	1.60875e-145	CCHC-type zinc finger, nucleic acid binding protein a [Source:ZFIN;Acc:ZDB-GENE-030131-5045]	GO:0003676(nucleic acid binding);GO:0003682(chromatin binding);GO:0003697(single-stranded DNA binding);GO:0003723(RNA binding);GO:0008270(zinc ion binding);GO:0014029(neural crest formation);GO:0014036(neural crest cell fate specification);GO:0045944(positive regulation of transcription by RNA polymerase II);GO:0048703(embryonic viscerocranium morphogenesis);GO:0050727(regulation of inflammatory …	NA	K09250	NA
2	ENSDARG00000039578	pa2g4a	2.73947	1.36305	1.00706	1.27186e-147	3.52457e-143	proliferation-associated 2G4, a [Source:ZFIN;Acc:ZDB-GENE-030616-161]	GO:0003676(nucleic acid binding);GO:0005730(nucleolus);GO:0005737(cytoplasm)	NA	NA	NA
2	ENSDARG00000086618	psma3	5.17194	2.32668	1.15243	5.29677e-147	1.46784e-142	proteasome subunit alpha 3 [Source:ZFIN;Acc:ZDB-GENE-050913-120]	GO:0000502(proteasome complex);GO:0004175(endopeptidase activity);GO:0004298(threonine-type endopeptidase activity);GO:0005634(nucleus);GO:0005737(cytoplasm);GO:0005839(proteasome core complex);GO:0006508(proteolysis);GO:0006511(ubiquitin-dependent protein catabolic process);GO:0008233(peptidase activity);GO:0010498(proteasomal protein catabolic process);GO:0010499(proteasomal ubiquitin-independe…	03050(Proteasome)	K02727	EC:3.4.25.1
2	ENSDARG00000011404	fen1	1.62316	0.924551	0.811979	8.63505e-147	2.39294e-142	flap structure-specific endonuclease 1 [Source:ZFIN;Acc:ZDB-GENE-031112-11]	GO:0000287(magnesium ion binding);GO:0003677(DNA binding);GO:0003824(catalytic activity);GO:0004518(nuclease activity);GO:0004519(endonuclease activity);GO:0004523(RNA-DNA hybrid ribonuclease activity);GO:0004527(exonuclease activity);GO:0005634(nucleus);GO:0005654(nucleoplasm);GO:0005730(nucleolus);GO:0005739(mitochondrion);GO:0006260(DNA replication);GO:0006281(DNA repair);GO:0006284(base-excis…	03030(DNA replication);03410(Base excision repair);03450(Non-homologous end-joining)	K04799	EC:3.-.-.-
2	ENSDARG00000102808	calr3b	4.52516	1.84603	1.29354	3.94212e-146	1.09244e-141	calreticulin 3b [Source:ZFIN;Acc:ZDB-GENE-030131-9907]	GO:0005509(calcium ion binding);GO:0005515(protein binding);GO:0005783(endoplasmic reticulum);GO:0006457(protein folding);GO:0046872(metal ion binding);GO:0051082(unfolded protein binding)	04141(Protein processing in endoplasmic reticulum);04145(Phagosome);05168(Herpes simplex virus 1 infection)	K08057	NA
2	ENSDARG00000003526	psma5	3.66642	1.77033	1.05035	6.55418e-146	1.8163e-141	proteasome subunit alpha 5 [Source:ZFIN;Acc:ZDB-GENE-040625-96]	GO:0000502(proteasome complex);GO:0004175(endopeptidase activity);GO:0004298(threonine-type endopeptidase activity);GO:0005634(nucleus);GO:0005737(cytoplasm);GO:0005839(proteasome core complex);GO:0006508(proteolysis);GO:0006511(ubiquitin-dependent protein catabolic process);GO:0008233(peptidase activity);GO:0010498(proteasomal protein catabolic process);GO:0010499(proteasomal ubiquitin-independe…	03050(Proteasome)	K02729	EC:3.4.25.1
2	ENSDARG00000070083	atp5f1b	9.4893	4.61781	1.03909	3.5133e-145	9.73606e-141	ATP synthase F1 subunit beta [Source:ZFIN;Acc:ZDB-GENE-030131-124]	GO:0000166(nucleotide binding);GO:0005524(ATP binding);GO:0006754(ATP biosynthetic process);GO:0015986(ATP synthesis coupled proton transport);GO:0045261(proton-transporting ATP synthase complex, catalytic core F(1));GO:0046034(ATP metabolic process);GO:0046933(proton-transporting ATP synthase activity, rotational mechanism);GO:0099132(ATP hydrolysis coupled cation transmembrane transport);GO:190…	00190(Oxidative phosphorylation)	K02133	EC:7.1.2.2
2	ENSDARG00000037229	denr	1.88354	1.09384	0.784041	6.01634e-143	1.66725e-138	density-regulated protein [Source:ZFIN;Acc:ZDB-GENE-040718-450]	GO:0001731(formation of translation preinitiation complex);GO:0002188(translation reinitiation);GO:0003729(mRNA binding);GO:0003743(translation initiation factor activity);GO:0006412(translation);GO:0006413(translational initiation)	NA	NA	NA
2	ENSDARG00000018491	pdia4	3.28735	1.35625	1.2773	9.15538e-141	2.53714e-136	protein disulfide isomerase family A, member 4 [Source:ZFIN;Acc:ZDB-GENE-030131-5493]	GO:0003756(protein disulfide isomerase activity);GO:0005783(endoplasmic reticulum);GO:0005788(endoplasmic reticulum lumen);GO:0006457(protein folding);GO:0009986(cell surface);GO:0016853(isomerase activity);GO:0034976(response to endoplasmic reticulum stress);GO:0045454(cell redox homeostasis)	04141(Protein processing in endoplasmic reticulum)	K09582	EC:5.3.4.1
2	ENSDARG00000010149	atp5fa1	6.4432	3.16121	1.0273	1.66058e-140	4.6018e-136	ATP synthase F1 subunit alpha [Source:ZFIN;Acc:ZDB-GENE-060201-1]	GO:0000166(nucleotide binding);GO:0000275(mitochondrial proton-transporting ATP synthase complex, catalytic core F(1));GO:0005524(ATP binding);GO:0006754(ATP biosynthetic process);GO:0006811(ion transport);GO:0006979(response to oxidative stress);GO:0015986(ATP synthesis coupled proton transport);GO:0016887(ATPase activity);GO:0022900(electron transport chain);GO:0032559(adenyl ribonucleotide bin…	00190(Oxidative phosphorylation)	K02132	NA
2	ENSDARG00000106529	dut	4.39893	1.94363	1.1784	2.15408e-140	5.96938e-136	deoxyuridine triphosphatase [Source:ZFIN;Acc:ZDB-GENE-041010-93]	GO:0004170(dUTP diphosphatase activity);GO:0046080(dUTP metabolic process)	00240(Pyrimidine metabolism);00983(Drug metabolism - other enzymes)	K01520	EC:3.6.1.23
2	ENSDARG00000070959	si:ch211-288g17.3	5.07112	2.41847	1.06821	1.03655e-139	2.87248e-135	si:ch211-288g17.3 [Source:ZFIN;Acc:ZDB-GENE-030131-461]	GO:0003677(DNA binding)	NA	NA	NA
2	ENSDARG00000031795	abcf1	2.61025	1.4335	0.864643	1.41786e-138	3.92918e-134	ATP-binding cassette, sub-family F (GCN20), member 1 [Source:ZFIN;Acc:ZDB-GENE-050517-31]	GO:0000166(nucleotide binding);GO:0005524(ATP binding);GO:0016887(ATPase activity)	NA	K06184	NA
2	ENSDARG00000037318	ddost	2.93618	1.38622	1.08278	2.88442e-138	7.9933e-134	dolichyl-diphosphooligosaccharide--protein glycosyltransferase subunit (non-catalytic) [Source:ZFIN;Acc:ZDB-GENE-040426-2147]	GO:0005783(endoplasmic reticulum);GO:0005789(endoplasmic reticulum membrane);GO:0006486(protein glycosylation);GO:0016020(membrane);GO:0016021(integral component of membrane);GO:0018279(protein N-linked glycosylation via asparagine)	00510(N-Glycan biosynthesis);04141(Protein processing in endoplasmic reticulum)	K12670	NA
2	ENSDARG00000103994	ppiab	20.327	12.0222	0.757692	3.77515e-137	1.04617e-132	peptidylprolyl isomerase Ab (cyclophilin A) [Source:ZFIN;Acc:ZDB-GENE-030131-7459]	GO:0000413(protein peptidyl-prolyl isomerization);GO:0001666(response to hypoxia);GO:0003755(peptidyl-prolyl cis-trans isomerase activity);GO:0005575(cellular_component);GO:0006457(protein folding);GO:0016018(cyclosporin A binding);GO:0016853(isomerase activity);GO:0042026(protein refolding);GO:0051082(unfolded protein binding)	04217(Necroptosis)	K03767	EC:5.2.1.8
2	ENSDARG00000002613	rpa3	1.52492	0.926695	0.71857	7.13303e-137	1.97671e-132	replication protein A3 [Source:ZFIN;Acc:ZDB-GENE-040426-977]	GO:0000724(double-strand break repair via homologous recombination);GO:0003677(DNA binding);GO:0003684(damaged DNA binding);GO:0003697(single-stranded DNA binding);GO:0005634(nucleus);GO:0005662(DNA replication factor A complex);GO:0006260(DNA replication);GO:0006281(DNA repair);GO:0006284(base-excision repair);GO:0006289(nucleotide-excision repair);GO:0006298(mismatch repair);GO:0006310(DNA reco…	03030(DNA replication);03420(Nucleotide excision repair);03430(Mismatch repair);03440(Homologous recombination);03460(Fanconi anemia pathway)	K10740	NA
2	ENSDARG00000053990	hmgb2b	10.311	4.23929	1.28229	1.08338e-136	3.00226e-132	high mobility group box 2b [Source:ZFIN;Acc:ZDB-GENE-040912-122]	GO:0000790(nuclear chromatin);GO:0003677(DNA binding);GO:0005634(nucleus);GO:0005737(cytoplasm);GO:0006310(DNA recombination);GO:0006338(chromatin remodeling);GO:0006357(regulation of transcription by RNA polymerase II);GO:0008134(transcription factor binding);GO:0008301(DNA binding, bending);GO:0045089(positive regulation of innate immune response);GO:0045944(positive regulation of transcription…	NA	K11295	NA
2	ENSDARG00000102798	mcm2	2.21383	1.09946	1.00974	3.2336e-136	8.96096e-132	minichromosome maintenance complex component 2 [Source:ZFIN;Acc:ZDB-GENE-020419-24]	GO:0000166(nucleotide binding);GO:0003677(DNA binding);GO:0003682(chromatin binding);GO:0004386(helicase activity);GO:0005524(ATP binding);GO:0005634(nucleus);GO:0006260(DNA replication);GO:0006270(DNA replication initiation);GO:0016787(hydrolase activity);GO:0042555(MCM complex);GO:0048538(thymus development);GO:0060041(retina development in camera-type eye);GO:1905775(negative regulation of DNA…	03030(DNA replication);04110(Cell cycle)	K02540	EC:3.6.4.12
2	ENSDARG00000103979	calr3a	2.43665	1.24725	0.966144	2.27539e-135	6.30555e-131	calreticulin 3a [Source:ZFIN;Acc:ZDB-GENE-000208-17]	GO:0005509(calcium ion binding);GO:0005515(protein binding);GO:0005783(endoplasmic reticulum);GO:0006457(protein folding);GO:0046872(metal ion binding);GO:0051082(unfolded protein binding)	04141(Protein processing in endoplasmic reticulum);04145(Phagosome);05168(Herpes simplex virus 1 infection)	K08057	NA
2	ENSDARG00000018124	psmd3	2.00035	1.12761	0.826985	4.4485e-135	1.23277e-130	proteasome 26S subunit, non-ATPase 3 [Source:ZFIN;Acc:ZDB-GENE-040426-1444]	GO:0000502(proteasome complex);GO:0006511(ubiquitin-dependent protein catabolic process);GO:0007417(central nervous system development);GO:0007420(brain development);GO:0008345(larval locomotory behavior);GO:0008541(proteasome regulatory particle, lid subcomplex);GO:0030234(enzyme regulator activity);GO:0042176(regulation of protein catabolic process);GO:0050790(regulation of catalytic activity);…	03050(Proteasome)	K03033	NA
2	ENSDARG00000037397	ssrp1a	1.4145	0.874223	0.694219	6.84881e-135	1.89794e-130	structure specific recognition protein 1a [Source:ZFIN;Acc:ZDB-GENE-031118-9]	GO:0003677(DNA binding);GO:0005634(nucleus);GO:0005694(chromosome);GO:0006260(DNA replication);GO:0006281(DNA repair);GO:0006974(cellular response to DNA damage stimulus);GO:0051726(regulation of cell cycle)	NA	K09272	NA
2	ENSDARG00000040041	mcm4	1.46228	0.851854	0.779544	1.08249e-134	2.99979e-130	minichromosome maintenance complex component 4 [Source:ZFIN;Acc:ZDB-GENE-030131-9544]	GO:0000166(nucleotide binding);GO:0001878(response to yeast);GO:0003677(DNA binding);GO:0003678(DNA helicase activity);GO:0003682(chromatin binding);GO:0004386(helicase activity);GO:0005524(ATP binding);GO:0005634(nucleus);GO:0006260(DNA replication);GO:0006270(DNA replication initiation);GO:0016787(hydrolase activity);GO:0032508(DNA duplex unwinding);GO:0042555(MCM complex)	03030(DNA replication);04110(Cell cycle)	K02212	EC:3.6.4.12
2	ENSDARG00000004169	stmn1a	3.69706	1.7491	1.07977	1.47345e-134	4.08323e-130	stathmin 1a [Source:ZFIN;Acc:ZDB-GENE-031006-14]	GO:0005737(cytoplasm);GO:0007019(microtubule depolymerization);GO:0015631(tubulin binding);GO:0031110(regulation of microtubule polymerization or depolymerization);GO:0031175(neuron projection development);GO:0043005(neuron projection);GO:0051493(regulation of cytoskeleton organization)	NA	NA	NA
2	ENSDARG00000003570	hsp90b1	10.9306	3.495	1.64501	1.78819e-134	4.95543e-130	heat shock protein 90, beta (grp94), member 1 [Source:ZFIN;Acc:ZDB-GENE-031002-1]	GO:0001666(response to hypoxia);GO:0005515(protein binding);GO:0005524(ATP binding);GO:0005783(endoplasmic reticulum);GO:0006457(protein folding);GO:0048471(perinuclear region of cytoplasm);GO:0050830(defense response to Gram-positive bacterium);GO:0051082(unfolded protein binding)	04141(Protein processing in endoplasmic reticulum)	K09487	NA
2	ENSDARG00000035993	sumo3b	1.40425	0.87422	0.68373	1.84683e-134	5.11794e-130	small ubiquitin-like modifier 3b [Source:ZFIN;Acc:ZDB-GENE-040718-426]	GO:0005515(protein binding);GO:0005634(nucleus);GO:0016925(protein sumoylation)	03013(RNA transport)	K12160	NA
2	ENSDARG00000062152	chaf1a	2.06463	1.14024	0.856539	4.03727e-134	1.11881e-129	chromatin assembly factor 1, subunit A (p150) [Source:ZFIN;Acc:ZDB-GENE-030131-5366]	GO:0005634(nucleus);GO:0006260(DNA replication);GO:0006281(DNA repair);GO:0006334(nucleosome assembly);GO:0006974(cellular response to DNA damage stimulus);GO:0007049(cell cycle);GO:0031497(chromatin assembly);GO:0033186(CAF-1 complex)	NA	K10750	NA
2	ENSDARG00000061187	cbx5	1.46784	0.916269	0.679848	9.00332e-134	2.495e-129	chromobox homolog 5 (HP1 alpha homolog, Drosophila) [Source:ZFIN;Acc:ZDB-GENE-030131-5553]	GO:0005634(nucleus)	NA	K11587	NA
2	ENSDARG00000014915	ndufab1b	1.92635	1.08712	0.825367	2.25315e-133	6.24392e-129	NADH:ubiquinone oxidoreductase subunit AB1b [Source:ZFIN;Acc:ZDB-GENE-030131-4437]	GO:0000035(acyl binding);GO:0000036(acyl carrier activity);GO:0005739(mitochondrion);GO:0005747(mitochondrial respiratory chain complex I);GO:0006633(fatty acid biosynthetic process)	00190(Oxidative phosphorylation)	K03955	NA
2	ENSDARG00000097102	si:ch73-281n10.2	4.2575	1.84417	1.20704	3.59916e-133	9.97398e-129	si:ch73-281n10.2 [Source:ZFIN;Acc:ZDB-GENE-131120-172]	GO:0000785(chromatin);GO:0005634(nucleus);GO:0031492(nucleosomal DNA binding)	NA	NA	NA
2	ENSDARG00000116491	h2afvb	12.3454	5.70351	1.11404	9.35972e-132	2.59377e-127	H2A histone family, member Vb [Source:ZFIN;Acc:ZDB-GENE-050506-24]	GO:0000786(nucleosome);GO:0000790(nuclear chromatin);GO:0003677(DNA binding);GO:0005634(nucleus);GO:0005694(chromosome);GO:0006325(chromatin organization);GO:0043045(DNA methylation involved in embryo development);GO:0046982(protein heterodimerization activity)	04217(Necroptosis)	K11251	NA
2	ENSDARG00000043899	psma6l	1.68505	1.04342	0.691469	2.21613e-131	6.14133e-127	proteasome subunit alpha 6, like [Source:ZFIN;Acc:ZDB-GENE-010502-2]	GO:0000502(proteasome complex);GO:0004175(endopeptidase activity);GO:0004298(threonine-type endopeptidase activity);GO:0005634(nucleus);GO:0005737(cytoplasm);GO:0005839(proteasome core complex);GO:0006508(proteolysis);GO:0006511(ubiquitin-dependent protein catabolic process);GO:0008233(peptidase activity);GO:0010498(proteasomal protein catabolic process);GO:0010499(proteasomal ubiquitin-independe…	03050(Proteasome)	K02730	EC:3.4.25.1
2	ENSDARG00000099663	cox5ab	3.27495	1.73205	0.918989	1.68432e-130	4.6676e-126	cytochrome c oxidase subunit 5Ab [Source:ZFIN;Acc:ZDB-GENE-030131-5162]	GO:0004129(cytochrome-c oxidase activity);GO:0005743(mitochondrial inner membrane);GO:0005751(mitochondrial respiratory chain complex IV);GO:0006123(mitochondrial electron transport, cytochrome c to oxygen);GO:0021522(spinal cord motor neuron differentiation);GO:0048568(embryonic organ development);GO:1902600(proton transmembrane transport)	00190(Oxidative phosphorylation);04260(Cardiac muscle contraction)	K02264	NA
2	ENSDARG00000036995	lsm6	1.67686	1.00615	0.736911	1.76198e-130	4.88281e-126	LSM6 homolog, U6 small nuclear RNA and mRNA degradation associated [Source:ZFIN;Acc:ZDB-GENE-040625-50]	GO:0000398(mRNA splicing, via spliceosome);GO:0000932(P-body);GO:0003723(RNA binding);GO:0005634(nucleus);GO:0005681(spliceosomal complex);GO:0005688(U6 snRNP);GO:0005730(nucleolus);GO:0005732(small nucleolar ribonucleoprotein complex);GO:0006397(mRNA processing);GO:0008380(RNA splicing);GO:0030490(maturation of SSU-rRNA);GO:0046540(U4/U6 x U5 tri-snRNP complex)	03018(RNA degradation);03040(Spliceosome)	K12625	NA
2	ENSDARG00000009001	pdia6	3.77078	1.53144	1.29997	9.18987e-129	2.5467e-124	protein disulfide isomerase family A, member 6 [Source:ZFIN;Acc:ZDB-GENE-030131-879]	GO:0005623(cell);GO:0016853(isomerase activity);GO:0045454(cell redox homeostasis)	04141(Protein processing in endoplasmic reticulum)	K09584	EC:5.3.4.1
2	ENSDARG00000101624	lmnb2	1.21413	0.836279	0.537865	9.85584e-129	2.73125e-124	lamin B2 [Source:ZFIN;Acc:ZDB-GENE-990630-13]	GO:0005198(structural molecule activity);GO:0005635(nuclear envelope);GO:0005882(intermediate filament)	04210(Apoptosis)	K07611	NA
2	ENSDARG00000022438	cox6a1	6.17027	3.05924	1.01216	1.12398e-128	3.11478e-124	cytochrome c oxidase subunit 6A1 [Source:ZFIN;Acc:ZDB-GENE-030131-7715]	GO:0004129(cytochrome-c oxidase activity);GO:0005739(mitochondrion);GO:0005743(mitochondrial inner membrane);GO:0005751(mitochondrial respiratory chain complex IV);GO:0006123(mitochondrial electron transport, cytochrome c to oxygen);GO:0009060(aerobic respiration);GO:0016020(membrane);GO:0030234(enzyme regulator activity);GO:0050790(regulation of catalytic activity);GO:1902600(proton transmembran…	00190(Oxidative phosphorylation);04260(Cardiac muscle contraction)	K02266	NA
2	ENSDARG00000054696	psmb4	3.57286	1.87821	0.927722	1.25078e-128	3.46615e-124	proteasome subunit beta 4 [Source:ZFIN;Acc:ZDB-GENE-050417-333]	GO:0000502(proteasome complex);GO:0004175(endopeptidase activity);GO:0004298(threonine-type endopeptidase activity);GO:0005634(nucleus);GO:0005737(cytoplasm);GO:0005839(proteasome core complex);GO:0006508(proteolysis);GO:0008233(peptidase activity);GO:0010498(proteasomal protein catabolic process);GO:0010499(proteasomal ubiquitin-independent protein catabolic process);GO:0016787(hydrolase activit…	03050(Proteasome)	K02736	EC:3.4.25.1
2	ENSDARG00000104173	tufm	0.785956	0.585255	0.425383	1.75627e-128	4.86698e-124	Tu translation elongation factor, mitochondrial [Source:ZFIN;Acc:ZDB-GENE-050320-73]	GO:0000166(nucleotide binding);GO:0003746(translation elongation factor activity);GO:0003924(GTPase activity);GO:0005525(GTP binding);GO:0005622(intracellular);GO:0005739(mitochondrion);GO:0006414(translational elongation);GO:0070125(mitochondrial translational elongation)	NA	K02358	NA
2	ENSDARG00000013250	tars	1.24017	0.816448	0.603109	2.92806e-128	8.11424e-124	threonyl-tRNA synthetase [Source:ZFIN;Acc:ZDB-GENE-041010-218]	GO:0000166(nucleotide binding);GO:0001569(branching involved in blood vessel morphogenesis);GO:0001944(vasculature development);GO:0004812(aminoacyl-tRNA ligase activity);GO:0004829(threonine-tRNA ligase activity);GO:0005524(ATP binding);GO:0005737(cytoplasm);GO:0006418(tRNA aminoacylation for protein translation);GO:0006435(threonyl-tRNA aminoacylation);GO:0043039(tRNA aminoacylation);GO:1903670…	00970(Aminoacyl-tRNA biosynthesis)	K01868	EC:6.1.1.3
2	ENSDARG00000031511	psmb2	3.60053	1.86297	0.950604	1.48414e-127	4.11285e-123	proteasome subunit beta 2 [Source:ZFIN;Acc:ZDB-GENE-040718-353]	GO:0000502(proteasome complex);GO:0004175(endopeptidase activity);GO:0004298(threonine-type endopeptidase activity);GO:0005634(nucleus);GO:0005737(cytoplasm);GO:0005839(proteasome core complex);GO:0006508(proteolysis);GO:0008233(peptidase activity);GO:0010498(proteasomal protein catabolic process);GO:0010499(proteasomal ubiquitin-independent protein catabolic process);GO:0016787(hydrolase activit…	03050(Proteasome)	K02734	EC:3.4.25.1
2	ENSDARG00000013333	ndufa10	1.36066	0.850699	0.677582	2.01408e-127	5.58141e-123	NADH:ubiquinone oxidoreductase subunit A10 [Source:ZFIN;Acc:ZDB-GENE-030131-670]	GO:0005737(cytoplasm);GO:0005739(mitochondrion);GO:0005747(mitochondrial respiratory chain complex I);GO:0005759(mitochondrial matrix);GO:0006120(mitochondrial electron transport, NADH to ubiquinone);GO:0055114(oxidation-reduction process);GO:0070469(respirasome)	00190(Oxidative phosphorylation)	K03954	NA
2	ENSDARG00000016239	psmd13	1.28743	0.844725	0.60794	2.93488e-127	8.13313e-123	proteasome 26S subunit, non-ATPase 13 [Source:ZFIN;Acc:ZDB-GENE-040426-1004]	GO:0000502(proteasome complex);GO:0005198(structural molecule activity);GO:0005634(nucleus);GO:0005829(cytosol);GO:0006511(ubiquitin-dependent protein catabolic process);GO:0008541(proteasome regulatory particle, lid subcomplex);GO:0030097(hemopoiesis);GO:0043248(proteasome assembly)	03050(Proteasome)	K03039	NA
2	ENSDARG00000087640	nsfl1c	1.11949	0.752122	0.573797	4.763e-127	1.31992e-122	NSFL1 (p97) cofactor (p47) [Source:ZFIN;Acc:ZDB-GENE-041114-160]	GO:0000045(autophagosome assembly);GO:0005515(protein binding);GO:0005829(cytosol);GO:0007030(Golgi organization);GO:0031468(nuclear envelope reassembly);GO:0043130(ubiquitin binding);GO:0043161(proteasome-mediated ubiquitin-dependent protein catabolic process);GO:0061025(membrane fusion)	04141(Protein processing in endoplasmic reticulum)	K14012	NA
2	ENSDARG00000043781	psmb10	1.89726	1.13164	0.745498	7.57308e-127	2.09865e-122	proteasome subunit beta 10 [Source:ZFIN;Acc:ZDB-GENE-040718-278]	GO:0000502(proteasome complex);GO:0002376(immune system process);GO:0004175(endopeptidase activity);GO:0004298(threonine-type endopeptidase activity);GO:0005634(nucleus);GO:0005737(cytoplasm);GO:0005839(proteasome core complex);GO:0006508(proteolysis);GO:0008233(peptidase activity);GO:0010498(proteasomal protein catabolic process);GO:0010499(proteasomal ubiquitin-independent protein catabolic pro…	03050(Proteasome)	K02739	EC:3.4.25.1
2	ENSDARG00000020101	psmc2	1.06946	0.718933	0.572951	5.8829e-126	1.63027e-121	proteasome 26S subunit, ATPase 2 [Source:ZFIN;Acc:ZDB-GENE-040426-1327]	GO:0000166(nucleotide binding);GO:0000502(proteasome complex);GO:0005524(ATP binding);GO:0005737(cytoplasm);GO:0008540(proteasome regulatory particle, base subcomplex);GO:0016787(hydrolase activity);GO:0017025(TBP-class protein binding);GO:0030163(protein catabolic process);GO:0036402(proteasome-activating ATPase activity);GO:0043197(dendritic spine);GO:0045899(positive regulation of RNA polymera…	03050(Proteasome)	K03061	NA
2	ENSDARG00000019398	psma6a	1.33034	0.84312	0.657989	1.65038e-125	4.57354e-121	proteasome subunit alpha 6a [Source:ZFIN;Acc:ZDB-GENE-020326-1]	GO:0000502(proteasome complex);GO:0004175(endopeptidase activity);GO:0004298(threonine-type endopeptidase activity);GO:0005634(nucleus);GO:0005737(cytoplasm);GO:0005839(proteasome core complex);GO:0006508(proteolysis);GO:0006511(ubiquitin-dependent protein catabolic process);GO:0008233(peptidase activity);GO:0010498(proteasomal protein catabolic process);GO:0010499(proteasomal ubiquitin-independe…	03050(Proteasome)	K02730	EC:3.4.25.1
2	ENSDARG00000023330	anp32b	3.95682	1.92521	1.03933	1.92448e-125	5.33313e-121	acidic (leucine-rich) nuclear phosphoprotein 32 family, member B [Source:ZFIN;Acc:ZDB-GENE-030131-719]	GO:0005515(protein binding);GO:0005634(nucleus);GO:0042393(histone binding)	NA	K18647	NA
2	ENSDARG00000040440	snrpd2	2.86749	1.5515	0.886127	2.15184e-125	5.96319e-121	small nuclear ribonucleoprotein D2 polypeptide [Source:ZFIN;Acc:ZDB-GENE-040914-10]	GO:0000387(spliceosomal snRNP assembly);GO:0005634(nucleus);GO:0005682(U5 snRNP);GO:0005685(U1 snRNP);GO:0005686(U2 snRNP);GO:0006397(mRNA processing);GO:0008380(RNA splicing);GO:0030532(small nuclear ribonucleoprotein complex);GO:0046540(U4/U6 x U5 tri-snRNP complex);GO:0071013(catalytic step 2 spliceosome)	03040(Spliceosome)	K11096	NA
2	ENSDARG00000076290	calr	2.39068	1.26093	0.922928	4.02044e-125	1.11414e-120	calreticulin [Source:ZFIN;Acc:ZDB-GENE-030131-4042]	GO:0005509(calcium ion binding);GO:0005515(protein binding);GO:0005783(endoplasmic reticulum);GO:0006457(protein folding);GO:0046872(metal ion binding);GO:0051082(unfolded protein binding)	04141(Protein processing in endoplasmic reticulum);04145(Phagosome);05168(Herpes simplex virus 1 infection)	K08057	NA
2	ENSDARG00000032296	pomp	4.40706	2.2171	0.99114	4.6174e-125	1.27957e-120	proteasome maturation protein [Source:ZFIN;Acc:ZDB-GENE-040801-10]	GO:0003674(molecular_function);GO:0005634(nucleus);GO:0005737(cytoplasm);GO:0043248(proteasome assembly)	03050(Proteasome)	K11599	NA
2	ENSDARG00000071573	lsm5	1.19016	0.828785	0.522081	5.22663e-125	1.4484e-120	LSM5 homolog, U6 small nuclear RNA and mRNA degradation associated [Source:ZFIN;Acc:ZDB-GENE-070822-23]	GO:0003723(RNA binding);GO:0005634(nucleus);GO:0005681(spliceosomal complex);GO:0005688(U6 snRNP);GO:0006397(mRNA processing);GO:0008380(RNA splicing);GO:0046540(U4/U6 x U5 tri-snRNP complex);GO:1990726(Lsm1-7-Pat1 complex)	03018(RNA degradation);03040(Spliceosome)	K12624	NA
2	ENSDARG00000008447	fkbp4	0.574847	0.457369	0.329821	8.80411e-125	2.4398e-120	FKBP prolyl isomerase 4 [Source:ZFIN;Acc:ZDB-GENE-030131-514]	GO:0000413(protein peptidyl-prolyl isomerization);GO:0003755(peptidyl-prolyl cis-trans isomerase activity);GO:0005515(protein binding);GO:0005528(FK506 binding);GO:0005737(cytoplasm);GO:0016853(isomerase activity);GO:0031072(heat shock protein binding);GO:0061077(chaperone-mediated protein folding)	NA	K09571	EC:5.2.1.8
2	ENSDARG00000092798	ppib	8.24147	3.52908	1.22361	1.01774e-124	2.82037e-120	peptidylprolyl isomerase B (cyclophilin B) [Source:ZFIN;Acc:ZDB-GENE-040426-1955]	GO:0000413(protein peptidyl-prolyl isomerization);GO:0003755(peptidyl-prolyl cis-trans isomerase activity);GO:0005518(collagen binding);GO:0005575(cellular_component);GO:0006457(protein folding);GO:0016018(cyclosporin A binding);GO:0016853(isomerase activity);GO:0042026(protein refolding);GO:0051082(unfolded protein binding)	NA	K03768	EC:5.2.1.8
2	ENSDARG00000045843	apex1	0.706024	0.512287	0.462765	1.73771e-124	4.81554e-120	APEX nuclease (multifunctional DNA repair enzyme) 1 [Source:ZFIN;Acc:ZDB-GENE-040426-2761]	GO:0003677(DNA binding);GO:0004518(nuclease activity);GO:0004519(endonuclease activity);GO:0005622(intracellular);GO:0005634(nucleus);GO:0005737(cytoplasm);GO:0005739(mitochondrion);GO:0006281(DNA repair);GO:0006974(cellular response to DNA damage stimulus);GO:0016787(hydrolase activity);GO:0016829(lyase activity);GO:0046872(metal ion binding);GO:0090305(nucleic acid phosphodiester bond hydrolysi…	03410(Base excision repair)	K10771	EC:4.2.99.18
2	ENSDARG00000028889	ndufb10	1.80124	1.08377	0.732934	2.78175e-124	7.7088e-120	NADH:ubiquinone oxidoreductase subunit B10 [Source:ZFIN;Acc:ZDB-GENE-040426-1691]	GO:0005747(mitochondrial respiratory chain complex I)	00190(Oxidative phosphorylation)	K03966	NA
2	ENSDARG00000057414	phb	1.11562	0.743431	0.585572	5.79571e-124	1.60611e-119	prohibitin [Source:ZFIN;Acc:ZDB-GENE-030131-6577]	GO:0016020(membrane)	NA	K17080	NA
2	ENSDARG00000060041	lig1	1.5836	0.973921	0.70133	6.42809e-124	1.78135e-119	ligase I, DNA, ATP-dependent [Source:ZFIN;Acc:ZDB-GENE-110404-2]	GO:0000166(nucleotide binding);GO:0003677(DNA binding);GO:0003909(DNA ligase activity);GO:0003910(DNA ligase (ATP) activity);GO:0005524(ATP binding);GO:0005634(nucleus);GO:0005737(cytoplasm);GO:0005739(mitochondrion);GO:0006260(DNA replication);GO:0006273(lagging strand elongation);GO:0006281(DNA repair);GO:0006310(DNA recombination);GO:0006974(cellular response to DNA damage stimulus);GO:0016874…	03030(DNA replication);03410(Base excision repair);03420(Nucleotide excision repair);03430(Mismatch repair)	K10747	6.5.1.6;6.5.1.7;EC:6.5.1.1
2	ENSDARG00000104837	nudc	1.57565	0.962022	0.711804	7.13942e-124	1.97848e-119	nudC nuclear distribution protein [Source:ZFIN;Acc:ZDB-GENE-040426-899]	GO:0005737(cytoplasm);GO:0006457(protein folding);GO:0032502(developmental process);GO:0051082(unfolded protein binding);GO:0060271(cilium assembly);GO:0061371(determination of heart left/right asymmetry)	NA	NA	NA
2	ENSDARG00000105037	snrpf	4.70986	2.33565	1.01186	9.6224e-124	2.66656e-119	small nuclear ribonucleoprotein polypeptide F [Source:ZFIN;Acc:ZDB-GENE-040930-9]	GO:0000387(spliceosomal snRNP assembly);GO:0000398(mRNA splicing, via spliceosome);GO:0003723(RNA binding);GO:0005634(nucleus);GO:0005681(spliceosomal complex);GO:0005685(U1 snRNP);GO:0005732(small nucleolar ribonucleoprotein complex);GO:0006397(mRNA processing);GO:0008380(RNA splicing);GO:0071013(catalytic step 2 spliceosome)	03040(Spliceosome)	K11098	NA
2	ENSDARG00000110608	CABZ01115113.1	1.73332	1.01545	0.771415	1.5426e-123	4.27485e-119	proteasome (prosome, macropain) assembly chaperone 4 [Source:NCBI gene;Acc:100333944]	GO:0043248(proteasome assembly)	NA	K11878	NA
2	ENSDARG00000089663	lsm3	1.47612	0.952887	0.631437	2.03306e-123	5.63401e-119	LSM3 homolog, U6 small nuclear RNA and mRNA degradation associated [Source:ZFIN;Acc:ZDB-GENE-161207-2]	GO:0000398(mRNA splicing, via spliceosome);GO:0000932(P-body);GO:0000956(nuclear-transcribed mRNA catabolic process);GO:0003723(RNA binding);GO:0005634(nucleus);GO:0005681(spliceosomal complex);GO:0005688(U6 snRNP);GO:0006397(mRNA processing);GO:0008380(RNA splicing);GO:0033962(cytoplasmic mRNA processing body assembly);GO:0046540(U4/U6 x U5 tri-snRNP complex);GO:0071013(catalytic step 2 spliceos…	03018(RNA degradation);03040(Spliceosome)	K12622	NA
2	ENSDARG00000098972	mrps16	0.619063	0.47797	0.373164	2.05381e-123	5.69152e-119	mitochondrial ribosomal protein S16 [Source:ZFIN;Acc:ZDB-GENE-041010-123]	GO:0003735(structural constituent of ribosome);GO:0005622(intracellular);GO:0005763(mitochondrial small ribosomal subunit);GO:0005840(ribosome);GO:0006412(translation)	03010(Ribosome)	K02959	NA
2	ENSDARG00000020454	psmd8	1.56793	0.972898	0.688502	3.00567e-123	8.32932e-119	proteasome 26S subunit, non-ATPase 8 [Source:ZFIN;Acc:ZDB-GENE-040625-136]	GO:0003674(molecular_function);GO:0005829(cytosol);GO:0005838(proteasome regulatory particle);GO:0006508(proteolysis);GO:0008541(proteasome regulatory particle, lid subcomplex);GO:0043161(proteasome-mediated ubiquitin-dependent protein catabolic process)	03050(Proteasome)	K03031	NA
2	ENSDARG00000059070	gars	1.59768	1.02815	0.635928	5.73223e-123	1.58852e-118	glycyl-tRNA synthetase [Source:ZFIN;Acc:ZDB-GENE-030131-9174]	GO:0000166(nucleotide binding);GO:0004812(aminoacyl-tRNA ligase activity);GO:0004820(glycine-tRNA ligase activity);GO:0005524(ATP binding);GO:0005737(cytoplasm);GO:0005739(mitochondrion);GO:0006412(translation);GO:0006418(tRNA aminoacylation for protein translation);GO:0006426(glycyl-tRNA aminoacylation);GO:0070150(mitochondrial glycyl-tRNA aminoacylation)	00970(Aminoacyl-tRNA biosynthesis)	K01880	EC:6.1.1.14
2	ENSDARG00000070108	dek	1.43816	0.932199	0.625511	2.66029e-122	7.37219e-118	DEK proto-oncogene [Source:ZFIN;Acc:ZDB-GENE-060512-191]	GO:0005634(nucleus);GO:0042393(histone binding);GO:2000779(regulation of double-strand break repair)	NA	K17046	NA
2	ENSDARG00000042469	ndufa12	1.43625	0.903542	0.668642	2.80432e-122	7.77132e-118	NADH:ubiquinone oxidoreductase subunit A12 [Source:ZFIN;Acc:ZDB-GENE-050828-1]	GO:0005739(mitochondrion);GO:0005743(mitochondrial inner membrane);GO:0005747(mitochondrial respiratory chain complex I);GO:0006979(response to oxidative stress);GO:0008137(NADH dehydrogenase (ubiquinone) activity);GO:0009055(electron transfer activity);GO:0016020(membrane);GO:0022900(electron transport chain);GO:0055114(oxidation-reduction process);GO:0070469(respirasome)	00190(Oxidative phosphorylation)	K11352	NA
2	ENSDARG00000058328	lsm7	2.09737	1.19226	0.81488	4.67586e-122	1.29577e-117	LSM7 homolog, U6 small nuclear RNA and mRNA degradation associated [Source:ZFIN;Acc:ZDB-GENE-030131-8284]	GO:0000398(mRNA splicing, via spliceosome);GO:0000956(nuclear-transcribed mRNA catabolic process);GO:0005688(U6 snRNP);GO:0005689(U12-type spliceosomal complex);GO:0071004(U2-type prespliceosome);GO:0071013(catalytic step 2 spliceosome);GO:1990726(Lsm1-7-Pat1 complex)	03018(RNA degradation);03040(Spliceosome)	K12626	NA
2	ENSDARG00000015315	psmc5	1.39996	0.916814	0.610682	7.06859e-122	1.95885e-117	proteasome 26S subunit, ATPase 5 [Source:ZFIN;Acc:ZDB-GENE-030131-6547]	GO:0000166(nucleotide binding);GO:0000502(proteasome complex);GO:0005524(ATP binding);GO:0005634(nucleus);GO:0005737(cytoplasm);GO:0008134(transcription factor binding);GO:0008540(proteasome regulatory particle, base subcomplex);GO:0016787(hydrolase activity);GO:0017025(TBP-class protein binding);GO:0030163(protein catabolic process);GO:0031531(thyrotropin-releasing hormone receptor binding);GO:0…	03050(Proteasome)	K03066	NA
2	ENSDARG00000037108	pfdn6	1.31046	0.870337	0.59043	8.00416e-122	2.21811e-117	prefoldin subunit 6 [Source:ZFIN;Acc:ZDB-GENE-040426-1589]	GO:0005737(cytoplasm);GO:0006457(protein folding);GO:0016272(prefoldin complex);GO:0051082(unfolded protein binding);GO:0051087(chaperone binding);GO:0051131(chaperone-mediated protein complex assembly)	NA	K04798	NA
2	ENSDARG00000045230	cox6b1	3.13961	1.61493	0.959114	9.1473e-122	2.5349e-117	cytochrome c oxidase subunit 6B1 [Source:ZFIN;Acc:ZDB-GENE-040718-448]	GO:0005515(protein binding);GO:0005739(mitochondrion)	00190(Oxidative phosphorylation);04260(Cardiac muscle contraction)	K02267	NA
2	ENSDARG00000057683	mcm6	1.81431	0.996929	0.863861	9.87218e-122	2.73578e-117	minichromosome maintenance complex component 6 [Source:ZFIN;Acc:ZDB-GENE-030909-6]	GO:0000166(nucleotide binding);GO:0003677(DNA binding);GO:0003678(DNA helicase activity);GO:0004386(helicase activity);GO:0005524(ATP binding);GO:0005634(nucleus);GO:0006260(DNA replication);GO:0006270(DNA replication initiation);GO:0016787(hydrolase activity);GO:0032508(DNA duplex unwinding);GO:0042555(MCM complex)	03030(DNA replication);04110(Cell cycle)	K02542	EC:3.6.4.12
2	ENSDARG00000015208	rbb4l	0.915901	0.661566	0.469307	2.15368e-121	5.96827e-117	retinoblastoma binding protein 4, like [Source:ZFIN;Acc:ZDB-GENE-030131-848]	GO:0005515(protein binding);GO:0005634(nucleus)	04218(Cellular senescence)	K10752	NA
2	ENSDARG00000045913	mrps10	1.16934	0.806641	0.535699	2.15598e-121	5.97464e-117	mitochondrial ribosomal protein S10 [Source:ZFIN;Acc:ZDB-GENE-040914-39]	GO:0003735(structural constituent of ribosome);GO:0005763(mitochondrial small ribosomal subunit);GO:0005840(ribosome);GO:0006412(translation)	03010(Ribosome)	K02946	NA
2	ENSDARG00000015111	ddx39ab	2.7777	1.54531	0.845998	2.23209e-121	6.18556e-117	DEAD (Asp-Glu-Ala-Asp) box polypeptide 39Ab [Source:ZFIN;Acc:ZDB-GENE-040426-2902]	GO:0003676(nucleic acid binding);GO:0005524(ATP binding)	NA	K13182	EC:3.6.4.13
2	ENSDARG00000075730	dnph1	0.931038	0.637216	0.547057	2.54082e-121	7.04113e-117	2'-deoxynucleoside 5'-phosphate N-hydrolase 1 [Source:ZFIN;Acc:ZDB-GENE-081107-5]	GO:0005634(nucleus);GO:0005737(cytoplasm);GO:0008152(metabolic process);GO:0009116(nucleoside metabolic process);GO:0009117(nucleotide metabolic process);GO:0009159(deoxyribonucleoside monophosphate catabolic process);GO:0016787(hydrolase activity);GO:0016798(hydrolase activity, acting on glycosyl bonds);GO:0016799(hydrolase activity, hydrolyzing N-glycosyl compounds);GO:0030307(positive regulati…	NA	K22928	EC:3.2.2.-
2	ENSDARG00000098785	glrx3	0.710744	0.536056	0.406946	3.39685e-121	9.41335e-117	glutaredoxin 3 [Source:ZFIN;Acc:ZDB-GENE-041010-22]	GO:0005623(cell);GO:0009055(electron transfer activity);GO:0015035(protein disulfide oxidoreductase activity);GO:0022900(electron transport chain);GO:0045454(cell redox homeostasis);GO:0055114(oxidation-reduction process)	NA	NA	NA
2	ENSDARG00000026489	khsrp	0.774091	0.595203	0.379121	3.43214e-121	9.51115e-117	KH-type splicing regulatory protein [Source:ZFIN;Acc:ZDB-GENE-030131-4357]	GO:0003676(nucleic acid binding);GO:0003723(RNA binding);GO:0006355(regulation of transcription, DNA-templated)	NA	K13210	NA
2	ENSDARG00000021973	st13	1.07142	0.758549	0.498207	3.682e-121	1.02036e-116	ST13, Hsp70 interacting protein [Source:ZFIN;Acc:ZDB-GENE-030131-5395]	GO:0005515(protein binding);GO:0046983(protein dimerization activity);GO:0051085(chaperone cofactor-dependent protein refolding)	NA	K09560	NA
2	ENSDARG00000052816	shmt1	0.93908	0.636913	0.560152	4.41026e-121	1.22217e-116	serine hydroxymethyltransferase 1 (soluble) [Source:ZFIN;Acc:ZDB-GENE-040426-1558]	GO:0000900(translation repressor activity, mRNA regulatory element binding);GO:0003824(catalytic activity);GO:0004372(glycine hydroxymethyltransferase activity);GO:0005634(nucleus);GO:0005737(cytoplasm);GO:0005829(cytosol);GO:0006544(glycine metabolic process);GO:0006565(L-serine catabolic process);GO:0006730(one-carbon metabolic process);GO:0008270(zinc ion binding);GO:0009113(purine nucleobase …	00260(Glycine, serine and threonine metabolism);00630(Glyoxylate and dicarboxylate metabolism);00670(One carbon pool by folate)	K00600	EC:2.1.2.1
2	ENSDARG00000039667	mrpl38	0.531878	0.439047	0.276721	5.28423e-121	1.46437e-116	mitochondrial ribosomal protein L38 [Source:ZFIN;Acc:ZDB-GENE-040426-2373]	GO:0005762(mitochondrial large ribosomal subunit)	NA	K17419	NA
2	ENSDARG00000078473	nucks1a	1.99912	1.23518	0.694645	6.84936e-121	1.89809e-116	nuclear casein kinase and cyclin-dependent kinase substrate 1a [Source:ZFIN;Acc:ZDB-GENE-040912-175]	GO:0005575(cellular_component);GO:0016301(kinase activity);GO:0016310(phosphorylation)	NA	NA	NA
2	ENSDARG00000013670	hyou1	3.56321	1.59656	1.15821	8.16865e-121	2.2637e-116	hypoxia up-regulated 1 [Source:ZFIN;Acc:ZDB-GENE-030131-5344]	GO:0000166(nucleotide binding);GO:0005524(ATP binding)	04141(Protein processing in endoplasmic reticulum)	K09486	NA
2	ENSDARG00000069977	myg1	1.15626	0.813429	0.507377	1.70487e-120	4.72452e-116	melanocyte proliferating gene 1 [Source:ZFIN;Acc:ZDB-GENE-060312-32]	GO:0003674(molecular_function);GO:0005575(cellular_component);GO:0005634(nucleus);GO:0008150(biological_process)	NA	NA	NA
2	ENSDARG00000012777	nucks1b	1.17031	0.823056	0.507834	1.91274e-120	5.30058e-116	nuclear casein kinase and cyclin-dependent kinase substrate 1b [Source:ZFIN;Acc:ZDB-GENE-030131-4544]	NA	NA	NA	NA
2	ENSDARG00000033175	snrpe	3.5487	1.8623	0.930207	2.85511e-120	7.91209e-116	small nuclear ribonucleoprotein polypeptide E [Source:ZFIN;Acc:ZDB-GENE-040426-1112]	GO:0000387(spliceosomal snRNP assembly);GO:0000398(mRNA splicing, via spliceosome);GO:0003723(RNA binding);GO:0005634(nucleus);GO:0005681(spliceosomal complex);GO:0005682(U5 snRNP);GO:0005685(U1 snRNP);GO:0005686(U2 snRNP);GO:0005687(U4 snRNP);GO:0005737(cytoplasm);GO:0005829(cytosol);GO:0006397(mRNA processing);GO:0008380(RNA splicing);GO:0034709(methylosome);GO:0034715(pICln-Sm protein complex)…	03040(Spliceosome)	K11097	NA
2	ENSDARG00000045155	phf5a	1.03199	0.694736	0.570895	3.94377e-120	1.0929e-115	PHD finger protein 5A [Source:ZFIN;Acc:ZDB-GENE-021219-3]	GO:0000398(mRNA splicing, via spliceosome);GO:0005686(U2 snRNP);GO:0005689(U12-type spliceosomal complex)	03040(Spliceosome)	K12834	NA
2	ENSDARG00000098355	atp5pd	5.33296	2.76114	0.949671	6.64799e-120	1.84229e-115	ATP synthase peripheral stalk subunit d [Source:ZFIN;Acc:ZDB-GENE-040426-1658]	GO:0000274(mitochondrial proton-transporting ATP synthase, stator stalk);GO:0000276(mitochondrial proton-transporting ATP synthase complex, coupling factor F(o));GO:0005739(mitochondrion);GO:0005743(mitochondrial inner membrane);GO:0006811(ion transport);GO:0015078(proton transmembrane transporter activity);GO:0015986(ATP synthesis coupled proton transport);GO:0016020(membrane);GO:0046933(proton-…	00190(Oxidative phosphorylation)	K02138	NA
2	ENSDARG00000057854	sap18	1.46667	0.932078	0.654021	8.12922e-120	2.25277e-115	Sin3A-associated protein [Source:ZFIN;Acc:ZDB-GENE-040426-1679]	NA	03013(RNA transport);03015(mRNA surveillance pathway)	K14324	NA
2	ENSDARG00000058560	adrm1	0.7268	0.54315	0.420208	9.52248e-120	2.63887e-115	adhesion regulating molecule 1 [Source:ZFIN;Acc:ZDB-GENE-040426-905]	GO:0000502(proteasome complex);GO:0005634(nucleus);GO:0005737(cytoplasm);GO:0006511(ubiquitin-dependent protein catabolic process);GO:0008541(proteasome regulatory particle, lid subcomplex);GO:0010950(positive regulation of endopeptidase activity);GO:0043130(ubiquitin binding);GO:0043248(proteasome assembly);GO:0061133(endopeptidase activator activity);GO:0070628(proteasome binding)	03050(Proteasome)	K06691	NA
2	ENSDARG00000016754	tbca	1.92215	1.1799	0.704061	1.23793e-119	3.43055e-115	tubulin cofactor a [Source:ZFIN;Acc:ZDB-GENE-040426-962]	GO:0005737(cytoplasm);GO:0005856(cytoskeleton);GO:0005874(microtubule);GO:0007021(tubulin complex assembly);GO:0007023(post-chaperonin tubulin folding pathway);GO:0048487(beta-tubulin binding)	NA	K17292	NA
2	ENSDARG00000014591	ilf2	2.32334	1.40482	0.725821	1.51767e-119	4.20578e-115	interleukin enhancer binding factor 2 [Source:ZFIN;Acc:ZDB-GENE-040426-2345]	GO:0003677(DNA binding);GO:0003723(RNA binding);GO:0003725(double-stranded RNA binding);GO:0005524(ATP binding);GO:0005634(nucleus);GO:0005730(nucleolus);GO:0006351(transcription, DNA-templated);GO:0006955(immune response);GO:0016740(transferase activity);GO:0045893(positive regulation of transcription, DNA-templated)	NA	K13089	NA
2	ENSDARG00000008097	srsf9	0.834957	0.664458	0.329525	1.77036e-119	4.90602e-115	serine and arginine rich splicing factor 9 [Source:ZFIN;Acc:ZDB-GENE-040426-2397]	GO:0000381(regulation of alternative mRNA splicing, via spliceosome);GO:0003676(nucleic acid binding);GO:0003723(RNA binding);GO:0005575(cellular_component);GO:0005634(nucleus);GO:0016607(nuclear speck);GO:0045292(mRNA cis splicing, via spliceosome)	03040(Spliceosome);05168(Herpes simplex virus 1 infection)	K21123	NA
2	ENSDARG00000058463	ndufab1a	1.299	0.830995	0.644487	3.02875e-119	8.39327e-115	NADH:ubiquinone oxidoreductase subunit AB1a [Source:ZFIN;Acc:ZDB-GENE-040801-1]	GO:0000035(acyl binding);GO:0000036(acyl carrier activity);GO:0005739(mitochondrion);GO:0005747(mitochondrial respiratory chain complex I);GO:0006633(fatty acid biosynthetic process)	00190(Oxidative phosphorylation)	K03955	NA
2	ENSDARG00000013966	psma6b	1.52234	0.972334	0.646766	3.2173e-119	8.91577e-115	proteasome subunit alpha 6b [Source:ZFIN;Acc:ZDB-GENE-040718-329]	GO:0000502(proteasome complex);GO:0004175(endopeptidase activity);GO:0004298(threonine-type endopeptidase activity);GO:0005634(nucleus);GO:0005737(cytoplasm);GO:0005839(proteasome core complex);GO:0006508(proteolysis);GO:0006511(ubiquitin-dependent protein catabolic process);GO:0008233(peptidase activity);GO:0010498(proteasomal protein catabolic process);GO:0010499(proteasomal ubiquitin-independe…	03050(Proteasome)	K02730	EC:3.4.25.1
2	ENSDARG00000069142	aars	0.865673	0.660246	0.390818	3.41959e-119	9.47637e-115	alanyl-tRNA synthetase [Source:ZFIN;Acc:ZDB-GENE-030131-3663]	GO:0000049(tRNA binding);GO:0000166(nucleotide binding);GO:0002161(aminoacyl-tRNA editing activity);GO:0002196(Ser-tRNA(Ala) hydrolase activity);GO:0003676(nucleic acid binding);GO:0003723(RNA binding);GO:0004812(aminoacyl-tRNA ligase activity);GO:0004813(alanine-tRNA ligase activity);GO:0005524(ATP binding);GO:0005737(cytoplasm);GO:0006400(tRNA modification);GO:0006412(translation);GO:0006419(al…	00970(Aminoacyl-tRNA biosynthesis)	K01872	EC:6.1.1.7
2	ENSDARG00000099667	snrpg	2.72167	1.48983	0.869346	4.6036e-119	1.27575e-114	small nuclear ribonucleoprotein polypeptide G [Source:ZFIN;Acc:ZDB-GENE-040912-105]	GO:0000387(spliceosomal snRNP assembly);GO:0000398(mRNA splicing, via spliceosome);GO:0003723(RNA binding);GO:0005634(nucleus);GO:0005681(spliceosomal complex);GO:0005682(U5 snRNP);GO:0005685(U1 snRNP);GO:0005686(U2 snRNP);GO:0005687(U4 snRNP);GO:0005689(U12-type spliceosomal complex);GO:0006397(mRNA processing);GO:0008380(RNA splicing);GO:0034719(SMN-Sm protein complex);GO:0043186(P granule);GO:…	03040(Spliceosome)	K11099	NA
2	ENSDARG00000015930	rwdd1	1.15539	0.791108	0.54644	6.88307e-119	1.90744e-114	RWD domain containing 1 [Source:ZFIN;Acc:ZDB-GENE-040718-270]	GO:0002181(cytoplasmic translation);GO:0005515(protein binding);GO:0005844(polysome)	NA	NA	NA
2	ENSDARG00000008936	sec11a	3.68002	1.72734	1.09116	1.1285e-118	3.12729e-114	SEC11 homolog A, signal peptidase complex subunit [Source:ZFIN;Acc:ZDB-GENE-040718-227]	GO:0005783(endoplasmic reticulum);GO:0005787(signal peptidase complex);GO:0005789(endoplasmic reticulum membrane);GO:0006465(signal peptide processing);GO:0006508(proteolysis);GO:0008233(peptidase activity);GO:0008236(serine-type peptidase activity);GO:0016020(membrane);GO:0016021(integral component of membrane);GO:0016787(hydrolase activity)	03060(Protein export)	K13280	EC:3.4.21.89
2	ENSDARG00000008237	sars	1.30579	0.889472	0.553903	1.21159e-118	3.35756e-114	seryl-tRNA synthetase [Source:ZFIN;Acc:ZDB-GENE-040831-1]	GO:0000122(negative regulation of transcription by RNA polymerase II);GO:0000166(nucleotide binding);GO:0000978(RNA polymerase II proximal promoter sequence-specific DNA binding);GO:0001525(angiogenesis);GO:0001569(branching involved in blood vessel morphogenesis);GO:0001944(vasculature development);GO:0003677(DNA binding);GO:0004812(aminoacyl-tRNA ligase activity);GO:0004828(serine-tRNA ligase a…	00970(Aminoacyl-tRNA biosynthesis)	K01875	EC:6.1.1.11
2	ENSDARG00000021753	ccdc25	0.995237	0.684148	0.540733	1.80801e-118	5.01036e-114	coiled-coil domain containing 25 [Source:ZFIN;Acc:ZDB-GENE-040426-1389]	GO:0003674(molecular_function);GO:0005575(cellular_component);GO:0008150(biological_process)	NA	NA	NA
2	ENSDARG00000004906	stip1	1.01967	0.760354	0.423363	2.83893e-118	7.86724e-114	stress-induced phosphoprotein 1 [Source:ZFIN;Acc:ZDB-GENE-041121-17]	GO:0005515(protein binding);GO:0008150(biological_process);GO:0051879(Hsp90 protein binding)	NA	K09553	NA
2	ENSDARG00000099572	hmgn2	68.2366	32.0848	1.08865	3.62725e-118	1.00518e-113	high mobility group nucleosomal binding domain 2 [Source:ZFIN;Acc:ZDB-GENE-051030-81]	GO:0000785(chromatin);GO:0005634(nucleus);GO:0008150(biological_process);GO:0031492(nucleosomal DNA binding)	NA	K11300	NA
2	ENSDARG00000015921	pwp1	0.912872	0.659251	0.469586	5.43857e-118	1.50714e-113	PWP1 homolog, endonuclein [Source:ZFIN;Acc:ZDB-GENE-040426-1049]	GO:0003674(molecular_function);GO:0005515(protein binding);GO:0005634(nucleus);GO:0008150(biological_process)	NA	K14791	NA
2	ENSDARG00000071670	tma7	4.11239	2.12067	0.955454	8.33575e-118	2.31e-113	translation machinery associated 7 homolog [Source:ZFIN;Acc:ZDB-GENE-061027-176]	GO:0002181(cytoplasmic translation);GO:0003674(molecular_function);GO:0005575(cellular_component);GO:0008150(biological_process)	NA	NA	NA
2	ENSDARG00000004527	pin4	0.723934	0.537525	0.429527	8.86378e-118	2.45633e-113	protein (peptidylprolyl cis/trans isomerase) NIMA-interacting, 4 (parvulin) [Source:ZFIN;Acc:ZDB-GENE-050522-117]	GO:0000413(protein peptidyl-prolyl isomerization);GO:0003677(DNA binding);GO:0003755(peptidyl-prolyl cis-trans isomerase activity);GO:0005634(nucleus);GO:0005730(nucleolus);GO:0005737(cytoplasm);GO:0005819(spindle);GO:0005856(cytoskeleton);GO:0016853(isomerase activity)	NA	K09579	EC:5.2.1.8
2	ENSDARG00000075325	mrpl16	0.716584	0.527262	0.442616	8.95527e-118	2.48168e-113	mitochondrial ribosomal protein L16 [Source:ZFIN;Acc:ZDB-GENE-041122-1]	GO:0003735(structural constituent of ribosome);GO:0005762(mitochondrial large ribosomal subunit);GO:0005840(ribosome);GO:0006412(translation);GO:0019843(rRNA binding);GO:0032543(mitochondrial translation)	03010(Ribosome)	K02878	NA
2	ENSDARG00000063145	tfam	0.855071	0.644351	0.408198	1.03831e-117	2.87738e-113	transcription factor A, mitochondrial [Source:ZFIN;Acc:ZDB-GENE-061013-552]	GO:0003677(DNA binding);GO:0005634(nucleus)	04371(Apelin signaling pathway)	K11830	NA
2	ENSDARG00000054980	ebna1bp2	1.49658	0.98287	0.606598	1.23228e-117	3.41489e-113	EBNA1 binding protein 2 [Source:ZFIN;Acc:ZDB-GENE-030131-6989]	GO:0003674(molecular_function);GO:0005730(nucleolus);GO:0006364(rRNA processing);GO:0030687(preribosome, large subunit precursor);GO:0034399(nuclear periphery);GO:0042273(ribosomal large subunit biogenesis)	NA	K14823	NA
2	ENSDARG00000038030	rbx1	2.76604	1.58459	0.803717	1.48993e-117	4.12889e-113	ring-box 1, E3 ubiquitin protein ligase [Source:ZFIN;Acc:ZDB-GENE-041008-106]	GO:0005634(nucleus);GO:0006511(ubiquitin-dependent protein catabolic process);GO:0008270(zinc ion binding);GO:0016567(protein ubiquitination);GO:0019788(NEDD8 transferase activity);GO:0031146(SCF-dependent proteasomal ubiquitin-dependent protein catabolic process);GO:0031461(cullin-RING ubiquitin ligase complex);GO:0031462(Cul2-RING ubiquitin ligase complex);GO:0031463(Cul3-RING ubiquitin ligase …	03420(Nucleotide excision repair);04110(Cell cycle);04114(Oocyte meiosis);04120(Ubiquitin mediated proteolysis);04141(Protein processing in endoplasmic reticulum);04310(Wnt signaling pathway);04350(TGF-beta signaling pathway)	K03868	EC:2.3.2.32
2	ENSDARG00000003693	hars	0.867784	0.62225	0.479842	1.72262e-117	4.77373e-113	histidyl-tRNA synthetase [Source:ZFIN;Acc:ZDB-GENE-040912-152]	GO:0002040(sprouting angiogenesis);GO:0004812(aminoacyl-tRNA ligase activity);GO:0004821(histidine-tRNA ligase activity);GO:0005524(ATP binding);GO:0005737(cytoplasm);GO:0005739(mitochondrion);GO:0005829(cytosol);GO:0006418(tRNA aminoacylation for protein translation);GO:0006427(histidyl-tRNA aminoacylation);GO:0032543(mitochondrial translation);GO:0042802(identical protein binding);GO:1901342(re…	00970(Aminoacyl-tRNA biosynthesis)	K01892	EC:6.1.1.21
2	ENSDARG00000018989	hspa4b	1.01864	0.72179	0.496995	2.23648e-117	6.19772e-113	heat shock protein 4b [Source:ZFIN;Acc:ZDB-GENE-030131-6018]	GO:0000166(nucleotide binding);GO:0005524(ATP binding);GO:0005634(nucleus);GO:0005829(cytosol)	04530(Tight junction)	K09489	NA
2	ENSDARG00000019507	mcm5	1.16274	0.72588	0.679723	2.35042e-117	6.51347e-113	minichromosome maintenance complex component 5 [Source:ZFIN;Acc:ZDB-GENE-021209-1]	GO:0000166(nucleotide binding);GO:0000278(mitotic cell cycle);GO:0003677(DNA binding);GO:0003688(DNA replication origin binding);GO:0004386(helicase activity);GO:0005524(ATP binding);GO:0005634(nucleus);GO:0006260(DNA replication);GO:0006270(DNA replication initiation);GO:0016787(hydrolase activity);GO:0042555(MCM complex);GO:0043009(chordate embryonic development);GO:0043066(negative regulation …	03030(DNA replication);04110(Cell cycle)	K02209	EC:3.6.4.12
2	ENSDARG00000060199	mrpl18	0.777457	0.553076	0.491284	2.68266e-117	7.4342e-113	mitochondrial ribosomal protein L18 [Source:ZFIN;Acc:ZDB-GENE-061013-632]	GO:0003735(structural constituent of ribosome);GO:0005622(intracellular);GO:0005739(mitochondrion);GO:0005840(ribosome);GO:0006412(translation);GO:0008097(5S rRNA binding)	03010(Ribosome)	K02881	NA
2	ENSDARG00000019530	hdgfl2	0.713532	0.545286	0.387964	4.59323e-117	1.27288e-112	HDGF like 2 [Source:ZFIN;Acc:ZDB-GENE-040426-2104]	NA	NA	NA	NA
2	ENSDARG00000029058	rbbp4	1.66729	1.022	0.706105	4.8237e-117	1.33674e-112	retinoblastoma binding protein 4 [Source:ZFIN;Acc:ZDB-GENE-030131-445]	GO:0005515(protein binding);GO:0005634(nucleus)	04218(Cellular senescence)	K10752	NA
2	ENSDARG00000007989	nedd8	0.854579	0.628155	0.444092	5.06896e-117	1.40471e-112	neural precursor cell expressed, developmentally down-regulated 8 [Source:ZFIN;Acc:ZDB-GENE-030616-588]	GO:0005515(protein binding)	NA	K12158	NA
2	ENSDARG00000018891	rnaseh2a	0.778583	0.55921	0.477462	5.64374e-117	1.56399e-112	ribonuclease H2, subunit A [Source:ZFIN;Acc:ZDB-GENE-040426-976]	GO:0003676(nucleic acid binding);GO:0003723(RNA binding);GO:0004518(nuclease activity);GO:0004519(endonuclease activity);GO:0004523(RNA-DNA hybrid ribonuclease activity);GO:0006298(mismatch repair);GO:0016070(RNA metabolic process);GO:0016787(hydrolase activity);GO:0032299(ribonuclease H2 complex);GO:0043137(DNA replication, removal of RNA primer);GO:0090305(nucleic acid phosphodiester bond hydro…	03030(DNA replication)	K10743	EC:3.1.26.4
2	ENSDARG00000063030	mesd	0.960875	0.653082	0.557084	5.83058e-117	1.61577e-112	mesoderm development LRP chaperone [Source:ZFIN;Acc:ZDB-GENE-070112-2142]	GO:0003674(molecular_function);GO:0005783(endoplasmic reticulum);GO:0006457(protein folding);GO:0016055(Wnt signaling pathway);GO:1904395(positive regulation of skeletal muscle acetylcholine-gated channel clustering)	NA	NA	NA
2	ENSDARG00000044575	vars	0.825333	0.591853	0.479737	6.43283e-117	1.78267e-112	valyl-tRNA synthetase [Source:ZFIN;Acc:ZDB-GENE-010601-1]	GO:0000166(nucleotide binding);GO:0002161(aminoacyl-tRNA editing activity);GO:0004812(aminoacyl-tRNA ligase activity);GO:0004832(valine-tRNA ligase activity);GO:0005524(ATP binding);GO:0005737(cytoplasm);GO:0005829(cytosol);GO:0006412(translation);GO:0006418(tRNA aminoacylation for protein translation);GO:0006438(valyl-tRNA aminoacylation);GO:0016874(ligase activity);GO:0106074(aminoacyl-tRNA met…	00970(Aminoacyl-tRNA biosynthesis)	K01873	EC:6.1.1.9
2	ENSDARG00000041314	ndufb9	2.13695	1.36922	0.642195	9.48966e-117	2.62977e-112	NADH:ubiquinone oxidoreductase subunit B9 [Source:ZFIN;Acc:ZDB-GENE-030131-8364]	GO:0005747(mitochondrial respiratory chain complex I);GO:0006120(mitochondrial electron transport, NADH to ubiquinone)	00190(Oxidative phosphorylation)	K03965	NA
2	ENSDARG00000013075	mrpl11	1.24968	0.824893	0.599286	1.15268e-116	3.1943e-112	mitochondrial ribosomal protein L11 [Source:ZFIN;Acc:ZDB-GENE-040718-294]	GO:0000027(ribosomal large subunit assembly);GO:0003735(structural constituent of ribosome);GO:0005762(mitochondrial large ribosomal subunit);GO:0005840(ribosome);GO:0006412(translation);GO:0015934(large ribosomal subunit);GO:0019843(rRNA binding);GO:0070180(large ribosomal subunit rRNA binding)	03010(Ribosome)	K02867	NA
2	ENSDARG00000057691	srsf1a	2.05365	1.30488	0.654273	1.41208e-116	3.91317e-112	serine and arginine rich splicing factor 1a [Source:ZFIN;Acc:ZDB-GENE-040426-1950]	GO:0000381(regulation of alternative mRNA splicing, via spliceosome);GO:0003676(nucleic acid binding);GO:0003723(RNA binding);GO:0005634(nucleus);GO:0006397(mRNA processing);GO:0008380(RNA splicing);GO:0016607(nuclear speck);GO:0045292(mRNA cis splicing, via spliceosome)	03040(Spliceosome);05168(Herpes simplex virus 1 infection)	K12890	NA
2	ENSDARG00000100116	mrps24	0.938363	0.644423	0.542137	3.38181e-116	9.37167e-112	mitochondrial ribosomal protein S24 [Source:ZFIN;Acc:ZDB-GENE-050522-393]	GO:0003735(structural constituent of ribosome);GO:0005739(mitochondrion);GO:0005763(mitochondrial small ribosomal subunit);GO:0005840(ribosome);GO:0032543(mitochondrial translation)	NA	K17403	NA
2	ENSDARG00000017084	bud31	1.73872	1.15647	0.588298	7.53799e-116	2.08893e-111	BUD31 homolog (S. cerevisiae) [Source:ZFIN;Acc:ZDB-GENE-040720-3]	GO:0005634(nucleus)	03040(Spliceosome)	K12873	NA
2	ENSDARG00000116743	rnps1	0.959027	0.694183	0.466256	8.0193e-116	2.22231e-111	RNA binding protein S1, serine-rich domain [Source:ZFIN;Acc:ZDB-GENE-030131-5228]	GO:0000381(regulation of alternative mRNA splicing, via spliceosome);GO:0000398(mRNA splicing, via spliceosome);GO:0003676(nucleic acid binding);GO:0003723(RNA binding);GO:0005654(nucleoplasm);GO:0005737(cytoplasm);GO:0008380(RNA splicing);GO:0061574(ASAP complex)	03013(RNA transport);03015(mRNA surveillance pathway)	K14325	NA
2	ENSDARG00000035282	emc6	0.52735	0.428521	0.299393	1.07565e-115	2.98084e-111	ER membrane protein complex subunit 6 [Source:ZFIN;Acc:ZDB-GENE-030131-9164]	GO:0000045(autophagosome assembly);GO:0003674(molecular_function);GO:0005783(endoplasmic reticulum);GO:0016020(membrane);GO:0016021(integral component of membrane);GO:0034975(protein folding in endoplasmic reticulum);GO:0072546(ER membrane protein complex)	NA	NA	NA
2	ENSDARG00000062916	mrpl37	0.421032	0.341315	0.302824	1.25502e-115	3.47791e-111	mitochondrial ribosomal protein L37 [Source:ZFIN;Acc:ZDB-GENE-050309-20]	GO:0003735(structural constituent of ribosome);GO:0005739(mitochondrion);GO:0005840(ribosome);GO:0006412(translation)	NA	K17418	NA
2	ENSDARG00000038881	acaa2	0.533461	0.423402	0.333355	1.41772e-115	3.92879e-111	acetyl-CoA acyltransferase 2 [Source:ZFIN;Acc:ZDB-GENE-040426-1996]	GO:0003824(catalytic activity);GO:0003985(acetyl-CoA C-acetyltransferase activity);GO:0003988(acetyl-CoA C-acyltransferase activity);GO:0005739(mitochondrion);GO:0006635(fatty acid beta-oxidation);GO:0016740(transferase activity);GO:0016746(transferase activity, transferring acyl groups);GO:0016747(transferase activity, transferring acyl groups other than amino-acyl groups)	00062(Fatty acid elongation);00071(Fatty acid degradation);00280(Valine, leucine and isoleucine degradation)	K07508	EC:2.3.1.16
2	ENSDARG00000071679	mydgf	0.712902	0.514302	0.471089	1.51363e-115	4.19457e-111	myeloid-derived growth factor [Source:ZFIN;Acc:ZDB-GENE-040718-183]	GO:0003674(molecular_function);GO:0008150(biological_process)	NA	NA	NA
2	ENSDARG00000037188	rpa2	2.09963	1.26176	0.734699	1.95055e-115	5.40537e-111	replication protein A2 [Source:ZFIN;Acc:ZDB-GENE-010131-3]	GO:0000722(telomere maintenance via recombination);GO:0000724(double-strand break repair via homologous recombination);GO:0000781(chromosome, telomeric region);GO:0000785(chromatin);GO:0000794(condensed nuclear chromosome);GO:0003677(DNA binding);GO:0003684(damaged DNA binding);GO:0003690(double-stranded DNA binding);GO:0003697(single-stranded DNA binding);GO:0005515(protein binding);GO:0005634(n…	03030(DNA replication);03420(Nucleotide excision repair);03430(Mismatch repair);03440(Homologous recombination);03460(Fanconi anemia pathway)	K10739	NA
2	ENSDARG00000039346	ndufa5	1.17571	0.835268	0.493223	2.48195e-115	6.87797e-111	NADH:ubiquinone oxidoreductase subunit A5 [Source:ZFIN;Acc:ZDB-GENE-050320-17]	GO:0005747(mitochondrial respiratory chain complex I);GO:0022904(respiratory electron transport chain)	00190(Oxidative phosphorylation)	K03949	NA
2	ENSDARG00000102417	psmd7	1.93002	1.17811	0.712142	2.69142e-115	7.45848e-111	proteasome 26S subunit, non-ATPase 7 [Source:ZFIN;Acc:ZDB-GENE-030131-5541]	GO:0000502(proteasome complex);GO:0005515(protein binding);GO:0005838(proteasome regulatory particle);GO:0021551(central nervous system morphogenesis);GO:0043161(proteasome-mediated ubiquitin-dependent protein catabolic process);GO:1904888(cranial skeletal system development)	03050(Proteasome)	K03038	NA
2	ENSDARG00000006408	hmgb3b	0.906888	0.622832	0.542083	3.47004e-115	9.61616e-111	high mobility group box 3b [Source:ZFIN;Acc:ZDB-GENE-050417-290]	GO:0000790(nuclear chromatin);GO:0003677(DNA binding);GO:0005634(nucleus);GO:0005737(cytoplasm);GO:0006310(DNA recombination);GO:0006338(chromatin remodeling);GO:0006357(regulation of transcription by RNA polymerase II);GO:0008134(transcription factor binding);GO:0008301(DNA binding, bending);GO:0045089(positive regulation of innate immune response);GO:0045944(positive regulation of transcription…	NA	K11296	NA
2	ENSDARG00000030537	psmc1a	0.876196	0.610389	0.521525	6.0011e-115	1.66303e-110	proteasome 26S subunit, ATPase 1a [Source:ZFIN;Acc:ZDB-GENE-030131-8730]	GO:0000166(nucleotide binding);GO:0000502(proteasome complex);GO:0005524(ATP binding);GO:0005737(cytoplasm);GO:0008540(proteasome regulatory particle, base subcomplex);GO:0016787(hydrolase activity);GO:0017025(TBP-class protein binding);GO:0030163(protein catabolic process);GO:0036402(proteasome-activating ATPase activity);GO:1901800(positive regulation of proteasomal protein catabolic process)	03050(Proteasome)	K03062	NA
2	ENSDARG00000089681	btf3l4	1.03112	0.788512	0.387005	6.20161e-115	1.71859e-110	basic transcription factor 3-like 4 [Source:ZFIN;Acc:ZDB-GENE-040426-1650]	GO:0003674(molecular_function);GO:0005575(cellular_component);GO:0008150(biological_process)	NA	NA	NA
2	ENSDARG00000086411	srsf10b	0.685253	0.532194	0.364684	8.4878e-115	2.35214e-110	serine and arginine rich splicing factor 10b [Source:ZFIN;Acc:ZDB-GENE-040426-1415]	GO:0000381(regulation of alternative mRNA splicing, via spliceosome);GO:0000395(mRNA 5'-splice site recognition);GO:0003676(nucleic acid binding);GO:0003723(RNA binding);GO:0005575(cellular_component);GO:0005634(nucleus);GO:0016607(nuclear speck);GO:0043484(regulation of RNA splicing);GO:0045292(mRNA cis splicing, via spliceosome)	03040(Spliceosome)	K12900	NA
2	ENSDARG00000003189	psmd1	1.72525	1.07704	0.67974	8.7186e-115	2.4161e-110	proteasome 26S subunit, non-ATPase 1 [Source:ZFIN;Acc:ZDB-GENE-040426-810]	GO:0000502(proteasome complex);GO:0004175(endopeptidase activity);GO:0005634(nucleus);GO:0008540(proteasome regulatory particle, base subcomplex);GO:0016020(membrane);GO:0016021(integral component of membrane);GO:0022624(proteasome accessory complex);GO:0030234(enzyme regulator activity);GO:0034515(proteasome storage granule);GO:0042176(regulation of protein catabolic process);GO:0043161(proteaso…	03050(Proteasome)	K03032	NA
2	ENSDARG00000093448	mpc1	1.0768	0.814499	0.40276	8.97758e-115	2.48787e-110	mitochondrial pyruvate carrier 1 [Source:ZFIN;Acc:ZDB-GENE-040718-94]	GO:0005739(mitochondrion);GO:0005743(mitochondrial inner membrane);GO:0006850(mitochondrial pyruvate transmembrane transport);GO:0016020(membrane);GO:0016021(integral component of membrane);GO:0031305(integral component of mitochondrial inner membrane);GO:0048565(digestive tract development);GO:0050833(pyruvate transmembrane transporter activity)	NA	K22138	NA
2	ENSDARG00000070046	eny2	0.883728	0.614864	0.523335	9.28898e-115	2.57416e-110	enhancer of yellow 2 homolog (Drosophila) [Source:ZFIN;Acc:ZDB-GENE-040718-124]	GO:0000124(SAGA complex);GO:0003682(chromatin binding);GO:0003713(transcription coactivator activity);GO:0005634(nucleus);GO:0005643(nuclear pore);GO:0005654(nucleoplasm);GO:0006325(chromatin organization);GO:0006357(regulation of transcription by RNA polymerase II);GO:0006368(transcription elongation from RNA polymerase II promoter);GO:0006406(mRNA export from nucleus);GO:0015031(protein transpo…	NA	K11368	NA
2	ENSDARG00000068305	mrps14	0.73759	0.557926	0.402746	9.95103e-115	2.75763e-110	mitochondrial ribosomal protein S14 [Source:ZFIN;Acc:ZDB-GENE-060825-75]	GO:0003735(structural constituent of ribosome);GO:0005622(intracellular);GO:0005763(mitochondrial small ribosomal subunit);GO:0005840(ribosome);GO:0006412(translation)	03010(Ribosome)	K02954	NA
2	ENSDARG00000101707	si:ch211-156b7.4	0.851225	0.577583	0.559513	1.41812e-114	3.92988e-110	si:ch211-156b7.4 [Source:ZFIN;Acc:ZDB-GENE-141212-376]	NA	NA	NA	NA
2	ENSDARG00000060036	aimp1a	1.25235	0.851508	0.55655	1.47136e-114	4.07744e-110	aminoacyl tRNA synthetase complex-interacting multifunctional protein 1 [Source:ZFIN;Acc:ZDB-GENE-060825-144]	GO:0000049(tRNA binding);GO:0003723(RNA binding);GO:0006418(tRNA aminoacylation for protein translation);GO:0017101(aminoacyl-tRNA synthetase multienzyme complex);GO:0017102(methionyl glutamyl tRNA synthetase complex)	NA	K15437	NA
2	ENSDARG00000059323	rpn1	1.12492	0.763992	0.558194	2.00602e-114	5.55909e-110	ribophorin I [Source:ZFIN;Acc:ZDB-GENE-030131-4286]	GO:0004579(dolichyl-diphosphooligosaccharide-protein glycotransferase activity);GO:0005783(endoplasmic reticulum);GO:0005789(endoplasmic reticulum membrane);GO:0006486(protein glycosylation);GO:0016020(membrane);GO:0016021(integral component of membrane);GO:0018279(protein N-linked glycosylation via asparagine)	00510(N-Glycan biosynthesis);04141(Protein processing in endoplasmic reticulum)	K12666	NA
2	ENSDARG00000113969	supt4h1	0.707169	0.543223	0.380512	2.24244e-114	6.21425e-110	SPT4 homolog, DSIF elongation factor subunit [Source:ZFIN;Acc:ZDB-GENE-040718-214]	GO:0000993(RNA polymerase II complex binding);GO:0003727(single-stranded RNA binding);GO:0005634(nucleus);GO:0006325(chromatin organization);GO:0006355(regulation of transcription, DNA-templated);GO:0008270(zinc ion binding);GO:0032044(DSIF complex);GO:0032786(positive regulation of DNA-templated transcription, elongation);GO:0046872(metal ion binding)	NA	K15171	NA
2	ENSDARG00000102333	fcf1	0.569287	0.474955	0.261365	2.70574e-114	7.49814e-110	FCF1 rRNA-processing protein [Source:ZFIN;Acc:ZDB-GENE-050417-67]	GO:0003674(molecular_function);GO:0032040(small-subunit processome)	03008(Ribosome biogenesis in eukaryotes)	K14566	NA
2	ENSDARG00000010965	psma8	4.2993	2.2536	0.931869	3.41982e-114	9.47701e-110	proteasome subunit alpha 8 [Source:ZFIN;Acc:ZDB-GENE-040426-2194]	GO:0000502(proteasome complex);GO:0004175(endopeptidase activity);GO:0004298(threonine-type endopeptidase activity);GO:0005634(nucleus);GO:0005737(cytoplasm);GO:0005839(proteasome core complex);GO:0006508(proteolysis);GO:0006511(ubiquitin-dependent protein catabolic process);GO:0008233(peptidase activity);GO:0010498(proteasomal protein catabolic process);GO:0010499(proteasomal ubiquitin-independe…	03050(Proteasome)	K02731	EC:3.4.25.1
2	ENSDARG00000061100	nars	2.17232	1.29569	0.745519	3.90708e-114	1.08273e-109	asparaginyl-tRNA synthetase [Source:ZFIN;Acc:ZDB-GENE-030131-1016]	GO:0000166(nucleotide binding);GO:0003676(nucleic acid binding);GO:0004812(aminoacyl-tRNA ligase activity);GO:0004816(asparagine-tRNA ligase activity);GO:0005524(ATP binding);GO:0006418(tRNA aminoacylation for protein translation);GO:0006421(asparaginyl-tRNA aminoacylation)	00970(Aminoacyl-tRNA biosynthesis)	K01893	EC:6.1.1.22
2	ENSDARG00000007526	ndufs2	0.983787	0.687909	0.516128	4.03439e-114	1.11801e-109	NADH:ubiquinone oxidoreductase core subunit S2 [Source:ZFIN;Acc:ZDB-GENE-050522-273]	GO:0016651(oxidoreductase activity, acting on NAD(P)H);GO:0048038(quinone binding);GO:0051287(NAD binding);GO:0055114(oxidation-reduction process)	00190(Oxidative phosphorylation)	K03935	1.6.99.3;EC:7.1.1.2
2	ENSDARG00000052840	ndufs4	1.07175	0.744397	0.525825	4.86893e-114	1.34928e-109	NADH:ubiquinone oxidoreductase subunit S4 [Source:ZFIN;Acc:ZDB-GENE-050522-421]	GO:0005747(mitochondrial respiratory chain complex I);GO:0008137(NADH dehydrogenase (ubiquinone) activity);GO:0016651(oxidoreductase activity, acting on NAD(P)H);GO:0022900(electron transport chain)	00190(Oxidative phosphorylation)	K03937	NA
2	ENSDARG00000018562	cope	1.17352	0.828767	0.501804	6.19543e-114	1.71688e-109	coatomer protein complex, subunit epsilon [Source:ZFIN;Acc:ZDB-GENE-041114-59]	GO:0000139(Golgi membrane);GO:0005198(structural molecule activity);GO:0005515(protein binding);GO:0005737(cytoplasm);GO:0005794(Golgi apparatus);GO:0006888(endoplasmic reticulum to Golgi vesicle-mediated transport);GO:0006890(retrograde vesicle-mediated transport, Golgi to endoplasmic reticulum);GO:0006891(intra-Golgi vesicle-mediated transport);GO:0015031(protein transport);GO:0016020(membrane)…	NA	K17268	NA
2	ENSDARG00000011648	snrpd1	4.03589	2.1227	0.926986	6.57846e-114	1.82302e-109	small nuclear ribonucleoprotein D1 polypeptide [Source:ZFIN;Acc:ZDB-GENE-020419-14]	GO:0000243(commitment complex);GO:0000387(spliceosomal snRNP assembly);GO:0003723(RNA binding);GO:0005634(nucleus);GO:0005682(U5 snRNP);GO:0005685(U1 snRNP);GO:0005686(U2 snRNP);GO:0005687(U4 snRNP);GO:0005689(U12-type spliceosomal complex);GO:0006396(RNA processing);GO:0006397(mRNA processing);GO:0007507(heart development);GO:0008380(RNA splicing);GO:0034715(pICln-Sm protein complex);GO:0034719(…	03040(Spliceosome)	K11087	NA
2	ENSDARG00000104901	ostc	2.0913	1.14635	0.867348	9.08981e-114	2.51897e-109	oligosaccharyltransferase complex subunit [Source:ZFIN;Acc:ZDB-GENE-040426-1079]	GO:0016020(membrane);GO:0016021(integral component of membrane)	NA	NA	NA
2	ENSDARG00000101161	orc4	0.637222	0.482948	0.399927	1.01461e-113	2.81169e-109	origin recognition complex, subunit 4 [Source:ZFIN;Acc:ZDB-GENE-040426-2224]	GO:0000808(origin recognition complex);GO:0003677(DNA binding);GO:0003688(DNA replication origin binding);GO:0005634(nucleus);GO:0005664(nuclear origin of replication recognition complex);GO:0006260(DNA replication);GO:0006270(DNA replication initiation)	04110(Cell cycle)	K02606	NA
2	ENSDARG00000103594	npm3	1.64292	1.0218	0.685143	1.22947e-113	3.4071e-109	nucleophosmin/nucleoplasmin, 3 [Source:ZFIN;Acc:ZDB-GENE-050320-50]	GO:0015630(microtubule cytoskeleton);GO:0060271(cilium assembly)	NA	K11278	NA
2	ENSDARG00000024204	mcm3	1.27197	0.776322	0.712337	1.29071e-113	3.5768e-109	minichromosome maintenance complex component 3 [Source:ZFIN;Acc:ZDB-GENE-020419-4]	GO:0000166(nucleotide binding);GO:0003677(DNA binding);GO:0003682(chromatin binding);GO:0004386(helicase activity);GO:0005524(ATP binding);GO:0005634(nucleus);GO:0006260(DNA replication);GO:0006270(DNA replication initiation);GO:0016787(hydrolase activity);GO:0042555(MCM complex);GO:0060041(retina development in camera-type eye)	03030(DNA replication);04110(Cell cycle)	K02541	EC:3.6.4.12
2	ENSDARG00000052721	prim2	0.680477	0.517862	0.39398	1.3813e-113	3.82787e-109	DNA primase subunit 2 [Source:ZFIN;Acc:ZDB-GENE-050522-471]	GO:0003677(DNA binding);GO:0003697(single-stranded DNA binding);GO:0003896(DNA primase activity);GO:0003899(DNA-directed 5'-3' RNA polymerase activity);GO:0005658(alpha DNA polymerase:primase complex);GO:0006260(DNA replication);GO:0006269(DNA replication, synthesis of RNA primer);GO:0016740(transferase activity);GO:0016779(nucleotidyltransferase activity);GO:0046872(metal ion binding);GO:0051536…	03030(DNA replication)	K02685	NA
2	ENSDARG00000043561	psmc1b	0.646259	0.49703	0.378781	2.09234e-113	5.79828e-109	proteasome 26S subunit, ATPase 1b [Source:ZFIN;Acc:ZDB-GENE-040625-69]	GO:0000166(nucleotide binding);GO:0000502(proteasome complex);GO:0005524(ATP binding);GO:0005737(cytoplasm);GO:0008540(proteasome regulatory particle, base subcomplex);GO:0016787(hydrolase activity);GO:0017025(TBP-class protein binding);GO:0030163(protein catabolic process);GO:0036402(proteasome-activating ATPase activity);GO:1901800(positive regulation of proteasomal protein catabolic process)	03050(Proteasome)	K03062	NA
2	ENSDARG00000024651	snrpa1	0.973716	0.695769	0.484893	2.71643e-113	7.52777e-109	small nuclear ribonucleoprotein polypeptide A' [Source:ZFIN;Acc:ZDB-GENE-041114-82]	GO:0000398(mRNA splicing, via spliceosome);GO:0005515(protein binding);GO:0005686(U2 snRNP);GO:0030620(U2 snRNA binding)	03040(Spliceosome)	K11092	NA
2	ENSDARG00000058454	dynll1	2.35892	1.34578	0.809685	3.59659e-113	9.96687e-109	dynein, light chain, LC8-type 1 [Source:ZFIN;Acc:ZDB-GENE-040426-1961]	GO:0003774(motor activity);GO:0005737(cytoplasm);GO:0005856(cytoskeleton);GO:0005868(cytoplasmic dynein complex);GO:0005874(microtubule);GO:0005875(microtubule associated complex);GO:0007017(microtubule-based process);GO:0008574(ATP-dependent microtubule motor activity, plus-end-directed);GO:0030286(dynein complex);GO:0045505(dynein intermediate chain binding);GO:0051959(dynein light intermediate…	NA	K10418	NA
2	ENSDARG00000006092	rad21a	1.49258	1.15536	0.369469	4.34237e-113	1.20336e-108	RAD21 cohesin complex component a [Source:ZFIN;Acc:ZDB-GENE-030131-994]	GO:0000775(chromosome, centromeric region);GO:0000922(spindle pole);GO:0001947(heart looping);GO:0003181(atrioventricular valve morphogenesis);GO:0003187(ventriculo bulbo valve morphogenesis);GO:0003682(chromatin binding);GO:0005515(protein binding);GO:0005634(nucleus);GO:0005694(chromosome);GO:0005737(cytoplasm);GO:0005829(cytosol);GO:0005856(cytoskeleton);GO:0006281(DNA repair);GO:0006302(doubl…	04110(Cell cycle)	K06670	NA
2	ENSDARG00000027749	hirip3	0.952168	0.67651	0.493105	4.51838e-113	1.25213e-108	HIRA interacting protein 3 [Source:ZFIN;Acc:ZDB-GENE-030131-5753]	GO:0003674(molecular_function);GO:0007420(brain development)	NA	NA	NA
2	ENSDARG00000038743	copb2	0.95912	0.729243	0.395312	6.70642e-113	1.85848e-108	coatomer protein complex, subunit beta 2 [Source:ZFIN;Acc:ZDB-GENE-010724-7]	GO:0000139(Golgi membrane);GO:0005198(structural molecule activity);GO:0005515(protein binding);GO:0005737(cytoplasm);GO:0005794(Golgi apparatus);GO:0006886(intracellular protein transport);GO:0006888(endoplasmic reticulum to Golgi vesicle-mediated transport);GO:0006890(retrograde vesicle-mediated transport, Golgi to endoplasmic reticulum);GO:0006891(intra-Golgi vesicle-mediated transport);GO:001…	NA	K17302	NA
2	ENSDARG00000042644	sod2	1.18733	0.837222	0.50404	7.19576e-113	1.99409e-108	superoxide dismutase 2, mitochondrial [Source:ZFIN;Acc:ZDB-GENE-030131-7742]	GO:0001780(neutrophil homeostasis);GO:0004784(superoxide dismutase activity);GO:0005739(mitochondrion);GO:0006801(superoxide metabolic process);GO:0016491(oxidoreductase activity);GO:0019430(removal of superoxide radicals);GO:0030145(manganese ion binding);GO:0045087(innate immune response);GO:0046686(response to cadmium ion);GO:0046872(metal ion binding);GO:0051597(response to methylmercury);GO:…	04068(FoxO signaling pathway);04146(Peroxisome)	K04564	EC:1.15.1.1
2	ENSDARG00000044540	fkbp2	1.13774	0.735189	0.629989	1.04299e-112	2.89033e-108	FKBP prolyl isomerase 2 [Source:ZFIN;Acc:ZDB-GENE-040912-126]	GO:0000413(protein peptidyl-prolyl isomerization);GO:0003755(peptidyl-prolyl cis-trans isomerase activity);GO:0016853(isomerase activity)	NA	K09569	EC:5.2.1.8
2	ENSDARG00000002240	psmb6	3.28718	1.81611	0.855996	1.0627e-112	2.94494e-108	proteasome subunit beta 6 [Source:ZFIN;Acc:ZDB-GENE-990415-216]	GO:0000502(proteasome complex);GO:0004175(endopeptidase activity);GO:0004298(threonine-type endopeptidase activity);GO:0005634(nucleus);GO:0005737(cytoplasm);GO:0005839(proteasome core complex);GO:0006508(proteolysis);GO:0008233(peptidase activity);GO:0010498(proteasomal protein catabolic process);GO:0010499(proteasomal ubiquitin-independent protein catabolic process);GO:0016787(hydrolase activit…	03050(Proteasome)	K02738	EC:3.4.25.1
2	ENSDARG00000021550	rad23b	0.843337	0.684765	0.300501	1.16821e-112	3.23734e-108	RAD23 homolog B, nucleotide excision repair protein [Source:ZFIN;Acc:ZDB-GENE-040426-1487]	GO:0000502(proteasome complex);GO:0003684(damaged DNA binding);GO:0005515(protein binding);GO:0005634(nucleus);GO:0005654(nucleoplasm);GO:0005829(cytosol);GO:0006289(nucleotide-excision repair);GO:0031593(polyubiquitin modification-dependent protein binding);GO:0043130(ubiquitin binding);GO:0043161(proteasome-mediated ubiquitin-dependent protein catabolic process);GO:0070628(proteasome binding)	03420(Nucleotide excision repair);04141(Protein processing in endoplasmic reticulum)	K10839	NA
2	ENSDARG00000025972	mcts1	1.12372	0.750205	0.582922	1.28692e-112	3.56632e-108	malignant T cell amplified sequence 1 [Source:ZFIN;Acc:ZDB-GENE-040426-957]	GO:0003723(RNA binding);GO:0005737(cytoplasm)	NA	K07575	NA
2	ENSDARG00000009250	etfb	0.781002	0.604516	0.369547	1.90807e-112	5.28765e-108	electron transfer flavoprotein subunit beta [Source:ZFIN;Acc:ZDB-GENE-040426-1931]	GO:0005829(cytosol);GO:0009055(electron transfer activity);GO:0022900(electron transport chain)	NA	K03521	NA
2	ENSDARG00000015385	ndufs3	0.914629	0.658365	0.474299	2.61299e-112	7.24111e-108	NADH:ubiquinone oxidoreductase core subunit S3 [Source:ZFIN;Acc:ZDB-GENE-050417-274]	GO:0005747(mitochondrial respiratory chain complex I);GO:0008137(NADH dehydrogenase (ubiquinone) activity);GO:0016651(oxidoreductase activity, acting on NAD(P)H);GO:0055114(oxidation-reduction process)	00190(Oxidative phosphorylation)	K03936	1.6.99.3;EC:7.1.1.2
2	ENSDARG00000034916	hat1	0.69028	0.519521	0.409999	2.93754e-112	8.1405e-108	histone acetyltransferase 1 [Source:ZFIN;Acc:ZDB-GENE-040912-99]	GO:0000781(chromosome, telomeric region);GO:0000790(nuclear chromatin);GO:0004402(histone acetyltransferase activity);GO:0005634(nucleus);GO:0006325(chromatin organization);GO:0006348(chromatin silencing at telomere);GO:0010485(H4 histone acetyltransferase activity);GO:0016573(histone acetylation);GO:0016740(transferase activity);GO:0016746(transferase activity, transferring acyl groups);GO:00423…	NA	K11303	EC:2.3.1.48
2	ENSDARG00000043631	bcas2	0.883919	0.665724	0.40899	5.78471e-112	1.60306e-107	BCAS2, pre-mRNA processing factor [Source:ZFIN;Acc:ZDB-GENE-030408-5]	GO:0000974(Prp19 complex);GO:0003674(molecular_function);GO:0005634(nucleus);GO:0005681(spliceosomal complex);GO:0005730(nucleolus);GO:0006397(mRNA processing);GO:0008380(RNA splicing)	03040(Spliceosome)	K12861	NA
2	ENSDARG00000039208	nasp	1.94511	1.17489	0.727332	6.54336e-112	1.81329e-107	nuclear autoantigenic sperm protein (histone-binding) [Source:ZFIN;Acc:ZDB-GENE-030131-5511]	GO:0005515(protein binding);GO:0005575(cellular_component);GO:0005634(nucleus);GO:0005654(nucleoplasm);GO:0006335(DNA replication-dependent nucleosome assembly);GO:0008150(biological_process);GO:0034080(CENP-A containing nucleosome assembly);GO:0042393(histone binding)	NA	K11291	NA
2	ENSDARG00000043865	timm9	0.566598	0.434093	0.384322	7.52164e-112	2.0844e-107	translocase of inner mitochondrial membrane 9 homolog [Source:ZFIN;Acc:ZDB-GENE-021206-14]	GO:0005739(mitochondrion);GO:0015031(protein transport);GO:0046872(metal ion binding)	NA	K17777	NA
2	ENSDARG00000059304	chchd2	1.01766	0.742069	0.455636	1.03115e-111	2.85753e-107	coiled-coil-helix-coiled-coil-helix domain containing 2 [Source:ZFIN;Acc:ZDB-GENE-040426-1737]	GO:0005634(nucleus);GO:0005739(mitochondrion);GO:0007005(mitochondrion organization)	NA	K22758	NA
2	ENSDARG00000101295	psmd4a	0.836888	0.595972	0.489791	1.39172e-111	3.85674e-107	proteasome 26S subunit, non-ATPase 4a [Source:ZFIN;Acc:ZDB-GENE-040625-104]	GO:0005634(nucleus);GO:0005829(cytosol);GO:0006511(ubiquitin-dependent protein catabolic process);GO:0008540(proteasome regulatory particle, base subcomplex);GO:0031593(polyubiquitin modification-dependent protein binding);GO:0043161(proteasome-mediated ubiquitin-dependent protein catabolic process);GO:0043248(proteasome assembly)	03050(Proteasome)	K03029	NA
2	ENSDARG00000004173	copa	0.755826	0.589435	0.35872	1.41438e-111	3.91952e-107	coatomer protein complex, subunit alpha [Source:ZFIN;Acc:ZDB-GENE-020905-2]	GO:0000139(Golgi membrane);GO:0005198(structural molecule activity);GO:0005515(protein binding);GO:0005737(cytoplasm);GO:0005794(Golgi apparatus);GO:0006886(intracellular protein transport);GO:0006888(endoplasmic reticulum to Golgi vesicle-mediated transport);GO:0006890(retrograde vesicle-mediated transport, Golgi to endoplasmic reticulum);GO:0006891(intra-Golgi vesicle-mediated transport);GO:001…	NA	K05236	NA
2	ENSDARG00000071878	trmt112	0.833077	0.61246	0.443835	1.82681e-111	5.06246e-107	tRNA methyltransferase subunit 11-2 [Source:ZFIN;Acc:ZDB-GENE-050522-30]	GO:0018364(peptidyl-glutamine methylation);GO:0030488(tRNA methylation);GO:0046982(protein heterodimerization activity);GO:0070476(rRNA (guanine-N7)-methylation)	NA	K15448	NA
2	ENSDARG00000039268	emc4	0.740772	0.581361	0.349595	2.06211e-111	5.71453e-107	ER membrane protein complex subunit 4 [Source:ZFIN;Acc:ZDB-GENE-040426-1891]	GO:0016020(membrane);GO:0016021(integral component of membrane)	NA	NA	NA
2	ENSDARG00000063341	czib	0.783194	0.577116	0.440509	2.24872e-111	6.23165e-107	CXXC motif containing zinc binding protein [Source:ZFIN;Acc:ZDB-GENE-061207-34]	NA	NA	NA	NA
2	ENSDARG00000074790	rab5if	0.970186	0.715703	0.438899	3.99703e-111	1.10766e-106	RAB5 interacting factor [Source:ZFIN;Acc:ZDB-GENE-030131-5938]	GO:0016020(membrane);GO:0016021(integral component of membrane)	NA	NA	NA
2	ENSDARG00000056903	mrpl13	0.863959	0.621016	0.476334	4.02096e-111	1.11429e-106	mitochondrial ribosomal protein L13 [Source:ZFIN;Acc:ZDB-GENE-050522-167]	GO:0003729(mRNA binding);GO:0003735(structural constituent of ribosome);GO:0005762(mitochondrial large ribosomal subunit);GO:0005840(ribosome);GO:0006412(translation);GO:0017148(negative regulation of translation)	03010(Ribosome)	K02871	NA
2	ENSDARG00000045928	psma4	3.52826	1.90866	0.886392	4.08614e-111	1.13235e-106	proteasome subunit alpha 4 [Source:ZFIN;Acc:ZDB-GENE-040426-1932]	GO:0000502(proteasome complex);GO:0004175(endopeptidase activity);GO:0004298(threonine-type endopeptidase activity);GO:0005634(nucleus);GO:0005737(cytoplasm);GO:0005839(proteasome core complex);GO:0006508(proteolysis);GO:0006511(ubiquitin-dependent protein catabolic process);GO:0008233(peptidase activity);GO:0010498(proteasomal protein catabolic process);GO:0010499(proteasomal ubiquitin-independe…	03050(Proteasome)	K02728	EC:3.4.25.1
2	ENSDARG00000019332	ndufb4	1.46398	1.03136	0.505356	4.31575e-111	1.19598e-106	NADH:ubiquinone oxidoreductase subunit B4 [Source:ZFIN;Acc:ZDB-GENE-040426-1973]	GO:0005739(mitochondrion);GO:0008137(NADH dehydrogenase (ubiquinone) activity);GO:0016020(membrane);GO:0016021(integral component of membrane);GO:0055114(oxidation-reduction process)	00190(Oxidative phosphorylation)	K03960	NA
2	ENSDARG00000037867	atp5mf	3.73658	2.04815	0.8674	6.33089e-111	1.75442e-106	ATP synthase membrane subunit f [Source:ZFIN;Acc:ZDB-GENE-050309-87]	GO:0003674(molecular_function);GO:0008150(biological_process);GO:0016020(membrane);GO:0016021(integral component of membrane)	00190(Oxidative phosphorylation)	K02130	NA
2	ENSDARG00000007720	sub1b	0.900203	0.683291	0.39775	8.98359e-111	2.48953e-106	SUB1 homolog, transcriptional regulator b [Source:ZFIN;Acc:ZDB-GENE-040718-209]	GO:0003677(DNA binding);GO:0003713(transcription coactivator activity);GO:0005634(nucleus);GO:0005667(transcription factor complex);GO:0006355(regulation of transcription, DNA-templated);GO:0060261(positive regulation of transcription initiation from RNA polymerase II promoter)	NA	NA	NA
2	ENSDARG00000018903	aimp2	1.05841	0.842307	0.32948	1.09615e-110	3.03764e-106	aminoacyl tRNA synthetase complex-interacting multifunctional protein 2 [Source:ZFIN;Acc:ZDB-GENE-040426-2652]	GO:0003674(molecular_function);GO:0005575(cellular_component);GO:0008150(biological_process)	NA	K15438	NA
2	ENSDARG00000063177	manf	2.34735	1.22601	0.937069	1.14131e-110	3.16281e-106	mesencephalic astrocyte-derived neurotrophic factor [Source:ZFIN;Acc:ZDB-GENE-060929-640]	GO:0003674(molecular_function);GO:0005615(extracellular space);GO:0005783(endoplasmic reticulum);GO:0031175(neuron projection development);GO:0071542(dopaminergic neuron differentiation)	NA	K22556	NA
2	ENSDARG00000090462	mrpl20	0.713304	0.536243	0.411632	1.14528e-110	3.1738e-106	mitochondrial ribosomal protein L20 [Source:ZFIN;Acc:ZDB-GENE-030131-5299]	GO:0000027(ribosomal large subunit assembly);GO:0003735(structural constituent of ribosome);GO:0005622(intracellular);GO:0005761(mitochondrial ribosome);GO:0005840(ribosome);GO:0006412(translation);GO:0019843(rRNA binding)	03010(Ribosome)	K02887	NA
2	ENSDARG00000010113	ndufb8	2.55672	1.49961	0.76971	1.33799e-110	3.70785e-106	NADH:ubiquinone oxidoreductase subunit B8 [Source:ZFIN;Acc:ZDB-GENE-040426-1858]	GO:0003954(NADH dehydrogenase activity);GO:0005739(mitochondrion);GO:0005743(mitochondrial inner membrane);GO:0005747(mitochondrial respiratory chain complex I);GO:0006120(mitochondrial electron transport, NADH to ubiquinone);GO:0008137(NADH dehydrogenase (ubiquinone) activity);GO:0016020(membrane);GO:0016021(integral component of membrane);GO:0055114(oxidation-reduction process);GO:0070469(respi…	00190(Oxidative phosphorylation)	K03964	NA
2	ENSDARG00000056167	hspe1	2.79051	1.59641	0.805694	1.45571e-110	4.03408e-106	heat shock 10 protein 1 [Source:ZFIN;Acc:ZDB-GENE-000906-2]	GO:0005737(cytoplasm);GO:0005759(mitochondrial matrix);GO:0006457(protein folding);GO:0046872(metal ion binding);GO:0051082(unfolded protein binding);GO:0051085(chaperone cofactor-dependent protein refolding);GO:0051087(chaperone binding)	NA	K04078	NA
2	ENSDARG00000040245	kpnb3	0.89711	0.69447	0.369374	1.6372e-110	4.537e-106	karyopherin (importin) beta 3 [Source:ZFIN;Acc:ZDB-GENE-030424-2]	GO:0005515(protein binding);GO:0005737(cytoplasm);GO:0006606(protein import into nucleus);GO:0006607(NLS-bearing protein import into nucleus);GO:0006610(ribosomal protein import into nucleus);GO:0008139(nuclear localization sequence binding);GO:0008565(protein transporter activity);GO:0031965(nuclear membrane);GO:0034399(nuclear periphery)	NA	K20222	NA
2	ENSDARG00000026180	prpf8	1.10534	0.817937	0.434422	2.17786e-110	6.03528e-106	pre-mRNA processing factor 8 [Source:ZFIN;Acc:ZDB-GENE-030131-577]	GO:0000244(spliceosomal tri-snRNP complex assembly);GO:0000386(second spliceosomal transesterification activity);GO:0000398(mRNA splicing, via spliceosome);GO:0003723(RNA binding);GO:0005515(protein binding);GO:0005681(spliceosomal complex);GO:0005682(U5 snRNP);GO:0017070(U6 snRNA binding);GO:0030619(U1 snRNA binding);GO:0030620(U2 snRNA binding);GO:0030623(U5 snRNA binding);GO:0071013(catalytic …	03040(Spliceosome)	K12856	NA
2	ENSDARG00000052480	pdcd11	0.959521	0.712438	0.429549	2.3537e-110	6.52256e-106	programmed cell death 11 [Source:ZFIN;Acc:ZDB-GENE-030131-4076]	GO:0003676(nucleic acid binding);GO:0005515(protein binding);GO:0005634(nucleus);GO:0005730(nucleolus);GO:0006396(RNA processing);GO:0006397(mRNA processing);GO:0032040(small-subunit processome)	NA	K14792	NA
2	ENSDARG00000057529	itpa	0.543546	0.430157	0.337538	2.76743e-110	7.66911e-106	inosine triphosphatase (nucleoside triphosphate pyrophosphatase) [Source:ZFIN;Acc:ZDB-GENE-070705-218]	GO:0000166(nucleotide binding);GO:0004551(nucleotide diphosphatase activity);GO:0005737(cytoplasm);GO:0009117(nucleotide metabolic process);GO:0009143(nucleoside triphosphate catabolic process);GO:0009204(deoxyribonucleoside triphosphate catabolic process);GO:0016787(hydrolase activity);GO:0035529(NADH pyrophosphatase activity);GO:0046872(metal ion binding);GO:0047429(nucleoside-triphosphate diph…	00230(Purine metabolism);00983(Drug metabolism - other enzymes)	K01519	EC:3.6.1.-
2	ENSDARG00000058030	hspa14	0.66938	0.549606	0.284429	2.77786e-110	7.69802e-106	heat shock protein 14 [Source:ZFIN;Acc:ZDB-GENE-041210-73]	GO:0000166(nucleotide binding);GO:0002181(cytoplasmic translation);GO:0005524(ATP binding);GO:0005737(cytoplasm);GO:0005829(cytosol);GO:0005840(ribosome);GO:0005844(polysome);GO:0006450(regulation of translational fidelity);GO:0006986(response to unfolded protein);GO:0016887(ATPase activity);GO:0031072(heat shock protein binding);GO:0034605(cellular response to heat);GO:0034620(cellular response …	NA	NA	NA
2	ENSDARG00000056186	eif5a2	5.13372	2.76237	0.894096	3.24043e-110	8.97988e-106	eukaryotic translation initiation factor 5A2 [Source:ZFIN;Acc:ZDB-GENE-040426-2405]	GO:0003723(RNA binding);GO:0003746(translation elongation factor activity);GO:0006412(translation);GO:0006452(translational frameshifting);GO:0043022(ribosome binding);GO:0045901(positive regulation of translational elongation);GO:0045905(positive regulation of translational termination)	NA	K03263	NA
2	ENSDARG00000058824	mrpl4	0.638736	0.487731	0.389132	3.95778e-110	1.09678e-105	mitochondrial ribosomal protein L4 [Source:ZFIN;Acc:ZDB-GENE-050522-388]	GO:0003735(structural constituent of ribosome);GO:0005739(mitochondrion);GO:0005762(mitochondrial large ribosomal subunit);GO:0005840(ribosome);GO:0006412(translation)	03010(Ribosome)	K02926	NA
2	ENSDARG00000094277	mrpl44	0.566804	0.437893	0.372273	4.09383e-110	1.13448e-105	mitochondrial ribosomal protein L44 [Source:ZFIN;Acc:ZDB-GENE-050913-59]	GO:0003725(double-stranded RNA binding);GO:0004525(ribonuclease III activity);GO:0005634(nucleus);GO:0006396(RNA processing);GO:0030422(production of siRNA involved in RNA interference);GO:0031053(primary miRNA processing);GO:0031054(pre-miRNA processing);GO:0090501(RNA phosphodiester bond hydrolysis);GO:0090502(RNA phosphodiester bond hydrolysis, endonucleolytic)	NA	K17425	EC:3.1.26.-
2	ENSDARG00000019222	mrpl24	0.616123	0.473147	0.38093	4.10439e-110	1.13741e-105	mitochondrial ribosomal protein L24 [Source:ZFIN;Acc:ZDB-GENE-040718-98]	GO:0003735(structural constituent of ribosome);GO:0005622(intracellular);GO:0005739(mitochondrion);GO:0005762(mitochondrial large ribosomal subunit);GO:0005840(ribosome);GO:0006412(translation)	03010(Ribosome)	K02895	NA
2	ENSDARG00000058349	polr2l	0.979007	0.717417	0.448507	4.69374e-110	1.30073e-105	polymerase (RNA) II (DNA directed) polypeptide L [Source:ZFIN;Acc:ZDB-GENE-050522-181]	GO:0001054(RNA polymerase I activity);GO:0001055(RNA polymerase II activity);GO:0001056(RNA polymerase III activity);GO:0003677(DNA binding);GO:0003899(DNA-directed 5'-3' RNA polymerase activity);GO:0005665(RNA polymerase II, core complex);GO:0005666(RNA polymerase III complex);GO:0005736(RNA polymerase I complex);GO:0006351(transcription, DNA-templated);GO:0006360(transcription by RNA polymerase…	03020(RNA polymerase);04623(Cytosolic DNA-sensing pathway)	K03007	NA
2	ENSDARG00000101560	psma1	4.69168	2.57757	0.864093	5.6657e-110	1.57008e-105	proteasome subunit alpha 1 [Source:ZFIN;Acc:ZDB-GENE-040801-15]	GO:0000502(proteasome complex);GO:0004175(endopeptidase activity);GO:0004298(threonine-type endopeptidase activity);GO:0005634(nucleus);GO:0005737(cytoplasm);GO:0005839(proteasome core complex);GO:0006508(proteolysis);GO:0006511(ubiquitin-dependent protein catabolic process);GO:0008233(peptidase activity);GO:0010498(proteasomal protein catabolic process);GO:0010499(proteasomal ubiquitin-independe…	03050(Proteasome)	K02725	EC:3.4.25.1
2	ENSDARG00000030756	dnmt1	1.00781	0.687808	0.551142	6.02547e-110	1.66978e-105	DNA (cytosine-5-)-methyltransferase 1 [Source:ZFIN;Acc:ZDB-GENE-990714-15]	GO:0001889(liver development);GO:0002088(lens development in camera-type eye);GO:0003677(DNA binding);GO:0003682(chromatin binding);GO:0003886(DNA (cytosine-5-)-methyltransferase activity);GO:0005634(nucleus);GO:0006306(DNA methylation);GO:0007368(determination of left/right symmetry);GO:0008168(methyltransferase activity);GO:0008270(zinc ion binding);GO:0010216(maintenance of DNA methylation);GO…	00270(Cysteine and methionine metabolism)	K00558	EC:2.1.1.37
2	ENSDARG00000038768	mrpl12	1.74294	1.10977	0.651261	6.18393e-110	1.71369e-105	mitochondrial ribosomal protein L12 [Source:ZFIN;Acc:ZDB-GENE-050417-187]	GO:0003735(structural constituent of ribosome);GO:0005622(intracellular);GO:0005762(mitochondrial large ribosomal subunit);GO:0005840(ribosome);GO:0006390(mitochondrial transcription);GO:0006412(translation)	03010(Ribosome)	K02935	NA
2	ENSDARG00000037038	psmc6	0.972227	0.690283	0.494104	6.5698e-110	1.82062e-105	proteasome 26S subunit, ATPase 6 [Source:ZFIN;Acc:ZDB-GENE-030131-304]	GO:0000166(nucleotide binding);GO:0000502(proteasome complex);GO:0005524(ATP binding);GO:0005737(cytoplasm);GO:0006508(proteolysis);GO:0008233(peptidase activity);GO:0008540(proteasome regulatory particle, base subcomplex);GO:0016787(hydrolase activity);GO:0030163(protein catabolic process);GO:0030433(ubiquitin-dependent ERAD pathway);GO:0031597(cytosolic proteasome complex);GO:0036402(proteasome…	03050(Proteasome)	K03064	NA
2	ENSDARG00000007141	psmc3	0.931695	0.679415	0.455564	8.01122e-110	2.22007e-105	proteasome 26S subunit, ATPase 3 [Source:ZFIN;Acc:ZDB-GENE-030131-666]	GO:0000166(nucleotide binding);GO:0005524(ATP binding);GO:0005737(cytoplasm);GO:0008540(proteasome regulatory particle, base subcomplex);GO:0016787(hydrolase activity);GO:0030163(protein catabolic process);GO:0036402(proteasome-activating ATPase activity);GO:0045899(positive regulation of RNA polymerase II transcriptional preinitiation complex assembly);GO:1901800(positive regulation of proteasom…	03050(Proteasome)	K03065	NA
2	ENSDARG00000052966	nmt1a	0.550532	0.433215	0.345741	8.0861e-110	2.24082e-105	N-myristoyltransferase 1a [Source:ZFIN;Acc:ZDB-GENE-050522-477]	GO:0004379(glycylpeptide N-tetradecanoyltransferase activity);GO:0005737(cytoplasm);GO:0006499(N-terminal protein myristoylation);GO:0016740(transferase activity);GO:0016746(transferase activity, transferring acyl groups);GO:0018008(N-terminal peptidyl-glycine N-myristoylation)	NA	K00671	EC:2.3.1.97
2	ENSDARG00000095705	CDPF1	0.579245	0.474336	0.288265	9.8305e-110	2.72423e-105	si:ch211-239e6.4 [Source:ZFIN;Acc:ZDB-GENE-041210-170]	GO:0003674(molecular_function);GO:0005575(cellular_component);GO:0008150(biological_process)	NA	NA	NA
2	ENSDARG00000024465	mrps18a	0.689974	0.50788	0.442053	1.04737e-109	2.90247e-105	mitochondrial ribosomal protein S18A [Source:ZFIN;Acc:ZDB-GENE-041210-109]	GO:0003735(structural constituent of ribosome);GO:0005622(intracellular);GO:0005763(mitochondrial small ribosomal subunit);GO:0005840(ribosome);GO:0006412(translation);GO:0070181(small ribosomal subunit rRNA binding)	03010(Ribosome)	K02963	NA
2	ENSDARG00000053047	eif2s2	3.81682	2.10819	0.856369	1.35445e-109	3.75344e-105	eukaryotic translation initiation factor 2, subunit 2 beta [Source:ZFIN;Acc:ZDB-GENE-030131-3085]	GO:0003743(translation initiation factor activity);GO:0006413(translational initiation)	03013(RNA transport)	K03238	NA
2	ENSDARG00000076283	snrpd3l	1.2372	0.846365	0.547723	1.47057e-109	4.07525e-105	small nuclear ribonucleoprotein D3 polypeptide, like [Source:ZFIN;Acc:ZDB-GENE-030131-5219]	GO:0000243(commitment complex);GO:0000387(spliceosomal snRNP assembly);GO:0003723(RNA binding);GO:0005634(nucleus);GO:0005681(spliceosomal complex);GO:0005682(U5 snRNP);GO:0005685(U1 snRNP);GO:0005686(U2 snRNP);GO:0005687(U4 snRNP);GO:0005689(U12-type spliceosomal complex);GO:0006396(RNA processing);GO:0006397(mRNA processing);GO:0008380(RNA splicing);GO:0034715(pICln-Sm protein complex);GO:00347…	03040(Spliceosome)	K11088	NA
2	ENSDARG00000013016	pole4	0.62033	0.481412	0.365764	1.49309e-109	4.13766e-105	polymerase (DNA-directed), epsilon 4, accessory subunit [Source:ZFIN;Acc:ZDB-GENE-050522-309]	GO:0005634(nucleus);GO:0008622(epsilon DNA polymerase complex);GO:0046982(protein heterodimerization activity)	03030(DNA replication);03410(Base excision repair);03420(Nucleotide excision repair)	K03506	EC:2.7.7.7
2	ENSDARG00000076526	gar1	0.944081	0.669393	0.496058	1.76271e-109	4.88481e-105	GAR1 homolog, ribonucleoprotein [Source:ZFIN;Acc:ZDB-GENE-040426-893]	GO:0001522(pseudouridine synthesis);GO:0003723(RNA binding);GO:0005634(nucleus);GO:0005730(nucleolus);GO:0006364(rRNA processing);GO:0031429(box H/ACA snoRNP complex);GO:0042254(ribosome biogenesis)	03008(Ribosome biogenesis in eukaryotes)	K11128	NA
2	ENSDARG00000090309	ubxn1	0.575226	0.450546	0.352454	1.89734e-109	5.25792e-105	UBX domain protein 1 [Source:ZFIN;Acc:ZDB-GENE-030131-792]	GO:0005515(protein binding)	NA	NA	NA
2	ENSDARG00000090386	cd3eap	0.889489	0.737961	0.269432	1.9649e-109	5.44513e-105	CD3e molecule, epsilon associated protein [Source:ZFIN;Acc:ZDB-GENE-101202-2]	GO:0006360(transcription by RNA polymerase I)	NA	NA	NA
2	ENSDARG00000019404	atp5f1d	3.93498	2.15589	0.868069	1.98848e-109	5.51048e-105	ATP synthase F1 subunit delta [Source:ZFIN;Acc:ZDB-GENE-030131-7649]	GO:0000275(mitochondrial proton-transporting ATP synthase complex, catalytic core F(1));GO:0015986(ATP synthesis coupled proton transport);GO:0045261(proton-transporting ATP synthase complex, catalytic core F(1));GO:0046933(proton-transporting ATP synthase activity, rotational mechanism);GO:0099132(ATP hydrolysis coupled cation transmembrane transport)	00190(Oxidative phosphorylation)	K02134	NA
2	ENSDARG00000020679	clpp	0.675809	0.49582	0.446799	2.1222e-109	5.88105e-105	caseinolytic mitochondrial matrix peptidase proteolytic subunit [Source:ZFIN;Acc:ZDB-GENE-030131-7860]	GO:0004176(ATP-dependent peptidase activity);GO:0004252(serine-type endopeptidase activity);GO:0006508(proteolysis);GO:0006515(protein quality control for misfolded or incompletely synthesized proteins);GO:0008233(peptidase activity);GO:0008236(serine-type peptidase activity);GO:0009368(endopeptidase Clp complex);GO:0016787(hydrolase activity);GO:0042802(identical protein binding);GO:0051117(ATPa…	NA	K01358	EC:3.4.21.92
2	ENSDARG00000052712	suclg1	1.29864	0.884767	0.553631	2.14337e-109	5.9397e-105	succinate-CoA ligase, alpha subunit [Source:ZFIN;Acc:ZDB-GENE-040912-101]	GO:0000166(nucleotide binding);GO:0003824(catalytic activity);GO:0004550(nucleoside diphosphate kinase activity);GO:0004775(succinate-CoA ligase (ADP-forming) activity);GO:0004776(succinate-CoA ligase (GDP-forming) activity);GO:0005739(mitochondrion);GO:0005829(cytosol);GO:0006099(tricarboxylic acid cycle);GO:0006104(succinyl-CoA metabolic process);GO:0006105(succinate metabolic process);GO:00061…	00020(Citrate cycle (TCA cycle));00640(Propanoate metabolism)	K01899	6.2.1.5;EC:6.2.1.4
2	ENSDARG00000005536	ubr7	0.820297	0.60585	0.437188	2.33425e-109	6.46867e-105	ubiquitin protein ligase E3 component n-recognin 7 [Source:ZFIN;Acc:ZDB-GENE-030131-1535]	GO:0005575(cellular_component);GO:0005737(cytoplasm);GO:0008270(zinc ion binding);GO:0016567(protein ubiquitination);GO:0046872(metal ion binding);GO:0061630(ubiquitin protein ligase activity)	NA	K11979	EC:2.3.2.27
2	ENSDARG00000035043	pfdn5	1.08526	0.834172	0.379626	3.70675e-109	1.02722e-104	prefoldin 5 [Source:ZFIN;Acc:ZDB-GENE-030131-6858]	GO:0005737(cytoplasm);GO:0006457(protein folding);GO:0016272(prefoldin complex);GO:0051082(unfolded protein binding)	NA	K04797	NA
2	ENSDARG00000005551	hnrnph1l	1.20181	0.985694	0.285999	4.1206e-109	1.1419e-104	heterogeneous nuclear ribonucleoprotein H1, like [Source:ZFIN;Acc:ZDB-GENE-030131-275]	GO:0003676(nucleic acid binding);GO:0003723(RNA binding)	NA	K12898	NA
2	ENSDARG00000007285	mrpl57	0.966118	0.679479	0.50777	4.26217e-109	1.18113e-104	mitochondrial ribosomal protein L57 [Source:ZFIN;Acc:ZDB-GENE-040426-1745]	GO:0003735(structural constituent of ribosome);GO:0005739(mitochondrion);GO:0005761(mitochondrial ribosome);GO:0005840(ribosome);GO:0006412(translation)	NA	NA	NA
2	ENSDARG00000035573	AK6	0.814071	0.646738	0.331973	4.67645e-109	1.29594e-104	zgc:86811 [Source:ZFIN;Acc:ZDB-GENE-040625-113]	GO:0000166(nucleotide binding);GO:0004017(adenylate kinase activity);GO:0005524(ATP binding);GO:0005634(nucleus);GO:0005654(nucleoplasm);GO:0005737(cytoplasm);GO:0015030(Cajal body);GO:0016301(kinase activity);GO:0016310(phosphorylation);GO:0016740(transferase activity);GO:0016887(ATPase activity);GO:0046940(nucleoside monophosphate phosphorylation)	00230(Purine metabolism);03008(Ribosome biogenesis in eukaryotes)	K18532	EC:2.7.4.3
2	ENSDARG00000020676	dpp3	0.558449	0.435485	0.358801	5.34382e-109	1.48088e-104	dipeptidyl-peptidase 3 [Source:ZFIN;Acc:ZDB-GENE-030131-1247]	GO:0004177(aminopeptidase activity);GO:0005737(cytoplasm);GO:0006508(proteolysis);GO:0008233(peptidase activity);GO:0008237(metallopeptidase activity);GO:0008239(dipeptidyl-peptidase activity);GO:0016787(hydrolase activity);GO:0046872(metal ion binding)	NA	K01277	EC:3.4.14.4
2	ENSDARG00000056583	ndufs6	0.901554	0.663412	0.442509	7.14638e-109	1.98041e-104	NADH:ubiquinone oxidoreductase subunit S6 [Source:ZFIN;Acc:ZDB-GENE-040912-86]	GO:0003674(molecular_function);GO:0005739(mitochondrion);GO:0005743(mitochondrial inner membrane);GO:0005747(mitochondrial respiratory chain complex I);GO:0006120(mitochondrial electron transport, NADH to ubiquinone);GO:0016020(membrane);GO:0055114(oxidation-reduction process);GO:0070469(respirasome)	00190(Oxidative phosphorylation)	K03939	NA
2	ENSDARG00000057299	pbdc1	1.04306	0.765112	0.447079	7.5369e-109	2.08862e-104	polysaccharide biosynthesis domain containing 1 [Source:ZFIN;Acc:ZDB-GENE-040718-459]	GO:0003674(molecular_function);GO:0008150(biological_process)	NA	NA	NA
2	ENSDARG00000038835	ppid	0.878768	0.660017	0.412979	8.5999e-109	2.38321e-104	peptidylprolyl isomerase D [Source:ZFIN;Acc:ZDB-GENE-040625-34]	GO:0000413(protein peptidyl-prolyl isomerization);GO:0003755(peptidyl-prolyl cis-trans isomerase activity);GO:0005515(protein binding);GO:0006457(protein folding);GO:0016018(cyclosporin A binding);GO:0016853(isomerase activity);GO:0042026(protein refolding);GO:0051082(unfolded protein binding)	04217(Necroptosis);04218(Cellular senescence)	K05864	EC:5.2.1.8
2	ENSDARG00000015088	dnajb11	1.84132	1.03683	0.82856	1.1228e-108	3.11149e-104	DnaJ heat shock protein family (Hsp40) member B11 [Source:ZFIN;Acc:ZDB-GENE-031113-9]	GO:0006457(protein folding);GO:0051082(unfolded protein binding)	04141(Protein processing in endoplasmic reticulum)	K09517	NA
2	ENSDARG00000030700	ctps1a	0.917678	0.720629	0.348731	1.18064e-108	3.27178e-104	CTP synthase 1a [Source:ZFIN;Acc:ZDB-GENE-030131-808]	GO:0000166(nucleotide binding);GO:0003883(CTP synthase activity);GO:0005524(ATP binding);GO:0006221(pyrimidine nucleotide biosynthetic process);GO:0006241(CTP biosynthetic process);GO:0006541(glutamine metabolic process);GO:0016874(ligase activity);GO:0044210('de novo' CTP biosynthetic process)	00240(Pyrimidine metabolism)	K01937	EC:6.3.4.2
2	ENSDARG00000018426	aldh7a1	0.617453	0.499746	0.305132	1.47071e-108	4.07564e-104	aldehyde dehydrogenase 7 family, member A1 [Source:ZFIN;Acc:ZDB-GENE-030131-6129]	GO:0004043(L-aminoadipate-semialdehyde dehydrogenase activity);GO:0016491(oxidoreductase activity);GO:0016620(oxidoreductase activity, acting on the aldehyde or oxo group of donors, NAD or NADP as acceptor);GO:0033339(pectoral fin development);GO:0043010(camera-type eye development);GO:0051216(cartilage development);GO:0055114(oxidation-reduction process)	00010(Glycolysis / Gluconeogenesis);00053(Ascorbate and aldarate metabolism);00071(Fatty acid degradation);00260(Glycine, serine and threonine metabolism);00280(Valine, leucine and isoleucine degradation);00310(Lysine degradation);00330(Arginine and proline metabolism);00340(Histidine metabolism);00380(Tryptophan metabolism);00410(beta-Alanine metabolism);00561(Glycerolipid metabolism);00620(Pyru…	K14085	1.2.1.3;1.2.1.8;EC:1.2.1.31
2	ENSDARG00000021107	sf3a2	1.41307	0.999207	0.499976	1.49296e-108	4.1373e-104	splicing factor 3a, subunit 2 [Source:ZFIN;Acc:ZDB-GENE-040426-897]	GO:0000245(spliceosomal complex assembly);GO:0003676(nucleic acid binding);GO:0005634(nucleus);GO:0005686(U2 snRNP);GO:0008270(zinc ion binding);GO:0046872(metal ion binding);GO:0071004(U2-type prespliceosome);GO:0071013(catalytic step 2 spliceosome)	03040(Spliceosome)	K12826	NA
2	ENSDARG00000076509	polr2d	1.30161	0.905808	0.523017	1.58115e-108	4.38168e-104	polymerase (RNA) II (DNA directed) polypeptide D [Source:ZFIN;Acc:ZDB-GENE-040714-2]	GO:0000166(nucleotide binding);GO:0000288(nuclear-transcribed mRNA catabolic process, deadenylation-dependent decay);GO:0000932(P-body);GO:0003697(single-stranded DNA binding);GO:0003727(single-stranded RNA binding);GO:0003824(catalytic activity);GO:0003899(DNA-directed 5'-3' RNA polymerase activity);GO:0005665(RNA polymerase II, core complex);GO:0006352(DNA-templated transcription, initiation);G…	03020(RNA polymerase)	K03012	NA
2	ENSDARG00000052304	uqcrc1	1.2982	0.878834	0.562847	1.61834e-108	4.48474e-104	ubiquinol-cytochrome c reductase core protein 1 [Source:ZFIN;Acc:ZDB-GENE-040426-1792]	GO:0003824(catalytic activity);GO:0005739(mitochondrion);GO:0005743(mitochondrial inner membrane);GO:0006122(mitochondrial electron transport, ubiquinol to cytochrome c);GO:0046872(metal ion binding)	00190(Oxidative phosphorylation);04260(Cardiac muscle contraction)	K00414	NA
2	ENSDARG00000006290	ndufs5	1.37356	0.928288	0.565275	1.64444e-108	4.55709e-104	NADH:ubiquinone oxidoreductase subunit S5 [Source:ZFIN;Acc:ZDB-GENE-050522-437]	GO:0003674(molecular_function);GO:0005747(mitochondrial respiratory chain complex I);GO:0032981(mitochondrial respiratory chain complex I assembly)	00190(Oxidative phosphorylation)	K03938	NA
2	ENSDARG00000063333	nup210	0.703144	0.539855	0.381249	1.66722e-108	4.6202e-104	nucleoporin 210 [Source:ZFIN;Acc:ZDB-GENE-050208-132]	GO:0003674(molecular_function);GO:0005643(nuclear pore);GO:0008150(biological_process);GO:0016020(membrane);GO:0016021(integral component of membrane)	03013(RNA transport)	K14314	NA
2	ENSDARG00000027357	cd2bp2	1.08498	0.800433	0.438819	1.79939e-108	4.98646e-104	CD2 (cytoplasmic tail) binding protein 2 [Source:ZFIN;Acc:ZDB-GENE-040426-925]	GO:0005515(protein binding);GO:0005682(U5 snRNP)	NA	K13099	NA
2	ENSDARG00000102055	hadhb	0.661765	0.513407	0.366214	1.8902e-108	5.23811e-104	hydroxyacyl-CoA dehydrogenase trifunctional multienzyme complex subunit beta [Source:ZFIN;Acc:ZDB-GENE-030131-8550]	GO:0003824(catalytic activity);GO:0016740(transferase activity);GO:0016746(transferase activity, transferring acyl groups);GO:0016747(transferase activity, transferring acyl groups other than amino-acyl groups)	00062(Fatty acid elongation);00071(Fatty acid degradation);00280(Valine, leucine and isoleucine degradation)	K07509	EC:2.3.1.16
2	ENSDARG00000097797	tomm6	0.73092	0.536923	0.445	2.1578e-108	5.97969e-104	translocase of outer mitochondrial membrane 6 homolog (yeast) [Source:ZFIN;Acc:ZDB-GENE-131121-445]	GO:0005742(mitochondrial outer membrane translocase complex);GO:0016020(membrane);GO:0016021(integral component of membrane)	NA	K17772	NA
2	ENSDARG00000032985	mrpl27	0.702918	0.524186	0.423276	2.20383e-108	6.10725e-104	mitochondrial ribosomal protein L27 [Source:ZFIN;Acc:ZDB-GENE-050522-129]	GO:0003735(structural constituent of ribosome);GO:0005622(intracellular);GO:0005762(mitochondrial large ribosomal subunit);GO:0005840(ribosome);GO:0006412(translation)	03010(Ribosome)	K02899	NA
2	ENSDARG00000045618	clta	0.958954	0.735694	0.382356	3.11283e-108	8.62628e-104	clathrin, light chain A [Source:ZFIN;Acc:ZDB-GENE-040426-1986]	GO:0005198(structural molecule activity);GO:0005886(plasma membrane);GO:0005905(clathrin-coated pit);GO:0006886(intracellular protein transport);GO:0016020(membrane);GO:0016192(vesicle-mediated transport);GO:0030125(clathrin vesicle coat);GO:0030130(clathrin coat of trans-Golgi network vesicle);GO:0030132(clathrin coat of coated pit);GO:0030659(cytoplasmic vesicle membrane);GO:0030672(synaptic ve…	04142(Lysosome);04144(Endocytosis)	K04644	NA
2	ENSDARG00000038075	cyc1	1.69696	1.1082	0.614735	3.31524e-108	9.18718e-104	cytochrome c-1 [Source:ZFIN;Acc:ZDB-GENE-031105-2]	GO:0005750(mitochondrial respiratory chain complex III);GO:0006122(mitochondrial electron transport, ubiquinol to cytochrome c);GO:0009055(electron transfer activity);GO:0020037(heme binding);GO:0042776(mitochondrial ATP synthesis coupled proton transport);GO:0045153(electron transporter, transferring electrons within CoQH2-cytochrome c reductase complex activity);GO:0046872(metal ion binding)	00190(Oxidative phosphorylation);04260(Cardiac muscle contraction)	K00413	NA
2	ENSDARG00000045514	atp5f1c	2.76018	1.5978	0.78868	3.52763e-108	9.77577e-104	ATP synthase F1 subunit gamma [Source:ZFIN;Acc:ZDB-GENE-030131-8901]	GO:0000275(mitochondrial proton-transporting ATP synthase complex, catalytic core F(1));GO:0006754(ATP biosynthetic process);GO:0006811(ion transport);GO:0015986(ATP synthesis coupled proton transport);GO:0045261(proton-transporting ATP synthase complex, catalytic core F(1));GO:0046933(proton-transporting ATP synthase activity, rotational mechanism);GO:0046961(proton-transporting ATPase activity,…	00190(Oxidative phosphorylation)	K02136	NA
2	ENSDARG00000006225	ddx39aa	1.79049	1.11742	0.680184	3.7206e-108	1.03105e-103	DEAD (Asp-Glu-Ala-Asp) box polypeptide 39Aa [Source:ZFIN;Acc:ZDB-GENE-030131-4275]	GO:0003676(nucleic acid binding);GO:0005524(ATP binding)	NA	NA	NA
2	ENSDARG00000035679	si:rp71-45k5.4	1.58302	1.04211	0.603176	3.98061e-108	1.10311e-103	si:rp71-45k5.4 [Source:ZFIN;Acc:ZDB-GENE-060503-941]	GO:0000502(proteasome complex);GO:0004175(endopeptidase activity);GO:0004298(threonine-type endopeptidase activity);GO:0005634(nucleus);GO:0005737(cytoplasm);GO:0005839(proteasome core complex);GO:0006508(proteolysis);GO:0006511(ubiquitin-dependent protein catabolic process);GO:0008233(peptidase activity);GO:0010498(proteasomal protein catabolic process);GO:0010499(proteasomal ubiquitin-independe…	03050(Proteasome)	K02726	EC:3.4.25.1
2	ENSDARG00000074985	aurkaip1	0.521307	0.410726	0.343959	4.32845e-108	1.1995e-103	aurora kinase A interacting protein 1 [Source:ZFIN;Acc:ZDB-GENE-070928-24]	GO:0003674(molecular_function);GO:0005739(mitochondrion);GO:0006397(mRNA processing)	NA	K16830	NA
2	ENSDARG00000103409	uhrf1	0.783244	0.553155	0.501779	5.00763e-108	1.38771e-103	ubiquitin-like with PHD and ring finger domains 1 [Source:ZFIN;Acc:ZDB-GENE-040426-2039]	GO:0000122(negative regulation of transcription by RNA polymerase II);GO:0000790(nuclear chromatin);GO:0000791(euchromatin);GO:0000792(heterochromatin);GO:0001889(liver development);GO:0002088(lens development in camera-type eye);GO:0003677(DNA binding);GO:0004842(ubiquitin-protein transferase activity);GO:0005515(protein binding);GO:0005634(nucleus);GO:0005657(replication fork);GO:0005720(nuclea…	NA	K10638	EC:2.3.2.27
2	ENSDARG00000016871	smarce1	1.02827	0.838913	0.293631	5.14027e-108	1.42447e-103	SWI/SNF related, matrix associated, actin dependent regulator of chromatin, subfamily e, member 1 [Source:ZFIN;Acc:ZDB-GENE-030131-967]	GO:0003677(DNA binding);GO:0005634(nucleus);GO:0016514(SWI/SNF complex);GO:0043044(ATP-dependent chromatin remodeling)	NA	K11651	NA
2	ENSDARG00000003213	naa15a	0.628663	0.498806	0.333809	5.236e-108	1.451e-103	N(alpha)-acetyltransferase 15, NatA auxiliary subunit a [Source:ZFIN;Acc:ZDB-GENE-030131-2392]	GO:0004596(peptide alpha-N-acetyltransferase activity);GO:0005515(protein binding);GO:0005737(cytoplasm);GO:0017196(N-terminal peptidyl-methionine acetylation);GO:0031415(NatA complex)	NA	K20792	NA
2	ENSDARG00000098507	lyar	1.01304	0.73981	0.453458	6.37014e-108	1.76529e-103	Ly1 antibody reactive homolog (mouse) [Source:ZFIN;Acc:ZDB-GENE-040426-1414]	GO:0003677(DNA binding);GO:0005575(cellular_component)	NA	K15263	NA
2	ENSDARG00000009447	atp5mc3b	13.3883	7.60713	0.815551	9.27397e-108	2.57e-103	ATP synthase membrane subunit c locus 3b [Source:ZFIN;Acc:ZDB-GENE-020814-1]	GO:0000276(mitochondrial proton-transporting ATP synthase complex, coupling factor F(o));GO:0006811(ion transport);GO:0008289(lipid binding);GO:0015078(proton transmembrane transporter activity);GO:0015986(ATP synthesis coupled proton transport);GO:0015991(ATP hydrolysis coupled proton transport);GO:0016020(membrane);GO:0016021(integral component of membrane);GO:0033177(proton-transporting two-se…	00190(Oxidative phosphorylation)	K02128	NA
2	ENSDARG00000008884	hprt1	0.694151	0.541087	0.35939	1.18542e-107	3.28504e-103	hypoxanthine phosphoribosyltransferase 1 [Source:ZFIN;Acc:ZDB-GENE-040426-1918]	GO:0000166(nucleotide binding);GO:0000287(magnesium ion binding);GO:0004422(hypoxanthine phosphoribosyltransferase activity);GO:0005737(cytoplasm);GO:0006166(purine ribonucleoside salvage);GO:0006168(adenine salvage);GO:0006178(guanine salvage);GO:0009116(nucleoside metabolic process);GO:0016740(transferase activity);GO:0016757(transferase activity, transferring glycosyl groups);GO:0032263(GMP sa…	00230(Purine metabolism);00983(Drug metabolism - other enzymes)	K00760	EC:2.4.2.8
2	ENSDARG00000024416	twistnb	1.65999	1.30801	0.343806	1.30952e-107	3.62894e-103	TWIST neighbor [Source:ZFIN;Acc:ZDB-GENE-041007-3]	GO:0003899(DNA-directed 5'-3' RNA polymerase activity);GO:0006351(transcription, DNA-templated)	03020(RNA polymerase)	K03004	NA
2	ENSDARG00000059398	myef2	0.58753	0.485851	0.274147	1.35886e-107	3.76567e-103	myelin expression factor 2 [Source:ZFIN;Acc:ZDB-GENE-051120-114]	GO:0000981(DNA-binding transcription factor activity, RNA polymerase II-specific);GO:0003676(nucleic acid binding);GO:0003697(single-stranded DNA binding);GO:0003723(RNA binding);GO:0003729(mRNA binding);GO:0005575(cellular_component);GO:0005634(nucleus);GO:0005737(cytoplasm);GO:0006357(regulation of transcription by RNA polymerase II);GO:0060216(definitive hemopoiesis);GO:0071014(post-mRNA relea…	NA	NA	NA
2	ENSDARG00000004427	dpy30	1.45373	0.936359	0.634627	1.37664e-107	3.81495e-103	dpy-30 histone methyltransferase complex regulatory subunit [Source:ZFIN;Acc:ZDB-GENE-040718-136]	GO:0035162(embryonic hemopoiesis);GO:0044666(MLL3/4 complex);GO:0048188(Set1C/COMPASS complex);GO:0051568(histone H3-K4 methylation)	NA	K14965	NA
2	ENSDARG00000054155	pcna	6.36215	2.77456	1.19726	1.49502e-107	4.14301e-103	proliferating cell nuclear antigen [Source:ZFIN;Acc:ZDB-GENE-000210-8]	GO:0003677(DNA binding);GO:0005634(nucleus);GO:0006260(DNA replication);GO:0006272(leading strand elongation);GO:0006275(regulation of DNA replication);GO:0006298(mismatch repair);GO:0009617(response to bacterium);GO:0014823(response to activity);GO:0019985(translesion synthesis);GO:0030337(DNA polymerase processivity factor activity);GO:0043626(PCNA complex);GO:0070557(PCNA-p21 complex)	03030(DNA replication);03410(Base excision repair);03420(Nucleotide excision repair);03430(Mismatch repair);04110(Cell cycle);04530(Tight junction)	K04802	NA
2	ENSDARG00000013729	srsf6a	0.608091	0.483232	0.331571	1.72697e-107	4.78579e-103	serine and arginine rich splicing factor 6a [Source:ZFIN;Acc:ZDB-GENE-040426-2824]	GO:0003676(nucleic acid binding);GO:0003723(RNA binding);GO:0005575(cellular_component)	03040(Spliceosome);05168(Herpes simplex virus 1 infection)	K12893	NA
2	ENSDARG00000075129	mrps11	0.594698	0.473806	0.32786	2.28282e-107	6.32616e-103	mitochondrial ribosomal protein S11 [Source:ZFIN;Acc:ZDB-GENE-040724-84]	GO:0000028(ribosomal small subunit assembly);GO:0000462(maturation of SSU-rRNA from tricistronic rRNA transcript (SSU-rRNA, 5.8S rRNA, LSU-rRNA));GO:0003735(structural constituent of ribosome);GO:0005763(mitochondrial small ribosomal subunit);GO:0005840(ribosome);GO:0006412(translation);GO:0048027(mRNA 5'-UTR binding);GO:0070181(small ribosomal subunit rRNA binding)	03010(Ribosome)	K02948	NA
2	ENSDARG00000045978	chchd6b	0.59948	0.492563	0.283405	2.5269e-107	7.00255e-103	coiled-coil-helix-coiled-coil-helix domain containing 6b [Source:ZFIN;Acc:ZDB-GENE-041114-95]	GO:0003674(molecular_function);GO:0005739(mitochondrion);GO:0005743(mitochondrial inner membrane);GO:0008150(biological_process);GO:0016020(membrane);GO:0061617(MICOS complex)	NA	K17564	NA
2	ENSDARG00000105177	ilf3b	1.08573	0.839882	0.370413	3.40864e-107	9.44602e-103	interleukin enhancer binding factor 3b [Source:ZFIN;Acc:ZDB-GENE-030131-587]	GO:0003723(RNA binding);GO:0003725(double-stranded RNA binding)	NA	K13090	NA
2	ENSDARG00000055389	si:dkey-67c22.2	1.6536	1.19285	0.471207	5.15556e-107	1.42871e-102	si:dkey-67c22.2 [Source:ZFIN;Acc:ZDB-GENE-030131-5845]	NA	NA	NA	NA
2	ENSDARG00000041530	ppih	0.789666	0.595641	0.406801	5.37196e-107	1.48868e-102	peptidylprolyl isomerase H (cyclophilin H) [Source:ZFIN;Acc:ZDB-GENE-040625-127]	GO:0000413(protein peptidyl-prolyl isomerization);GO:0001525(angiogenesis);GO:0003755(peptidyl-prolyl cis-trans isomerase activity);GO:0006457(protein folding);GO:0016018(cyclosporin A binding);GO:0016853(isomerase activity);GO:0042026(protein refolding);GO:0043021(ribonucleoprotein complex binding);GO:0045070(positive regulation of viral genome replication);GO:0051082(unfolded protein binding)	03040(Spliceosome)	K09567	EC:5.2.1.8
2	ENSDARG00000102105	dad1	4.52086	2.27969	0.987759	6.38134e-107	1.7684e-102	defender against cell death 1 [Source:ZFIN;Acc:ZDB-GENE-060503-233]	GO:0004576(oligosaccharyl transferase activity);GO:0004579(dolichyl-diphosphooligosaccharide-protein glycotransferase activity);GO:0005783(endoplasmic reticulum);GO:0005789(endoplasmic reticulum membrane);GO:0006486(protein glycosylation);GO:0006487(protein N-linked glycosylation);GO:0008250(oligosaccharyltransferase complex);GO:0016020(membrane);GO:0016021(integral component of membrane)	00510(N-Glycan biosynthesis);04141(Protein processing in endoplasmic reticulum)	K12668	NA
2	ENSDARG00000019644	ldhba	3.26435	1.82321	0.840317	8.56687e-107	2.37405e-102	lactate dehydrogenase Ba [Source:ZFIN;Acc:ZDB-GENE-991026-6]	GO:0003824(catalytic activity);GO:0004459(L-lactate dehydrogenase activity);GO:0005737(cytoplasm);GO:0005975(carbohydrate metabolic process);GO:0016491(oxidoreductase activity);GO:0016616(oxidoreductase activity, acting on the CH-OH group of donors, NAD or NADP as acceptor);GO:0019752(carboxylic acid metabolic process);GO:0055114(oxidation-reduction process)	00010(Glycolysis / Gluconeogenesis);00270(Cysteine and methionine metabolism);00620(Pyruvate metabolism);00640(Propanoate metabolism)	K00016	EC:1.1.1.27
2	ENSDARG00000009830	hdlbpa	2.21992	1.342	0.726122	8.80243e-107	2.43933e-102	high density lipoprotein binding protein a [Source:ZFIN;Acc:ZDB-GENE-030131-2032]	GO:0003676(nucleic acid binding);GO:0003723(RNA binding);GO:0071391(cellular response to estrogen stimulus)	NA	NA	NA
2	ENSDARG00000063344	fam162a	1.23117	0.981375	0.327158	9.62477e-107	2.66722e-102	family with sequence similarity 162 member A [Source:ZFIN;Acc:ZDB-GENE-030131-8307]	GO:0016020(membrane);GO:0016021(integral component of membrane)	NA	NA	NA
2	ENSDARG00000059303	hnrnpl2	0.876283	0.682346	0.360892	9.94659e-107	2.7564e-102	heterogeneous nuclear ribonucleoprotein L2 [Source:ZFIN;Acc:ZDB-GENE-040426-2707]	GO:0003676(nucleic acid binding);GO:0003723(RNA binding);GO:0005634(nucleus);GO:0006397(mRNA processing)	NA	NA	NA
2	ENSDARG00000094191	nup37	0.546993	0.42502	0.363994	1.07598e-106	2.98177e-102	nucleoporin 37 [Source:ZFIN;Acc:ZDB-GENE-040718-363]	GO:0005515(protein binding);GO:0007507(heart development);GO:0031080(nuclear pore outer ring)	03013(RNA transport)	K14302	NA
2	ENSDARG00000017728	phb2b	0.52179	0.408278	0.353918	1.50438e-106	4.16895e-102	prohibitin 2b [Source:ZFIN;Acc:ZDB-GENE-040718-430]	GO:0003674(molecular_function);GO:0016020(membrane)	NA	K17081	NA
2	ENSDARG00000037109	pwp2h	0.620933	0.48127	0.367591	1.61003e-106	4.46173e-102	PWP2, small subunit processome component [Source:ZFIN;Acc:ZDB-GENE-021031-3]	GO:0000028(ribosomal small subunit assembly);GO:0000462(maturation of SSU-rRNA from tricistronic rRNA transcript (SSU-rRNA, 5.8S rRNA, LSU-rRNA));GO:0005515(protein binding);GO:0032040(small-subunit processome);GO:0034388(Pwp2p-containing subcomplex of 90S preribosome);GO:0042254(ribosome biogenesis);GO:0055123(digestive system development)	03008(Ribosome biogenesis in eukaryotes)	K14558	NA
2	ENSDARG00000005945	sart1	0.948724	0.739776	0.358901	1.77913e-106	4.93034e-102	spliceosome associated factor 1, recruiter of U4/U6.U5 tri-snRNP [Source:ZFIN;Acc:ZDB-GENE-040718-422]	GO:0000398(mRNA splicing, via spliceosome);GO:0000481(maturation of 5S rRNA);GO:0003674(molecular_function);GO:0045292(mRNA cis splicing, via spliceosome);GO:0046540(U4/U6 x U5 tri-snRNP complex)	03040(Spliceosome)	K11984	NA
2	ENSDARG00000079949	supt16h	1.56846	1.04798	0.581735	1.87437e-106	5.19426e-102	SPT16 homolog, facilitates chromatin remodeling subunit [Source:ZFIN;Acc:ZDB-GENE-031118-96]	GO:0006368(transcription elongation from RNA polymerase II promoter);GO:0031491(nucleosome binding);GO:0032968(positive regulation of transcription elongation from RNA polymerase II promoter);GO:0034724(DNA replication-independent nucleosome organization);GO:0035101(FACT complex);GO:0042393(histone binding)	NA	NA	NA
2	ENSDARG00000030139	sdhdb	0.771094	0.562685	0.45458	2.09227e-106	5.7981e-102	succinate dehydrogenase complex, subunit D, integral membrane protein b [Source:ZFIN;Acc:ZDB-GENE-040822-17]	GO:0005739(mitochondrion);GO:0005740(mitochondrial envelope);GO:0005743(mitochondrial inner membrane);GO:0005749(mitochondrial respiratory chain complex II, succinate dehydrogenase complex (ubiquinone));GO:0006099(tricarboxylic acid cycle);GO:0006121(mitochondrial electron transport, succinate to ubiquinone);GO:0008177(succinate dehydrogenase (ubiquinone) activity);GO:0016020(membrane);GO:0016021…	00020(Citrate cycle (TCA cycle));00190(Oxidative phosphorylation)	K00237	NA
2	ENSDARG00000030441	ppa1b	1.43494	0.955813	0.586185	2.15357e-106	5.96797e-102	pyrophosphatase (inorganic) 1b [Source:ZFIN;Acc:ZDB-GENE-050417-375]	GO:0000287(magnesium ion binding);GO:0004427(inorganic diphosphatase activity);GO:0005737(cytoplasm);GO:0006796(phosphate-containing compound metabolic process)	00190(Oxidative phosphorylation)	K01507	EC:3.6.1.1
2	ENSDARG00000041921	hsbp1b	1.02059	0.783013	0.382297	2.36778e-106	6.56161e-102	heat shock factor binding protein 1b [Source:ZFIN;Acc:ZDB-GENE-040426-1721]	GO:0003714(transcription corepressor activity);GO:0007417(central nervous system development);GO:0014029(neural crest formation);GO:1903507(negative regulation of nucleic acid-templated transcription)	NA	NA	NA
2	ENSDARG00000059360	srsf3b	1.6159	1.13554	0.508957	2.73868e-106	7.58943e-102	serine and arginine rich splicing factor 3b [Source:ZFIN;Acc:ZDB-GENE-071005-2]	GO:0000381(regulation of alternative mRNA splicing, via spliceosome);GO:0003676(nucleic acid binding);GO:0003723(RNA binding);GO:0005634(nucleus);GO:0016607(nuclear speck);GO:0045292(mRNA cis splicing, via spliceosome)	03040(Spliceosome);05168(Herpes simplex virus 1 infection)	K12892	NA
2	ENSDARG00000039601	ier3ip1	0.805047	0.617544	0.382531	3.1397e-106	8.70074e-102	immediate early response 3 interacting protein 1 [Source:ZFIN;Acc:ZDB-GENE-050506-106]	GO:0003674(molecular_function);GO:0005783(endoplasmic reticulum);GO:0005789(endoplasmic reticulum membrane);GO:0006888(endoplasmic reticulum to Golgi vesicle-mediated transport);GO:0016020(membrane);GO:0016021(integral component of membrane);GO:0030134(COPII-coated ER to Golgi transport vesicle);GO:0030173(integral component of Golgi membrane)	NA	K22939	NA
2	ENSDARG00000102571	metap2b	1.56409	1.12568	0.474527	3.51687e-106	9.74596e-102	methionyl aminopeptidase 2b [Source:ZFIN;Acc:ZDB-GENE-030131-2172]	GO:0004177(aminopeptidase activity);GO:0005737(cytoplasm);GO:0006508(proteolysis);GO:0008233(peptidase activity);GO:0008235(metalloexopeptidase activity);GO:0016055(Wnt signaling pathway);GO:0016787(hydrolase activity);GO:0046872(metal ion binding);GO:0060216(definitive hemopoiesis);GO:0060218(hematopoietic stem cell differentiation);GO:0070006(metalloaminopeptidase activity);GO:0070084(protein i…	NA	K01265	EC:3.4.11.18
2	ENSDARG00000026072	pdcd5	0.79153	0.617969	0.357109	3.62264e-106	1.0039e-101	programmed cell death 5 [Source:ZFIN;Acc:ZDB-GENE-040426-980]	GO:0003677(DNA binding);GO:0005634(nucleus);GO:0005829(cytosol)	NA	K06875	NA
2	ENSDARG00000077226	smarca4a	0.859298	0.695653	0.304792	3.82934e-106	1.06119e-101	SWI/SNF related, matrix associated, actin dependent regulator of chromatin, subfamily a, member 4a [Source:ZFIN;Acc:ZDB-GENE-030605-1]	GO:0000185(activation of MAPKKK activity);GO:0001947(heart looping);GO:0003406(retinal pigment epithelium development);GO:0003407(neural retina development);GO:0005515(protein binding);GO:0005524(ATP binding);GO:0005634(nucleus);GO:0006355(regulation of transcription, DNA-templated);GO:0007417(central nervous system development);GO:0010842(retina layer formation);GO:0014032(neural crest cell deve…	NA	K11647	EC:3.6.4.-
2	ENSDARG00000020527	nup62l	0.597924	0.491108	0.283924	3.97676e-106	1.10204e-101	nucleoporin 62 like [Source:ZFIN;Acc:ZDB-GENE-030131-8491]	GO:0001889(liver development);GO:0005515(protein binding);GO:0005543(phospholipid binding);GO:0005643(nuclear pore);GO:0006606(protein import into nucleus);GO:0007507(heart development);GO:0009953(dorsal/ventral pattern formation);GO:0017056(structural constituent of nuclear pore);GO:0030514(negative regulation of BMP signaling pathway);GO:0031017(exocrine pancreas development);GO:0044613(nuclear…	03013(RNA transport)	K14306	NA
2	ENSDARG00000014230	dlst	0.983074	0.736917	0.415799	4.01741e-106	1.11331e-101	dihydrolipoamide S-succinyltransferase [Source:ZFIN;Acc:ZDB-GENE-030326-1]	GO:0004149(dihydrolipoyllysine-residue succinyltransferase activity);GO:0006099(tricarboxylic acid cycle);GO:0006754(ATP biosynthetic process);GO:0016746(transferase activity, transferring acyl groups);GO:0030097(hemopoiesis);GO:0045252(oxoglutarate dehydrogenase complex);GO:0060047(heart contraction);GO:0070584(mitochondrion morphogenesis)	00020(Citrate cycle (TCA cycle));00310(Lysine degradation);00380(Tryptophan metabolism)	K00658	EC:2.3.1.61
2	ENSDARG00000103740	fundc2	1.07741	0.875369	0.299609	4.4072e-106	1.22132e-101	fun14 domain containing 2 [Source:ZFIN;Acc:ZDB-GENE-041010-26]	GO:0000422(autophagy of mitochondrion);GO:0003674(molecular_function);GO:0031307(integral component of mitochondrial outer membrane)	04137(Mitophagy - animal)	K17986	NA
2	ENSDARG00000012234	psme3	0.681318	0.53745	0.342198	4.91783e-106	1.36283e-101	proteasome activator subunit 3 [Source:ZFIN;Acc:ZDB-GENE-991110-19]	GO:0000502(proteasome complex);GO:0005654(nucleoplasm);GO:0005737(cytoplasm);GO:0008537(proteasome activator complex);GO:0010950(positive regulation of endopeptidase activity);GO:0061133(endopeptidase activator activity);GO:0061136(regulation of proteasomal protein catabolic process);GO:2000045(regulation of G1/S transition of mitotic cell cycle)	03050(Proteasome)	K06698	NA
2	ENSDARG00000102115	ndufc2	1.70099	1.11119	0.614277	5.42714e-106	1.50397e-101	NADH:ubiquinone oxidoreductase subunit C2 [Source:ZFIN;Acc:ZDB-GENE-050320-87]	GO:0005739(mitochondrion);GO:0005743(mitochondrial inner membrane);GO:0005747(mitochondrial respiratory chain complex I);GO:0006120(mitochondrial electron transport, NADH to ubiquinone);GO:0008137(NADH dehydrogenase (ubiquinone) activity);GO:0016020(membrane);GO:0055114(oxidation-reduction process);GO:0070469(respirasome)	00190(Oxidative phosphorylation)	K03968	NA
2	ENSDARG00000019924	cmpk	0.744773	0.607808	0.293186	5.51583e-106	1.52855e-101	cytidylate kinase [Source:ZFIN;Acc:ZDB-GENE-040426-2113]	GO:0000166(nucleotide binding);GO:0004127(cytidylate kinase activity);GO:0004550(nucleoside diphosphate kinase activity);GO:0005524(ATP binding);GO:0005634(nucleus);GO:0005737(cytoplasm);GO:0006139(nucleobase-containing compound metabolic process);GO:0006165(nucleoside diphosphate phosphorylation);GO:0006207('de novo' pyrimidine nucleobase biosynthetic process);GO:0006221(pyrimidine nucleotide bi…	00240(Pyrimidine metabolism);00983(Drug metabolism - other enzymes)	K13800	EC:2.7.4.14
2	ENSDARG00000028119	sumo3a	1.49444	0.996446	0.584741	5.56017e-106	1.54083e-101	small ubiquitin-like modifier 3a [Source:ZFIN;Acc:ZDB-GENE-040426-2133]	GO:0005515(protein binding);GO:0005634(nucleus);GO:0005737(cytoplasm);GO:0016605(PML body);GO:0016925(protein sumoylation);GO:0031386(protein tag);GO:0043009(chordate embryonic development);GO:0044389(ubiquitin-like protein ligase binding);GO:0060216(definitive hemopoiesis)	03013(RNA transport)	K12160	NA
2	ENSDARG00000032129	gtf2f1	1.02847	0.719784	0.514864	7.03678e-106	1.95003e-101	general transcription factor IIF, polypeptide 1 [Source:ZFIN;Acc:ZDB-GENE-030131-4557]	GO:0003677(DNA binding);GO:0005634(nucleus);GO:0006367(transcription initiation from RNA polymerase II promoter);GO:0032968(positive regulation of transcription elongation from RNA polymerase II promoter)	03022(Basal transcription factors)	K03138	NA
2	ENSDARG00000029639	tomm70a	0.730052	0.607026	0.266241	7.66655e-106	2.12456e-101	translocase of outer mitochondrial membrane 70 homolog A (S. cerevisiae) [Source:ZFIN;Acc:ZDB-GENE-030131-8173]	GO:0005515(protein binding);GO:0016020(membrane);GO:0016021(integral component of membrane);GO:0055015(ventricular cardiac muscle cell development)	NA	K17768	NA
2	ENSDARG00000027099	psmc4	1.51042	0.989977	0.609484	8.38405e-106	2.32339e-101	proteasome 26S subunit, ATPase 4 [Source:ZFIN;Acc:ZDB-GENE-030131-5083]	GO:0000166(nucleotide binding);GO:0005524(ATP binding);GO:0005737(cytoplasm);GO:0008540(proteasome regulatory particle, base subcomplex);GO:0016787(hydrolase activity);GO:0030163(protein catabolic process);GO:0031597(cytosolic proteasome complex);GO:0036402(proteasome-activating ATPase activity);GO:0045202(synapse);GO:0045899(positive regulation of RNA polymerase II transcriptional preinitiation …	03050(Proteasome)	K03063	NA
2	ENSDARG00000037000	fkbp11	1.71156	0.929048	0.881483	8.80189e-106	2.43918e-101	FKBP prolyl isomerase 11 [Source:ZFIN;Acc:ZDB-GENE-030616-357]	GO:0000413(protein peptidyl-prolyl isomerization);GO:0003755(peptidyl-prolyl cis-trans isomerase activity);GO:0016020(membrane);GO:0016021(integral component of membrane);GO:0016853(isomerase activity);GO:0071391(cellular response to estrogen stimulus)	NA	K09576	EC:5.2.1.8
2	ENSDARG00000103799	kars	2.68081	1.53421	0.805171	9.81792e-106	2.72074e-101	lysyl-tRNA synthetase [Source:ZFIN;Acc:ZDB-GENE-021115-8]	GO:0000049(tRNA binding);GO:0000166(nucleotide binding);GO:0000187(activation of MAPK activity);GO:0002276(basophil activation involved in immune response);GO:0003676(nucleic acid binding);GO:0003877(ATP adenylyltransferase activity);GO:0004812(aminoacyl-tRNA ligase activity);GO:0004824(lysine-tRNA ligase activity);GO:0005524(ATP binding);GO:0005615(extracellular space);GO:0005634(nucleus);GO:000…	00970(Aminoacyl-tRNA biosynthesis)	K04567	EC:6.1.1.6
2	ENSDARG00000014313	atp5pf	4.60534	2.53541	0.861087	9.99904e-106	2.77093e-101	ATP synthase peripheral stalk subunit F6 [Source:ZFIN;Acc:ZDB-GENE-040426-2534]	GO:0000276(mitochondrial proton-transporting ATP synthase complex, coupling factor F(o));GO:0005739(mitochondrion);GO:0005743(mitochondrial inner membrane);GO:0005753(mitochondrial proton-transporting ATP synthase complex);GO:0006811(ion transport);GO:0015078(proton transmembrane transporter activity);GO:0015986(ATP synthesis coupled proton transport);GO:0016020(membrane)	00190(Oxidative phosphorylation)	K02131	NA
2	ENSDARG00000004189	cbx1a	0.582104	0.451586	0.366276	1.02007e-105	2.82681e-101	chromobox homolog 1a (HP1 beta homolog Drosophila) [Source:ZFIN;Acc:ZDB-GENE-030131-4945]	GO:0005634(nucleus)	NA	K11585	NA
2	ENSDARG00000035324	hnrnpl	0.751439	0.582959	0.366263	1.18584e-105	3.28619e-101	heterogeneous nuclear ribonucleoprotein L [Source:ZFIN;Acc:ZDB-GENE-040426-710]	GO:0003676(nucleic acid binding);GO:0003723(RNA binding);GO:0005634(nucleus);GO:0006397(mRNA processing)	NA	K13159	NA
2	ENSDARG00000039913	tmem147	0.623565	0.489794	0.348363	1.22144e-105	3.38486e-101	transmembrane protein 147 [Source:ZFIN;Acc:ZDB-GENE-040718-187]	GO:0016020(membrane);GO:0016021(integral component of membrane)	NA	NA	NA
2	ENSDARG00000091931	gpatch4	0.533564	0.437392	0.286734	1.36027e-105	3.76959e-101	G patch domain containing 4 [Source:ZFIN;Acc:ZDB-GENE-041008-158]	GO:0003676(nucleic acid binding);GO:0005575(cellular_component);GO:0008150(biological_process)	NA	NA	NA
2	ENSDARG00000091831	ddx27	1.23718	0.929161	0.41306	1.40674e-105	3.89836e-101	DEAD (Asp-Glu-Ala-Asp) box polypeptide 27 [Source:ZFIN;Acc:ZDB-GENE-031001-8]	GO:0000166(nucleotide binding);GO:0003676(nucleic acid binding);GO:0004386(helicase activity);GO:0005524(ATP binding);GO:0016787(hydrolase activity)	NA	K13181	EC:3.6.4.13
2	ENSDARG00000079823	mrps36	0.643135	0.5012	0.359735	1.6326e-105	4.52426e-101	mitochondrial ribosomal protein S36 [Source:ZFIN;Acc:ZDB-GENE-081104-343]	GO:0004591(oxoglutarate dehydrogenase (succinyl-transferring) activity);GO:0006103(2-oxoglutarate metabolic process);GO:0009353(mitochondrial oxoglutarate dehydrogenase complex);GO:0055114(oxidation-reduction process)	NA	K17414	NA
2	ENSDARG00000070674	psmd6	0.82069	0.59959	0.452859	1.63477e-105	4.53028e-101	proteasome 26S subunit, non-ATPase 6 [Source:ZFIN;Acc:ZDB-GENE-040426-1038]	GO:0005515(protein binding);GO:0005838(proteasome regulatory particle);GO:0030234(enzyme regulator activity);GO:0043161(proteasome-mediated ubiquitin-dependent protein catabolic process);GO:0050790(regulation of catalytic activity);GO:0070306(lens fiber cell differentiation)	03050(Proteasome)	K03037	NA
2	ENSDARG00000035699	srp19	0.664758	0.52006	0.354151	1.65334e-105	4.58174e-101	signal recognition particle 19 [Source:ZFIN;Acc:ZDB-GENE-040426-2657]	GO:0005786(signal recognition particle, endoplasmic reticulum targeting);GO:0006614(SRP-dependent cotranslational protein targeting to membrane);GO:0006616(SRP-dependent cotranslational protein targeting to membrane, translocation);GO:0006617(SRP-dependent cotranslational protein targeting to membrane, signal sequence recognition);GO:0008312(7S RNA binding);GO:0048500(signal recognition particle)	03060(Protein export)	K03105	NA
2	ENSDARG00000009871	snrpc	0.897761	0.658921	0.446226	1.827e-105	5.06299e-101	small nuclear ribonucleoprotein polypeptide C [Source:ZFIN;Acc:ZDB-GENE-020419-26]	GO:0000243(commitment complex);GO:0000381(regulation of alternative mRNA splicing, via spliceosome);GO:0000387(spliceosomal snRNP assembly);GO:0000395(mRNA 5'-splice site recognition);GO:0000398(mRNA splicing, via spliceosome);GO:0003676(nucleic acid binding);GO:0003723(RNA binding);GO:0003729(mRNA binding);GO:0005634(nucleus);GO:0005685(U1 snRNP);GO:0008270(zinc ion binding);GO:0030619(U1 snRNA …	03040(Spliceosome)	K11095	NA
2	ENSDARG00000035631	sdf2l1	1.33413	0.821834	0.698982	2.29348e-105	6.35569e-101	stromal cell-derived factor 2-like 1 [Source:ZFIN;Acc:ZDB-GENE-040808-46]	GO:0005789(endoplasmic reticulum membrane);GO:0016020(membrane);GO:0071712(ER-associated misfolded protein catabolic process)	NA	NA	NA
2	ENSDARG00000099241	ppp2cb	1.22865	1.00858	0.284746	2.3731e-105	6.57633e-101	protein phosphatase 2, catalytic subunit, beta isozyme [Source:ZFIN;Acc:ZDB-GENE-040426-2487]	GO:0004721(phosphoprotein phosphatase activity);GO:0005575(cellular_component);GO:0006470(protein dephosphorylation);GO:0016787(hydrolase activity)	03015(mRNA surveillance pathway);04114(Oocyte meiosis);04136(Autophagy - other);04140(Autophagy - animal);04261(Adrenergic signaling in cardiomyocytes);04350(TGF-beta signaling pathway);04530(Tight junction)	K04382	EC:3.1.3.16
2	ENSDARG00000052377	psmd12	0.810791	0.599943	0.434503	2.68761e-105	7.44792e-101	proteasome 26S subunit, non-ATPase 12 [Source:ZFIN;Acc:ZDB-GENE-030131-617]	GO:0000502(proteasome complex);GO:0005737(cytoplasm);GO:0008541(proteasome regulatory particle, lid subcomplex);GO:0031595(nuclear proteasome complex);GO:0043161(proteasome-mediated ubiquitin-dependent protein catabolic process)	03050(Proteasome)	K03035	NA
2	ENSDARG00000044402	nop16	0.642647	0.497218	0.370147	2.81878e-105	7.81139e-101	NOP16 nucleolar protein homolog (yeast) [Source:ZFIN;Acc:ZDB-GENE-040718-267]	GO:0003674(molecular_function);GO:0005634(nucleus);GO:0005730(nucleolus);GO:0042273(ribosomal large subunit biogenesis)	NA	NA	NA
2	ENSDARG00000039350	ssbp1	0.688934	0.503306	0.452929	2.95497e-105	8.18881e-101	single-stranded DNA binding protein 1 [Source:ZFIN;Acc:ZDB-GENE-050417-340]	GO:0003677(DNA binding);GO:0003697(single-stranded DNA binding);GO:0005739(mitochondrion);GO:0006260(DNA replication);GO:0006264(mitochondrial DNA replication);GO:0009295(nucleoid);GO:0042645(mitochondrial nucleoid);GO:0051096(positive regulation of helicase activity)	03030(DNA replication);03430(Mismatch repair);03440(Homologous recombination)	K03111	NA
2	ENSDARG00000016548	eif5b	2.71465	1.62574	0.739671	2.9792e-105	8.25595e-101	eukaryotic translation initiation factor 5B [Source:ZFIN;Acc:ZDB-GENE-050208-20]	GO:0003743(translation initiation factor activity);GO:0003924(GTPase activity);GO:0005525(GTP binding);GO:0006413(translational initiation)	03013(RNA transport)	K03243	NA
2	ENSDARG00000054911	tmsb	1.20234	0.806121	0.576772	3.2298e-105	8.95042e-101	thymosin, beta [Source:ZFIN;Acc:ZDB-GENE-050307-5]	GO:0003779(actin binding);GO:0003785(actin monomer binding);GO:0005737(cytoplasm);GO:0005856(cytoskeleton);GO:0007015(actin filament organization);GO:0030334(regulation of cell migration);GO:0042989(sequestering of actin monomers);GO:0106014(regulation of inflammatory response to wounding)	04810(Regulation of actin cytoskeleton)	K05764	NA
2	ENSDARG00000043884	nup43	0.437236	0.359492	0.282453	7.03925e-105	1.95072e-100	nucleoporin 43 [Source:ZFIN;Acc:ZDB-GENE-040426-2533]	GO:0003674(molecular_function);GO:0005515(protein binding);GO:0007507(heart development);GO:0031080(nuclear pore outer ring)	03013(RNA transport)	K14305	NA
2	ENSDARG00000101619	micos10	1.07818	0.76541	0.494293	7.766e-105	2.15211e-100	mitochondrial contact site and cristae organizing system subunit 10 [Source:ZFIN;Acc:ZDB-GENE-060825-325]	GO:0003674(molecular_function);GO:0005739(mitochondrion);GO:0005743(mitochondrial inner membrane);GO:0008150(biological_process);GO:0016020(membrane);GO:0016021(integral component of membrane);GO:0061617(MICOS complex)	NA	K17784	NA
2	ENSDARG00000103404	uchl5	1.11492	0.767718	0.538289	1.04339e-104	2.89143e-100	ubiquitin carboxyl-terminal hydrolase L5 [Source:ZFIN;Acc:ZDB-GENE-040426-2051]	GO:0004843(thiol-dependent ubiquitin-specific protease activity);GO:0005622(intracellular);GO:0005737(cytoplasm);GO:0006508(proteolysis);GO:0006511(ubiquitin-dependent protein catabolic process);GO:0008233(peptidase activity);GO:0008234(cysteine-type peptidase activity);GO:0016579(protein deubiquitination);GO:0016787(hydrolase activity);GO:0031011(Ino80 complex);GO:0036459(thiol-dependent ubiquit…	NA	K05610	EC:3.4.19.12
2	ENSDARG00000014536	pfdn1	1.23535	0.880429	0.488641	1.09346e-104	3.03019e-100	prefoldin subunit 1 [Source:ZFIN;Acc:ZDB-GENE-050306-50]	GO:0006457(protein folding);GO:0016272(prefoldin complex);GO:0051082(unfolded protein binding)	NA	K09548	NA
2	ENSDARG00000053395	cdkn2aipnl	0.804025	0.642101	0.324439	1.18625e-104	3.28735e-100	CDKN2A interacting protein N-terminal like [Source:ZFIN;Acc:ZDB-GENE-041010-154]	GO:0003674(molecular_function);GO:0005654(nucleoplasm);GO:0005730(nucleolus)	NA	NA	NA
2	ENSDARG00000037846	hm13	1.00403	0.691075	0.538883	1.54989e-104	4.29505e-100	histocompatibility (minor) 13 [Source:ZFIN;Acc:ZDB-GENE-020802-3]	GO:0004190(aspartic-type endopeptidase activity);GO:0006465(signal peptide processing);GO:0016020(membrane);GO:0016021(integral component of membrane);GO:0033619(membrane protein proteolysis);GO:0042500(aspartic endopeptidase activity, intramembrane cleaving);GO:0043523(regulation of neuron apoptotic process);GO:0071458(integral component of cytoplasmic side of endoplasmic reticulum membrane);GO:…	NA	K09595	EC:3.4.23.-
2	ENSDARG00000020645	slc7a3a	1.16477	0.938572	0.3115	1.70202e-104	4.71664e-100	solute carrier family 7 (cationic amino acid transporter, y+ system), member 3a [Source:ZFIN;Acc:ZDB-GENE-041114-206]	GO:0000064(L-ornithine transmembrane transporter activity);GO:0006631(fatty acid metabolic process);GO:0006641(triglyceride metabolic process);GO:0006865(amino acid transport);GO:0015181(arginine transmembrane transporter activity);GO:0015189(L-lysine transmembrane transporter activity);GO:0016020(membrane);GO:0016021(integral component of membrane);GO:0022857(transmembrane transporter activity);…	NA	K13865	NA
2	ENSDARG00000011510	rcc2	1.41514	1.06455	0.410701	2.0033e-104	5.55156e-100	regulator of chromosome condensation 2 [Source:ZFIN;Acc:ZDB-GENE-040426-2213]	GO:0000775(chromosome, centromeric region);GO:0001755(neural crest cell migration);GO:0003674(molecular_function);GO:0005634(nucleus);GO:0005694(chromosome);GO:0005730(nucleolus);GO:0005737(cytoplasm);GO:0005819(spindle);GO:0005856(cytoskeleton);GO:0005886(plasma membrane);GO:0007049(cell cycle);GO:0016020(membrane);GO:0030496(midbody);GO:0051301(cell division)	NA	NA	NA
2	ENSDARG00000037261	mtap	1.17403	0.869954	0.432463	2.23358e-104	6.18969e-100	methylthioadenosine phosphorylase [Source:ZFIN;Acc:ZDB-GENE-040426-1505]	GO:0003824(catalytic activity);GO:0005634(nucleus);GO:0005737(cytoplasm);GO:0005829(cytosol);GO:0006166(purine ribonucleoside salvage);GO:0009116(nucleoside metabolic process);GO:0016740(transferase activity);GO:0016757(transferase activity, transferring glycosyl groups);GO:0016763(transferase activity, transferring pentosyl groups);GO:0017061(S-methyl-5-thioadenosine phosphorylase activity);GO:0…	00270(Cysteine and methionine metabolism)	K00772	EC:2.4.2.28
2	ENSDARG00000059725	hypk	2.1728	1.33796	0.699516	2.59039e-104	7.17848e-100	huntingtin interacting protein K [Source:ZFIN;Acc:ZDB-GENE-080515-6]	GO:0003674(molecular_function);GO:0005575(cellular_component);GO:0008150(biological_process)	NA	NA	NA
2	ENSDARG00000010316	qars	0.668704	0.505952	0.402367	2.6975e-104	7.47533e-100	glutaminyl-tRNA synthetase [Source:ZFIN;Acc:ZDB-GENE-040426-1011]	GO:0000166(nucleotide binding);GO:0004812(aminoacyl-tRNA ligase activity);GO:0004819(glutamine-tRNA ligase activity);GO:0004860(protein kinase inhibitor activity);GO:0005524(ATP binding);GO:0005737(cytoplasm);GO:0005829(cytosol);GO:0006412(translation);GO:0006418(tRNA aminoacylation for protein translation);GO:0006425(glutaminyl-tRNA aminoacylation);GO:0006469(negative regulation of protein kinas…	00970(Aminoacyl-tRNA biosynthesis)	K01886	EC:6.1.1.18
2	ENSDARG00000098378	CU694197.1	0.657008	0.522864	0.329475	3.23836e-104	8.97413e-100	NA	NA	NA	NA	NA
2	ENSDARG00000013044	ndufv2	0.840002	0.627736	0.420236	3.26776e-104	9.05563e-100	NADH:ubiquinone oxidoreductase core subunit V2 [Source:ZFIN;Acc:ZDB-GENE-040426-1713]	GO:0003954(NADH dehydrogenase activity);GO:0005747(mitochondrial respiratory chain complex I);GO:0006120(mitochondrial electron transport, NADH to ubiquinone);GO:0016491(oxidoreductase activity);GO:0046872(metal ion binding);GO:0051536(iron-sulfur cluster binding);GO:0051537(2 iron, 2 sulfur cluster binding);GO:0055114(oxidation-reduction process)	00190(Oxidative phosphorylation)	K03943	1.6.99.3;EC:7.1.1.2
2	ENSDARG00000054807	sec13	0.589134	0.463899	0.344783	3.40944e-104	9.44823e-100	SEC13 homolog, nuclear pore and COPII coat complex component [Source:ZFIN;Acc:ZDB-GENE-040426-2649]	GO:0000139(Golgi membrane);GO:0001889(liver development);GO:0005198(structural molecule activity);GO:0005515(protein binding);GO:0005829(cytosol);GO:0006888(endoplasmic reticulum to Golgi vesicle-mediated transport);GO:0007029(endoplasmic reticulum organization);GO:0010842(retina layer formation);GO:0015031(protein transport);GO:0016192(vesicle-mediated transport);GO:0030127(COPII vesicle coat);G…	03013(RNA transport);04141(Protein processing in endoplasmic reticulum);04150(mTOR signaling pathway)	K14004	NA
2	ENSDARG00000035913	yars	0.845791	0.593149	0.511907	3.60454e-104	9.98891e-100	tyrosyl-tRNA synthetase [Source:ZFIN;Acc:ZDB-GENE-030425-2]	GO:0000049(tRNA binding);GO:0000166(nucleotide binding);GO:0003723(RNA binding);GO:0004812(aminoacyl-tRNA ligase activity);GO:0004831(tyrosine-tRNA ligase activity);GO:0005524(ATP binding);GO:0005737(cytoplasm);GO:0006412(translation);GO:0006418(tRNA aminoacylation for protein translation);GO:0006437(tyrosyl-tRNA aminoacylation);GO:0016874(ligase activity)	00970(Aminoacyl-tRNA biosynthesis)	K01866	EC:6.1.1.1
2	ENSDARG00000070824	ndufb5	1.05702	0.750522	0.49403	3.86595e-104	1.07133e-99	NADH:ubiquinone oxidoreductase subunit B5 [Source:ZFIN;Acc:ZDB-GENE-011010-1]	GO:0003674(molecular_function);GO:0016020(membrane);GO:0016021(integral component of membrane)	00190(Oxidative phosphorylation)	K03961	NA
2	ENSDARG00000074552	ndufs7	1.54254	0.984496	0.647849	3.97747e-104	1.10224e-99	NADH:ubiquinone oxidoreductase core subunit S7 [Source:ZFIN;Acc:ZDB-GENE-041111-261]	GO:0003954(NADH dehydrogenase activity);GO:0005575(cellular_component);GO:0005747(mitochondrial respiratory chain complex I);GO:0008137(NADH dehydrogenase (ubiquinone) activity);GO:0009060(aerobic respiration);GO:0015990(electron transport coupled proton transport);GO:0032981(mitochondrial respiratory chain complex I assembly);GO:0046872(metal ion binding);GO:0048038(quinone binding);GO:0051536(i…	00190(Oxidative phosphorylation)	K03940	1.6.99.3;EC:7.1.1.2
2	ENSDARG00000092364	si:ch211-218c6.8	1.01148	0.703265	0.524328	5.62634e-104	1.55917e-99	si:ch211-218c6.8 [Source:ZFIN;Acc:ZDB-GENE-050419-103]	GO:0042981(regulation of apoptotic process)	NA	NA	NA
2	ENSDARG00000055357	leo1	0.596907	0.488333	0.28964	5.72764e-104	1.58724e-99	LEO1 homolog, Paf1/RNA polymerase II complex component [Source:ZFIN;Acc:ZDB-GENE-040426-2435]	GO:0005634(nucleus);GO:0006368(transcription elongation from RNA polymerase II promoter);GO:0007507(heart development);GO:0014032(neural crest cell development);GO:0016570(histone modification);GO:0016593(Cdc73/Paf1 complex);GO:0021529(spinal cord oligodendrocyte cell differentiation);GO:0021782(glial cell development);GO:0030318(melanocyte differentiation);GO:0032968(positive regulation of trans…	NA	K15177	NA
2	ENSDARG00000058467	prpf40a	1.1048	0.826357	0.418943	6.79169e-104	1.88211e-99	PRP40 pre-mRNA processing factor 40 homolog A [Source:ZFIN;Acc:ZDB-GENE-030131-274]	GO:0000398(mRNA splicing, via spliceosome);GO:0003723(RNA binding);GO:0005515(protein binding);GO:0005685(U1 snRNP);GO:0045292(mRNA cis splicing, via spliceosome);GO:0071004(U2-type prespliceosome)	03040(Spliceosome)	K12821	NA
2	ENSDARG00000002591	ruvbl1	0.68497	0.514646	0.412459	7.06127e-104	1.95682e-99	RuvB-like AAA ATPase 1 [Source:ZFIN;Acc:ZDB-GENE-030109-2]	GO:0000166(nucleotide binding);GO:0003678(DNA helicase activity);GO:0004386(helicase activity);GO:0005524(ATP binding);GO:0005634(nucleus);GO:0006281(DNA repair);GO:0006310(DNA recombination);GO:0006974(cellular response to DNA damage stimulus);GO:0016787(hydrolase activity);GO:0031011(Ino80 complex);GO:0032508(DNA duplex unwinding);GO:0035267(NuA4 histone acetyltransferase complex);GO:0043141(AT…	04310(Wnt signaling pathway)	K04499	NA
2	ENSDARG00000001890	stt3b	0.98805	0.709971	0.476823	7.3899e-104	2.04789e-99	STT3B, subunit of the oligosaccharyltransferase complex (catalytic) [Source:ZFIN;Acc:ZDB-GENE-030131-2638]	GO:0004576(oligosaccharyl transferase activity);GO:0004579(dolichyl-diphosphooligosaccharide-protein glycotransferase activity);GO:0006486(protein glycosylation);GO:0008250(oligosaccharyltransferase complex);GO:0016020(membrane);GO:0016021(integral component of membrane);GO:0018279(protein N-linked glycosylation via asparagine);GO:0043687(post-translational protein modification)	00510(N-Glycan biosynthesis);04141(Protein processing in endoplasmic reticulum)	K07151	EC:2.4.99.18
2	ENSDARG00000045092	cdk5rap3	0.439592	0.358282	0.29507	8.55613e-104	2.37107e-99	CDK5 regulatory subunit associated protein 3 [Source:ZFIN;Acc:ZDB-GENE-040625-90]	GO:0000079(regulation of cyclin-dependent protein serine/threonine kinase activity);GO:0003674(molecular_function);GO:0007346(regulation of mitotic cell cycle);GO:0055113(epiboly involved in gastrulation with mouth forming second);GO:0070586(cell-cell adhesion involved in gastrulation)	NA	NA	NA
2	ENSDARG00000042252	eif4h	1.37628	0.95256	0.530896	9.37307e-104	2.59747e-99	eukaryotic translation initiation factor 4h [Source:ZFIN;Acc:ZDB-GENE-010328-19]	GO:0001731(formation of translation preinitiation complex);GO:0002181(cytoplasmic translation);GO:0003676(nucleic acid binding);GO:0003723(RNA binding);GO:0003743(translation initiation factor activity);GO:0005844(polysome);GO:0033592(RNA strand annealing activity);GO:0034057(RNA strand-exchange activity);GO:0043024(ribosomal small subunit binding);GO:0097010(eukaryotic translation initiation fac…	NA	NA	NA
2	ENSDARG00000037259	ndufb6	0.826142	0.617729	0.419416	1.20586e-103	3.34169e-99	NADH:ubiquinone oxidoreductase subunit B [Source:ZFIN;Acc:ZDB-GENE-040426-1781]	GO:0003674(molecular_function);GO:0005747(mitochondrial respiratory chain complex I);GO:0006120(mitochondrial electron transport, NADH to ubiquinone);GO:0016020(membrane);GO:0016021(integral component of membrane)	00190(Oxidative phosphorylation)	K03962	NA
2	ENSDARG00000056803	ap1s1	0.777658	0.625773	0.313496	1.61291e-103	4.46969e-99	adaptor related protein complex 1 subunit sigma 1 [Source:ZFIN;Acc:ZDB-GENE-040426-1119]	GO:0005886(plasma membrane);GO:0006886(intracellular protein transport);GO:0007399(nervous system development);GO:0015031(protein transport);GO:0016020(membrane);GO:0016192(vesicle-mediated transport);GO:0030117(membrane coat);GO:0030198(extracellular matrix organization);GO:0048471(perinuclear region of cytoplasm)	04142(Lysosome)	K12394	NA
2	ENSDARG00000014794	uqcrc2a	0.724595	0.574813	0.334081	1.9269e-103	5.33982e-99	ubiquinol-cytochrome c reductase core protein 2a [Source:ZFIN;Acc:ZDB-GENE-040718-405]	GO:0003824(catalytic activity);GO:0004175(endopeptidase activity);GO:0005739(mitochondrion);GO:0005743(mitochondrial inner membrane);GO:0006627(protein processing involved in protein targeting to mitochondrion);GO:0017087(mitochondrial processing peptidase complex);GO:0046872(metal ion binding)	00190(Oxidative phosphorylation);04260(Cardiac muscle contraction)	K00415	NA
2	ENSDARG00000075559	ppm1g	1.08613	0.779681	0.478244	1.95551e-103	5.41912e-99	protein phosphatase, Mg2+/Mn2+ dependent, 1G [Source:ZFIN;Acc:ZDB-GENE-030425-4]	GO:0003824(catalytic activity);GO:0004721(phosphoprotein phosphatase activity);GO:0004722(protein serine/threonine phosphatase activity);GO:0004724(magnesium-dependent protein serine/threonine phosphatase activity);GO:0005634(nucleus);GO:0005654(nucleoplasm);GO:0006470(protein dephosphorylation);GO:0007417(central nervous system development);GO:0016787(hydrolase activity);GO:0043169(cation bindin…	NA	K17499	EC:3.1.3.16
2	ENSDARG00000071336	mif	2.80464	1.63071	0.782316	1.99692e-103	5.53386e-99	macrophage migration inhibitory factor [Source:ZFIN;Acc:ZDB-GENE-080708-1]	GO:0008283(cell population proliferation);GO:0043066(negative regulation of apoptotic process);GO:0048598(embryonic morphogenesis);GO:0048839(inner ear development);GO:0060117(auditory receptor cell development)	00350(Tyrosine metabolism);00360(Phenylalanine metabolism)	K07253	EC:5.3.2.1
2	ENSDARG00000012553	rap1aa	0.559762	0.459156	0.285831	2.18423e-103	6.05294e-99	RAP1A, member of RAS oncogene family a [Source:ZFIN;Acc:ZDB-GENE-040625-167]	GO:0000165(MAPK cascade);GO:0000166(nucleotide binding);GO:0000187(activation of MAPK activity);GO:0003428(chondrocyte intercalation involved in growth plate cartilage morphogenesis);GO:0003924(GTPase activity);GO:0004708(MAP kinase kinase activity);GO:0005525(GTP binding);GO:0007165(signal transduction);GO:0007507(heart development);GO:0016020(membrane);GO:0032486(Rap protein signal transduction…	04010(MAPK signaling pathway);04510(Focal adhesion);04530(Tight junction)	K04353	NA
2	ENSDARG00000017762	srrt	1.05516	0.779652	0.436553	2.40538e-103	6.6658e-99	serrate RNA effector molecule homolog (Arabidopsis) [Source:ZFIN;Acc:ZDB-GENE-020419-13]	GO:0005634(nucleus);GO:0005654(nucleoplasm);GO:0005737(cytoplasm);GO:0006397(mRNA processing);GO:0008283(cell population proliferation);GO:0031047(gene silencing by RNA);GO:0031053(primary miRNA processing)	NA	NA	NA
2	ENSDARG00000022340	ufc1	0.597271	0.47036	0.344622	2.533e-103	7.01946e-99	ubiquitin-fold modifier conjugating enzyme 1 [Source:ZFIN;Acc:ZDB-GENE-040801-268]	GO:0071568(UFM1 transferase activity);GO:0071569(protein ufmylation);GO:1990592(protein K69-linked ufmylation)	NA	K12165	NA
2	ENSDARG00000110836	tmem14ca	0.686042	0.561753	0.288361	2.57429e-103	7.13389e-99	transmembrane protein 14Ca [Source:ZFIN;Acc:ZDB-GENE-060825-156]	GO:0016020(membrane);GO:0016021(integral component of membrane)	NA	NA	NA
2	ENSDARG00000006395	rbm25b	0.952941	0.762619	0.321425	2.73573e-103	7.58126e-99	RNA binding motif protein 25b [Source:ZFIN;Acc:ZDB-GENE-030131-5547]	GO:0000381(regulation of alternative mRNA splicing, via spliceosome);GO:0003676(nucleic acid binding);GO:0003723(RNA binding);GO:0003729(mRNA binding);GO:0006397(mRNA processing)	03040(Spliceosome)	K12822	NA
2	ENSDARG00000070386	krtcap2	2.06001	1.17796	0.806363	3.65633e-103	1.01324e-98	keratinocyte associated protein 2 [Source:ZFIN;Acc:ZDB-GENE-060825-91]	GO:0003674(molecular_function);GO:0008150(biological_process);GO:0016020(membrane);GO:0016021(integral component of membrane)	NA	NA	NA
2	ENSDARG00000027590	sept2	1.2355	0.941649	0.391831	3.73552e-103	1.03519e-98	septin 2 [Source:ZFIN;Acc:ZDB-GENE-030131-911]	GO:0000166(nucleotide binding);GO:0003924(GTPase activity);GO:0005525(GTP binding);GO:0005940(septin ring);GO:0015630(microtubule cytoskeleton);GO:0031105(septin complex);GO:0032947(protein-containing complex scaffold activity);GO:0051301(cell division);GO:0060271(cilium assembly);GO:0061640(cytoskeleton-dependent cytokinesis)	NA	K16942	NA
2	ENSDARG00000101180	mcm7	0.592254	0.449174	0.398942	4.00522e-103	1.10993e-98	minichromosome maintenance complex component 7 [Source:ZFIN;Acc:ZDB-GENE-020419-27]	GO:0000166(nucleotide binding);GO:0003677(DNA binding);GO:0003678(DNA helicase activity);GO:0004386(helicase activity);GO:0005524(ATP binding);GO:0005634(nucleus);GO:0006260(DNA replication);GO:0006270(DNA replication initiation);GO:0007049(cell cycle);GO:0016787(hydrolase activity);GO:0032508(DNA duplex unwinding);GO:0042555(MCM complex)	03030(DNA replication);04110(Cell cycle)	K02210	EC:3.6.4.12
2	ENSDARG00000029252	ssb	1.81227	1.12951	0.682102	5.01961e-103	1.39103e-98	Sjogren syndrome antigen B (autoantigen La) [Source:ZFIN;Acc:ZDB-GENE-030131-223]	GO:0003676(nucleic acid binding);GO:0003723(RNA binding);GO:0005634(nucleus);GO:0006396(RNA processing);GO:1990904(ribonucleoprotein complex)	NA	NA	NA
2	ENSDARG00000001057	bysl	1.53499	1.12288	0.451024	6.07644e-103	1.6839e-98	bystin-like [Source:ZFIN;Acc:ZDB-GENE-040426-1287]	GO:0005634(nucleus);GO:0005730(nucleolus);GO:0005737(cytoplasm);GO:0006364(rRNA processing);GO:0030515(snoRNA binding);GO:0030688(preribosome, small subunit precursor)	NA	K14797	NA
2	ENSDARG00000039543	mrps6	0.653619	0.50032	0.385598	6.27722e-103	1.73954e-98	mitochondrial ribosomal protein S6 [Source:ZFIN;Acc:ZDB-GENE-060825-59]	GO:0003735(structural constituent of ribosome);GO:0005763(mitochondrial small ribosomal subunit);GO:0005840(ribosome);GO:0006412(translation);GO:0019843(rRNA binding);GO:0070181(small ribosomal subunit rRNA binding)	03010(Ribosome)	K02990	NA
2	ENSDARG00000092677	coa6	0.611308	0.490938	0.31636	7.30132e-103	2.02334e-98	cytochrome c oxidase assembly factor 6 [Source:ZFIN;Acc:ZDB-GENE-070705-152]	GO:0005739(mitochondrion);GO:0007507(heart development)	NA	K18179	NA
2	ENSDARG00000103163	tomm20a	1.37972	0.975371	0.500352	7.99894e-103	2.21667e-98	translocase of outer mitochondrial membrane 20 [Source:ZFIN;Acc:ZDB-GENE-040426-1976]	GO:0005634(nucleus);GO:0005739(mitochondrion);GO:0005741(mitochondrial outer membrane);GO:0005742(mitochondrial outer membrane translocase complex);GO:0006357(regulation of transcription by RNA polymerase II);GO:0006605(protein targeting);GO:0006886(intracellular protein transport);GO:0016020(membrane);GO:0016021(integral component of membrane);GO:0044212(transcription regulatory region DNA bindi…	NA	K17770	NA
2	ENSDARG00000015239	prpf19	0.693536	0.526458	0.397651	8.12242e-103	2.25089e-98	pre-mRNA processing factor 19 [Source:ZFIN;Acc:ZDB-GENE-030131-263]	GO:0000349(generation of catalytic spliceosome for first transesterification step);GO:0000398(mRNA splicing, via spliceosome);GO:0000974(Prp19 complex);GO:0004842(ubiquitin-protein transferase activity);GO:0005515(protein binding);GO:0006281(DNA repair);GO:0016567(protein ubiquitination);GO:0043518(negative regulation of DNA damage response, signal transduction by p53 class mediator);GO:0061630(u…	03040(Spliceosome);04120(Ubiquitin mediated proteolysis)	K10599	EC:2.3.2.27
2	ENSDARG00000059298	spcs1	1.96504	1.21184	0.697358	9.11268e-103	2.52531e-98	signal peptidase complex subunit 1 [Source:ZFIN;Acc:ZDB-GENE-050809-130]	GO:0005787(signal peptidase complex);GO:0006465(signal peptide processing);GO:0008233(peptidase activity);GO:0016020(membrane);GO:0016021(integral component of membrane);GO:0030176(integral component of endoplasmic reticulum membrane);GO:0045047(protein targeting to ER)	03060(Protein export)	K12946	EC:3.4.-.-
2	ENSDARG00000057912	eif1axb	1.868	1.2332	0.599091	1.07064e-102	2.96695e-98	eukaryotic translation initiation factor 1A X-linked b [Source:ZFIN;Acc:ZDB-GENE-030131-1319]	GO:0003723(RNA binding);GO:0003743(translation initiation factor activity);GO:0005515(protein binding);GO:0006412(translation);GO:0006413(translational initiation);GO:0043249(erythrocyte maturation);GO:0046984(regulation of hemoglobin biosynthetic process);GO:1903798(regulation of production of miRNAs involved in gene silencing by miRNA)	03013(RNA transport)	K03236	NA
2	ENSDARG00000042458	rfc4	0.788099	0.571941	0.462509	1.15619e-102	3.20403e-98	replication factor C (activator 1) 4 [Source:ZFIN;Acc:ZDB-GENE-040824-3]	GO:0003677(DNA binding);GO:0003689(DNA clamp loader activity);GO:0005524(ATP binding);GO:0005634(nucleus);GO:0005663(DNA replication factor C complex);GO:0006260(DNA replication);GO:0006261(DNA-dependent DNA replication);GO:0060041(retina development in camera-type eye)	03030(DNA replication);03420(Nucleotide excision repair);03430(Mismatch repair)	K10755	NA
2	ENSDARG00000023852	lsm4	1.35634	0.931038	0.542802	1.17824e-102	3.26515e-98	LSM4 homolog, U6 small nuclear RNA and mRNA degradation associated [Source:ZFIN;Acc:ZDB-GENE-040426-1652]	GO:0000387(spliceosomal snRNP assembly);GO:0000398(mRNA splicing, via spliceosome);GO:0000932(P-body);GO:0000956(nuclear-transcribed mRNA catabolic process);GO:0003723(RNA binding);GO:0005634(nucleus);GO:0005681(spliceosomal complex);GO:0005688(U6 snRNP);GO:0006396(RNA processing);GO:0006397(mRNA processing);GO:0008380(RNA splicing);GO:0017070(U6 snRNA binding);GO:0033962(cytoplasmic mRNA process…	03018(RNA degradation);03040(Spliceosome)	K12623	NA
2	ENSDARG00000077536	snrnp200	0.874736	0.659879	0.406647	1.18353e-102	3.2798e-98	small nuclear ribonucleoprotein 200 (U5) [Source:ZFIN;Acc:ZDB-GENE-081105-64]	GO:0000388(spliceosome conformational change to release U4 (or U4atac) and U1 (or U11));GO:0000398(mRNA splicing, via spliceosome);GO:0003676(nucleic acid binding);GO:0004004(ATP-dependent RNA helicase activity);GO:0005524(ATP binding);GO:0005634(nucleus);GO:0005681(spliceosomal complex);GO:0005682(U5 snRNP);GO:0008026(ATP-dependent helicase activity);GO:0046540(U4/U6 x U5 tri-snRNP complex);GO:0…	03040(Spliceosome)	K12854	EC:3.6.4.13
2	ENSDARG00000103422	usp10	1.39719	1.07956	0.372089	1.41843e-102	3.93074e-98	ubiquitin specific peptidase 10 [Source:ZFIN;Acc:ZDB-GENE-030219-132]	GO:0004197(cysteine-type endopeptidase activity);GO:0004843(thiol-dependent ubiquitin-specific protease activity);GO:0006511(ubiquitin-dependent protein catabolic process);GO:0016579(protein deubiquitination);GO:0036459(thiol-dependent ubiquitinyl hydrolase activity)	NA	K11841	EC:3.4.19.12
2	ENSDARG00000071691	uqcrc2b	0.823386	0.631286	0.383276	2.28606e-102	6.33512e-98	ubiquinol-cytochrome c reductase core protein 2b [Source:ZFIN;Acc:ZDB-GENE-030131-1269]	GO:0003824(catalytic activity);GO:0004175(endopeptidase activity);GO:0004222(metalloendopeptidase activity);GO:0005739(mitochondrion);GO:0005743(mitochondrial inner membrane);GO:0006508(proteolysis);GO:0006627(protein processing involved in protein targeting to mitochondrion);GO:0017087(mitochondrial processing peptidase complex);GO:0046872(metal ion binding)	00190(Oxidative phosphorylation);04260(Cardiac muscle contraction)	K00415	NA
2	ENSDARG00000040121	psma2	3.03296	1.84633	0.716064	2.51795e-102	6.97775e-98	proteasome subunit alpha 2 [Source:ZFIN;Acc:ZDB-GENE-050522-479]	GO:0000502(proteasome complex);GO:0004175(endopeptidase activity);GO:0004298(threonine-type endopeptidase activity);GO:0005634(nucleus);GO:0005737(cytoplasm);GO:0005839(proteasome core complex);GO:0006508(proteolysis);GO:0006511(ubiquitin-dependent protein catabolic process);GO:0008233(peptidase activity);GO:0010498(proteasomal protein catabolic process);GO:0010499(proteasomal ubiquitin-independe…	03050(Proteasome)	K02726	EC:3.4.25.1
2	ENSDARG00000014139	srp72	0.531997	0.429859	0.307556	3.45199e-102	9.56614e-98	signal recognition particle 72 [Source:ZFIN;Acc:ZDB-GENE-030131-5546]	GO:0005515(protein binding);GO:0005737(cytoplasm);GO:0005786(signal recognition particle, endoplasmic reticulum targeting);GO:0006614(SRP-dependent cotranslational protein targeting to membrane);GO:0006616(SRP-dependent cotranslational protein targeting to membrane, translocation);GO:0008312(7S RNA binding);GO:0048500(signal recognition particle)	03060(Protein export)	K03108	NA
2	ENSDARG00000044669	hp1bp3	0.647774	0.521315	0.313336	3.54262e-102	9.81731e-98	heterochromatin protein 1, binding protein 3 [Source:ZFIN;Acc:ZDB-GENE-060810-79]	GO:0000786(nucleosome);GO:0003677(DNA binding);GO:0003682(chromatin binding);GO:0005634(nucleus);GO:0005694(chromosome);GO:0006334(nucleosome assembly);GO:0006355(regulation of transcription, DNA-templated);GO:0070828(heterochromatin organization)	NA	NA	NA
2	ENSDARG00000037962	psmb7	1.45372	1.02149	0.509071	4.20371e-102	1.16493e-97	proteasome subunit beta 7 [Source:ZFIN;Acc:ZDB-GENE-001208-4]	GO:0000502(proteasome complex);GO:0004175(endopeptidase activity);GO:0004298(threonine-type endopeptidase activity);GO:0005634(nucleus);GO:0005737(cytoplasm);GO:0005839(proteasome core complex);GO:0006508(proteolysis);GO:0008233(peptidase activity);GO:0010498(proteasomal protein catabolic process);GO:0010499(proteasomal ubiquitin-independent protein catabolic process);GO:0016301(kinase activity);…	03050(Proteasome)	K02739	EC:3.4.25.1
2	ENSDARG00000019732	mtch2	0.519982	0.433492	0.262456	4.78332e-102	1.32555e-97	mitochondrial carrier homolog 2 [Source:ZFIN;Acc:ZDB-GENE-991008-9]	GO:0001889(liver development);GO:0005739(mitochondrion);GO:0016020(membrane);GO:0016021(integral component of membrane);GO:0043065(positive regulation of apoptotic process);GO:0045444(fat cell differentiation);GO:0048565(digestive tract development)	NA	K17885	NA
2	ENSDARG00000021945	ddx23	1.12367	0.926992	0.277593	6.13045e-102	1.69887e-97	DEAD (Asp-Glu-Ala-Asp) box polypeptide 23 [Source:ZFIN;Acc:ZDB-GENE-030131-6215]	GO:0003676(nucleic acid binding);GO:0005524(ATP binding)	03040(Spliceosome)	K12858	EC:3.6.4.13
2	ENSDARG00000032102	prdx3	1.45607	1.04143	0.483517	7.12453e-102	1.97435e-97	peroxiredoxin 3 [Source:ZFIN;Acc:ZDB-GENE-030826-18]	GO:0005737(cytoplasm);GO:0005739(mitochondrion);GO:0008379(thioredoxin peroxidase activity);GO:0016209(antioxidant activity);GO:0016491(oxidoreductase activity);GO:0034599(cellular response to oxidative stress);GO:0045454(cell redox homeostasis);GO:0051920(peroxiredoxin activity);GO:0055114(oxidation-reduction process);GO:0098869(cellular oxidant detoxification)	NA	K20011	EC:1.11.1.15
2	ENSDARG00000098935	bxdc2	1.17524	0.798494	0.5576	7.97262e-102	2.20937e-97	brix domain containing 2 [Source:ZFIN;Acc:ZDB-GENE-060518-1]	GO:0000027(ribosomal large subunit assembly);GO:0005730(nucleolus)	NA	K14820	NA
2	ENSDARG00000037284	ptges3a	0.583553	0.470887	0.309483	1.16531e-101	3.22929e-97	prostaglandin E synthase 3a (cytosolic) [Source:ZFIN;Acc:ZDB-GENE-040426-2200]	GO:0005634(nucleus);GO:0005737(cytoplasm);GO:0005829(cytosol);GO:0006457(protein folding);GO:0051087(chaperone binding);GO:0051131(chaperone-mediated protein complex assembly);GO:0051879(Hsp90 protein binding)	00590(Arachidonic acid metabolism)	K15730	EC:5.3.99.3
2	ENSDARG00000103403	sar1b	0.602518	0.492981	0.289472	1.27214e-101	3.52536e-97	secretion associated, Ras related GTPase 1B [Source:ZFIN;Acc:ZDB-GENE-040426-1958]	GO:0000166(nucleotide binding);GO:0003400(regulation of COPII vesicle coating);GO:0003924(GTPase activity);GO:0005525(GTP binding);GO:0005783(endoplasmic reticulum);GO:0005794(Golgi apparatus);GO:0006886(intracellular protein transport);GO:0006888(endoplasmic reticulum to Golgi vesicle-mediated transport);GO:0007417(central nervous system development);GO:0015031(protein transport);GO:0016050(vesi…	04141(Protein processing in endoplasmic reticulum)	K07953	EC:3.6.5.-
2	ENSDARG00000014898	ncbp2	0.703473	0.546631	0.363928	1.3153e-101	3.64495e-97	nuclear cap binding protein subunit 2 [Source:ZFIN;Acc:ZDB-GENE-020419-31]	GO:0000184(nuclear-transcribed mRNA catabolic process, nonsense-mediated decay);GO:0000339(RNA cap binding);GO:0000340(RNA 7-methylguanosine cap binding);GO:0000398(mRNA splicing, via spliceosome);GO:0003676(nucleic acid binding);GO:0003723(RNA binding);GO:0003729(mRNA binding);GO:0005634(nucleus);GO:0005737(cytoplasm);GO:0005846(nuclear cap binding complex);GO:0006397(mRNA processing);GO:0006408…	03013(RNA transport);03015(mRNA surveillance pathway);03040(Spliceosome)	K12883	NA
2	ENSDARG00000054154	bms1	1.09899	0.78807	0.479785	1.33067e-101	3.68755e-97	BMS1 ribosome biogenesis factor [Source:ZFIN;Acc:ZDB-GENE-060720-2]	GO:0000462(maturation of SSU-rRNA from tricistronic rRNA transcript (SSU-rRNA, 5.8S rRNA, LSU-rRNA));GO:0001889(liver development);GO:0003924(GTPase activity);GO:0005515(protein binding);GO:0005525(GTP binding);GO:0005634(nucleus);GO:0005730(nucleolus);GO:0006364(rRNA processing);GO:0030686(90S preribosome);GO:0031016(pancreas development);GO:0034511(U3 snoRNA binding);GO:0042254(ribosome biogene…	03008(Ribosome biogenesis in eukaryotes)	K14569	NA
2	ENSDARG00000069980	lman1	1.21203	0.741742	0.708439	1.34292e-101	3.72149e-97	lectin, mannose-binding, 1 [Source:ZFIN;Acc:ZDB-GENE-060201-4]	GO:0000139(Golgi membrane);GO:0005537(mannose binding);GO:0005789(endoplasmic reticulum membrane);GO:0005793(endoplasmic reticulum-Golgi intermediate compartment);GO:0006888(endoplasmic reticulum to Golgi vesicle-mediated transport);GO:0007029(endoplasmic reticulum organization);GO:0007030(Golgi organization);GO:0016020(membrane);GO:0016021(integral component of membrane);GO:0030134(COPII-coated …	04141(Protein processing in endoplasmic reticulum)	K10080	NA
2	ENSDARG00000022410	rrp12	0.707762	0.539104	0.3927	1.65159e-101	4.57688e-97	ribosomal RNA processing 12 homolog [Source:ZFIN;Acc:ZDB-GENE-050706-182]	GO:0008150(biological_process)	NA	K14794	NA
2	ENSDARG00000077126	snrnp70	1.17242	0.899228	0.382729	1.65996e-101	4.60008e-97	small nuclear ribonucleoprotein 70 (U1) [Source:ZFIN;Acc:ZDB-GENE-040825-2]	GO:0000398(mRNA splicing, via spliceosome);GO:0003676(nucleic acid binding);GO:0003723(RNA binding);GO:0003729(mRNA binding);GO:0005685(U1 snRNP);GO:0030619(U1 snRNA binding);GO:0060218(hematopoietic stem cell differentiation)	03040(Spliceosome)	K11093	NA
2	ENSDARG00000086699	smim15	0.968454	0.79454	0.285563	1.69462e-101	4.69612e-97	small integral membrane protein 15 [Source:ZFIN;Acc:ZDB-GENE-070410-48]	GO:0003674(molecular_function);GO:0008150(biological_process);GO:0016020(membrane);GO:0016021(integral component of membrane)	NA	NA	NA
2	ENSDARG00000004956	zmat2	0.727746	0.592271	0.297179	1.9158e-101	5.30906e-97	zinc finger, matrin-type 2 [Source:ZFIN;Acc:ZDB-GENE-030131-3197]	GO:0000398(mRNA splicing, via spliceosome);GO:0003676(nucleic acid binding);GO:0005681(spliceosomal complex);GO:0008270(zinc ion binding);GO:0046540(U4/U6 x U5 tri-snRNP complex);GO:0046872(metal ion binding)	03040(Spliceosome)	K12848	NA
2	ENSDARG00000035325	srsf7a	1.14022	0.939969	0.278633	2.22249e-101	6.15896e-97	serine and arginine rich splicing factor 7a [Source:ZFIN;Acc:ZDB-GENE-040426-1798]	GO:0000381(regulation of alternative mRNA splicing, via spliceosome);GO:0003676(nucleic acid binding);GO:0003723(RNA binding);GO:0005575(cellular_component);GO:0005634(nucleus);GO:0008270(zinc ion binding);GO:0016607(nuclear speck);GO:0045292(mRNA cis splicing, via spliceosome)	03040(Spliceosome);05168(Herpes simplex virus 1 infection)	K12896	NA
2	ENSDARG00000015427	hdac1	2.24634	1.44902	0.632497	2.40166e-101	6.65547e-97	histone deacetylase 1 [Source:ZFIN;Acc:ZDB-GENE-020419-32]	GO:0000118(histone deacetylase complex);GO:0001764(neuron migration);GO:0001889(liver development);GO:0002244(hematopoietic progenitor cell differentiation);GO:0004407(histone deacetylase activity);GO:0005634(nucleus);GO:0006325(chromatin organization);GO:0008285(negative regulation of cell population proliferation);GO:0009953(dorsal/ventral pattern formation);GO:0016055(Wnt signaling pathway);GO…	04110(Cell cycle);04330(Notch signaling pathway)	K06067	EC:3.5.1.98
2	ENSDARG00000038635	magoh	2.10112	1.28136	0.713483	2.68571e-101	7.44263e-97	mago homolog, exon junction complex subunit [Source:ZFIN;Acc:ZDB-GENE-041216-1]	GO:0000184(nuclear-transcribed mRNA catabolic process, nonsense-mediated decay);GO:0000381(regulation of alternative mRNA splicing, via spliceosome);GO:0003723(RNA binding);GO:0005634(nucleus);GO:0005737(cytoplasm);GO:0006397(mRNA processing);GO:0006417(regulation of translation);GO:0008380(RNA splicing);GO:0016607(nuclear speck);GO:0035145(exon-exon junction complex);GO:0051028(mRNA transport);G…	03013(RNA transport);03015(mRNA surveillance pathway);03040(Spliceosome)	K12877	NA
2	ENSDARG00000008551	pole3	0.67328	0.524657	0.359832	2.90778e-101	8.05804e-97	polymerase (DNA directed), epsilon 3 (p17 subunit) [Source:ZFIN;Acc:ZDB-GENE-040426-1773]	GO:0004402(histone acetyltransferase activity);GO:0005634(nucleus);GO:0005671(Ada2/Gcn5/Ada3 transcription activator complex);GO:0006974(cellular response to DNA damage stimulus);GO:0008622(epsilon DNA polymerase complex);GO:0016573(histone acetylation);GO:0034080(CENP-A containing nucleosome assembly);GO:0042766(nucleosome mobilization);GO:0046982(protein heterodimerization activity);GO:0070869(…	03030(DNA replication);03410(Base excision repair);03420(Nucleotide excision repair)	K02326	EC:2.7.7.7
2	ENSDARG00000056621	ctcf	0.7814	0.613676	0.348584	3.14402e-101	8.71272e-97	CCCTC-binding factor (zinc finger protein) [Source:ZFIN;Acc:ZDB-GENE-040624-5]	GO:0003676(nucleic acid binding);GO:0003677(DNA binding);GO:0003682(chromatin binding);GO:0003700(DNA-binding transcription factor activity);GO:0005634(nucleus);GO:0006355(regulation of transcription, DNA-templated);GO:0006357(regulation of transcription by RNA polymerase II);GO:0010468(regulation of gene expression)	NA	K23195	NA
2	ENSDARG00000025391	pfdn2	0.692004	0.543882	0.347487	3.46827e-101	9.61126e-97	prefoldin subunit 2 [Source:ZFIN;Acc:ZDB-GENE-060519-27]	GO:0005737(cytoplasm);GO:0006457(protein folding);GO:0016272(prefoldin complex);GO:0044183(protein folding chaperone);GO:0051082(unfolded protein binding)	NA	K09549	NA
2	ENSDARG00000041570	mrpl39	0.562217	0.452478	0.313279	4.16507e-101	1.15422e-96	mitochondrial ribosomal protein L39 [Source:ZFIN;Acc:ZDB-GENE-030131-6520]	GO:0000166(nucleotide binding);GO:0005739(mitochondrion);GO:0005840(ribosome)	NA	K11509;K17420	NA
2	ENSDARG00000035678	zgc:91910	0.904994	0.72299	0.323933	4.28716e-101	1.18806e-96	zgc:91910 [Source:ZFIN;Acc:ZDB-GENE-040808-48]	GO:0008150(biological_process)	NA	NA	NA
2	ENSDARG00000070723	ndufa9a	0.624644	0.496135	0.332302	4.53477e-101	1.25668e-96	NADH:ubiquinone oxidoreductase subunit A9a [Source:ZFIN;Acc:ZDB-GENE-050320-20]	GO:0001666(response to hypoxia);GO:0003954(NADH dehydrogenase activity);GO:0005747(mitochondrial respiratory chain complex I);GO:0055114(oxidation-reduction process);GO:1901006(ubiquinone-6 biosynthetic process)	00190(Oxidative phosphorylation)	K03953	NA
2	ENSDARG00000025332	rbm28	1.04308	0.836426	0.318536	4.54415e-101	1.25927e-96	RNA binding motif protein 28 [Source:ZFIN;Acc:ZDB-GENE-040426-960]	GO:0003676(nucleic acid binding);GO:0003723(RNA binding);GO:0005575(cellular_component);GO:0005730(nucleolus);GO:1990904(ribonucleoprotein complex)	03008(Ribosome biogenesis in eukaryotes)	K14573	NA
2	ENSDARG00000020467	safb	1.41091	0.961474	0.553309	4.67634e-101	1.29591e-96	scaffold attachment factor B [Source:ZFIN;Acc:ZDB-GENE-030131-698]	GO:0003676(nucleic acid binding);GO:0003723(RNA binding);GO:0005634(nucleus);GO:0006355(regulation of transcription, DNA-templated);GO:0006357(regulation of transcription by RNA polymerase II);GO:0043565(sequence-specific DNA binding);GO:0050684(regulation of mRNA processing)	NA	NA	NA
2	ENSDARG00000041887	sf3a1	0.638494	0.514155	0.312471	4.68114e-101	1.29724e-96	splicing factor 3a, subunit 1 [Source:ZFIN;Acc:ZDB-GENE-030616-156]	GO:0003723(RNA binding);GO:0005515(protein binding);GO:0005686(U2 snRNP);GO:0006396(RNA processing);GO:0071004(U2-type prespliceosome);GO:0071013(catalytic step 2 spliceosome)	03040(Spliceosome)	K12825	NA
2	ENSDARG00000036784	commd7	0.537945	0.442208	0.282734	5.47455e-101	1.51711e-96	COMM domain containing 7 [Source:ZFIN;Acc:ZDB-GENE-040801-96]	GO:0005575(cellular_component)	NA	K22563	NA
2	ENSDARG00000069850	mrpl30	0.835123	0.634672	0.395977	6.0785e-101	1.68447e-96	mitochondrial ribosomal protein L30 [Source:ZFIN;Acc:ZDB-GENE-050522-240]	GO:0003735(structural constituent of ribosome);GO:0005739(mitochondrion);GO:0006412(translation);GO:0015934(large ribosomal subunit)	03010(Ribosome)	K02907	NA
2	ENSDARG00000041974	brk1	0.622803	0.510434	0.287053	6.63246e-101	1.83799e-96	BRICK1, SCAR/WAVE actin-nucleating complex subunit [Source:ZFIN;Acc:ZDB-GENE-040625-77]	GO:0005737(cytoplasm);GO:0005856(cytoskeleton);GO:0007015(actin filament organization);GO:0008064(regulation of actin polymerization or depolymerization);GO:0031209(SCAR complex);GO:0044877(protein-containing complex binding);GO:0048870(cell motility)	04810(Regulation of actin cytoskeleton)	K05752	NA
2	ENSDARG00000008785	dldh	0.734894	0.588511	0.320466	7.02697e-101	1.94731e-96	dihydrolipoamide dehydrogenase [Source:ZFIN;Acc:ZDB-GENE-040120-4]	GO:0004148(dihydrolipoyl dehydrogenase activity);GO:0005623(cell);GO:0009055(electron transfer activity);GO:0016491(oxidoreductase activity);GO:0016668(oxidoreductase activity, acting on a sulfur group of donors, NAD(P) as acceptor);GO:0022900(electron transport chain);GO:0045454(cell redox homeostasis);GO:0050660(flavin adenine dinucleotide binding);GO:0055114(oxidation-reduction process);GO:006…	00010(Glycolysis / Gluconeogenesis);00020(Citrate cycle (TCA cycle));00260(Glycine, serine and threonine metabolism);00280(Valine, leucine and isoleucine degradation);00310(Lysine degradation);00380(Tryptophan metabolism);00620(Pyruvate metabolism);00630(Glyoxylate and dicarboxylate metabolism);00640(Propanoate metabolism)	K00382	EC:1.8.1.4
2	ENSDARG00000018890	snrpa	0.715194	0.550953	0.376405	7.69659e-101	2.13288e-96	small nuclear ribonucleoprotein polypeptide A [Source:ZFIN;Acc:ZDB-GENE-030131-2841]	GO:0000398(mRNA splicing, via spliceosome);GO:0003676(nucleic acid binding);GO:0003723(RNA binding);GO:0005685(U1 snRNP);GO:0030619(U1 snRNA binding);GO:0035614(snRNA stem-loop binding)	03040(Spliceosome)	K11091	NA
2	ENSDARG00000063100	psmd14	1.46294	0.942381	0.634492	7.82558e-101	2.16862e-96	proteasome 26S subunit, non-ATPase 14 [Source:ZFIN;Acc:ZDB-GENE-070410-56]	GO:0001878(response to yeast);GO:0004843(thiol-dependent ubiquitin-specific protease activity);GO:0005515(protein binding);GO:0005575(cellular_component);GO:0008237(metallopeptidase activity);GO:0008541(proteasome regulatory particle, lid subcomplex);GO:0016579(protein deubiquitination);GO:0043161(proteasome-mediated ubiquitin-dependent protein catabolic process);GO:0061578(Lys63-specific deubiqu…	03050(Proteasome)	K03030	NA
2	ENSDARG00000058203	smc1al	1.59419	1.11014	0.522078	9.00577e-101	2.49568e-96	structural maintenance of chromosomes 1A, like [Source:ZFIN;Acc:ZDB-GENE-040426-57]	GO:0003682(chromatin binding);GO:0005515(protein binding);GO:0005524(ATP binding);GO:0005634(nucleus);GO:0005694(chromosome);GO:0006281(DNA repair);GO:0007064(mitotic sister chromatid cohesion);GO:0008278(cohesin complex);GO:0016020(membrane);GO:0016021(integral component of membrane);GO:0048703(embryonic viscerocranium morphogenesis);GO:0051276(chromosome organization)	04110(Cell cycle);04114(Oocyte meiosis)	K06636	NA
2	ENSDARG00000011921	txnl1	0.802064	0.657682	0.286328	9.31374e-101	2.58102e-96	thioredoxin-like 1 [Source:ZFIN;Acc:ZDB-GENE-040426-701]	GO:0005623(cell);GO:0045454(cell redox homeostasis)	NA	NA	NA
2	ENSDARG00000052975	ubqln4	0.740281	0.587075	0.334527	9.93384e-101	2.75287e-96	ubiquilin 4 [Source:ZFIN;Acc:ZDB-GENE-030131-6269]	GO:0005515(protein binding);GO:0005829(cytosol);GO:0006511(ubiquitin-dependent protein catabolic process);GO:0031593(polyubiquitin modification-dependent protein binding);GO:0031597(cytosolic proteasome complex)	04141(Protein processing in endoplasmic reticulum)	K04523	NA
2	ENSDARG00000033789	ndufb7	1.64063	1.05712	0.634107	1.23028e-100	3.40936e-96	NADH:ubiquinone oxidoreductase subunit B7 [Source:ZFIN;Acc:ZDB-GENE-040426-1886]	GO:0003954(NADH dehydrogenase activity);GO:0005739(mitochondrion);GO:0008137(NADH dehydrogenase (ubiquinone) activity);GO:0055114(oxidation-reduction process)	00190(Oxidative phosphorylation)	K03963	NA
2	ENSDARG00000043732	cops4	0.644844	0.515112	0.324064	1.30501e-100	3.61644e-96	COP9 constitutive photomorphogenic homolog subunit 4 (Arabidopsis) [Source:ZFIN;Acc:ZDB-GENE-030131-4317]	GO:0005515(protein binding);GO:0005634(nucleus);GO:0005737(cytoplasm);GO:0005829(cytosol);GO:0006508(proteolysis);GO:0008021(synaptic vesicle);GO:0008180(COP9 signalosome);GO:0019784(NEDD8-specific protease activity);GO:0030054(cell junction);GO:0031410(cytoplasmic vesicle);GO:0045202(synapse)	NA	K12178	NA
2	ENSDARG00000056649	htatsf1	0.591253	0.470533	0.329481	2.13894e-100	5.92744e-96	HIV-1 Tat specific factor 1 [Source:ZFIN;Acc:ZDB-GENE-040426-1578]	GO:0000398(mRNA splicing, via spliceosome);GO:0003676(nucleic acid binding);GO:0003723(RNA binding);GO:0005684(U2-type spliceosomal complex);GO:0005686(U2 snRNP)	NA	K13093	NA
2	ENSDARG00000070019	taf15	1.77785	1.19691	0.570824	2.437e-100	6.75341e-96	TAF15 RNA polymerase II, TATA box binding protein (TBP)-associated factor [Source:ZFIN;Acc:ZDB-GENE-061215-102]	GO:0003676(nucleic acid binding);GO:0003723(RNA binding);GO:0005634(nucleus);GO:0006355(regulation of transcription, DNA-templated);GO:0046872(metal ion binding)	NA	K13098	NA
2	ENSDARG00000004774	wdr36	0.495994	0.399654	0.311572	2.57894e-100	7.14676e-96	WD repeat domain 36 [Source:ZFIN;Acc:ZDB-GENE-030131-464]	GO:0005515(protein binding);GO:0005730(nucleolus);GO:0005737(cytoplasm);GO:0006364(rRNA processing);GO:0032040(small-subunit processome);GO:0034388(Pwp2p-containing subcomplex of 90S preribosome)	03008(Ribosome biogenesis in eukaryotes)	K14554	NA
2	ENSDARG00000021112	c1d	0.480256	0.397314	0.273525	2.88162e-100	7.98556e-96	C1D nuclear receptor corepressor [Source:ZFIN;Acc:ZDB-GENE-041024-8]	NA	03018(RNA degradation)	K12592	NA
2	ENSDARG00000015990	hcfc1a	0.598729	0.470357	0.348146	3.38636e-100	9.38427e-96	host cell factor C1a [Source:ZFIN;Acc:ZDB-GENE-030912-10]	GO:0005515(protein binding);GO:0008150(biological_process);GO:0048188(Set1C/COMPASS complex);GO:0071339(MLL1 complex)	05168(Herpes simplex virus 1 infection)	K14966	NA
2	ENSDARG00000053138	lrrc47	0.563361	0.462075	0.285932	3.38751e-100	9.38746e-96	leucine rich repeat containing 47 [Source:ZFIN;Acc:ZDB-GENE-060503-289]	GO:0003723(RNA binding);GO:0004826(phenylalanine-tRNA ligase activity);GO:0005515(protein binding)	NA	NA	NA
2	ENSDARG00000069422	nhp2	1.44151	0.964191	0.58019	4.82485e-100	1.33706e-95	NHP2 ribonucleoprotein homolog (yeast) [Source:ZFIN;Acc:ZDB-GENE-030131-533]	GO:0000469(cleavage involved in rRNA processing);GO:0000470(maturation of LSU-rRNA);GO:0003723(RNA binding);GO:0005634(nucleus);GO:0005697(telomerase holoenzyme complex);GO:0005730(nucleolus);GO:0005732(small nucleolar ribonucleoprotein complex);GO:0006364(rRNA processing);GO:0007004(telomere maintenance via telomerase);GO:0031118(rRNA pseudouridine synthesis);GO:0031120(snRNA pseudouridine synth…	03008(Ribosome biogenesis in eukaryotes)	K11129	NA
2	ENSDARG00000056531	nutf2	0.468206	0.388399	0.269605	5.41717e-100	1.50121e-95	nuclear transport factor 2 [Source:ZFIN;Acc:ZDB-GENE-041010-77]	GO:0006606(protein import into nucleus);GO:0006913(nucleocytoplasmic transport);GO:0008565(protein transporter activity);GO:0044613(nuclear pore central transport channel)	NA	NA	NA
2	ENSDARG00000026476	tia1l	0.778473	0.636257	0.291037	6.06866e-100	1.68175e-95	cytotoxic granule-associated RNA binding protein 1, like [Source:ZFIN;Acc:ZDB-GENE-030131-2167]	GO:0003676(nucleic acid binding);GO:0003723(RNA binding)	NA	K13201	NA
2	ENSDARG00000057805	mrpl28	0.591598	0.463321	0.352606	6.85409e-100	1.89941e-95	mitochondrial ribosomal protein L28 [Source:ZFIN;Acc:ZDB-GENE-050522-113]	GO:0003735(structural constituent of ribosome);GO:0005762(mitochondrial large ribosomal subunit)	03010(Ribosome)	K02902	NA
2	ENSDARG00000093022	selenoh	1.18953	0.891418	0.416221	7.76064e-100	2.15063e-95	selenoprotein H [Source:ZFIN;Acc:ZDB-GENE-030411-2]	GO:0000775(chromosome, centromeric region);GO:0000776(kinetochore);GO:0000777(condensed chromosome kinetochore);GO:0000786(nucleosome);GO:0001889(liver development);GO:0003677(DNA binding);GO:0005634(nucleus);GO:0005694(chromosome);GO:0005737(cytoplasm);GO:0005794(Golgi apparatus);GO:0031016(pancreas development);GO:0031492(nucleosomal DNA binding);GO:0045454(cell redox homeostasis);GO:0046982(pr…	NA	K11495	NA
2	ENSDARG00000017049	adsl	0.640329	0.49859	0.360962	1.07884e-99	2.98969e-95	adenylosuccinate lyase [Source:ZFIN;Acc:ZDB-GENE-030131-6363]	GO:0003824(catalytic activity);GO:0004018(N6-(1,2-dicarboxyethyl)AMP AMP-lyase (fumarate-forming) activity);GO:0006164(purine nucleotide biosynthetic process);GO:0006189('de novo' IMP biosynthetic process);GO:0009152(purine ribonucleotide biosynthetic process);GO:0016020(membrane);GO:0016021(integral component of membrane);GO:0016829(lyase activity);GO:0044208('de novo' AMP biosynthetic process);…	00230(Purine metabolism);00250(Alanine, aspartate and glutamate metabolism)	K01756	EC:4.3.2.2
2	ENSDARG00000105116	p4hb	2.35214	1.40829	0.740025	1.11416e-99	3.08756e-95	prolyl 4-hydroxylase, beta polypeptide [Source:ZFIN;Acc:ZDB-GENE-080610-1]	GO:0003756(protein disulfide isomerase activity);GO:0005783(endoplasmic reticulum);GO:0006457(protein folding);GO:0016853(isomerase activity);GO:0034976(response to endoplasmic reticulum stress);GO:0045454(cell redox homeostasis)	04141(Protein processing in endoplasmic reticulum)	K09580	EC:5.3.4.1
2	ENSDARG00000103337	rrp1	1.08141	0.827465	0.386149	1.12971e-99	3.13066e-95	ribosomal RNA processing 1 [Source:ZFIN;Acc:ZDB-GENE-030131-9837]	GO:0005634(nucleus);GO:0006364(rRNA processing);GO:0030687(preribosome, large subunit precursor);GO:0030688(preribosome, small subunit precursor)	NA	K14849	NA
2	ENSDARG00000055708	timm8b	0.472997	0.381893	0.308664	1.28462e-99	3.55993e-95	translocase of inner mitochondrial membrane 8 homolog B (yeast) [Source:ZFIN;Acc:ZDB-GENE-031019-1]	GO:0005739(mitochondrion);GO:0005758(mitochondrial intermembrane space);GO:0015031(protein transport);GO:0046872(metal ion binding);GO:0072321(chaperone-mediated protein transport)	NA	K17780	NA
2	ENSDARG00000015392	dhx15	0.729782	0.573794	0.346932	1.3838e-99	3.83479e-95	DEAH (Asp-Glu-Ala-His) box helicase 15 [Source:ZFIN;Acc:ZDB-GENE-030131-650]	GO:0000166(nucleotide binding);GO:0003676(nucleic acid binding);GO:0003723(RNA binding);GO:0004386(helicase activity);GO:0005524(ATP binding);GO:0016787(hydrolase activity);GO:0034459(ATP-dependent 3'-5' RNA helicase activity)	03040(Spliceosome)	K12820	EC:3.6.4.13
2	ENSDARG00000030789	ddx18	1.1845	0.936713	0.3386	1.62374e-99	4.49972e-95	DEAD (Asp-Glu-Ala-Asp) box polypeptide 18 [Source:ZFIN;Acc:ZDB-GENE-030131-9685]	GO:0000166(nucleotide binding);GO:0003676(nucleic acid binding);GO:0003723(RNA binding);GO:0004386(helicase activity);GO:0005524(ATP binding);GO:0016787(hydrolase activity);GO:0030097(hemopoiesis);GO:0030099(myeloid cell differentiation)	NA	K13179	EC:3.6.4.13
2	ENSDARG00000017844	copz1	0.773138	0.641621	0.269004	2.24589e-99	6.22381e-95	coatomer protein complex, subunit zeta 1 [Source:ZFIN;Acc:ZDB-GENE-000406-6]	GO:0002088(lens development in camera-type eye);GO:0006886(intracellular protein transport);GO:0006890(retrograde vesicle-mediated transport, Golgi to endoplasmic reticulum);GO:0006891(intra-Golgi vesicle-mediated transport);GO:0016020(membrane);GO:0016192(vesicle-mediated transport);GO:0030117(membrane coat);GO:0030126(COPI vesicle coat)	NA	K20472	NA
2	ENSDARG00000007294	aco2	0.754156	0.558415	0.433525	2.50762e-99	6.94912e-95	aconitase 2, mitochondrial [Source:ZFIN;Acc:ZDB-GENE-030131-1390]	GO:0003994(aconitate hydratase activity);GO:0005739(mitochondrion);GO:0005829(cytosol);GO:0006099(tricarboxylic acid cycle);GO:0016829(lyase activity);GO:0046872(metal ion binding);GO:0051536(iron-sulfur cluster binding);GO:0051539(4 iron, 4 sulfur cluster binding)	00020(Citrate cycle (TCA cycle));00630(Glyoxylate and dicarboxylate metabolism)	K01681	EC:4.2.1.3
2	ENSDARG00000035167	mrpl48	0.397171	0.326472	0.282801	2.76954e-99	7.67496e-95	mitochondrial ribosomal protein L48 [Source:ZFIN;Acc:ZDB-GENE-041008-125]	GO:0005761(mitochondrial ribosome)	NA	K17429	NA
2	ENSDARG00000069099	tmco1	0.467143	0.374453	0.319081	2.83015e-99	7.8429e-95	transmembrane and coiled-coil domains 1 [Source:ZFIN;Acc:ZDB-GENE-050417-344]	GO:0000139(Golgi membrane);GO:0005262(calcium channel activity);GO:0005783(endoplasmic reticulum);GO:0005789(endoplasmic reticulum membrane);GO:0005794(Golgi apparatus);GO:0006811(ion transport);GO:0006816(calcium ion transport);GO:0006983(ER overload response);GO:0016020(membrane);GO:0016021(integral component of membrane);GO:0030176(integral component of endoplasmic reticulum membrane);GO:00324…	NA	K21891	NA
2	ENSDARG00000087555	si:ch73-308l14.2	0.741312	0.540971	0.454531	2.96209e-99	8.20854e-95	si:ch73-308l14.2 [Source:ZFIN;Acc:ZDB-GENE-141219-12]	GO:0005515(protein binding)	NA	NA	NA
2	ENSDARG00000058041	ndufa8	1.29641	0.922893	0.490289	3.01928e-99	8.36702e-95	NADH:ubiquinone oxidoreductase subunit A8 [Source:ZFIN;Acc:ZDB-GENE-040426-1688]	GO:0005739(mitochondrion);GO:0005743(mitochondrial inner membrane);GO:0005747(mitochondrial respiratory chain complex I);GO:0006120(mitochondrial electron transport, NADH to ubiquinone);GO:0016020(membrane);GO:0055114(oxidation-reduction process);GO:0070469(respirasome)	00190(Oxidative phosphorylation)	K03952	NA
2	ENSDARG00000040031	tardbp	1.36695	1.08632	0.331521	3.22926e-99	8.94893e-95	TAR DNA binding protein [Source:ZFIN;Acc:ZDB-GENE-030131-3777]	GO:0003676(nucleic acid binding);GO:0003690(double-stranded DNA binding);GO:0003723(RNA binding);GO:0003727(single-stranded RNA binding);GO:0003730(mRNA 3'-UTR binding);GO:0005654(nucleoplasm);GO:0005737(cytoplasm);GO:0007409(axonogenesis);GO:0007519(skeletal muscle tissue development);GO:0007626(locomotory behavior);GO:0048514(blood vessel morphogenesis);GO:0048675(axon extension);GO:0070935(3'-…	NA	NA	NA
2	ENSDARG00000100585	coa3a	0.51096	0.419912	0.283123	3.5297e-99	9.78151e-95	cytochrome C oxidase assembly factor 3a [Source:ZFIN;Acc:ZDB-GENE-060810-187]	GO:0016020(membrane);GO:0016021(integral component of membrane)	NA	K18175	NA
2	ENSDARG00000019941	sgta	0.670379	0.523408	0.357042	4.38697e-99	1.21572e-94	small glutamine-rich tetratricopeptide repeat (TPR)-containing, alpha [Source:ZFIN;Acc:ZDB-GENE-030131-8811]	GO:0005515(protein binding);GO:0008150(biological_process)	NA	K16365	NA
2	ENSDARG00000103027	clns1a	0.599005	0.488475	0.294284	4.42224e-99	1.22549e-94	chloride channel, nucleotide-sensitive, 1A [Source:ZFIN;Acc:ZDB-GENE-990415-259]	GO:0000387(spliceosomal snRNP assembly);GO:0005829(cytosol);GO:0005886(plasma membrane);GO:0006821(chloride transport);GO:0006884(cell volume homeostasis);GO:0034709(methylosome);GO:0034715(pICln-Sm protein complex);GO:0048675(axon extension)	03013(RNA transport)	K05019	NA
2	ENSDARG00000069013	prdx4	1.94344	1.27146	0.612129	4.45866e-99	1.23558e-94	peroxiredoxin 4 [Source:ZFIN;Acc:ZDB-GENE-030131-1096]	GO:0005783(endoplasmic reticulum);GO:0005829(cytosol);GO:0006979(response to oxidative stress);GO:0008379(thioredoxin peroxidase activity);GO:0016209(antioxidant activity);GO:0016491(oxidoreductase activity);GO:0042744(hydrogen peroxide catabolic process);GO:0045454(cell redox homeostasis);GO:0051920(peroxiredoxin activity);GO:0055114(oxidation-reduction process);GO:0098869(cellular oxidant detox…	NA	K03386	EC:1.11.1.15
2	ENSDARG00000067975	atp5if1a	3.62207	2.04186	0.826933	4.57516e-99	1.26787e-94	ATP synthase inhibitory factor subunit 1a [Source:ZFIN;Acc:ZDB-GENE-070410-36]	GO:0005739(mitochondrion);GO:0006783(heme biosynthetic process);GO:0007601(visual perception);GO:0007634(optokinetic behavior);GO:0030218(erythrocyte differentiation);GO:0032780(negative regulation of ATPase activity);GO:0042030(ATPase inhibitor activity);GO:0042803(protein homodimerization activity);GO:0051117(ATPase binding);GO:0051289(protein homotetramerization);GO:0051346(negative regulation…	NA	K22255	NA
2	ENSDARG00000037488	canx	1.82096	1.16615	0.642945	4.65019e-99	1.28866e-94	calnexin [Source:ZFIN;Acc:ZDB-GENE-040426-2797]	GO:0005509(calcium ion binding);GO:0005515(protein binding);GO:0005783(endoplasmic reticulum);GO:0006457(protein folding);GO:0016020(membrane);GO:0016021(integral component of membrane);GO:0048916(posterior lateral line development);GO:0051082(unfolded protein binding)	04141(Protein processing in endoplasmic reticulum);04145(Phagosome)	K08054	NA
2	ENSDARG00000029722	hmgb2a	18.9356	9.1764	1.0451	5.17226e-99	1.43334e-94	high mobility group box 2a [Source:ZFIN;Acc:ZDB-GENE-051120-126]	GO:0000790(nuclear chromatin);GO:0003677(DNA binding);GO:0005634(nucleus);GO:0005737(cytoplasm);GO:0006310(DNA recombination);GO:0006338(chromatin remodeling);GO:0006357(regulation of transcription by RNA polymerase II);GO:0008134(transcription factor binding);GO:0008301(DNA binding, bending);GO:0045089(positive regulation of innate immune response);GO:0045944(positive regulation of transcription…	NA	K11295	NA
2	ENSDARG00000011376	dnase1l4.2	1.19617	0.938577	0.349877	5.34224e-99	1.48044e-94	deoxyribonuclease 1 like 4, tandem duplicate 2 [Source:ZFIN;Acc:ZDB-GENE-040426-1884]	GO:0000737(DNA catabolic process, endonucleolytic);GO:0003677(DNA binding);GO:0004518(nuclease activity);GO:0004519(endonuclease activity);GO:0004530(deoxyribonuclease I activity);GO:0004536(deoxyribonuclease activity);GO:0005634(nucleus);GO:0006308(DNA catabolic process);GO:0016787(hydrolase activity)	NA	NA	NA
2	ENSDARG00000010717	chchd10	0.548836	0.427759	0.359577	5.83036e-99	1.61571e-94	coiled-coil-helix-coiled-coil-helix domain containing 10 [Source:ZFIN;Acc:ZDB-GENE-040426-1753]	GO:0005634(nucleus);GO:0005739(mitochondrion);GO:0007005(mitochondrion organization);GO:0007409(axonogenesis);GO:0014866(skeletal myofibril assembly)	NA	K22759	NA
2	ENSDARG00000038505	polr2h	0.483211	0.380981	0.342932	8.91259e-99	2.46986e-94	info polymerase (RNA) II (DNA directed) polypeptide H [Source:ZFIN;Acc:ZDB-GENE-050417-66]	GO:0001054(RNA polymerase I activity);GO:0001055(RNA polymerase II activity);GO:0001056(RNA polymerase III activity);GO:0005634(nucleus);GO:0005665(RNA polymerase II, core complex);GO:0005666(RNA polymerase III complex);GO:0005736(RNA polymerase I complex);GO:0006351(transcription, DNA-templated);GO:0006360(transcription by RNA polymerase I);GO:0006366(transcription by RNA polymerase II);GO:00063…	03020(RNA polymerase);04623(Cytosolic DNA-sensing pathway)	K03016	NA
2	ENSDARG00000033144	psme2	4.19832	2.36131	0.830224	1.32809e-98	3.6804e-94	proteasome activator subunit 2 [Source:ZFIN;Acc:ZDB-GENE-991110-16]	GO:0000502(proteasome complex);GO:0005654(nucleoplasm);GO:0005737(cytoplasm);GO:0008537(proteasome activator complex);GO:0010950(positive regulation of endopeptidase activity);GO:0061133(endopeptidase activator activity);GO:0061136(regulation of proteasomal protein catabolic process);GO:2000045(regulation of G1/S transition of mitotic cell cycle)	03050(Proteasome)	K06697	NA
2	ENSDARG00000037361	kdelr2b	0.911001	0.678085	0.425986	1.43548e-98	3.97799e-94	KDEL (Lys-Asp-Glu-Leu) endoplasmic reticulum protein retention receptor 2b [Source:ZFIN;Acc:ZDB-GENE-030131-4189]	GO:0005783(endoplasmic reticulum);GO:0005794(Golgi apparatus);GO:0005801(cis-Golgi network);GO:0006621(protein retention in ER lumen);GO:0006888(endoplasmic reticulum to Golgi vesicle-mediated transport);GO:0016020(membrane);GO:0016021(integral component of membrane);GO:0046923(ER retention sequence binding)	NA	K10949	NA
2	ENSDARG00000044431	ppig	1.04187	0.761594	0.452087	1.62608e-98	4.5062e-94	peptidylprolyl isomerase G (cyclophilin G) [Source:ZFIN;Acc:ZDB-GENE-040426-2822]	GO:0000413(protein peptidyl-prolyl isomerization);GO:0003755(peptidyl-prolyl cis-trans isomerase activity);GO:0006457(protein folding);GO:0016018(cyclosporin A binding);GO:0042026(protein refolding);GO:0051082(unfolded protein binding)	NA	K09566	EC:5.2.1.8
2	ENSDARG00000052190	fdx2	0.431245	0.358429	0.266822	2.07338e-98	5.74576e-94	ferredoxin 2 [Source:ZFIN;Acc:ZDB-GENE-060929-1046]	GO:0009055(electron transfer activity);GO:0022900(electron transport chain);GO:0051536(iron-sulfur cluster binding);GO:0051537(2 iron, 2 sulfur cluster binding)	NA	K22071	NA
2	ENSDARG00000023290	fabp3	3.36529	1.74064	0.951117	2.54112e-98	7.04194e-94	fatty acid binding protein 3, muscle and heart [Source:ZFIN;Acc:ZDB-GENE-020318-2]	GO:0001947(heart looping);GO:0007507(heart development);GO:0008289(lipid binding);GO:0043009(chordate embryonic development)	03320(PPAR signaling pathway)	K08752	NA
2	ENSDARG00000097753	slirp	1.17428	0.820001	0.518084	2.54141e-98	7.04277e-94	SRA stem-loop interacting RNA binding protein [Source:ZFIN;Acc:ZDB-GENE-030729-30]	GO:0000961(negative regulation of mitochondrial RNA catabolic process);GO:0003676(nucleic acid binding);GO:0003723(RNA binding);GO:0005739(mitochondrion);GO:0070584(mitochondrion morphogenesis);GO:1990904(ribonucleoprotein complex)	NA	NA	NA
2	ENSDARG00000061228	pfdn4	2.14187	1.40026	0.61317	2.66064e-98	7.37318e-94	prefoldin subunit 4 [Source:ZFIN;Acc:ZDB-GENE-100922-122]	GO:0005737(cytoplasm);GO:0006457(protein folding);GO:0016272(prefoldin complex);GO:0051082(unfolded protein binding)	NA	K09550	NA
2	ENSDARG00000017781	hsd17b10	0.65699	0.495893	0.405844	2.95131e-98	8.17866e-94	hydroxysteroid (17-beta) dehydrogenase 10 [Source:ZFIN;Acc:ZDB-GENE-041010-201]	GO:0005575(cellular_component);GO:0016491(oxidoreductase activity);GO:0055114(oxidation-reduction process)	00280(Valine, leucine and isoleucine degradation)	K08683	1.1.1.178;EC:1.1.1.35
2	ENSDARG00000068820	h2afva	1.49917	1.04516	0.520434	3.00432e-98	8.32557e-94	H2A histone family, member Va [Source:ZFIN;Acc:ZDB-GENE-020717-1]	GO:0000786(nucleosome);GO:0000790(nuclear chromatin);GO:0003677(DNA binding);GO:0005634(nucleus);GO:0005694(chromosome);GO:0006325(chromatin organization);GO:0046982(protein heterodimerization activity)	04217(Necroptosis)	K11251	NA
2	ENSDARG00000016484	dkc1	2.4622	1.70263	0.532185	3.62334e-98	1.0041e-93	dyskeratosis congenita 1, dyskerin [Source:ZFIN;Acc:ZDB-GENE-031118-120]	GO:0000495(box H/ACA snoRNA 3'-end processing);GO:0001522(pseudouridine synthesis);GO:0003723(RNA binding);GO:0006364(rRNA processing);GO:0006396(RNA processing);GO:0009451(RNA modification);GO:0009982(pseudouridine synthase activity);GO:0031118(rRNA pseudouridine synthesis);GO:0031120(snRNA pseudouridine synthesis);GO:0031429(box H/ACA snoRNP complex);GO:0060216(definitive hemopoiesis);GO:199048…	03008(Ribosome biogenesis in eukaryotes)	K11131	EC:5.4.99.-
2	ENSDARG00000016630	tprb	0.615962	0.507685	0.278906	4.11154e-98	1.13939e-93	translocated promoter region b, nuclear basket protein [Source:ZFIN;Acc:ZDB-GENE-030131-6410]	GO:0005643(nuclear pore);GO:0006606(protein import into nucleus);GO:0007094(mitotic spindle assembly checkpoint);GO:0017056(structural constituent of nuclear pore)	03013(RNA transport)	K09291	NA
2	ENSDARG00000038608	sdhc	0.792035	0.626735	0.337709	4.19675e-98	1.163e-93	succinate dehydrogenase complex, subunit C, integral membrane protein [Source:ZFIN;Acc:ZDB-GENE-040801-26]	GO:0000104(succinate dehydrogenase activity);GO:0005739(mitochondrion);GO:0005749(mitochondrial respiratory chain complex II, succinate dehydrogenase complex (ubiquinone));GO:0006099(tricarboxylic acid cycle);GO:0006121(mitochondrial electron transport, succinate to ubiquinone);GO:0008177(succinate dehydrogenase (ubiquinone) activity);GO:0009055(electron transfer activity);GO:0009060(aerobic resp…	00020(Citrate cycle (TCA cycle));00190(Oxidative phosphorylation)	K00236	NA
2	ENSDARG00000044753	idh3b	0.426497	0.356142	0.260084	5.40383e-98	1.49751e-93	isocitrate dehydrogenase 3 (NAD+) beta [Source:ZFIN;Acc:ZDB-GENE-040625-174]	GO:0000287(magnesium ion binding);GO:0004449(isocitrate dehydrogenase (NAD+) activity);GO:0005739(mitochondrion);GO:0006099(tricarboxylic acid cycle);GO:0016616(oxidoreductase activity, acting on the CH-OH group of donors, NAD or NADP as acceptor);GO:0051287(NAD binding);GO:0055114(oxidation-reduction process)	00020(Citrate cycle (TCA cycle))	K00030	EC:1.1.1.41
2	ENSDARG00000003035	hspa9	1.04169	0.865802	0.266817	5.47217e-98	1.51645e-93	heat shock protein 9 [Source:ZFIN;Acc:ZDB-GENE-030828-12]	GO:0000166(nucleotide binding);GO:0005524(ATP binding);GO:0005737(cytoplasm);GO:0005739(mitochondrion);GO:0005759(mitochondrial matrix);GO:0006457(protein folding);GO:0006986(response to unfolded protein);GO:0016887(ATPase activity);GO:0030097(hemopoiesis);GO:0031072(heat shock protein binding);GO:0031101(fin regeneration);GO:0034605(cellular response to heat);GO:0034620(cellular response to unfo…	03018(RNA degradation)	K04043	NA
2	ENSDARG00000044601	rtn4a	1.61961	1.25457	0.368452	5.9235e-98	1.64152e-93	reticulon 4a [Source:ZFIN;Acc:ZDB-GENE-030710-1]	GO:0002040(sprouting angiogenesis);GO:0005515(protein binding);GO:0005783(endoplasmic reticulum);GO:0005789(endoplasmic reticulum membrane);GO:0007409(axonogenesis);GO:0007411(axon guidance);GO:0007420(brain development);GO:0016020(membrane);GO:0016021(integral component of membrane);GO:0021554(optic nerve development);GO:0043010(camera-type eye development);GO:0048884(neuromast development);GO:0…	NA	K20720	NA
2	ENSDARG00000043857	ufm1	1.27469	0.927652	0.458495	6.07012e-98	1.68215e-93	ubiquitin-fold modifier 1 [Source:ZFIN;Acc:ZDB-GENE-040426-2930]	NA	NA	K12162	NA
2	ENSDARG00000024478	mpc2	0.605135	0.485168	0.318773	6.4365e-98	1.78368e-93	mitochondrial pyruvate carrier 2 [Source:ZFIN;Acc:ZDB-GENE-030131-330]	GO:0005739(mitochondrion);GO:0005743(mitochondrial inner membrane);GO:0006850(mitochondrial pyruvate transmembrane transport);GO:0031305(integral component of mitochondrial inner membrane);GO:0050833(pyruvate transmembrane transporter activity)	NA	K22139	NA
2	ENSDARG00000091280	si:ch211-66k16.27	0.919237	0.70503	0.382753	6.74924e-98	1.87035e-93	si:ch211-66k16.27 [Source:ZFIN;Acc:ZDB-GENE-120709-9]	GO:0004197(cysteine-type endopeptidase activity);GO:0006508(proteolysis);GO:0006954(inflammatory response);GO:0042981(regulation of apoptotic process);GO:0045087(innate immune response)	NA	NA	NA
2	ENSDARG00000041400	ndufa3	0.746562	0.575189	0.376226	7.27028e-98	2.01474e-93	NADH:ubiquinone oxidoreductase subunit A3 [Source:ZFIN;Acc:ZDB-GENE-040801-18]	GO:0003674(molecular_function);GO:0005743(mitochondrial inner membrane);GO:0005747(mitochondrial respiratory chain complex I);GO:0008150(biological_process);GO:0016020(membrane);GO:0016021(integral component of membrane)	00190(Oxidative phosphorylation)	K03947	NA
2	ENSDARG00000018902	pes	1.17042	0.821799	0.510164	7.82475e-98	2.1684e-93	pescadillo [Source:ZFIN;Acc:ZDB-GENE-990415-206]	GO:0000463(maturation of LSU-rRNA from tricistronic rRNA transcript (SSU-rRNA, 5.8S rRNA, LSU-rRNA));GO:0000466(maturation of 5.8S rRNA from tricistronic rRNA transcript (SSU-rRNA, 5.8S rRNA, LSU-rRNA));GO:0005634(nucleus);GO:0005654(nucleoplasm);GO:0005730(nucleolus);GO:0006364(rRNA processing);GO:0008283(cell population proliferation);GO:0030687(preribosome, large subunit precursor);GO:0031017(…	NA	K14843	NA
2	ENSDARG00000070607	mrpl36	0.99277	0.782352	0.343641	1.19832e-97	3.32078e-93	mitochondrial ribosomal protein L36 [Source:ZFIN;Acc:ZDB-GENE-060503-821]	GO:0003735(structural constituent of ribosome);GO:0005622(intracellular);GO:0005739(mitochondrion);GO:0005762(mitochondrial large ribosomal subunit);GO:0005840(ribosome);GO:0006412(translation);GO:0042254(ribosome biogenesis)	03010(Ribosome)	K02919	NA
2	ENSDARG00000087897	h2afy2	0.818264	0.673572	0.280735	1.29233e-97	3.5813e-93	H2A histone family, member Y2 [Source:ZFIN;Acc:ZDB-GENE-050913-114]	GO:0000786(nucleosome);GO:0000790(nuclear chromatin);GO:0003677(DNA binding);GO:0005634(nucleus);GO:0005694(chromosome);GO:0006325(chromatin organization);GO:0006334(nucleosome assembly);GO:0007420(brain development);GO:0031490(chromatin DNA binding);GO:0044212(transcription regulatory region DNA binding);GO:0046982(protein heterodimerization activity)	04217(Necroptosis)	K11251	NA
2	ENSDARG00000115266	imp3	0.394792	0.326041	0.276042	1.40793e-97	3.90164e-93	IMP3, U3 small nucleolar ribonucleoprotein, homolog (yeast) [Source:ZFIN;Acc:ZDB-GENE-040426-1062]	GO:0003723(RNA binding);GO:0005622(intracellular);GO:0006364(rRNA processing);GO:0019843(rRNA binding);GO:0030515(snoRNA binding);GO:0032040(small-subunit processome);GO:0034457(Mpp10 complex)	03008(Ribosome biogenesis in eukaryotes)	K14560	NA
2	ENSDARG00000103919	si:ch73-1a9.3	7.61965	3.97294	0.939519	1.98425e-97	5.49876e-93	si:ch73-1a9.3 [Source:ZFIN;Acc:ZDB-GENE-141216-84]	GO:0000785(chromatin);GO:0005634(nucleus);GO:0031492(nucleosomal DNA binding)	NA	NA	NA
2	ENSDARG00000057738	hells	0.713186	0.507249	0.491583	2.08474e-97	5.77724e-93	helicase, lymphoid specific [Source:ZFIN;Acc:ZDB-GENE-030131-9923]	GO:0004386(helicase activity);GO:0005524(ATP binding);GO:0044030(regulation of DNA methylation)	NA	K19001	NA
2	ENSDARG00000012603	eif3ja	1.14676	0.865727	0.40558	2.10958e-97	5.84606e-93	eukaryotic translation initiation factor 3, subunit Ja [Source:ZFIN;Acc:ZDB-GENE-040426-1266]	GO:0001732(formation of cytoplasmic translation initiation complex);GO:0002183(cytoplasmic translational initiation);GO:0003743(translation initiation factor activity);GO:0005737(cytoplasm);GO:0005852(eukaryotic translation initiation factor 3 complex);GO:0006412(translation);GO:0006413(translational initiation);GO:0016282(eukaryotic 43S preinitiation complex);GO:0033290(eukaryotic 48S preinitiat…	03013(RNA transport)	K03245	NA
2	ENSDARG00000023279	psmd4b	0.706699	0.529806	0.415632	2.22154e-97	6.15632e-93	proteasome 26S subunit, non-ATPase 4b [Source:ZFIN;Acc:ZDB-GENE-050417-96]	GO:0000502(proteasome complex);GO:0005634(nucleus);GO:0005829(cytosol);GO:0008540(proteasome regulatory particle, base subcomplex);GO:0031593(polyubiquitin modification-dependent protein binding);GO:0043161(proteasome-mediated ubiquitin-dependent protein catabolic process);GO:0043248(proteasome assembly)	03050(Proteasome)	K03029	NA
2	ENSDARG00000039887	c1qbp	2.96289	1.72427	0.781018	2.35006e-97	6.51247e-93	complement component 1, q subcomponent binding protein [Source:ZFIN;Acc:ZDB-GENE-050417-408]	GO:0003674(molecular_function);GO:0003729(mRNA binding);GO:0005739(mitochondrion);GO:0005759(mitochondrial matrix);GO:0008150(biological_process);GO:0008494(translation activator activity);GO:0070131(positive regulation of mitochondrial translation);GO:0097177(mitochondrial ribosome binding)	NA	K15414	NA
2	ENSDARG00000042777	ndufa11	0.704552	0.55948	0.332621	2.47767e-97	6.86612e-93	NADH:ubiquinone oxidoreductase subunit A11 [Source:ZFIN;Acc:ZDB-GENE-040426-1631]	GO:0005747(mitochondrial respiratory chain complex I);GO:0032981(mitochondrial respiratory chain complex I assembly)	00190(Oxidative phosphorylation)	K03956	NA
2	ENSDARG00000058088	aifm1	0.460865	0.37656	0.291465	2.57498e-97	7.13579e-93	apoptosis-inducing factor, mitochondrion-associated 1 [Source:ZFIN;Acc:ZDB-GENE-030826-11]	GO:0016020(membrane);GO:0016021(integral component of membrane);GO:0016491(oxidoreductase activity);GO:0046983(protein dimerization activity);GO:0050660(flavin adenine dinucleotide binding);GO:0055114(oxidation-reduction process)	04210(Apoptosis);04217(Necroptosis)	K04727	EC:1.-.-.-
2	ENSDARG00000040666	nifk	0.890065	0.720065	0.305783	3.78403e-97	1.04863e-92	nucleolar protein interacting with the FHA domain of MKI67 [Source:ZFIN;Acc:ZDB-GENE-021231-4]	GO:0003676(nucleic acid binding);GO:0003723(RNA binding);GO:0005634(nucleus);GO:0005730(nucleolus);GO:0007275(multicellular organism development)	NA	K14838	NA
2	ENSDARG00000039880	arpp19b	0.605353	0.474042	0.352763	4.19862e-97	1.16352e-92	cAMP-regulated phosphoprotein 19b [Source:ZFIN;Acc:ZDB-GENE-040426-930]	GO:0004864(protein phosphatase inhibitor activity);GO:0005737(cytoplasm);GO:0007049(cell cycle);GO:0032515(negative regulation of phosphoprotein phosphatase activity);GO:0035308(negative regulation of protein dephosphorylation);GO:0051301(cell division)	NA	NA	NA
2	ENSDARG00000098825	farsa	0.838273	0.660055	0.344835	5.27407e-97	1.46155e-92	phenylalanyl-tRNA synthetase subunit alpha [Source:ZFIN;Acc:ZDB-GENE-050512-2]	GO:0000049(tRNA binding);GO:0000166(nucleotide binding);GO:0004812(aminoacyl-tRNA ligase activity);GO:0004826(phenylalanine-tRNA ligase activity);GO:0005524(ATP binding);GO:0005737(cytoplasm);GO:0005829(cytosol);GO:0006412(translation);GO:0006432(phenylalanyl-tRNA aminoacylation);GO:0009328(phenylalanine-tRNA ligase complex);GO:0016874(ligase activity);GO:0043039(tRNA aminoacylation);GO:0051290(p…	00970(Aminoacyl-tRNA biosynthesis)	K01889	EC:6.1.1.20
2	ENSDARG00000019444	ssr4	6.75356	3.3255	1.02208	6.07301e-97	1.68295e-92	signal sequence receptor, delta [Source:ZFIN;Acc:ZDB-GENE-030131-4900]	GO:0005783(endoplasmic reticulum);GO:0016020(membrane);GO:0016021(integral component of membrane);GO:0071391(cellular response to estrogen stimulus)	04141(Protein processing in endoplasmic reticulum)	K04571	NA
2	ENSDARG00000019000	smc3	0.811337	0.654808	0.309228	6.76943e-97	1.87594e-92	structural maintenance of chromosomes 3 [Source:ZFIN;Acc:ZDB-GENE-030131-3196]	GO:0005515(protein binding);GO:0005524(ATP binding);GO:0005634(nucleus);GO:0005694(chromosome);GO:0006357(regulation of transcription by RNA polymerase II);GO:0007064(mitotic sister chromatid cohesion);GO:0051276(chromosome organization)	04110(Cell cycle);04114(Oocyte meiosis)	K06669	NA
2	ENSDARG00000002165	psme1	3.47011	1.99664	0.797405	1.01852e-96	2.82252e-92	proteasome activator subunit 1 [Source:ZFIN;Acc:ZDB-GENE-991110-17]	GO:0000502(proteasome complex);GO:0005654(nucleoplasm);GO:0005737(cytoplasm);GO:0008537(proteasome activator complex);GO:0010950(positive regulation of endopeptidase activity);GO:0061133(endopeptidase activator activity);GO:0061136(regulation of proteasomal protein catabolic process);GO:2000045(regulation of G1/S transition of mitotic cell cycle)	03050(Proteasome)	K06696	NA
2	ENSDARG00000045146	tomm22	0.770708	0.570403	0.434202	1.02818e-96	2.84928e-92	translocase of outer mitochondrial membrane 22 homolog (yeast) [Source:ZFIN;Acc:ZDB-GENE-030131-9810]	GO:0001889(liver development);GO:0005741(mitochondrial outer membrane);GO:0006886(intracellular protein transport)	NA	K17769	NA
2	ENSDARG00000003938	rpa1	0.822535	0.62259	0.401795	1.13855e-96	3.15516e-92	replication protein A1 [Source:ZFIN;Acc:ZDB-GENE-030912-3]	GO:0000723(telomere maintenance);GO:0000724(double-strand break repair via homologous recombination);GO:0000784(nuclear chromosome, telomeric region);GO:0003676(nucleic acid binding);GO:0003677(DNA binding);GO:0003684(damaged DNA binding);GO:0003697(single-stranded DNA binding);GO:0005634(nucleus);GO:0005662(DNA replication factor A complex);GO:0006260(DNA replication);GO:0006261(DNA-dependent DN…	03030(DNA replication);03420(Nucleotide excision repair);03430(Mismatch repair);03440(Homologous recombination);03460(Fanconi anemia pathway)	K07466	NA
2	ENSDARG00000005827	eif2s1a	0.897232	0.680666	0.398533	1.32061e-96	3.65966e-92	eukaryotic translation initiation factor 2, subunit 1 alpha a [Source:ZFIN;Acc:ZDB-GENE-030131-526]	GO:0003676(nucleic acid binding);GO:0003723(RNA binding);GO:0003743(translation initiation factor activity);GO:0005737(cytoplasm);GO:0005850(eukaryotic translation initiation factor 2 complex);GO:0005851(eukaryotic translation initiation factor 2B complex);GO:0006413(translational initiation);GO:0033290(eukaryotic 48S preinitiation complex);GO:0043022(ribosome binding);GO:0043614(multi-eIF comple…	NA	NA	NA
2	ENSDARG00000102978	eif4a3	1.39387	1.0422	0.419468	1.44658e-96	4.00876e-92	eukaryotic translation initiation factor 4A3 [Source:ZFIN;Acc:ZDB-GENE-040426-915]	GO:0000166(nucleotide binding);GO:0003676(nucleic acid binding);GO:0004386(helicase activity);GO:0005524(ATP binding);GO:0016787(hydrolase activity)	03013(RNA transport);03015(mRNA surveillance pathway);03040(Spliceosome)	K13025	EC:3.6.4.13
2	ENSDARG00000011740	u2af2b	1.8643	1.31335	0.505382	1.95187e-96	5.40903e-92	U2 small nuclear RNA auxiliary factor 2b [Source:ZFIN;Acc:ZDB-GENE-040426-1881]	GO:0000243(commitment complex);GO:0003676(nucleic acid binding);GO:0003723(RNA binding);GO:0005634(nucleus);GO:0006397(mRNA processing);GO:0008187(poly-pyrimidine tract binding);GO:0008380(RNA splicing);GO:0016607(nuclear speck);GO:0030628(pre-mRNA 3'-splice site binding);GO:0071004(U2-type prespliceosome);GO:0089701(U2AF)	03040(Spliceosome)	K12837	NA
2	ENSDARG00000026842	acin1b	1.15494	0.890905	0.374473	2.58481e-96	7.16302e-92	apoptotic chromatin condensation inducer 1b [Source:ZFIN;Acc:ZDB-GENE-030826-12]	GO:0003676(nucleic acid binding)	03013(RNA transport);03015(mRNA surveillance pathway);03040(Spliceosome)	K12875	NA
2	ENSDARG00000102832	baz1b	1.61485	1.196	0.433184	2.69216e-96	7.46051e-92	bromodomain adjacent to zinc finger domain, 1B [Source:ZFIN;Acc:ZDB-GENE-010328-16]	GO:0004713(protein tyrosine kinase activity);GO:0005515(protein binding);GO:0005634(nucleus);GO:0006338(chromatin remodeling);GO:0018108(peptidyl-tyrosine phosphorylation);GO:0046872(metal ion binding)	NA	K11658	NA
2	ENSDARG00000038456	mrps35	0.48766	0.392934	0.311588	2.88004e-96	7.98118e-92	mitochondrial ribosomal protein S35 [Source:ZFIN;Acc:ZDB-GENE-050809-131]	GO:0003735(structural constituent of ribosome);GO:0005739(mitochondrion);GO:0032543(mitochondrial translation)	NA	K17413	NA
2	ENSDARG00000036329	ndufa1	1.10515	0.870274	0.344703	2.90705e-96	8.05602e-92	NADH:ubiquinone oxidoreductase subunit A1 [Source:ZFIN;Acc:ZDB-GENE-040625-168]	GO:0003674(molecular_function);GO:0008150(biological_process)	00190(Oxidative phosphorylation)	K03945	NA
2	ENSDARG00000006019	tktb	1.48153	1.15479	0.359453	2.98527e-96	8.27277e-92	transketolase b [Source:ZFIN;Acc:ZDB-GENE-030909-13]	GO:0003824(catalytic activity)	00030(Pentose phosphate pathway)	K00615	EC:2.2.1.1
2	ENSDARG00000111714	BOLA2	0.484376	0.387732	0.321067	3.00911e-96	8.33886e-92	zgc:112271 [Source:ZFIN;Acc:ZDB-GENE-050522-443]	GO:0005575(cellular_component);GO:0008150(biological_process)	NA	NA	NA
2	ENSDARG00000037654	pmm2	0.525624	0.434965	0.273132	3.17883e-96	8.80918e-92	phosphomannomutase 2 [Source:ZFIN;Acc:ZDB-GENE-030722-6]	GO:0004615(phosphomannomutase activity);GO:0005737(cytoplasm);GO:0005829(cytosol);GO:0006013(mannose metabolic process);GO:0006487(protein N-linked glycosylation);GO:0009298(GDP-mannose biosynthetic process);GO:0016853(isomerase activity);GO:0022008(neurogenesis);GO:0045047(protein targeting to ER);GO:0048701(embryonic cranial skeleton morphogenesis);GO:0090171(chondrocyte morphogenesis)	00051(Fructose and mannose metabolism);00520(Amino sugar and nucleotide sugar metabolism)	K17497	EC:5.4.2.8
2	ENSDARG00000007955	iars	0.560227	0.447173	0.325179	4.0144e-96	1.11247e-91	isoleucyl-tRNA synthetase [Source:ZFIN;Acc:ZDB-GENE-030131-6325]	GO:0000049(tRNA binding);GO:0000166(nucleotide binding);GO:0002161(aminoacyl-tRNA editing activity);GO:0004812(aminoacyl-tRNA ligase activity);GO:0004822(isoleucine-tRNA ligase activity);GO:0005524(ATP binding);GO:0006412(translation);GO:0006418(tRNA aminoacylation for protein translation);GO:0006428(isoleucyl-tRNA aminoacylation);GO:0016874(ligase activity);GO:0106074(aminoacyl-tRNA metabolism i…	00970(Aminoacyl-tRNA biosynthesis)	K01870	EC:6.1.1.5
2	ENSDARG00000016280	eif1ad	0.765042	0.623457	0.295248	4.12316e-96	1.14261e-91	eukaryotic translation initiation factor 1A domain containing [Source:ZFIN;Acc:ZDB-GENE-040426-1199]	GO:0003723(RNA binding);GO:0003743(translation initiation factor activity);GO:0006412(translation);GO:0006413(translational initiation)	NA	K15025	NA
2	ENSDARG00000078214	mybbp1a	1.30268	0.889627	0.550205	4.28297e-96	1.1869e-91	MYB binding protein (P160) 1a [Source:ZFIN;Acc:ZDB-GENE-030131-9864]	GO:0003677(DNA binding);GO:0005730(nucleolus);GO:0006355(regulation of transcription, DNA-templated);GO:0008134(transcription factor binding)	NA	K02331	EC:2.7.7.7
2	ENSDARG00000062568	mrpl2	0.653731	0.536957	0.283892	4.38739e-96	1.21583e-91	mitochondrial ribosomal protein L2 [Source:ZFIN;Acc:ZDB-GENE-050809-12]	GO:0003735(structural constituent of ribosome);GO:0005762(mitochondrial large ribosomal subunit);GO:0005840(ribosome);GO:0006412(translation);GO:0032543(mitochondrial translation)	03010(Ribosome)	K02886	NA
2	ENSDARG00000054804	anp32e	1.25237	0.971635	0.366171	4.94076e-96	1.36918e-91	acidic (leucine-rich) nuclear phosphoprotein 32 family, member E [Source:ZFIN;Acc:ZDB-GENE-040426-2448]	GO:0000812(Swr1 complex);GO:0005515(protein binding);GO:0005634(nucleus);GO:0005737(cytoplasm);GO:0006325(chromatin organization);GO:0042393(histone binding);GO:0043486(histone exchange)	NA	K18648	NA
2	ENSDARG00000092954	mrpl34	0.66013	0.506723	0.381553	5.93181e-96	1.64382e-91	mitochondrial ribosomal protein L34 [Source:ZFIN;Acc:ZDB-GENE-070912-582]	GO:0003735(structural constituent of ribosome);GO:0005622(intracellular);GO:0005762(mitochondrial large ribosomal subunit);GO:0005840(ribosome);GO:0006412(translation)	03010(Ribosome)	K02914	NA
2	ENSDARG00000076486	acp1	0.536424	0.433373	0.307766	6.21819e-96	1.72318e-91	acid phosphatase 1 [Source:ZFIN;Acc:ZDB-GENE-050327-12]	GO:0003993(acid phosphatase activity);GO:0004725(protein tyrosine phosphatase activity);GO:0004726(non-membrane spanning protein tyrosine phosphatase activity);GO:0005737(cytoplasm);GO:0006470(protein dephosphorylation);GO:0035335(peptidyl-tyrosine dephosphorylation);GO:0048793(pronephros development)	00730(Thiamine metabolism);00740(Riboflavin metabolism)	K14394	3.1.3.48;EC:3.1.3.2
2	ENSDARG00000020008	vcp	2.87189	1.70516	0.752089	7.74777e-96	2.14706e-91	valosin containing protein [Source:ZFIN;Acc:ZDB-GENE-030131-5408]	GO:0000166(nucleotide binding);GO:0005524(ATP binding);GO:0005634(nucleus);GO:0005737(cytoplasm);GO:0005783(endoplasmic reticulum);GO:0005829(cytosol);GO:0006281(DNA repair);GO:0006302(double-strand break repair);GO:0006914(autophagy);GO:0006974(cellular response to DNA damage stimulus);GO:0007049(cell cycle);GO:0007626(locomotory behavior);GO:0008289(lipid binding);GO:0016236(macroautophagy);GO:…	04141(Protein processing in endoplasmic reticulum)	K13525	NA
2	ENSDARG00000012871	npepl1	0.974248	0.752889	0.371851	8.16626e-96	2.26303e-91	aminopeptidase like 1 [Source:ZFIN;Acc:ZDB-GENE-050417-177]	GO:0004177(aminopeptidase activity);GO:0005622(intracellular);GO:0005737(cytoplasm);GO:0006508(proteolysis);GO:0008235(metalloexopeptidase activity);GO:0019538(protein metabolic process);GO:0030145(manganese ion binding)	NA	K09611	EC:3.4.11.-
2	ENSDARG00000036164	cars	0.702189	0.524627	0.420568	8.66217e-96	2.40046e-91	cysteinyl-tRNA synthetase [Source:ZFIN;Acc:ZDB-GENE-030328-29]	GO:0000166(nucleotide binding);GO:0004812(aminoacyl-tRNA ligase activity);GO:0004817(cysteine-tRNA ligase activity);GO:0005524(ATP binding);GO:0005737(cytoplasm);GO:0006418(tRNA aminoacylation for protein translation);GO:0006423(cysteinyl-tRNA aminoacylation)	00970(Aminoacyl-tRNA biosynthesis)	K01883	EC:6.1.1.16
2	ENSDARG00000100209	prpf39	0.988349	0.788751	0.325451	1.0642e-95	2.94912e-91	PRP39 pre-mRNA processing factor 39 homolog (yeast) [Source:ZFIN;Acc:ZDB-GENE-030616-420]	GO:0000243(commitment complex);GO:0000395(mRNA 5'-splice site recognition);GO:0005515(protein binding);GO:0005634(nucleus);GO:0005685(U1 snRNP);GO:0006396(RNA processing);GO:0006397(mRNA processing);GO:0008380(RNA splicing);GO:0030627(pre-mRNA 5'-splice site binding);GO:0071004(U2-type prespliceosome)	NA	K13217	NA
2	ENSDARG00000099309	si:zfos-169g10.3	0.438885	0.363241	0.272914	1.07018e-95	2.96569e-91	si:zfos-169g10.3 [Source:ZFIN;Acc:ZDB-GENE-120215-190]	GO:0005507(copper ion binding);GO:0010038(response to metal ion)	NA	NA	NA
2	ENSDARG00000026369	dbi	2.93355	1.78983	0.712823	1.148e-95	3.18134e-91	diazepam binding inhibitor (GABA receptor modulator, acyl-CoA binding protein) [Source:ZFIN;Acc:ZDB-GENE-040426-1861]	GO:0000062(fatty-acyl-CoA binding);GO:0005575(cellular_component);GO:0008150(biological_process)	03320(PPAR signaling pathway)	K08762	NA
2	ENSDARG00000015889	zc3h15	0.600681	0.493222	0.284361	1.16324e-95	3.22356e-91	zinc finger CCCH-type containing 15 [Source:ZFIN;Acc:ZDB-GENE-030131-6239]	GO:0046872(metal ion binding)	NA	NA	NA
2	ENSDARG00000103553	sf3b3	0.735748	0.588841	0.321332	1.32117e-95	3.66122e-91	splicing factor 3b, subunit 3 [Source:ZFIN;Acc:ZDB-GENE-040426-2901]	GO:0000398(mRNA splicing, via spliceosome);GO:0003676(nucleic acid binding);GO:0005515(protein binding);GO:0005634(nucleus);GO:0005681(spliceosomal complex);GO:0006397(mRNA processing);GO:0008380(RNA splicing);GO:0071005(U2-type precatalytic spliceosome)	03040(Spliceosome)	K12830	NA
2	ENSDARG00000012399	adssl	0.9298	0.733466	0.342191	1.48697e-95	4.1207e-91	adenylosuccinate synthase, like [Source:ZFIN;Acc:ZDB-GENE-020419-28]	GO:0000166(nucleotide binding);GO:0000287(magnesium ion binding);GO:0004019(adenylosuccinate synthase activity);GO:0005525(GTP binding);GO:0005737(cytoplasm);GO:0006164(purine nucleotide biosynthetic process);GO:0006167(AMP biosynthetic process);GO:0016874(ligase activity);GO:0044208('de novo' AMP biosynthetic process);GO:0046040(IMP metabolic process);GO:0046872(metal ion binding)	00230(Purine metabolism);00250(Alanine, aspartate and glutamate metabolism)	K01939	EC:6.3.4.4
2	ENSDARG00000095921	si:ch1073-325m22.2	2.58531	1.56477	0.724381	1.68272e-95	4.66316e-91	si:ch1073-325m22.2 [Source:NCBI gene;Acc:100333135]	NA	00190(Oxidative phosphorylation);04260(Cardiac muscle contraction)	K00420	NA
2	ENSDARG00000100742	reep5	2.16784	1.73749	0.319259	1.75545e-95	4.86471e-91	receptor accessory protein 5 [Source:ZFIN;Acc:ZDB-GENE-030131-9181]	GO:0016020(membrane);GO:0016021(integral component of membrane)	NA	K17279	NA
2	ENSDARG00000100558	slbp	1.07619	0.747427	0.525934	2.06155e-95	5.71296e-91	stem-loop binding protein [Source:ZFIN;Acc:ZDB-GENE-030131-9686]	GO:0003407(neural retina development);GO:0003723(RNA binding);GO:0003729(mRNA binding);GO:0005634(nucleus);GO:0005737(cytoplasm);GO:0006398(mRNA 3'-end processing by stem-loop binding and cleavage);GO:0031290(retinal ganglion cell axon guidance);GO:0046530(photoreceptor cell differentiation);GO:0051028(mRNA transport);GO:0071204(histone pre-mRNA 3'end processing complex);GO:0071207(histone pre-mR…	NA	K18710	NA
2	ENSDARG00000040620	psmg1	0.836823	0.651663	0.360797	2.45271e-95	6.79695e-91	proteasome (prosome, macropain) assembly chaperone 1 [Source:ZFIN;Acc:ZDB-GENE-040718-469]	GO:0005737(cytoplasm);GO:0005783(endoplasmic reticulum);GO:0043248(proteasome assembly);GO:0070628(proteasome binding);GO:0080129(proteasome core complex assembly)	NA	K11875	NA
2	ENSDARG00000041875	ube2v1	1.43577	1.14496	0.326529	3.86817e-95	1.07195e-90	ubiquitin-conjugating enzyme E2 variant 1 [Source:ZFIN;Acc:ZDB-GENE-051030-102]	GO:0005634(nucleus);GO:0006301(postreplication repair);GO:0035370(UBC13-UEV1A complex);GO:0061631(ubiquitin conjugating enzyme activity);GO:0070534(protein K63-linked ubiquitination)	NA	K10704	NA
2	ENSDARG00000014366	luc7l3	0.864525	0.695544	0.313766	4.44396e-95	1.23151e-90	LUC7-like 3 pre-mRNA splicing factor [Source:ZFIN;Acc:ZDB-GENE-060616-375]	GO:0003729(mRNA binding);GO:0005685(U1 snRNP);GO:0006376(mRNA splice site selection);GO:0071004(U2-type prespliceosome)	NA	NA	NA
2	ENSDARG00000015050	calm3a	2.29407	1.43349	0.678373	5.14427e-95	1.42558e-90	calmodulin 3a (phosphorylase kinase, delta) [Source:ZFIN;Acc:ZDB-GENE-030131-5590]	GO:0005509(calcium ion binding);GO:0019722(calcium-mediated signaling);GO:0046872(metal ion binding)	04020(Calcium signaling pathway);04070(Phosphatidylinositol signaling system);04114(Oocyte meiosis);04218(Cellular senescence);04261(Adrenergic signaling in cardiomyocytes);04270(Vascular smooth muscle contraction);04371(Apelin signaling pathway);04625(C-type lectin receptor signaling pathway);04744(Phototransduction);04910(Insulin signaling pathway);04912(GnRH signaling pathway);04916(Melanogene…	K02183	NA
2	ENSDARG00000005230	ssr2	6.414	3.33832	0.942103	5.32018e-95	1.47433e-90	signal sequence receptor, beta [Source:ZFIN;Acc:ZDB-GENE-010413-1]	GO:0005783(endoplasmic reticulum);GO:0005789(endoplasmic reticulum membrane);GO:0016020(membrane);GO:0016021(integral component of membrane)	04141(Protein processing in endoplasmic reticulum)	K13250	NA
2	ENSDARG00000002523	hsdl2	0.832674	0.652932	0.350819	5.55532e-95	1.53949e-90	hydroxysteroid dehydrogenase like 2 [Source:ZFIN;Acc:ZDB-GENE-030131-1066]	GO:0005777(peroxisome);GO:0016491(oxidoreductase activity);GO:0055114(oxidation-reduction process)	NA	NA	NA
2	ENSDARG00000045877	ube2nb	0.624789	0.504163	0.309479	6.90289e-95	1.91293e-90	ubiquitin-conjugating enzyme E2Nb [Source:ZFIN;Acc:ZDB-GENE-040426-1291]	GO:0000166(nucleotide binding);GO:0000724(double-strand break repair via homologous recombination);GO:0000729(DNA double-strand break processing);GO:0005524(ATP binding);GO:0005634(nucleus);GO:0006301(postreplication repair);GO:0016567(protein ubiquitination);GO:0016574(histone ubiquitination);GO:0016740(transferase activity);GO:0031058(positive regulation of histone modification);GO:0031372(UBC1…	04120(Ubiquitin mediated proteolysis)	K10580	EC:2.3.2.23
2	ENSDARG00000056720	utp3	0.898187	0.718344	0.322341	7.67003e-95	2.12552e-90	UTP3, small subunit (SSU) processome component, homolog (S. cerevisiae) [Source:ZFIN;Acc:ZDB-GENE-040912-163]	GO:0000462(maturation of SSU-rRNA from tricistronic rRNA transcript (SSU-rRNA, 5.8S rRNA, LSU-rRNA));GO:0003674(molecular_function);GO:0005730(nucleolus);GO:0032040(small-subunit processome)	NA	K14767	NA
2	ENSDARG00000116835	park7	0.626122	0.510535	0.294433	8.117e-95	2.24938e-90	parkinson protein 7 [Source:ZFIN;Acc:ZDB-GENE-041010-5]	GO:0003723(RNA binding);GO:0003729(mRNA binding);GO:0005634(nucleus);GO:0005737(cytoplasm);GO:0005739(mitochondrion);GO:0005829(cytosol);GO:0005886(plasma membrane);GO:0006281(DNA repair);GO:0006508(proteolysis);GO:0006517(protein deglycosylation);GO:0006914(autophagy);GO:0006954(inflammatory response);GO:0006979(response to oxidative stress);GO:0007338(single fertilization);GO:0008233(peptidase …	NA	K05687	EC:3.5.1.124
2	ENSDARG00000077776	csnk2b	1.90797	1.40605	0.44039	8.22995e-95	2.28068e-90	casein kinase 2, beta polypeptide [Source:ZFIN;Acc:ZDB-GENE-990415-29]	GO:0003682(chromatin binding);GO:0004674(protein serine/threonine kinase activity);GO:0005102(signaling receptor binding);GO:0005634(nucleus);GO:0005737(cytoplasm);GO:0005886(plasma membrane);GO:0005956(protein kinase CK2 complex);GO:0006468(protein phosphorylation);GO:0008134(transcription factor binding);GO:0010862(positive regulation of pathway-restricted SMAD protein phosphorylation);GO:00160…	03008(Ribosome biogenesis in eukaryotes);04137(Mitophagy - animal);04310(Wnt signaling pathway);04520(Adherens junction)	K03115	NA
2	ENSDARG00000017874	dnajc3b	0.449106	0.369157	0.28282	8.61368e-95	2.38702e-90	DnaJ (Hsp40) homolog, subfamily C, member 3b [Source:ZFIN;Acc:ZDB-GENE-000831-4]	GO:0005515(protein binding);GO:0005783(endoplasmic reticulum);GO:0034975(protein folding in endoplasmic reticulum);GO:0051082(unfolded protein binding);GO:0051087(chaperone binding);GO:0051787(misfolded protein binding)	NA	NA	NA
2	ENSDARG00000018049	sf3b2	1.26444	0.91447	0.467494	9.56466e-95	2.65056e-90	splicing factor 3b, subunit 2 [Source:ZFIN;Acc:ZDB-GENE-070928-1]	GO:0000398(mRNA splicing, via spliceosome);GO:0005634(nucleus);GO:0005686(U2 snRNP);GO:0005689(U12-type spliceosomal complex);GO:0071013(catalytic step 2 spliceosome)	03040(Spliceosome)	K12829	NA
2	ENSDARG00000102744	mgst3a	0.641719	0.508057	0.336949	1.10128e-94	3.05186e-90	microsomal glutathione S-transferase 3a [Source:ZFIN;Acc:ZDB-GENE-040426-2767]	GO:0004364(glutathione transferase activity);GO:0004602(glutathione peroxidase activity);GO:0005635(nuclear envelope);GO:0005783(endoplasmic reticulum);GO:0016020(membrane);GO:0016021(integral component of membrane);GO:0098869(cellular oxidant detoxification)	00480(Glutathione metabolism);00980(Metabolism of xenobiotics by cytochrome P450);00982(Drug metabolism - cytochrome P450);00983(Drug metabolism - other enzymes)	K00799	EC:2.5.1.18
2	ENSDARG00000074057	calm3b	2.70389	1.74216	0.634155	1.13455e-94	3.14407e-90	calmodulin 3b (phosphorylase kinase, delta) [Source:ZFIN;Acc:ZDB-GENE-030131-527]	GO:0005509(calcium ion binding);GO:0019722(calcium-mediated signaling);GO:0046872(metal ion binding)	04020(Calcium signaling pathway);04070(Phosphatidylinositol signaling system);04114(Oocyte meiosis);04218(Cellular senescence);04261(Adrenergic signaling in cardiomyocytes);04270(Vascular smooth muscle contraction);04371(Apelin signaling pathway);04625(C-type lectin receptor signaling pathway);04744(Phototransduction);04910(Insulin signaling pathway);04912(GnRH signaling pathway);04916(Melanogene…	K02183	NA
2	ENSDARG00000070828	actl6a	0.510909	0.412423	0.308941	1.44413e-94	4.00197e-90	actin-like 6A [Source:ZFIN;Acc:ZDB-GENE-020419-36]	GO:0043044(ATP-dependent chromatin remodeling);GO:0071564(npBAF complex)	NA	K11340	NA
2	ENSDARG00000020482	nono	0.726394	0.589574	0.301079	1.55278e-94	4.30307e-90	non-POU domain containing, octamer-binding [Source:ZFIN;Acc:ZDB-GENE-030131-713]	GO:0000976(transcription regulatory region sequence-specific DNA binding);GO:0003676(nucleic acid binding);GO:0003723(RNA binding);GO:0005634(nucleus);GO:0007417(central nervous system development);GO:0061053(somite development);GO:0071599(otic vesicle development)	NA	K13214	NA
2	ENSDARG00000078785	tmem258	2.61305	1.57323	0.732003	1.60176e-94	4.4388e-90	transmembrane protein 258 [Source:ZFIN;Acc:ZDB-GENE-040426-1739]	GO:0003674(molecular_function);GO:0005783(endoplasmic reticulum);GO:0006486(protein glycosylation);GO:0006487(protein N-linked glycosylation);GO:0016020(membrane);GO:0016021(integral component of membrane);GO:0034998(oligosaccharyltransferase I complex)	NA	NA	NA
2	ENSDARG00000054907	cox7a2l	1.00655	0.798618	0.333835	1.71392e-94	4.74962e-90	cytochrome c oxidase subunit 7A2 like [Source:ZFIN;Acc:ZDB-GENE-030131-7691]	GO:0002082(regulation of oxidative phosphorylation);GO:0004129(cytochrome-c oxidase activity);GO:0005746(mitochondrial respirasome);GO:0009055(electron transfer activity);GO:0016020(membrane);GO:0016021(integral component of membrane);GO:0022900(electron transport chain);GO:0097250(mitochondrial respirasome assembly);GO:1902600(proton transmembrane transport)	00190(Oxidative phosphorylation);04260(Cardiac muscle contraction)	K02270	NA
2	ENSDARG00000017891	tcp1	3.79938	2.18889	0.795563	1.7171e-94	4.75841e-90	t-complex 1 [Source:ZFIN;Acc:ZDB-GENE-990714-24]	GO:0000166(nucleotide binding);GO:0005524(ATP binding);GO:0005737(cytoplasm);GO:0005832(chaperonin-containing T-complex);GO:0006457(protein folding);GO:0051082(unfolded protein binding);GO:0070121(Kupffer's vesicle development)	NA	K09493	NA
2	ENSDARG00000004280	seh1l	0.482239	0.389903	0.306632	1.73016e-94	4.79461e-90	SEH1-like (S. cerevisiae) [Source:ZFIN;Acc:ZDB-GENE-030131-6689]	GO:0000775(chromosome, centromeric region);GO:0000776(kinetochore);GO:0000777(condensed chromosome kinetochore);GO:0005198(structural molecule activity);GO:0005515(protein binding);GO:0005634(nucleus);GO:0005643(nuclear pore);GO:0005694(chromosome);GO:0005764(lysosome);GO:0005765(lysosomal membrane);GO:0006999(nuclear pore organization);GO:0007049(cell cycle);GO:0007059(chromosome segregation);GO…	03013(RNA transport);04150(mTOR signaling pathway)	K14299	NA
2	ENSDARG00000075536	cpne1	1.29116	0.998299	0.371119	1.78884e-94	4.95723e-90	copine I [Source:ZFIN;Acc:ZDB-GENE-030131-3562]	GO:0005544(calcium-dependent phospholipid binding);GO:0005886(plasma membrane);GO:0043122(regulation of I-kappaB kinase/NF-kappaB signaling);GO:0071277(cellular response to calcium ion);GO:1903265(positive regulation of tumor necrosis factor-mediated signaling pathway)	NA	NA	NA
2	ENSDARG00000089291	cenpx	0.531533	0.432799	0.29646	2.23258e-94	6.18693e-90	centromere protein X [Source:ZFIN;Acc:ZDB-GENE-110411-78]	GO:0000712(resolution of meiotic recombination intermediates);GO:0003690(double-stranded DNA binding);GO:0006281(DNA repair);GO:0031297(replication fork processing);GO:0043240(Fanconi anaemia nuclear complex);GO:0046982(protein heterodimerization activity);GO:0051382(kinetochore assembly);GO:0071821(FANCM-MHF complex)	03460(Fanconi anemia pathway)	K15360	NA
2	ENSDARG00000014017	rrm1	0.773565	0.569609	0.441549	2.35532e-94	6.52706e-90	ribonucleotide reductase M1 polypeptide [Source:ZFIN;Acc:ZDB-GENE-990415-247]	GO:0000166(nucleotide binding);GO:0004748(ribonucleoside-diphosphate reductase activity, thioredoxin disulfide as acceptor);GO:0005524(ATP binding);GO:0006260(DNA replication);GO:0016491(oxidoreductase activity);GO:0055114(oxidation-reduction process)	00230(Purine metabolism);00240(Pyrimidine metabolism);00480(Glutathione metabolism);00983(Drug metabolism - other enzymes)	K10807	EC:1.17.4.1
2	ENSDARG00000056108	ndufa4	0.935931	0.644917	0.537289	2.59296e-94	7.1856e-90	NADH:ubiquinone oxidoreductase subunit A4 [Source:ZFIN;Acc:ZDB-GENE-040426-1962]	GO:0004129(cytochrome-c oxidase activity);GO:0005739(mitochondrion);GO:0005743(mitochondrial inner membrane);GO:0005751(mitochondrial respiratory chain complex IV);GO:0016020(membrane);GO:0022900(electron transport chain);GO:0055114(oxidation-reduction process);GO:0070469(respirasome);GO:1902600(proton transmembrane transport)	00190(Oxidative phosphorylation)	K03948	NA
2	ENSDARG00000011125	snrpb	4.3511	2.49033	0.805046	2.83939e-94	7.8685e-90	small nuclear ribonucleoprotein polypeptides B and B1 [Source:ZFIN;Acc:ZDB-GENE-040426-1819]	GO:0000398(mRNA splicing, via spliceosome);GO:0003723(RNA binding);GO:0005634(nucleus);GO:0005682(U5 snRNP);GO:0005685(U1 snRNP);GO:0005686(U2 snRNP);GO:0005687(U4 snRNP);GO:0005737(cytoplasm);GO:0046540(U4/U6 x U5 tri-snRNP complex);GO:0071004(U2-type prespliceosome);GO:0071013(catalytic step 2 spliceosome)	03040(Spliceosome)	K11086	NA
2	ENSDARG00000053217	cox7a2a	4.49261	2.52624	0.830562	2.93701e-94	8.13903e-90	cytochrome c oxidase subunit 7A2a [Source:ZFIN;Acc:ZDB-GENE-050522-153]	GO:0002082(regulation of oxidative phosphorylation);GO:0004129(cytochrome-c oxidase activity);GO:0005746(mitochondrial respirasome);GO:0009055(electron transfer activity);GO:0016020(membrane);GO:0016021(integral component of membrane);GO:0022900(electron transport chain);GO:0097250(mitochondrial respirasome assembly);GO:1902600(proton transmembrane transport)	00190(Oxidative phosphorylation);04260(Cardiac muscle contraction)	K02270	NA
2	ENSDARG00000070431	fip1l1b	0.584747	0.474797	0.300502	3.46268e-94	9.59577e-90	FIP1 like 1b (S. cerevisiae) [Source:ZFIN;Acc:ZDB-GENE-041010-138]	GO:0005847(mRNA cleavage and polyadenylation specificity factor complex);GO:0098789(pre-mRNA cleavage required for polyadenylation)	03015(mRNA surveillance pathway)	K14405	NA
2	ENSDARG00000007216	abce1	1.6023	1.11143	0.527726	3.54622e-94	9.82729e-90	ATP-binding cassette, sub-family E (OABP), member 1 [Source:ZFIN;Acc:ZDB-GENE-040426-1995]	GO:0000054(ribosomal subunit export from nucleus);GO:0000166(nucleotide binding);GO:0005506(iron ion binding);GO:0005524(ATP binding);GO:0005623(cell);GO:0006413(translational initiation);GO:0006415(translational termination);GO:0016887(ATPase activity);GO:0043024(ribosomal small subunit binding)	NA	K06174	NA
2	ENSDARG00000035625	snrnp27	0.631468	0.518425	0.284575	4.13829e-94	1.1468e-89	small nuclear ribonucleoprotein 27 (U4/U6.U5) [Source:ZFIN;Acc:ZDB-GENE-040718-457]	GO:0003674(molecular_function);GO:0005634(nucleus);GO:0006397(mRNA processing);GO:0008380(RNA splicing)	03040(Spliceosome)	K12846	NA
2	ENSDARG00000103846	hspa5	8.91201	3.84608	1.21236	5.10605e-94	1.41499e-89	heat shock protein 5 [Source:ZFIN;Acc:ZDB-GENE-031001-11]	GO:0000166(nucleotide binding);GO:0001666(response to hypoxia);GO:0001878(response to yeast);GO:0005524(ATP binding);GO:0005576(extracellular region);GO:0005634(nucleus);GO:0005737(cytoplasm);GO:0005788(endoplasmic reticulum lumen);GO:0006986(response to unfolded protein);GO:0016020(membrane);GO:0016887(ATPase activity);GO:0030433(ubiquitin-dependent ERAD pathway);GO:0030968(endoplasmic reticulum…	03060(Protein export);04141(Protein processing in endoplasmic reticulum)	K09490	NA
2	ENSDARG00000036721	tomm40l	0.55963	0.434655	0.364604	5.27251e-94	1.46112e-89	translocase of outer mitochondrial membrane 40 homolog, like [Source:ZFIN;Acc:ZDB-GENE-040426-2319]	GO:0005741(mitochondrial outer membrane);GO:0005742(mitochondrial outer membrane translocase complex);GO:0008320(protein transmembrane transporter activity);GO:0030150(protein import into mitochondrial matrix);GO:0055085(transmembrane transport)	NA	K11518	NA
2	ENSDARG00000096118	ost4	1.08339	0.764187	0.503553	8.81794e-94	2.44363e-89	oligosaccharyltransferase complex subunit 4 (non-catalytic) [Source:ZFIN;Acc:ZDB-GENE-110307-1]	GO:0016020(membrane);GO:0016021(integral component of membrane)	NA	NA	NA
2	ENSDARG00000043511	prdx6	1.35259	1.01827	0.409612	9.2795e-94	2.57153e-89	peroxiredoxin 6 [Source:ZFIN;Acc:ZDB-GENE-040426-1778]	GO:0004601(peroxidase activity);GO:0005515(protein binding);GO:0005829(cytosol);GO:0006979(response to oxidative stress);GO:0016209(antioxidant activity);GO:0016491(oxidoreductase activity);GO:0034599(cellular response to oxidative stress);GO:0042744(hydrogen peroxide catabolic process);GO:0045454(cell redox homeostasis);GO:0051920(peroxiredoxin activity);GO:0055114(oxidation-reduction process);G…	NA	NA	NA
2	ENSDARG00000104517	uqcr10	2.45886	1.5124	0.701145	1.37832e-93	3.8196e-89	ubiquinol-cytochrome c reductase, complex III subunit X [Source:ZFIN;Acc:ZDB-GENE-170406-3]	GO:0005743(mitochondrial inner membrane);GO:0005750(mitochondrial respiratory chain complex III);GO:0006122(mitochondrial electron transport, ubiquinol to cytochrome c);GO:0008121(ubiquinol-cytochrome-c reductase activity);GO:0009060(aerobic respiration);GO:0034551(mitochondrial respiratory chain complex III assembly)	00190(Oxidative phosphorylation);04260(Cardiac muscle contraction)	K00419	NA
2	ENSDARG00000078500	dap3	0.475935	0.395448	0.267277	1.5226e-93	4.21943e-89	death associated protein 3 [Source:ZFIN;Acc:ZDB-GENE-051129-2]	GO:0001666(response to hypoxia);GO:0003735(structural constituent of ribosome);GO:0005761(mitochondrial ribosome);GO:0005763(mitochondrial small ribosomal subunit);GO:0006915(apoptotic process);GO:0015935(small ribosomal subunit)	NA	K17408	NA
2	ENSDARG00000012387	pdha1a	0.529395	0.423942	0.320479	1.59597e-93	4.42275e-89	pyruvate dehydrogenase E1 alpha 1 subunit a [Source:ZFIN;Acc:ZDB-GENE-040426-2719]	GO:0004739(pyruvate dehydrogenase (acetyl-transferring) activity);GO:0005739(mitochondrion);GO:0006086(acetyl-CoA biosynthetic process from pyruvate);GO:0016491(oxidoreductase activity);GO:0016624(oxidoreductase activity, acting on the aldehyde or oxo group of donors, disulfide as acceptor);GO:0043231(intracellular membrane-bounded organelle);GO:0055114(oxidation-reduction process)	00010(Glycolysis / Gluconeogenesis);00020(Citrate cycle (TCA cycle));00620(Pyruvate metabolism)	K00161	EC:1.2.4.1
2	ENSDARG00000101915	pin1	0.896918	0.745513	0.266742	1.8755e-93	5.19738e-89	peptidylprolyl cis/trans isomerase, NIMA-interacting 1 [Source:ZFIN;Acc:ZDB-GENE-040426-1714]	GO:0000413(protein peptidyl-prolyl isomerization);GO:0003755(peptidyl-prolyl cis-trans isomerase activity);GO:0005515(protein binding);GO:0005634(nucleus);GO:0005737(cytoplasm);GO:0005829(cytosol);GO:0008045(motor neuron axon guidance);GO:0016853(isomerase activity);GO:1902229(regulation of intrinsic apoptotic signaling pathway in response to DNA damage)	04622(RIG-I-like receptor signaling pathway)	K09578	EC:5.2.1.8
2	ENSDARG00000038028	ndufa6	1.14562	0.853839	0.424093	1.9345e-93	5.36087e-89	NADH:ubiquinone oxidoreductase subunit A6 [Source:ZFIN;Acc:ZDB-GENE-040426-1124]	GO:0005739(mitochondrion);GO:0005743(mitochondrial inner membrane);GO:0005747(mitochondrial respiratory chain complex I);GO:0006979(response to oxidative stress);GO:0016020(membrane);GO:0055114(oxidation-reduction process);GO:0070469(respirasome)	00190(Oxidative phosphorylation)	K03950	NA
2	ENSDARG00000002082	csnk2a1	0.797613	0.657492	0.278716	1.96318e-93	5.44036e-89	casein kinase 2, alpha 1 polypeptide [Source:ZFIN;Acc:ZDB-GENE-990415-27]	GO:0000166(nucleotide binding);GO:0004672(protein kinase activity);GO:0004674(protein serine/threonine kinase activity);GO:0005524(ATP binding);GO:0006468(protein phosphorylation);GO:0016301(kinase activity);GO:0016310(phosphorylation)	03008(Ribosome biogenesis in eukaryotes);04137(Mitophagy - animal);04310(Wnt signaling pathway);04520(Adherens junction)	K03097	EC:2.7.11.1
2	ENSDARG00000005134	psmd11b	0.464401	0.385767	0.267639	2.1836e-93	6.05118e-89	proteasome 26S subunit, non-ATPase 11b [Source:ZFIN;Acc:ZDB-GENE-030131-984]	GO:0000502(proteasome complex);GO:0005198(structural molecule activity);GO:0005515(protein binding);GO:0005634(nucleus);GO:0005737(cytoplasm);GO:0005829(cytosol);GO:0006511(ubiquitin-dependent protein catabolic process);GO:0008541(proteasome regulatory particle, lid subcomplex);GO:0022624(proteasome accessory complex);GO:0043248(proteasome assembly);GO:0048863(stem cell differentiation)	03050(Proteasome)	K03036	NA
2	ENSDARG00000004948	bccip	1.18647	0.949914	0.320804	2.20008e-93	6.09685e-89	BRCA2 and CDKN1A interacting protein [Source:ZFIN;Acc:ZDB-GENE-050320-39]	NA	NA	K15262	NA
2	ENSDARG00000063535	chd4a	1.45853	1.07467	0.440621	3.03336e-93	8.40605e-89	chromodomain helicase DNA binding protein 4a [Source:ZFIN;Acc:ZDB-GENE-041111-187]	GO:0005524(ATP binding);GO:0005634(nucleus);GO:0031101(fin regeneration);GO:0046872(metal ion binding)	NA	K11643	EC:3.6.4.12
2	ENSDARG00000055969	rfc3	0.595499	0.465734	0.354593	3.28569e-93	9.10531e-89	replication factor C (activator 1) 3 [Source:ZFIN;Acc:ZDB-GENE-020809-3]	GO:0003677(DNA binding);GO:0003689(DNA clamp loader activity);GO:0005634(nucleus);GO:0005663(DNA replication factor C complex);GO:0006260(DNA replication);GO:0006261(DNA-dependent DNA replication)	03030(DNA replication);03420(Nucleotide excision repair);03430(Mismatch repair)	K10756	NA
2	ENSDARG00000029071	creld2	0.542911	0.412762	0.395407	3.64335e-93	1.00964e-88	cysteine-rich with EGF-like domains 2 [Source:ZFIN;Acc:ZDB-GENE-040426-1626]	GO:0005509(calcium ion binding);GO:0005576(extracellular region);GO:0005783(endoplasmic reticulum)	NA	NA	NA
2	ENSDARG00000019765	zgc:158803	1.25697	0.993006	0.340072	4.12755e-93	1.14383e-88	zgc:158803 [Source:ZFIN;Acc:ZDB-GENE-070424-15]	GO:0003729(mRNA binding);GO:0005685(U1 snRNP);GO:0006376(mRNA splice site selection);GO:0071004(U2-type prespliceosome)	NA	NA	NA
2	ENSDARG00000018618	cpsf6	0.958686	0.787176	0.284372	4.51162e-93	1.25026e-88	cleavage and polyadenylation specific factor 6 [Source:ZFIN;Acc:ZDB-GENE-030131-5277]	GO:0003676(nucleic acid binding);GO:0003723(RNA binding);GO:0003729(mRNA binding);GO:0005634(nucleus);GO:0005654(nucleoplasm);GO:0005726(perichromatin fibrils);GO:0005737(cytoplasm);GO:0005849(mRNA cleavage factor complex);GO:0006397(mRNA processing);GO:0016607(nuclear speck);GO:0035061(interchromatin granule);GO:0042382(paraspeckles);GO:0046833(positive regulation of RNA export from nucleus);GO:…	03015(mRNA surveillance pathway)	K14398	NA
2	ENSDARG00000009170	ctr9	0.576828	0.473134	0.285893	4.82218e-93	1.33632e-88	CTR9 homolog, Paf1/RNA polymerase II complex component [Source:ZFIN;Acc:ZDB-GENE-030131-3782]	GO:0000993(RNA polymerase II complex binding);GO:0001756(somitogenesis);GO:0005515(protein binding);GO:0005634(nucleus);GO:0006355(regulation of transcription, DNA-templated);GO:0007507(heart development);GO:0014032(neural crest cell development);GO:0016570(histone modification);GO:0016593(Cdc73/Paf1 complex);GO:0043473(pigmentation);GO:0051569(regulation of histone H3-K4 methylation)	NA	K15176	NA
2	ENSDARG00000005191	ahcy	4.70745	2.71368	0.794693	5.6616e-93	1.56894e-88	adenosylhomocysteinase [Source:ZFIN;Acc:ZDB-GENE-031219-6]	GO:0004013(adenosylhomocysteinase activity);GO:0005829(cytosol);GO:0006730(one-carbon metabolic process);GO:0016787(hydrolase activity);GO:0019510(S-adenosylhomocysteine catabolic process);GO:0033353(S-adenosylmethionine cycle);GO:0051287(NAD binding)	00270(Cysteine and methionine metabolism)	K01251	EC:3.3.1.1
2	ENSDARG00000037570	polr1d	0.684642	0.518014	0.40236	7.52044e-93	2.08407e-88	RNA polymerase I and III subunit D [Source:ZFIN;Acc:ZDB-GENE-040930-4]	GO:0001054(RNA polymerase I activity);GO:0001056(RNA polymerase III activity);GO:0003677(DNA binding);GO:0003899(DNA-directed 5'-3' RNA polymerase activity);GO:0005634(nucleus);GO:0005666(RNA polymerase III complex);GO:0005736(RNA polymerase I complex);GO:0006351(transcription, DNA-templated);GO:0006360(transcription by RNA polymerase I);GO:0006383(transcription by RNA polymerase III);GO:0042254(…	03020(RNA polymerase);04623(Cytosolic DNA-sensing pathway)	K03020	NA
2	ENSDARG00000104938	ftsj3	0.554282	0.447511	0.308698	7.74531e-93	2.14638e-88	FtsJ RNA methyltransferase homolog 3 [Source:ZFIN;Acc:ZDB-GENE-030131-9828]	GO:0000453(enzyme-directed rRNA 2'-O-methylation);GO:0000463(maturation of LSU-rRNA from tricistronic rRNA transcript (SSU-rRNA, 5.8S rRNA, LSU-rRNA));GO:0000466(maturation of 5.8S rRNA from tricistronic rRNA transcript (SSU-rRNA, 5.8S rRNA, LSU-rRNA));GO:0001510(RNA methylation);GO:0005634(nucleus);GO:0005730(nucleolus);GO:0006364(rRNA processing);GO:0008168(methyltransferase activity);GO:000864…	NA	K14857	EC:2.1.1.-
2	ENSDARG00000012656	atf6	1.26473	0.872057	0.536336	8.31168e-93	2.30333e-88	activating transcription factor 6 [Source:ZFIN;Acc:ZDB-GENE-041014-328]	GO:0001666(response to hypoxia);GO:0003700(DNA-binding transcription factor activity);GO:0005634(nucleus);GO:0005789(endoplasmic reticulum membrane);GO:0006355(regulation of transcription, DNA-templated);GO:0030968(endoplasmic reticulum unfolded protein response);GO:0035497(cAMP response element binding);GO:0045944(positive regulation of transcription by RNA polymerase II)	04141(Protein processing in endoplasmic reticulum)	K09054	NA
2	ENSDARG00000001241	puf60b	0.646399	0.524537	0.30138	8.35957e-93	2.3166e-88	poly-U binding splicing factor b [Source:ZFIN;Acc:ZDB-GENE-040625-116]	GO:0003676(nucleic acid binding);GO:0003677(DNA binding);GO:0003723(RNA binding);GO:0005634(nucleus);GO:0006397(mRNA processing);GO:0006915(apoptotic process);GO:0008380(RNA splicing)	NA	NA	NA
2	ENSDARG00000069116	timm10	0.727648	0.546125	0.414011	9.82233e-93	2.72196e-88	translocase of inner mitochondrial membrane 10 homolog (yeast) [Source:ZFIN;Acc:ZDB-GENE-040718-427]	GO:0005739(mitochondrion);GO:0005743(mitochondrial inner membrane);GO:0008565(protein transporter activity);GO:0015031(protein transport);GO:0016020(membrane);GO:0042719(mitochondrial intermembrane space protein transporter complex);GO:0042721(TIM22 mitochondrial import inner membrane insertion complex);GO:0045039(protein insertion into mitochondrial inner membrane);GO:0046872(metal ion binding)	NA	K17778	NA
2	ENSDARG00000017842	syvn1	0.815342	0.660559	0.303716	1.19781e-92	3.31938e-88	synovial apoptosis inhibitor 1, synoviolin [Source:ZFIN;Acc:ZDB-GENE-030131-7166]	GO:0000836(Hrd1p ubiquitin ligase complex);GO:0016020(membrane);GO:0016021(integral component of membrane);GO:0016567(protein ubiquitination);GO:0030433(ubiquitin-dependent ERAD pathway);GO:0061630(ubiquitin protein ligase activity)	04120(Ubiquitin mediated proteolysis);04141(Protein processing in endoplasmic reticulum)	K10601	EC:2.3.2.27
2	ENSDARG00000044102	znf593	0.710216	0.547341	0.375819	1.22288e-92	3.38885e-88	zinc finger protein 593 [Source:ZFIN;Acc:ZDB-GENE-040426-1789]	GO:0000055(ribosomal large subunit export from nucleus);GO:0003676(nucleic acid binding);GO:0005623(cell);GO:0008270(zinc ion binding);GO:0030687(preribosome, large subunit precursor);GO:0043023(ribosomal large subunit binding);GO:0046872(metal ion binding)	NA	K14821	NA
2	ENSDARG00000012495	mphosph10	0.830553	0.647992	0.358097	1.23656e-92	3.42676e-88	M-phase phosphoprotein 10 (U3 small nucleolar ribonucleoprotein) [Source:ZFIN;Acc:ZDB-GENE-030131-2146]	GO:0005634(nucleus);GO:0005730(nucleolus);GO:0005732(small nucleolar ribonucleoprotein complex);GO:0006364(rRNA processing);GO:0032040(small-subunit processome);GO:0034457(Mpp10 complex);GO:0042254(ribosome biogenesis)	03008(Ribosome biogenesis in eukaryotes)	K14559	NA
2	ENSDARG00000027899	sem1	2.10599	1.43427	0.55418	1.38124e-92	3.8277e-88	SEM1, 26S proteasome complex subunit [Source:ZFIN;Acc:ZDB-GENE-030131-988]	GO:0000724(double-strand break repair via homologous recombination);GO:0006406(mRNA export from nucleus);GO:0008541(proteasome regulatory particle, lid subcomplex);GO:0043248(proteasome assembly)	03050(Proteasome);03440(Homologous recombination)	K10881	NA
2	ENSDARG00000035634	rfc5	0.558221	0.442827	0.334094	1.39014e-92	3.85235e-88	replication factor C (activator 1) 5 [Source:ZFIN;Acc:ZDB-GENE-040907-1]	GO:0003677(DNA binding);GO:0003689(DNA clamp loader activity);GO:0005524(ATP binding);GO:0005634(nucleus);GO:0005663(DNA replication factor C complex);GO:0006260(DNA replication);GO:0006261(DNA-dependent DNA replication);GO:0060041(retina development in camera-type eye)	03030(DNA replication);03420(Nucleotide excision repair);03430(Mismatch repair)	K10756	NA
2	ENSDARG00000045733	ciapin1	0.562696	0.449791	0.3231	1.61903e-92	4.48666e-88	cytokine induced apoptosis inhibitor 1 [Source:ZFIN;Acc:ZDB-GENE-040808-57]	GO:0005634(nucleus);GO:0005737(cytoplasm);GO:0005739(mitochondrion);GO:0005758(mitochondrial intermembrane space);GO:0006915(apoptotic process);GO:0009055(electron transfer activity);GO:0016226(iron-sulfur cluster assembly);GO:0022900(electron transport chain);GO:0030097(hemopoiesis);GO:0043066(negative regulation of apoptotic process);GO:0046872(metal ion binding);GO:0051536(iron-sulfur cluster …	NA	K22746	NA
2	ENSDARG00000018432	m6pr	0.702971	0.585449	0.263923	1.62939e-92	4.51536e-88	mannose-6-phosphate receptor (cation dependent) [Source:ZFIN;Acc:ZDB-GENE-040426-2285]	GO:0005537(mannose binding);GO:0005768(endosome);GO:0005770(late endosome);GO:0005794(Golgi apparatus);GO:0005802(trans-Golgi network);GO:0006622(protein targeting to lysosome);GO:0016020(membrane);GO:0016021(integral component of membrane);GO:0019904(protein domain specific binding);GO:0030904(retromer complex);GO:0033299(secretion of lysosomal enzymes);GO:0048471(perinuclear region of cytoplasm…	04142(Lysosome);04145(Phagosome)	K10089	NA
2	ENSDARG00000039429	adka	0.546809	0.446894	0.291104	1.71748e-92	4.75948e-88	adenosine kinase a [Source:ZFIN;Acc:ZDB-GENE-030425-3]	GO:0004001(adenosine kinase activity);GO:0005634(nucleus);GO:0005829(cytosol);GO:0006166(purine ribonucleoside salvage);GO:0006167(AMP biosynthetic process);GO:0016301(kinase activity);GO:0016310(phosphorylation);GO:0016773(phosphotransferase activity, alcohol group as acceptor)	00230(Purine metabolism)	K00856	EC:2.7.1.20
2	ENSDARG00000042539	ywhaqa	2.76557	1.74487	0.664457	2.20665e-92	6.11506e-88	tyrosine 3-monooxygenase/tryptophan 5-monooxygenase activation protein, theta polypeptide a [Source:ZFIN;Acc:ZDB-GENE-040122-5]	GO:0004497(monooxygenase activity);GO:0019904(protein domain specific binding);GO:0055114(oxidation-reduction process)	04110(Cell cycle);04114(Oocyte meiosis)	K16197	NA
2	ENSDARG00000018006	vrk1	0.661109	0.527867	0.324711	2.79767e-92	7.75291e-88	VRK serine/threonine kinase 1 [Source:ZFIN;Acc:ZDB-GENE-040426-2709]	GO:0000166(nucleotide binding);GO:0004672(protein kinase activity);GO:0004674(protein serine/threonine kinase activity);GO:0005524(ATP binding);GO:0006468(protein phosphorylation)	NA	K08816	EC:2.7.11.1
2	ENSDARG00000004470	prkcsh	0.984268	0.740806	0.409957	2.80672e-92	7.77799e-88	protein kinase C substrate 80K-H [Source:ZFIN;Acc:ZDB-GENE-040426-770]	GO:0001889(liver development);GO:0005509(calcium ion binding);GO:0005783(endoplasmic reticulum);GO:0006491(N-glycan processing);GO:0016020(membrane);GO:0016021(integral component of membrane);GO:0048793(pronephros development)	04141(Protein processing in endoplasmic reticulum)	K08288	NA
2	ENSDARG00000023299	snu13b	3.83214	2.1264	0.849736	7.79342e-92	2.15971e-87	SNU13 homolog, small nuclear ribonucleoprotein b (U4/U6.U5) [Source:ZFIN;Acc:ZDB-GENE-030131-9670]	GO:0000398(mRNA splicing, via spliceosome);GO:0000470(maturation of LSU-rRNA);GO:0003723(RNA binding);GO:0005730(nucleolus);GO:0031428(box C/D snoRNP complex);GO:0032040(small-subunit processome);GO:0042254(ribosome biogenesis);GO:0046540(U4/U6 x U5 tri-snRNP complex);GO:0061053(somite development);GO:1990904(ribonucleoprotein complex)	03008(Ribosome biogenesis in eukaryotes);03040(Spliceosome)	K12845	NA
2	ENSDARG00000040713	rbbp9	0.830175	0.601625	0.464552	7.79945e-92	2.16138e-87	retinoblastoma binding protein 9 [Source:ZFIN;Acc:ZDB-GENE-050208-692]	GO:0016787(hydrolase activity)	NA	K07002	NA
2	ENSDARG00000057624	cops5	0.482783	0.392733	0.297828	1.03926e-91	2.87999e-87	COP9 signalosome subunit 5 [Source:ZFIN;Acc:ZDB-GENE-040426-1686]	GO:0000338(protein deneddylation);GO:0004222(metalloendopeptidase activity);GO:0005515(protein binding);GO:0005634(nucleus);GO:0005737(cytoplasm);GO:0005829(cytosol);GO:0006508(proteolysis);GO:0008021(synaptic vesicle);GO:0008180(COP9 signalosome);GO:0008233(peptidase activity);GO:0008237(metallopeptidase activity);GO:0016787(hydrolase activity);GO:0019784(NEDD8-specific protease activity);GO:003…	NA	K09613	EC:3.4.-.-
2	ENSDARG00000058861	ncln	0.473889	0.393334	0.268795	1.15837e-91	3.21008e-87	nicalin [Source:ZFIN;Acc:ZDB-GENE-030131-8788]	GO:0005789(endoplasmic reticulum membrane);GO:0005886(plasma membrane);GO:0007275(multicellular organism development);GO:0009966(regulation of signal transduction);GO:0016020(membrane);GO:0016021(integral component of membrane);GO:0048484(enteric nervous system development);GO:1900176(negative regulation of nodal signaling pathway involved in determination of lateral mesoderm left/right asymmetry)	NA	NA	NA
2	ENSDARG00000037177	zc3h13	0.742635	0.584284	0.345982	1.5656e-91	4.33859e-87	zinc finger CCCH-type containing 13 [Source:ZFIN;Acc:ZDB-GENE-040426-1619]	GO:0046872(metal ion binding)	NA	K22909	NA
2	ENSDARG00000042894	tyms	0.663231	0.490948	0.43394	1.60711e-91	4.45362e-87	thymidylate synthetase [Source:ZFIN;Acc:ZDB-GENE-040426-59]	GO:0001654(eye development);GO:0004799(thymidylate synthase activity);GO:0006231(dTMP biosynthetic process);GO:0032259(methylation);GO:0042083(5,10-methylenetetrahydrofolate-dependent methyltransferase activity);GO:0060041(retina development in camera-type eye)	00240(Pyrimidine metabolism);00670(One carbon pool by folate)	K00560	EC:2.1.1.45
2	ENSDARG00000017454	nup50	0.527196	0.434062	0.280437	1.69437e-91	4.69543e-87	nucleoporin 50 [Source:ZFIN;Acc:ZDB-GENE-030131-1689]	GO:0005096(GTPase activator activity);GO:0005634(nucleus);GO:0005643(nuclear pore);GO:0005737(cytoplasm);GO:0006606(protein import into nucleus);GO:0008536(Ran GTPase binding);GO:0043547(positive regulation of GTPase activity);GO:0046907(intracellular transport)	03013(RNA transport)	K14295	NA
2	ENSDARG00000016173	cct3	4.15989	2.40128	0.792744	2.09056e-91	5.79336e-87	chaperonin containing TCP1, subunit 3 (gamma) [Source:ZFIN;Acc:ZDB-GENE-020419-5]	GO:0000166(nucleotide binding);GO:0005524(ATP binding);GO:0005737(cytoplasm);GO:0005832(chaperonin-containing T-complex);GO:0006457(protein folding);GO:0046671(negative regulation of retinal cell programmed cell death);GO:0048048(embryonic eye morphogenesis);GO:0051082(unfolded protein binding)	NA	K09495	NA
2	ENSDARG00000006219	gnl3	0.966027	0.783768	0.301637	2.09306e-91	5.80028e-87	guanine nucleotide binding protein-like 3 (nucleolar) [Source:ZFIN;Acc:ZDB-GENE-030131-616]	GO:0005525(GTP binding)	03008(Ribosome biogenesis in eukaryotes)	K14538	NA
2	ENSDARG00000043960	rpf2	0.608273	0.497584	0.289778	2.19386e-91	6.07962e-87	ribosome production factor 2 homolog [Source:ZFIN;Acc:ZDB-GENE-040426-2501]	GO:0000027(ribosomal large subunit assembly);GO:0000463(maturation of LSU-rRNA from tricistronic rRNA transcript (SSU-rRNA, 5.8S rRNA, LSU-rRNA));GO:0000470(maturation of LSU-rRNA);GO:0005730(nucleolus);GO:0019843(rRNA binding)	NA	K14847	NA
2	ENSDARG00000027916	fntb	0.57404	0.478056	0.263972	2.44412e-91	6.77313e-87	farnesyltransferase, CAAX box, beta [Source:ZFIN;Acc:ZDB-GENE-030131-2220]	GO:0003231(cardiac ventricle development);GO:0003824(catalytic activity);GO:0004659(prenyltransferase activity);GO:0004660(protein farnesyltransferase activity);GO:0005965(protein farnesyltransferase complex);GO:0008270(zinc ion binding);GO:0016740(transferase activity);GO:0018342(protein prenylation);GO:0018343(protein farnesylation);GO:0046872(metal ion binding)	00900(Terpenoid backbone biosynthesis)	K05954	EC:2.5.1.58
2	ENSDARG00000100505	ddx52	0.412798	0.34316	0.266556	2.59837e-91	7.20059e-87	DEAD (Asp-Glu-Ala-Asp) box polypeptide 52 [Source:ZFIN;Acc:ZDB-GENE-060623-1]	GO:0003676(nucleic acid binding);GO:0005524(ATP binding)	NA	K14779	EC:3.6.4.13
2	ENSDARG00000056059	rangap1b	0.394099	0.323983	0.282641	2.66161e-91	7.37586e-87	Ran GTPase activating protein 1b [Source:ZFIN;Acc:ZDB-GENE-040426-1921]	GO:0005096(GTPase activator activity);GO:0005515(protein binding);GO:0007165(signal transduction);GO:0043547(positive regulation of GTPase activity)	NA	NA	NA
2	ENSDARG00000077264	wdr43	1.41894	1.13164	0.326404	4.18964e-91	1.16103e-86	WD repeat domain 43 [Source:ZFIN;Acc:ZDB-GENE-021231-3]	GO:0001525(angiogenesis);GO:0001570(vasculogenesis);GO:0005515(protein binding);GO:0042254(ribosome biogenesis);GO:0048703(embryonic viscerocranium morphogenesis);GO:0060218(hematopoietic stem cell differentiation)	03008(Ribosome biogenesis in eukaryotes)	K14546	NA
2	ENSDARG00000042520	UTP14C	0.646671	0.495651	0.383707	4.25255e-91	1.17847e-86	si:dkey-251i10.3 [Source:ZFIN;Acc:ZDB-GENE-060526-271]	GO:0005730(nucleolus);GO:0006364(rRNA processing);GO:0032040(small-subunit processome)	03008(Ribosome biogenesis in eukaryotes)	K14567	NA
2	ENSDARG00000070589	mrpl35	0.502419	0.398295	0.335054	4.28945e-91	1.18869e-86	mitochondrial ribosomal protein L35 [Source:ZFIN;Acc:ZDB-GENE-060929-1082]	GO:0003735(structural constituent of ribosome);GO:0005622(intracellular);GO:0005739(mitochondrion);GO:0005840(ribosome);GO:0006412(translation)	03010(Ribosome)	K02916	NA
2	ENSDARG00000098059	fkbp3	2.03963	1.44747	0.494772	4.67747e-91	1.29622e-86	FKBP prolyl isomerase 3 [Source:ZFIN;Acc:ZDB-GENE-030616-419]	GO:0000413(protein peptidyl-prolyl isomerization);GO:0003755(peptidyl-prolyl cis-trans isomerase activity);GO:0016853(isomerase activity)	NA	NA	NA
2	ENSDARG00000027141	ube2l3b	1.63784	1.33073	0.299575	5.21494e-91	1.44516e-86	ubiquitin-conjugating enzyme E2L 3b [Source:ZFIN;Acc:ZDB-GENE-030131-662]	GO:0000151(ubiquitin ligase complex);GO:0000166(nucleotide binding);GO:0005524(ATP binding);GO:0006511(ubiquitin-dependent protein catabolic process);GO:0016567(protein ubiquitination);GO:0016740(transferase activity);GO:0031625(ubiquitin protein ligase binding);GO:0061631(ubiquitin conjugating enzyme activity)	04120(Ubiquitin mediated proteolysis)	K04552	EC:2.3.2.23
2	ENSDARG00000026183	polr2eb	0.951477	0.749501	0.344238	5.55049e-91	1.53815e-86	polymerase (RNA) II (DNA directed) polypeptide E, b [Source:ZFIN;Acc:ZDB-GENE-040801-83]	GO:0001054(RNA polymerase I activity);GO:0001055(RNA polymerase II activity);GO:0001056(RNA polymerase III activity);GO:0003677(DNA binding);GO:0003899(DNA-directed 5'-3' RNA polymerase activity);GO:0005634(nucleus);GO:0005665(RNA polymerase II, core complex);GO:0005666(RNA polymerase III complex);GO:0005736(RNA polymerase I complex);GO:0006351(transcription, DNA-templated);GO:0006360(transcripti…	03020(RNA polymerase);04623(Cytosolic DNA-sensing pathway)	K03013	NA
2	ENSDARG00000097691	pclaf	2.13767	1.19521	0.838776	5.61981e-91	1.55736e-86	PCNA clamp associated factor [Source:ZFIN;Acc:ZDB-GENE-131127-543]	GO:0006974(cellular response to DNA damage stimulus);GO:0051726(regulation of cell cycle)	NA	NA	NA
2	ENSDARG00000003287	wdr12	0.45378	0.372049	0.286501	7.60359e-91	2.10711e-86	WD repeat domain 12 [Source:ZFIN;Acc:ZDB-GENE-030131-371]	GO:0000463(maturation of LSU-rRNA from tricistronic rRNA transcript (SSU-rRNA, 5.8S rRNA, LSU-rRNA));GO:0000466(maturation of 5.8S rRNA from tricistronic rRNA transcript (SSU-rRNA, 5.8S rRNA, LSU-rRNA));GO:0005515(protein binding);GO:0005634(nucleus);GO:0005654(nucleoplasm);GO:0005730(nucleolus);GO:0006364(rRNA processing);GO:0008283(cell population proliferation);GO:0030687(preribosome, large su…	NA	K14863	NA
2	ENSDARG00000100366	si:dkey-102m7.3	1.03288	0.850114	0.28095	7.78876e-91	2.15842e-86	si:dkey-102m7.3 [Source:ZFIN;Acc:ZDB-GENE-091204-389]	NA	NA	NA	NA
2	ENSDARG00000037009	banf1	2.68353	1.61802	0.729902	7.94534e-91	2.20181e-86	barrier to autointegration factor 1 [Source:ZFIN;Acc:ZDB-GENE-030131-6657]	GO:0003677(DNA binding);GO:0005634(nucleus);GO:0005694(chromosome)	NA	K21870	NA
2	ENSDARG00000006300	psmd9	0.456259	0.377354	0.273935	8.17815e-91	2.26633e-86	proteasome 26S subunit, non-ATPase 9 [Source:ZFIN;Acc:ZDB-GENE-030131-431]	GO:0005515(protein binding);GO:0005634(nucleus);GO:0005737(cytoplasm);GO:0008540(proteasome regulatory particle, base subcomplex);GO:0070682(proteasome regulatory particle assembly)	NA	K06693	NA
2	ENSDARG00000014499	nutf2l	2.09103	1.37305	0.606837	8.37335e-91	2.32042e-86	nuclear transport factor 2, like [Source:ZFIN;Acc:ZDB-GENE-020416-1]	GO:0006606(protein import into nucleus);GO:0006913(nucleocytoplasmic transport);GO:0008565(protein transporter activity);GO:0044613(nuclear pore central transport channel)	NA	NA	NA
2	ENSDARG00000010194	eif4bb	2.55653	1.72272	0.569495	1.09651e-90	3.03866e-86	eukaryotic translation initiation factor 4Bb [Source:ZFIN;Acc:ZDB-GENE-030131-8563]	GO:0001731(formation of translation preinitiation complex);GO:0002181(cytoplasmic translation);GO:0003676(nucleic acid binding);GO:0003723(RNA binding);GO:0003743(translation initiation factor activity);GO:0005844(polysome);GO:0006413(translational initiation);GO:0033592(RNA strand annealing activity);GO:0034057(RNA strand-exchange activity);GO:0043024(ribosomal small subunit binding);GO:0097010(…	03013(RNA transport);04150(mTOR signaling pathway)	K03258	NA
2	ENSDARG00000045814	samm50	0.377484	0.313489	0.267999	1.12946e-90	3.12997e-86	SAMM50 sorting and assembly machinery component [Source:ZFIN;Acc:ZDB-GENE-040426-806]	GO:0019867(outer membrane)	NA	K07277	NA
2	ENSDARG00000045153	slc16a8	0.53381	0.41673	0.357214	1.18275e-90	3.27763e-86	solute carrier family 16 (monocarboxylate transporter), member 8 [Source:ZFIN;Acc:ZDB-GENE-121128-1]	GO:0005887(integral component of plasma membrane);GO:0008028(monocarboxylic acid transmembrane transporter activity);GO:0015129(lactate transmembrane transporter activity);GO:0015718(monocarboxylic acid transport);GO:0016020(membrane);GO:0016021(integral component of membrane);GO:0035873(lactate transmembrane transport);GO:0055085(transmembrane transport)	NA	K08185	NA
2	ENSDARG00000033597	api5	0.915132	0.70509	0.376171	1.284e-90	3.55823e-86	apoptosis inhibitor 5 [Source:ZFIN;Acc:ZDB-GENE-030131-395]	GO:0005634(nucleus);GO:0043066(negative regulation of apoptotic process)	NA	NA	NA
2	ENSDARG00000044125	txn	7.60372	2.85658	1.41241	1.35133e-90	3.74481e-86	thioredoxin [Source:ZFIN;Acc:ZDB-GENE-040718-162]	GO:0005623(cell);GO:0006662(glycerol ether metabolic process);GO:0015035(protein disulfide oxidoreductase activity);GO:0045454(cell redox homeostasis);GO:0055114(oxidation-reduction process)	04621(NOD-like receptor signaling pathway)	K03671	NA
2	ENSDARG00000025789	chd4b	1.28465	1.05178	0.288542	1.4823e-90	4.10776e-86	chromodomain helicase DNA binding protein 4b [Source:ZFIN;Acc:ZDB-GENE-030131-4532]	GO:0005524(ATP binding);GO:0005634(nucleus);GO:0046872(metal ion binding)	NA	K11643	EC:3.6.4.12
2	ENSDARG00000004261	tmed9	0.89427	0.657571	0.443563	1.71347e-90	4.74837e-86	transmembrane p24 trafficking protein 9 [Source:ZFIN;Acc:ZDB-GENE-050417-434]	GO:0003674(molecular_function);GO:0005783(endoplasmic reticulum);GO:0005789(endoplasmic reticulum membrane);GO:0005793(endoplasmic reticulum-Golgi intermediate compartment);GO:0005794(Golgi apparatus);GO:0006886(intracellular protein transport);GO:0006888(endoplasmic reticulum to Golgi vesicle-mediated transport);GO:0007030(Golgi organization);GO:0016020(membrane);GO:0016021(integral component of…	NA	K20346	NA
2	ENSDARG00000045399	cct5	4.66768	2.75803	0.759067	2.87168e-90	7.95801e-86	chaperonin containing TCP1, subunit 5 (epsilon) [Source:ZFIN;Acc:ZDB-GENE-030131-977]	GO:0000166(nucleotide binding);GO:0005524(ATP binding);GO:0005737(cytoplasm);GO:0005832(chaperonin-containing T-complex);GO:0006457(protein folding);GO:0030240(skeletal muscle thin filament assembly);GO:0051082(unfolded protein binding)	NA	K09497	NA
2	ENSDARG00000104031	mrpl33	0.799036	0.65326	0.290603	4.6026e-90	1.27547e-85	mitochondrial ribosomal protein L33 [Source:ZFIN;Acc:ZDB-GENE-040914-42]	GO:0003735(structural constituent of ribosome);GO:0005622(intracellular);GO:0005840(ribosome);GO:0006412(translation)	03010(Ribosome)	K02913	NA
2	ENSDARG00000051986	ndufs8a	0.890899	0.688653	0.371485	4.82171e-90	1.33619e-85	NADH:ubiquinone oxidoreductase core subunit S8a [Source:ZFIN;Acc:ZDB-GENE-040426-2153]	GO:0003954(NADH dehydrogenase activity);GO:0005747(mitochondrial respiratory chain complex I);GO:0006120(mitochondrial electron transport, NADH to ubiquinone);GO:0009060(aerobic respiration);GO:0016020(membrane);GO:0016651(oxidoreductase activity, acting on NAD(P)H);GO:0032981(mitochondrial respiratory chain complex I assembly);GO:0051539(4 iron, 4 sulfur cluster binding);GO:0055114(oxidation-red…	00190(Oxidative phosphorylation)	K03941	1.6.99.3;EC:7.1.1.2
2	ENSDARG00000020015	mrps33	0.514154	0.411866	0.320025	7.43456e-90	2.06027e-85	mitochondrial ribosomal protein S33 [Source:ZFIN;Acc:ZDB-GENE-040715-6]	GO:0005840(ribosome)	NA	K17411	NA
2	ENSDARG00000016855	sf3b5	0.474746	0.37806	0.328541	7.60579e-90	2.10772e-85	splicing factor 3b, subunit 5 [Source:ZFIN;Acc:ZDB-GENE-040718-181]	GO:0000398(mRNA splicing, via spliceosome);GO:0003723(RNA binding);GO:0005634(nucleus);GO:0005681(spliceosomal complex);GO:0005686(U2 snRNP);GO:0006397(mRNA processing);GO:0008380(RNA splicing);GO:0071011(precatalytic spliceosome)	03040(Spliceosome)	K12832	NA
2	ENSDARG00000036299	nucb2a	1.0227	0.772589	0.404605	9.95588e-90	2.75897e-85	nucleobindin 2a [Source:ZFIN;Acc:ZDB-GENE-030826-14]	GO:0005509(calcium ion binding);GO:0032094(response to food);GO:0032099(negative regulation of appetite)	NA	K20371	NA
2	ENSDARG00000004757	ybx1	21.3649	14.7985	0.529792	1.16499e-89	3.22843e-85	Y box binding protein 1 [Source:ZFIN;Acc:ZDB-GENE-000629-3]	GO:0003676(nucleic acid binding);GO:0003723(RNA binding);GO:0005634(nucleus);GO:0008190(eukaryotic initiation factor 4E binding);GO:0045947(negative regulation of translational initiation);GO:0048025(negative regulation of mRNA splicing, via spliceosome);GO:0050686(negative regulation of mRNA processing);GO:0051236(establishment of RNA localization);GO:1900364(negative regulation of mRNA polyaden…	NA	K09276	NA
2	ENSDARG00000098334	exosc3	0.768215	0.611691	0.328708	1.17788e-89	3.26414e-85	exosome component 3 [Source:ZFIN;Acc:ZDB-GENE-050706-140]	GO:0000176(nuclear exosome (RNase complex));GO:0000177(cytoplasmic exosome (RNase complex));GO:0000178(exosome (RNase complex));GO:0000467(exonucleolytic trimming to generate mature 3'-end of 5.8S rRNA from tricistronic rRNA transcript (SSU-rRNA, 5.8S rRNA, LSU-rRNA));GO:0003723(RNA binding);GO:0007409(axonogenesis);GO:0007420(brain development);GO:0021693(cerebellar Purkinje cell layer structura…	03018(RNA degradation)	K03681	NA
2	ENSDARG00000011079	wdr3	0.523054	0.430837	0.279815	1.22951e-89	3.40721e-85	WD repeat domain 3 [Source:ZFIN;Acc:ZDB-GENE-030131-9830]	GO:0005515(protein binding);GO:0032040(small-subunit processome);GO:0034388(Pwp2p-containing subcomplex of 90S preribosome)	03008(Ribosome biogenesis in eukaryotes)	K14556	NA
2	ENSDARG00000030278	idh3a	0.613704	0.500064	0.295429	1.31362e-89	3.64031e-85	isocitrate dehydrogenase 3 (NAD+) alpha [Source:ZFIN;Acc:ZDB-GENE-040426-1007]	GO:0000287(magnesium ion binding);GO:0004449(isocitrate dehydrogenase (NAD+) activity);GO:0005739(mitochondrion);GO:0006099(tricarboxylic acid cycle);GO:0016616(oxidoreductase activity, acting on the CH-OH group of donors, NAD or NADP as acceptor);GO:0051287(NAD binding);GO:0055114(oxidation-reduction process)	00020(Citrate cycle (TCA cycle))	K00030	EC:1.1.1.41
2	ENSDARG00000034396	mars	0.42469	0.353642	0.264117	1.40924e-89	3.90529e-85	methionyl-tRNA synthetase [Source:ZFIN;Acc:ZDB-GENE-030219-83]	GO:0000166(nucleotide binding);GO:0004812(aminoacyl-tRNA ligase activity);GO:0004825(methionine-tRNA ligase activity);GO:0005515(protein binding);GO:0005524(ATP binding);GO:0005829(cytosol);GO:0006412(translation);GO:0006418(tRNA aminoacylation for protein translation);GO:0006431(methionyl-tRNA aminoacylation);GO:0016874(ligase activity)	00450(Selenocompound metabolism);00970(Aminoacyl-tRNA biosynthesis)	K01874	EC:6.1.1.10
2	ENSDARG00000040076	pycard	1.47129	1.00469	0.550332	1.47844e-89	4.09706e-85	PYD and CARD domain containing [Source:ZFIN;Acc:ZDB-GENE-000511-2]	GO:0004197(cysteine-type endopeptidase activity);GO:0006508(proteolysis);GO:0006954(inflammatory response);GO:0042981(regulation of apoptotic process);GO:0045087(innate immune response)	04217(Necroptosis);04621(NOD-like receptor signaling pathway);04623(Cytosolic DNA-sensing pathway);04625(C-type lectin receptor signaling pathway);05132(Salmonella infection)	K12799	NA
2	ENSDARG00000018574	sf3b4	0.402031	0.331876	0.276662	1.58135e-89	4.38225e-85	splicing factor 3b, subunit 4 [Source:ZFIN;Acc:ZDB-GENE-020419-22]	GO:0003676(nucleic acid binding);GO:0003723(RNA binding);GO:0005681(spliceosomal complex);GO:0005689(U12-type spliceosomal complex);GO:0005730(nucleolus);GO:0048026(positive regulation of mRNA splicing, via spliceosome);GO:1990904(ribonucleoprotein complex)	03040(Spliceosome)	K12831	NA
2	ENSDARG00000096003	atp5md	2.15918	1.40973	0.615062	1.58718e-89	4.39838e-85	ATP synthase membrane subunit DAPIT [Source:ZFIN;Acc:ZDB-GENE-110914-234]	GO:0005753(mitochondrial proton-transporting ATP synthase complex);GO:0016020(membrane);GO:0016021(integral component of membrane)	NA	K18194	NA
2	ENSDARG00000038882	smc4	0.756198	0.577651	0.388567	1.67286e-89	4.63582e-85	structural maintenance of chromosomes 4 [Source:ZFIN;Acc:ZDB-GENE-020419-21]	GO:0005515(protein binding);GO:0005524(ATP binding);GO:0005634(nucleus);GO:0005694(chromosome);GO:0051276(chromosome organization)	NA	K06675	NA
2	ENSDARG00000011553	atp5pb	4.47253	2.63447	0.763576	1.72155e-89	4.77077e-85	ATP synthase peripheral stalk-membrane subunit b [Source:ZFIN;Acc:ZDB-GENE-041010-33]	GO:0000276(mitochondrial proton-transporting ATP synthase complex, coupling factor F(o));GO:0015078(proton transmembrane transporter activity);GO:0015986(ATP synthesis coupled proton transport);GO:0046933(proton-transporting ATP synthase activity, rotational mechanism);GO:0099132(ATP hydrolysis coupled cation transmembrane transport)	00190(Oxidative phosphorylation)	K02127	NA
2	ENSDARG00000043970	lrpprc	0.433802	0.357772	0.277996	1.84393e-89	5.10989e-85	leucine-rich pentatricopeptide repeat containing [Source:ZFIN;Acc:ZDB-GENE-030131-7887]	GO:0005515(protein binding)	NA	K17964	NA
2	ENSDARG00000004754	hspa4a	1.02466	0.792465	0.370732	1.97841e-89	5.48258e-85	heat shock protein 4a [Source:ZFIN;Acc:ZDB-GENE-040426-2832]	GO:0000166(nucleotide binding);GO:0005524(ATP binding);GO:0005634(nucleus);GO:0005829(cytosol)	04530(Tight junction)	K09489	NA
2	ENSDARG00000034313	ppp5c	0.524112	0.425447	0.300897	2.03783e-89	5.64722e-85	protein phosphatase 5, catalytic subunit [Source:ZFIN;Acc:ZDB-GENE-050327-75]	GO:0004721(phosphoprotein phosphatase activity);GO:0004722(protein serine/threonine phosphatase activity);GO:0005515(protein binding);GO:0005634(nucleus);GO:0005829(cytosol);GO:0006470(protein dephosphorylation);GO:0016787(hydrolase activity)	04010(MAPK signaling pathway)	K04460	EC:3.1.3.16
2	ENSDARG00000015325	u2af1	1.34902	0.968419	0.478211	2.11282e-89	5.85504e-85	U2 small nuclear RNA auxiliary factor 1 [Source:ZFIN;Acc:ZDB-GENE-020419-1]	GO:0000398(mRNA splicing, via spliceosome);GO:0003676(nucleic acid binding);GO:0003723(RNA binding);GO:0005681(spliceosomal complex);GO:0030628(pre-mRNA 3'-splice site binding);GO:0046872(metal ion binding);GO:0089701(U2AF)	03040(Spliceosome)	K12836	NA
2	ENSDARG00000005254	kdelr2a	0.726646	0.553429	0.392856	2.19267e-89	6.07632e-85	KDEL (Lys-Asp-Glu-Leu) endoplasmic reticulum protein retention receptor 2a [Source:ZFIN;Acc:ZDB-GENE-030826-32]	GO:0005783(endoplasmic reticulum);GO:0005789(endoplasmic reticulum membrane);GO:0005794(Golgi apparatus);GO:0005801(cis-Golgi network);GO:0006621(protein retention in ER lumen);GO:0006888(endoplasmic reticulum to Golgi vesicle-mediated transport);GO:0015031(protein transport);GO:0016020(membrane);GO:0016021(integral component of membrane);GO:0016192(vesicle-mediated transport);GO:0046923(ER reten…	NA	K10949	NA
2	ENSDARG00000007385	cct7	4.02432	2.4078	0.741032	2.32068e-89	6.43108e-85	chaperonin containing TCP1, subunit 7 (eta) [Source:ZFIN;Acc:ZDB-GENE-020419-7]	GO:0000166(nucleotide binding);GO:0005524(ATP binding);GO:0005737(cytoplasm);GO:0005832(chaperonin-containing T-complex);GO:0006457(protein folding);GO:0051082(unfolded protein binding)	NA	K09499	NA
2	ENSDARG00000021859	erap1b	0.743523	0.580386	0.357365	2.40593e-89	6.6673e-85	endoplasmic reticulum aminopeptidase 1b [Source:ZFIN;Acc:ZDB-GENE-040426-934]	GO:0004177(aminopeptidase activity);GO:0005737(cytoplasm);GO:0005789(endoplasmic reticulum membrane);GO:0006508(proteolysis);GO:0008217(regulation of blood pressure);GO:0008233(peptidase activity);GO:0008237(metallopeptidase activity);GO:0008270(zinc ion binding);GO:0016787(hydrolase activity);GO:0019885(antigen processing and presentation of endogenous peptide antigen via MHC class I);GO:0042277…	NA	K09604	EC:3.4.11.-
2	ENSDARG00000099325	gig2i	1.20322	0.895067	0.426837	2.45925e-89	6.81507e-85	grass carp reovirus (GCRV)-induced gene 2i [Source:ZFIN;Acc:ZDB-GENE-120409-1]	GO:0003950(NAD+ ADP-ribosyltransferase activity);GO:0005737(cytoplasm);GO:0051607(defense response to virus)	NA	NA	NA
2	ENSDARG00000001940	dnajc1	0.760426	0.601546	0.338132	2.73137e-89	7.56916e-85	DnaJ (Hsp40) homolog, subfamily C, member 1 [Source:ZFIN;Acc:ZDB-GENE-061103-529]	GO:0003677(DNA binding);GO:0005634(nucleus);GO:0016020(membrane);GO:0016021(integral component of membrane)	04141(Protein processing in endoplasmic reticulum)	K09521	NA
2	ENSDARG00000008748	ube2na	1.56319	1.17359	0.413568	3.57512e-89	9.90737e-85	ubiquitin-conjugating enzyme E2Na [Source:ZFIN;Acc:ZDB-GENE-040426-2873]	GO:0000166(nucleotide binding);GO:0000209(protein polyubiquitination);GO:0005524(ATP binding);GO:0005634(nucleus);GO:0006301(postreplication repair);GO:0016740(transferase activity);GO:0042769(DNA damage response, detection of DNA damage);GO:0061631(ubiquitin conjugating enzyme activity);GO:0070534(protein K63-linked ubiquitination)	04120(Ubiquitin mediated proteolysis)	K10580	EC:2.3.2.23
2	ENSDARG00000012261	eftud2	0.527218	0.424345	0.313163	4.00877e-89	1.11091e-84	elongation factor Tu GTP binding domain containing 2 [Source:ZFIN;Acc:ZDB-GENE-040426-1569]	GO:0000398(mRNA splicing, via spliceosome);GO:0003924(GTPase activity);GO:0005525(GTP binding);GO:0005829(cytosol);GO:0030623(U5 snRNA binding);GO:0043010(camera-type eye development);GO:0045664(regulation of neuron differentiation);GO:0046540(U4/U6 x U5 tri-snRNP complex);GO:0048666(neuron development);GO:0060322(head development);GO:0071007(U2-type catalytic step 2 spliceosome);GO:1990904(ribon…	03040(Spliceosome)	K12852	NA
2	ENSDARG00000015851	pnn	1.39812	1.0497	0.413512	4.35974e-89	1.20817e-84	pinin, desmosome associated protein [Source:ZFIN;Acc:ZDB-GENE-060519-3]	GO:0014033(neural crest cell differentiation);GO:0035145(exon-exon junction complex);GO:0071013(catalytic step 2 spliceosome)	03013(RNA transport);03015(mRNA surveillance pathway)	K13114	NA
2	ENSDARG00000059075	nip7	0.774541	0.638758	0.278072	5.61785e-89	1.55682e-84	NIP7, nucleolar pre-rRNA processing protein [Source:ZFIN;Acc:ZDB-GENE-050522-256]	GO:0003723(RNA binding);GO:0005634(nucleus);GO:0005730(nucleolus);GO:0030687(preribosome, large subunit precursor);GO:0042254(ribosome biogenesis);GO:0042255(ribosome assembly);GO:0042273(ribosomal large subunit biogenesis)	NA	K07565	NA
2	ENSDARG00000101047	rtcb	0.412257	0.33989	0.278474	5.67118e-89	1.5716e-84	RNA 2',3'-cyclic phosphate and 5'-OH ligase [Source:ZFIN;Acc:ZDB-GENE-040426-2096]	GO:0000166(nucleotide binding);GO:0000971(tRNA exon ligation utilizing 2',3' cyclic phosphate of 5'-exon as source of linkage phosphate);GO:0003972(RNA ligase (ATP) activity);GO:0005524(ATP binding);GO:0005634(nucleus);GO:0005737(cytoplasm);GO:0006388(tRNA splicing, via endonucleolytic cleavage and ligation);GO:0006396(RNA processing);GO:0008033(tRNA processing);GO:0008452(RNA ligase activity);GO…	NA	K14415	EC:6.5.1.8
2	ENSDARG00000020618	gatd3a	0.595602	0.480693	0.309233	6.38623e-89	1.76975e-84	glutamine amidotransferase like class 1 domain containing 3A [Source:ZFIN;Acc:ZDB-GENE-050417-147]	GO:0003674(molecular_function);GO:0005739(mitochondrion);GO:0008150(biological_process)	NA	NA	NA
2	ENSDARG00000099664	selenof	2.56393	1.53711	0.738131	8.06134e-89	2.23396e-84	selenoprotein F [Source:ZFIN;Acc:ZDB-GENE-030327-1]	GO:0005783(endoplasmic reticulum);GO:0005788(endoplasmic reticulum lumen);GO:0008430(selenium binding)	NA	NA	NA
2	ENSDARG00000031293	dnajc9	0.660096	0.510187	0.371649	8.9418e-89	2.47795e-84	DnaJ (Hsp40) homolog, subfamily C, member 9 [Source:ZFIN;Acc:ZDB-GENE-040718-130]	GO:0005575(cellular_component);GO:0005634(nucleus);GO:0005737(cytoplasm);GO:0031072(heat shock protein binding)	NA	K09529	NA
2	ENSDARG00000042823	spcs2	1.78779	1.22797	0.541894	9.27444e-89	2.57013e-84	signal peptidase complex subunit 2 [Source:ZFIN;Acc:ZDB-GENE-050320-32]	GO:0005787(signal peptidase complex);GO:0006465(signal peptide processing);GO:0008233(peptidase activity);GO:0016020(membrane);GO:0016021(integral component of membrane)	03060(Protein export)	K12947	EC:3.4.-.-
2	ENSDARG00000016864	farsb	0.584765	0.485288	0.269016	9.39173e-89	2.60264e-84	phenylalanyl-tRNA synthetase subunit beta [Source:ZFIN;Acc:ZDB-GENE-021206-2]	GO:0000166(nucleotide binding);GO:0000287(magnesium ion binding);GO:0003723(RNA binding);GO:0004826(phenylalanine-tRNA ligase activity);GO:0005524(ATP binding);GO:0005737(cytoplasm);GO:0006432(phenylalanyl-tRNA aminoacylation);GO:0009328(phenylalanine-tRNA ligase complex)	00970(Aminoacyl-tRNA biosynthesis)	K01890	EC:6.1.1.20
2	ENSDARG00000020301	os9	0.87836	0.640834	0.454863	9.64347e-89	2.6724e-84	osteosarcoma amplified 9, endoplasmic reticulum lectin [Source:ZFIN;Acc:ZDB-GENE-060929-32]	GO:0005788(endoplasmic reticulum lumen);GO:0016020(membrane);GO:0016021(integral component of membrane);GO:0030433(ubiquitin-dependent ERAD pathway);GO:0030970(retrograde protein transport, ER to cytosol)	04141(Protein processing in endoplasmic reticulum)	K10088	NA
2	ENSDARG00000089976	spcs3	4.26476	2.12981	1.00174	9.6712e-89	2.68008e-84	signal peptidase complex subunit 3 [Source:ZFIN;Acc:ZDB-GENE-040426-2206]	GO:0005783(endoplasmic reticulum);GO:0005787(signal peptidase complex);GO:0005789(endoplasmic reticulum membrane);GO:0006465(signal peptide processing);GO:0008233(peptidase activity);GO:0016020(membrane);GO:0016021(integral component of membrane);GO:0045047(protein targeting to ER)	03060(Protein export)	K12948	EC:3.4.-.-
2	ENSDARG00000036791	dnmt3bb.1	0.398539	0.328071	0.280714	1.07055e-88	2.9667e-84	DNA (cytosine-5-)-methyltransferase 3 beta, duplicate b.1 [Source:ZFIN;Acc:ZDB-GENE-050314-1]	GO:0006306(DNA methylation);GO:0007368(determination of left/right symmetry);GO:0008168(methyltransferase activity);GO:0009008(DNA-methyltransferase activity);GO:0010424(DNA methylation on cytosine within a CG sequence);GO:0010468(regulation of gene expression);GO:0016740(transferase activity);GO:0032259(methylation);GO:0061484(hematopoietic stem cell homeostasis);GO:1902036(regulation of hematop…	00270(Cysteine and methionine metabolism)	K17399	EC:2.1.1.37
2	ENSDARG00000044807	dck	0.781334	0.584571	0.418561	1.1345e-88	3.14392e-84	deoxycytidine kinase [Source:ZFIN;Acc:ZDB-GENE-041024-3]	GO:0000166(nucleotide binding);GO:0004137(deoxycytidine kinase activity);GO:0005524(ATP binding);GO:0005575(cellular_component);GO:0005737(cytoplasm);GO:0006139(nucleobase-containing compound metabolic process);GO:0009157(deoxyribonucleoside monophosphate biosynthetic process);GO:0009165(nucleotide biosynthetic process);GO:0019136(deoxynucleoside kinase activity);GO:0019206(nucleoside kinase acti…	00230(Purine metabolism);00240(Pyrimidine metabolism)	K00893	EC:2.7.1.74
2	ENSDARG00000069920	cox17	2.00838	1.37406	0.547585	1.30617e-88	3.61966e-84	cytochrome c oxidase copper chaperone COX17 [Source:ZFIN;Acc:ZDB-GENE-040912-91]	GO:0005507(copper ion binding);GO:0005758(mitochondrial intermembrane space);GO:0006825(copper ion transport);GO:0016531(copper chaperone activity);GO:0033617(mitochondrial respiratory chain complex IV assembly);GO:0046688(response to copper ion)	00190(Oxidative phosphorylation)	K02260	NA
2	ENSDARG00000005840	got2b	1.81113	1.22476	0.564382	1.54201e-88	4.27323e-84	glutamic-oxaloacetic transaminase 2b, mitochondrial [Source:ZFIN;Acc:ZDB-GENE-030131-7917]	GO:0003824(catalytic activity);GO:0004069(L-aspartate:2-oxoglutarate aminotransferase activity);GO:0005739(mitochondrion);GO:0006520(cellular amino acid metabolic process);GO:0006533(aspartate catabolic process);GO:0008483(transaminase activity);GO:0009058(biosynthetic process);GO:0016740(transferase activity);GO:0030170(pyridoxal phosphate binding)	00220(Arginine biosynthesis);00250(Alanine, aspartate and glutamate metabolism);00270(Cysteine and methionine metabolism);00330(Arginine and proline metabolism);00350(Tyrosine metabolism);00360(Phenylalanine metabolism);00400(Phenylalanine, tyrosine and tryptophan biosynthesis)	K14455	EC:2.6.1.1
2	ENSDARG00000068886	mrpl14	0.443193	0.365076	0.279737	1.59299e-88	4.41449e-84	mitochondrial ribosomal protein L14 [Source:ZFIN;Acc:ZDB-GENE-040426-1066]	GO:0003735(structural constituent of ribosome);GO:0005739(mitochondrion);GO:0005762(mitochondrial large ribosomal subunit);GO:0005840(ribosome);GO:0006412(translation)	03010(Ribosome)	K02874	NA
2	ENSDARG00000012987	gpia	1.25997	1.00596	0.324821	2.27551e-88	6.30589e-84	glucose-6-phosphate isomerase a [Source:ZFIN;Acc:ZDB-GENE-020513-2]	GO:0004347(glucose-6-phosphate isomerase activity);GO:0005829(cytosol);GO:0006094(gluconeogenesis);GO:0006096(glycolytic process);GO:0016853(isomerase activity);GO:0016866(intramolecular transferase activity);GO:0048029(monosaccharide binding);GO:0051156(glucose 6-phosphate metabolic process)	00010(Glycolysis / Gluconeogenesis);00030(Pentose phosphate pathway);00500(Starch and sucrose metabolism);00520(Amino sugar and nucleotide sugar metabolism)	K01810	EC:5.3.1.9
2	ENSDARG00000015628	psmd10	1.64451	1.13412	0.536085	3.47692e-88	9.63524e-84	proteasome 26S subunit, non-ATPase 10 [Source:ZFIN;Acc:ZDB-GENE-050112-1]	GO:0000502(proteasome complex);GO:0005515(protein binding);GO:0005737(cytoplasm);GO:0042127(regulation of cell population proliferation);GO:0042981(regulation of apoptotic process);GO:0055088(lipid homeostasis);GO:0070682(proteasome regulatory particle assembly)	NA	K06694	NA
2	ENSDARG00000090389	ndufv3	0.640002	0.523351	0.290299	3.90068e-88	1.08096e-83	NADH:ubiquinone oxidoreductase subunit V3 [Source:ZFIN;Acc:ZDB-GENE-030131-6500]	GO:0005739(mitochondrion);GO:0005747(mitochondrial respiratory chain complex I)	00190(Oxidative phosphorylation)	K03944	NA
2	ENSDARG00000075743	mrpl47	0.591881	0.47068	0.33056	4.56264e-88	1.2644e-83	mitochondrial ribosomal protein L47 [Source:ZFIN;Acc:ZDB-GENE-030219-177]	GO:0003735(structural constituent of ribosome);GO:0005622(intracellular);GO:0005761(mitochondrial ribosome);GO:0005762(mitochondrial large ribosomal subunit);GO:0005840(ribosome);GO:0006412(translation);GO:0032543(mitochondrial translation)	NA	K17428	NA
2	ENSDARG00000045308	pola1	0.482246	0.393946	0.291772	4.61308e-88	1.27838e-83	polymerase (DNA directed), alpha 1 [Source:ZFIN;Acc:ZDB-GENE-030114-9]	GO:0000166(nucleotide binding);GO:0001882(nucleoside binding);GO:0003676(nucleic acid binding);GO:0003677(DNA binding);GO:0003688(DNA replication origin binding);GO:0003887(DNA-directed DNA polymerase activity);GO:0005634(nucleus);GO:0005658(alpha DNA polymerase:primase complex);GO:0006260(DNA replication);GO:0006272(leading strand elongation);GO:0006273(lagging strand elongation);GO:0006303(doub…	03030(DNA replication)	K02320	EC:2.7.7.7
2	ENSDARG00000103101	si:ch211-235e9.6	0.480771	0.392083	0.294193	5.36479e-88	1.48669e-83	si:ch211-235e9.6 [Source:ZFIN;Acc:ZDB-GENE-141216-417]	GO:0005739(mitochondrion);GO:0005747(mitochondrial respiratory chain complex I)	00190(Oxidative phosphorylation)	K03967	NA
2	ENSDARG00000025889	usp14	0.60198	0.480034	0.326578	5.8719e-88	1.62722e-83	ubiquitin specific peptidase 14 (tRNA-guanine transglycosylase) [Source:ZFIN;Acc:ZDB-GENE-030131-7676]	GO:0005515(protein binding);GO:0006511(ubiquitin-dependent protein catabolic process);GO:0016579(protein deubiquitination);GO:0036459(thiol-dependent ubiquitinyl hydrolase activity)	NA	K11843	EC:3.4.19.12
2	ENSDARG00000060594	hadhab	0.48932	0.397432	0.300072	6.96169e-88	1.92922e-83	hydroxyacyl-CoA dehydrogenase trifunctional multienzyme complex subunit alpha b [Source:ZFIN;Acc:ZDB-GENE-041111-204]	GO:0003824(catalytic activity);GO:0003857(3-hydroxyacyl-CoA dehydrogenase activity);GO:0004300(enoyl-CoA hydratase activity);GO:0005739(mitochondrion);GO:0006631(fatty acid metabolic process);GO:0006635(fatty acid beta-oxidation);GO:0016491(oxidoreductase activity);GO:0016507(mitochondrial fatty acid beta-oxidation multienzyme complex);GO:0016509(long-chain-3-hydroxyacyl-CoA dehydrogenase activit…	00062(Fatty acid elongation);00071(Fatty acid degradation);00280(Valine, leucine and isoleucine degradation);00310(Lysine degradation);00380(Tryptophan metabolism);00410(beta-Alanine metabolism);00640(Propanoate metabolism);00650(Butanoate metabolism)	K07515	1.1.1.211;EC:4.2.1.17
2	ENSDARG00000054063	arpc4	1.8581	1.34137	0.470117	1.51985e-87	4.21181e-83	actin related protein 2/3 complex, subunit 4 [Source:ZFIN;Acc:ZDB-GENE-010724-9]	GO:0003779(actin binding);GO:0005737(cytoplasm);GO:0005856(cytoskeleton);GO:0005885(Arp2/3 protein complex);GO:0015629(actin cytoskeleton);GO:0030041(actin filament polymerization);GO:0030833(regulation of actin filament polymerization);GO:0034314(Arp2/3 complex-mediated actin nucleation)	04144(Endocytosis);04810(Regulation of actin cytoskeleton);05132(Salmonella infection)	K05755	NA
2	ENSDARG00000101061	eif2a	0.536813	0.444445	0.272413	1.6339e-87	4.52786e-83	eukaryotic translation initiation factor 2A [Source:ZFIN;Acc:ZDB-GENE-050626-52]	GO:0003743(translation initiation factor activity);GO:0005515(protein binding);GO:0006412(translation);GO:0006413(translational initiation);GO:0006417(regulation of translation)	NA	K15026	NA
2	ENSDARG00000001788	atp5po	3.143	1.9826	0.66475	1.65154e-87	4.57676e-83	ATP synthase peripheral stalk subunit OSCP [Source:ZFIN;Acc:ZDB-GENE-050522-147]	GO:0015986(ATP synthesis coupled proton transport);GO:0046933(proton-transporting ATP synthase activity, rotational mechanism);GO:0099132(ATP hydrolysis coupled cation transmembrane transport)	00190(Oxidative phosphorylation)	K02137	NA
2	ENSDARG00000102746	tmem39a	0.595634	0.48204	0.305272	2.08151e-87	5.76828e-83	transmembrane protein 39A [Source:ZFIN;Acc:ZDB-GENE-030131-1928]	GO:0016020(membrane);GO:0016021(integral component of membrane)	NA	NA	NA
2	ENSDARG00000045490	ndufb2	1.41847	1.01371	0.484684	2.56561e-87	7.10982e-83	NADH:ubiquinone oxidoreductase subunit B2 [Source:ZFIN;Acc:ZDB-GENE-040426-1762]	GO:0003674(molecular_function);GO:0005743(mitochondrial inner membrane);GO:0005747(mitochondrial respiratory chain complex I);GO:0008150(biological_process);GO:0016020(membrane);GO:0016021(integral component of membrane)	00190(Oxidative phosphorylation)	K03958	NA
2	ENSDARG00000054799	rpl9	0.467235	0.378983	0.302016	3.57147e-87	9.89727e-83	ribosomal protein L9 [Source:ZFIN;Acc:ZDB-GENE-030131-8646]	GO:0000166(nucleotide binding);GO:0002181(cytoplasmic translation);GO:0003677(DNA binding);GO:0003689(DNA clamp loader activity);GO:0003735(structural constituent of ribosome);GO:0005524(ATP binding);GO:0005622(intracellular);GO:0005634(nucleus);GO:0005663(DNA replication factor C complex);GO:0005840(ribosome);GO:0006260(DNA replication);GO:0006281(DNA repair);GO:0006412(translation);GO:0019843(r…	03030(DNA replication);03420(Nucleotide excision repair);03430(Mismatch repair)	K10754	NA
2	ENSDARG00000003795	idh2	3.1357	1.98144	0.662241	5.12711e-87	1.42083e-82	isocitrate dehydrogenase 2 (NADP+), mitochondrial [Source:ZFIN;Acc:ZDB-GENE-031118-95]	GO:0000287(magnesium ion binding);GO:0004450(isocitrate dehydrogenase (NADP+) activity);GO:0006102(isocitrate metabolic process);GO:0016616(oxidoreductase activity, acting on the CH-OH group of donors, NAD or NADP as acceptor);GO:0051287(NAD binding);GO:0055114(oxidation-reduction process)	00020(Citrate cycle (TCA cycle));00480(Glutathione metabolism);04146(Peroxisome)	K00031	EC:1.1.1.42
2	ENSDARG00000029445	zgc:56676	1.92715	1.36364	0.499001	7.35935e-87	2.03942e-82	zgc:56676 [Source:ZFIN;Acc:ZDB-GENE-040426-1109]	GO:0003723(RNA binding);GO:0003743(translation initiation factor activity);GO:0005575(cellular_component);GO:0006413(translational initiation);GO:0016282(eukaryotic 43S preinitiation complex);GO:0043024(ribosomal small subunit binding)	03013(RNA transport)	K03113	NA
2	ENSDARG00000056914	emg1	0.463901	0.377946	0.295636	1.01329e-86	2.80803e-82	EMG1 N1-specific pseudouridine methyltransferase [Source:ZFIN;Acc:ZDB-GENE-060421-2909]	GO:0005730(nucleolus);GO:0008168(methyltransferase activity);GO:0019843(rRNA binding);GO:0032040(small-subunit processome);GO:0070037(rRNA (pseudouridine) methyltransferase activity);GO:0070475(rRNA base methylation)	03008(Ribosome biogenesis in eukaryotes)	K14568	EC:2.1.1.260
2	ENSDARG00000005560	ywhah	0.776481	0.626055	0.31066	1.16986e-86	3.24192e-82	tyrosine 3-monooxygenase/tryptophan 5-monooxygenase activation protein, eta polypeptide [Source:ZFIN;Acc:ZDB-GENE-040426-2191]	GO:0004497(monooxygenase activity);GO:0005575(cellular_component);GO:0019904(protein domain specific binding);GO:0055114(oxidation-reduction process)	04110(Cell cycle);04114(Oocyte meiosis)	K16198	NA
2	ENSDARG00000006963	cse1l	0.479208	0.386607	0.309784	1.31691e-86	3.64942e-82	CSE1 chromosome segregation 1-like (yeast) [Source:ZFIN;Acc:ZDB-GENE-990603-1]	GO:0005049(nuclear export signal receptor activity);GO:0005515(protein binding);GO:0005634(nucleus);GO:0005635(nuclear envelope);GO:0005737(cytoplasm);GO:0005829(cytosol);GO:0005886(plasma membrane);GO:0006606(protein import into nucleus);GO:0006611(protein export from nucleus);GO:0006886(intracellular protein transport);GO:0007589(body fluid secretion);GO:0008536(Ran GTPase binding);GO:0008565(p…	NA	K18423	NA
2	ENSDARG00000013804	capns1b	0.868381	0.703617	0.303538	1.93369e-86	5.35863e-82	calpain, small subunit 1 b [Source:ZFIN;Acc:ZDB-GENE-030131-5206]	GO:0005509(calcium ion binding)	NA	K08583	NA
2	ENSDARG00000075709	ndufb3	1.69754	1.21262	0.485314	1.97924e-86	5.48488e-82	NADH:ubiquinone oxidoreductase subunit B3 [Source:ZFIN;Acc:ZDB-GENE-091204-407]	GO:0005739(mitochondrion);GO:0005747(mitochondrial respiratory chain complex I);GO:0022900(electron transport chain);GO:0032981(mitochondrial respiratory chain complex I assembly)	00190(Oxidative phosphorylation)	K03959	NA
2	ENSDARG00000091150	mki67	3.45664	1.8314	0.916425	2.06331e-86	5.71783e-82	marker of proliferation Ki-67 [Source:ZFIN;Acc:ZDB-GENE-030131-9771]	GO:0005515(protein binding)	NA	K17582	NA
2	ENSDARG00000089626	ptges3b	2.69405	1.75265	0.620235	2.41546e-86	6.69372e-82	prostaglandin E synthase 3b (cytosolic) [Source:ZFIN;Acc:ZDB-GENE-040625-144]	GO:0003674(molecular_function);GO:0005575(cellular_component);GO:0005634(nucleus);GO:0005737(cytoplasm);GO:0005829(cytosol);GO:0006457(protein folding);GO:0008150(biological_process);GO:0051087(chaperone binding);GO:0051131(chaperone-mediated protein complex assembly);GO:0051879(Hsp90 protein binding)	00590(Arachidonic acid metabolism)	K15730	EC:5.3.99.3
2	ENSDARG00000024877	ptgr1	0.694828	0.529983	0.390709	2.70966e-86	7.509e-82	prostaglandin reductase 1 [Source:ZFIN;Acc:ZDB-GENE-041212-80]	GO:0005737(cytoplasm);GO:0016491(oxidoreductase activity);GO:0032440(2-alkenal reductase [NAD(P)] activity);GO:0047522(15-oxoprostaglandin 13-oxidase activity);GO:0055114(oxidation-reduction process)	NA	K13948	1.3.1.48;EC:1.3.1.74
2	ENSDARG00000037559	uba1	1.78151	1.39101	0.356973	3.3775e-86	9.35974e-82	ubiquitin-like modifier activating enzyme 1 [Source:ZFIN;Acc:ZDB-GENE-040426-2009]	GO:0000166(nucleotide binding);GO:0004839(ubiquitin activating enzyme activity);GO:0005524(ATP binding);GO:0005634(nucleus);GO:0005737(cytoplasm);GO:0006464(cellular protein modification process);GO:0006974(cellular response to DNA damage stimulus);GO:0007409(axonogenesis);GO:0008641(ubiquitin-like modifier activating enzyme activity);GO:0016567(protein ubiquitination);GO:0016874(ligase activity)…	04120(Ubiquitin mediated proteolysis)	K03178	EC:6.2.1.45
2	ENSDARG00000014222	zgc:86598	0.553142	0.45456	0.283179	3.5817e-86	9.92561e-82	zgc:86598 [Source:ZFIN;Acc:ZDB-GENE-040625-181]	GO:0000166(nucleotide binding);GO:0004672(protein kinase activity);GO:0004674(protein serine/threonine kinase activity);GO:0005524(ATP binding);GO:0005575(cellular_component);GO:0006468(protein phosphorylation)	03008(Ribosome biogenesis in eukaryotes);04137(Mitophagy - animal);04310(Wnt signaling pathway);04520(Adherens junction)	K03097	EC:2.7.11.1
2	ENSDARG00000079402	tapbp.1	1.55342	1.15167	0.431724	6.88556e-86	1.90813e-81	TAP binding protein (tapasin), tandem duplicate 1 [Source:ZFIN;Acc:ZDB-GENE-010110-2]	GO:0003674(molecular_function);GO:0016020(membrane);GO:0019885(antigen processing and presentation of endogenous peptide antigen via MHC class I)	05168(Herpes simplex virus 1 infection)	K08058	NA
2	ENSDARG00000060494	eprs	0.509659	0.417049	0.289316	7.13749e-86	1.97794e-81	glutamyl-prolyl-tRNA synthetase [Source:ZFIN;Acc:ZDB-GENE-030131-638]	GO:0000166(nucleotide binding);GO:0004812(aminoacyl-tRNA ligase activity);GO:0004818(glutamate-tRNA ligase activity);GO:0004827(proline-tRNA ligase activity);GO:0005524(ATP binding);GO:0005737(cytoplasm);GO:0006412(translation);GO:0006418(tRNA aminoacylation for protein translation);GO:0006424(glutamyl-tRNA aminoacylation);GO:0006433(prolyl-tRNA aminoacylation);GO:0017101(aminoacyl-tRNA synthetas…	00860(Porphyrin and chlorophyll metabolism);00970(Aminoacyl-tRNA biosynthesis)	K14163	6.1.1.15;EC:6.1.1.17
2	ENSDARG00000062326	hmgn7	4.13216	2.53142	0.706947	8.1387e-86	2.2554e-81	high mobility group nucleosomal binding domain 7 [Source:ZFIN;Acc:ZDB-GENE-061215-23]	GO:0000785(chromatin);GO:0003682(chromatin binding);GO:0005634(nucleus);GO:0031492(nucleosomal DNA binding);GO:0045944(positive regulation of transcription by RNA polymerase II);GO:0061178(regulation of insulin secretion involved in cellular response to glucose stimulus)	NA	NA	NA
2	ENSDARG00000039424	snrpb2	0.497923	0.400298	0.314848	8.63588e-86	2.39317e-81	small nuclear ribonucleoprotein polypeptide B2 [Source:ZFIN;Acc:ZDB-GENE-060616-2]	GO:0000398(mRNA splicing, via spliceosome);GO:0003676(nucleic acid binding);GO:0003723(RNA binding);GO:0005685(U1 snRNP);GO:0030619(U1 snRNA binding);GO:0035614(snRNA stem-loop binding)	03040(Spliceosome)	K11094	NA
2	ENSDARG00000098228	thrap3b	2.01354	1.58975	0.340927	1.02396e-85	2.83761e-81	thyroid hormone receptor associated protein 3b [Source:ZFIN;Acc:ZDB-GENE-040516-9]	NA	NA	K13112	NA
2	ENSDARG00000028335	hmga1a	7.63812	4.25162	0.845203	1.62718e-85	4.50923e-81	high mobility group AT-hook 1a [Source:ZFIN;Acc:ZDB-GENE-010502-1]	GO:0000785(chromatin);GO:0003677(DNA binding);GO:0005634(nucleus);GO:0006355(regulation of transcription, DNA-templated);GO:0043484(regulation of RNA splicing)	NA	K09282	NA
2	ENSDARG00000022232	ppan	0.944382	0.779454	0.276906	1.82961e-85	5.07021e-81	peter pan homolog [Source:ZFIN;Acc:ZDB-GENE-030114-4]	GO:0000027(ribosomal large subunit assembly);GO:0030687(preribosome, large subunit precursor)	NA	K14859	NA
2	ENSDARG00000030913	cluha	0.465559	0.384465	0.276111	2.68337e-85	7.43616e-81	clustered mitochondria (cluA/CLU1) homolog a [Source:ZFIN;Acc:ZDB-GENE-061103-457]	GO:0003723(RNA binding);GO:0005515(protein binding);GO:0005737(cytoplasm);GO:0007005(mitochondrion organization);GO:0048312(intracellular distribution of mitochondria)	NA	K03255	NA
2	ENSDARG00000067717	tomm7	1.38166	1.11962	0.303396	3.46817e-85	9.61099e-81	translocase of outer mitochondrial membrane 7 homolog (yeast) [Source:ZFIN;Acc:ZDB-GENE-060825-115]	GO:0005742(mitochondrial outer membrane translocase complex);GO:0016020(membrane);GO:0016021(integral component of membrane);GO:0030150(protein import into mitochondrial matrix)	04137(Mitophagy - animal)	K17771	NA
2	ENSDARG00000091402	eif2b1	0.376086	0.313497	0.262612	3.73909e-85	1.03618e-80	eukaryotic translation initiation factor 2B, subunit 1 alpha [Source:ZFIN;Acc:ZDB-GENE-040625-25]	GO:0044237(cellular metabolic process)	03013(RNA transport);05168(Herpes simplex virus 1 infection)	K03239	NA
2	ENSDARG00000057855	mrps31	0.434967	0.351648	0.306773	4.22829e-85	1.17174e-80	mitochondrial ribosomal protein S31 [Source:ZFIN;Acc:ZDB-GENE-030131-3715]	GO:0003735(structural constituent of ribosome);GO:0005763(mitochondrial small ribosomal subunit)	NA	K17410	NA
2	ENSDARG00000007130	mrto4	0.452815	0.372591	0.281328	5.29372e-85	1.46699e-80	MRT4 homolog, ribosome maturation factor [Source:ZFIN;Acc:ZDB-GENE-050417-142]	GO:0000027(ribosomal large subunit assembly);GO:0000956(nuclear-transcribed mRNA catabolic process);GO:0005622(intracellular);GO:0005634(nucleus);GO:0005730(nucleolus);GO:0005737(cytoplasm);GO:0006364(rRNA processing);GO:0042254(ribosome biogenesis)	NA	K14815	NA
2	ENSDARG00000014013	lbr	1.27642	0.937456	0.445284	5.61179e-85	1.55514e-80	lamin B receptor [Source:ZFIN;Acc:ZDB-GENE-030804-11]	GO:0005637(nuclear inner membrane);GO:0016020(membrane);GO:0016021(integral component of membrane);GO:0016126(sterol biosynthetic process);GO:0016628(oxidoreductase activity, acting on the CH-CH group of donors, NAD or NADP as acceptor);GO:0042074(cell migration involved in gastrulation);GO:0055114(oxidation-reduction process)	NA	K19532	NA
2	ENSDARG00000026908	tmed2	1.91888	1.37621	0.479562	6.21824e-85	1.7232e-80	transmembrane p24 trafficking protein 2 [Source:ZFIN;Acc:ZDB-GENE-030131-269]	GO:0005783(endoplasmic reticulum);GO:0005793(endoplasmic reticulum-Golgi intermediate compartment);GO:0005794(Golgi apparatus);GO:0006886(intracellular protein transport);GO:0006888(endoplasmic reticulum to Golgi vesicle-mediated transport);GO:0007030(Golgi organization);GO:0016020(membrane);GO:0016021(integral component of membrane);GO:0030134(COPII-coated ER to Golgi transport vesicle)	NA	K20347	NA
2	ENSDARG00000054793	emc10	1.33359	0.90412	0.560735	6.67835e-85	1.8507e-80	ER membrane protein complex subunit 10 [Source:ZFIN;Acc:ZDB-GENE-030131-9045]	NA	NA	NA	NA
2	ENSDARG00000076836	gpx4b	1.97915	1.49231	0.407331	8.94224e-85	2.47807e-80	glutathione peroxidase 4b [Source:ZFIN;Acc:ZDB-GENE-030410-3]	GO:0004601(peroxidase activity);GO:0004602(glutathione peroxidase activity);GO:0005634(nucleus);GO:0005739(mitochondrion);GO:0006979(response to oxidative stress);GO:0016491(oxidoreductase activity);GO:0030178(negative regulation of Wnt signaling pathway);GO:0047066(phospholipid-hydroperoxide glutathione peroxidase activity);GO:0055114(oxidation-reduction process);GO:0098869(cellular oxidant deto…	00480(Glutathione metabolism);04216(Ferroptosis)	K05361	EC:1.11.1.12
2	ENSDARG00000042236	atrx	2.36456	1.70324	0.473291	1.14003e-84	3.15925e-80	alpha thalassemia/mental retardation syndrome X-linked homolog (human) [Source:ZFIN;Acc:ZDB-GENE-030912-11]	GO:0005524(ATP binding);GO:0046872(metal ion binding)	NA	K10779	EC:3.6.4.12
2	ENSDARG00000010481	bzw1a	1.55938	1.19868	0.379526	1.39544e-84	3.86704e-80	basic leucine zipper and W2 domains 1a [Source:ZFIN;Acc:ZDB-GENE-030131-3951]	GO:0005515(protein binding);GO:0005737(cytoplasm)	NA	NA	NA
2	ENSDARG00000070822	cnp	1.31157	1.06659	0.298292	1.50365e-84	4.16691e-80	2',3'-cyclic nucleotide 3' phosphodiesterase [Source:ZFIN;Acc:ZDB-GENE-030521-29]	GO:0004113(2',3'-cyclic-nucleotide 3'-phosphodiesterase activity);GO:0005737(cytoplasm);GO:0005829(cytosol);GO:0009214(cyclic nucleotide catabolic process);GO:0016020(membrane);GO:0031103(axon regeneration)	NA	K01121	EC:3.1.4.37
2	ENSDARG00000091656	lsm8	1.04961	0.764809	0.456688	1.66942e-84	4.62631e-80	LSM8 homolog, U6 small nuclear RNA associated [Source:ZFIN;Acc:ZDB-GENE-070629-3]	GO:0000398(mRNA splicing, via spliceosome);GO:0003723(RNA binding);GO:0005634(nucleus);GO:0005681(spliceosomal complex);GO:0005688(U6 snRNP);GO:0006397(mRNA processing);GO:0008380(RNA splicing);GO:0016070(RNA metabolic process);GO:0030217(T cell differentiation);GO:0046540(U4/U6 x U5 tri-snRNP complex)	03018(RNA degradation);03040(Spliceosome)	K12627	NA
2	ENSDARG00000014274	rfc2	0.397895	0.328919	0.274654	4.15901e-84	1.15255e-79	replication factor C (activator 1) 2 [Source:ZFIN;Acc:ZDB-GENE-050306-29]	GO:0003677(DNA binding);GO:0003689(DNA clamp loader activity);GO:0005524(ATP binding);GO:0005634(nucleus);GO:0005663(DNA replication factor C complex);GO:0006260(DNA replication);GO:0006261(DNA-dependent DNA replication)	03030(DNA replication);03420(Nucleotide excision repair);03430(Mismatch repair)	K10755	NA
2	ENSDARG00000024109	naa40.1	0.438575	0.366072	0.260694	4.90209e-84	1.35847e-79	N(alpha)-acetyltransferase 40, NatD catalytic subunit, homolog (S. cerevisiae) [Source:ZFIN;Acc:ZDB-GENE-050417-105]	GO:0005634(nucleus);GO:0005737(cytoplasm);GO:0006474(N-terminal protein amino acid acetylation);GO:0010485(H4 histone acetyltransferase activity);GO:0016740(transferase activity);GO:0016746(transferase activity, transferring acyl groups);GO:0043967(histone H4 acetylation);GO:0043968(histone H2A acetylation);GO:0043998(H2A histone acetyltransferase activity);GO:0061187(regulation of chromatin sile…	NA	K20794	EC:2.3.1.257
2	ENSDARG00000006766	snd1	1.68907	1.28635	0.392952	5.18196e-84	1.43602e-79	staphylococcal nuclease and tudor domain containing 1 [Source:ZFIN;Acc:ZDB-GENE-030131-3124]	GO:0003676(nucleic acid binding);GO:0003723(RNA binding);GO:0004518(nuclease activity);GO:0004521(endoribonuclease activity);GO:0005634(nucleus);GO:0005737(cytoplasm);GO:0006401(RNA catabolic process);GO:0016442(RISC complex);GO:0031047(gene silencing by RNA);GO:0090305(nucleic acid phosphodiester bond hydrolysis);GO:0090502(RNA phosphodiester bond hydrolysis, endonucleolytic)	NA	NA	NA
2	ENSDARG00000002967	pdap1b	0.562579	0.466768	0.26935	5.69e-84	1.57681e-79	pdgfa associated protein 1b [Source:ZFIN;Acc:ZDB-GENE-040426-942]	GO:0003674(molecular_function);GO:0005575(cellular_component);GO:0008150(biological_process)	NA	NA	NA
2	ENSDARG00000025350	prdx2	4.72691	2.8413	0.734349	7.57017e-84	2.09784e-79	peroxiredoxin 2 [Source:ZFIN;Acc:ZDB-GENE-030326-2]	GO:0005829(cytosol);GO:0006979(response to oxidative stress);GO:0008379(thioredoxin peroxidase activity);GO:0016209(antioxidant activity);GO:0016491(oxidoreductase activity);GO:0019430(removal of superoxide radicals);GO:0042744(hydrogen peroxide catabolic process);GO:0045321(leukocyte activation);GO:0045454(cell redox homeostasis);GO:0051920(peroxiredoxin activity);GO:0055114(oxidation-reduction …	NA	K03386	EC:1.11.1.15
2	ENSDARG00000101074	glud1b	1.0192	0.781843	0.382488	7.60258e-84	2.10683e-79	glutamate dehydrogenase 1b [Source:ZFIN;Acc:ZDB-GENE-030828-1]	GO:0005575(cellular_component);GO:0006520(cellular amino acid metabolic process);GO:0016491(oxidoreductase activity);GO:0016639(oxidoreductase activity, acting on the CH-NH2 group of donors, NAD or NADP as acceptor);GO:0055114(oxidation-reduction process)	00220(Arginine biosynthesis);00250(Alanine, aspartate and glutamate metabolism);00471(D-Glutamine and D-glutamate metabolism);00910(Nitrogen metabolism);04217(Necroptosis)	K00261	EC:1.4.1.3
2	ENSDARG00000024561	nolc1	1.01434	0.824198	0.299477	8.52952e-84	2.3637e-79	nucleolar and coiled-body phosphoprotein 1 [Source:ZFIN;Acc:ZDB-GENE-030131-6349]	GO:0005654(nucleoplasm);GO:0005730(nucleolus);GO:0048701(embryonic cranial skeleton morphogenesis)	NA	NA	NA
2	ENSDARG00000017775	atp5mc3a	3.12362	1.93839	0.688363	1.3254e-83	3.67294e-79	ATP synthase membrane subunit c locus 3a [Source:ZFIN;Acc:ZDB-GENE-040426-857]	GO:0000276(mitochondrial proton-transporting ATP synthase complex, coupling factor F(o));GO:0006811(ion transport);GO:0008289(lipid binding);GO:0015078(proton transmembrane transporter activity);GO:0015986(ATP synthesis coupled proton transport);GO:0015991(ATP hydrolysis coupled proton transport);GO:0016020(membrane);GO:0016021(integral component of membrane);GO:0033177(proton-transporting two-se…	00190(Oxidative phosphorylation)	K02128	NA
2	ENSDARG00000098627	gspt1l	1.45238	1.13792	0.352028	1.43497e-83	3.97659e-79	G1 to S phase transition 1, like [Source:ZFIN;Acc:ZDB-GENE-030131-4009]	GO:0001944(vasculature development);GO:0002184(cytoplasmic translational termination);GO:0003747(translation release factor activity);GO:0003924(GTPase activity);GO:0005525(GTP binding);GO:0005829(cytosol);GO:0006412(translation);GO:0018444(translation release factor complex)	03015(mRNA surveillance pathway)	K03267	NA
2	ENSDARG00000029415	mtx2	0.454405	0.378899	0.262167	2.21113e-83	6.12747e-79	metaxin 2 [Source:ZFIN;Acc:ZDB-GENE-021210-2]	GO:0001401(SAM complex)	NA	K17776	NA
2	ENSDARG00000069624	mrps18c	0.505066	0.409402	0.302954	2.75927e-83	7.6465e-79	mitochondrial ribosomal protein S18C [Source:ZFIN;Acc:ZDB-GENE-060503-609]	GO:0003735(structural constituent of ribosome);GO:0005622(intracellular);GO:0005763(mitochondrial small ribosomal subunit);GO:0005840(ribosome);GO:0006412(translation);GO:0070181(small ribosomal subunit rRNA binding)	03010(Ribosome)	K02963	NA
2	ENSDARG00000052842	ppifb	1.49162	1.194	0.321077	3.64532e-83	1.01019e-78	peptidylprolyl isomerase Fb [Source:ZFIN;Acc:ZDB-GENE-051030-126]	GO:0000413(protein peptidyl-prolyl isomerization);GO:0003755(peptidyl-prolyl cis-trans isomerase activity);GO:0005739(mitochondrion);GO:0006457(protein folding);GO:0016018(cyclosporin A binding);GO:0016853(isomerase activity);GO:0042026(protein refolding);GO:0046902(regulation of mitochondrial membrane permeability);GO:0051082(unfolded protein binding);GO:0070301(cellular response to hydrogen per…	04020(Calcium signaling pathway)	K09565	EC:5.2.1.8
2	ENSDARG00000044942	mrpl45	0.394665	0.325055	0.279944	4.06654e-83	1.12692e-78	mitochondrial ribosomal protein L45 [Source:ZFIN;Acc:ZDB-GENE-040426-1041]	GO:0005739(mitochondrion)	NA	K17426	NA
2	ENSDARG00000010831	churc1	0.561648	0.450937	0.316739	4.97882e-83	1.37973e-78	churchill domain containing 1 [Source:ZFIN;Acc:ZDB-GENE-041001-150]	GO:0007275(multicellular organism development);GO:0008270(zinc ion binding);GO:0045893(positive regulation of transcription, DNA-templated)	NA	NA	NA
2	ENSDARG00000018002	eci1	0.353663	0.294984	0.26174	4.98769e-83	1.38219e-78	enoyl-CoA delta isomerase 1 [Source:ZFIN;Acc:ZDB-GENE-030131-6033]	GO:0003824(catalytic activity);GO:0004300(enoyl-CoA hydratase activity);GO:0005739(mitochondrion);GO:0006635(fatty acid beta-oxidation)	00071(Fatty acid degradation)	K13238	EC:5.3.3.8
2	ENSDARG00000087636	hmgn6	3.94807	2.55835	0.625937	5.94447e-83	1.64733e-78	high mobility group nucleosome binding domain 6 [Source:ZFIN;Acc:ZDB-GENE-030131-1005]	GO:0000785(chromatin);GO:0003682(chromatin binding);GO:0005634(nucleus);GO:0031492(nucleosomal DNA binding);GO:0045944(positive regulation of transcription by RNA polymerase II);GO:0061178(regulation of insulin secretion involved in cellular response to glucose stimulus)	NA	K11299	NA
2	ENSDARG00000087779	pum3	0.807106	0.619099	0.382587	2.74335e-82	7.60238e-78	pumilio RNA-binding family member 3 [Source:ZFIN;Acc:ZDB-GENE-030131-9808]	GO:0003677(DNA binding);GO:0003723(RNA binding);GO:0005634(nucleus);GO:0005654(nucleoplasm);GO:0005694(chromosome);GO:0005730(nucleolus);GO:0008354(germ cell migration)	NA	K14844	NA
2	ENSDARG00000068940	atp5meb	2.7358	1.91103	0.517613	2.89873e-82	8.03297e-78	ATP synthase membrane subunit eb [Source:ZFIN;Acc:ZDB-GENE-051130-1]	GO:0000276(mitochondrial proton-transporting ATP synthase complex, coupling factor F(o));GO:0001666(response to hypoxia);GO:0015078(proton transmembrane transporter activity);GO:0015986(ATP synthesis coupled proton transport)	00190(Oxidative phosphorylation)	K02129	NA
2	ENSDARG00000092873	zgc:193541	2.56129	1.66823	0.618555	3.88437e-82	1.07644e-77	zgc:193541 [Source:ZFIN;Acc:ZDB-GENE-081022-15]	GO:0003674(molecular_function);GO:0005739(mitochondrion);GO:0008150(biological_process);GO:0016020(membrane);GO:0016021(integral component of membrane)	NA	K18193	NA
2	ENSDARG00000104451	slc39a7	0.411876	0.336184	0.292962	4.1808e-82	1.15858e-77	solute carrier family 39 (zinc transporter), member 7 [Source:ZFIN;Acc:ZDB-GENE-991110-20]	GO:0016020(membrane);GO:0016021(integral component of membrane);GO:0030001(metal ion transport);GO:0046873(metal ion transmembrane transporter activity);GO:0055085(transmembrane transport)	NA	K14713	NA
[truncated: 3,239 more rows]

## Sheet: Average expression profile
Average expression profile of B cell subset categories
GeneName	0_PBS	0_SVCV	0_Vaccinated+SVCV	1_PBS	1_SVCV	1_Vaccinated+SVCV	2_PBS	2_SVCV	2_Vaccinated+SVCV	3_PBS	3_SVCV	3_Vaccinated+SVCV	4_PBS	4_SVCV	4_Vaccinated+SVCV	5_PBS	5_SVCV	5_Vaccinated+SVCV	6_PBS	6_SVCV	6_Vaccinated+SVCV	7_PBS	7_SVCV	7_Vaccinated+SVCV	8_PBS	8_SVCV	8_Vaccinated+SVCV
[truncated: 19,932 more rows]

## Sheet: Number and percentage of cells 
Number and percentage of cells in each subset of B cells
[truncated: 4 more rows]
