# Supplementary material for: Single-cell RNA sequencing unveils the hidden powers of zebrafish kidney for generating both hematopoiesis and adaptive antiviral immunity
Source: eLife. 2024 Mar 18;13:RP92424. doi: 10.7554/eLife.92424 (PMC10948150; doi:10.7554/eLife.92424)
Supplement: Supplementary file 7. [file elife-92424-supp7.xlsx]

## Sheet: Marker gene list
Supplementary file 7. Marker gene list of neutrophil subsets
Target_Cluster	GeneID	GeneName	Target_Cluster_mean	Other_Cluster_mean	log2FC	pct.1	pct.2	Pvlaue	Qvalue	Description	GO	KEGG	KO_ENTRY	EC
0	ENSDARG00000099693	AL935065.1	7.70185	2.92545	1.39655	0.679	0.399	0	0	uncharacterized LOC567472 [Source:NCBI gene;Acc:567472]	GO:0005125(cytokine activity);GO:0005576(extracellular region);GO:0007166(cell surface receptor signaling pathway);GO:0010469(regulation of signaling receptor activity);GO:0016020(membrane);GO:0016021(integral component of membrane)	NA	NA	NA
0	ENSDARG00000006266	stat1a	10.9641	5.83031	0.911146	0.913	0.838	0	0	signal transducer and activator of transcription 1a [Source:ZFIN;Acc:ZDB-GENE-980526-499]	GO:0003677(DNA binding);GO:0003700(DNA-binding transcription factor activity);GO:0005634(nucleus);GO:0005737(cytoplasm);GO:0006355(regulation of transcription, DNA-templated);GO:0007165(signal transduction)	04217(Necroptosis);04620(Toll-like receptor signaling pathway);04621(NOD-like receptor signaling pathway);04625(C-type lectin receptor signaling pathway);04933(AGE-RAGE signaling pathway in diabetic complications);05168(Herpes simplex virus 1 infection)	K11220	NA
0	ENSDARG00000075261	timp2b	90.8742	50.1001	0.859058	0.998	0.973	0	0	TIMP metallopeptidase inhibitor 2b [Source:ZFIN;Acc:ZDB-GENE-040426-2655]	GO:0002020(protease binding);GO:0005515(protein binding);GO:0005576(extracellular region);GO:0005615(extracellular space);GO:0008191(metalloendopeptidase inhibitor activity);GO:0009725(response to hormone);GO:0010033(response to organic substance);GO:0010951(negative regulation of endopeptidase activity);GO:0031012(extracellular matrix);GO:0034097(response to cytokine);GO:0051045(negative regulat…	NA	NA	NA
0	ENSDARG00000097909	si:dkey-195m11.11	15.2268	9.26228	0.717176	0.977	0.932	0	0	si:dkey-195m11.11 [Source:ZFIN;Acc:ZDB-GENE-131127-648]	GO:0005044(scavenger receptor activity);GO:0006898(receptor-mediated endocytosis);GO:0016020(membrane);GO:0016021(integral component of membrane)	NA	NA	NA
0	ENSDARG00000033735	ncf1	83.0704	51.4836	0.69022	0.999	0.996	0	0	neutrophil cytosolic factor 1 [Source:ZFIN;Acc:ZDB-GENE-031006-6]	GO:0005515(protein binding);GO:0005737(cytoplasm);GO:0006801(superoxide metabolic process);GO:0016175(superoxide-generating NADPH oxidase activity);GO:0016176(superoxide-generating NADPH oxidase activator activity);GO:0035091(phosphatidylinositol binding);GO:0043085(positive regulation of catalytic activity);GO:0045730(respiratory burst);GO:0050832(defense response to fungus);GO:0055114(oxidation…	04145(Phagosome)	K08011	NA
0	ENSDARG00000009779	mcl1a	37.7425	25.2655	0.579023	0.999	0.993	0	0	MCL1, BCL2 family apoptosis regulator a [Source:ZFIN;Acc:ZDB-GENE-000511-7]	GO:0001894(tissue homeostasis);GO:0005741(mitochondrial outer membrane);GO:0007088(regulation of mitotic nuclear division);GO:0008630(intrinsic apoptotic signaling pathway in response to DNA damage);GO:0016020(membrane);GO:0016021(integral component of membrane);GO:0042803(protein homodimerization activity);GO:0042981(regulation of apoptotic process);GO:0043009(chordate embryonic development);GO:…	04210(Apoptosis)	K02539	NA
0	ENSDARG00000037870	actb2	386.242	259.62	0.573103	1	1	0	0	actin, beta 2 [Source:ZFIN;Acc:ZDB-GENE-000329-3]	GO:0000166(nucleotide binding);GO:0005524(ATP binding);GO:0005634(nucleus);GO:0005737(cytoplasm);GO:0005856(cytoskeleton);GO:0005886(plasma membrane);GO:0005925(focal adhesion);GO:0097433(dense body)	04145(Phagosome);04210(Apoptosis);04510(Focal adhesion);04520(Adherens junction);04530(Tight junction);04810(Regulation of actin cytoskeleton);05132(Salmonella infection)	K05692	NA
0	ENSDARG00000095556	CR318588.4	413.297	284.778	0.537343	1	1	0	0	uncharacterized LOC795545 [Source:NCBI gene;Acc:795545]	NA	NA	NA	NA
0	ENSDARG00000005481	nfkbiaa	78.507	56.0586	0.485886	0.999	0.995	0	0	nuclear factor of kappa light polypeptide gene enhancer in B-cells inhibitor, alpha a [Source:ZFIN;Acc:ZDB-GENE-040426-2227]	GO:0005515(protein binding);GO:0009615(response to virus);GO:1901532(regulation of hematopoietic progenitor cell differentiation);GO:1901533(negative regulation of hematopoietic progenitor cell differentiation)	04210(Apoptosis);04620(Toll-like receptor signaling pathway);04621(NOD-like receptor signaling pathway);04622(RIG-I-like receptor signaling pathway);04623(Cytosolic DNA-sensing pathway);04625(C-type lectin receptor signaling pathway);04920(Adipocytokine signaling pathway);05168(Herpes simplex virus 1 infection)	K04734	NA
0	ENSDARG00000103791	nme2b.1	45.1781	32.8024	0.461821	1	0.985	0	0	NME/NM23 nucleoside diphosphate kinase 2b, tandem duplicate 1 [Source:ZFIN;Acc:ZDB-GENE-000210-32]	GO:0000166(nucleotide binding);GO:0004550(nucleoside diphosphate kinase activity);GO:0005524(ATP binding);GO:0006165(nucleoside diphosphate phosphorylation);GO:0006183(GTP biosynthetic process);GO:0006228(UTP biosynthetic process);GO:0006241(CTP biosynthetic process);GO:0016301(kinase activity);GO:0016310(phosphorylation);GO:0016740(transferase activity);GO:0045765(regulation of angiogenesis)	00230(Purine metabolism);00240(Pyrimidine metabolism);00983(Drug metabolism - other enzymes)	K00940	EC:2.7.4.6
0	ENSDARG00000104077	fcer1gl	19.7863	14.3758	0.46086	0.992	0.957	0	0	Fc receptor, IgE, high affinity I, gamma polypeptide like [Source:ZFIN;Acc:ZDB-GENE-070502-4]	GO:0016020(membrane);GO:0016021(integral component of membrane)	NA	NA	NA
0	ENSDARG00000077308	gpr84	14.0082	8.64538	0.696268	0.957	0.864	7.05243e-305	1.95437e-300	G protein-coupled receptor 84 [Source:ZFIN;Acc:ZDB-GENE-070928-33]	GO:0001604(urotensin II receptor activity);GO:0004930(G protein-coupled receptor activity);GO:0005887(integral component of plasma membrane);GO:0007186(G protein-coupled receptor signaling pathway);GO:0007218(neuropeptide signaling pathway);GO:0008528(G protein-coupled peptide receptor activity);GO:0016020(membrane);GO:0016021(integral component of membrane);GO:0032496(response to lipopolysacchar…	NA	K08421	NA
0	ENSDARG00000069290	bida	7.40404	4.30692	0.781657	0.881	0.809	1.95723e-299	5.42387e-295	BH3 interacting domain death agonist [Source:ZFIN;Acc:ZDB-GENE-050419-35]	GO:0005737(cytoplasm);GO:0042981(regulation of apoptotic process);GO:0043065(positive regulation of apoptotic process)	04115(p53 signaling pathway);04210(Apoptosis);04217(Necroptosis);05168(Herpes simplex virus 1 infection)	K04726	NA
0	ENSDARG00000114451	mmp13a.1	50.4236	32.9143	0.615386	0.969	0.815	9.74042e-287	2.69927e-282	matrix metallopeptidase 13a [Source:ZFIN;Acc:ZDB-GENE-031202-2]	GO:0004222(metalloendopeptidase activity);GO:0005615(extracellular space);GO:0006508(proteolysis);GO:0008233(peptidase activity);GO:0008237(metallopeptidase activity);GO:0008270(zinc ion binding);GO:0016787(hydrolase activity);GO:0030198(extracellular matrix organization);GO:0030574(collagen catabolic process);GO:0031012(extracellular matrix);GO:0046872(metal ion binding);GO:0048246(macrophage ch…	NA	NA	NA
0	ENSDARG00000034117	rarga	4.26886	2.3638	0.852743	0.715	0.496	5.92233e-270	1.6412e-265	retinoic acid receptor gamma a [Source:ZFIN;Acc:ZDB-GENE-980526-531]	GO:0000122(negative regulation of transcription by RNA polymerase II);GO:0000976(transcription regulatory region sequence-specific DNA binding);GO:0000977(RNA polymerase II regulatory region sequence-specific DNA binding);GO:0000981(DNA-binding transcription factor activity, RNA polymerase II-specific);GO:0001889(liver development);GO:0003677(DNA binding);GO:0003700(DNA-binding transcription fact…	NA	K08529	NA
0	ENSDARG00000103720	zgc:162730	15.4842	8.13628	0.928351	0.864	0.718	4.42569e-251	1.22645e-246	zgc:162730 [Source:ZFIN;Acc:ZDB-GENE-030131-6366]	GO:0003730(mRNA 3'-UTR binding);GO:0005829(cytosol);GO:0046872(metal ion binding);GO:0061158(3'-UTR-mediated mRNA destabilization)	NA	NA	NA
0	ENSDARG00000027249	btg1	27.6796	19.4145	0.511686	0.998	0.992	6.64738e-247	1.84212e-242	B-cell translocation gene 1, anti-proliferative [Source:ZFIN;Acc:ZDB-GENE-010726-1]	GO:0005634(nucleus);GO:0005737(cytoplasm);GO:0008285(negative regulation of cell population proliferation);GO:0045930(negative regulation of mitotic cell cycle)	03018(RNA degradation)	K14443	NA
0	ENSDARG00000026350	wasb	9.60738	6.48432	0.567188	0.932	0.907	1.16223e-244	3.22078e-240	Wiskott-Aldrich syndrome (eczema-thrombocytopenia) b [Source:ZFIN;Acc:ZDB-GENE-030131-7098]	GO:0000147(actin cortical patch assembly);GO:0003779(actin binding);GO:0005884(actin filament);GO:0006897(endocytosis);GO:0007015(actin filament organization);GO:0030048(actin filament-based movement);GO:0030479(actin cortical patch);GO:0030593(neutrophil chemotaxis);GO:0030595(leukocyte chemotaxis);GO:0048246(macrophage chemotaxis);GO:0051015(actin filament binding);GO:0051127(positive regulatio…	04144(Endocytosis);04520(Adherens junction);04530(Tight junction);04810(Regulation of actin cytoskeleton);05132(Salmonella infection)	K05747	NA
0	ENSDARG00000038687	nfkb2	3.822	2.28643	0.741232	0.634	0.57	1.6812e-244	4.65894e-240	nuclear factor of kappa light polypeptide gene enhancer in B-cells 2 (p49/p100) [Source:ZFIN;Acc:ZDB-GENE-030131-6701]	GO:0001525(angiogenesis);GO:0003677(DNA binding);GO:0003700(DNA-binding transcription factor activity);GO:0005515(protein binding);GO:0005634(nucleus);GO:0005737(cytoplasm);GO:0006355(regulation of transcription, DNA-templated);GO:0007165(signal transduction)	04010(MAPK signaling pathway);04625(C-type lectin receptor signaling pathway)	K04469	NA
0	ENSDARG00000045525	tmcc3	3.68744	2.23921	0.719631	0.674	0.562	2.39127e-237	6.62669e-233	transmembrane and coiled-coil domain family 3 [Source:ZFIN;Acc:ZDB-GENE-030131-1811]	GO:0016020(membrane);GO:0016021(integral component of membrane)	NA	NA	NA
0	ENSDARG00000077975	si:ch73-343l4.8	10.123	6.43462	0.653711	0.898	0.803	2.09228e-232	5.79811e-228	si:ch73-343l4.8 [Source:ZFIN;Acc:ZDB-GENE-090313-159]	GO:0016020(membrane);GO:0016021(integral component of membrane);GO:0030246(carbohydrate binding)	NA	NA	NA
0	ENSDARG00000098700	il1b	64.7729	49.9379	0.375256	0.997	0.983	2.09803e-231	5.81406e-227	interleukin 1, beta [Source:ZFIN;Acc:ZDB-GENE-040702-2]	GO:0002237(response to molecule of bacterial origin);GO:0005125(cytokine activity);GO:0005149(interleukin-1 receptor binding);GO:0005576(extracellular region);GO:0005615(extracellular space);GO:0006954(inflammatory response);GO:0006955(immune response);GO:0009615(response to virus);GO:0009617(response to bacterium);GO:0010469(regulation of signaling receptor activity);GO:0030593(neutrophil chemot…	04010(MAPK signaling pathway);04060(Cytokine-cytokine receptor interaction);04217(Necroptosis);04620(Toll-like receptor signaling pathway);04621(NOD-like receptor signaling pathway);04623(Cytosolic DNA-sensing pathway);04625(C-type lectin receptor signaling pathway);04933(AGE-RAGE signaling pathway in diabetic complications);05132(Salmonella infection);05168(Herpes simplex virus 1 infection)	K04519	NA
0	ENSDARG00000099148	bzw1b	16.5896	10.3536	0.680147	0.938	0.882	5.99307e-228	1.6608e-223	basic leucine zipper and W2 domains 1b [Source:ZFIN;Acc:ZDB-GENE-040426-2881]	GO:0005515(protein binding)	NA	NA	NA
0	ENSDARG00000056453	afap1l1b	4.68828	2.41862	0.954875	0.607	0.445	4.11788e-227	1.14115e-222	actin filament associated protein 1-like 1b [Source:ZFIN;Acc:ZDB-GENE-061013-428]	GO:0005575(cellular_component);GO:0008150(biological_process)	NA	NA	NA
0	ENSDARG00000053836	si:ch211-284o19.8	15.9978	10.452	0.614102	0.974	0.935	3.96011e-226	1.09742e-221	si:ch211-284o19.8 [Source:ZFIN;Acc:ZDB-GENE-070912-289]	GO:0016020(membrane);GO:0016021(integral component of membrane)	NA	NA	NA
0	ENSDARG00000068214	ccni	11.201	7.9192	0.500201	0.968	0.954	8.48773e-223	2.35212e-218	cyclin I [Source:ZFIN;Acc:ZDB-GENE-040426-2898]	GO:0000079(regulation of cyclin-dependent protein serine/threonine kinase activity);GO:0000278(mitotic cell cycle);GO:0000307(cyclin-dependent protein kinase holoenzyme complex);GO:0003674(molecular_function);GO:0004672(protein kinase activity);GO:0005575(cellular_component);GO:0005634(nucleus);GO:0005737(cytoplasm);GO:0006468(protein phosphorylation);GO:0007088(regulation of mitotic nuclear divi…	NA	NA	NA
0	ENSDARG00000105530	si:dkey-19b23.14	11.2212	7.59692	0.562746	0.957	0.903	1.20667e-221	3.34392e-217	si:dkey-19b23.14 [Source:ZFIN;Acc:ZDB-GENE-160728-109]	GO:0016020(membrane);GO:0016021(integral component of membrane)	NA	NA	NA
0	ENSDARG00000102762	pik3r5	5.61549	3.61161	0.63677	0.815	0.743	1.05524e-216	2.92429e-212	phosphoinositide-3-kinase, regulatory subunit 5 [Source:ZFIN;Acc:ZDB-GENE-030131-2308]	GO:0005942(phosphatidylinositol 3-kinase complex);GO:0005944(phosphatidylinositol 3-kinase complex, class IB);GO:0007186(G protein-coupled receptor signaling pathway);GO:0014065(phosphatidylinositol 3-kinase signaling);GO:0043406(positive regulation of MAP kinase activity);GO:0043551(regulation of phosphatidylinositol 3-kinase activity);GO:0046935(1-phosphatidylinositol-3-kinase regulator activit…	04261(Adrenergic signaling in cardiomyocytes);04371(Apelin signaling pathway)	K21290	NA
0	ENSDARG00000005673	f3b	6.41935	2.73777	1.22943	0.561	0.342	2.95499e-209	8.18887e-205	coagulation factor IIIb [Source:ZFIN;Acc:ZDB-GENE-050417-234]	GO:0001944(vasculature development);GO:0004896(cytokine receptor activity);GO:0005515(protein binding);GO:0005886(plasma membrane);GO:0007596(blood coagulation);GO:0016020(membrane);GO:0016021(integral component of membrane);GO:0019221(cytokine-mediated signaling pathway)	04933(AGE-RAGE signaling pathway in diabetic complications)	K03901	NA
0	ENSDARG00000043249	irf1b	3.23474	1.77397	0.866665	0.537	0.394	3.80473e-204	1.05437e-199	interferon regulatory factor 1b [Source:ZFIN;Acc:ZDB-GENE-041114-13]	GO:0000981(DNA-binding transcription factor activity, RNA polymerase II-specific);GO:0002376(immune system process);GO:0003677(DNA binding);GO:0003700(DNA-binding transcription factor activity);GO:0005515(protein binding);GO:0005634(nucleus);GO:0006355(regulation of transcription, DNA-templated);GO:0006357(regulation of transcription by RNA polymerase II);GO:0006915(apoptotic process);GO:0008285(…	04625(C-type lectin receptor signaling pathway)	K09444	NA
0	ENSDARG00000099281	si:dkey-112e7.2	4.509	3.20445	0.49273	0.795	0.754	3.40611e-203	9.43901e-199	si:dkey-112e7.2 [Source:ZFIN;Acc:ZDB-GENE-141216-229]	GO:0016020(membrane);GO:0016021(integral component of membrane)	NA	NA	NA
0	ENSDARG00000060723	stim1a	3.59183	2.4749	0.537348	0.662	0.658	2.46708e-201	6.83677e-197	stromal interaction molecule 1a [Source:ZFIN;Acc:ZDB-GENE-060503-914]	GO:0002115(store-operated calcium entry);GO:0005246(calcium channel regulator activity);GO:0005509(calcium ion binding);GO:0005515(protein binding);GO:0005783(endoplasmic reticulum);GO:0005886(plasma membrane);GO:0006874(cellular calcium ion homeostasis);GO:0016020(membrane);GO:0016021(integral component of membrane);GO:0030176(integral component of endoplasmic reticulum membrane);GO:0032237(acti…	04020(Calcium signaling pathway)	K16059	NA
0	ENSDARG00000074851	s1pr4	5.94533	4.13991	0.522158	0.779	0.522	9.13092e-201	2.53036e-196	sphingosine-1-phosphate receptor 4 [Source:ZFIN;Acc:ZDB-GENE-050506-8]	GO:0003376(sphingosine-1-phosphate receptor signaling pathway);GO:0004930(G protein-coupled receptor activity);GO:0007165(signal transduction);GO:0007186(G protein-coupled receptor signaling pathway);GO:0016020(membrane);GO:0016021(integral component of membrane);GO:0030593(neutrophil chemotaxis);GO:0038036(sphingosine-1-phosphate receptor activity)	04068(FoxO signaling pathway);04080(Neuroactive ligand-receptor interaction)	K04293	NA
0	ENSDARG00000054543	samsn1a	10.6543	7.13226	0.579011	0.944	0.89	2.80214e-200	7.7653e-196	SAM domain, SH3 domain and nuclear localisation signals 1a [Source:ZFIN;Acc:ZDB-GENE-030131-8639]	GO:0005515(protein binding)	NA	NA	NA
0	ENSDARG00000103566	tomm20b	2.73147	2.10556	0.375472	0.643	0.66	4.71511e-197	1.30665e-192	translocase of outer mitochondrial membrane 20b [Source:ZFIN;Acc:ZDB-GENE-040718-451]	GO:0005739(mitochondrion);GO:0005741(mitochondrial outer membrane);GO:0005742(mitochondrial outer membrane translocase complex);GO:0006605(protein targeting);GO:0006886(intracellular protein transport);GO:0008320(protein transmembrane transporter activity);GO:0015031(protein transport);GO:0015450(P-P-bond-hydrolysis-driven protein transmembrane transporter activity);GO:0016020(membrane);GO:001602…	NA	K17770	NA
0	ENSDARG00000059357	sarnp	2.30852	1.79496	0.363013	0.588	0.606	3.58939e-189	9.94692e-185	SAP domain containing ribonucleoprotein [Source:ZFIN;Acc:ZDB-GENE-050522-161]	GO:0005575(cellular_component);GO:0008150(biological_process)	NA	K18732	NA
0	ENSDARG00000025428	socs3a	9.05014	5.21957	0.79401	0.767	0.59	5.0579e-183	1.40164e-178	suppressor of cytokine signaling 3a [Source:ZFIN;Acc:ZDB-GENE-030131-7349]	GO:0005942(phosphatidylinositol 3-kinase complex);GO:0007259(receptor signaling pathway via JAK-STAT);GO:0016567(protein ubiquitination);GO:0031099(regeneration);GO:0035556(intracellular signal transduction);GO:0035677(posterior lateral line neuromast hair cell development);GO:0043066(negative regulation of apoptotic process);GO:0043551(regulation of phosphatidylinositol 3-kinase activity);GO:004…	NA	NA	NA
0	ENSDARG00000075870	triobpa	3.01754	2.23552	0.432764	0.64	0.629	7.83851e-179	2.17221e-174	TRIO and F-actin binding protein a [Source:ZFIN;Acc:ZDB-GENE-110411-40]	GO:0032956(regulation of actin cytoskeleton organization);GO:0051015(actin filament binding)	NA	NA	NA
0	ENSDARG00000068382	pglyrp5	9.68636	5.02484	0.946878	0.752	0.627	1.64823e-178	4.56757e-174	peptidoglycan recognition protein 5 [Source:ZFIN;Acc:ZDB-GENE-050419-71]	GO:0002221(pattern recognition receptor signaling pathway);GO:0005615(extracellular space);GO:0008270(zinc ion binding);GO:0008745(N-acetylmuramoyl-L-alanine amidase activity);GO:0009253(peptidoglycan catabolic process);GO:0016019(peptidoglycan receptor activity);GO:0016045(detection of bacterium);GO:0019730(antimicrobial humoral response);GO:0031640(killing of cells of other organism);GO:0032689…	NA	K01446	NA
0	ENSDARG00000036965	rnf24	3.3526	2.16837	0.628666	0.598	0.509	1.16974e-176	3.24157e-172	ring finger protein 24 [Source:ZFIN;Acc:ZDB-GENE-041114-40]	GO:0005794(Golgi apparatus);GO:0008270(zinc ion binding);GO:0012505(endomembrane system);GO:0016020(membrane);GO:0016021(integral component of membrane);GO:0016567(protein ubiquitination);GO:0046872(metal ion binding);GO:0061630(ubiquitin protein ligase activity)	NA	NA	NA
0	ENSDARG00000059906	sdc4	3.97466	2.19998	0.853341	0.556	0.419	1.24919e-175	3.46175e-171	syndecan 4 [Source:ZFIN;Acc:ZDB-GENE-061111-1]	GO:0005546(phosphatidylinositol-4,5-bisphosphate binding);GO:0005925(focal adhesion);GO:0007155(cell adhesion);GO:0009986(cell surface);GO:0016020(membrane);GO:0016021(integral component of membrane);GO:0016477(cell migration);GO:0033627(cell adhesion mediated by integrin);GO:0036445(neuronal stem cell division);GO:0042060(wound healing);GO:0043149(stress fiber assembly);GO:0055113(epiboly involv…	04512(ECM-receptor interaction);04514(Cell adhesion molecules (CAMs))	K16338	NA
0	ENSDARG00000103483	litaf	4.11186	2.95279	0.477711	0.736	0.728	3.16691e-174	8.77615e-170	lipopolysaccharide-induced TNF factor [Source:ZFIN;Acc:ZDB-GENE-040704-23]	GO:0000139(Golgi membrane);GO:0003677(DNA binding);GO:0005634(nucleus);GO:0005737(cytoplasm);GO:0005764(lysosome);GO:0005765(lysosomal membrane);GO:0005768(endosome);GO:0005794(Golgi apparatus);GO:0005886(plasma membrane);GO:0008270(zinc ion binding);GO:0009898(cytoplasmic side of plasma membrane);GO:0010008(endosome membrane);GO:0016020(membrane);GO:0031901(early endosome membrane);GO:0031902(la…	04142(Lysosome)	K19363	NA
0	ENSDARG00000043457	gapdh	9.97552	6.73525	0.566661	0.843	0.815	9.88749e-171	2.74002e-166	glyceraldehyde-3-phosphate dehydrogenase [Source:ZFIN;Acc:ZDB-GENE-030115-1]	GO:0000166(nucleotide binding);GO:0000226(microtubule cytoskeleton organization);GO:0004365(glyceraldehyde-3-phosphate dehydrogenase (NAD+) (phosphorylating) activity);GO:0005634(nucleus);GO:0005737(cytoplasm);GO:0005829(cytosol);GO:0005856(cytoskeleton);GO:0006006(glucose metabolic process);GO:0006096(glycolytic process);GO:0006915(apoptotic process);GO:0008017(microtubule binding);GO:0015630(mi…	00010(Glycolysis / Gluconeogenesis)	K00134	EC:1.2.1.12
0	ENSDARG00000102741	sumo2b	2.16514	1.67753	0.368122	0.542	0.557	7.8695e-170	2.1808e-165	small ubiquitin-like modifier 2b [Source:ZFIN;Acc:ZDB-GENE-040801-7]	GO:0005515(protein binding);GO:0005634(nucleus);GO:0016925(protein sumoylation);GO:0031386(protein tag);GO:0043009(chordate embryonic development);GO:0044389(ubiquitin-like protein ligase binding);GO:0060216(definitive hemopoiesis)	03013(RNA transport)	K12160	NA
0	ENSDARG00000068367	nfkbie	3.52323	2.55461	0.463796	0.652	0.664	1.39107e-167	3.85494e-163	nuclear factor of kappa light polypeptide gene enhancer in B-cells inhibitor, epsilon [Source:ZFIN;Acc:ZDB-GENE-061215-132]	GO:0003674(molecular_function);GO:0005515(protein binding);GO:0005575(cellular_component);GO:0008150(biological_process)	04920(Adipocytokine signaling pathway)	K05872	NA
0	ENSDARG00000079705	FP101887.1	3.40613	2.37095	0.522667	0.676	0.607	1.95472e-167	5.41693e-163	si:ch211-152p11.4 [Source:NCBI gene;Acc:555531]	GO:0005096(GTPase activator activity);GO:0008277(regulation of G protein-coupled receptor signaling pathway);GO:0043547(positive regulation of GTPase activity)	NA	K16449	NA
0	ENSDARG00000013539	ikzf1	1.48191	1.04896	0.498501	0.375	0.338	7.5737e-167	2.09882e-162	IKAROS family zinc finger 1 (Ikaros) [Source:ZFIN;Acc:ZDB-GENE-980526-304]	GO:0003676(nucleic acid binding);GO:0003700(DNA-binding transcription factor activity);GO:0005654(nucleoplasm);GO:0030183(B cell differentiation);GO:0033077(T cell differentiation in thymus);GO:0044212(transcription regulatory region DNA binding);GO:0045944(positive regulation of transcription by RNA polymerase II)	NA	K09220	NA
0	ENSDARG00000038068	ddx5	10.7458	8.70878	0.303228	0.967	0.944	2.4575e-166	6.81023e-162	DEAD (Asp-Glu-Ala-Asp) box helicase 5 [Source:ZFIN;Acc:ZDB-GENE-030131-925]	GO:0000166(nucleotide binding);GO:0003676(nucleic acid binding);GO:0004386(helicase activity);GO:0005524(ATP binding);GO:0016020(membrane);GO:0016021(integral component of membrane);GO:0016787(hydrolase activity)	03040(Spliceosome)	K12823	EC:3.6.4.13
0	ENSDARG00000075733	zyx	1.75904	1.32567	0.408068	0.463	0.453	3.61343e-166	1.00135e-161	zyxin [Source:ZFIN;Acc:ZDB-GENE-070928-18]	GO:0046872(metal ion binding)	04510(Focal adhesion)	K06273	NA
0	ENSDARG00000104396	trim25	1.05219	0.828162	0.345407	0.303	0.316	4.42462e-166	1.22615e-161	tripartite motif containing 25 [Source:ZFIN;Acc:ZDB-GENE-040426-797]	GO:0005515(protein binding);GO:0008270(zinc ion binding);GO:0039535(regulation of RIG-I signaling pathway);GO:0046872(metal ion binding)	04622(RIG-I-like receptor signaling pathway)	K10652	EC:2.3.2.27
0	ENSDARG00000043182	hhla2a.1	5.59895	3.85533	0.538302	0.809	0.747	5.73252e-166	1.5886e-161	HERV-H LTR-associating 2a, tandem duplicate 1 [Source:ZFIN;Acc:ZDB-GENE-050327-45]	GO:0003674(molecular_function);GO:0006955(immune response);GO:0007165(signal transduction);GO:0007166(cell surface receptor signaling pathway);GO:0009897(external side of plasma membrane);GO:0009986(cell surface);GO:0016020(membrane);GO:0016021(integral component of membrane);GO:0031295(T cell costimulation);GO:0042102(positive regulation of T cell proliferation);GO:0042130(negative regulation of…	NA	NA	NA
0	ENSDARG00000099672	capgb	7.84617	6.001	0.386785	0.915	0.908	7.80459e-165	2.16281e-160	capping protein (actin filament), gelsolin-like b [Source:ZFIN;Acc:ZDB-GENE-030131-8541]	GO:0005575(cellular_component);GO:0051015(actin filament binding);GO:0051016(barbed-end actin filament capping)	NA	K10368	NA
0	ENSDARG00000099195	ier2a	3.55958	2.28911	0.636919	0.584	0.545	1.58293e-164	4.38662e-160	immediate early response 2a [Source:ZFIN;Acc:ZDB-GENE-030131-9126]	NA	NA	NA	NA
0	ENSDARG00000067797	spi1a	2.82629	1.92711	0.55247	0.579	0.512	3.07608e-163	8.52443e-159	Spi-1 proto-oncogene a [Source:ZFIN;Acc:ZDB-GENE-060825-351]	GO:0000981(DNA-binding transcription factor activity, RNA polymerase II-specific);GO:0002761(regulation of myeloid leukocyte differentiation);GO:0003677(DNA binding);GO:0003700(DNA-binding transcription factor activity);GO:0005634(nucleus);GO:0006355(regulation of transcription, DNA-templated);GO:0006357(regulation of transcription by RNA polymerase II);GO:0030154(cell differentiation);GO:0043565…	NA	NA	NA
0	ENSDARG00000055759	efhd2	4.21386	2.87921	0.549473	0.746	0.654	1.14598e-162	3.17574e-158	EF-hand domain family, member D2 [Source:ZFIN;Acc:ZDB-GENE-060531-152]	GO:0005509(calcium ion binding)	NA	NA	NA
0	ENSDARG00000068784	vsir	14.5248	10.8244	0.424226	0.971	0.948	1.30014e-162	3.60295e-158	V-set immunoregulatory receptor [Source:ZFIN;Acc:ZDB-GENE-060929-716]	GO:0003674(molecular_function);GO:0016020(membrane);GO:0016021(integral component of membrane)	04514(Cell adhesion molecules (CAMs))	K23268	NA
0	ENSDARG00000031954	rbck1	1.06753	0.804343	0.408395	0.289	0.278	8.63361e-162	2.39255e-157	RanBP-type and C3HC4-type zinc finger containing 1 [Source:ZFIN;Acc:ZDB-GENE-040704-3]	GO:0005515(protein binding);GO:0016740(transferase activity);GO:0046872(metal ion binding);GO:0048701(embryonic cranial skeleton morphogenesis)	04217(Necroptosis);04621(NOD-like receptor signaling pathway)	K10630	EC:2.3.2.31
0	ENSDARG00000007693	nfkbiab	54.9828	37.1227	0.56668	0.997	0.989	1.13015e-161	3.13187e-157	nuclear factor of kappa light polypeptide gene enhancer in B-cells inhibitor, alpha b [Source:ZFIN;Acc:ZDB-GENE-030131-1819]	GO:0005515(protein binding)	04210(Apoptosis);04620(Toll-like receptor signaling pathway);04621(NOD-like receptor signaling pathway);04622(RIG-I-like receptor signaling pathway);04623(Cytosolic DNA-sensing pathway);04625(C-type lectin receptor signaling pathway);04920(Adipocytokine signaling pathway);05168(Herpes simplex virus 1 infection)	K04734	NA
0	ENSDARG00000010625	clic2	2.2956	1.38509	0.728889	0.431	0.324	3.81799e-161	1.05804e-156	chloride intracellular channel 2 [Source:ZFIN;Acc:ZDB-GENE-040718-299]	GO:0005244(voltage-gated ion channel activity);GO:0005254(chloride channel activity);GO:0005515(protein binding);GO:0005634(nucleus);GO:0005737(cytoplasm);GO:0006811(ion transport);GO:0006821(chloride transport);GO:0016020(membrane);GO:0034707(chloride channel complex);GO:0034765(regulation of ion transmembrane transport);GO:0060315(negative regulation of ryanodine-sensitive calcium-release chann…	NA	K05022	NA
0	ENSDARG00000035715	marcksl1b	28.6766	14.2837	1.0055	0.792	0.748	1.10521e-160	3.06277e-156	MARCKS-like 1b [Source:ZFIN;Acc:ZDB-GENE-040426-2315]	GO:0003407(neural retina development);GO:0005516(calmodulin binding);GO:0005737(cytoplasm);GO:0005856(cytoskeleton);GO:0005886(plasma membrane);GO:0007417(central nervous system development);GO:0016020(membrane);GO:0051216(cartilage development)	NA	NA	NA
0	ENSDARG00000089307	pmaip1	3.4093	2.07745	0.714661	0.526	0.478	1.06998e-159	2.96514e-155	phorbol-12-myristate-13-acetate-induced protein 1 [Source:ZFIN;Acc:ZDB-GENE-070119-3]	GO:0001836(release of cytochrome c from mitochondria);GO:0005575(cellular_component);GO:0006915(apoptotic process);GO:0006919(activation of cysteine-type endopeptidase activity involved in apoptotic process);GO:0006974(cellular response to DNA damage stimulus);GO:0007088(regulation of mitotic nuclear division);GO:0042981(regulation of apoptotic process);GO:0043065(positive regulation of apoptotic…	04115(p53 signaling pathway);04210(Apoptosis)	K10131	NA
0	ENSDARG00000104372	gnb1b	9.52362	6.91669	0.461429	0.943	0.931	2.05001e-158	5.68098e-154	guanine nucleotide binding protein (G protein), beta polypeptide 1b [Source:ZFIN;Acc:ZDB-GENE-040426-2855]	GO:0005515(protein binding);GO:0007165(signal transduction);GO:0048920(posterior lateral line neuromast primordium migration);GO:1902624(positive regulation of neutrophil migration)	04371(Apelin signaling pathway);04744(Phototransduction)	K04536	NA
0	ENSDARG00000052348	smarca5	1.74477	1.26793	0.460558	0.451	0.4	3.46641e-158	9.60612e-154	SWI/SNF related, matrix associated, actin dependent regulator of chromatin, subfamily a, member 5 [Source:ZFIN;Acc:ZDB-GENE-021125-1]	GO:0000166(nucleotide binding);GO:0003231(cardiac ventricle development);GO:0003676(nucleic acid binding);GO:0003677(DNA binding);GO:0004386(helicase activity);GO:0005524(ATP binding);GO:0005634(nucleus);GO:0006325(chromatin organization);GO:0006338(chromatin remodeling);GO:0016589(NURF complex);GO:0016787(hydrolase activity);GO:0016818(hydrolase activity, acting on acid anhydrides, in phosphorus…	NA	K11654	EC:3.6.4.-
0	ENSDARG00000104636	si:dkey-112a7.4	7.83893	5.53783	0.501338	0.903	0.869	1.13313e-157	3.14012e-153	si:dkey-112a7.4 [Source:ZFIN;Acc:ZDB-GENE-030131-9661]	GO:0004860(protein kinase inhibitor activity);GO:0006469(negative regulation of protein kinase activity)	NA	NA	NA
0	ENSDARG00000068628	rab8b	7.47149	5.09894	0.551198	0.831	0.797	3.82215e-156	1.05919e-151	RAB8B, member RAS oncogene family [Source:ZFIN;Acc:ZDB-GENE-070620-16]	GO:0003924(GTPase activity);GO:0005525(GTP binding);GO:0005768(endosome);GO:0005886(plasma membrane);GO:0006886(intracellular protein transport);GO:0006904(vesicle docking involved in exocytosis);GO:0008021(synaptic vesicle);GO:0009306(protein secretion);GO:0017157(regulation of exocytosis);GO:0030140(trans-Golgi network transport vesicle);GO:0032482(Rab protein signal transduction);GO:0032869(ce…	04530(Tight junction)	K07902	NA
0	ENSDARG00000015149	wasa	2.07344	1.63763	0.340412	0.527	0.544	9.60315e-156	2.66123e-151	Wiskott-Aldrich syndrome (eczema-thrombocytopenia) a [Source:ZFIN;Acc:ZDB-GENE-081104-419]	GO:0000147(actin cortical patch assembly);GO:0003779(actin binding);GO:0005884(actin filament);GO:0006897(endocytosis);GO:0007015(actin filament organization);GO:0030048(actin filament-based movement);GO:0030479(actin cortical patch);GO:0051015(actin filament binding);GO:0051127(positive regulation of actin nucleation);GO:0051666(actin cortical patch localization);GO:2000601(positive regulation o…	04144(Endocytosis);04520(Adherens junction);04530(Tight junction);04810(Regulation of actin cytoskeleton);05132(Salmonella infection)	K05747	NA
0	ENSDARG00000105273	FP074902.2	1.99647	1.40641	0.505437	0.479	0.406	1.4791e-155	4.09889e-151	si:ch73-295i22.2 [Source:NCBI gene;Acc:100538042]	NA	NA	NA	NA
0	ENSDARG00000008075	illr4	7.996	5.93426	0.43021	0.908	0.808	5.98009e-155	1.6572e-150	immune-related, lectin-like receptor 4 [Source:ZFIN;Acc:ZDB-GENE-050311-5]	GO:0016020(membrane);GO:0016021(integral component of membrane);GO:0030246(carbohydrate binding)	NA	K10064	NA
0	ENSDARG00000038076	romo1	7.78275	5.89981	0.399611	0.917	0.89	2.10696e-154	5.8388e-150	reactive oxygen species modulator 1 [Source:ZFIN;Acc:ZDB-GENE-040426-1768]	GO:0001302(replicative cell aging);GO:0003674(molecular_function);GO:0005739(mitochondrion);GO:0005743(mitochondrial inner membrane);GO:0005744(TIM23 mitochondrial import inner membrane translocase complex);GO:0008284(positive regulation of cell population proliferation);GO:0016020(membrane);GO:0016021(integral component of membrane);GO:0030150(protein import into mitochondrial matrix);GO:0034614…	NA	NA	NA
0	ENSDARG00000092115	eif4a1a	6.2968	4.46318	0.496548	0.854	0.806	4.8097e-154	1.33287e-149	eukaryotic translation initiation factor 4A1A [Source:ZFIN;Acc:ZDB-GENE-031030-2]	GO:0003676(nucleic acid binding);GO:0003743(translation initiation factor activity);GO:0004004(ATP-dependent RNA helicase activity);GO:0005524(ATP binding);GO:0006413(translational initiation)	03013(RNA transport)	K03257	NA
0	ENSDARG00000062721	dennd4a	2.87217	1.85252	0.632653	0.58	0.433	9.0707e-154	2.51367e-149	DENN/MADD domain containing 4A [Source:ZFIN;Acc:ZDB-GENE-060503-285]	GO:0005515(protein binding)	NA	K20163	NA
0	ENSDARG00000014348	stk17b	3.76268	2.80598	0.423255	0.751	0.721	3.97459e-153	1.10144e-148	serine/threonine kinase 17b (apoptosis-inducing) [Source:ZFIN;Acc:ZDB-GENE-040426-1499]	GO:0000166(nucleotide binding);GO:0004672(protein kinase activity);GO:0004674(protein serine/threonine kinase activity);GO:0005524(ATP binding);GO:0005634(nucleus);GO:0006468(protein phosphorylation);GO:0016301(kinase activity);GO:0016310(phosphorylation)	NA	K08804	EC:2.7.11.1
0	ENSDARG00000062933	cmip	7.04193	5.15166	0.450934	0.883	0.876	1.14599e-151	3.17577e-147	c-Maf inducing protein [Source:ZFIN;Acc:ZDB-GENE-050419-50]	NA	NA	NA	NA
0	ENSDARG00000055080	rbm4.2	1.62493	1.32512	0.294248	0.463	0.481	9.10191e-150	2.52232e-145	RNA binding motif protein 4.2 [Source:ZFIN;Acc:ZDB-GENE-030131-3019]	GO:0000381(regulation of alternative mRNA splicing, via spliceosome);GO:0003676(nucleic acid binding);GO:0003723(RNA binding);GO:0005634(nucleus);GO:0008270(zinc ion binding);GO:0016607(nuclear speck);GO:0045292(mRNA cis splicing, via spliceosome)	NA	NA	NA
0	ENSDARG00000012972	cfl1l	9.22028	6.98131	0.401314	0.919	0.842	3.69338e-149	1.02351e-144	cofilin 1 (non-muscle), like [Source:ZFIN;Acc:ZDB-GENE-040426-2770]	GO:0003779(actin binding);GO:0005622(intracellular);GO:0015629(actin cytoskeleton);GO:0030042(actin filament depolymerization)	04810(Regulation of actin cytoskeleton)	K05765	NA
0	ENSDARG00000057433	st6galnac5b	1.29664	0.894838	0.535082	0.326	0.258	4.3102e-149	1.19444e-144	ST6 (alpha-N-acetyl-neuraminyl-2,3-beta-galactosyl-1,3)-N-acetylgalactosaminide alpha-2,6-sialyltransferase 5b [Source:ZFIN;Acc:ZDB-GENE-040912-25]	GO:0005794(Golgi apparatus);GO:0006486(protein glycosylation);GO:0008373(sialyltransferase activity);GO:0016020(membrane);GO:0016021(integral component of membrane);GO:0016740(transferase activity);GO:0016757(transferase activity, transferring glycosyl groups);GO:0097503(sialylation)	NA	NA	NA
0	ENSDARG00000018111	kdm7aa	2.57892	1.97924	0.381822	0.603	0.597	1.64699e-148	4.56414e-144	lysine (K)-specific demethylase 7Aa [Source:ZFIN;Acc:ZDB-GENE-030131-9829]	GO:0005634(nucleus);GO:0006325(chromatin organization);GO:0007399(nervous system development);GO:0016491(oxidoreductase activity);GO:0016706(2-oxoglutarate-dependent dioxygenase activity);GO:0030901(midbrain development);GO:0032454(histone demethylase activity (H3-K9 specific));GO:0033169(histone H3-K9 demethylation);GO:0035574(histone H4-K20 demethylation);GO:0035575(histone demethylase activity…	NA	K11445	EC:1.14.11.-
0	ENSDARG00000036967	smox	6.80815	4.97622	0.452214	0.841	0.809	1.34161e-147	3.71788e-143	spermine oxidase [Source:ZFIN;Acc:ZDB-GENE-031201-3]	GO:0016491(oxidoreductase activity);GO:0030097(hemopoiesis);GO:0046208(spermine catabolic process);GO:0046592(polyamine oxidase activity);GO:0055114(oxidation-reduction process)	00330(Arginine and proline metabolism);00410(beta-Alanine metabolism)	K12259	1.5.3.-;EC:1.5.3.16
0	ENSDARG00000112454	FO744833.2	1.1029	0.831944	0.40674	0.287	0.274	2.42939e-147	6.73233e-143	poly [ADP-ribose] polymerase 14 [Source:NCBI gene;Acc:562648]	GO:0003676(nucleic acid binding);GO:0003950(NAD+ ADP-ribosyltransferase activity);GO:0016740(transferase activity);GO:0016757(transferase activity, transferring glycosyl groups)	NA	K15261	EC:2.4.2.30
0	ENSDARG00000059304	chchd2	1.6031	1.27608	0.329141	0.413	0.447	3.74447e-147	1.03767e-142	coiled-coil-helix-coiled-coil-helix domain containing 2 [Source:ZFIN;Acc:ZDB-GENE-040426-1737]	GO:0005634(nucleus);GO:0005739(mitochondrion);GO:0007005(mitochondrion organization)	NA	K22758	NA
0	ENSDARG00000024966	MARK4	1.44262	1.14489	0.33348	0.413	0.412	5.75842e-147	1.59577e-142	si:dkey-31m14.7 [Source:ZFIN;Acc:ZDB-GENE-121214-92]	GO:0000166(nucleotide binding);GO:0000226(microtubule cytoskeleton organization);GO:0004672(protein kinase activity);GO:0004674(protein serine/threonine kinase activity);GO:0005524(ATP binding);GO:0005737(cytoplasm);GO:0006468(protein phosphorylation);GO:0030010(establishment of cell polarity);GO:0035556(intracellular signal transduction);GO:0050321(tau-protein kinase activity)	NA	K08798	EC:2.7.11.1
0	ENSDARG00000024815	ogfrl2	0.889965	0.661357	0.428319	0.226	0.211	1.35404e-145	3.7523e-141	opioid growth factor receptor-like 2 [Source:ZFIN;Acc:ZDB-GENE-030616-523]	GO:0004985(opioid receptor activity);GO:0008150(biological_process);GO:0016020(membrane);GO:0038003(opioid receptor signaling pathway);GO:0038023(signaling receptor activity)	NA	NA	NA
0	ENSDARG00000095830	serpinb1l1	1.25252	1.04511	0.261182	0.38	0.414	1.68062e-145	4.65734e-141	serpin peptidase inhibitor, clade B (ovalbumin), member 1, like 1 [Source:ZFIN;Acc:ZDB-GENE-040715-5]	GO:0004867(serine-type endopeptidase inhibitor activity);GO:0005615(extracellular space);GO:0010951(negative regulation of endopeptidase activity)	NA	NA	NA
0	ENSDARG00000074771	ifngr1	2.84479	2.11059	0.43068	0.645	0.589	6.9273e-145	1.91969e-140	interferon gamma receptor 1 [Source:ZFIN;Acc:ZDB-GENE-081022-158]	GO:0004896(cytokine receptor activity);GO:0004904(interferon receptor activity);GO:0005515(protein binding);GO:0005886(plasma membrane);GO:0016020(membrane);GO:0016021(integral component of membrane);GO:0019221(cytokine-mediated signaling pathway);GO:0030097(hemopoiesis);GO:0098508(endothelial to hematopoietic transition)	NA	NA	NA
0	ENSDARG00000044760	gnaia	1.61713	1.30437	0.310087	0.432	0.452	9.77218e-145	2.70807e-140	guanine nucleotide binding protein (G protein), alpha inhibiting activity polypeptide a [Source:ZFIN;Acc:ZDB-GENE-030131-2229]	GO:0000166(nucleotide binding);GO:0001664(G protein-coupled receptor binding);GO:0003924(GTPase activity);GO:0005525(GTP binding);GO:0005834(heterotrimeric G-protein complex);GO:0007165(signal transduction);GO:0007186(G protein-coupled receptor signaling pathway);GO:0007188(adenylate cyclase-modulating G protein-coupled receptor signaling pathway);GO:0019001(guanyl nucleotide binding);GO:0031683(…	04261(Adrenergic signaling in cardiomyocytes);04371(Apelin signaling pathway);04540(Gap junction);04914(Progesterone-mediated oocyte maturation);04916(Melanogenesis)	K04630	NA
0	ENSDARG00000058225	arpc4l	5.82702	4.51167	0.369099	0.847	0.854	1.49981e-144	4.15627e-140	actin related protein 2/3 complex, subunit 4, like [Source:ZFIN;Acc:ZDB-GENE-040808-18]	GO:0003779(actin binding);GO:0005737(cytoplasm);GO:0005856(cytoskeleton);GO:0005885(Arp2/3 protein complex);GO:0015629(actin cytoskeleton);GO:0030041(actin filament polymerization);GO:0030833(regulation of actin filament polymerization);GO:0034314(Arp2/3 complex-mediated actin nucleation)	04144(Endocytosis);04810(Regulation of actin cytoskeleton);05132(Salmonella infection)	K05755	NA
0	ENSDARG00000102802	brdt	1.3723	1.02103	0.42657	0.353	0.333	6.28231e-144	1.74095e-139	bromodomain, testis-specific [Source:ZFIN;Acc:ZDB-GENE-030131-5928]	GO:0005515(protein binding)	NA	K11724	NA
0	ENSDARG00000068939	xaf1	1.26056	0.989909	0.348696	0.328	0.344	2.82647e-143	7.8327e-139	XIAP associated factor 1 [Source:ZFIN;Acc:ZDB-GENE-060929-840]	GO:0006915(apoptotic process);GO:0008270(zinc ion binding);GO:0046872(metal ion binding)	NA	NA	NA
0	ENSDARG00000018283	cyba	8.3349	6.12502	0.44445	0.915	0.902	7.91922e-143	2.19457e-138	cytochrome b-245, alpha polypeptide [Source:ZFIN;Acc:ZDB-GENE-040426-1526]	GO:0005886(plasma membrane);GO:0016020(membrane);GO:0016021(integral component of membrane);GO:0016175(superoxide-generating NADPH oxidase activity);GO:0016491(oxidoreductase activity);GO:0020037(heme binding);GO:0042554(superoxide anion generation);GO:0043020(NADPH oxidase complex);GO:0046872(metal ion binding);GO:0048246(macrophage chemotaxis);GO:0055114(oxidation-reduction process);GO:1990266(…	04145(Phagosome);04621(NOD-like receptor signaling pathway)	K08009	NA
0	ENSDARG00000041041	cxcr3.2	2.48853	1.85743	0.421989	0.516	0.526	7.31409e-142	2.02688e-137	chemokine (C-X-C motif) receptor 3, tandem duplicate 2 [Source:ZFIN;Acc:ZDB-GENE-041114-186]	GO:0002281(macrophage activation involved in immune response);GO:0002376(immune system process);GO:0002522(leukocyte migration involved in immune response);GO:0004930(G protein-coupled receptor activity);GO:0005886(plasma membrane);GO:0006935(chemotaxis);GO:0006955(immune response);GO:0007165(signal transduction);GO:0007186(G protein-coupled receptor signaling pathway);GO:0007204(positive regulat…	04060(Cytokine-cytokine receptor interaction)	K04188	NA
0	ENSDARG00000011449	fes	1.5724	1.26143	0.317909	0.398	0.431	4.22456e-141	1.17071e-136	FES proto-oncogene, tyrosine kinase [Source:ZFIN;Acc:ZDB-GENE-100812-10]	GO:0000166(nucleotide binding);GO:0004672(protein kinase activity);GO:0004713(protein tyrosine kinase activity);GO:0004715(non-membrane spanning protein tyrosine kinase activity);GO:0005524(ATP binding);GO:0005737(cytoplasm);GO:0005856(cytoskeleton);GO:0006468(protein phosphorylation);GO:0006935(chemotaxis);GO:0007155(cell adhesion);GO:0016301(kinase activity);GO:0016310(phosphorylation);GO:00167…	NA	K07527	EC:2.7.10.2
0	ENSDARG00000086337	si:dkey-102g19.3	9.10219	6.8569	0.408657	0.915	0.802	2.54806e-140	7.06119e-136	si:dkey-102g19.3 [Source:ZFIN;Acc:ZDB-GENE-091204-230]	NA	NA	NA	NA
0	ENSDARG00000056856	tax1bp1b	2.43185	1.80164	0.432748	0.537	0.516	5.4908e-140	1.52161e-135	Tax1 (human T-cell leukemia virus type I) binding protein 1b [Source:ZFIN;Acc:ZDB-GENE-030131-2872]	GO:0006915(apoptotic process);GO:0046872(metal ion binding)	04137(Mitophagy - animal)	K21347	NA
0	ENSDARG00000071251	ppp1r18	1.88922	1.56614	0.270573	0.499	0.544	1.22704e-139	3.40037e-135	protein phosphatase 1, regulatory subunit 18 [Source:ZFIN;Acc:ZDB-GENE-060503-350]	GO:0019902(phosphatase binding)	NA	K17559	NA
0	ENSDARG00000007347	degs1	2.07931	1.72289	0.271272	0.543	0.581	2.68157e-139	7.43116e-135	delta(4)-desaturase, sphingolipid 1 [Source:ZFIN;Acc:ZDB-GENE-030131-5283]	GO:0005783(endoplasmic reticulum);GO:0005789(endoplasmic reticulum membrane);GO:0006629(lipid metabolic process);GO:0016020(membrane);GO:0016021(integral component of membrane);GO:0016491(oxidoreductase activity);GO:0030148(sphingolipid biosynthetic process);GO:0042284(sphingolipid delta-4 desaturase activity);GO:0046513(ceramide biosynthetic process);GO:0055114(oxidation-reduction process)	00600(Sphingolipid metabolism)	K04712	1.14.18.5;EC:1.14.19.17
0	ENSDARG00000087152	sowahd	4.2559	3.18299	0.419081	0.789	0.756	8.30369e-139	2.30112e-134	sosondowah ankyrin repeat domain family d [Source:ZFIN;Acc:ZDB-GENE-120215-42]	GO:0005515(protein binding)	NA	NA	NA
0	ENSDARG00000000568	ell	3.54811	2.36652	0.584283	0.581	0.527	2.67196e-138	7.40453e-134	elongation factor RNA polymerase II [Source:ZFIN;Acc:ZDB-GENE-030131-3946]	GO:0001570(vasculogenesis);GO:0003746(translation elongation factor activity);GO:0006366(transcription by RNA polymerase II);GO:0006368(transcription elongation from RNA polymerase II promoter);GO:0006414(translational elongation);GO:0008023(transcription elongation factor complex);GO:0042795(snRNA transcription by RNA polymerase II)	NA	K15183	NA
0	ENSDARG00000030116	susd6	2.85577	2.18947	0.383301	0.629	0.615	3.12003e-138	8.64623e-134	sushi domain containing 6 [Source:ZFIN;Acc:ZDB-GENE-030131-8832]	GO:0003674(molecular_function);GO:0008150(biological_process);GO:0016020(membrane);GO:0016021(integral component of membrane)	NA	NA	NA
0	ENSDARG00000096959	si:dkey-29h14.10	1.71502	1.25793	0.447172	0.432	0.397	1.71262e-137	4.74601e-133	si:dkey-29h14.10 [Source:ZFIN;Acc:ZDB-GENE-131127-252]	GO:0042981(regulation of apoptotic process)	NA	NA	NA
0	ENSDARG00000052674	csnk1a1	3.44894	2.79565	0.302971	0.73	0.751	3.53064e-137	9.7841e-133	casein kinase 1, alpha 1 [Source:ZFIN;Acc:ZDB-GENE-020419-19]	GO:0000166(nucleotide binding);GO:0004672(protein kinase activity);GO:0004674(protein serine/threonine kinase activity);GO:0005524(ATP binding);GO:0005634(nucleus);GO:0005737(cytoplasm);GO:0006468(protein phosphorylation);GO:0007507(heart development);GO:0016055(Wnt signaling pathway);GO:0016301(kinase activity);GO:0016310(phosphorylation);GO:0018105(peptidyl-serine phosphorylation);GO:0018107(pe…	04310(Wnt signaling pathway);04340(Hedgehog signaling pathway)	K08957	EC:2.7.11.1
0	ENSDARG00000078547	si:ch211-264f5.2	10.0954	7.98372	0.33857	0.928	0.917	5.17454e-137	1.43397e-132	si:ch211-264f5.2 [Source:ZFIN;Acc:ZDB-GENE-080303-2]	GO:0016020(membrane);GO:0016021(integral component of membrane)	NA	NA	NA
0	ENSDARG00000013161	zgc:55558	1.84344	1.4902	0.306891	0.478	0.498	6.09874e-137	1.69008e-132	zgc:55558 [Source:ZFIN;Acc:ZDB-GENE-040426-740]	GO:0000166(nucleotide binding);GO:0003924(GTPase activity);GO:0005525(GTP binding);GO:0007165(signal transduction);GO:0016020(membrane)	04010(MAPK signaling pathway);04012(ErbB signaling pathway);04068(FoxO signaling pathway);04137(Mitophagy - animal);04140(Autophagy - animal);04150(mTOR signaling pathway);04210(Apoptosis);04218(Cellular senescence);04370(VEGF signaling pathway);04371(Apelin signaling pathway);04540(Gap junction);04625(C-type lectin receptor signaling pathway);04810(Regulation of actin cytoskeleton);04910(Insulin…	K07827	NA
0	ENSDARG00000015653	tnip1	1.75011	1.41134	0.310377	0.42	0.464	2.47514e-136	6.85911e-132	TNFAIP3 interacting protein 1 [Source:ZFIN;Acc:ZDB-GENE-070112-1502]	GO:0002755(MyD88-dependent toll-like receptor signaling pathway);GO:0043124(negative regulation of I-kappaB kinase/NF-kappaB signaling);GO:0050727(regulation of inflammatory response);GO:0070373(negative regulation of ERK1 and ERK2 cascade)	NA	NA	NA
0	ENSDARG00000094396	CR848841.1	3.80848	2.8296	0.428617	0.698	0.675	4.83507e-136	1.33989e-131	NA	NA	NA	NA	NA
0	ENSDARG00000074818	si:cabz01036022.1	2.43972	1.81829	0.424135	0.533	0.514	8.13585e-136	2.25461e-131	si:cabz01036022.1 [Source:ZFIN;Acc:ZDB-GENE-160113-144]	GO:0016020(membrane);GO:0016021(integral component of membrane)	NA	NA	NA
0	ENSDARG00000040445	si:ch211-219a4.3	0.846686	0.699298	0.275918	0.239	0.262	1.0673e-135	2.95771e-131	si:ch211-219a4.3 [Source:ZFIN;Acc:ZDB-GENE-070424-157]	GO:0003676(nucleic acid binding);GO:0003723(RNA binding);GO:0003950(NAD+ ADP-ribosyltransferase activity);GO:0016740(transferase activity);GO:0016757(transferase activity, transferring glycosyl groups)	NA	K15261	EC:2.4.2.30
0	ENSDARG00000092693	tpt1	37.8696	31.5987	0.261173	0.999	0.994	1.36251e-135	3.77578e-131	tumor protein, translationally-controlled 1 [Source:ZFIN;Acc:ZDB-GENE-990603-10]	GO:0005509(calcium ion binding);GO:0005737(cytoplasm)	NA	NA	NA
0	ENSDARG00000111188	cdaa	6.71881	4.70839	0.51297	0.789	0.618	2.38099e-135	6.59821e-131	cytidine deaminase a [Source:ZFIN;Acc:ZDB-GENE-170609-2]	GO:0003824(catalytic activity);GO:0004126(cytidine deaminase activity);GO:0008270(zinc ion binding);GO:0009972(cytidine deamination);GO:0016787(hydrolase activity);GO:0046872(metal ion binding)	00240(Pyrimidine metabolism);00983(Drug metabolism - other enzymes)	K01489	EC:3.5.4.5
0	ENSDARG00000042816	mmp9	20.7564	13.4334	0.627738	0.771	0.673	6.09511e-135	1.68908e-130	matrix metallopeptidase 9 [Source:ZFIN;Acc:ZDB-GENE-040426-2132]	GO:0001503(ossification);GO:0002633(positive regulation of granuloma formation);GO:0004222(metalloendopeptidase activity);GO:0005615(extracellular space);GO:0006508(proteolysis);GO:0008233(peptidase activity);GO:0008237(metallopeptidase activity);GO:0008270(zinc ion binding);GO:0009617(response to bacterium);GO:0016787(hydrolase activity);GO:0030198(extracellular matrix organization);GO:0030199(c…	NA	K01403	EC:3.4.24.35
0	ENSDARG00000074378	junba	4.67396	3.28176	0.510177	0.719	0.671	1.42983e-134	3.96234e-130	JunB proto-oncogene, AP-1 transcription factor subunit a [Source:ZFIN;Acc:ZDB-GENE-040426-2172]	GO:0000122(negative regulation of transcription by RNA polymerase II);GO:0000790(nuclear chromatin);GO:0000978(RNA polymerase II proximal promoter sequence-specific DNA binding);GO:0000981(DNA-binding transcription factor activity, RNA polymerase II-specific);GO:0001945(lymph vessel development);GO:0003677(DNA binding);GO:0003700(DNA-binding transcription factor activity);GO:0003713(transcription…	NA	K09028	NA
0	ENSDARG00000016457	irf9	0.631776	0.518446	0.285218	0.196	0.198	3.61057e-134	1.00056e-129	interferon regulatory factor 9 [Source:ZFIN;Acc:ZDB-GENE-040912-165]	GO:0000981(DNA-binding transcription factor activity, RNA polymerase II-specific);GO:0002376(immune system process);GO:0003700(DNA-binding transcription factor activity);GO:0005515(protein binding);GO:0005634(nucleus);GO:0006355(regulation of transcription, DNA-templated);GO:0006357(regulation of transcription by RNA polymerase II);GO:0044212(transcription regulatory region DNA binding)	04217(Necroptosis);04621(NOD-like receptor signaling pathway);04625(C-type lectin receptor signaling pathway);05168(Herpes simplex virus 1 infection)	K04693	NA
0	ENSDARG00000104325	plek	6.31656	4.54876	0.473666	0.803	0.801	1.03002e-132	2.85439e-128	pleckstrin [Source:ZFIN;Acc:ZDB-GENE-040426-1506]	GO:0005886(plasma membrane);GO:0031532(actin cytoskeleton reorganization);GO:0035556(intracellular signal transduction)	NA	K19993	NA
0	ENSDARG00000099430	atg16l1	6.87104	5.16568	0.411572	0.844	0.807	1.40683e-131	3.89862e-127	ATG16 autophagy related 16-like 1 (S. cerevisiae) [Source:ZFIN;Acc:ZDB-GENE-050417-401]	GO:0000045(autophagosome assembly);GO:0000421(autophagosome membrane);GO:0003674(molecular_function);GO:0005515(protein binding);GO:0039689(negative stranded viral RNA replication)	04136(Autophagy - other);04140(Autophagy - animal);04621(NOD-like receptor signaling pathway)	K17890	NA
0	ENSDARG00000078775	RASA2	2.33902	1.79346	0.383162	0.518	0.531	1.62631e-131	4.50684e-127	RAS p21 protein activator 2 [Source:NCBI gene;Acc:100331895]	GO:0005096(GTPase activator activity);GO:0005543(phospholipid binding);GO:0007165(signal transduction);GO:0035556(intracellular signal transduction);GO:0043087(regulation of GTPase activity);GO:0043547(positive regulation of GTPase activity);GO:0046580(negative regulation of Ras protein signal transduction)	04010(MAPK signaling pathway)	K08053	NA
0	ENSDARG00000105481	si:ch211-243a20.4	3.18383	2.3396	0.444505	0.631	0.594	2.1161e-131	5.86413e-127	si:ch211-243a20.4 [Source:ZFIN;Acc:ZDB-GENE-061207-29]	GO:0001819(positive regulation of cytokine production);GO:0004888(transmembrane signaling receptor activity);GO:0016020(membrane);GO:0016021(integral component of membrane);GO:0045577(regulation of B cell differentiation);GO:0050861(positive regulation of B cell receptor signaling pathway)	NA	NA	NA
0	ENSDARG00000013681	si:dkey-42i9.6	1.19102	0.991344	0.264738	0.345	0.371	3.15965e-131	8.75604e-127	si:dkey-42i9.6 [Source:ZFIN;Acc:ZDB-GENE-030131-6596]	GO:0016020(membrane);GO:0016021(integral component of membrane)	04115(p53 signaling pathway)	K10135	NA
0	ENSDARG00000061841	tiparp	2.56443	1.69549	0.596935	0.474	0.393	3.87666e-131	1.0743e-126	TCDD-inducible poly(ADP-ribose) polymerase [Source:ZFIN;Acc:ZDB-GENE-031002-47]	GO:0003950(NAD+ ADP-ribosyltransferase activity);GO:0005575(cellular_component);GO:0008270(zinc ion binding);GO:0046872(metal ion binding);GO:0071466(cellular response to xenobiotic stimulus)	NA	K15259	EC:2.4.2.30
0	ENSDARG00000098443	zfand6	3.70884	2.94643	0.332	0.715	0.722	1.2438e-130	3.44681e-126	zinc finger, AN1-type domain 6 [Source:ZFIN;Acc:ZDB-GENE-030131-8405]	GO:0003677(DNA binding);GO:0005575(cellular_component);GO:0008270(zinc ion binding);GO:0046872(metal ion binding)	NA	NA	NA
0	ENSDARG00000003017	ube2al	3.47028	2.48413	0.48231	0.633	0.613	1.49443e-130	4.14137e-126	ubiquitin conjugating enzyme E2 A, like [Source:ZFIN;Acc:ZDB-GENE-030131-4195]	GO:0000166(nucleotide binding);GO:0000209(protein polyubiquitination);GO:0000790(nuclear chromatin);GO:0005524(ATP binding);GO:0006281(DNA repair);GO:0016740(transferase activity);GO:0033503(HULC complex);GO:0043161(proteasome-mediated ubiquitin-dependent protein catabolic process);GO:0061631(ubiquitin conjugating enzyme activity)	04120(Ubiquitin mediated proteolysis)	K10573	EC:2.3.2.23
0	ENSDARG00000013310	map3k15	2.40317	1.85261	0.375384	0.531	0.521	1.90172e-130	5.27004e-126	mitogen-activated protein kinase kinase kinase 15 [Source:ZFIN;Acc:ZDB-GENE-091204-246]	GO:0000165(MAPK cascade);GO:0000166(nucleotide binding);GO:0000186(activation of MAPKK activity);GO:0004672(protein kinase activity);GO:0004709(MAP kinase kinase kinase activity);GO:0005524(ATP binding);GO:0006468(protein phosphorylation);GO:0016301(kinase activity);GO:0016310(phosphorylation);GO:0016740(transferase activity)	NA	K13986	EC:2.7.11.25
0	ENSDARG00000052322	tlr5b	10.2243	7.81534	0.387617	0.876	0.816	5.33615e-130	1.47875e-125	toll-like receptor 5b [Source:ZFIN;Acc:ZDB-GENE-040219-15]	GO:0002253(activation of immune response);GO:0002376(immune system process);GO:0005515(protein binding);GO:0007165(signal transduction);GO:0016020(membrane);GO:0016021(integral component of membrane);GO:0035325(Toll-like receptor binding);GO:0045087(innate immune response);GO:0046982(protein heterodimerization activity)	04620(Toll-like receptor signaling pathway);05132(Salmonella infection)	K10168	NA
0	ENSDARG00000012513	sdcbp2	11.0221	8.15208	0.435156	0.953	0.938	2.34345e-129	6.49416e-125	syndecan binding protein (syntenin) 2 [Source:ZFIN;Acc:ZDB-GENE-030131-3727]	GO:0001666(response to hypoxia);GO:0005515(protein binding);GO:0005737(cytoplasm);GO:0005886(plasma membrane);GO:0007268(chemical synaptic transmission);GO:0007416(synapse assembly);GO:0030036(actin cytoskeleton organization);GO:0035556(intracellular signal transduction);GO:0042246(tissue regeneration);GO:0043325(phosphatidylinositol-3,4-bisphosphate binding);GO:0045545(syndecan binding);GO:00551…	NA	K17254	NA
0	ENSDARG00000076229	mrtfab	3.20146	2.62878	0.284336	0.627	0.67	2.2133e-128	6.13349e-124	myocardin related transcription factor Ab [Source:ZFIN;Acc:ZDB-GENE-030131-681]	GO:0003713(transcription coactivator activity);GO:0003779(actin binding);GO:0003785(actin monomer binding);GO:0004864(protein phosphatase inhibitor activity);GO:0005634(nucleus);GO:0005737(cytoplasm);GO:0010735(positive regulation of transcription via serum response element binding);GO:0032515(negative regulation of phosphoprotein phosphatase activity);GO:0051145(smooth muscle cell differentiatio…	NA	K22525	NA
0	ENSDARG00000024940	rnf144b	2.07773	1.71551	0.27637	0.483	0.534	3.13613e-128	8.69086e-124	ring finger protein 144B [Source:ZFIN;Acc:ZDB-GENE-040426-1292]	GO:0000151(ubiquitin ligase complex);GO:0000209(protein polyubiquitination);GO:0004842(ubiquitin-protein transferase activity);GO:0005737(cytoplasm);GO:0006511(ubiquitin-dependent protein catabolic process);GO:0016020(membrane);GO:0016021(integral component of membrane);GO:0016567(protein ubiquitination);GO:0016740(transferase activity);GO:0031624(ubiquitin conjugating enzyme binding);GO:0032436(…	NA	K11975	EC:2.3.2.31
0	ENSDARG00000101385	f8	3.48603	2.39225	0.543222	0.631	0.544	4.0356e-128	1.11835e-123	coagulation factor VIII, procoagulant component [Source:ZFIN;Acc:ZDB-GENE-090629-2]	GO:0005507(copper ion binding);GO:0007596(blood coagulation);GO:0016491(oxidoreductase activity);GO:0030168(platelet activation);GO:0046872(metal ion binding);GO:0055114(oxidation-reduction process)	NA	NA	NA
0	ENSDARG00000018146	gpx1a	4.72954	3.28219	0.527043	0.735	0.626	4.73748e-128	1.31285e-123	glutathione peroxidase 1a [Source:ZFIN;Acc:ZDB-GENE-030410-1]	GO:0004601(peroxidase activity);GO:0004602(glutathione peroxidase activity);GO:0005739(mitochondrion);GO:0005829(cytosol);GO:0006749(glutathione metabolic process);GO:0006979(response to oxidative stress);GO:0010269(response to selenium ion);GO:0016491(oxidoreductase activity);GO:0042542(response to hydrogen peroxide);GO:0042744(hydrogen peroxide catabolic process);GO:0055114(oxidation-reduction …	00480(Glutathione metabolism);00590(Arachidonic acid metabolism)	K00432	EC:1.11.1.9
0	ENSDARG00000044339	rp2	1.5398	1.22663	0.328042	0.365	0.405	1.74639e-127	4.83958e-123	RP2, ARL3 GTPase activating protein [Source:ZFIN;Acc:ZDB-GENE-040426-2795]	GO:0000166(nucleotide binding);GO:0000902(cell morphogenesis);GO:0001947(heart looping);GO:0005096(GTPase activator activity);GO:0005525(GTP binding);GO:0005886(plasma membrane);GO:0005929(cilium);GO:0010842(retina layer formation);GO:0015031(protein transport);GO:0016020(membrane);GO:0035845(photoreceptor cell outer segment organization);GO:0042461(photoreceptor cell development);GO:0042995(cell…	NA	K18272	NA
0	ENSDARG00000016188	SBNO2	2.41049	1.96868	0.292099	0.555	0.582	2.72961e-127	7.5643e-123	si:ch73-63e15.2 [Source:ZFIN;Acc:ZDB-GENE-091204-463]	GO:0005634(nucleus);GO:0006355(regulation of transcription, DNA-templated);GO:0050727(regulation of inflammatory response)	NA	NA	NA
0	ENSDARG00000090625	si:ch73-248e21.1	3.32941	2.03095	0.71311	0.442	0.365	1.82535e-126	5.0584e-122	si:ch73-248e21.1 [Source:ZFIN;Acc:ZDB-GENE-120215-198]	NA	NA	NA	NA
0	ENSDARG00000102221	HACD4	3.82855	3.11827	0.296054	0.714	0.747	3.58605e-126	9.93765e-122	si:ch73-41h24.1 [Source:ZFIN;Acc:ZDB-GENE-030131-3627]	GO:0005783(endoplasmic reticulum);GO:0005789(endoplasmic reticulum membrane);GO:0006629(lipid metabolic process);GO:0006631(fatty acid metabolic process);GO:0006633(fatty acid biosynthetic process);GO:0016020(membrane);GO:0016021(integral component of membrane);GO:0016829(lyase activity);GO:0018812(3-hydroxyacyl-CoA dehydratase activity);GO:0030148(sphingolipid biosynthetic process);GO:0030497(fa…	00062(Fatty acid elongation);01040(Biosynthesis of unsaturated fatty acids)	K10703	EC:4.2.1.134
0	ENSDARG00000039914	gapdhs	18.0178	14.2479	0.338678	0.994	0.977	5.20733e-126	1.44306e-121	glyceraldehyde-3-phosphate dehydrogenase, spermatogenic [Source:ZFIN;Acc:ZDB-GENE-020913-1]	GO:0000166(nucleotide binding);GO:0004365(glyceraldehyde-3-phosphate dehydrogenase (NAD+) (phosphorylating) activity);GO:0006006(glucose metabolic process);GO:0006096(glycolytic process);GO:0016491(oxidoreductase activity);GO:0016620(oxidoreductase activity, acting on the aldehyde or oxo group of donors, NAD or NADP as acceptor);GO:0050661(NADP binding);GO:0051287(NAD binding);GO:0055114(oxidatio…	00010(Glycolysis / Gluconeogenesis)	K10705	EC:1.2.1.12
0	ENSDARG00000006251	ell2	1.02122	0.754846	0.43604	0.226	0.22	6.64682e-126	1.84197e-121	elongation factor, RNA polymerase II, 2 [Source:ZFIN;Acc:ZDB-GENE-030131-1717]	GO:0006368(transcription elongation from RNA polymerase II promoter);GO:0008023(transcription elongation factor complex)	NA	K15183	NA
0	ENSDARG00000090844	CABZ01054965.1	1.10813	0.771999	0.521459	0.253	0.2	3.52119e-125	9.75793e-121	interleukin-1 receptor type 1-like [Source:NCBI gene;Acc:799279]	GO:0005515(protein binding);GO:0007165(signal transduction)	NA	NA	NA
0	ENSDARG00000036161	hnrnpa0l.1	13.4628	10.5992	0.345013	0.984	0.968	2.02015e-124	5.59825e-120	heterogeneous nuclear ribonucleoprotein A0, like [Source:ZFIN;Acc:ZDB-GENE-030131-618]	GO:0003676(nucleic acid binding);GO:0003723(RNA binding)	NA	NA	NA
0	ENSDARG00000076144	si:ch211-74m13.3	1.36894	0.917065	0.577966	0.31	0.228	2.6872e-124	7.44677e-120	si:ch211-74m13.3 [Source:ZFIN;Acc:ZDB-GENE-060503-219]	GO:0016020(membrane);GO:0016021(integral component of membrane);GO:0098609(cell-cell adhesion)	NA	NA	NA
0	ENSDARG00000100383	il10ra	3.56351	2.65074	0.426906	0.633	0.615	2.66841e-123	7.39471e-119	interleukin 10 receptor, alpha [Source:ZFIN;Acc:ZDB-GENE-070905-4]	GO:0004896(cytokine receptor activity);GO:0005515(protein binding);GO:0005886(plasma membrane);GO:0016020(membrane);GO:0016021(integral component of membrane);GO:0019221(cytokine-mediated signaling pathway)	NA	NA	NA
0	ENSDARG00000056623	ptenb	1.14031	0.937352	0.282762	0.336	0.343	8.39014e-123	2.32508e-118	phosphatase and tensin homolog B [Source:ZFIN;Acc:ZDB-GENE-030616-47]	GO:0001568(blood vessel development);GO:0002275(myeloid cell activation involved in immune response);GO:0004438(phosphatidylinositol-3-phosphatase activity);GO:0004721(phosphoprotein phosphatase activity);GO:0004725(protein tyrosine phosphatase activity);GO:0005634(nucleus);GO:0005737(cytoplasm);GO:0006470(protein dephosphorylation);GO:0006629(lipid metabolic process);GO:0007399(nervous system de…	00562(Inositol phosphate metabolism);04068(FoxO signaling pathway);04070(Phosphatidylinositol signaling system);04115(p53 signaling pathway);04140(Autophagy - animal);04150(mTOR signaling pathway);04218(Cellular senescence);04510(Focal adhesion)	K01110	3.1.3.48;3.1.3.67;EC:3.1.3.16
0	ENSDARG00000001950	ak1	1.7629	1.45157	0.28034	0.476	0.488	8.19677e-122	2.27149e-117	adenylate kinase 1 [Source:ZFIN;Acc:ZDB-GENE-040822-37]	GO:0000166(nucleotide binding);GO:0004017(adenylate kinase activity);GO:0004550(nucleoside diphosphate kinase activity);GO:0005524(ATP binding);GO:0005737(cytoplasm);GO:0006139(nucleobase-containing compound metabolic process);GO:0006165(nucleoside diphosphate phosphorylation);GO:0006172(ADP biosynthetic process);GO:0009142(nucleoside triphosphate biosynthetic process);GO:0016301(kinase activity)…	00230(Purine metabolism);00730(Thiamine metabolism)	K00939	EC:2.7.4.3
0	ENSDARG00000069432	plscr3b	1.7994	1.40305	0.358946	0.456	0.452	1.10191e-121	3.05361e-117	phospholipid scramblase 3b [Source:ZFIN;Acc:ZDB-GENE-040426-2517]	GO:0017121(plasma membrane phospholipid scrambling);GO:0017128(phospholipid scramblase activity)	NA	NA	NA
0	ENSDARG00000011665	aldoaa	8.06836	6.24599	0.369346	0.907	0.899	1.12711e-121	3.12345e-117	aldolase a, fructose-bisphosphate, a [Source:ZFIN;Acc:ZDB-GENE-030131-8369]	GO:0001756(somitogenesis);GO:0001966(thigmotaxis);GO:0003824(catalytic activity);GO:0004332(fructose-bisphosphate aldolase activity);GO:0006096(glycolytic process);GO:0007409(axonogenesis);GO:0007420(brain development);GO:0016829(lyase activity);GO:0043473(pigmentation)	00010(Glycolysis / Gluconeogenesis);00030(Pentose phosphate pathway);00051(Fructose and mannose metabolism)	K01623	EC:4.1.2.13
0	ENSDARG00000020625	jak1	3.80035	3.01987	0.331647	0.695	0.724	7.98413e-121	2.21256e-116	Janus kinase 1 [Source:ZFIN;Acc:ZDB-GENE-980526-142]	GO:0000166(nucleotide binding);GO:0004672(protein kinase activity);GO:0004713(protein tyrosine kinase activity);GO:0004715(non-membrane spanning protein tyrosine kinase activity);GO:0005524(ATP binding);GO:0005856(cytoskeleton);GO:0006468(protein phosphorylation);GO:0016020(membrane);GO:0016301(kinase activity);GO:0016310(phosphorylation);GO:0016740(transferase activity);GO:0018108(peptidyl-tyros…	04217(Necroptosis);04621(NOD-like receptor signaling pathway);05168(Herpes simplex virus 1 infection)	K11217	EC:2.7.10.2
0	ENSDARG00000078824	si:ch211-66e2.3	3.78288	2.85081	0.408112	0.73	0.656	8.22073e-121	2.27813e-116	si:ch211-66e2.3 [Source:ZFIN;Acc:ZDB-GENE-080226-7]	GO:0016020(membrane);GO:0098609(cell-cell adhesion)	NA	NA	NA
0	ENSDARG00000044852	wbp2nl	11.0095	8.81954	0.319972	0.959	0.953	1.56549e-120	4.33827e-116	WBP2 N-terminal like [Source:ZFIN;Acc:ZDB-GENE-030131-4012]	GO:0003713(transcription coactivator activity);GO:0005634(nucleus);GO:0007343(egg activation);GO:0031490(chromatin DNA binding);GO:0033011(perinuclear theca);GO:0035038(female pronucleus assembly);GO:0035039(male pronucleus assembly);GO:0050699(WW domain binding);GO:1903508(positive regulation of nucleic acid-templated transcription)	NA	K22532	NA
0	ENSDARG00000071384	slc7a11	6.33082	4.58163	0.466532	0.797	0.745	9.50586e-120	2.63426e-115	solute carrier family 7 (anionic amino acid transporter light chain, xc- system), member 11 [Source:ZFIN;Acc:ZDB-GENE-150416-1]	GO:0015179(L-amino acid transmembrane transporter activity);GO:0016020(membrane);GO:0016021(integral component of membrane);GO:0022857(transmembrane transporter activity);GO:0055085(transmembrane transport);GO:1902475(L-alpha-amino acid transmembrane transport)	04216(Ferroptosis)	K13869	NA
0	ENSDARG00000094012	si:dkey-192g7.3	3.22	2.55987	0.330993	0.664	0.676	9.74999e-120	2.70192e-115	si:dkey-192g7.3 [Source:ZFIN;Acc:ZDB-GENE-070912-411]	GO:0005102(signaling receptor binding);GO:0009897(external side of plasma membrane);GO:0016020(membrane);GO:0016021(integral component of membrane);GO:0050776(regulation of immune response);GO:0050852(T cell receptor signaling pathway)	NA	NA	NA
0	ENSDARG00000098853	ehd1a	3.62933	2.80017	0.37419	0.662	0.653	1.56333e-119	4.3323e-115	EH-domain containing 1a [Source:ZFIN;Acc:ZDB-GENE-040426-2518]	GO:0005509(calcium ion binding);GO:0005515(protein binding);GO:0005525(GTP binding);GO:0005575(cellular_component);GO:0005623(cell);GO:0032456(endocytic recycling);GO:0060271(cilium assembly)	04144(Endocytosis)	K12483	NA
0	ENSDARG00000012688	eif1b	8.16918	6.25807	0.384473	0.931	0.921	8.12586e-119	2.25184e-114	eukaryotic translation initiation factor 1B [Source:ZFIN;Acc:ZDB-GENE-030131-956]	GO:0003723(RNA binding);GO:0003743(translation initiation factor activity);GO:0006413(translational initiation);GO:0016282(eukaryotic 43S preinitiation complex);GO:0043024(ribosomal small subunit binding)	03013(RNA transport)	K03113	NA
0	ENSDARG00000036785	si:ch211-226m16.2	1.23978	1.00807	0.298498	0.368	0.36	2.27889e-118	6.31526e-114	si:ch211-226m16.2 [Source:ZFIN;Acc:ZDB-GENE-030131-2302]	GO:0004568(chitinase activity);GO:0005576(extracellular region);GO:0005615(extracellular space);GO:0005737(cytoplasm);GO:0005975(carbohydrate metabolic process);GO:0006032(chitin catabolic process);GO:0008061(chitin binding);GO:0045766(positive regulation of angiogenesis)	NA	NA	NA
0	ENSDARG00000035858	cnn2	2.01004	1.6747	0.263325	0.515	0.545	2.85948e-118	7.9242e-114	calponin 2 [Source:ZFIN;Acc:ZDB-GENE-030131-542]	GO:0003779(actin binding);GO:0005515(protein binding);GO:0005516(calmodulin binding);GO:0005856(cytoskeleton);GO:0007010(cytoskeleton organization);GO:0031032(actomyosin structure organization);GO:0043408(regulation of MAPK cascade);GO:0043535(regulation of blood vessel endothelial cell migration);GO:0048545(response to steroid hormone)	NA	NA	NA
0	ENSDARG00000088040	si:dkeyp-27c8.2	3.71739	2.72285	0.449174	0.649	0.632	8.27085e-118	2.29202e-113	si:dkeyp-27c8.2 [Source:ZFIN;Acc:ZDB-GENE-090311-51]	GO:0016311(dephosphorylation);GO:0016791(phosphatase activity)	NA	K17619	3.1.3.-;EC:3.1.3.48
0	ENSDARG00000025797	abhd2a	1.50789	1.25863	0.26068	0.429	0.442	9.22584e-118	2.55666e-113	abhydrolase domain containing 2a [Source:ZFIN;Acc:ZDB-GENE-040426-784]	GO:0003707(steroid hormone receptor activity);GO:0005886(plasma membrane);GO:0006629(lipid metabolic process);GO:0016020(membrane);GO:0016021(integral component of membrane);GO:0016042(lipid catabolic process);GO:0016298(lipase activity);GO:0016787(hydrolase activity);GO:0032570(response to progesterone);GO:0034338(short-chain carboxylesterase activity);GO:0036126(sperm flagellum);GO:0042562(horm…	NA	K13697	NA
0	ENSDARG00000010752	acsl4b	2.31966	1.8588	0.319541	0.528	0.544	9.39397e-118	2.60326e-113	acyl-CoA synthetase long chain family member 4b [Source:ZFIN;Acc:ZDB-GENE-030131-6493]	GO:0000398(mRNA splicing, via spliceosome);GO:0003824(catalytic activity);GO:0005681(spliceosomal complex)	00061(Fatty acid biosynthesis);00071(Fatty acid degradation);03320(PPAR signaling pathway);04146(Peroxisome);04216(Ferroptosis);04920(Adipocytokine signaling pathway)	K01897	EC:6.2.1.3
0	ENSDARG00000086762	gsdmea	2.24832	1.45419	0.628626	0.411	0.318	9.42799e-118	2.61269e-113	gasdermin Ea [Source:ZFIN;Acc:ZDB-GENE-120215-186]	NA	NA	NA	NA
0	ENSDARG00000002344	tubb4b	18.0725	14.1116	0.356913	0.982	0.966	1.25935e-117	3.4899e-113	tubulin, beta 4B class IVb [Source:ZFIN;Acc:ZDB-GENE-030131-8625]	GO:0000166(nucleotide binding);GO:0000226(microtubule cytoskeleton organization);GO:0000278(mitotic cell cycle);GO:0003924(GTPase activity);GO:0005200(structural constituent of cytoskeleton);GO:0005525(GTP binding);GO:0005737(cytoplasm);GO:0005856(cytoskeleton);GO:0005874(microtubule);GO:0007017(microtubule-based process);GO:0060271(cilium assembly)	04145(Phagosome);04540(Gap junction)	K07375	NA
0	ENSDARG00000070669	cxcr3.3	5.12078	3.81022	0.426489	0.716	0.689	2.36058e-117	6.54165e-113	chemokine (C-X-C motif) receptor 3, tandem duplicate 3 [Source:ZFIN;Acc:ZDB-GENE-100922-34]	GO:0002685(regulation of leukocyte migration);GO:0004930(G protein-coupled receptor activity);GO:0006935(chemotaxis);GO:0006954(inflammatory response);GO:0006955(immune response);GO:0007186(G protein-coupled receptor signaling pathway);GO:0007204(positive regulation of cytosolic calcium ion concentration);GO:0009897(external side of plasma membrane);GO:0016020(membrane);GO:0016021(integral compon…	NA	NA	NA
0	ENSDARG00000098761	rgs2	20.9405	15.572	0.427341	0.935	0.856	2.42498e-117	6.72012e-113	regulator of G protein signaling 2 [Source:ZFIN;Acc:ZDB-GENE-040718-410]	GO:0005096(GTPase activator activity);GO:0007186(G protein-coupled receptor signaling pathway);GO:0014032(neural crest cell development);GO:0043547(positive regulation of GTPase activity);GO:0090301(negative regulation of neural crest formation)	NA	K16449	NA
0	ENSDARG00000043130	notch2	1.40691	1.16516	0.27201	0.39	0.403	9.8369e-117	2.726e-112	notch 2 [Source:ZFIN;Acc:ZDB-GENE-000329-4]	GO:0001889(liver development);GO:0001944(vasculature development);GO:0001946(lymphangiogenesis);GO:0005509(calcium ion binding);GO:0005515(protein binding);GO:0006355(regulation of transcription, DNA-templated);GO:0007219(Notch signaling pathway);GO:0007275(multicellular organism development);GO:0016020(membrane);GO:0016021(integral component of membrane);GO:0030154(cell differentiation);GO:00310…	04330(Notch signaling pathway)	K20994	NA
0	ENSDARG00000000489	upf3b	0.669965	0.553229	0.27621	0.116	0.174	1.09415e-116	3.03211e-112	UPF3B, regulator of nonsense mediated mRNA decay [Source:ZFIN;Acc:ZDB-GENE-040426-1630]	GO:0000184(nuclear-transcribed mRNA catabolic process, nonsense-mediated decay);GO:0003676(nucleic acid binding);GO:0003729(mRNA binding);GO:0005730(nucleolus);GO:0005737(cytoplasm);GO:0045727(positive regulation of translation)	03013(RNA transport);03015(mRNA surveillance pathway)	K14328	NA
0	ENSDARG00000089368	hopx	2.9267	2.35134	0.315787	0.597	0.625	1.19389e-116	3.30851e-112	HOP homeobox [Source:ZFIN;Acc:ZDB-GENE-031016-2]	GO:0003677(DNA binding);GO:0005634(nucleus);GO:0005737(cytoplasm);GO:0007275(multicellular organism development);GO:0007507(heart development);GO:0030154(cell differentiation)	NA	NA	NA
0	ENSDARG00000078619	pnp5a	36.2618	27.879	0.379268	0.988	0.982	4.34695e-116	1.20463e-111	purine nucleoside phosphorylase 5a [Source:ZFIN;Acc:ZDB-GENE-040426-2553]	GO:0003824(catalytic activity);GO:0004731(purine-nucleoside phosphorylase activity);GO:0005737(cytoplasm);GO:0006139(nucleobase-containing compound metabolic process);GO:0009116(nucleoside metabolic process);GO:0016740(transferase activity);GO:0016757(transferase activity, transferring glycosyl groups)	00230(Purine metabolism);00240(Pyrimidine metabolism);00760(Nicotinate and nicotinamide metabolism)	K03783	EC:2.4.2.1
0	ENSDARG00000077130	bcl10	5.28409	3.91717	0.431843	0.773	0.726	1.38049e-115	3.8256e-111	BCL10, immune signaling adaptor [Source:ZFIN;Acc:ZDB-GENE-100219-2]	GO:0005737(cytoplasm);GO:0006915(apoptotic process);GO:0032449(CBM complex);GO:0042981(regulation of apoptotic process);GO:0051092(positive regulation of NF-kappaB transcription factor activity)	04625(C-type lectin receptor signaling pathway)	K07368	NA
0	ENSDARG00000058647	hck	4.3372	3.42174	0.342033	0.748	0.762	1.80952e-114	5.01455e-110	HCK proto-oncogene, Src family tyrosine kinase [Source:ZFIN;Acc:ZDB-GENE-090313-72]	GO:0000166(nucleotide binding);GO:0004672(protein kinase activity);GO:0004713(protein tyrosine kinase activity);GO:0004715(non-membrane spanning protein tyrosine kinase activity);GO:0005102(signaling receptor binding);GO:0005515(protein binding);GO:0005524(ATP binding);GO:0006468(protein phosphorylation);GO:0007169(transmembrane receptor protein tyrosine kinase signaling pathway);GO:0016301(kinas…	NA	K08893	EC:2.7.10.2
0	ENSDARG00000093124	scpp8	11.0426	8.50439	0.376803	0.868	0.77	2.92965e-114	8.11864e-110	secretory calcium-binding phosphoprotein 8 [Source:ZFIN;Acc:ZDB-GENE-090424-2]	NA	NA	NA	NA
0	ENSDARG00000039082	zgc:123010	1.05271	0.822514	0.356001	0.296	0.265	5.3858e-114	1.49251e-109	zgc:123010 [Source:ZFIN;Acc:ZDB-GENE-051120-15]	GO:0003676(nucleic acid binding);GO:0003723(RNA binding);GO:0005515(protein binding);GO:0005575(cellular_component);GO:0008150(biological_process);GO:0046872(metal ion binding)	NA	NA	NA
0	ENSDARG00000031647	stat2	2.55197	2.00273	0.34964	0.517	0.551	6.01015e-114	1.66553e-109	signal transducer and activator of transcription 2 [Source:ZFIN;Acc:ZDB-GENE-080321-1]	GO:0003677(DNA binding);GO:0003700(DNA-binding transcription factor activity);GO:0005634(nucleus);GO:0005737(cytoplasm);GO:0006355(regulation of transcription, DNA-templated);GO:0007165(signal transduction)	NA	NA	NA
0	ENSDARG00000100515	dusp1	5.36371	4.03657	0.410099	0.744	0.712	1.34873e-111	3.73759e-107	dual specificity phosphatase 1 [Source:ZFIN;Acc:ZDB-GENE-040426-2018]	GO:0000188(inactivation of MAPK activity);GO:0004721(phosphoprotein phosphatase activity);GO:0004725(protein tyrosine phosphatase activity);GO:0005634(nucleus);GO:0005737(cytoplasm);GO:0006470(protein dephosphorylation);GO:0008138(protein tyrosine/serine/threonine phosphatase activity);GO:0016311(dephosphorylation);GO:0016787(hydrolase activity);GO:0016791(phosphatase activity);GO:0017017(MAP kin…	04010(MAPK signaling pathway)	K21278	3.1.3.48;EC:3.1.3.16
0	ENSDARG00000074782	adgrg3	4.42785	3.48142	0.346931	0.753	0.712	1.90699e-110	5.28465e-106	adhesion G protein-coupled receptor G3 [Source:ZFIN;Acc:ZDB-GENE-140106-110]	GO:0004888(transmembrane signaling receptor activity);GO:0004930(G protein-coupled receptor activity);GO:0005887(integral component of plasma membrane);GO:0007166(cell surface receptor signaling pathway);GO:0007186(G protein-coupled receptor signaling pathway);GO:0007189(adenylate cyclase-activating G protein-coupled receptor signaling pathway);GO:0016020(membrane);GO:0016021(integral component o…	NA	K08452	NA
0	ENSDARG00000004301	rhogb	9.84612	7.54708	0.383637	0.951	0.946	3.06965e-109	8.50661e-105	ras homolog family member Gb [Source:ZFIN;Acc:ZDB-GENE-030131-8877]	GO:0000166(nucleotide binding);GO:0003924(GTPase activity);GO:0005525(GTP binding);GO:0005622(intracellular);GO:0005737(cytoplasm);GO:0005886(plasma membrane);GO:0005938(cell cortex);GO:0007015(actin filament organization);GO:0007163(establishment or maintenance of cell polarity);GO:0007264(small GTPase mediated signal transduction);GO:0007266(Rho protein signal transduction);GO:0008360(regulatio…	05132(Salmonella infection)	K07863	NA
0	ENSDARG00000036588	mhc1zba	5.16294	3.92039	0.397195	0.712	0.721	8.0331e-109	2.22613e-104	major histocompatibility complex class I ZBA [Source:ZFIN;Acc:ZDB-GENE-040426-2149]	GO:0016020(membrane);GO:0016021(integral component of membrane)	NA	NA	NA
0	ENSDARG00000002353	tagapa	4.21716	2.83512	0.57286	0.481	0.487	2.07531e-108	5.7511e-104	T cell activation RhoGTPase activating protein a [Source:ZFIN;Acc:ZDB-GENE-040426-1877]	GO:0005096(GTPase activator activity);GO:0007165(signal transduction);GO:0043547(positive regulation of GTPase activity)	NA	NA	NA
0	ENSDARG00000074501	tnip2	3.32239	2.61709	0.344258	0.648	0.617	3.76901e-108	1.04447e-103	TNFAIP3 interacting protein 2 [Source:ZFIN;Acc:ZDB-GENE-120913-2]	GO:0070530(K63-linked polyubiquitin modification-dependent protein binding)	NA	NA	NA
0	ENSDARG00000077499	plekho1b	2.43073	1.95702	0.312736	0.51	0.539	1.11033e-107	3.07695e-103	pleckstrin homology domain containing, family O member 1b [Source:ZFIN;Acc:ZDB-GENE-100609-2]	GO:1901739(regulation of myoblast fusion)	NA	NA	NA
0	ENSDARG00000099555	foxo1a	2.40749	1.61132	0.579287	0.441	0.365	2.4223e-107	6.71269e-103	forkhead box O1 a [Source:ZFIN;Acc:ZDB-GENE-061013-59]	GO:0000122(negative regulation of transcription by RNA polymerase II);GO:0000981(DNA-binding transcription factor activity, RNA polymerase II-specific);GO:0001945(lymph vessel development);GO:0003677(DNA binding);GO:0003700(DNA-binding transcription factor activity);GO:0005634(nucleus);GO:0005737(cytoplasm);GO:0006355(regulation of transcription, DNA-templated);GO:0008134(transcription factor bin…	04068(FoxO signaling pathway);04218(Cellular senescence);04910(Insulin signaling pathway);04933(AGE-RAGE signaling pathway in diabetic complications)	K07201	NA
0	ENSDARG00000008363	mcl1b	2.93261	2.42933	0.271625	0.605	0.608	4.04401e-107	1.12068e-102	MCL1, BCL2 family apoptosis regulator b [Source:ZFIN;Acc:ZDB-GENE-030825-1]	GO:0005741(mitochondrial outer membrane);GO:0007088(regulation of mitotic nuclear division);GO:0008630(intrinsic apoptotic signaling pathway in response to DNA damage);GO:0042803(protein homodimerization activity);GO:0042981(regulation of apoptotic process);GO:0043009(chordate embryonic development);GO:0043066(negative regulation of apoptotic process);GO:0043154(negative regulation of cysteine-ty…	NA	NA	NA
0	ENSDARG00000054389	rhof	0.924796	0.753422	0.295676	0.276	0.269	9.1392e-107	2.53265e-102	ras homolog family member F [Source:ZFIN;Acc:ZDB-GENE-050522-280]	GO:0000166(nucleotide binding);GO:0003924(GTPase activity);GO:0005525(GTP binding);GO:0005622(intracellular);GO:0005737(cytoplasm);GO:0005886(plasma membrane);GO:0005938(cell cortex);GO:0007015(actin filament organization);GO:0007264(small GTPase mediated signal transduction);GO:0007266(Rho protein signal transduction);GO:0008360(regulation of cell shape);GO:0016477(cell migration);GO:0019901(pro…	NA	K07872	NA
0	ENSDARG00000104068	gstp1	4.2166	3.35321	0.33054	0.76	0.724	1.97931e-106	5.48506e-102	glutathione S-transferase pi 1 [Source:ZFIN;Acc:ZDB-GENE-020806-4]	GO:0004364(glutathione transferase activity);GO:0005515(protein binding);GO:0016740(transferase activity);GO:0071466(cellular response to xenobiotic stimulus)	00480(Glutathione metabolism);00980(Metabolism of xenobiotics by cytochrome P450);00982(Drug metabolism - cytochrome P450);00983(Drug metabolism - other enzymes)	NA	NA
0	ENSDARG00000099532	ubl3a	1.87436	1.39524	0.425884	0.415	0.379	2.03873e-106	5.64974e-102	ubiquitin-like 3a [Source:ZFIN;Acc:ZDB-GENE-030131-3431]	GO:0003674(molecular_function);GO:0005515(protein binding);GO:0005886(plasma membrane);GO:0016020(membrane)	NA	NA	NA
0	ENSDARG00000078310	cecr2	0.837596	0.670172	0.321722	0.259	0.224	3.80703e-106	1.055e-101	cat eye syndrome chromosome region, candidate 2 [Source:ZFIN;Acc:ZDB-GENE-131121-533]	GO:0002244(hematopoietic progenitor cell differentiation);GO:0005515(protein binding)	NA	NA	NA
0	ENSDARG00000054755	alox5ap	14.2472	11.1902	0.348441	0.961	0.956	4.44303e-106	1.23125e-101	arachidonate 5-lipoxygenase-activating protein [Source:ZFIN;Acc:ZDB-GENE-030131-9322]	GO:0001525(angiogenesis);GO:0004364(glutathione transferase activity);GO:0004464(leukotriene-C4 synthase activity);GO:0004602(glutathione peroxidase activity);GO:0005635(nuclear envelope);GO:0005783(endoplasmic reticulum);GO:0006691(leukotriene metabolic process);GO:0008047(enzyme activator activity);GO:0016021(integral component of membrane);GO:0019370(leukotriene biosynthetic process);GO:004308…	NA	NA	NA
0	ENSDARG00000058731	slc2a6	4.03574	3.03791	0.409752	0.68	0.665	6.34953e-106	1.75958e-101	solute carrier family 2 (facilitated glucose transporter), member 6 [Source:ZFIN;Acc:ZDB-GENE-081104-301]	GO:0005215(transporter activity);GO:0005351(carbohydrate:proton symporter activity);GO:0005887(integral component of plasma membrane);GO:0016020(membrane);GO:0016021(integral component of membrane);GO:0022857(transmembrane transporter activity);GO:0034219(carbohydrate transmembrane transport);GO:0055056(D-glucose transmembrane transporter activity);GO:0055085(transmembrane transport);GO:1902600(p…	NA	K08144	NA
0	ENSDARG00000013598	tnfb	13.8278	9.11593	0.601112	0.803	0.704	8.8251e-106	2.44561e-101	tumor necrosis factor b (TNF superfamily, member 2) [Source:ZFIN;Acc:ZDB-GENE-050601-2]	GO:0001889(liver development);GO:0005125(cytokine activity);GO:0005164(tumor necrosis factor receptor binding);GO:0005515(protein binding);GO:0005615(extracellular space);GO:0006955(immune response);GO:0010469(regulation of signaling receptor activity);GO:0016020(membrane);GO:0016021(integral component of membrane)	04060(Cytokine-cytokine receptor interaction);05168(Herpes simplex virus 1 infection)	K05468	NA
0	ENSDARG00000114387	CU499336.2	8.18791	6.63959	0.302402	0.918	0.907	1.42123e-105	3.93851e-101	NA	NA	NA	NA	NA
0	ENSDARG00000101034	si:dkey-206d17.12	4.5501	3.65793	0.314869	0.752	0.751	1.68064e-105	4.65739e-101	si:dkey-206d17.12 [Source:ZFIN;Acc:ZDB-GENE-081031-82]	GO:0046872(metal ion binding)	NA	K18668	EC:3.1.-.-
0	ENSDARG00000021647	gnai1	4.58621	3.79069	0.274843	0.794	0.827	3.8708e-105	1.07268e-100	guanine nucleotide binding protein (G protein), alpha inhibiting activity polypeptide 1 [Source:ZFIN;Acc:ZDB-GENE-040426-1310]	GO:0000166(nucleotide binding);GO:0001664(G protein-coupled receptor binding);GO:0003924(GTPase activity);GO:0005525(GTP binding);GO:0005834(heterotrimeric G-protein complex);GO:0007165(signal transduction);GO:0007186(G protein-coupled receptor signaling pathway);GO:0007188(adenylate cyclase-modulating G protein-coupled receptor signaling pathway);GO:0019001(guanyl nucleotide binding);GO:0031683(…	04261(Adrenergic signaling in cardiomyocytes);04371(Apelin signaling pathway);04540(Gap junction);04914(Progesterone-mediated oocyte maturation);04916(Melanogenesis)	K04630	NA
0	ENSDARG00000090352	CR855311.1	3.9589	2.13472	0.891052	0.395	0.282	8.12009e-105	2.25024e-100	uncharacterized LOC101883708 [Source:NCBI gene;Acc:101883708]	NA	NA	NA	NA
0	ENSDARG00000098108	dusp2	3.60518	2.34601	0.619861	0.46	0.44	1.46269e-104	4.0534e-100	dual specificity phosphatase 2 [Source:ZFIN;Acc:ZDB-GENE-040801-188]	GO:0000188(inactivation of MAPK activity);GO:0004721(phosphoprotein phosphatase activity);GO:0004725(protein tyrosine phosphatase activity);GO:0005634(nucleus);GO:0005737(cytoplasm);GO:0006470(protein dephosphorylation);GO:0008138(protein tyrosine/serine/threonine phosphatase activity);GO:0016311(dephosphorylation);GO:0016787(hydrolase activity);GO:0016791(phosphatase activity);GO:0017017(MAP kin…	04010(MAPK signaling pathway)	K04459	3.1.3.48;EC:3.1.3.16
0	ENSDARG00000037891	mlx	3.91953	3.19856	0.293256	0.7	0.716	1.93928e-104	5.37413e-100	MLX, MAX dimerization protein [Source:ZFIN;Acc:ZDB-GENE-050522-316]	GO:0003700(DNA-binding transcription factor activity);GO:0005634(nucleus);GO:0006355(regulation of transcription, DNA-templated);GO:0006357(regulation of transcription by RNA polymerase II);GO:0008134(transcription factor binding);GO:0046983(protein dimerization activity)	NA	K09113	NA
0	ENSDARG00000068233	zgc:64051	6.6467	5.34078	0.315586	0.898	0.894	9.54139e-104	2.64411e-99	zgc:64051 [Source:ZFIN;Acc:ZDB-GENE-040426-1349]	GO:0003674(molecular_function);GO:0005887(integral component of plasma membrane);GO:0007166(cell surface receptor signaling pathway);GO:0016020(membrane);GO:0016021(integral component of membrane)	NA	K06489	NA
0	ENSDARG00000089463	dhx58	0.719742	0.542637	0.407493	0.172	0.143	9.99222e-104	2.76904e-99	DEXH (Asp-Glu-X-His) box polypeptide 58 [Source:ZFIN;Acc:ZDB-GENE-120612-3]	GO:0003677(DNA binding);GO:0004386(helicase activity);GO:0005524(ATP binding);GO:0016787(hydrolase activity)	04622(RIG-I-like receptor signaling pathway)	K12649	EC:3.6.4.13
0	ENSDARG00000094485	si:dkey-27h10.2	7.37415	5.92666	0.315258	0.894	0.863	1.02337e-103	2.83595e-99	si:dkey-27h10.2 [Source:ZFIN;Acc:ZDB-GENE-090313-296]	GO:0016020(membrane);GO:0016021(integral component of membrane)	NA	NA	NA
0	ENSDARG00000098787	cd7al	4.95468	3.89762	0.346198	0.775	0.801	2.62333e-103	7.26978e-99	cd7 antigen-like [Source:ZFIN;Acc:ZDB-GENE-061207-47]	GO:0016020(membrane);GO:0016021(integral component of membrane)	NA	NA	NA
0	ENSDARG00000053010	lpcat2	1.42496	1.12992	0.334691	0.39	0.372	6.88467e-103	1.90788e-98	lysophosphatidylcholine acyltransferase 2 [Source:ZFIN;Acc:ZDB-GENE-050522-229]	GO:0005509(calcium ion binding);GO:0016020(membrane);GO:0016021(integral component of membrane);GO:0016746(transferase activity, transferring acyl groups)	00564(Glycerophospholipid metabolism);00565(Ether lipid metabolism)	K13510	2.3.1.67;EC:2.3.1.23
0	ENSDARG00000104474	il6r	7.96115	5.97612	0.413768	0.847	0.85	2.27477e-102	6.30384e-98	interleukin 6 receptor [Source:ZFIN;Acc:ZDB-GENE-080107-7]	GO:0004896(cytokine receptor activity);GO:0005515(protein binding);GO:0009897(external side of plasma membrane);GO:0016020(membrane);GO:0016021(integral component of membrane);GO:0019221(cytokine-mediated signaling pathway);GO:0019955(cytokine binding);GO:0043235(receptor complex)	04060(Cytokine-cytokine receptor interaction)	K05055	NA
0	ENSDARG00000019307	dusp5	2.37285	1.71942	0.4647	0.512	0.439	7.98336e-102	2.21235e-97	dual specificity phosphatase 5 [Source:ZFIN;Acc:ZDB-GENE-010625-1]	GO:0000188(inactivation of MAPK activity);GO:0004721(phosphoprotein phosphatase activity);GO:0004725(protein tyrosine phosphatase activity);GO:0005634(nucleus);GO:0005737(cytoplasm);GO:0006470(protein dephosphorylation);GO:0008138(protein tyrosine/serine/threonine phosphatase activity);GO:0016311(dephosphorylation);GO:0016787(hydrolase activity);GO:0016791(phosphatase activity);GO:0017017(MAP kin…	04010(MAPK signaling pathway)	K04459	3.1.3.48;EC:3.1.3.16
0	ENSDARG00000112943	adgre5b.3.1	1.64967	1.27784	0.368474	0.437	0.362	3.00789e-101	8.33546e-97	adhesion G protein-coupled receptor E5b, duplicate 3 [Source:ZFIN;Acc:ZDB-GENE-121214-275]	GO:0004888(transmembrane signaling receptor activity);GO:0004930(G protein-coupled receptor activity);GO:0005509(calcium ion binding);GO:0005887(integral component of plasma membrane);GO:0007166(cell surface receptor signaling pathway);GO:0007186(G protein-coupled receptor signaling pathway);GO:0007189(adenylate cyclase-activating G protein-coupled receptor signaling pathway);GO:0016020(membrane)…	NA	K08446	NA
0	ENSDARG00000035719	arl5c	3.25087	2.25348	0.528676	0.545	0.483	3.20341e-101	8.87729e-97	ADP-ribosylation factor-like 5C [Source:ZFIN;Acc:ZDB-GENE-040426-1866]	GO:0000166(nucleotide binding);GO:0005525(GTP binding);GO:0005737(cytoplasm);GO:0005802(trans-Golgi network);GO:0006886(intracellular protein transport);GO:0016192(vesicle-mediated transport);GO:1903292(protein localization to Golgi membrane)	NA	NA	NA
0	ENSDARG00000087832	bcl3	0.812629	0.615953	0.399776	0.24	0.17	8.03455e-101	2.22653e-96	BCL3, transcription coactivator [Source:ZFIN;Acc:ZDB-GENE-061013-1]	GO:0005515(protein binding);GO:0048545(response to steroid hormone)	04625(C-type lectin receptor signaling pathway)	K09258	NA
0	ENSDARG00000016527	helz2	1.20726	0.870686	0.471514	0.258	0.23	1.98289e-100	5.49499e-96	helicase with zinc finger 2, transcriptional coactivator [Source:ZFIN;Acc:ZDB-GENE-120920-1]	GO:0003723(RNA binding);GO:0004540(ribonuclease activity);GO:0030374(nuclear receptor transcription coactivator activity);GO:0090501(RNA phosphodiester bond hydrolysis);GO:1903508(positive regulation of nucleic acid-templated transcription)	NA	NA	NA
0	ENSDARG00000111698	tnfsf18	1.77313	1.25469	0.49897	0.382	0.305	1.34097e-99	3.7161e-95	TNF superfamily member 18 [Source:ZFIN;Acc:ZDB-GENE-101109-1]	GO:0005164(tumor necrosis factor receptor binding);GO:0005515(protein binding);GO:0006955(immune response);GO:0016020(membrane);GO:0016021(integral component of membrane);GO:0042531(positive regulation of tyrosine phosphorylation of STAT protein);GO:0055113(epiboly involved in gastrulation with mouth forming second)	NA	NA	NA
0	ENSDARG00000076914	lacc1	1.93174	1.12606	0.778614	0.267	0.188	3.35499e-99	9.29735e-95	laccase (multicopper oxidoreductase) domain containing 1 [Source:ZFIN;Acc:ZDB-GENE-081104-155]	GO:0005507(copper ion binding)	NA	K05810	EC:1.10.3.-
0	ENSDARG00000054578	arl6ip1	5.14998	4.17317	0.303422	0.844	0.847	3.49342e-99	9.68097e-95	ADP-ribosylation factor-like 6 interacting protein 1 [Source:ZFIN;Acc:ZDB-GENE-040426-1087]	GO:0001755(neural crest cell migration);GO:0005515(protein binding);GO:0005784(Sec61 translocon complex);GO:0006613(cotranslational protein targeting to membrane);GO:0014032(neural crest cell development);GO:0016020(membrane);GO:0016021(integral component of membrane);GO:0060042(retina morphogenesis in camera-type eye)	NA	NA	NA
0	ENSDARG00000036420	si:dkey-33c9.6	0.924214	0.72282	0.35459	0.287	0.226	6.70729e-99	1.85872e-94	si:dkey-33c9.6 [Source:ZFIN;Acc:ZDB-GENE-130530-592]	GO:0005089(Rho guanyl-nucleotide exchange factor activity);GO:0005096(GTPase activator activity);GO:0007165(signal transduction);GO:0035023(regulation of Rho protein signal transduction);GO:0043547(positive regulation of GTPase activity)	NA	NA	NA
0	ENSDARG00000092870	BX936337.1	2.05915	1.71732	0.261896	0.485	0.513	8.78414e-99	2.43426e-94	NA	NA	NA	NA	NA
0	ENSDARG00000074340	serf2	5.03539	4.17338	0.270887	0.836	0.855	9.53993e-99	2.64371e-94	small EDRK-rich factor 2 [Source:ZFIN;Acc:ZDB-GENE-041108-1]	NA	NA	NA	NA
0	ENSDARG00000090548	CR753886.1	1.39024	1.12792	0.301662	0.343	0.346	3.05761e-98	8.47324e-94	GTPase IMAP family member 4 [Source:NCBI gene;Acc:793765]	GO:0005525(GTP binding)	NA	NA	NA
0	ENSDARG00000030440	rsrp1	2.43141	1.93325	0.330765	0.542	0.533	7.48119e-98	2.07319e-93	arginine/serine-rich protein 1 [Source:ZFIN;Acc:ZDB-GENE-060616-210]	NA	NA	NA	NA
0	ENSDARG00000097901	si:ch73-90p23.1	1.86983	1.39661	0.42098	0.462	0.332	1.57303e-97	4.35917e-93	si:ch73-90p23.1 [Source:ZFIN;Acc:ZDB-GENE-131121-421]	GO:0004930(G protein-coupled receptor activity);GO:0007186(G protein-coupled receptor signaling pathway);GO:0016020(membrane);GO:0016021(integral component of membrane)	NA	K04328	NA
0	ENSDARG00000023303	zgc:66427	6.12158	4.88677	0.325022	0.857	0.87	7.03968e-97	1.95084e-92	zgc:66427 [Source:ZFIN;Acc:ZDB-GENE-040426-1913]	NA	NA	K10694	EC:2.3.2.27
0	ENSDARG00000094097	CR936321.1	4.16417	3.30512	0.333327	0.754	0.75	1.24631e-96	3.45377e-92	si:ch211-209a2.1 [Source:NCBI gene;Acc:100536508]	NA	NA	NA	NA
0	ENSDARG00000055365	si:dkey-25e12.3	5.18804	4.23449	0.293001	0.775	0.778	4.99646e-96	1.38462e-91	si:dkey-25e12.3 [Source:ZFIN;Acc:ZDB-GENE-041001-132]	GO:0000166(nucleotide binding);GO:0003824(catalytic activity);GO:0005634(nucleus);GO:0005737(cytoplasm);GO:0016787(hydrolase activity)	NA	NA	NA
0	ENSDARG00000044755	si:dkeyp-87d8.8	0.747502	0.613941	0.283978	0.231	0.208	5.28756e-96	1.46529e-91	si:dkeyp-87d8.8 [Source:ZFIN;Acc:ZDB-GENE-041111-161]	GO:0008150(biological_process);GO:0008375(acetylglucosaminyltransferase activity);GO:0016020(membrane);GO:0016021(integral component of membrane)	NA	NA	NA
0	ENSDARG00000056783	raraa	7.03139	4.91891	0.51547	0.762	0.681	8.50179e-96	2.35602e-91	retinoic acid receptor, alpha a [Source:ZFIN;Acc:ZDB-GENE-980526-284]	GO:0000122(negative regulation of transcription by RNA polymerase II);GO:0000976(transcription regulatory region sequence-specific DNA binding);GO:0000977(RNA polymerase II regulatory region sequence-specific DNA binding);GO:0000981(DNA-binding transcription factor activity, RNA polymerase II-specific);GO:0001889(liver development);GO:0003677(DNA binding);GO:0003700(DNA-binding transcription fact…	NA	K08527	NA
0	ENSDARG00000041394	dnajb1b	1.09294	0.794073	0.460877	0.258	0.21	4.88008e-93	1.35237e-88	DnaJ heat shock protein family (Hsp40) member B1b [Source:ZFIN;Acc:ZDB-GENE-030131-5455]	GO:0000122(negative regulation of transcription by RNA polymerase II);GO:0002088(lens development in camera-type eye);GO:0005575(cellular_component);GO:0005829(cytosol);GO:0006457(protein folding);GO:0051082(unfolded protein binding);GO:0051085(chaperone cofactor-dependent protein refolding);GO:0051087(chaperone binding)	04141(Protein processing in endoplasmic reticulum)	K09507	NA
0	ENSDARG00000015887	b2ml	15.1535	11.7402	0.368192	0.988	0.98	6.38412e-93	1.76917e-88	beta-2-microglobulin, like [Source:ZFIN;Acc:ZDB-GENE-040426-2136]	GO:0002376(immune system process);GO:0002474(antigen processing and presentation of peptide antigen via MHC class I);GO:0005576(extracellular region);GO:0006955(immune response);GO:0042612(MHC class I protein complex)	05168(Herpes simplex virus 1 infection)	K08055	NA
0	ENSDARG00000099411	zgc:158343	24.6378	18.32	0.427452	0.899	0.849	7.06242e-93	1.95714e-88	zgc:158343 [Source:ZFIN;Acc:ZDB-GENE-061201-9]	GO:0003674(molecular_function);GO:0043066(negative regulation of apoptotic process)	NA	NA	NA
0	ENSDARG00000069453	zgc:113314	0.677432	0.552407	0.294344	0.145	0.167	7.08646e-93	1.9638e-88	zgc:113314 [Source:ZFIN;Acc:ZDB-GENE-050913-19]	GO:0003674(molecular_function);GO:0005575(cellular_component);GO:0008150(biological_process)	NA	NA	NA
0	ENSDARG00000016623	si:ch211-195b13.1	2.75819	1.95732	0.494844	0.485	0.418	1.48412e-92	4.11279e-88	si:ch211-195b13.1 [Source:ZFIN;Acc:ZDB-GENE-030131-7626]	GO:0000166(nucleotide binding);GO:0004672(protein kinase activity);GO:0004674(protein serine/threonine kinase activity);GO:0005524(ATP binding);GO:0006468(protein phosphorylation);GO:0015459(potassium channel regulator activity);GO:0016301(kinase activity);GO:0016310(phosphorylation);GO:0016740(transferase activity);GO:0018105(peptidyl-serine phosphorylation);GO:0035091(phosphatidylinositol bindi…	NA	NA	NA
0	ENSDARG00000076134	zgc:162972	1.25261	0.999721	0.325336	0.332	0.312	3.04535e-92	8.43927e-88	zgc:162972 [Source:ZFIN;Acc:ZDB-GENE-070424-49]	GO:0003676(nucleic acid binding);GO:0005634(nucleus)	NA	NA	NA
0	ENSDARG00000015551	fth1a	52.0332	39.7441	0.388691	0.974	0.982	5.80657e-92	1.60912e-87	ferritin, heavy polypeptide 1a [Source:ZFIN;Acc:ZDB-GENE-000831-2]	GO:0004322(ferroxidase activity);GO:0005506(iron ion binding);GO:0005737(cytoplasm);GO:0006826(iron ion transport);GO:0006879(cellular iron ion homeostasis);GO:0006880(intracellular sequestering of iron ion);GO:0008198(ferrous iron binding);GO:0008199(ferric iron binding);GO:0042802(identical protein binding);GO:0046872(metal ion binding);GO:0055114(oxidation-reduction process)	04216(Ferroptosis);04217(Necroptosis)	K00522	EC:1.16.3.2
0	ENSDARG00000013144	atp1b1a	6.24786	5.09311	0.294816	0.854	0.873	9.52343e-92	2.63913e-87	ATPase Na+/K+ transporting subunit beta 1a [Source:ZFIN;Acc:ZDB-GENE-001127-3]	GO:0001671(ATPase activator activity);GO:0005391(sodium:potassium-exchanging ATPase activity);GO:0005890(sodium:potassium-exchanging ATPase complex);GO:0006811(ion transport);GO:0006813(potassium ion transport);GO:0006814(sodium ion transport);GO:0006883(cellular sodium ion homeostasis);GO:0010248(establishment or maintenance of transmembrane electrochemical gradient);GO:0016020(membrane);GO:0016…	04260(Cardiac muscle contraction);04261(Adrenergic signaling in cardiomyocytes)	K01540	NA
0	ENSDARG00000078249	unc13d	4.38206	3.64745	0.26472	0.719	0.757	4.34847e-89	1.20505e-84	unc-13 homolog D (C. elegans) [Source:ZFIN;Acc:ZDB-GENE-110411-188]	NA	NA	K19728	NA
0	ENSDARG00000079553	cd83	0.717733	0.576809	0.315354	0.142	0.165	2.35474e-88	6.52546e-84	CD83 molecule [Source:ZFIN;Acc:ZDB-GENE-060503-762]	GO:0002286(T cell activation involved in immune response);GO:0002468(dendritic cell antigen processing and presentation);GO:0009986(cell surface);GO:0016020(membrane);GO:0016021(integral component of membrane);GO:0071753(IgM immunoglobulin complex)	NA	K06510	NA
0	ENSDARG00000063195	pxk	6.61749	5.28062	0.325577	0.844	0.858	5.9574e-88	1.65092e-83	PX domain containing serine/threonine kinase [Source:ZFIN;Acc:ZDB-GENE-050208-393]	GO:0003779(actin binding);GO:0004672(protein kinase activity);GO:0005524(ATP binding);GO:0005737(cytoplasm);GO:0005886(plasma membrane);GO:0006468(protein phosphorylation);GO:0032780(negative regulation of ATPase activity);GO:0035091(phosphatidylinositol binding);GO:0042391(regulation of membrane potential);GO:0043271(negative regulation of ion transport)	NA	K17543	NA
0	ENSDARG00000052088	cxcr1	4.23658	3.23556	0.388883	0.546	0.4	1.19071e-87	3.2997e-83	chemokine (C-X-C motif) receptor 1 [Source:ZFIN;Acc:ZDB-GENE-070302-4]	GO:0004930(G protein-coupled receptor activity);GO:0006935(chemotaxis);GO:0006955(immune response);GO:0007165(signal transduction);GO:0007186(G protein-coupled receptor signaling pathway);GO:0007204(positive regulation of cytosolic calcium ion concentration);GO:0009897(external side of plasma membrane);GO:0016020(membrane);GO:0016021(integral component of membrane);GO:0016493(C-C chemokine recept…	NA	NA	NA
0	ENSDARG00000097470	FP015862.2	1.22989	0.939622	0.388383	0.305	0.27	3.44445e-87	9.54525e-83	NA	NA	NA	NA	NA
0	ENSDARG00000113899	zgc:77650	7.89457	6.47244	0.286551	0.885	0.895	4.75948e-87	1.31895e-82	zgc:77650 [Source:ZFIN;Acc:ZDB-GENE-030131-6151]	GO:0000166(nucleotide binding);GO:0005525(GTP binding);GO:0005737(cytoplasm);GO:0005794(Golgi apparatus);GO:0005886(plasma membrane);GO:0006886(intracellular protein transport);GO:0006890(retrograde vesicle-mediated transport, Golgi to endoplasmic reticulum);GO:0006893(Golgi to plasma membrane transport);GO:0016192(vesicle-mediated transport)	NA	K07939	NA
0	ENSDARG00000075718	rpz5	1.50033	1.18272	0.343163	0.369	0.345	1.41123e-86	3.9108e-82	rapunzel 5 [Source:ZFIN;Acc:ZDB-GENE-030131-4678]	NA	NA	NA	NA
0	ENSDARG00000044039	stx11a	4.79382	3.87633	0.306486	0.739	0.727	2.67541e-86	7.41411e-82	syntaxin 11a [Source:ZFIN;Acc:ZDB-GENE-040426-2564]	GO:0000149(SNARE binding);GO:0005484(SNAP receptor activity);GO:0005794(Golgi apparatus);GO:0005886(plasma membrane);GO:0006886(intracellular protein transport);GO:0006887(exocytosis);GO:0006906(vesicle fusion);GO:0008021(synaptic vesicle);GO:0012505(endomembrane system);GO:0016020(membrane);GO:0016021(integral component of membrane);GO:0016192(vesicle-mediated transport);GO:0031201(SNARE complex…	04130(SNARE interactions in vesicular transport)	K08487	NA
0	ENSDARG00000094295	CR855337.1	1.91621	1.39028	0.462881	0.348	0.336	1.04869e-85	2.90614e-81	KIAA0040 ortholog [Source:NCBI gene;Acc:100536987]	NA	NA	NA	NA
0	ENSDARG00000017602	ccng2	15.1571	11.962	0.341528	0.967	0.954	2.91653e-85	8.08228e-81	cyclin G2 [Source:ZFIN;Acc:ZDB-GENE-021016-1]	GO:0000079(regulation of cyclin-dependent protein serine/threonine kinase activity);GO:0000278(mitotic cell cycle);GO:0000307(cyclin-dependent protein kinase holoenzyme complex);GO:0004672(protein kinase activity);GO:0005634(nucleus);GO:0005737(cytoplasm);GO:0006468(protein phosphorylation);GO:0007088(regulation of mitotic nuclear division);GO:0008284(positive regulation of cell population prolif…	04068(FoxO signaling pathway);04115(p53 signaling pathway)	K10146	NA
0	ENSDARG00000042332	plin2	1.48006	1.13841	0.378629	0.348	0.315	7.44907e-85	2.06429e-80	perilipin 2 [Source:ZFIN;Acc:ZDB-GENE-050913-12]	GO:0003674(molecular_function);GO:0005575(cellular_component);GO:0008150(biological_process)	03320(PPAR signaling pathway)	K17284	NA
0	ENSDARG00000102435	plekhf1	6.79268	4.18131	0.700024	0.644	0.547	3.92826e-84	1.0886e-79	pleckstrin homology domain containing, family F (with FYVE domain) member 1 [Source:ZFIN;Acc:ZDB-GENE-040426-1289]	GO:0035091(phosphatidylinositol binding);GO:0046872(metal ion binding)	NA	NA	NA
0	ENSDARG00000030598	nampta	0.732909	0.59327	0.304945	0.238	0.188	4.55983e-83	1.26362e-78	nicotinamide phosphoribosyltransferase a [Source:ZFIN;Acc:ZDB-GENE-110420-1]	GO:0003824(catalytic activity);GO:0004514(nicotinate-nucleotide diphosphorylase (carboxylating) activity);GO:0005125(cytokine activity);GO:0005576(extracellular region);GO:0005615(extracellular space);GO:0005634(nucleus);GO:0005737(cytoplasm);GO:0009435(NAD biosynthetic process);GO:0010469(regulation of signaling receptor activity);GO:0016740(transferase activity);GO:0016757(transferase activity,…	00760(Nicotinate and nicotinamide metabolism);04621(NOD-like receptor signaling pathway)	K03462	EC:2.4.2.12
0	ENSDARG00000013711	zgc:77486.1	0.98194	0.760145	0.36936	0.249	0.214	2.76522e-82	7.66298e-78	zgc:77486 [Source:ZFIN;Acc:ZDB-GENE-040426-2056]	GO:0005575(cellular_component);GO:0008150(biological_process)	NA	K20287	NA
0	ENSDARG00000091996	tcnbb	5.21352	2.84341	0.874635	0.336	0.185	7.11006e-81	1.97034e-76	transcobalamin beta b [Source:ZFIN;Acc:ZDB-GENE-030131-12]	GO:0071466(cellular response to xenobiotic stimulus)	NA	NA	NA
0	ENSDARG00000103551	rnf213b	1.04534	0.853276	0.292892	0.254	0.265	3.31797e-78	9.19475e-74	ring finger protein 213b [Source:ZFIN;Acc:ZDB-GENE-110822-1]	GO:0004842(ubiquitin-protein transferase activity);GO:0016567(protein ubiquitination);GO:0016887(ATPase activity)	NA	K22754	EC:2.3.2.27
0	ENSDARG00000056499	ca6	1.83495	1.36978	0.421796	0.441	0.323	3.61502e-78	1.00179e-73	carbonic anhydrase VI [Source:ZFIN;Acc:ZDB-GENE-030131-7091]	GO:0004089(carbonate dehydratase activity);GO:0006730(one-carbon metabolic process);GO:0008270(zinc ion binding);GO:0009986(cell surface);GO:0036269(swimming behavior);GO:0046872(metal ion binding)	00910(Nitrogen metabolism)	K01672	EC:4.2.1.1
0	ENSDARG00000001452	adam8a	13.7377	11.1099	0.306294	0.934	0.943	3.95351e-78	1.0956e-73	ADAM metallopeptidase domain 8a [Source:ZFIN;Acc:ZDB-GENE-030616-622]	GO:0002020(protease binding);GO:0004222(metalloendopeptidase activity);GO:0006508(proteolysis);GO:0007229(integrin-mediated signaling pathway);GO:0008237(metallopeptidase activity);GO:0016020(membrane);GO:0016021(integral component of membrane)	NA	K06540	EC:3.4.24.-
0	ENSDARG00000039034	marcksl1a	5.27649	3.81215	0.468972	0.638	0.567	2.59754e-77	7.19829e-73	MARCKS-like 1a [Source:ZFIN;Acc:ZDB-GENE-040426-2146]	GO:0003407(neural retina development);GO:0005516(calmodulin binding);GO:0005737(cytoplasm);GO:0005856(cytoskeleton);GO:0005886(plasma membrane);GO:0007417(central nervous system development);GO:0016020(membrane);GO:0051216(cartilage development)	NA	NA	NA
0	ENSDARG00000036107	txnipa	2.06271	1.60494	0.362028	0.41	0.41	4.91864e-76	1.36305e-71	thioredoxin interacting protein a [Source:ZFIN;Acc:ZDB-GENE-030804-10]	NA	04621(NOD-like receptor signaling pathway)	K20910	NA
0	ENSDARG00000099420	nme2b.2	0.871217	0.690002	0.336432	0.251	0.202	1.158e-73	3.20905e-69	NME/NM23 nucleoside diphosphate kinase 2b, tandem duplicate 2 [Source:ZFIN;Acc:ZDB-GENE-000210-33]	GO:0000166(nucleotide binding);GO:0004550(nucleoside diphosphate kinase activity);GO:0005524(ATP binding);GO:0006165(nucleoside diphosphate phosphorylation);GO:0006183(GTP biosynthetic process);GO:0006228(UTP biosynthetic process);GO:0006241(CTP biosynthetic process);GO:0016301(kinase activity);GO:0016310(phosphorylation);GO:0016740(transferase activity)	00230(Purine metabolism);00240(Pyrimidine metabolism);00983(Drug metabolism - other enzymes)	K00940	EC:2.7.4.6
0	ENSDARG00000061459	si:dkey-253i9.4	0.881058	0.727816	0.275662	0.215	0.21	1.30053e-72	3.60403e-68	si:dkey-253i9.4 [Source:ZFIN;Acc:ZDB-GENE-090313-280]	GO:0005085(guanyl-nucleotide exchange factor activity);GO:0005096(GTPase activator activity);GO:0005515(protein binding);GO:0005622(intracellular);GO:0007165(signal transduction);GO:0007264(small GTPase mediated signal transduction);GO:0017034(Rap guanyl-nucleotide exchange factor activity);GO:0042127(regulation of cell population proliferation);GO:0043547(positive regulation of GTPase activity)	04010(MAPK signaling pathway);04530(Tight junction)	K08018	NA
0	ENSDARG00000062929	FAM83G	0.720729	0.587659	0.294478	0.227	0.174	2.64065e-72	7.31777e-68	si:dkeyp-9d4.4 [Source:ZFIN;Acc:ZDB-GENE-121214-254]	NA	NA	NA	NA
0	ENSDARG00000034187	calm1b	4.77441	3.87807	0.299984	0.806	0.776	2.27686e-71	6.30965e-67	calmodulin 1b [Source:ZFIN;Acc:ZDB-GENE-030804-2]	GO:0005509(calcium ion binding);GO:0019722(calcium-mediated signaling);GO:0046872(metal ion binding)	04020(Calcium signaling pathway);04070(Phosphatidylinositol signaling system);04114(Oocyte meiosis);04218(Cellular senescence);04261(Adrenergic signaling in cardiomyocytes);04270(Vascular smooth muscle contraction);04371(Apelin signaling pathway);04625(C-type lectin receptor signaling pathway);04744(Phototransduction);04910(Insulin signaling pathway);04912(GnRH signaling pathway);04916(Melanogene…	K02183	NA
0	ENSDARG00000093248	si:dkey-238m4.4	1.77802	1.26502	0.491116	0.39	0.288	2.13846e-70	5.92611e-66	si:dkey-238m4.4 [Source:ZFIN;Acc:ZDB-GENE-100922-215]	GO:0016020(membrane);GO:0016021(integral component of membrane)	NA	NA	NA
0	ENSDARG00000042577	batf3	0.742331	0.571673	0.376871	0.196	0.133	1.51717e-69	4.20439e-65	basic leucine zipper transcription factor, ATF-like 3 [Source:ZFIN;Acc:ZDB-GENE-041014-356]	GO:0000978(RNA polymerase II proximal promoter sequence-specific DNA binding);GO:0003677(DNA binding);GO:0003700(DNA-binding transcription factor activity);GO:0005634(nucleus);GO:0006355(regulation of transcription, DNA-templated);GO:0006357(regulation of transcription by RNA polymerase II)	NA	K09034	NA
0	ENSDARG00000043624	pqlc2	1.84607	1.51688	0.283354	0.431	0.397	1.20002e-67	3.32548e-63	PQ loop repeat containing 2 [Source:ZFIN;Acc:ZDB-GENE-050306-4]	GO:0005765(lysosomal membrane);GO:0008150(biological_process);GO:0015174(basic amino acid transmembrane transporter activity);GO:0015181(arginine transmembrane transporter activity);GO:0015189(L-lysine transmembrane transporter activity);GO:0016020(membrane);GO:0016021(integral component of membrane);GO:1903401(L-lysine transmembrane transport);GO:1903826(arginine transmembrane transport);GO:1990…	NA	NA	NA
0	ENSDARG00000086826	sult6b1	0.732556	0.597063	0.295057	0.174	0.172	6.37485e-67	1.7666e-62	sulfotransferase family, cytosolic, 6b, member 1 [Source:ZFIN;Acc:ZDB-GENE-050417-228]	GO:0005575(cellular_component);GO:0008146(sulfotransferase activity);GO:0016740(transferase activity);GO:0071466(cellular response to xenobiotic stimulus)	NA	K22523	EC:2.8.2.-
0	ENSDARG00000069433	tnk1	0.831967	0.576107	0.530189	0.17	0.085	7.15709e-67	1.98337e-62	tyrosine kinase, non-receptor, 1 [Source:ZFIN;Acc:ZDB-GENE-030131-7427]	GO:0000166(nucleotide binding);GO:0004672(protein kinase activity);GO:0004713(protein tyrosine kinase activity);GO:0004715(non-membrane spanning protein tyrosine kinase activity);GO:0005515(protein binding);GO:0005524(ATP binding);GO:0006468(protein phosphorylation);GO:0016301(kinase activity);GO:0016310(phosphorylation);GO:0016740(transferase activity);GO:0030154(cell differentiation);GO:0038083…	NA	K08252	EC:2.7.10.1
0	ENSDARG00000053136	b2m	22.3999	17.9932	0.316042	0.99	0.985	1.91547e-63	5.30815e-59	beta-2-microglobulin [Source:ZFIN;Acc:ZDB-GENE-980526-88]	GO:0002376(immune system process);GO:0002474(antigen processing and presentation of peptide antigen via MHC class I);GO:0002755(MyD88-dependent toll-like receptor signaling pathway);GO:0004672(protein kinase activity);GO:0005515(protein binding);GO:0005524(ATP binding);GO:0005576(extracellular region);GO:0006468(protein phosphorylation);GO:0006955(immune response);GO:0007165(signal transduction);…	05168(Herpes simplex virus 1 infection)	K08055	NA
0	ENSDARG00000018534	slc6a9	0.983181	0.77282	0.347324	0.224	0.204	5.11353e-63	1.41706e-58	solute carrier family 6 (neurotransmitter transporter, glycine), member 9 [Source:ZFIN;Acc:ZDB-GENE-050105-3]	GO:0003333(amino acid transmembrane transport);GO:0005283(amino acid:sodium symporter activity);GO:0005328(neurotransmitter:sodium symporter activity);GO:0005886(plasma membrane);GO:0005887(integral component of plasma membrane);GO:0006836(neurotransmitter transport);GO:0007626(locomotory behavior);GO:0015187(glycine transmembrane transporter activity);GO:0015293(symporter activity);GO:0015816(gl…	NA	K05038	NA
0	ENSDARG00000039269	arg2	8.95606	7.39682	0.27596	0.784	0.815	6.04758e-58	1.67591e-53	arginase 2 [Source:ZFIN;Acc:ZDB-GENE-030131-1334]	GO:0000050(urea cycle);GO:0004053(arginase activity);GO:0005737(cytoplasm);GO:0006525(arginine metabolic process);GO:0016787(hydrolase activity);GO:0016813(hydrolase activity, acting on carbon-nitrogen (but not peptide) bonds, in linear amidines);GO:0019547(arginine catabolic process to ornithine);GO:0030145(manganese ion binding);GO:0046872(metal ion binding)	00220(Arginine biosynthesis);00330(Arginine and proline metabolism)	K01476	EC:3.5.3.1
0	ENSDARG00000086881	ier2b	1.75005	1.44064	0.280686	0.344	0.331	7.88343e-57	2.18466e-52	immediate early response 2b [Source:ZFIN;Acc:ZDB-GENE-030131-8244]	NA	NA	NA	NA
0	ENSDARG00000069769	gig2j	1.55081	1.0903	0.508299	0.248	0.151	8.51446e-57	2.35953e-52	grass carp reovirus (GCRV)-induced gene 2j [Source:ZFIN;Acc:ZDB-GENE-081022-181]	GO:0003950(NAD+ ADP-ribosyltransferase activity);GO:0005575(cellular_component);GO:0005737(cytoplasm)	NA	NA	NA
0	ENSDARG00000015355	fosl1a	1.29057	0.999261	0.36907	0.291	0.232	8.25694e-55	2.28816e-50	FOS-like antigen 1a [Source:ZFIN;Acc:ZDB-GENE-061207-7]	GO:0000978(RNA polymerase II proximal promoter sequence-specific DNA binding);GO:0003677(DNA binding);GO:0003700(DNA-binding transcription factor activity);GO:0005634(nucleus);GO:0006355(regulation of transcription, DNA-templated);GO:0006357(regulation of transcription by RNA polymerase II)	04310(Wnt signaling pathway)	K04502	NA
0	ENSDARG00000075963	mhc1uba	6.79494	5.22986	0.377687	0.617	0.574	3.61945e-52	1.00302e-47	major histocompatibility complex class I UBA [Source:ZFIN;Acc:ZDB-GENE-990415-145]	GO:0005615(extracellular space);GO:0005886(plasma membrane);GO:0006955(immune response);GO:0009897(external side of plasma membrane);GO:0016020(membrane);GO:0016021(integral component of membrane)	NA	NA	NA
0	ENSDARG00000007769	sult5a1	3.09505	2.06268	0.585447	0.357	0.293	1.15195e-51	3.19227e-47	sulfotransferase family 5A, member 1 [Source:ZFIN;Acc:ZDB-GENE-060929-978]	GO:0005575(cellular_component);GO:0008146(sulfotransferase activity);GO:0016740(transferase activity)	NA	NA	NA
0	ENSDARG00000055064	prdx5	9.96333	8.15241	0.289401	0.926	0.907	2.35925e-50	6.53797e-46	peroxiredoxin 5 [Source:ZFIN;Acc:ZDB-GENE-050522-159]	GO:0005737(cytoplasm);GO:0005739(mitochondrion);GO:0005777(peroxisome);GO:0008379(thioredoxin peroxidase activity);GO:0016491(oxidoreductase activity);GO:0031101(fin regeneration);GO:0034599(cellular response to oxidative stress);GO:0042744(hydrogen peroxide catabolic process);GO:0045454(cell redox homeostasis);GO:0055114(oxidation-reduction process);GO:0098869(cellular oxidant detoxification)	04146(Peroxisome)	K11187	EC:1.11.1.15
0	ENSDARG00000076858	TCIM (1 of many)	1.91615	1.369	0.48509	0.25	0.254	1.33367e-49	3.69587e-45	transcriptional and immune response regulator b [Source:NCBI gene;Acc:558746]	GO:0002264(endothelial cell activation involved in immune response);GO:0005112(Notch binding);GO:0005634(nucleus);GO:0005829(cytosol);GO:0045746(negative regulation of Notch signaling pathway)	NA	NA	NA
0	ENSDARG00000053005	cd22	1.41272	1.14365	0.304827	0.29	0.276	9.11478e-49	2.52589e-44	cd22 molecule [Source:ZFIN;Acc:ZDB-GENE-050522-521]	GO:0003674(molecular_function);GO:0016020(membrane);GO:0016021(integral component of membrane)	NA	NA	NA
0	ENSDARG00000026500	xkr9	0.714007	0.56464	0.338606	0.181	0.12	6.62363e-47	1.83554e-42	XK, Kell blood group complex subunit-related family, member 9 [Source:ZFIN;Acc:ZDB-GENE-060421-6224]	GO:0003674(molecular_function);GO:0005886(plasma membrane);GO:0008150(biological_process);GO:0016020(membrane);GO:0016021(integral component of membrane);GO:0043652(engulfment of apoptotic cell);GO:0070782(phosphatidylserine exposure on apoptotic cell surface);GO:1902742(apoptotic process involved in development)	NA	NA	NA
0	ENSDARG00000026726	anxa1a	1.93502	1.45025	0.416043	0.352	0.279	8.78074e-47	2.43332e-42	annexin A1a [Source:ZFIN;Acc:ZDB-GENE-030131-6664]	GO:0002548(monocyte chemotaxis);GO:0002685(regulation of leukocyte migration);GO:0003697(single-stranded DNA binding);GO:0003727(single-stranded RNA binding);GO:0004859(phospholipase inhibitor activity);GO:0005198(structural molecule activity);GO:0005509(calcium ion binding);GO:0005544(calcium-dependent phospholipid binding);GO:0005615(extracellular space);GO:0005886(plasma membrane);GO:0006909(p…	NA	K17091	NA
0	ENSDARG00000100461	CABZ01078737.1	1.63956	1.08701	0.592944	0.22	0.151	1.41735e-45	3.92777e-41	interleukin-1 receptor type 2 [Source:NCBI gene;Acc:101882195]	GO:0016020(membrane);GO:0016021(integral component of membrane)	NA	NA	NA
0	ENSDARG00000059410	ccr12b.1	0.643023	0.508051	0.339897	0.156	0.089	4.3704e-45	1.21113e-40	chemokine (C-C motif) receptor 12b, tandem duplicate 1 [Source:ZFIN;Acc:ZDB-GENE-090420-5]	GO:0004930(G protein-coupled receptor activity);GO:0004950(chemokine receptor activity);GO:0006935(chemotaxis);GO:0006955(immune response);GO:0007165(signal transduction);GO:0007186(G protein-coupled receptor signaling pathway);GO:0007204(positive regulation of cytosolic calcium ion concentration);GO:0009897(external side of plasma membrane);GO:0016020(membrane);GO:0016021(integral component of m…	NA	NA	NA
0	ENSDARG00000104399	tppp	8.44973	5.47136	0.627006	0.28	0.302	1.0955e-43	3.03586e-39	tubulin polymerization promoting protein [Source:ZFIN;Acc:ZDB-GENE-101115-2]	NA	NA	NA	NA
0	ENSDARG00000089706	si:ch211-276a23.5	2.26538	1.88807	0.262841	0.449	0.395	8.67103e-40	2.40292e-35	si:ch211-276a23.5 [Source:ZFIN;Acc:ZDB-GENE-141215-4]	GO:0004177(aminopeptidase activity);GO:0005737(cytoplasm);GO:0005886(plasma membrane);GO:0006508(proteolysis);GO:0008233(peptidase activity);GO:0008237(metallopeptidase activity);GO:0008270(zinc ion binding);GO:0016787(hydrolase activity);GO:0042277(peptide binding);GO:0043171(peptide catabolic process);GO:0046872(metal ion binding);GO:0070006(metalloaminopeptidase activity)	NA	NA	NA
0	ENSDARG00000069379	zgc:158868	0.515533	0.419553	0.297213	0.13	0.065	2.36741e-34	6.56057e-30	zgc:158868 [Source:ZFIN;Acc:ZDB-GENE-070112-892]	GO:0005575(cellular_component)	NA	NA	NA
0	ENSDARG00000086374	isg15	4.72073	3.17104	0.574054	0.422	0.382	1.97568e-33	5.47499e-29	ISG15 ubiquitin-like modifier [Source:ZFIN;Acc:ZDB-GENE-021211-1]	GO:0005515(protein binding);GO:0005634(nucleus);GO:0005737(cytoplasm);GO:0016567(protein ubiquitination);GO:0019941(modification-dependent protein catabolic process);GO:0031386(protein tag);GO:0031625(ubiquitin protein ligase binding)	NA	NA	NA
0	ENSDARG00000105096	si:ch1073-67j19.1	6.12791	5.05251	0.278394	0.495	0.444	3.70554e-33	1.02688e-28	si:ch1073-67j19.1 [Source:ZFIN;Acc:ZDB-GENE-141216-297]	GO:0005829(cytosol)	NA	NA	NA
0	ENSDARG00000025254	s100a10b	2.26548	1.74222	0.378895	0.238	0.218	3.32788e-28	9.22223e-24	S100 calcium binding protein A10b [Source:ZFIN;Acc:ZDB-GENE-040426-1937]	GO:0005509(calcium ion binding);GO:0005575(cellular_component);GO:0042127(regulation of cell population proliferation);GO:0046872(metal ion binding);GO:0048306(calcium-dependent protein binding)	NA	NA	NA
0	ENSDARG00000089327	BX120005.1	0.993169	0.789666	0.330796	0.178	0.132	4.23453e-27	1.17347e-22	cytotoxic and regulatory T-cell molecule [Source:NCBI gene;Acc:101884219]	GO:0016020(membrane);GO:0016021(integral component of membrane)	NA	K16361	NA
0	ENSDARG00000089362	grn1	1.10467	0.886894	0.316779	0.117	0.127	1.18333e-15	3.27926e-11	granulin 1 [Source:ZFIN;Acc:ZDB-GENE-060103-1]	GO:0008150(biological_process)	NA	NA	NA
1	ENSDARG00000089087	hbba1.1	2.66086	1.10855	1.26321	0.518	0.121	0	0	hemoglobin, beta adult 1 [Source:ZFIN;Acc:ZDB-GENE-990415-18]	GO:0001666(response to hypoxia);GO:0004601(peroxidase activity);GO:0005344(oxygen carrier activity);GO:0005515(protein binding);GO:0005833(hemoglobin complex);GO:0015671(oxygen transport);GO:0019825(oxygen binding);GO:0020037(heme binding);GO:0030097(hemopoiesis);GO:0031720(haptoglobin binding);GO:0031838(haptoglobin-hemoglobin complex);GO:0042744(hydrogen peroxide catabolic process);GO:0043177(o…	NA	K13825	NA
1	ENSDARG00000097011	hbaa1	2.17573	0.949244	1.19665	0.482	0.1	0	0	hemoglobin, alpha adult 1 [Source:ZFIN;Acc:ZDB-GENE-980526-79]	GO:0001666(response to hypoxia);GO:0004601(peroxidase activity);GO:0005344(oxygen carrier activity);GO:0005506(iron ion binding);GO:0005515(protein binding);GO:0005833(hemoglobin complex);GO:0015671(oxygen transport);GO:0019825(oxygen binding);GO:0020037(heme binding);GO:0030097(hemopoiesis);GO:0031720(haptoglobin binding);GO:0031838(haptoglobin-hemoglobin complex);GO:0042744(hydrogen peroxide ca…	NA	K13826	NA
1	ENSDARG00000079078	si:ch211-5k11.8	1.84071	0.899574	1.03295	0.405	0.084	0	0	si:ch211-5k11.8 [Source:ZFIN;Acc:ZDB-GENE-131121-640]	GO:0005344(oxygen carrier activity);GO:0005506(iron ion binding);GO:0005833(hemoglobin complex);GO:0015671(oxygen transport);GO:0019825(oxygen binding);GO:0020037(heme binding);GO:0046872(metal ion binding)	NA	NA	NA
1	ENSDARG00000022303	higd1a	10.5349	5.89209	0.838321	0.952	0.886	0	0	HIG1 hypoxia inducible domain family, member 1A [Source:ZFIN;Acc:ZDB-GENE-030826-15]	GO:0016020(membrane);GO:0016021(integral component of membrane)	NA	NA	NA
1	ENSDARG00000053858	crip1	25.671	14.648	0.809438	0.995	0.958	0	0	cysteine-rich protein 1 [Source:ZFIN;Acc:ZDB-GENE-041111-1]	GO:0003680(AT DNA binding);GO:0005737(cytoplasm);GO:0007507(heart development);GO:0008270(zinc ion binding);GO:0008301(DNA binding, bending);GO:0008630(intrinsic apoptotic signaling pathway in response to DNA damage);GO:0010043(response to zinc ion);GO:0042277(peptide binding);GO:0046872(metal ion binding);GO:0060047(heart contraction);GO:0071236(cellular response to antibiotic);GO:0071493(cellul…	NA	NA	NA
1	ENSDARG00000095908	sat1a.2	24.8432	15.2793	0.701277	0.997	0.975	0	0	spermidine/spermine N1-acetyltransferase 1a, duplicate 2 [Source:ZFIN;Acc:ZDB-GENE-040704-4]	GO:0004145(diamine N-acetyltransferase activity);GO:0005515(protein binding);GO:0005575(cellular_component);GO:0008080(N-acetyltransferase activity);GO:0016740(transferase activity);GO:0019809(spermidine binding);GO:0032918(spermidine acetylation)	00330(Arginine and proline metabolism);04216(Ferroptosis)	K00657	EC:2.3.1.57
1	ENSDARG00000095556	CR318588.4	428.476	289.825	0.564034	1	1	0	0	uncharacterized LOC795545 [Source:NCBI gene;Acc:795545]	NA	NA	NA	NA
1	ENSDARG00000077777	tmsb4x	137.051	110.297	0.313325	1	1	2.04078e-301	5.6554e-297	thymosin beta 4 X-linked [Source:ZFIN;Acc:ZDB-GENE-030131-8304]	GO:0001947(heart looping);GO:0003181(atrioventricular valve morphogenesis);GO:0003779(actin binding);GO:0003785(actin monomer binding);GO:0005737(cytoplasm);GO:0005856(cytoskeleton);GO:0007015(actin filament organization);GO:0030334(regulation of cell migration);GO:0036302(atrioventricular canal development);GO:0042989(sequestering of actin monomers)	04810(Regulation of actin cytoskeleton)	K05764	NA
1	ENSDARG00000104181	tmsb1	18.7482	11.7025	0.679934	0.987	0.944	7.96481e-295	2.20721e-290	thymosin beta 1 [Source:ZFIN;Acc:ZDB-GENE-030131-8575]	GO:0003779(actin binding);GO:0003785(actin monomer binding);GO:0005737(cytoplasm);GO:0005856(cytoskeleton);GO:0007015(actin filament organization);GO:0030334(regulation of cell migration);GO:0042989(sequestering of actin monomers)	NA	NA	NA
1	ENSDARG00000013351	cirbpb	16.5226	11.1027	0.573537	0.995	0.976	5.04919e-281	1.39923e-276	cold inducible RNA binding protein b [Source:ZFIN;Acc:ZDB-GENE-030131-5841]	GO:0003676(nucleic acid binding);GO:0003723(RNA binding);GO:0003730(mRNA 3'-UTR binding);GO:0005575(cellular_component);GO:0005681(spliceosomal complex);GO:0005737(cytoplasm);GO:0008266(poly(U) RNA binding);GO:0009409(response to cold);GO:0017148(negative regulation of translation);GO:0030371(translation repressor activity);GO:0045727(positive regulation of translation);GO:0048026(positive regula…	NA	K13195	NA
1	ENSDARG00000038068	ddx5	13.1106	8.2745	0.663994	0.976	0.943	1.0494e-278	2.90809e-274	DEAD (Asp-Glu-Ala-Asp) box helicase 5 [Source:ZFIN;Acc:ZDB-GENE-030131-925]	GO:0000166(nucleotide binding);GO:0003676(nucleic acid binding);GO:0004386(helicase activity);GO:0005524(ATP binding);GO:0016020(membrane);GO:0016021(integral component of membrane);GO:0016787(hydrolase activity)	03040(Spliceosome)	K12823	EC:3.6.4.13
1	ENSDARG00000104077	fcer1gl	20.7739	14.5196	0.516767	0.994	0.959	5.47354e-254	1.51683e-249	Fc receptor, IgE, high affinity I, gamma polypeptide like [Source:ZFIN;Acc:ZDB-GENE-070502-4]	GO:0016020(membrane);GO:0016021(integral component of membrane)	NA	NA	NA
1	ENSDARG00000097238	hbba1	1.15949	0.665006	0.80205	0.312	0.067	1.85324e-252	5.1357e-248	hemoglobin, beta adult 1 [Source:ZFIN;Acc:ZDB-GENE-990415-18]	GO:0001666(response to hypoxia);GO:0004601(peroxidase activity);GO:0005344(oxygen carrier activity);GO:0005515(protein binding);GO:0005833(hemoglobin complex);GO:0015671(oxygen transport);GO:0019825(oxygen binding);GO:0020037(heme binding);GO:0030097(hemopoiesis);GO:0031720(haptoglobin binding);GO:0031838(haptoglobin-hemoglobin complex);GO:0042744(hydrogen peroxide catabolic process);GO:0043177(o…	NA	K13825	NA
1	ENSDARG00000074851	s1pr4	7.49179	3.95786	0.920592	0.812	0.531	4.63933e-247	1.28565e-242	sphingosine-1-phosphate receptor 4 [Source:ZFIN;Acc:ZDB-GENE-050506-8]	GO:0003376(sphingosine-1-phosphate receptor signaling pathway);GO:0004930(G protein-coupled receptor activity);GO:0007165(signal transduction);GO:0007186(G protein-coupled receptor signaling pathway);GO:0016020(membrane);GO:0016021(integral component of membrane);GO:0030593(neutrophil chemotaxis);GO:0038036(sphingosine-1-phosphate receptor activity)	04068(FoxO signaling pathway);04080(Neuroactive ligand-receptor interaction)	K04293	NA
1	ENSDARG00000103433	rpl14	26.9662	21.1849	0.348116	1	0.984	3.39377e-239	9.40482e-235	ribosomal protein L14 [Source:ZFIN;Acc:ZDB-GENE-030131-2085]	GO:0003723(RNA binding);GO:0003735(structural constituent of ribosome);GO:0005622(intracellular);GO:0005840(ribosome);GO:0006412(translation);GO:0022625(cytosolic large ribosomal subunit);GO:0042273(ribosomal large subunit biogenesis)	03010(Ribosome)	K02875	NA
1	ENSDARG00000029818	srsf5a	2.28265	1.37891	0.727179	0.608	0.403	7.08999e-232	1.96478e-227	serine and arginine rich splicing factor 5a [Source:ZFIN;Acc:ZDB-GENE-030131-7336]	GO:0003676(nucleic acid binding);GO:0003723(RNA binding);GO:0005575(cellular_component);GO:0008150(biological_process)	03040(Spliceosome);05168(Herpes simplex virus 1 infection)	K12893	NA
1	ENSDARG00000036382	ponzr6	7.15667	4.74227	0.593711	0.878	0.821	1.19333e-223	3.30695e-219	plac8 onzin related protein 6 [Source:ZFIN;Acc:ZDB-GENE-081104-326]	NA	NA	NA	NA
1	ENSDARG00000025850	rps21	25.5743	19.9834	0.35589	1	0.977	1.11713e-214	3.09579e-210	ribosomal protein S21 [Source:ZFIN;Acc:ZDB-GENE-040426-1102]	GO:0000447(endonucleolytic cleavage in ITS1 to separate SSU-rRNA from 5.8S rRNA and LSU-rRNA from tricistronic rRNA transcript (SSU-rRNA, 5.8S rRNA, LSU-rRNA));GO:0000461(endonucleolytic cleavage to generate mature 3'-end of SSU-rRNA from (SSU-rRNA, 5.8S rRNA, LSU-rRNA));GO:0002181(cytoplasmic translation);GO:0003735(structural constituent of ribosome);GO:0005622(intracellular);GO:0005737(cytopla…	03010(Ribosome)	K02971	NA
1	ENSDARG00000053979	chmp2a	4.87083	3.10953	0.647471	0.805	0.717	6.86948e-211	1.90367e-206	charged multivesicular body protein 2A [Source:ZFIN;Acc:ZDB-GENE-040426-2922]	GO:0007034(vacuolar transport)	04144(Endocytosis);04217(Necroptosis)	K12191	NA
1	ENSDARG00000101406	rplp2	29.8678	23.0131	0.376141	0.999	0.981	5.93297e-209	1.64414e-204	ribosomal protein, large P2 [Source:ZFIN;Acc:ZDB-GENE-031018-2]	GO:0003735(structural constituent of ribosome);GO:0005622(intracellular);GO:0005840(ribosome);GO:0006414(translational elongation)	03010(Ribosome)	K02943	NA
1	ENSDARG00000028389	rab44	5.03064	2.74752	0.872611	0.728	0.541	3.99416e-201	1.10686e-196	RAB44, member RAS oncogene family [Source:ZFIN;Acc:ZDB-GENE-040724-117]	GO:0003924(GTPase activity);GO:0005525(GTP binding);GO:0005623(cell);GO:0006886(intracellular protein transport);GO:0032482(Rab protein signal transduction)	NA	NA	NA
1	ENSDARG00000114387	CU499336.2	9.57379	6.45098	0.569572	0.949	0.898	3.6294e-200	1.00578e-195	NA	NA	NA	NA	NA
1	ENSDARG00000055365	si:dkey-25e12.3	6.52209	4.07106	0.679929	0.853	0.752	6.66964e-196	1.84829e-191	si:dkey-25e12.3 [Source:ZFIN;Acc:ZDB-GENE-041001-132]	GO:0000166(nucleotide binding);GO:0003824(catalytic activity);GO:0005634(nucleus);GO:0005737(cytoplasm);GO:0016787(hydrolase activity)	NA	NA	NA
1	ENSDARG00000078547	si:ch211-264f5.2	11.6844	7.76254	0.589977	0.959	0.907	1.90717e-195	5.28514e-191	si:ch211-264f5.2 [Source:ZFIN;Acc:ZDB-GENE-080303-2]	GO:0016020(membrane);GO:0016021(integral component of membrane)	NA	NA	NA
1	ENSDARG00000099148	bzw1b	17.3021	10.6431	0.701027	0.934	0.888	5.55804e-182	1.54024e-177	basic leucine zipper and W2 domains 1b [Source:ZFIN;Acc:ZDB-GENE-040426-2881]	GO:0005515(protein binding)	NA	NA	NA
1	ENSDARG00000093124	scpp8	14.9238	7.68325	0.957828	0.888	0.771	4.55081e-181	1.26112e-176	secretory calcium-binding phosphoprotein 8 [Source:ZFIN;Acc:ZDB-GENE-090424-2]	NA	NA	NA	NA
1	ENSDARG00000005481	nfkbiaa	82.9005	56.4092	0.555451	0.999	0.995	3.95457e-180	1.09589e-175	nuclear factor of kappa light polypeptide gene enhancer in B-cells inhibitor, alpha a [Source:ZFIN;Acc:ZDB-GENE-040426-2227]	GO:0005515(protein binding);GO:0009615(response to virus);GO:1901532(regulation of hematopoietic progenitor cell differentiation);GO:1901533(negative regulation of hematopoietic progenitor cell differentiation)	04210(Apoptosis);04620(Toll-like receptor signaling pathway);04621(NOD-like receptor signaling pathway);04622(RIG-I-like receptor signaling pathway);04623(Cytosolic DNA-sensing pathway);04625(C-type lectin receptor signaling pathway);04920(Adipocytokine signaling pathway);05168(Herpes simplex virus 1 infection)	K04734	NA
1	ENSDARG00000069734	hbba2	0.604644	0.415637	0.54076	0.19	0.031	5.71344e-178	1.58331e-173	hemoglobin, beta adult 2 [Source:ZFIN;Acc:ZDB-GENE-040801-164]	GO:0004601(peroxidase activity);GO:0005344(oxygen carrier activity);GO:0005515(protein binding);GO:0005833(hemoglobin complex);GO:0015671(oxygen transport);GO:0019825(oxygen binding);GO:0020037(heme binding);GO:0031720(haptoglobin binding);GO:0031838(haptoglobin-hemoglobin complex);GO:0042744(hydrogen peroxide catabolic process);GO:0043177(organic acid binding);GO:0046872(metal ion binding);GO:00…	NA	K13825	NA
1	ENSDARG00000039490	pitpnaa	2.26528	1.50592	0.589042	0.589	0.474	1.78511e-171	4.94689e-167	phosphatidylinositol transfer protein, alpha a [Source:ZFIN;Acc:ZDB-GENE-040426-744]	GO:0005548(phospholipid transporter activity);GO:0005622(intracellular);GO:0005634(nucleus);GO:0005737(cytoplasm);GO:0005829(cytosol);GO:0007409(axonogenesis);GO:0008525(phosphatidylcholine transporter activity);GO:0008526(phosphatidylinositol transporter activity);GO:0015914(phospholipid transport);GO:0031210(phosphatidylcholine binding);GO:0035091(phosphatidylinositol binding);GO:0043009(chorda…	NA	NA	NA
1	ENSDARG00000070437	rpl22	21.8737	17.5156	0.32056	0.998	0.973	4.1411e-169	1.14758e-164	ribosomal protein L22 [Source:ZFIN;Acc:ZDB-GENE-051113-276]	GO:0003723(RNA binding);GO:0003735(structural constituent of ribosome);GO:0005622(intracellular);GO:0005840(ribosome);GO:0006412(translation);GO:0022625(cytosolic large ribosomal subunit);GO:0033077(T cell differentiation in thymus)	03010(Ribosome)	K02891	NA
1	ENSDARG00000009978	icn	43.9557	28.0458	0.648265	0.898	0.858	2.50228e-162	6.93432e-158	ictacalcin [Source:ZFIN;Acc:ZDB-GENE-030131-8599]	GO:0005509(calcium ion binding);GO:0046872(metal ion binding);GO:0046914(transition metal ion binding)	NA	NA	NA
1	ENSDARG00000104636	si:dkey-112a7.4	8.29591	5.61806	0.562328	0.922	0.866	3.72257e-162	1.0316e-157	si:dkey-112a7.4 [Source:ZFIN;Acc:ZDB-GENE-030131-9661]	GO:0004860(protein kinase inhibitor activity);GO:0006469(negative regulation of protein kinase activity)	NA	NA	NA
1	ENSDARG00000038076	romo1	8.26341	5.94476	0.47512	0.942	0.884	1.2014e-161	3.32932e-157	reactive oxygen species modulator 1 [Source:ZFIN;Acc:ZDB-GENE-040426-1768]	GO:0001302(replicative cell aging);GO:0003674(molecular_function);GO:0005739(mitochondrion);GO:0005743(mitochondrial inner membrane);GO:0005744(TIM23 mitochondrial import inner membrane translocase complex);GO:0008284(positive regulation of cell population proliferation);GO:0016020(membrane);GO:0016021(integral component of membrane);GO:0030150(protein import into mitochondrial matrix);GO:0034614…	NA	NA	NA
1	ENSDARG00000071203	sptssa	2.2168	1.52346	0.541128	0.614	0.484	2.4871e-160	6.89225e-156	serine palmitoyltransferase, small subunit A [Source:ZFIN;Acc:ZDB-GENE-050320-26]	GO:0004758(serine C-palmitoyltransferase activity);GO:0005783(endoplasmic reticulum);GO:0005789(endoplasmic reticulum membrane);GO:0006629(lipid metabolic process);GO:0006665(sphingolipid metabolic process);GO:0016020(membrane);GO:0016021(integral component of membrane);GO:0017059(serine C-palmitoyltransferase complex)	NA	NA	NA
1	ENSDARG00000101479	BX908782.2	120.883	78.3079	0.626383	0.997	0.994	9.92611e-160	2.75072e-155	CD59 glycoprotein-like [Source:NCBI gene;Acc:103910140]	GO:0001971(negative regulation of activation of membrane attack complex)	NA	NA	NA
1	ENSDARG00000007682	ppdpfa	6.27009	4.14339	0.597675	0.872	0.777	1.01723e-159	2.81896e-155	pancreatic progenitor cell differentiation and proliferation factor a [Source:ZFIN;Acc:ZDB-GENE-030219-204]	GO:0001708(cell fate specification);GO:0007275(multicellular organism development);GO:0008283(cell population proliferation);GO:0030154(cell differentiation);GO:0031017(exocrine pancreas development)	NA	NA	NA
1	ENSDARG00000068434	h3f3b.1.2	3.36927	2.17949	0.628446	0.69	0.533	1.16058e-155	3.2162e-151	H3 histone, family 3B.1 [Source:ZFIN;Acc:ZDB-GENE-050417-65]	GO:0000786(nucleosome);GO:0003677(DNA binding);GO:0005634(nucleus);GO:0005694(chromosome);GO:0031492(nucleosomal DNA binding);GO:0046982(protein heterodimerization activity)	NA	K11253	NA
1	ENSDARG00000105068	SMIM22	3.96493	2.78482	0.509712	0.783	0.704	7.59823e-154	2.10562e-149	si:ch1073-443f11.2 [Source:ZFIN;Acc:ZDB-GENE-120215-185]	GO:0016020(membrane);GO:0016021(integral component of membrane)	NA	NA	NA
1	ENSDARG00000068708	ifrd1	2.88729	1.93142	0.580055	0.644	0.546	1.16087e-151	3.21701e-147	interferon-related developmental regulator 1 [Source:ZFIN;Acc:ZDB-GENE-030131-6132]	GO:0005575(cellular_component);GO:0005634(nucleus);GO:0008150(biological_process)	NA	NA	NA
1	ENSDARG00000105232	si:ch211-260e23.8	2.2117	1.41798	0.641323	0.534	0.37	1.55451e-147	4.30785e-143	si:ch211-260e23.8 [Source:ZFIN;Acc:ZDB-GENE-141216-116]	NA	NA	NA	NA
1	ENSDARG00000025147	cd63	26.0142	20.8945	0.316176	0.998	0.991	8.06615e-147	2.23529e-142	CD63 molecule [Source:ZFIN;Acc:ZDB-GENE-030131-180]	GO:0005887(integral component of plasma membrane);GO:0007166(cell surface receptor signaling pathway);GO:0016020(membrane);GO:0016021(integral component of membrane);GO:0035188(hatching)	04142(Lysosome)	K06497	NA
1	ENSDARG00000113899	zgc:77650	8.68161	6.41647	0.436183	0.916	0.883	2.08451e-146	5.77658e-142	zgc:77650 [Source:ZFIN;Acc:ZDB-GENE-030131-6151]	GO:0000166(nucleotide binding);GO:0005525(GTP binding);GO:0005737(cytoplasm);GO:0005794(Golgi apparatus);GO:0005886(plasma membrane);GO:0006886(intracellular protein transport);GO:0006890(retrograde vesicle-mediated transport, Golgi to endoplasmic reticulum);GO:0006893(Golgi to plasma membrane transport);GO:0016192(vesicle-mediated transport)	NA	K07939	NA
1	ENSDARG00000075261	timp2b	80.2122	56.7263	0.499802	0.991	0.978	2.23356e-144	6.18964e-140	TIMP metallopeptidase inhibitor 2b [Source:ZFIN;Acc:ZDB-GENE-040426-2655]	GO:0002020(protease binding);GO:0005515(protein binding);GO:0005576(extracellular region);GO:0005615(extracellular space);GO:0008191(metalloendopeptidase inhibitor activity);GO:0009725(response to hormone);GO:0010033(response to organic substance);GO:0010951(negative regulation of endopeptidase activity);GO:0031012(extracellular matrix);GO:0034097(response to cytokine);GO:0051045(negative regulat…	NA	NA	NA
1	ENSDARG00000052322	tlr5b	11.817	7.61202	0.63451	0.887	0.817	8.55161e-144	2.36982e-139	toll-like receptor 5b [Source:ZFIN;Acc:ZDB-GENE-040219-15]	GO:0002253(activation of immune response);GO:0002376(immune system process);GO:0005515(protein binding);GO:0007165(signal transduction);GO:0016020(membrane);GO:0016021(integral component of membrane);GO:0035325(Toll-like receptor binding);GO:0045087(innate immune response);GO:0046982(protein heterodimerization activity)	04620(Toll-like receptor signaling pathway);05132(Salmonella infection)	K10168	NA
1	ENSDARG00000111188	cdaa	7.51156	4.70021	0.676386	0.808	0.625	2.66211e-142	7.37724e-138	cytidine deaminase a [Source:ZFIN;Acc:ZDB-GENE-170609-2]	GO:0003824(catalytic activity);GO:0004126(cytidine deaminase activity);GO:0008270(zinc ion binding);GO:0009972(cytidine deamination);GO:0016787(hydrolase activity);GO:0046872(metal ion binding)	00240(Pyrimidine metabolism);00983(Drug metabolism - other enzymes)	K01489	EC:3.5.4.5
1	ENSDARG00000109289	mrps15	4.42537	3.04922	0.537354	0.792	0.714	5.52878e-141	1.53214e-136	mitochondrial ribosomal protein S15 [Source:ZFIN;Acc:ZDB-GENE-040718-188]	GO:0003735(structural constituent of ribosome);GO:0005622(intracellular);GO:0005739(mitochondrion);GO:0005763(mitochondrial small ribosomal subunit);GO:0005840(ribosome);GO:0006412(translation)	03010(Ribosome)	K02956	NA
1	ENSDARG00000074287	sptlc2b	3.53474	2.30965	0.613929	0.672	0.542	8.15454e-141	2.25978e-136	serine palmitoyltransferase, long chain base subunit 2b [Source:ZFIN;Acc:ZDB-GENE-080305-8]	GO:0003824(catalytic activity);GO:0009058(biosynthetic process);GO:0016020(membrane);GO:0016021(integral component of membrane);GO:0016740(transferase activity);GO:0030170(pyridoxal phosphate binding)	00600(Sphingolipid metabolism)	K00654	EC:2.3.1.50
1	ENSDARG00000007823	atf3	20.6832	13.6066	0.604153	0.953	0.904	2.49444e-140	6.91258e-136	activating transcription factor 3 [Source:ZFIN;Acc:ZDB-GENE-040426-728]	GO:0000978(RNA polymerase II proximal promoter sequence-specific DNA binding);GO:0003677(DNA binding);GO:0003700(DNA-binding transcription factor activity);GO:0005634(nucleus);GO:0006355(regulation of transcription, DNA-templated);GO:0006357(regulation of transcription by RNA polymerase II);GO:0009615(response to virus)	NA	K09032	NA
1	ENSDARG00000030938	fermt3b	3.44631	2.29396	0.587208	0.687	0.59	5.60409e-140	1.55301e-135	fermitin family member 3b [Source:ZFIN;Acc:ZDB-GENE-040426-1366]	GO:0007229(integrin-mediated signaling pathway)	NA	K17084	NA
1	ENSDARG00000008363	mcl1b	3.68344	2.40694	0.61385	0.702	0.575	1.1754e-139	3.25727e-135	MCL1, BCL2 family apoptosis regulator b [Source:ZFIN;Acc:ZDB-GENE-030825-1]	GO:0005741(mitochondrial outer membrane);GO:0007088(regulation of mitotic nuclear division);GO:0008630(intrinsic apoptotic signaling pathway in response to DNA damage);GO:0042803(protein homodimerization activity);GO:0042981(regulation of apoptotic process);GO:0043009(chordate embryonic development);GO:0043066(negative regulation of apoptotic process);GO:0043154(negative regulation of cysteine-ty…	NA	NA	NA
1	ENSDARG00000015551	fth1a	58.6586	38.623	0.60288	0.988	0.977	6.67598e-137	1.85005e-132	ferritin, heavy polypeptide 1a [Source:ZFIN;Acc:ZDB-GENE-000831-2]	GO:0004322(ferroxidase activity);GO:0005506(iron ion binding);GO:0005737(cytoplasm);GO:0006826(iron ion transport);GO:0006879(cellular iron ion homeostasis);GO:0006880(intracellular sequestering of iron ion);GO:0008198(ferrous iron binding);GO:0008199(ferric iron binding);GO:0042802(identical protein binding);GO:0046872(metal ion binding);GO:0055114(oxidation-reduction process)	04216(Ferroptosis);04217(Necroptosis)	K00522	EC:1.16.3.2
1	ENSDARG00000029064	uqcrq	2.32156	1.71823	0.434171	0.613	0.566	6.88523e-137	1.90804e-132	ubiquinol-cytochrome c reductase, complex III subunit VII [Source:ZFIN;Acc:ZDB-GENE-040718-199]	GO:0005750(mitochondrial respiratory chain complex III);GO:0006122(mitochondrial electron transport, ubiquinol to cytochrome c);GO:0008121(ubiquinol-cytochrome-c reductase activity)	00190(Oxidative phosphorylation);04260(Cardiac muscle contraction)	K00418	NA
1	ENSDARG00000092115	eif4a1a	6.45339	4.57701	0.495652	0.878	0.802	3.20488e-135	8.88137e-131	eukaryotic translation initiation factor 4A1A [Source:ZFIN;Acc:ZDB-GENE-031030-2]	GO:0003676(nucleic acid binding);GO:0003743(translation initiation factor activity);GO:0004004(ATP-dependent RNA helicase activity);GO:0005524(ATP binding);GO:0006413(translational initiation)	03013(RNA transport)	K03257	NA
1	ENSDARG00000044039	stx11a	5.84292	3.77598	0.629838	0.795	0.709	3.28805e-134	9.11184e-130	syntaxin 11a [Source:ZFIN;Acc:ZDB-GENE-040426-2564]	GO:0000149(SNARE binding);GO:0005484(SNAP receptor activity);GO:0005794(Golgi apparatus);GO:0005886(plasma membrane);GO:0006886(intracellular protein transport);GO:0006887(exocytosis);GO:0006906(vesicle fusion);GO:0008021(synaptic vesicle);GO:0012505(endomembrane system);GO:0016020(membrane);GO:0016021(integral component of membrane);GO:0016192(vesicle-mediated transport);GO:0031201(SNARE complex…	04130(SNARE interactions in vesicular transport)	K08487	NA
1	ENSDARG00000038577	cox6c	2.92217	2.18514	0.419319	0.7	0.65	3.71618e-132	1.02983e-127	cytochrome c oxidase subunit 6C [Source:ZFIN;Acc:ZDB-GENE-040724-95]	GO:0004129(cytochrome-c oxidase activity);GO:0022900(electron transport chain);GO:1902600(proton transmembrane transport)	00190(Oxidative phosphorylation);04260(Cardiac muscle contraction)	K02268	NA
1	ENSDARG00000100588	rpl36	18.1044	14.8078	0.289985	0.995	0.959	4.56503e-131	1.26506e-126	ribosomal protein L36 [Source:ZFIN;Acc:ZDB-GENE-040622-2]	GO:0002181(cytoplasmic translation);GO:0003735(structural constituent of ribosome);GO:0005622(intracellular);GO:0005737(cytoplasm);GO:0005829(cytosol);GO:0005840(ribosome);GO:0006412(translation);GO:0007420(brain development);GO:0022625(cytosolic large ribosomal subunit);GO:0051726(regulation of cell cycle)	03010(Ribosome)	K02920	NA
1	ENSDARG00000018637	sec61g	13.4984	9.92657	0.443421	0.972	0.923	4.34232e-130	1.20334e-125	Sec61 translocon gamma subunit [Source:ZFIN;Acc:ZDB-GENE-040718-203]	GO:0005623(cell);GO:0006605(protein targeting);GO:0006886(intracellular protein transport);GO:0015031(protein transport);GO:0015450(P-P-bond-hydrolysis-driven protein transmembrane transporter activity);GO:0016020(membrane);GO:0016021(integral component of membrane);GO:0071806(protein transmembrane transport)	03060(Protein export);04141(Protein processing in endoplasmic reticulum);04145(Phagosome)	K07342	NA
1	ENSDARG00000007323	chmp4bb	3.61195	2.58168	0.484464	0.737	0.665	7.4779e-129	2.07228e-124	charged multivesicular body protein 4Bb [Source:ZFIN;Acc:ZDB-GENE-040426-2812]	GO:0005737(cytoplasm);GO:0005768(endosome);GO:0005829(cytosol);GO:0007034(vacuolar transport);GO:0009838(abscission);GO:0015031(protein transport);GO:0016020(membrane);GO:0031902(late endosome membrane);GO:0032466(negative regulation of cytokinesis);GO:0044878(mitotic cytokinesis checkpoint)	04144(Endocytosis);04217(Necroptosis)	K12194	NA
1	ENSDARG00000103718	chmp5b	2.63221	1.9105	0.462319	0.636	0.579	5.96247e-128	1.65232e-123	charged multivesicular body protein 5b [Source:ZFIN;Acc:ZDB-GENE-040426-1374]	GO:0003674(molecular_function);GO:0005737(cytoplasm);GO:0005768(endosome);GO:0005829(cytosol);GO:0007034(vacuolar transport);GO:0010008(endosome membrane);GO:0015031(protein transport);GO:0016020(membrane)	04144(Endocytosis);04217(Necroptosis)	K12198	NA
1	ENSDARG00000036161	hnrnpa0l.1	14.2707	10.6145	0.427018	0.983	0.969	7.22337e-127	2.00174e-122	heterogeneous nuclear ribonucleoprotein A0, like [Source:ZFIN;Acc:ZDB-GENE-030131-618]	GO:0003676(nucleic acid binding);GO:0003723(RNA binding)	NA	NA	NA
1	ENSDARG00000102599	si:ch1073-392o20.2	3.29561	2.21396	0.573916	0.676	0.552	4.31647e-124	1.19618e-119	si:ch1073-392o20.2 [Source:ZFIN;Acc:ZDB-GENE-091204-431]	GO:0005768(endosome);GO:0005802(trans-Golgi network);GO:0016020(membrane);GO:0016021(integral component of membrane);GO:0030140(trans-Golgi network transport vesicle)	NA	NA	NA
1	ENSDARG00000099839	si:ch211-9d9.1	12.7856	7.52808	0.764164	0.783	0.698	5.36785e-124	1.48754e-119	si:ch211-9d9.1 [Source:ZFIN;Acc:ZDB-GENE-030131-2657]	GO:0001971(negative regulation of activation of membrane attack complex);GO:0003676(nucleic acid binding);GO:0003677(DNA binding)	NA	NA	NA
1	ENSDARG00000007377	odc1	14.4411	10.0159	0.527895	0.941	0.921	1.36268e-122	3.77625e-118	ornithine decarboxylase 1 [Source:ZFIN;Acc:ZDB-GENE-010816-1]	GO:0003824(catalytic activity);GO:0004586(ornithine decarboxylase activity);GO:0005737(cytoplasm);GO:0006596(polyamine biosynthetic process);GO:0033387(putrescine biosynthetic process from ornithine);GO:0042462(eye photoreceptor cell development)	00330(Arginine and proline metabolism);00480(Glutathione metabolism)	K01581	EC:4.1.1.17
1	ENSDARG00000015657	zgc:77112	4.24507	2.93483	0.532511	0.727	0.656	3.36651e-121	9.32929e-117	zgc:77112 [Source:ZFIN;Acc:ZDB-GENE-040426-2219]	GO:0000164(protein phosphatase type 1 complex);GO:0001878(response to yeast);GO:0005515(protein binding);GO:0005975(carbohydrate metabolic process);GO:0005977(glycogen metabolic process);GO:0005981(regulation of glycogen catabolic process);GO:0019888(protein phosphatase regulator activity);GO:0043666(regulation of phosphoprotein phosphatase activity)	04910(Insulin signaling pathway)	K07189	NA
1	ENSDARG00000092693	tpt1	38.9295	31.7682	0.293283	1	0.994	4.66698e-121	1.29331e-116	tumor protein, translationally-controlled 1 [Source:ZFIN;Acc:ZDB-GENE-990603-10]	GO:0005509(calcium ion binding);GO:0005737(cytoplasm)	NA	NA	NA
1	ENSDARG00000032103	mapk6	2.392	1.67609	0.513118	0.593	0.469	1.47768e-120	4.09495e-116	mitogen-activated protein kinase 6 [Source:ZFIN;Acc:ZDB-GENE-050420-7]	GO:0000165(MAPK cascade);GO:0004672(protein kinase activity);GO:0004707(MAP kinase activity);GO:0005524(ATP binding);GO:0005634(nucleus);GO:0005737(cytoplasm);GO:0006468(protein phosphorylation);GO:0010468(regulation of gene expression);GO:0016301(kinase activity);GO:0016310(phosphorylation);GO:0035556(intracellular signal transduction);GO:0071310(cellular response to organic substance)	NA	K06855	EC:2.7.11.24
1	ENSDARG00000026865	fam107b	2.19368	1.56321	0.488835	0.551	0.472	8.47168e-120	2.34767e-115	family with sequence similarity 107 member B [Source:ZFIN;Acc:ZDB-GENE-031030-12]	GO:0003674(molecular_function);GO:0005575(cellular_component);GO:0008150(biological_process)	NA	NA	NA
1	ENSDARG00000035652	sat1a.1	1.45521	0.994004	0.549902	0.419	0.289	5.70829e-118	1.58188e-113	spermidine/spermine N1-acetyltransferase 1a, duplicate 1 [Source:ZFIN;Acc:ZDB-GENE-050913-41]	GO:0004145(diamine N-acetyltransferase activity);GO:0005515(protein binding);GO:0008080(N-acetyltransferase activity);GO:0019809(spermidine binding);GO:0032918(spermidine acetylation)	00330(Arginine and proline metabolism);04216(Ferroptosis)	K00657	EC:2.3.1.57
1	ENSDARG00000038141	atf4b	7.50005	5.59947	0.421608	0.928	0.896	1.60861e-117	4.45779e-113	activating transcription factor 4b [Source:ZFIN;Acc:ZDB-GENE-070928-23]	GO:0000977(RNA polymerase II regulatory region sequence-specific DNA binding);GO:0000981(DNA-binding transcription factor activity, RNA polymerase II-specific);GO:0003700(DNA-binding transcription factor activity);GO:0005634(nucleus);GO:0005737(cytoplasm);GO:0006355(regulation of transcription, DNA-templated);GO:0006357(regulation of transcription by RNA polymerase II)	04010(MAPK signaling pathway);04137(Mitophagy - animal);04141(Protein processing in endoplasmic reticulum);04210(Apoptosis);04261(Adrenergic signaling in cardiomyocytes);04912(GnRH signaling pathway)	K04374	NA
1	ENSDARG00000104537	cox7c	4.14899	3.10824	0.41666	0.795	0.751	1.05731e-116	2.93001e-112	cytochrome c oxidase subunit 7C [Source:ZFIN;Acc:ZDB-GENE-030131-8062]	GO:0004129(cytochrome-c oxidase activity);GO:0005739(mitochondrion);GO:0006123(mitochondrial electron transport, cytochrome c to oxygen);GO:0016020(membrane);GO:0016021(integral component of membrane);GO:1902600(proton transmembrane transport)	00190(Oxidative phosphorylation);04260(Cardiac muscle contraction)	K02272	NA
1	ENSDARG00000038576	ube2d1b	3.48975	2.63522	0.405199	0.715	0.695	2.06911e-116	5.73392e-112	ubiquitin-conjugating enzyme E2D 1b [Source:ZFIN;Acc:ZDB-GENE-030131-2735]	GO:0000151(ubiquitin ligase complex);GO:0000166(nucleotide binding);GO:0000209(protein polyubiquitination);GO:0005524(ATP binding);GO:0006511(ubiquitin-dependent protein catabolic process);GO:0016740(transferase activity);GO:0031398(positive regulation of protein ubiquitination);GO:0031625(ubiquitin protein ligase binding);GO:0061631(ubiquitin conjugating enzyme activity)	04120(Ubiquitin mediated proteolysis);04141(Protein processing in endoplasmic reticulum)	K06689	EC:2.3.2.23
1	ENSDARG00000076223	SERP1	2.10279	1.5946	0.399112	0.572	0.523	2.70885e-115	7.50677e-111	zgc:92744 [Source:ZFIN;Acc:ZDB-GENE-040718-312]	GO:0003674(molecular_function);GO:0005783(endoplasmic reticulum);GO:0005789(endoplasmic reticulum membrane);GO:0006486(protein glycosylation);GO:0015031(protein transport);GO:0016020(membrane);GO:0016021(integral component of membrane);GO:0030968(endoplasmic reticulum unfolded protein response);GO:0071391(cellular response to estrogen stimulus)	NA	NA	NA
1	ENSDARG00000093193	chia.6.1	5.95599	4.09725	0.539685	0.801	0.688	1.19373e-114	3.30807e-110	chitinase, acidic.6 [Source:ZFIN;Acc:ZDB-GENE-030131-1140]	GO:0004553(hydrolase activity, hydrolyzing O-glycosyl compounds);GO:0004568(chitinase activity);GO:0005576(extracellular region);GO:0005737(cytoplasm);GO:0005975(carbohydrate metabolic process);GO:0006030(chitin metabolic process);GO:0006032(chitin catabolic process);GO:0008061(chitin binding)	00520(Amino sugar and nucleotide sugar metabolism)	K01183	EC:3.2.1.14
1	ENSDARG00000009505	prelid3b	6.59869	4.98669	0.404097	0.917	0.875	2.40534e-114	6.66566e-110	PRELI domain containing 3 [Source:ZFIN;Acc:ZDB-GENE-031002-13]	GO:0005758(mitochondrial intermembrane space);GO:0015914(phospholipid transport);GO:1990050(phosphatidic acid transporter activity)	NA	NA	NA
1	ENSDARG00000035860	rps28	17.0834	13.8264	0.305173	0.994	0.961	7.50661e-110	2.08023e-105	ribosomal protein S28 [Source:ZFIN;Acc:ZDB-GENE-030131-2022]	GO:0000028(ribosomal small subunit assembly);GO:0002181(cytoplasmic translation);GO:0003735(structural constituent of ribosome);GO:0005622(intracellular);GO:0005737(cytoplasm);GO:0005783(endoplasmic reticulum);GO:0005791(rough endoplasmic reticulum);GO:0005829(cytosol);GO:0005840(ribosome);GO:0006412(translation);GO:0022627(cytosolic small ribosomal subunit);GO:0030490(maturation of SSU-rRNA);GO:…	03010(Ribosome)	K02979	NA
1	ENSDARG00000009753	sf3b6	1.55478	1.19514	0.379528	0.47	0.43	7.99771e-110	2.21632e-105	splicing factor 3b, subunit 6 [Source:ZFIN;Acc:ZDB-GENE-040625-36]	GO:0000398(mRNA splicing, via spliceosome);GO:0003676(nucleic acid binding);GO:0003723(RNA binding);GO:0005686(U2 snRNP);GO:0005689(U12-type spliceosomal complex);GO:0071013(catalytic step 2 spliceosome)	03040(Spliceosome)	K12833	NA
1	ENSDARG00000068233	zgc:64051	7.0958	5.35735	0.405444	0.919	0.887	2.39194e-109	6.62855e-105	zgc:64051 [Source:ZFIN;Acc:ZDB-GENE-040426-1349]	GO:0003674(molecular_function);GO:0005887(integral component of plasma membrane);GO:0007166(cell surface receptor signaling pathway);GO:0016020(membrane);GO:0016021(integral component of membrane)	NA	K06489	NA
1	ENSDARG00000032868	pde4ba	9.54996	6.88621	0.471784	0.928	0.874	1.49273e-107	4.13666e-103	phosphodiesterase 4B, cAMP-specific a [Source:ZFIN;Acc:ZDB-GENE-030131-9570]	GO:0004114(3',5'-cyclic-nucleotide phosphodiesterase activity);GO:0004115(3',5'-cyclic-AMP phosphodiesterase activity);GO:0005515(protein binding);GO:0005829(cytosol);GO:0007165(signal transduction);GO:0008081(phosphoric diester hydrolase activity);GO:0016787(hydrolase activity);GO:0030552(cAMP binding);GO:0044325(ion channel binding);GO:0046872(metal ion binding)	00230(Purine metabolism)	K13293	EC:3.1.4.53
1	ENSDARG00000078619	pnp5a	37.7392	28.0861	0.426205	0.991	0.981	2.31677e-107	6.42022e-103	purine nucleoside phosphorylase 5a [Source:ZFIN;Acc:ZDB-GENE-040426-2553]	GO:0003824(catalytic activity);GO:0004731(purine-nucleoside phosphorylase activity);GO:0005737(cytoplasm);GO:0006139(nucleobase-containing compound metabolic process);GO:0009116(nucleoside metabolic process);GO:0016740(transferase activity);GO:0016757(transferase activity, transferring glycosyl groups)	00230(Purine metabolism);00240(Pyrimidine metabolism);00760(Nicotinate and nicotinamide metabolism)	K03783	EC:2.4.2.1
1	ENSDARG00000102482	zgc:165573	2.74861	2.05077	0.422538	0.639	0.589	4.71206e-106	1.30581e-101	zgc:165573 [Source:ZFIN;Acc:ZDB-GENE-070615-27]	GO:0003674(molecular_function);GO:0005886(plasma membrane);GO:0016020(membrane);GO:0016021(integral component of membrane)	NA	NA	NA
1	ENSDARG00000094485	si:dkey-27h10.2	7.81708	5.95035	0.393656	0.912	0.86	9.23757e-106	2.55992e-101	si:dkey-27h10.2 [Source:ZFIN;Acc:ZDB-GENE-090313-296]	GO:0016020(membrane);GO:0016021(integral component of membrane)	NA	NA	NA
1	ENSDARG00000058354	selenot1a	2.33146	1.82726	0.351549	0.61	0.586	3.18708e-104	8.83203e-100	selenoprotein T, 1a [Source:ZFIN;Acc:ZDB-GENE-030327-6]	GO:0004791(thioredoxin-disulfide reductase activity);GO:0005783(endoplasmic reticulum);GO:0005789(endoplasmic reticulum membrane);GO:0016020(membrane);GO:0016021(integral component of membrane);GO:0016491(oxidoreductase activity);GO:0055114(oxidation-reduction process);GO:0098869(cellular oxidant detoxification)	NA	K22366	NA
1	ENSDARG00000012972	cfl1l	9.41422	7.11274	0.404436	0.926	0.845	3.98241e-104	1.10361e-99	cofilin 1 (non-muscle), like [Source:ZFIN;Acc:ZDB-GENE-040426-2770]	GO:0003779(actin binding);GO:0005622(intracellular);GO:0015629(actin cytoskeleton);GO:0030042(actin filament depolymerization)	04810(Regulation of actin cytoskeleton)	K05765	NA
1	ENSDARG00000052859	chp1	1.54297	1.21868	0.340395	0.478	0.442	5.10249e-104	1.414e-99	calcineurin-like EF-hand protein 1 [Source:ZFIN;Acc:ZDB-GENE-030131-4086]	GO:0005509(calcium ion binding);GO:0005575(cellular_component)	NA	K17610	NA
1	ENSDARG00000045051	slc16a3	2.24779	1.61572	0.476326	0.53	0.458	3.0326e-103	8.40394e-99	solute carrier family 16 (monocarboxylate transporter), member 3 [Source:ZFIN;Acc:ZDB-GENE-030131-5487]	GO:0005887(integral component of plasma membrane);GO:0008028(monocarboxylic acid transmembrane transporter activity);GO:0015129(lactate transmembrane transporter activity);GO:0015718(monocarboxylic acid transport);GO:0016020(membrane);GO:0016021(integral component of membrane);GO:0035873(lactate transmembrane transport);GO:0055085(transmembrane transport)	NA	K08180	NA
1	ENSDARG00000043003	pcyt2	1.67915	1.23808	0.439626	0.475	0.393	2.70642e-101	7.50002e-97	phosphate cytidylyltransferase 2, ethanolamine [Source:ZFIN;Acc:ZDB-GENE-041010-132]	GO:0003824(catalytic activity);GO:0005575(cellular_component);GO:0009058(biosynthetic process)	00440(Phosphonate and phosphinate metabolism);00564(Glycerophospholipid metabolism)	K00967	EC:2.7.7.14
1	ENSDARG00000010641	slc20a1b	2.79532	2.02309	0.466453	0.608	0.524	4.41701e-101	1.22404e-96	solute carrier family 20 (phosphate transporter), member 1b [Source:ZFIN;Acc:ZDB-GENE-030131-260]	GO:0005315(inorganic phosphate transmembrane transporter activity);GO:0006817(phosphate ion transport);GO:0016020(membrane);GO:0016021(integral component of membrane);GO:0055085(transmembrane transport)	NA	K14640	NA
1	ENSDARG00000012140	ccnl1b	2.47979	1.84797	0.424272	0.609	0.54	5.60506e-101	1.55327e-96	cyclin L1b [Source:ZFIN;Acc:ZDB-GENE-030131-4813]	GO:0000079(regulation of cyclin-dependent protein serine/threonine kinase activity);GO:0005634(nucleus);GO:0006355(regulation of transcription, DNA-templated);GO:0006396(RNA processing)	NA	NA	NA
1	ENSDARG00000117263	CABZ01056054.1	2.77572	1.95829	0.503268	0.6	0.494	7.38944e-101	2.04776e-96	NA	NA	NA	NA	NA
1	ENSDARG00000012688	eif1b	8.32969	6.37353	0.386171	0.945	0.917	1.60776e-100	4.45543e-96	eukaryotic translation initiation factor 1B [Source:ZFIN;Acc:ZDB-GENE-030131-956]	GO:0003723(RNA binding);GO:0003743(translation initiation factor activity);GO:0006413(translational initiation);GO:0016282(eukaryotic 43S preinitiation complex);GO:0043024(ribosomal small subunit binding)	03013(RNA transport)	K03113	NA
1	ENSDARG00000092873	zgc:193541	1.93509	1.59386	0.279881	0.556	0.561	4.977e-99	1.37923e-94	zgc:193541 [Source:ZFIN;Acc:ZDB-GENE-081022-15]	GO:0003674(molecular_function);GO:0005739(mitochondrion);GO:0008150(biological_process);GO:0016020(membrane);GO:0016021(integral component of membrane)	NA	K18193	NA
1	ENSDARG00000104225	ndel1b	1.90757	1.42635	0.419406	0.505	0.445	2.88574e-97	7.99696e-93	nudE neurodevelopment protein 1-like 1b [Source:ZFIN;Acc:ZDB-GENE-030131-5889]	GO:0000132(establishment of mitotic spindle orientation);GO:0000776(kinetochore);GO:0005737(cytoplasm);GO:0005813(centrosome);GO:0005815(microtubule organizing center);GO:0005819(spindle);GO:0005856(cytoskeleton);GO:0005871(kinesin complex);GO:0005874(microtubule);GO:0007020(microtubule nucleation);GO:0007059(chromosome segregation);GO:0007100(mitotic centrosome separation);GO:0007399(nervous sys…	NA	K16739	NA
1	ENSDARG00000052073	blcap	1.1998	0.970372	0.306183	0.407	0.376	1.13507e-96	3.14552e-92	bladder cancer associated protein [Source:ZFIN;Acc:ZDB-GENE-000330-7]	GO:0003674(molecular_function);GO:0016020(membrane);GO:0016021(integral component of membrane)	NA	NA	NA
1	ENSDARG00000098312	scarb2a	3.39676	2.54079	0.418883	0.645	0.614	2.22558e-96	6.16752e-92	scavenger receptor class B, member 2a [Source:ZFIN;Acc:ZDB-GENE-020419-29]	GO:0005044(scavenger receptor activity);GO:0005764(lysosome);GO:0006898(receptor-mediated endocytosis);GO:0016020(membrane);GO:0016021(integral component of membrane);GO:0030903(notochord development)	04142(Lysosome)	K12384	NA
1	ENSDARG00000077975	si:ch73-343l4.8	9.62852	6.84193	0.49291	0.891	0.813	2.45279e-94	6.79717e-90	si:ch73-343l4.8 [Source:ZFIN;Acc:ZDB-GENE-090313-159]	GO:0016020(membrane);GO:0016021(integral component of membrane);GO:0030246(carbohydrate binding)	NA	NA	NA
1	ENSDARG00000095897	atp5f1e	3.18319	2.52265	0.335536	0.722	0.696	3.98976e-94	1.10564e-89	ATP synthase F1 subunit epsilon [Source:ZFIN;Acc:ZDB-GENE-110411-22]	GO:0000275(mitochondrial proton-transporting ATP synthase complex, catalytic core F(1));GO:0005743(mitochondrial inner membrane);GO:0015986(ATP synthesis coupled proton transport);GO:0016887(ATPase activity);GO:0046933(proton-transporting ATP synthase activity, rotational mechanism);GO:0099132(ATP hydrolysis coupled cation transmembrane transport)	00190(Oxidative phosphorylation)	K02135	NA
1	ENSDARG00000026611	socs3b	2.43639	1.74091	0.484901	0.543	0.457	7.20269e-94	1.99601e-89	suppressor of cytokine signaling 3b [Source:ZFIN;Acc:ZDB-GENE-040426-2528]	GO:0007259(receptor signaling pathway via JAK-STAT);GO:0016567(protein ubiquitination);GO:0035556(intracellular signal transduction);GO:0043066(negative regulation of apoptotic process)	04120(Ubiquitin mediated proteolysis);04910(Insulin signaling pathway);04920(Adipocytokine signaling pathway);05168(Herpes simplex virus 1 infection)	K04696	NA
1	ENSDARG00000040284	si:dkey-79d12.5	5.5634	4.39861	0.33892	0.837	0.816	1.07014e-93	2.96558e-89	si:dkey-79d12.5 [Source:ZFIN;Acc:ZDB-GENE-131127-429]	GO:0005634(nucleus);GO:0005737(cytoplasm);GO:0008285(negative regulation of cell population proliferation);GO:0045930(negative regulation of mitotic cell cycle)	03018(RNA degradation)	K14443	NA
1	ENSDARG00000037891	mlx	4.36828	3.20278	0.447739	0.725	0.706	1.09366e-93	3.03074e-89	MLX, MAX dimerization protein [Source:ZFIN;Acc:ZDB-GENE-050522-316]	GO:0003700(DNA-binding transcription factor activity);GO:0005634(nucleus);GO:0006355(regulation of transcription, DNA-templated);GO:0006357(regulation of transcription by RNA polymerase II);GO:0008134(transcription factor binding);GO:0046983(protein dimerization activity)	NA	K09113	NA
1	ENSDARG00000021113	ptmaa	14.0962	10.3315	0.448248	0.968	0.947	1.17464e-93	3.25516e-89	prothymosin alpha a [Source:ZFIN;Acc:ZDB-GENE-030131-7647]	NA	NA	K13784	NA
1	ENSDARG00000074501	tnip2	3.61907	2.64655	0.451508	0.676	0.61	1.32543e-93	3.67303e-89	TNFAIP3 interacting protein 2 [Source:ZFIN;Acc:ZDB-GENE-120913-2]	GO:0070530(K63-linked polyubiquitin modification-dependent protein binding)	NA	NA	NA
1	ENSDARG00000036967	smox	7.0031	5.08121	0.462823	0.85	0.809	3.40146e-93	9.42612e-89	spermine oxidase [Source:ZFIN;Acc:ZDB-GENE-031201-3]	GO:0016491(oxidoreductase activity);GO:0030097(hemopoiesis);GO:0046208(spermine catabolic process);GO:0046592(polyamine oxidase activity);GO:0055114(oxidation-reduction process)	00330(Arginine and proline metabolism);00410(beta-Alanine metabolism)	K12259	1.5.3.-;EC:1.5.3.16
1	ENSDARG00000039034	marcksl1a	5.85138	3.82571	0.61305	0.686	0.556	3.8751e-93	1.07387e-88	MARCKS-like 1a [Source:ZFIN;Acc:ZDB-GENE-040426-2146]	GO:0003407(neural retina development);GO:0005516(calmodulin binding);GO:0005737(cytoplasm);GO:0005856(cytoskeleton);GO:0005886(plasma membrane);GO:0007417(central nervous system development);GO:0016020(membrane);GO:0051216(cartilage development)	NA	NA	NA
1	ENSDARG00000087623	BX649485.1	1.53433	0.97692	0.651292	0.337	0.192	9.34639e-93	2.59007e-88	NA	NA	NA	NA	NA
1	ENSDARG00000019881	bsg	1.89069	1.54164	0.294445	0.537	0.529	2.39309e-92	6.63174e-88	basigin [Source:ZFIN;Acc:ZDB-GENE-030131-9638]	GO:0005886(plasma membrane);GO:0007156(homophilic cell adhesion via plasma membrane adhesion molecules);GO:0007411(axon guidance);GO:0016020(membrane);GO:0016021(integral component of membrane);GO:0030424(axon);GO:0070593(dendrite self-avoidance);GO:0098632(cell-cell adhesion mediator activity)	NA	K06535	NA
1	ENSDARG00000100003	glulb	1.80505	1.38547	0.381662	0.463	0.439	3.25439e-91	9.01855e-87	glutamate-ammonia ligase (glutamine synthase) b [Source:ZFIN;Acc:ZDB-GENE-030131-8417]	GO:0000166(nucleotide binding);GO:0003824(catalytic activity);GO:0004356(glutamate-ammonia ligase activity);GO:0005524(ATP binding);GO:0006542(glutamine biosynthetic process);GO:0006807(nitrogen compound metabolic process);GO:0016874(ligase activity)	00220(Arginine biosynthesis);00250(Alanine, aspartate and glutamate metabolism);00630(Glyoxylate and dicarboxylate metabolism);00910(Nitrogen metabolism);04217(Necroptosis)	K01915	EC:6.3.1.2
1	ENSDARG00000019302	mid1ip1b	4.51301	3.30973	0.44738	0.767	0.699	9.69788e-91	2.68748e-86	MID1 interacting protein 1b [Source:ZFIN;Acc:ZDB-GENE-040426-1720]	GO:0003674(molecular_function);GO:0005634(nucleus);GO:0005737(cytoplasm);GO:0005856(cytoskeleton);GO:0005874(microtubule);GO:0008150(biological_process)	NA	NA	NA
1	ENSDARG00000026350	wasb	8.57411	6.96173	0.30054	0.926	0.911	1.16257e-90	3.2217e-86	Wiskott-Aldrich syndrome (eczema-thrombocytopenia) b [Source:ZFIN;Acc:ZDB-GENE-030131-7098]	GO:0000147(actin cortical patch assembly);GO:0003779(actin binding);GO:0005884(actin filament);GO:0006897(endocytosis);GO:0007015(actin filament organization);GO:0030048(actin filament-based movement);GO:0030479(actin cortical patch);GO:0030593(neutrophil chemotaxis);GO:0030595(leukocyte chemotaxis);GO:0048246(macrophage chemotaxis);GO:0051015(actin filament binding);GO:0051127(positive regulatio…	04144(Endocytosis);04520(Adherens junction);04530(Tight junction);04810(Regulation of actin cytoskeleton);05132(Salmonella infection)	K05747	NA
1	ENSDARG00000017294	gnai2b	1.14455	0.89049	0.362107	0.367	0.311	2.48974e-90	6.89958e-86	guanine nucleotide binding protein (G protein), alpha inhibiting activity polypeptide 2b [Source:ZFIN;Acc:ZDB-GENE-030131-5861]	GO:0000166(nucleotide binding);GO:0001664(G protein-coupled receptor binding);GO:0003924(GTPase activity);GO:0005525(GTP binding);GO:0005834(heterotrimeric G-protein complex);GO:0007165(signal transduction);GO:0007186(G protein-coupled receptor signaling pathway);GO:0007188(adenylate cyclase-modulating G protein-coupled receptor signaling pathway);GO:0019001(guanyl nucleotide binding);GO:0031683(…	04261(Adrenergic signaling in cardiomyocytes);04371(Apelin signaling pathway);04540(Gap junction);04914(Progesterone-mediated oocyte maturation);04916(Melanogenesis)	K04630	NA
1	ENSDARG00000045847	si:ch211-214j24.10	2.01106	1.67571	0.263184	0.542	0.561	3.69128e-90	1.02293e-85	si:ch211-214j24.10 [Source:ZFIN;Acc:ZDB-GENE-030131-6301]	GO:0003723(RNA binding)	NA	NA	NA
1	ENSDARG00000099624	chmp1b	3.03732	2.42621	0.324099	0.644	0.657	1.10734e-89	3.06867e-85	chromatin modifying protein 1B [Source:ZFIN;Acc:ZDB-GENE-030131-8370]	GO:0000815(ESCRT III complex);GO:0003674(molecular_function);GO:0005737(cytoplasm);GO:0005768(endosome);GO:0005771(multivesicular body);GO:0005829(cytosol);GO:0007034(vacuolar transport);GO:0015031(protein transport);GO:0016020(membrane);GO:0031902(late endosome membrane);GO:0032509(endosome transport via multivesicular body sorting pathway);GO:0045324(late endosome to vacuole transport)	04144(Endocytosis);04217(Necroptosis)	K12197	NA
1	ENSDARG00000029036	rab32a	3.07367	2.52099	0.285971	0.687	0.699	1.22667e-89	3.39934e-85	RAB32a, member RAS oncogene family [Source:ZFIN;Acc:ZDB-GENE-031006-10]	GO:0003924(GTPase activity);GO:0005525(GTP binding);GO:0005739(mitochondrion);GO:0005794(Golgi apparatus);GO:0005802(trans-Golgi network);GO:0006886(intracellular protein transport);GO:0016192(vesicle-mediated transport);GO:0031982(vesicle);GO:0032482(Rab protein signal transduction);GO:0042470(melanosome);GO:0060036(notochord cell vacuolation)	NA	K07918	NA
1	ENSDARG00000096359	eppk1	1.21643	0.770852	0.658123	0.251	0.114	6.05997e-89	1.67934e-84	epiplakin 1 [Source:ZFIN;Acc:ZDB-GENE-030416-1]	GO:0005198(structural molecule activity);GO:0005737(cytoplasm);GO:0005856(cytoskeleton);GO:0005882(intermediate filament);GO:0007010(cytoskeleton organization);GO:0008092(cytoskeletal protein binding);GO:0016020(membrane);GO:0042060(wound healing);GO:0045095(keratin filament);GO:0045104(intermediate filament cytoskeleton organization);GO:0045110(intermediate filament bundle assembly);GO:1990254(k…	NA	NA	NA
1	ENSDARG00000069175	vps4b	1.67438	1.32046	0.342587	0.499	0.455	1.28885e-88	3.57167e-84	vacuolar protein sorting 4b homolog B (S. cerevisiae) [Source:ZFIN;Acc:ZDB-GENE-040426-1235]	GO:0000166(nucleotide binding);GO:0005524(ATP binding);GO:0005634(nucleus);GO:0007033(vacuole organization);GO:0016887(ATPase activity);GO:0042476(odontogenesis)	04144(Endocytosis);04217(Necroptosis)	K12196	NA
1	ENSDARG00000029695	pgp	2.36941	1.88906	0.326857	0.585	0.574	7.41495e-88	2.05483e-83	phosphoglycolate phosphatase [Source:ZFIN;Acc:ZDB-GENE-030131-6240]	GO:0005737(cytoplasm);GO:0006114(glycerol biosynthetic process);GO:0006650(glycerophospholipid metabolic process);GO:0016311(dephosphorylation);GO:0016787(hydrolase activity);GO:0016791(phosphatase activity);GO:0043136(glycerol-3-phosphatase activity)	00630(Glyoxylate and dicarboxylate metabolism)	K19269	3.1.3.48;EC:3.1.3.18
1	ENSDARG00000032631	ltb4r	4.64236	3.70396	0.325789	0.809	0.79	9.35471e-87	2.59238e-82	leukotriene B4 receptor [Source:ZFIN;Acc:ZDB-GENE-070705-164]	GO:0001632(leukotriene B4 receptor activity);GO:0004930(G protein-coupled receptor activity);GO:0004966(galanin receptor activity);GO:0004974(leukotriene receptor activity);GO:0005887(integral component of plasma membrane);GO:0007165(signal transduction);GO:0007186(G protein-coupled receptor signaling pathway);GO:0007218(neuropeptide signaling pathway);GO:0008528(G protein-coupled peptide recepto…	04080(Neuroactive ligand-receptor interaction)	K04296	NA
1	ENSDARG00000087616	maptb	1.52667	1.13821	0.423624	0.444	0.342	3.9574e-86	1.09668e-81	microtubule-associated protein tau b [Source:ZFIN;Acc:ZDB-GENE-081027-2]	GO:0000226(microtubule cytoskeleton organization);GO:0005737(cytoplasm);GO:0005856(cytoskeleton);GO:0005874(microtubule);GO:0008017(microtubule binding);GO:0015631(tubulin binding);GO:0031175(neuron projection development);GO:0043005(neuron projection)	04010(MAPK signaling pathway)	K04380	NA
1	ENSDARG00000045306	slc51a	0.294463	0.23848	0.304215	0.108	0.021	9.1489e-86	2.53534e-81	solute carrier family 51, alpha subunit [Source:ZFIN;Acc:ZDB-GENE-040912-10]	GO:0016020(membrane);GO:0016021(integral component of membrane)	NA	K14360	NA
1	ENSDARG00000094673	rhoab	7.75582	6.11337	0.343311	0.923	0.906	2.65168e-84	7.34833e-80	ras homolog gene family, member Ab [Source:ZFIN;Acc:ZDB-GENE-040322-2]	GO:0000166(nucleotide binding);GO:0003924(GTPase activity);GO:0005525(GTP binding);GO:0005622(intracellular);GO:0005737(cytoplasm);GO:0005886(plasma membrane);GO:0005938(cell cortex);GO:0007015(actin filament organization);GO:0007264(small GTPase mediated signal transduction);GO:0007266(Rho protein signal transduction);GO:0008360(regulation of cell shape);GO:0016020(membrane);GO:0016055(Wnt signa…	04144(Endocytosis);04150(mTOR signaling pathway);04270(Vascular smooth muscle contraction);04310(Wnt signaling pathway);04350(TGF-beta signaling pathway);04510(Focal adhesion);04520(Adherens junction);04530(Tight junction);04621(NOD-like receptor signaling pathway);04625(C-type lectin receptor signaling pathway);04810(Regulation of actin cytoskeleton)	K04513	NA
1	ENSDARG00000040439	rsl24d1	9.70544	8.05484	0.268938	0.958	0.905	4.76363e-84	1.3201e-79	ribosomal L24 domain containing 1 [Source:ZFIN;Acc:ZDB-GENE-040426-1925]	GO:0000027(ribosomal large subunit assembly);GO:0003723(RNA binding);GO:0003735(structural constituent of ribosome);GO:0005634(nucleus);GO:0005730(nucleolus);GO:0006412(translation);GO:0022625(cytosolic large ribosomal subunit);GO:0042254(ribosome biogenesis);GO:1902626(assembly of large subunit precursor of preribosome)	03010(Ribosome)	K02896	NA
1	ENSDARG00000104066	dnaja2a	3.04186	2.46986	0.300523	0.699	0.694	3.23798e-83	8.9731e-79	DnaJ heat shock protein family (Hsp40) member A2a [Source:ZFIN;Acc:ZDB-GENE-040426-2884]	GO:0005524(ATP binding);GO:0005829(cytosol);GO:0006457(protein folding);GO:0009408(response to heat);GO:0031072(heat shock protein binding);GO:0046872(metal ion binding);GO:0051082(unfolded protein binding)	04141(Protein processing in endoplasmic reticulum)	K09503	NA
1	ENSDARG00000028957	maff	2.36758	1.82002	0.379461	0.548	0.518	8.16839e-83	2.26363e-78	v-maf avian musculoaponeurotic fibrosarcoma oncogene homolog F [Source:ZFIN;Acc:ZDB-GENE-040426-1280]	GO:0000978(RNA polymerase II proximal promoter sequence-specific DNA binding);GO:0003677(DNA binding);GO:0003700(DNA-binding transcription factor activity);GO:0005634(nucleus);GO:0005667(transcription factor complex);GO:0006355(regulation of transcription, DNA-templated);GO:0043565(sequence-specific DNA binding);GO:0045604(regulation of epidermal cell differentiation);GO:0045893(positive regulati…	NA	NA	NA
1	ENSDARG00000056410	fdx1	0.949373	0.755967	0.328651	0.281	0.266	1.61736e-82	4.48204e-78	ferredoxin 1 [Source:ZFIN;Acc:ZDB-GENE-071015-2]	GO:0005575(cellular_component);GO:0009055(electron transfer activity);GO:0022900(electron transport chain);GO:0051536(iron-sulfur cluster binding);GO:0051537(2 iron, 2 sulfur cluster binding);GO:1904087(negative regulation of epiboly involved in gastrulation with mouth forming second)	NA	K22070	NA
1	ENSDARG00000101626	arf6a	1.40293	1.1432	0.295364	0.458	0.428	2.6149e-82	7.24641e-78	ADP-ribosylation factor 6a [Source:ZFIN;Acc:ZDB-GENE-030131-8007]	GO:0000166(nucleotide binding);GO:0001726(ruffle);GO:0005525(GTP binding);GO:0005737(cytoplasm);GO:0005768(endosome);GO:0006886(intracellular protein transport);GO:0016192(vesicle-mediated transport);GO:0030139(endocytic vesicle);GO:0035622(intrahepatic bile duct development);GO:0036010(protein localization to endosome);GO:0055038(recycling endosome membrane);GO:0055113(epiboly involved in gastru…	04144(Endocytosis)	K07941	NA
1	ENSDARG00000037861	slc2a3b	6.59138	5.09698	0.370938	0.847	0.823	6.11387e-82	1.69428e-77	solute carrier family 2 (facilitated glucose transporter), member 3b [Source:ZFIN;Acc:ZDB-GENE-121031-5]	GO:0005215(transporter activity);GO:0016020(membrane);GO:0016021(integral component of membrane);GO:0022857(transmembrane transporter activity);GO:0055085(transmembrane transport)	NA	NA	NA
1	ENSDARG00000044694	fybb	5.62912	4.4111	0.351771	0.864	0.821	5.19381e-81	1.43931e-76	FYN binding protein b [Source:ZFIN;Acc:ZDB-GENE-091204-85]	GO:0005515(protein binding);GO:0005886(plasma membrane);GO:0006955(immune response);GO:0007229(integrin-mediated signaling pathway);GO:0015629(actin cytoskeleton);GO:0050852(T cell receptor signaling pathway);GO:0072659(protein localization to plasma membrane)	NA	NA	NA
1	ENSDARG00000057053	zgc:91976	2.7697	2.2214	0.318256	0.622	0.617	3.83662e-80	1.06321e-75	zgc:91976 [Source:ZFIN;Acc:ZDB-GENE-041114-201]	GO:0005515(protein binding);GO:0005887(integral component of plasma membrane);GO:0006686(sphingomyelin biosynthetic process);GO:0016020(membrane);GO:0016021(integral component of membrane);GO:0030148(sphingolipid biosynthetic process);GO:0030173(integral component of Golgi membrane);GO:0030176(integral component of endoplasmic reticulum membrane);GO:0033188(sphingomyelin synthase activity);GO:004…	NA	NA	NA
1	ENSDARG00000020573	ddx3xa	2.79715	2.20933	0.340348	0.632	0.614	4.12923e-80	1.14429e-75	DEAD-box helicase 3 X-linked a [Source:ZFIN;Acc:ZDB-GENE-030131-1565]	GO:0000166(nucleotide binding);GO:0003676(nucleic acid binding);GO:0004386(helicase activity);GO:0005524(ATP binding);GO:0016787(hydrolase activity)	04622(RIG-I-like receptor signaling pathway)	K11594	EC:3.6.4.13
1	ENSDARG00000020645	slc7a3a	6.66592	4.80956	0.4709	0.797	0.747	4.55613e-80	1.26259e-75	solute carrier family 7 (cationic amino acid transporter, y+ system), member 3a [Source:ZFIN;Acc:ZDB-GENE-041114-206]	GO:0000064(L-ornithine transmembrane transporter activity);GO:0006631(fatty acid metabolic process);GO:0006641(triglyceride metabolic process);GO:0006865(amino acid transport);GO:0015181(arginine transmembrane transporter activity);GO:0015189(L-lysine transmembrane transporter activity);GO:0016020(membrane);GO:0016021(integral component of membrane);GO:0022857(transmembrane transporter activity);…	NA	K13865	NA
1	ENSDARG00000031317	ppdpfb	1.58058	1.26387	0.322603	0.436	0.421	2.2741e-79	6.30198e-75	pancreatic progenitor cell differentiation and proliferation factor b [Source:ZFIN;Acc:ZDB-GENE-030131-8247]	GO:0001708(cell fate specification);GO:0007275(multicellular organism development);GO:0030154(cell differentiation);GO:0031017(exocrine pancreas development)	NA	NA	NA
1	ENSDARG00000075870	triobpa	2.78457	2.30704	0.271409	0.646	0.628	1.72183e-78	4.77154e-74	TRIO and F-actin binding protein a [Source:ZFIN;Acc:ZDB-GENE-110411-40]	GO:0032956(regulation of actin cytoskeleton organization);GO:0051015(actin filament binding)	NA	NA	NA
1	ENSDARG00000057708	zgc:175264	1.86725	1.54455	0.273726	0.531	0.525	1.4456e-77	4.00606e-73	zgc:175264 [Source:ZFIN;Acc:ZDB-GENE-080204-123]	GO:0003674(molecular_function);GO:0008150(biological_process);GO:0016020(membrane);GO:0016021(integral component of membrane)	NA	NA	NA
1	ENSDARG00000052928	arf6b	1.4909	1.23027	0.277211	0.452	0.437	5.00356e-77	1.38659e-72	ADP-ribosylation factor 6b [Source:ZFIN;Acc:ZDB-GENE-030131-9056]	GO:0000166(nucleotide binding);GO:0001726(ruffle);GO:0005525(GTP binding);GO:0005737(cytoplasm);GO:0005768(endosome);GO:0006886(intracellular protein transport);GO:0016192(vesicle-mediated transport);GO:0030139(endocytic vesicle);GO:0035622(intrahepatic bile duct development);GO:0036010(protein localization to endosome);GO:0055038(recycling endosome membrane);GO:0055113(epiboly involved in gastru…	04144(Endocytosis)	K07941	NA
1	ENSDARG00000070922	cnbpb	1.66026	1.37613	0.270796	0.476	0.478	5.67209e-77	1.57185e-72	CCHC-type zinc finger, nucleic acid binding protein b [Source:ZFIN;Acc:ZDB-GENE-030131-7782]	GO:0003676(nucleic acid binding);GO:0008270(zinc ion binding)	NA	K09250	NA
1	ENSDARG00000067916	lyn	1.84124	1.45085	0.343773	0.483	0.435	1.65373e-76	4.58281e-72	LYN proto-oncogene, Src family tyrosine kinase [Source:ZFIN;Acc:ZDB-GENE-040912-7]	GO:0000166(nucleotide binding);GO:0004672(protein kinase activity);GO:0004713(protein tyrosine kinase activity);GO:0004715(non-membrane spanning protein tyrosine kinase activity);GO:0005102(signaling receptor binding);GO:0005515(protein binding);GO:0005524(ATP binding);GO:0006468(protein phosphorylation);GO:0007169(transmembrane receptor protein tyrosine kinase signaling pathway);GO:0009611(respo…	NA	K05854	EC:2.7.10.2
1	ENSDARG00000053370	eif3jb	1.09466	0.900723	0.281333	0.332	0.326	2.22467e-76	6.165e-72	eukaryotic translation initiation factor 3, subunit Jb [Source:ZFIN;Acc:ZDB-GENE-040426-2900]	GO:0001732(formation of cytoplasmic translation initiation complex);GO:0002183(cytoplasmic translational initiation);GO:0003743(translation initiation factor activity);GO:0005737(cytoplasm);GO:0005852(eukaryotic translation initiation factor 3 complex);GO:0006412(translation);GO:0006413(translational initiation);GO:0016282(eukaryotic 43S preinitiation complex);GO:0033290(eukaryotic 48S preinitiat…	03013(RNA transport)	K03245	NA
1	ENSDARG00000054058	h1fx	10.2663	6.91375	0.570375	0.708	0.635	2.60608e-76	7.22196e-72	H1 histone family, member X [Source:ZFIN;Acc:ZDB-GENE-030131-1228]	GO:0000786(nucleosome);GO:0003677(DNA binding);GO:0003690(double-stranded DNA binding);GO:0005515(protein binding);GO:0005634(nucleus);GO:0005694(chromosome);GO:0005730(nucleolus);GO:0006334(nucleosome assembly);GO:0006355(regulation of transcription, DNA-templated);GO:0016584(nucleosome positioning);GO:0030261(chromosome condensation);GO:0031492(nucleosomal DNA binding);GO:0031936(negative regul…	NA	K11275	NA
1	ENSDARG00000002791	atp1a1a.1	2.86054	2.3181	0.303347	0.644	0.626	3.34154e-76	9.26008e-72	ATPase Na+/K+ transporting subunit alpha 1a, tandem duplicate 1 [Source:ZFIN;Acc:ZDB-GENE-001212-1]	GO:0000166(nucleotide binding);GO:0002027(regulation of heart rate);GO:0003143(embryonic heart tube morphogenesis);GO:0005391(sodium:potassium-exchanging ATPase activity);GO:0005524(ATP binding);GO:0005887(integral component of plasma membrane);GO:0006811(ion transport);GO:0006813(potassium ion transport);GO:0006883(cellular sodium ion homeostasis);GO:0007368(determination of left/right symmetry)…	04260(Cardiac muscle contraction);04261(Adrenergic signaling in cardiomyocytes)	K01539	EC:7.2.2.13
1	ENSDARG00000010246	prmt1	0.787609	0.636059	0.308319	0.276	0.226	4.90564e-76	1.35945e-71	protein arginine methyltransferase 1 [Source:ZFIN;Acc:ZDB-GENE-030131-693]	GO:0005634(nucleus);GO:0005829(cytosol);GO:0006355(regulation of transcription, DNA-templated);GO:0006479(protein methylation);GO:0008168(methyltransferase activity);GO:0008469(histone-arginine N-methyltransferase activity);GO:0008757(S-adenosylmethionine-dependent methyltransferase activity);GO:0016273(arginine N-methyltransferase activity);GO:0016740(transferase activity);GO:0019919(peptidyl-ar…	04068(FoxO signaling pathway)	K11434	EC:2.1.1.319
1	ENSDARG00000097901	si:ch73-90p23.1	2.06679	1.43869	0.522633	0.473	0.339	8.53622e-76	2.36556e-71	si:ch73-90p23.1 [Source:ZFIN;Acc:ZDB-GENE-131121-421]	GO:0004930(G protein-coupled receptor activity);GO:0007186(G protein-coupled receptor signaling pathway);GO:0016020(membrane);GO:0016021(integral component of membrane)	NA	K04328	NA
1	ENSDARG00000103207	rab11fip4b	2.68083	2.15567	0.314545	0.604	0.602	1.05502e-75	2.92368e-71	RAB11 family interacting protein 4 (class II) b [Source:ZFIN;Acc:ZDB-GENE-080722-8]	GO:0005768(endosome);GO:0005813(centrosome);GO:0007049(cell cycle);GO:0016020(membrane);GO:0017137(Rab GTPase binding);GO:0030139(endocytic vesicle);GO:0030306(ADP-ribosylation factor binding);GO:0030496(midbody);GO:0031410(cytoplasmic vesicle);GO:0032154(cleavage furrow);GO:0032456(endocytic recycling);GO:0032465(regulation of cytokinesis);GO:0042803(protein homodimerization activity);GO:0051301…	04144(Endocytosis)	K12485	NA
1	ENSDARG00000035198	gcnt4a	1.43177	1.10549	0.373106	0.353	0.35	1.07274e-75	2.97277e-71	glucosaminyl (N-acetyl) transferase 4a [Source:ZFIN;Acc:ZDB-GENE-030131-3231]	GO:0000139(Golgi membrane);GO:0003829(beta-1,3-galactosyl-O-glycosyl-glycoprotein beta-1,6-N-acetylglucosaminyltransferase activity);GO:0005794(Golgi apparatus);GO:0006486(protein glycosylation);GO:0008375(acetylglucosaminyltransferase activity);GO:0016020(membrane);GO:0016021(integral component of membrane);GO:0016740(transferase activity);GO:0016757(transferase activity, transferring glycosyl g…	00512(Mucin type O-glycan biosynthesis)	K09663	EC:2.4.1.-
1	ENSDARG00000100442	cfh	1.28581	1.0066	0.353191	0.368	0.329	1.46873e-75	4.07015e-71	complement factor H [Source:ZFIN;Acc:ZDB-GENE-050208-661]	GO:0003674(molecular_function);GO:0005575(cellular_component);GO:0008150(biological_process)	NA	NA	NA
1	ENSDARG00000017741	g3bp1	2.05626	1.60793	0.354822	0.507	0.48	4.86988e-75	1.34954e-70	GTPase activating protein (SH3 domain) binding protein 1 [Source:ZFIN;Acc:ZDB-GENE-030131-7452]	GO:0003676(nucleic acid binding);GO:0003723(RNA binding);GO:0003729(mRNA binding);GO:0005829(cytosol);GO:1990904(ribonucleoprotein complex)	NA	K17265	3.6.4.13;EC:3.6.4.12
1	ENSDARG00000098443	zfand6	3.75333	3.00204	0.322229	0.728	0.717	4.23997e-74	1.17498e-69	zinc finger, AN1-type domain 6 [Source:ZFIN;Acc:ZDB-GENE-030131-8405]	GO:0003677(DNA binding);GO:0005575(cellular_component);GO:0008270(zinc ion binding);GO:0046872(metal ion binding)	NA	NA	NA
1	ENSDARG00000054823	id3	5.91501	4.48386	0.399641	0.755	0.762	6.01608e-74	1.66718e-69	inhibitor of DNA binding 3 [Source:ZFIN;Acc:ZDB-GENE-020515-1]	GO:0001085(RNA polymerase II transcription factor binding);GO:0003700(DNA-binding transcription factor activity);GO:0005634(nucleus);GO:0005737(cytoplasm);GO:0007623(circadian rhythm);GO:0008134(transcription factor binding);GO:0030182(neuron differentiation);GO:0043392(negative regulation of DNA binding);GO:0045665(negative regulation of neuron differentiation);GO:0045892(negative regulation of …	04350(TGF-beta signaling pathway)	K17694	NA
1	ENSDARG00000046106	rab10	1.81826	1.51808	0.260317	0.531	0.525	6.47318e-74	1.79385e-69	RAB10, member RAS oncogene family [Source:ZFIN;Acc:ZDB-GENE-040718-304]	GO:0003924(GTPase activity);GO:0005525(GTP binding);GO:0005768(endosome);GO:0005794(Golgi apparatus);GO:0005886(plasma membrane);GO:0006886(intracellular protein transport);GO:0006904(vesicle docking involved in exocytosis);GO:0008021(synaptic vesicle);GO:0009306(protein secretion);GO:0017157(regulation of exocytosis);GO:0032482(Rab protein signal transduction);GO:0032593(insulin-responsive compa…	04144(Endocytosis)	K07903	NA
1	ENSDARG00000099774	cyb5b	1.66197	1.35062	0.299277	0.478	0.449	2.02292e-73	5.6059e-69	cytochrome b5 type B [Source:ZFIN;Acc:ZDB-GENE-040426-2614]	GO:0016020(membrane);GO:0016021(integral component of membrane);GO:0020037(heme binding);GO:0046872(metal ion binding)	NA	NA	NA
1	ENSDARG00000077308	gpr84	12.1139	9.55512	0.342312	0.922	0.883	2.58068e-73	7.15158e-69	G protein-coupled receptor 84 [Source:ZFIN;Acc:ZDB-GENE-070928-33]	GO:0001604(urotensin II receptor activity);GO:0004930(G protein-coupled receptor activity);GO:0005887(integral component of plasma membrane);GO:0007186(G protein-coupled receptor signaling pathway);GO:0007218(neuropeptide signaling pathway);GO:0008528(G protein-coupled peptide receptor activity);GO:0016020(membrane);GO:0016021(integral component of membrane);GO:0032496(response to lipopolysacchar…	NA	K08421	NA
1	ENSDARG00000092870	BX936337.1	2.29134	1.74998	0.388848	0.547	0.49	2.01092e-72	5.57267e-68	NA	NA	NA	NA	NA
1	ENSDARG00000099932	BX005245.1	0.443861	0.336094	0.401241	0.126	0.044	3.81431e-72	1.05702e-67	NA	NA	NA	NA	NA
1	ENSDARG00000040623	fosl2	2.73973	2.09213	0.389062	0.591	0.541	6.73659e-72	1.86685e-67	fos-like antigen 2 [Source:ZFIN;Acc:ZDB-GENE-070209-164]	GO:0000978(RNA polymerase II proximal promoter sequence-specific DNA binding);GO:0003677(DNA binding);GO:0003700(DNA-binding transcription factor activity);GO:0005634(nucleus);GO:0006355(regulation of transcription, DNA-templated);GO:0006357(regulation of transcription by RNA polymerase II);GO:2000690(regulation of cardiac muscle cell myoblast differentiation)	NA	K09030	NA
1	ENSDARG00000074782	adgrg3	4.51157	3.54492	0.347874	0.743	0.719	7.59352e-72	2.10432e-67	adhesion G protein-coupled receptor G3 [Source:ZFIN;Acc:ZDB-GENE-140106-110]	GO:0004888(transmembrane signaling receptor activity);GO:0004930(G protein-coupled receptor activity);GO:0005887(integral component of plasma membrane);GO:0007166(cell surface receptor signaling pathway);GO:0007186(G protein-coupled receptor signaling pathway);GO:0007189(adenylate cyclase-activating G protein-coupled receptor signaling pathway);GO:0016020(membrane);GO:0016021(integral component o…	NA	K08452	NA
1	ENSDARG00000021833	ahr2	2.0355	1.63781	0.313617	0.508	0.48	8.07255e-72	2.23707e-67	aryl hydrocarbon receptor 2 [Source:ZFIN;Acc:ZDB-GENE-990714-16]	GO:0000981(DNA-binding transcription factor activity, RNA polymerase II-specific);GO:0001541(ovarian follicle development);GO:0003677(DNA binding);GO:0004879(nuclear receptor activity);GO:0005515(protein binding);GO:0005634(nucleus);GO:0005737(cytoplasm);GO:0006355(regulation of transcription, DNA-templated);GO:0006357(regulation of transcription by RNA polymerase II);GO:0006805(xenobiotic metabo…	NA	NA	NA
1	ENSDARG00000087732	RF00017	1.53034	1.15184	0.409911	0.393	0.31	9.87466e-72	2.73647e-67	NA	NA	NA	NA	NA
1	ENSDARG00000054191	pgk1	3.41376	2.84224	0.264333	0.725	0.735	1.51897e-71	4.20937e-67	phosphoglycerate kinase 1 [Source:ZFIN;Acc:ZDB-GENE-040426-2711]	GO:0001666(response to hypoxia);GO:0004618(phosphoglycerate kinase activity);GO:0005524(ATP binding);GO:0005829(cytosol);GO:0006094(gluconeogenesis);GO:0006096(glycolytic process);GO:0016301(kinase activity);GO:0016310(phosphorylation);GO:0016740(transferase activity);GO:0043531(ADP binding);GO:1903862(positive regulation of oxidative phosphorylation)	00010(Glycolysis / Gluconeogenesis)	K00927	EC:2.7.2.3
1	ENSDARG00000016255	chmp4ba	3.46321	2.70586	0.356026	0.654	0.626	2.01198e-71	5.57559e-67	charged multivesicular body protein 4Ba [Source:ZFIN;Acc:ZDB-GENE-040426-906]	GO:0007034(vacuolar transport)	04144(Endocytosis);04217(Necroptosis)	K12194	NA
1	ENSDARG00000098853	ehd1a	3.69404	2.85904	0.369672	0.708	0.639	3.0578e-71	8.47378e-67	EH-domain containing 1a [Source:ZFIN;Acc:ZDB-GENE-040426-2518]	GO:0005509(calcium ion binding);GO:0005515(protein binding);GO:0005525(GTP binding);GO:0005575(cellular_component);GO:0005623(cell);GO:0032456(endocytic recycling);GO:0060271(cilium assembly)	04144(Endocytosis)	K12483	NA
1	ENSDARG00000089404	si:dkey-24p1.7	1.32634	1.0141	0.387262	0.373	0.298	1.67956e-70	4.65439e-66	si:dkey-24p1.7 [Source:ZFIN;Acc:ZDB-GENE-121214-215]	GO:0016020(membrane);GO:0016021(integral component of membrane)	NA	NA	NA
1	ENSDARG00000058044	rab1ba	1.03169	0.854676	0.27156	0.355	0.31	1.93901e-69	5.37337e-65	zRAB1B, member RAS oncogene family a [Source:ZFIN;Acc:ZDB-GENE-040426-873]	GO:0000139(Golgi membrane);GO:0003924(GTPase activity);GO:0005525(GTP binding);GO:0006886(intracellular protein transport);GO:0032482(Rab protein signal transduction)	NA	K07874	NA
1	ENSDARG00000008075	illr4	7.60696	6.17589	0.300672	0.907	0.816	2.45299e-69	6.79771e-65	immune-related, lectin-like receptor 4 [Source:ZFIN;Acc:ZDB-GENE-050311-5]	GO:0016020(membrane);GO:0016021(integral component of membrane);GO:0030246(carbohydrate binding)	NA	K10064	NA
1	ENSDARG00000056499	ca6	1.91927	1.40989	0.444978	0.466	0.324	3.88528e-69	1.07669e-64	carbonic anhydrase VI [Source:ZFIN;Acc:ZDB-GENE-030131-7091]	GO:0004089(carbonate dehydratase activity);GO:0006730(one-carbon metabolic process);GO:0008270(zinc ion binding);GO:0009986(cell surface);GO:0036269(swimming behavior);GO:0046872(metal ion binding)	00910(Nitrogen metabolism)	K01672	EC:4.2.1.1
1	ENSDARG00000015164	mknk2b	1.60796	1.2969	0.310164	0.424	0.406	4.76866e-69	1.32149e-64	MAP kinase interacting serine/threonine kinase 2b [Source:ZFIN;Acc:ZDB-GENE-030829-2]	GO:0000166(nucleotide binding);GO:0004672(protein kinase activity);GO:0004674(protein serine/threonine kinase activity);GO:0004683(calmodulin-dependent protein kinase activity);GO:0005516(calmodulin binding);GO:0005524(ATP binding);GO:0005634(nucleus);GO:0005737(cytoplasm);GO:0006468(protein phosphorylation);GO:0009931(calcium-dependent protein serine/threonine kinase activity);GO:0018105(peptidy…	04010(MAPK signaling pathway);04910(Insulin signaling pathway)	K04372	EC:2.7.11.1
1	ENSDARG00000086753	gb:bc139872	0.823876	0.661809	0.316012	0.246	0.223	1.03825e-68	2.8772e-64	expressed sequence BC139872 [Source:ZFIN;Acc:ZDB-GENE-111013-4]	NA	NA	NA	NA
1	ENSDARG00000104782	oaz1b	4.82216	3.86662	0.318606	0.831	0.819	1.35007e-68	3.74131e-64	ornithine decarboxylase antizyme 1b [Source:ZFIN;Acc:ZDB-GENE-020731-5]	GO:0005829(cytosol);GO:0006595(polyamine metabolic process);GO:0008073(ornithine decarboxylase inhibitor activity);GO:0043086(negative regulation of catalytic activity)	NA	K16613	NA
1	ENSDARG00000099175	hmgb1a	3.27381	2.58242	0.342249	0.673	0.646	3.29167e-68	9.12187e-64	high mobility group box 1a [Source:ZFIN;Acc:ZDB-GENE-030131-341]	GO:0000790(nuclear chromatin);GO:0002218(activation of innate immune response);GO:0003677(DNA binding);GO:0005634(nucleus);GO:0005737(cytoplasm);GO:0005886(plasma membrane);GO:0006310(DNA recombination);GO:0006338(chromatin remodeling);GO:0006357(regulation of transcription by RNA polymerase II);GO:0008134(transcription factor binding);GO:0008301(DNA binding, bending);GO:0009409(response to cold)…	03410(Base excision repair);04140(Autophagy - animal);04217(Necroptosis)	K10802	NA
1	ENSDARG00000004078	acsl4a	0.714908	0.58528	0.288632	0.251	0.214	5.82697e-68	1.61477e-63	acyl-CoA synthetase long chain family member 4a [Source:ZFIN;Acc:ZDB-GENE-040426-1565]	GO:0003824(catalytic activity);GO:0009953(dorsal/ventral pattern formation);GO:0016020(membrane);GO:0016021(integral component of membrane);GO:0030513(positive regulation of BMP signaling pathway);GO:0051896(regulation of protein kinase B signaling);GO:1900744(regulation of p38MAPK cascade)	00061(Fatty acid biosynthesis);00071(Fatty acid degradation);03320(PPAR signaling pathway);04146(Peroxisome);04216(Ferroptosis);04920(Adipocytokine signaling pathway)	K01897	EC:6.2.1.3
1	ENSDARG00000030914	tmem120a	1.73486	1.34055	0.371995	0.428	0.384	6.37973e-68	1.76795e-63	transmembrane protein 120A [Source:ZFIN;Acc:ZDB-GENE-070424-21]	GO:0003674(molecular_function);GO:0005634(nucleus);GO:0005637(nuclear inner membrane);GO:0016020(membrane);GO:0016021(integral component of membrane);GO:0045444(fat cell differentiation)	NA	NA	NA
1	ENSDARG00000054578	arl6ip1	5.13755	4.25149	0.273111	0.85	0.844	1.0227e-67	2.83411e-63	ADP-ribosylation factor-like 6 interacting protein 1 [Source:ZFIN;Acc:ZDB-GENE-040426-1087]	GO:0001755(neural crest cell migration);GO:0005515(protein binding);GO:0005784(Sec61 translocon complex);GO:0006613(cotranslational protein targeting to membrane);GO:0014032(neural crest cell development);GO:0016020(membrane);GO:0016021(integral component of membrane);GO:0060042(retina morphogenesis in camera-type eye)	NA	NA	NA
1	ENSDARG00000095451	si:ch211-196l7.4	2.91896	2.30523	0.340544	0.589	0.568	2.04667e-67	5.67172e-63	si:ch211-196l7.4 [Source:ZFIN;Acc:ZDB-GENE-050419-122]	NA	NA	NA	NA
1	ENSDARG00000094965	nfil3-5	0.743722	0.546433	0.444719	0.205	0.107	2.9048e-67	8.04979e-63	nuclear factor, interleukin 3 regulated, member 5 [Source:ZFIN;Acc:ZDB-GENE-030131-7677]	GO:0003700(DNA-binding transcription factor activity);GO:0005634(nucleus);GO:0006355(regulation of transcription, DNA-templated);GO:0007623(circadian rhythm);GO:0032922(circadian regulation of gene expression)	NA	NA	NA
1	ENSDARG00000023217	crema	3.49554	2.84973	0.294689	0.702	0.692	1.05744e-66	2.93038e-62	cAMP responsive element modulator a [Source:ZFIN;Acc:ZDB-GENE-030131-7031]	GO:0003677(DNA binding);GO:0003700(DNA-binding transcription factor activity);GO:0005515(protein binding);GO:0005634(nucleus);GO:0005667(transcription factor complex);GO:0006355(regulation of transcription, DNA-templated)	04261(Adrenergic signaling in cardiomyocytes)	K09052	NA
1	ENSDARG00000104693	il6st	1.03436	0.787979	0.392504	0.309	0.229	1.47858e-66	4.09744e-62	interleukin 6 signal transducer [Source:ZFIN;Acc:ZDB-GENE-080104-6]	GO:0004896(cytokine receptor activity);GO:0004915(interleukin-6 receptor activity);GO:0004923(leukemia inhibitory factor receptor activity);GO:0004924(oncostatin-M receptor activity);GO:0005127(ciliary neurotrophic factor receptor binding);GO:0005138(interleukin-6 receptor binding);GO:0005515(protein binding);GO:0005896(interleukin-6 receptor complex);GO:0005900(oncostatin-M receptor complex);GO:…	04060(Cytokine-cytokine receptor interaction)	K05060	NA
1	ENSDARG00000023627	ggps1	1.06719	0.844655	0.337381	0.346	0.267	9.33082e-66	2.58576e-61	geranylgeranyl diphosphate synthase 1 [Source:ZFIN;Acc:ZDB-GENE-030131-8742]	GO:0008299(isoprenoid biosynthetic process);GO:0016740(transferase activity)	00900(Terpenoid backbone biosynthesis)	K00804	2.5.1.10;2.5.1.29;EC:2.5.1.1
1	ENSDARG00000039931	slc25a33	1.431	1.15091	0.314244	0.442	0.397	1.04441e-65	2.89428e-61	solute carrier family 25 (pyrimidine nucleotide carrier), member 33 [Source:ZFIN;Acc:ZDB-GENE-040426-2183]	GO:0005739(mitochondrion);GO:0005743(mitochondrial inner membrane);GO:0015218(pyrimidine nucleotide transmembrane transporter activity);GO:0016020(membrane);GO:0016021(integral component of membrane);GO:0022857(transmembrane transporter activity);GO:0055085(transmembrane transport);GO:1990519(pyrimidine nucleotide import into mitochondrion)	NA	K15116	NA
1	ENSDARG00000112943	adgre5b.3.1	1.74012	1.31398	0.405242	0.46	0.36	2.04306e-65	5.66173e-61	adhesion G protein-coupled receptor E5b, duplicate 3 [Source:ZFIN;Acc:ZDB-GENE-121214-275]	GO:0004888(transmembrane signaling receptor activity);GO:0004930(G protein-coupled receptor activity);GO:0005509(calcium ion binding);GO:0005887(integral component of plasma membrane);GO:0007166(cell surface receptor signaling pathway);GO:0007186(G protein-coupled receptor signaling pathway);GO:0007189(adenylate cyclase-activating G protein-coupled receptor signaling pathway);GO:0016020(membrane)…	NA	K08446	NA
1	ENSDARG00000099672	capgb	7.47243	6.22084	0.264468	0.926	0.905	2.28148e-65	6.32244e-61	capping protein (actin filament), gelsolin-like b [Source:ZFIN;Acc:ZDB-GENE-030131-8541]	GO:0005575(cellular_component);GO:0051015(actin filament binding);GO:0051016(barbed-end actin filament capping)	NA	K10368	NA
1	ENSDARG00000076614	ssuh2.3	1.55917	1.21006	0.365695	0.434	0.365	4.57557e-65	1.26798e-60	ssu-2 homolog, tandem duplicate 3 [Source:ZFIN;Acc:ZDB-GENE-080516-4]	GO:0005575(cellular_component);GO:0008150(biological_process)	NA	NA	NA
1	ENSDARG00000101017	CT583642.1	0.890773	0.703434	0.340643	0.291	0.221	2.57635e-64	7.13958e-60	NA	GO:0005044(scavenger receptor activity);GO:0006898(receptor-mediated endocytosis);GO:0009897(external side of plasma membrane);GO:0016020(membrane)	NA	NA	NA
1	ENSDARG00000097513	CT573383.1	2.13201	1.65333	0.36684	0.542	0.469	2.04406e-63	5.66451e-59	annexin A2-A-like [Source:NCBI gene;Acc:100006250]	NA	NA	NA	NA
1	ENSDARG00000013360	sh3gl3a	2.39057	1.93427	0.305561	0.475	0.492	1.19456e-62	3.31038e-58	SH3-domain GRB2-like 3a [Source:ZFIN;Acc:ZDB-GENE-070112-242]	GO:0005515(protein binding);GO:0005737(cytoplasm);GO:0006897(endocytosis)	04144(Endocytosis)	K11247	NA
1	ENSDARG00000056856	tax1bp1b	2.22808	1.84983	0.268412	0.529	0.52	2.64407e-62	7.32723e-58	Tax1 (human T-cell leukemia virus type I) binding protein 1b [Source:ZFIN;Acc:ZDB-GENE-030131-2872]	GO:0006915(apoptotic process);GO:0046872(metal ion binding)	04137(Mitophagy - animal)	K21347	NA
1	ENSDARG00000038064	chmp3	0.564565	0.460929	0.292596	0.207	0.148	6.43755e-62	1.78397e-57	charged multivesicular body protein 3 [Source:ZFIN;Acc:ZDB-GENE-040426-2600]	GO:0000815(ESCRT III complex);GO:0003674(molecular_function);GO:0005737(cytoplasm);GO:0005768(endosome);GO:0005771(multivesicular body);GO:0005829(cytosol);GO:0007034(vacuolar transport);GO:0015031(protein transport);GO:0016020(membrane);GO:0031902(late endosome membrane);GO:0032509(endosome transport via multivesicular body sorting pathway);GO:0045324(late endosome to vacuole transport)	04144(Endocytosis);04217(Necroptosis)	K12193	NA
1	ENSDARG00000098761	rgs2	22.7296	15.4791	0.554251	0.904	0.873	7.59167e-61	2.1038e-56	regulator of G protein signaling 2 [Source:ZFIN;Acc:ZDB-GENE-040718-410]	GO:0005096(GTPase activator activity);GO:0007186(G protein-coupled receptor signaling pathway);GO:0014032(neural crest cell development);GO:0043547(positive regulation of GTPase activity);GO:0090301(negative regulation of neural crest formation)	NA	K16449	NA
1	ENSDARG00000003017	ube2al	3.19341	2.58291	0.306097	0.633	0.615	1.24171e-60	3.44102e-56	ubiquitin conjugating enzyme E2 A, like [Source:ZFIN;Acc:ZDB-GENE-030131-4195]	GO:0000166(nucleotide binding);GO:0000209(protein polyubiquitination);GO:0000790(nuclear chromatin);GO:0005524(ATP binding);GO:0006281(DNA repair);GO:0016740(transferase activity);GO:0033503(HULC complex);GO:0043161(proteasome-mediated ubiquitin-dependent protein catabolic process);GO:0061631(ubiquitin conjugating enzyme activity)	04120(Ubiquitin mediated proteolysis)	K10573	EC:2.3.2.23
1	ENSDARG00000098700	il1b	66.1042	50.6787	0.383361	0.989	0.987	2.25922e-60	6.26076e-56	interleukin 1, beta [Source:ZFIN;Acc:ZDB-GENE-040702-2]	GO:0002237(response to molecule of bacterial origin);GO:0005125(cytokine activity);GO:0005149(interleukin-1 receptor binding);GO:0005576(extracellular region);GO:0005615(extracellular space);GO:0006954(inflammatory response);GO:0006955(immune response);GO:0009615(response to virus);GO:0009617(response to bacterium);GO:0010469(regulation of signaling receptor activity);GO:0030593(neutrophil chemot…	04010(MAPK signaling pathway);04060(Cytokine-cytokine receptor interaction);04217(Necroptosis);04620(Toll-like receptor signaling pathway);04621(NOD-like receptor signaling pathway);04623(Cytosolic DNA-sensing pathway);04625(C-type lectin receptor signaling pathway);04933(AGE-RAGE signaling pathway in diabetic complications);05132(Salmonella infection);05168(Herpes simplex virus 1 infection)	K04519	NA
1	ENSDARG00000090512	trim8a	0.713573	0.581319	0.295731	0.246	0.183	3.90264e-60	1.0815e-55	tripartite motif containing 8a [Source:ZFIN;Acc:ZDB-GENE-130107-1]	GO:0005634(nucleus)	NA	K12001	EC:2.3.2.27
1	ENSDARG00000002369	UBB	3.78479	3.15181	0.264034	0.696	0.709	4.61226e-60	1.27815e-55	si:ch211-202a12.4 [Source:ZFIN;Acc:ZDB-GENE-030131-8486]	GO:0005515(protein binding);GO:0005634(nucleus);GO:0005737(cytoplasm);GO:0016567(protein ubiquitination);GO:0019941(modification-dependent protein catabolic process);GO:0031386(protein tag);GO:0031625(ubiquitin protein ligase binding)	NA	NA	NA
1	ENSDARG00000105273	FP074902.2	1.77125	1.44147	0.29723	0.459	0.419	1.36484e-59	3.78226e-55	si:ch73-295i22.2 [Source:NCBI gene;Acc:100538042]	NA	NA	NA	NA
1	ENSDARG00000035622	xbp1	11.9387	9.46984	0.334232	0.95	0.921	3.52597e-59	9.77116e-55	X-box binding protein 1 [Source:ZFIN;Acc:ZDB-GENE-011210-2]	GO:0000977(RNA polymerase II regulatory region sequence-specific DNA binding);GO:0000981(DNA-binding transcription factor activity, RNA polymerase II-specific);GO:0001889(liver development);GO:0003700(DNA-binding transcription factor activity);GO:0005634(nucleus);GO:0006355(regulation of transcription, DNA-templated);GO:0006366(transcription by RNA polymerase II);GO:0006990(positive regulation of…	04141(Protein processing in endoplasmic reticulum)	K09027	NA
1	ENSDARG00000105530	si:dkey-19b23.14	10.2226	8.12148	0.331943	0.938	0.913	6.17993e-59	1.71258e-54	si:dkey-19b23.14 [Source:ZFIN;Acc:ZDB-GENE-160728-109]	GO:0016020(membrane);GO:0016021(integral component of membrane)	NA	NA	NA
1	ENSDARG00000052088	cxcr1	4.72618	3.24621	0.541917	0.542	0.413	1.29879e-58	3.59921e-54	chemokine (C-X-C motif) receptor 1 [Source:ZFIN;Acc:ZDB-GENE-070302-4]	GO:0004930(G protein-coupled receptor activity);GO:0006935(chemotaxis);GO:0006955(immune response);GO:0007165(signal transduction);GO:0007186(G protein-coupled receptor signaling pathway);GO:0007204(positive regulation of cytosolic calcium ion concentration);GO:0009897(external side of plasma membrane);GO:0016020(membrane);GO:0016021(integral component of membrane);GO:0016493(C-C chemokine recept…	NA	NA	NA
1	ENSDARG00000099385	CT030188.1	8.44457	6.96681	0.277526	0.945	0.899	4.88276e-58	1.35311e-53	si: ch211-223l2.4 [Source:NCBI gene;Acc:100002400]	GO:0003779(actin binding);GO:0005516(calmodulin binding);GO:0006936(muscle contraction);GO:0007165(signal transduction);GO:0017022(myosin binding)	NA	NA	NA
1	ENSDARG00000068784	vsir	14.0795	11.2302	0.326208	0.955	0.955	3.69828e-57	1.02487e-52	V-set immunoregulatory receptor [Source:ZFIN;Acc:ZDB-GENE-060929-716]	GO:0003674(molecular_function);GO:0016020(membrane);GO:0016021(integral component of membrane)	04514(Cell adhesion molecules (CAMs))	K23268	NA
1	ENSDARG00000045248	h3f3d	9.25436	7.65295	0.274117	0.949	0.943	1.03047e-56	2.85563e-52	H3 histone, family 3D [Source:ZFIN;Acc:ZDB-GENE-040426-1023]	GO:0000786(nucleosome);GO:0003677(DNA binding);GO:0005634(nucleus);GO:0005694(chromosome);GO:0031492(nucleosomal DNA binding);GO:0046982(protein heterodimerization activity)	NA	K11253	NA
1	ENSDARG00000018898	zfand5a	1.68446	1.38572	0.28165	0.466	0.424	4.88632e-56	1.3541e-51	zinc finger, AN1-type domain 5a [Source:ZFIN;Acc:ZDB-GENE-040426-1979]	GO:0003677(DNA binding);GO:0008270(zinc ion binding);GO:0046872(metal ion binding)	NA	NA	NA
1	ENSDARG00000094396	CR848841.1	3.58968	2.92693	0.294468	0.704	0.675	7.14724e-56	1.98064e-51	NA	NA	NA	NA	NA
1	ENSDARG00000007184	zbtb16a	1.23861	0.943589	0.392489	0.336	0.255	8.66004e-56	2.39987e-51	zinc finger and BTB domain containing 16a [Source:ZFIN;Acc:ZDB-GENE-030131-1989]	GO:0003676(nucleic acid binding);GO:0005515(protein binding)	NA	K10055	NA
1	ENSDARG00000044562	cycsb	3.97889	3.31716	0.262418	0.774	0.77	4.86729e-55	1.34882e-50	cytochrome c, somatic b [Source:ZFIN;Acc:ZDB-GENE-040625-38]	GO:0005739(mitochondrion);GO:0005758(mitochondrial intermembrane space);GO:0006122(mitochondrial electron transport, ubiquinol to cytochrome c);GO:0006123(mitochondrial electron transport, cytochrome c to oxygen);GO:0009055(electron transfer activity);GO:0020037(heme binding);GO:0046872(metal ion binding);GO:0055114(oxidation-reduction process);GO:0070469(respirasome)	04115(p53 signaling pathway);04210(Apoptosis);05168(Herpes simplex virus 1 infection)	K08738	NA
1	ENSDARG00000103672	cirbpa	6.4927	5.20009	0.320282	0.863	0.851	1.82267e-53	5.05097e-49	cold inducible RNA binding protein a [Source:ZFIN;Acc:ZDB-GENE-050417-329]	GO:0003676(nucleic acid binding);GO:0003723(RNA binding);GO:0003730(mRNA 3'-UTR binding);GO:0005575(cellular_component);GO:0005681(spliceosomal complex);GO:0005737(cytoplasm);GO:0008266(poly(U) RNA binding);GO:0009409(response to cold);GO:0017148(negative regulation of translation);GO:0030371(translation repressor activity);GO:0045727(positive regulation of translation);GO:0048026(positive regula…	NA	K13195	NA
1	ENSDARG00000019307	dusp5	2.27459	1.77096	0.361075	0.512	0.445	3.28294e-53	9.09769e-49	dual specificity phosphatase 5 [Source:ZFIN;Acc:ZDB-GENE-010625-1]	GO:0000188(inactivation of MAPK activity);GO:0004721(phosphoprotein phosphatase activity);GO:0004725(protein tyrosine phosphatase activity);GO:0005634(nucleus);GO:0005737(cytoplasm);GO:0006470(protein dephosphorylation);GO:0008138(protein tyrosine/serine/threonine phosphatase activity);GO:0016311(dephosphorylation);GO:0016787(hydrolase activity);GO:0016791(phosphatase activity);GO:0017017(MAP kin…	04010(MAPK signaling pathway)	K04459	3.1.3.48;EC:3.1.3.16
1	ENSDARG00000075121	hbegfa	5.16467	4.05867	0.347669	0.703	0.697	3.35315e-53	9.29225e-49	heparin-binding EGF-like growth factor a [Source:ZFIN;Acc:ZDB-GENE-080204-119]	GO:0005154(epidermal growth factor receptor binding);GO:0005615(extracellular space);GO:0007173(epidermal growth factor receptor signaling pathway);GO:0008083(growth factor activity);GO:0008284(positive regulation of cell population proliferation);GO:0009611(response to wounding);GO:0010469(regulation of signaling receptor activity);GO:0016020(membrane);GO:0016021(integral component of membrane);…	04012(ErbB signaling pathway);04912(GnRH signaling pathway)	K08523	NA
1	ENSDARG00000013144	atp1b1a	6.31446	5.17197	0.287946	0.869	0.867	2.14214e-51	5.93631e-47	ATPase Na+/K+ transporting subunit beta 1a [Source:ZFIN;Acc:ZDB-GENE-001127-3]	GO:0001671(ATPase activator activity);GO:0005391(sodium:potassium-exchanging ATPase activity);GO:0005890(sodium:potassium-exchanging ATPase complex);GO:0006811(ion transport);GO:0006813(potassium ion transport);GO:0006814(sodium ion transport);GO:0006883(cellular sodium ion homeostasis);GO:0010248(establishment or maintenance of transmembrane electrochemical gradient);GO:0016020(membrane);GO:0016…	04260(Cardiac muscle contraction);04261(Adrenergic signaling in cardiomyocytes)	K01540	NA
1	ENSDARG00000025428	socs3a	7.78996	5.80436	0.424478	0.687	0.631	4.8699e-50	1.34955e-45	suppressor of cytokine signaling 3a [Source:ZFIN;Acc:ZDB-GENE-030131-7349]	GO:0005942(phosphatidylinositol 3-kinase complex);GO:0007259(receptor signaling pathway via JAK-STAT);GO:0016567(protein ubiquitination);GO:0031099(regeneration);GO:0035556(intracellular signal transduction);GO:0035677(posterior lateral line neuromast hair cell development);GO:0043066(negative regulation of apoptotic process);GO:0043551(regulation of phosphatidylinositol 3-kinase activity);GO:004…	NA	NA	NA
1	ENSDARG00000099411	zgc:158343	26.2382	18.3461	0.516191	0.858	0.867	1.15665e-49	3.20532e-45	zgc:158343 [Source:ZFIN;Acc:ZDB-GENE-061201-9]	GO:0003674(molecular_function);GO:0043066(negative regulation of apoptotic process)	NA	NA	NA
1	ENSDARG00000002710	ncl	3.78479	3.151	0.264403	0.75	0.721	6.81529e-49	1.88865e-44	nucleolin [Source:ZFIN;Acc:ZDB-GENE-030131-6986]	GO:0001947(heart looping);GO:0003676(nucleic acid binding);GO:0003723(RNA binding);GO:0003729(mRNA binding);GO:0005634(nucleus);GO:0005737(cytoplasm);GO:0006364(rRNA processing);GO:0009303(rRNA transcription);GO:0071014(post-mRNA release spliceosomal complex);GO:1990904(ribonucleoprotein complex);GO:2000815(regulation of mRNA stability involved in response to oxidative stress)	NA	K11294	NA
1	ENSDARG00000103720	zgc:162730	12.0216	9.62749	0.320398	0.805	0.748	1.25154e-48	3.46828e-44	zgc:162730 [Source:ZFIN;Acc:ZDB-GENE-030131-6366]	GO:0003730(mRNA 3'-UTR binding);GO:0005829(cytosol);GO:0046872(metal ion binding);GO:0061158(3'-UTR-mediated mRNA destabilization)	NA	NA	NA
1	ENSDARG00000016200	trib3	1.54711	1.22119	0.341292	0.36	0.281	2.52799e-48	7.00556e-44	tribbles pseudokinase 3 [Source:ZFIN;Acc:ZDB-GENE-040426-2609]	GO:0001947(heart looping);GO:0003714(transcription corepressor activity);GO:0004672(protein kinase activity);GO:0005524(ATP binding);GO:0005634(nucleus);GO:0006468(protein phosphorylation);GO:0007368(determination of left/right symmetry);GO:0031434(mitogen-activated protein kinase kinase binding);GO:0032436(positive regulation of proteasomal ubiquitin-dependent protein catabolic process);GO:00434…	NA	K19518	NA
1	ENSDARG00000100835	RGS13 (1 of many)	1.15438	0.948437	0.283499	0.334	0.285	3.58266e-47	9.92827e-43	si:ch211-117l17.5 [Source:ZFIN;Acc:ZDB-GENE-110914-230]	NA	NA	K16449	NA
1	ENSDARG00000052656	si:ch211-193e13.5	1.34843	1.0937	0.302065	0.359	0.315	8.90274e-47	2.46713e-42	si:ch211-193e13.5 [Source:ZFIN;Acc:ZDB-GENE-081104-158]	GO:0016020(membrane);GO:0016021(integral component of membrane)	NA	NA	NA
1	ENSDARG00000005593	rxrga	1.00536	0.832766	0.27173	0.308	0.267	5.09213e-46	1.41113e-41	retinoid x receptor, gamma a [Source:ZFIN;Acc:ZDB-GENE-980526-36]	NA	03320(PPAR signaling pathway);04920(Adipocytokine signaling pathway)	K08524	NA
1	ENSDARG00000054304	homeza	1.22686	1.01877	0.268136	0.365	0.326	2.22586e-45	6.1683e-41	homeobox and leucine zipper encoding a [Source:ZFIN;Acc:ZDB-GENE-030616-592]	GO:0000122(negative regulation of transcription by RNA polymerase II);GO:0003677(DNA binding);GO:0003700(DNA-binding transcription factor activity);GO:0003714(transcription corepressor activity);GO:0005634(nucleus)	NA	NA	NA
1	ENSDARG00000043624	pqlc2	1.85789	1.54356	0.267398	0.427	0.401	1.2924e-44	3.58149e-40	PQ loop repeat containing 2 [Source:ZFIN;Acc:ZDB-GENE-050306-4]	GO:0005765(lysosomal membrane);GO:0008150(biological_process);GO:0015174(basic amino acid transmembrane transporter activity);GO:0015181(arginine transmembrane transporter activity);GO:0015189(L-lysine transmembrane transporter activity);GO:0016020(membrane);GO:0016021(integral component of membrane);GO:1903401(L-lysine transmembrane transport);GO:1903826(arginine transmembrane transport);GO:1990…	NA	NA	NA
1	ENSDARG00000027088	ptgdsb.1	0.45352	0.369013	0.297497	0.156	0.077	5.15216e-44	1.42777e-39	prostaglandin D2 synthase b, tandem duplicate 1 [Source:ZFIN;Acc:ZDB-GENE-030131-8436]	GO:0001972(retinoic acid binding);GO:0036094(small molecule binding)	00590(Arachidonic acid metabolism)	K01830	EC:5.3.99.2
1	ENSDARG00000052690	arrdc3a	0.569457	0.456371	0.31938	0.159	0.108	5.56642e-44	1.54257e-39	arrestin domain containing 3a [Source:ZFIN;Acc:ZDB-GENE-030131-2913]	GO:0003674(molecular_function);GO:0005575(cellular_component)	NA	NA	NA
1	ENSDARG00000053542	kctd12.2	5.42883	4.50991	0.267544	0.692	0.707	1.51677e-42	4.20326e-38	potassium channel tetramerisation domain containing 12.2 [Source:ZFIN;Acc:ZDB-GENE-060117-4]	GO:0005515(protein binding);GO:0021986(habenula development);GO:0048814(regulation of dendrite morphogenesis);GO:0051260(protein homooligomerization)	NA	K21918	NA
1	ENSDARG00000090730	cfbl	2.70715	2.12917	0.346487	0.453	0.352	4.27416e-39	1.18445e-34	complement factor b, like [Source:ZFIN;Acc:ZDB-GENE-030131-2319]	GO:0004252(serine-type endopeptidase activity);GO:0005576(extracellular region);GO:0006508(proteolysis);GO:0006956(complement activation);GO:0009617(response to bacterium)	NA	K01335	EC:3.4.21.47
1	ENSDARG00000036774	rgs12b	0.741672	0.614883	0.270468	0.224	0.181	1.10357e-35	3.05821e-31	regulator of G protein signaling 12b [Source:ZFIN;Acc:ZDB-GENE-031006-13]	GO:0005515(protein binding);GO:0007165(signal transduction);GO:0030695(GTPase regulator activity);GO:0050790(regulation of catalytic activity)	NA	K16449	NA
1	ENSDARG00000031776	fthl27	6.89808	5.57777	0.306505	0.822	0.79	5.85678e-35	1.62303e-30	ferritin, heavy polypeptide-like 27 [Source:ZFIN;Acc:ZDB-GENE-040718-72]	GO:0004322(ferroxidase activity);GO:0005506(iron ion binding);GO:0005737(cytoplasm);GO:0006826(iron ion transport);GO:0006879(cellular iron ion homeostasis);GO:0006880(intracellular sequestering of iron ion);GO:0008198(ferrous iron binding);GO:0008199(ferric iron binding);GO:0042802(identical protein binding);GO:0046872(metal ion binding);GO:0055114(oxidation-reduction process)	04216(Ferroptosis);04217(Necroptosis)	K00522	EC:1.16.3.2
1	ENSDARG00000056783	raraa	6.4338	5.19862	0.307544	0.697	0.709	8.26956e-32	2.29166e-27	retinoic acid receptor, alpha a [Source:ZFIN;Acc:ZDB-GENE-980526-284]	GO:0000122(negative regulation of transcription by RNA polymerase II);GO:0000976(transcription regulatory region sequence-specific DNA binding);GO:0000977(RNA polymerase II regulatory region sequence-specific DNA binding);GO:0000981(DNA-binding transcription factor activity, RNA polymerase II-specific);GO:0001889(liver development);GO:0003677(DNA binding);GO:0003700(DNA-binding transcription fact…	NA	K08527	NA
1	ENSDARG00000060094	ptgis	0.373398	0.30981	0.269329	0.105	0.047	2.30772e-30	6.39515e-26	prostaglandin I2 (prostacyclin) synthase [Source:ZFIN;Acc:ZDB-GENE-070116-1]	GO:0001516(prostaglandin biosynthetic process);GO:0004497(monooxygenase activity);GO:0005506(iron ion binding);GO:0005783(endoplasmic reticulum);GO:0005789(endoplasmic reticulum membrane);GO:0006629(lipid metabolic process);GO:0006631(fatty acid metabolic process);GO:0006633(fatty acid biosynthetic process);GO:0006693(prostaglandin metabolic process);GO:0008116(prostaglandin-I synthase activity);…	00590(Arachidonic acid metabolism)	K01831	EC:5.3.99.4
1	ENSDARG00000038011	cyth4a	0.769918	0.632635	0.28333	0.202	0.156	3.08065e-26	8.53709e-22	cytohesin 4a [Source:ZFIN;Acc:ZDB-GENE-090624-6]	GO:0005086(ARF guanyl-nucleotide exchange factor activity);GO:0032012(regulation of ARF protein signal transduction);GO:0055113(epiboly involved in gastrulation with mouth forming second)	04144(Endocytosis)	K18441	NA
1	ENSDARG00000100461	CABZ01078737.1	1.37782	1.10495	0.318415	0.226	0.155	6.09059e-25	1.68783e-20	interleukin-1 receptor type 2 [Source:NCBI gene;Acc:101882195]	GO:0016020(membrane);GO:0016021(integral component of membrane)	NA	NA	NA
1	ENSDARG00000101088	si:ch73-359m17.5	0.795206	0.625314	0.346747	0.158	0.113	6.1309e-23	1.699e-18	si:ch73-359m17.5 [Source:ZFIN;Acc:ZDB-GENE-141212-366]	GO:0016020(membrane);GO:0016021(integral component of membrane)	NA	NA	NA
1	ENSDARG00000055705	f5	1.48819	1.18716	0.326043	0.269	0.215	1.3175e-22	3.65106e-18	coagulation factor V [Source:ZFIN;Acc:ZDB-GENE-030131-5531]	GO:0005507(copper ion binding);GO:0009617(response to bacterium);GO:0046872(metal ion binding)	NA	NA	NA
1	ENSDARG00000069769	gig2j	1.43847	1.11499	0.367499	0.203	0.174	1.37092e-19	3.7991e-15	grass carp reovirus (GCRV)-induced gene 2j [Source:ZFIN;Acc:ZDB-GENE-081022-181]	GO:0003950(NAD+ ADP-ribosyltransferase activity);GO:0005575(cellular_component);GO:0005737(cytoplasm)	NA	NA	NA
1	ENSDARG00000104399	tppp	7.67224	5.87336	0.385461	0.271	0.303	4.59672e-17	1.27384e-12	tubulin polymerization promoting protein [Source:ZFIN;Acc:ZDB-GENE-101115-2]	NA	NA	NA	NA
1	ENSDARG00000025254	s100a10b	2.46495	1.78124	0.468676	0.226	0.224	1.94349e-16	5.3858e-12	S100 calcium binding protein A10b [Source:ZFIN;Acc:ZDB-GENE-040426-1937]	GO:0005509(calcium ion binding);GO:0005575(cellular_component);GO:0042127(regulation of cell population proliferation);GO:0046872(metal ion binding);GO:0048306(calcium-dependent protein binding)	NA	NA	NA
1	ENSDARG00000091996	tcnbb	4.4016	3.16221	0.477092	0.267	0.22	4.34897e-11	1.20519e-06	transcobalamin beta b [Source:ZFIN;Acc:ZDB-GENE-030131-12]	GO:0071466(cellular response to xenobiotic stimulus)	NA	NA	NA
2	ENSDARG00000039579	cfd	8.10031	2.29344	1.82046	0.66	0.142	0	0	complement factor D (adipsin) [Source:ZFIN;Acc:ZDB-GENE-050522-411]	GO:0004252(serine-type endopeptidase activity);GO:0005575(cellular_component);GO:0006508(proteolysis);GO:0006957(complement activation, alternative pathway);GO:0008233(peptidase activity);GO:0008236(serine-type peptidase activity);GO:0016787(hydrolase activity)	NA	K01334	EC:3.4.21.46
2	ENSDARG00000023290	fabp3	3.61092	1.25948	1.51954	0.804	0.232	0	0	fatty acid binding protein 3, muscle and heart [Source:ZFIN;Acc:ZDB-GENE-020318-2]	GO:0001947(heart looping);GO:0007507(heart development);GO:0008289(lipid binding);GO:0043009(chordate embryonic development)	03320(PPAR signaling pathway)	K08752	NA
2	ENSDARG00000014165	ssr3	8.26646	2.88833	1.51703	0.951	0.505	0	0	signal sequence receptor, gamma [Source:ZFIN;Acc:ZDB-GENE-030131-9134]	GO:0005623(cell);GO:0006614(SRP-dependent cotranslational protein targeting to membrane);GO:0016020(membrane);GO:0016021(integral component of membrane)	04141(Protein processing in endoplasmic reticulum)	K13251	NA
2	ENSDARG00000010244	rpl22l1	8.55362	3.37014	1.34373	0.954	0.607	0	0	ribosomal protein L22-like 1 [Source:ZFIN;Acc:ZDB-GENE-060804-3]	GO:0003723(RNA binding);GO:0003735(structural constituent of ribosome);GO:0005622(intracellular);GO:0005840(ribosome);GO:0006412(translation);GO:0022625(cytosolic large ribosomal subunit);GO:0060216(definitive hemopoiesis)	03010(Ribosome)	K02891	NA
2	ENSDARG00000005230	ssr2	6.53045	2.65483	1.29856	0.941	0.535	0	0	signal sequence receptor, beta [Source:ZFIN;Acc:ZDB-GENE-010413-1]	GO:0005783(endoplasmic reticulum);GO:0005789(endoplasmic reticulum membrane);GO:0016020(membrane);GO:0016021(integral component of membrane)	04141(Protein processing in endoplasmic reticulum)	K13250	NA
2	ENSDARG00000056119	eef1g	34.9852	14.9752	1.22417	1	0.949	0	0	eukaryotic translation elongation factor 1 gamma [Source:ZFIN;Acc:ZDB-GENE-020423-3]	GO:0003746(translation elongation factor activity);GO:0005515(protein binding);GO:0005634(nucleus);GO:0005737(cytoplasm);GO:0006412(translation);GO:0006414(translational elongation)	NA	K03233	NA
2	ENSDARG00000007320	rpl7	39.7758	17.392	1.19346	1	0.951	0	0	ribosomal protein L7 [Source:ZFIN;Acc:ZDB-GENE-030131-8654]	GO:0000463(maturation of LSU-rRNA from tricistronic rRNA transcript (SSU-rRNA, 5.8S rRNA, LSU-rRNA));GO:0003735(structural constituent of ribosome);GO:0005840(ribosome);GO:0022625(cytosolic large ribosomal subunit);GO:0051726(regulation of cell cycle)	03010(Ribosome)	K02937	NA
2	ENSDARG00000011201	rplp2l	41.7954	18.5373	1.17291	1	0.961	0	0	ribosomal protein, large P2, like [Source:ZFIN;Acc:ZDB-GENE-070327-2]	GO:0003735(structural constituent of ribosome);GO:0005622(intracellular);GO:0005840(ribosome);GO:0006414(translational elongation);GO:0043009(chordate embryonic development)	03010(Ribosome)	K02943	NA
2	ENSDARG00000009285	rpl15	38.8288	17.2692	1.16893	1	0.966	0	0	ribosomal protein L15 [Source:ZFIN;Acc:ZDB-GENE-040801-183]	GO:0002181(cytoplasmic translation);GO:0003723(RNA binding);GO:0003735(structural constituent of ribosome);GO:0005622(intracellular);GO:0005840(ribosome);GO:0006412(translation);GO:0022625(cytosolic large ribosomal subunit)	03010(Ribosome)	K02877	NA
2	ENSDARG00000019230	rpl7a	47.8917	21.3368	1.16643	1	0.977	0	0	ribosomal protein L7a [Source:ZFIN;Acc:ZDB-GENE-031001-9]	GO:0000470(maturation of LSU-rRNA);GO:0003723(RNA binding);GO:0005840(ribosome);GO:0022625(cytosolic large ribosomal subunit);GO:0042254(ribosome biogenesis);GO:1990904(ribonucleoprotein complex)	03010(Ribosome)	K02936	NA
2	ENSDARG00000019444	ssr4	3.98784	1.78717	1.15793	0.906	0.409	0	0	signal sequence receptor, delta [Source:ZFIN;Acc:ZDB-GENE-030131-4900]	GO:0005783(endoplasmic reticulum);GO:0016020(membrane);GO:0016021(integral component of membrane);GO:0071391(cellular response to estrogen stimulus)	04141(Protein processing in endoplasmic reticulum)	K04571	NA
2	ENSDARG00000003599	rpl3	22.2441	10.0164	1.15105	0.998	0.926	0	0	ribosomal protein L3 [Source:ZFIN;Acc:ZDB-GENE-030131-1291]	GO:0000027(ribosomal large subunit assembly);GO:0003735(structural constituent of ribosome);GO:0005622(intracellular);GO:0005840(ribosome);GO:0006412(translation);GO:0022625(cytosolic large ribosomal subunit);GO:0031017(exocrine pancreas development)	03010(Ribosome)	K02925	NA
2	ENSDARG00000057789	lyz	1268.46	572.949	1.1466	1	0.992	0	0	lysozyme [Source:ZFIN;Acc:ZDB-GENE-020515-2]	GO:0003796(lysozyme activity)	NA	K01185	EC:3.2.1.17
2	ENSDARG00000036875	rps12	39.0818	17.7475	1.13888	0.999	0.964	0	0	ribosomal protein S12 [Source:ZFIN;Acc:ZDB-GENE-030131-8951]	GO:0003735(structural constituent of ribosome);GO:0005622(intracellular);GO:0005840(ribosome);GO:0006412(translation);GO:0022627(cytosolic small ribosomal subunit)	03010(Ribosome)	K02951	NA
2	ENSDARG00000042566	rps7	46.2117	21.3734	1.11244	1	0.973	0	0	ribosomal protein S7 [Source:ZFIN;Acc:ZDB-GENE-040426-1718]	GO:0003735(structural constituent of ribosome);GO:0005622(intracellular);GO:0005840(ribosome);GO:0006364(rRNA processing);GO:0006412(translation);GO:0022627(cytosolic small ribosomal subunit);GO:0030097(hemopoiesis);GO:0032040(small-subunit processome);GO:0042274(ribosomal small subunit biogenesis);GO:0043009(chordate embryonic development);GO:0051726(regulation of cell cycle)	03010(Ribosome)	K02993	NA
2	ENSDARG00000058451	rpl6	19.5516	9.06957	1.10818	0.997	0.9	0	0	ribosomal protein L6 [Source:ZFIN;Acc:ZDB-GENE-030131-8671]	GO:0000027(ribosomal large subunit assembly);GO:0002181(cytoplasmic translation);GO:0003723(RNA binding);GO:0003735(structural constituent of ribosome);GO:0005622(intracellular);GO:0005840(ribosome);GO:0006412(translation);GO:0022625(cytosolic large ribosomal subunit);GO:0031016(pancreas development);GO:0043009(chordate embryonic development)	03010(Ribosome)	K02934	NA
2	ENSDARG00000029533	rpl18	41.3394	19.3402	1.09592	1	0.961	0	0	ribosomal protein L18 [Source:ZFIN;Acc:ZDB-GENE-040801-165]	GO:0003735(structural constituent of ribosome);GO:0005622(intracellular);GO:0005840(ribosome);GO:0006412(translation);GO:0022625(cytosolic large ribosomal subunit)	03010(Ribosome)	K02883	NA
2	ENSDARG00000015862	rpl5b	11.2236	5.25407	1.09503	0.992	0.798	0	0	ribosomal protein L5b [Source:ZFIN;Acc:ZDB-GENE-040625-93]	GO:0000027(ribosomal large subunit assembly);GO:0003735(structural constituent of ribosome);GO:0005622(intracellular);GO:0005840(ribosome);GO:0006412(translation);GO:0008097(5S rRNA binding);GO:0022625(cytosolic large ribosomal subunit)	03010(Ribosome)	K02932	NA
2	ENSDARG00000006691	rpl12	43.2631	20.3149	1.0906	1	0.974	0	0	ribosomal protein L12 [Source:ZFIN;Acc:ZDB-GENE-030131-5297]	GO:0000027(ribosomal large subunit assembly);GO:0003735(structural constituent of ribosome);GO:0005840(ribosome);GO:0006412(translation);GO:0015934(large ribosomal subunit);GO:0019843(rRNA binding);GO:0022625(cytosolic large ribosomal subunit);GO:0070180(large ribosomal subunit rRNA binding)	03010(Ribosome)	K02870	NA
2	ENSDARG00000021339	cpa5	37.6169	17.7102	1.08681	0.985	0.812	0	0	carboxypeptidase A5 [Source:ZFIN;Acc:ZDB-GENE-020514-1]	GO:0004180(carboxypeptidase activity);GO:0004181(metallocarboxypeptidase activity);GO:0005615(extracellular space);GO:0006508(proteolysis);GO:0008270(zinc ion binding)	NA	K08779	EC:3.4.17.1
2	ENSDARG00000044521	eef1b2	19.2783	9.11628	1.08046	1	0.892	0	0	eukaryotic translation elongation factor 1 beta 2 [Source:ZFIN;Acc:ZDB-GENE-030131-7310]	GO:0003676(nucleic acid binding);GO:0003746(translation elongation factor activity);GO:0005853(eukaryotic translation elongation factor 1 complex);GO:0006412(translation);GO:0006414(translational elongation);GO:0008270(zinc ion binding)	NA	K03232	NA
2	ENSDARG00000042905	rpl10a	45.6065	21.6378	1.07569	1	0.964	0	0	ribosomal protein L10a [Source:ZFIN;Acc:ZDB-GENE-030131-2025]	GO:0000470(maturation of LSU-rRNA);GO:0003723(RNA binding);GO:0003735(structural constituent of ribosome);GO:0005840(ribosome);GO:0006412(translation);GO:0015934(large ribosomal subunit);GO:0022625(cytosolic large ribosomal subunit)	03010(Ribosome)	K02865	NA
2	ENSDARG00000025073	rpl18a	47.0128	22.3052	1.07568	1	0.98	0	0	ribosomal protein L18a [Source:ZFIN;Acc:ZDB-GENE-040426-1071]	GO:0003735(structural constituent of ribosome);GO:0005840(ribosome);GO:0006412(translation);GO:0022625(cytosolic large ribosomal subunit)	03010(Ribosome)	K02882	NA
2	ENSDARG00000014690	rps4x	36.4176	17.3007	1.0738	1	0.97	0	0	ribosomal protein S4 X-linked [Source:ZFIN;Acc:ZDB-GENE-040927-19]	GO:0003723(RNA binding);GO:0003735(structural constituent of ribosome);GO:0005622(intracellular);GO:0005840(ribosome);GO:0006412(translation);GO:0007420(brain development);GO:0019843(rRNA binding);GO:0022627(cytosolic small ribosomal subunit);GO:0043009(chordate embryonic development)	03010(Ribosome)	K02987	NA
2	ENSDARG00000055996	rps8a	47.8183	22.763	1.07087	1	0.98	0	0	ribosomal protein S8a [Source:ZFIN;Acc:ZDB-GENE-030131-8626]	GO:0000462(maturation of SSU-rRNA from tricistronic rRNA transcript (SSU-rRNA, 5.8S rRNA, LSU-rRNA));GO:0003735(structural constituent of ribosome);GO:0005622(intracellular);GO:0005840(ribosome);GO:0006412(translation);GO:0022627(cytosolic small ribosomal subunit);GO:0043009(chordate embryonic development);GO:0051726(regulation of cell cycle)	03010(Ribosome)	K02995	NA
2	ENSDARG00000036044	rps20	61.3843	29.6353	1.05055	1	0.988	0	0	ribosomal protein S20 [Source:ZFIN;Acc:ZDB-GENE-040426-2284]	NA	03010(Ribosome)	K02969	NA
2	ENSDARG00000019778	rps6	28.5884	13.9753	1.03255	1	0.948	0	0	ribosomal protein S6 [Source:ZFIN;Acc:ZDB-GENE-040801-8]	GO:0003735(structural constituent of ribosome);GO:0005622(intracellular);GO:0005840(ribosome);GO:0006412(translation)	03010(Ribosome);04150(mTOR signaling pathway);04371(Apelin signaling pathway);04910(Insulin signaling pathway)	K02991	NA
2	ENSDARG00000011405	rps9	39.3647	19.3434	1.02506	1	0.977	0	0	ribosomal protein S9 [Source:ZFIN;Acc:ZDB-GENE-010724-15]	GO:0003723(RNA binding);GO:0003735(structural constituent of ribosome);GO:0005622(intracellular);GO:0005840(ribosome);GO:0006412(translation);GO:0015935(small ribosomal subunit);GO:0019843(rRNA binding);GO:0022627(cytosolic small ribosomal subunit);GO:0045903(positive regulation of translational fidelity)	03010(Ribosome)	K02997	NA
2	ENSDARG00000005926	ak2	6.9766	3.45279	1.01476	0.952	0.655	0	0	adenylate kinase 2 [Source:ZFIN;Acc:ZDB-GENE-030131-512]	GO:0000166(nucleotide binding);GO:0002244(hematopoietic progenitor cell differentiation);GO:0002521(leukocyte differentiation);GO:0004017(adenylate kinase activity);GO:0005524(ATP binding);GO:0005739(mitochondrion);GO:0005758(mitochondrial intermembrane space);GO:0006139(nucleobase-containing compound metabolic process);GO:0006172(ADP biosynthetic process);GO:0016301(kinase activity);GO:0016310(p…	00230(Purine metabolism);00730(Thiamine metabolism)	K00939	EC:2.7.4.3
2	ENSDARG00000102291	eef1da	8.45241	4.18397	1.01449	0.985	0.727	0	0	eukaryotic translation elongation factor 1 delta a (guanine nucleotide exchange protein) [Source:ZFIN;Acc:ZDB-GENE-040426-2740]	GO:0003746(translation elongation factor activity);GO:0005853(eukaryotic translation elongation factor 1 complex);GO:0006412(translation);GO:0006414(translational elongation)	NA	K15410	NA
2	ENSDARG00000057556	rpl17	43.9785	21.7696	1.01448	1	0.968	0	0	ribosomal protein L17 [Source:ZFIN;Acc:ZDB-GENE-030131-8585]	GO:0002181(cytoplasmic translation);GO:0003735(structural constituent of ribosome);GO:0005622(intracellular);GO:0005840(ribosome);GO:0006412(translation);GO:0015934(large ribosomal subunit);GO:0022625(cytosolic large ribosomal subunit)	03010(Ribosome)	K02880	NA
2	ENSDARG00000035692	rps3a	42.6392	21.2044	1.00782	1	0.975	0	0	ribosomal protein S3A [Source:ZFIN;Acc:ZDB-GENE-030131-9184]	GO:0003735(structural constituent of ribosome);GO:0005622(intracellular);GO:0005737(cytoplasm);GO:0005829(cytosol);GO:0005840(ribosome);GO:0006412(translation);GO:0022627(cytosolic small ribosomal subunit);GO:0043009(chordate embryonic development)	03010(Ribosome)	K02984	NA
2	ENSDARG00000037350	rpl9.1	34.4097	17.1131	1.00771	1	0.96	0	0	ribosomal protein L9 [Source:ZFIN;Acc:ZDB-GENE-030131-8646]	GO:0002181(cytoplasmic translation);GO:0003735(structural constituent of ribosome);GO:0005622(intracellular);GO:0005840(ribosome);GO:0006412(translation);GO:0019843(rRNA binding);GO:0022625(cytosolic large ribosomal subunit)	03010(Ribosome)	K02940	NA
2	ENSDARG00000043453	rps5	48.8938	24.5233	0.995495	1	0.98	0	0	ribosomal protein S5 [Source:ZFIN;Acc:ZDB-GENE-020419-12]	GO:0000028(ribosomal small subunit assembly);GO:0003723(RNA binding);GO:0003729(mRNA binding);GO:0003735(structural constituent of ribosome);GO:0005840(ribosome);GO:0006412(translation);GO:0015935(small ribosomal subunit);GO:0019843(rRNA binding);GO:0022627(cytosolic small ribosomal subunit)	03010(Ribosome)	K02989	NA
2	ENSDARG00000045487	rps16	27.8608	14.1006	0.982486	1	0.958	0	0	ribosomal protein S16 [Source:ZFIN;Acc:ZDB-GENE-050506-107]	GO:0000462(maturation of SSU-rRNA from tricistronic rRNA transcript (SSU-rRNA, 5.8S rRNA, LSU-rRNA));GO:0003723(RNA binding);GO:0003735(structural constituent of ribosome);GO:0005840(ribosome);GO:0006412(translation);GO:0022627(cytosolic small ribosomal subunit)	03010(Ribosome)	K02960	NA
2	ENSDARG00000104011	rps17	22.9509	11.7142	0.970289	0.997	0.929	0	0	ribosomal protein S17 [Source:ZFIN;Acc:ZDB-GENE-040426-1852]	GO:0003735(structural constituent of ribosome);GO:0005622(intracellular);GO:0005840(ribosome);GO:0006412(translation)	03010(Ribosome)	K02962	NA
2	ENSDARG00000051783	rplp0	61.7535	31.5892	0.967089	1	0.993	0	0	ribosomal protein, large, P0 [Source:ZFIN;Acc:ZDB-GENE-000629-1]	GO:0005622(intracellular);GO:0005840(ribosome);GO:0042254(ribosome biogenesis)	03010(Ribosome)	K02941	NA
2	ENSDARG00000014867	rpl8	42.7268	21.9151	0.963217	1	0.974	0	0	ribosomal protein L8 [Source:ZFIN;Acc:ZDB-GENE-040426-1670]	GO:0002181(cytoplasmic translation);GO:0003723(RNA binding);GO:0003735(structural constituent of ribosome);GO:0005737(cytoplasm);GO:0005840(ribosome);GO:0006412(translation);GO:0015934(large ribosomal subunit);GO:0019843(rRNA binding);GO:0022625(cytosolic large ribosomal subunit)	03010(Ribosome)	K02938	NA
2	ENSDARG00000041182	rpl4	14.6628	7.58145	0.951618	0.997	0.886	0	0	ribosomal protein L4 [Source:ZFIN;Acc:ZDB-GENE-030131-9034]	GO:0003735(structural constituent of ribosome);GO:0005840(ribosome);GO:0006412(translation);GO:0022625(cytosolic large ribosomal subunit)	03010(Ribosome)	K02930	NA
2	ENSDARG00000020197	rpl5a	16.8291	8.74714	0.944073	0.999	0.898	0	0	ribosomal protein L5a [Source:ZFIN;Acc:ZDB-GENE-030131-5161]	GO:0000027(ribosomal large subunit assembly);GO:0003735(structural constituent of ribosome);GO:0005622(intracellular);GO:0005840(ribosome);GO:0006412(translation);GO:0008097(5S rRNA binding);GO:0022625(cytosolic large ribosomal subunit);GO:0043009(chordate embryonic development)	03010(Ribosome)	K02932	NA
2	ENSDARG00000041619	rack1	32.8514	17.0805	0.943606	1	0.977	0	0	receptor for activated C kinase 1 [Source:ZFIN;Acc:ZDB-GENE-990415-89]	GO:0001525(angiogenesis);GO:0001934(positive regulation of protein phosphorylation);GO:0005080(protein kinase C binding);GO:0005515(protein binding);GO:0005634(nucleus);GO:0005737(cytoplasm);GO:0005829(cytosol);GO:0005840(ribosome);GO:0019899(enzyme binding);GO:0022627(cytosolic small ribosomal subunit);GO:0030178(negative regulation of Wnt signaling pathway);GO:0032880(regulation of protein loca…	NA	K14753	NA
2	ENSDARG00000099380	rpl13	51.1023	26.6392	0.939837	1	0.989	0	0	ribosomal protein L13 [Source:ZFIN;Acc:ZDB-GENE-031007-1]	GO:0003735(structural constituent of ribosome);GO:0005622(intracellular);GO:0005840(ribosome);GO:0006412(translation);GO:0022625(cytosolic large ribosomal subunit);GO:0051726(regulation of cell cycle)	03010(Ribosome)	K02873	NA
2	ENSDARG00000103007	rps3	26.1553	13.8701	0.915129	1	0.963	0	0	ribosomal protein S3 [Source:ZFIN;Acc:ZDB-GENE-030131-8494]	GO:0003684(damaged DNA binding);GO:0003723(RNA binding);GO:0003735(structural constituent of ribosome);GO:0003906(DNA-(apurinic or apyrimidinic site) endonuclease activity);GO:0005634(nucleus);GO:0005840(ribosome);GO:0006281(DNA repair);GO:0006412(translation);GO:0008534(oxidized purine nucleobase lesion DNA N-glycosylase activity);GO:0015935(small ribosomal subunit);GO:0022627(cytosolic small ri…	03010(Ribosome)	K02985	NA
2	ENSDARG00000036629	rps14	45.4861	24.1678	0.912343	1	0.982	0	0	ribosomal protein S14 [Source:ZFIN;Acc:ZDB-GENE-030131-8631]	GO:0000028(ribosomal small subunit assembly);GO:0000462(maturation of SSU-rRNA from tricistronic rRNA transcript (SSU-rRNA, 5.8S rRNA, LSU-rRNA));GO:0003735(structural constituent of ribosome);GO:0005840(ribosome);GO:0006412(translation);GO:0022627(cytosolic small ribosomal subunit);GO:0043009(chordate embryonic development);GO:0043249(erythrocyte maturation);GO:0048027(mRNA 5'-UTR binding);GO:00…	03010(Ribosome)	K02955	NA
2	ENSDARG00000100392	rps18	18.1928	9.73862	0.901576	0.998	0.922	0	0	ribosomal protein S18 [Source:ZFIN;Acc:ZDB-GENE-020419-20]	GO:0003676(nucleic acid binding);GO:0003723(RNA binding);GO:0003735(structural constituent of ribosome);GO:0005622(intracellular);GO:0005737(cytoplasm);GO:0005829(cytosol);GO:0005840(ribosome);GO:0006412(translation);GO:0007275(multicellular organism development);GO:0019843(rRNA binding);GO:0051726(regulation of cell cycle)	03010(Ribosome)	K02964	NA
2	ENSDARG00000053457	rpl23	43.3591	23.2791	0.897303	1	0.976	0	0	ribosomal protein L23 [Source:ZFIN;Acc:ZDB-GENE-030131-8756]	GO:0003735(structural constituent of ribosome);GO:0005840(ribosome);GO:0006412(translation);GO:0022625(cytosolic large ribosomal subunit);GO:0070180(large ribosomal subunit rRNA binding)	03010(Ribosome)	K02894	NA
2	ENSDARG00000102640	pdia3	3.686	1.98055	0.896155	0.897	0.433	0	0	protein disulfide isomerase family A, member 3 [Source:ZFIN;Acc:ZDB-GENE-031002-9]	GO:0003756(protein disulfide isomerase activity);GO:0005783(endoplasmic reticulum);GO:0006457(protein folding);GO:0009986(cell surface);GO:0016853(isomerase activity);GO:0034976(response to endoplasmic reticulum stress);GO:0045454(cell redox homeostasis)	04141(Protein processing in endoplasmic reticulum);05168(Herpes simplex virus 1 infection)	K08056	EC:5.3.4.1
2	ENSDARG00000043509	rpl11	38.4964	20.7975	0.888316	1	0.975	0	0	ribosomal protein L11 [Source:ZFIN;Acc:ZDB-GENE-040625-147]	GO:0000027(ribosomal large subunit assembly);GO:0003735(structural constituent of ribosome);GO:0005622(intracellular);GO:0005840(ribosome);GO:0006412(translation);GO:0006915(apoptotic process);GO:0022625(cytosolic large ribosomal subunit);GO:0030097(hemopoiesis);GO:0030218(erythrocyte differentiation);GO:0042541(hemoglobin biosynthetic process);GO:0042593(glucose homeostasis);GO:0043009(chordate …	03010(Ribosome)	K02868	NA
2	ENSDARG00000021864	rplp1	62.9058	34.0075	0.887341	1	0.992	0	0	ribosomal protein, large, P1 [Source:ZFIN;Acc:ZDB-GENE-030131-8663]	GO:0002181(cytoplasmic translation);GO:0003735(structural constituent of ribosome);GO:0005622(intracellular);GO:0005840(ribosome);GO:0006414(translational elongation);GO:0022625(cytosolic large ribosomal subunit);GO:0030218(erythrocyte differentiation);GO:0030295(protein kinase activator activity);GO:0032147(activation of protein kinase activity);GO:0043021(ribonucleoprotein complex binding)	03010(Ribosome)	K02942	NA
2	ENSDARG00000013307	rpl19	63.9201	34.8417	0.875452	1	0.989	0	0	ribosomal protein L19 [Source:ZFIN;Acc:ZDB-GENE-040426-2290]	GO:0003723(RNA binding);GO:0003735(structural constituent of ribosome);GO:0005622(intracellular);GO:0005840(ribosome);GO:0006412(translation);GO:0022625(cytosolic large ribosomal subunit);GO:0030097(hemopoiesis)	03010(Ribosome)	K02885	NA
2	ENSDARG00000101844	mibp2	9.50033	5.19945	0.869618	0.992	0.79	0	0	muscle-specific beta 1 integrin binding protein 2 [Source:ZFIN;Acc:ZDB-GENE-031113-14]	GO:0007045(cell-substrate adherens junction assembly);GO:0007229(integrin-mediated signaling pathway);GO:0007517(muscle organ development);GO:0016301(kinase activity);GO:0016310(phosphorylation);GO:0070831(basement membrane assembly)	00760(Nicotinate and nicotinamide metabolism)	K10524	2.7.1.173;EC:2.7.1.22
2	ENSDARG00000015128	rpl27	28.663	15.7166	0.866897	1	0.951	0	0	ribosomal protein L27 [Source:ZFIN;Acc:ZDB-GENE-030131-4343]	GO:0003735(structural constituent of ribosome);GO:0005622(intracellular);GO:0005737(cytoplasm);GO:0005783(endoplasmic reticulum);GO:0005791(rough endoplasmic reticulum);GO:0005829(cytosol);GO:0005840(ribosome);GO:0006412(translation);GO:0015934(large ribosomal subunit);GO:0022625(cytosolic large ribosomal subunit);GO:0030218(erythrocyte differentiation);GO:0098556(cytoplasmic side of rough endopl…	03010(Ribosome)	K02901	NA
2	ENSDARG00000006316	rpl23a	26.5533	14.5674	0.866145	1	0.952	0	0	ribosomal protein L23a [Source:ZFIN;Acc:ZDB-GENE-030131-7479]	GO:0000027(ribosomal large subunit assembly);GO:0003735(structural constituent of ribosome);GO:0005622(intracellular);GO:0005840(ribosome);GO:0006412(translation);GO:0022625(cytosolic large ribosomal subunit);GO:0031016(pancreas development);GO:0051726(regulation of cell cycle)	03010(Ribosome)	K02893	NA
2	ENSDARG00000092807	si:dkey-151g10.6	72.5353	39.8528	0.864004	1	0.997	0	0	si:dkey-151g10.6 [Source:ZFIN;Acc:ZDB-GENE-030131-7528]	GO:0003735(structural constituent of ribosome);GO:0005840(ribosome);GO:0006412(translation)	NA	NA	NA
2	ENSDARG00000021838	rps23	40.6318	22.3379	0.863117	1	0.976	0	0	ribosomal protein S23 [Source:ZFIN;Acc:ZDB-GENE-080220-50]	GO:0003735(structural constituent of ribosome);GO:0005840(ribosome);GO:0006412(translation);GO:0015935(small ribosomal subunit);GO:0022627(cytosolic small ribosomal subunit)	03010(Ribosome)	K02973	NA
2	ENSDARG00000062519	abcc13	4.0461	2.23131	0.858643	0.917	0.449	0	0	ATP-binding cassette, sub-family C (CFTR/MRP), member 13 [Source:ZFIN;Acc:ZDB-GENE-050517-26]	GO:0000166(nucleotide binding);GO:0005524(ATP binding);GO:0016020(membrane);GO:0016021(integral component of membrane);GO:0016887(ATPase activity);GO:0042626(ATPase activity, coupled to transmembrane movement of substances);GO:0055085(transmembrane transport)	NA	NA	NA
2	ENSDARG00000054818	rpl32	42.2678	23.3744	0.85463	1	0.981	0	0	ribosomal protein L32 [Source:ZFIN;Acc:ZDB-GENE-060331-105]	GO:0003735(structural constituent of ribosome);GO:0005622(intracellular);GO:0005840(ribosome);GO:0006412(translation);GO:0022625(cytosolic large ribosomal subunit)	03010(Ribosome)	K02912	NA
2	ENSDARG00000018334	rpl35	31.7806	17.7144	0.843226	1	0.964	0	0	ribosomal protein L35 [Source:ZFIN;Acc:ZDB-GENE-020419-2]	GO:0000463(maturation of LSU-rRNA from tricistronic rRNA transcript (SSU-rRNA, 5.8S rRNA, LSU-rRNA));GO:0003729(mRNA binding);GO:0003735(structural constituent of ribosome);GO:0005622(intracellular);GO:0005840(ribosome);GO:0006412(translation);GO:0007275(multicellular organism development);GO:0022625(cytosolic large ribosomal subunit);GO:0030218(erythrocyte differentiation);GO:0043009(chordate em…	03010(Ribosome)	K02918	NA
2	ENSDARG00000080010	adh5	1.72235	0.963122	0.83859	0.728	0.232	0	0	alcohol dehydrogenase 5 [Source:ZFIN;Acc:ZDB-GENE-011003-1]	GO:0004024(alcohol dehydrogenase activity, zinc-dependent);GO:0005829(cytosol);GO:0006069(ethanol oxidation);GO:0008270(zinc ion binding);GO:0016491(oxidoreductase activity);GO:0046294(formaldehyde catabolic process);GO:0046872(metal ion binding);GO:0051903(S-(hydroxymethyl)glutathione dehydrogenase activity);GO:0055114(oxidation-reduction process)	00010(Glycolysis / Gluconeogenesis);00071(Fatty acid degradation);00350(Tyrosine metabolism);00830(Retinol metabolism);00980(Metabolism of xenobiotics by cytochrome P450);00982(Drug metabolism - cytochrome P450)	K00121	1.1.1.1;EC:1.1.1.284
2	ENSDARG00000019181	rpsa	39.0441	21.8379	0.838271	1	0.986	0	0	ribosomal protein SA [Source:ZFIN;Acc:ZDB-GENE-040426-811]	GO:0000028(ribosomal small subunit assembly);GO:0000447(endonucleolytic cleavage in ITS1 to separate SSU-rRNA from 5.8S rRNA and LSU-rRNA from tricistronic rRNA transcript (SSU-rRNA, 5.8S rRNA, LSU-rRNA));GO:0000461(endonucleolytic cleavage to generate mature 3'-end of SSU-rRNA from (SSU-rRNA, 5.8S rRNA, LSU-rRNA));GO:0003735(structural constituent of ribosome);GO:0005055(laminin receptor activit…	03010(Ribosome)	K02998	NA
2	ENSDARG00000099022	faua	25.8435	14.5099	0.832762	1	0.96	0	0	Finkel-Biskis-Reilly murine sarcoma virus (FBR-MuSV) ubiquitously expressed a [Source:ZFIN;Acc:ZDB-GENE-040426-1700]	GO:0003735(structural constituent of ribosome);GO:0005515(protein binding);GO:0005622(intracellular);GO:0005840(ribosome);GO:0006412(translation);GO:0022627(cytosolic small ribosomal subunit)	03010(Ribosome)	K02983	NA
2	ENSDARG00000034897	rps10	40.551	22.8251	0.829117	1	0.983	0	0	ribosomal protein S10 [Source:ZFIN;Acc:ZDB-GENE-040426-1481]	GO:0000028(ribosomal small subunit assembly);GO:0003735(structural constituent of ribosome);GO:0005840(ribosome);GO:0022627(cytosolic small ribosomal subunit)	03010(Ribosome)	K02947	NA
2	ENSDARG00000023298	rps27.1	35.4581	20.0042	0.825807	1	0.976	0	0	ribosomal protein S27, isoform 1 [Source:ZFIN;Acc:ZDB-GENE-050522-549]	GO:0000028(ribosomal small subunit assembly);GO:0003735(structural constituent of ribosome);GO:0005622(intracellular);GO:0005840(ribosome);GO:0006412(translation);GO:0022627(cytosolic small ribosomal subunit);GO:0030218(erythrocyte differentiation);GO:0046872(metal ion binding)	03010(Ribosome)	K02978	NA
2	ENSDARG00000076568	sec61b	4.31389	2.43463	0.825284	0.941	0.554	0	0	Sec61 translocon beta subunit [Source:ZFIN;Acc:ZDB-GENE-040718-260]	GO:0005086(ARF guanyl-nucleotide exchange factor activity);GO:0005783(endoplasmic reticulum);GO:0005784(Sec61 translocon complex);GO:0006616(SRP-dependent cotranslational protein targeting to membrane, translocation);GO:0006886(intracellular protein transport);GO:0015031(protein transport);GO:0015450(P-P-bond-hydrolysis-driven protein transmembrane transporter activity);GO:0016020(membrane);GO:00…	03060(Protein export);04141(Protein processing in endoplasmic reticulum);04145(Phagosome)	K09481	NA
2	ENSDARG00000044093	rpl13a	29.7726	16.817	0.824061	1	0.962	0	0	ribosomal protein L13a [Source:ZFIN;Acc:ZDB-GENE-030131-168]	GO:0003729(mRNA binding);GO:0003735(structural constituent of ribosome);GO:0005840(ribosome);GO:0006412(translation);GO:0015934(large ribosomal subunit);GO:0017148(negative regulation of translation);GO:0022625(cytosolic large ribosomal subunit)	03010(Ribosome)	K02872	NA
2	ENSDARG00000034291	rpl37.1	34.8185	19.6965	0.821915	1	0.978	0	0	ribosomal protein L37 [Source:ZFIN;Acc:ZDB-GENE-040625-39]	GO:0003723(RNA binding);GO:0003735(structural constituent of ribosome);GO:0005622(intracellular);GO:0005840(ribosome);GO:0006412(translation);GO:0019843(rRNA binding);GO:0046872(metal ion binding)	03010(Ribosome)	K02922	NA
2	ENSDARG00000029500	rpl34	27.4797	15.6687	0.810478	1	0.966	0	0	ribosomal protein L34 [Source:ZFIN;Acc:ZDB-GENE-040426-1033]	GO:0003735(structural constituent of ribosome);GO:0005622(intracellular);GO:0005737(cytoplasm);GO:0005783(endoplasmic reticulum);GO:0005829(cytosol);GO:0005840(ribosome);GO:0006412(translation)	03010(Ribosome)	K02915	NA
2	ENSDARG00000039347	rps24	36.4096	20.8696	0.80292	1	0.974	0	0	ribosomal protein S24 [Source:ZFIN;Acc:ZDB-GENE-040109-5]	GO:0003735(structural constituent of ribosome);GO:0005622(intracellular);GO:0005840(ribosome);GO:0006412(translation);GO:0060215(primitive hemopoiesis);GO:0060216(definitive hemopoiesis)	03010(Ribosome)	K02974	NA
2	ENSDARG00000025581	rpl10	43.6896	25.1454	0.796999	1	0.982	0	0	ribosomal protein L10 [Source:ZFIN;Acc:ZDB-GENE-030131-8656]	GO:0000027(ribosomal large subunit assembly);GO:0003735(structural constituent of ribosome);GO:0005622(intracellular);GO:0005840(ribosome);GO:0006412(translation);GO:0006417(regulation of translation);GO:0007275(multicellular organism development);GO:0007420(brain development);GO:0022625(cytosolic large ribosomal subunit);GO:0045182(translation regulator activity);GO:1990403(embryonic brain devel…	03010(Ribosome)	K02866	NA
2	ENSDARG00000058105	rpl36a	33.3668	19.4688	0.77725	1	0.977	0	0	ribosomal protein L36A [Source:ZFIN;Acc:ZDB-GENE-020423-1]	GO:0003735(structural constituent of ribosome);GO:0005622(intracellular);GO:0005737(cytoplasm);GO:0005840(ribosome);GO:0006412(translation);GO:0022625(cytosolic large ribosomal subunit);GO:0043009(chordate embryonic development);GO:0051726(regulation of cell cycle)	03010(Ribosome)	K02929	NA
2	ENSDARG00000030408	rps26l	25.8628	15.1108	0.775293	1	0.959	0	0	ribosomal protein S26, like [Source:ZFIN;Acc:ZDB-GENE-040426-1706]	GO:0003729(mRNA binding);GO:0003735(structural constituent of ribosome);GO:0005622(intracellular);GO:0005840(ribosome);GO:0006412(translation);GO:0022627(cytosolic small ribosomal subunit)	03010(Ribosome)	K02976	NA
2	ENSDARG00000010160	rps15a	31.348	18.6044	0.752727	1	0.964	0	0	ribosomal protein S15a [Source:ZFIN;Acc:ZDB-GENE-030131-8708]	GO:0003735(structural constituent of ribosome);GO:0005840(ribosome);GO:0006412(translation);GO:0007420(brain development);GO:0022627(cytosolic small ribosomal subunit);GO:0030218(erythrocyte differentiation);GO:0043009(chordate embryonic development);GO:0051726(regulation of cell cycle)	03010(Ribosome)	K02957	NA
2	ENSDARG00000030602	rps19	34.7782	20.7306	0.74642	1	0.976	0	0	ribosomal protein S19 [Source:ZFIN;Acc:ZDB-GENE-040426-1716]	GO:0000028(ribosomal small subunit assembly);GO:0003735(structural constituent of ribosome);GO:0005622(intracellular);GO:0005840(ribosome);GO:0006412(translation);GO:0022627(cytosolic small ribosomal subunit);GO:0030218(erythrocyte differentiation);GO:0035284(brain segmentation);GO:0042541(hemoglobin biosynthetic process);GO:0043009(chordate embryonic development);GO:0045088(regulation of innate …	03010(Ribosome)	K02966	NA
2	ENSDARG00000053365	rpl31	32.8387	19.6156	0.743393	1	0.979	0	0	ribosomal protein L31 [Source:ZFIN;Acc:ZDB-GENE-060331-121]	GO:0002181(cytoplasmic translation);GO:0003735(structural constituent of ribosome);GO:0005622(intracellular);GO:0005840(ribosome);GO:0006412(translation);GO:0022625(cytosolic large ribosomal subunit)	03010(Ribosome)	K02910	NA
2	ENSDARG00000036298	rps13	34.5373	20.84	0.728795	1	0.981	0	0	ribosomal protein S13 [Source:ZFIN;Acc:ZDB-GENE-040625-52]	GO:0003735(structural constituent of ribosome);GO:0005622(intracellular);GO:0005730(nucleolus);GO:0005840(ribosome);GO:0006412(translation);GO:0022627(cytosolic small ribosomal subunit);GO:0070181(small ribosomal subunit rRNA binding)	03010(Ribosome)	K02953	NA
2	ENSDARG00000077291	rps2	63.3551	38.3891	0.722763	1	0.99	0	0	ribosomal protein S2 [Source:ZFIN;Acc:ZDB-GENE-040426-2454]	GO:0003723(RNA binding);GO:0003735(structural constituent of ribosome);GO:0005840(ribosome);GO:0006412(translation);GO:0015935(small ribosomal subunit);GO:0022627(cytosolic small ribosomal subunit);GO:1990904(ribonucleoprotein complex)	03010(Ribosome)	K02981	NA
2	ENSDARG00000046157	RPS17	21.2356	12.9196	0.716926	1	0.95	0	0	zgc:114188 [Source:ZFIN;Acc:ZDB-GENE-050320-15]	GO:0003735(structural constituent of ribosome);GO:0005622(intracellular);GO:0005840(ribosome);GO:0006412(translation)	03010(Ribosome)	K02962	NA
2	ENSDARG00000010516	rpl21	39.0032	23.807	0.712205	1	0.983	0	0	ribosomal protein L21 [Source:ZFIN;Acc:ZDB-GENE-030131-8512]	GO:0003735(structural constituent of ribosome);GO:0005622(intracellular);GO:0005840(ribosome);GO:0006412(translation);GO:0022625(cytosolic large ribosomal subunit)	03010(Ribosome)	K02889	NA
2	ENSDARG00000100371	eef2b	18.5124	11.3591	0.704641	1	0.962	0	0	eukaryotic translation elongation factor 2b [Source:ZFIN;Acc:ZDB-GENE-030131-5128]	GO:0003746(translation elongation factor activity);GO:0003924(GTPase activity);GO:0005525(GTP binding);GO:0005829(cytosol);GO:0006414(translational elongation);GO:0043009(chordate embryonic development);GO:0043022(ribosome binding);GO:0071466(cellular response to xenobiotic stimulus);GO:1990904(ribonucleoprotein complex)	NA	K03234	NA
2	ENSDARG00000041435	uba52	36.1168	22.2106	0.701417	1	0.983	0	0	ubiquitin A-52 residue ribosomal protein fusion product 1 [Source:ZFIN;Acc:ZDB-GENE-051023-7]	GO:0003735(structural constituent of ribosome);GO:0005515(protein binding);GO:0005634(nucleus);GO:0005737(cytoplasm);GO:0005840(ribosome);GO:0006412(translation);GO:0016567(protein ubiquitination);GO:0019941(modification-dependent protein catabolic process);GO:0022627(cytosolic small ribosomal subunit);GO:0031386(protein tag);GO:0031625(ubiquitin protein ligase binding)	03010(Ribosome)	K02927	NA
2	ENSDARG00000088030	rpl35a	24.7769	15.2739	0.697927	1	0.958	0	0	ribosomal protein L35a [Source:ZFIN;Acc:ZDB-GENE-040718-190]	GO:0002181(cytoplasmic translation);GO:0003735(structural constituent of ribosome);GO:0005622(intracellular);GO:0005840(ribosome);GO:0006412(translation);GO:0022625(cytosolic large ribosomal subunit);GO:0030218(erythrocyte differentiation);GO:0042273(ribosomal large subunit biogenesis);GO:0043009(chordate embryonic development)	03010(Ribosome)	K02917	NA
2	ENSDARG00000036316	rpl39	33.7399	20.8965	0.69119	1	0.98	0	0	ribosomal protein L39 [Source:ZFIN;Acc:ZDB-GENE-040625-51]	GO:0003735(structural constituent of ribosome);GO:0005622(intracellular);GO:0005840(ribosome);GO:0006412(translation);GO:0022625(cytosolic large ribosomal subunit)	03010(Ribosome)	K02924	NA
2	ENSDARG00000035871	rpl30	31.9897	19.8135	0.691122	1	0.98	0	0	ribosomal protein L30 [Source:ZFIN;Acc:ZDB-GENE-030131-8657]	GO:0003723(RNA binding);GO:0003735(structural constituent of ribosome);GO:0005622(intracellular);GO:0005840(ribosome);GO:0006412(translation);GO:0022625(cytosolic large ribosomal subunit)	03010(Ribosome)	K02908	NA
2	ENSDARG00000053058	rps11	31.874	19.7452	0.690879	1	0.963	0	0	ribosomal protein S11 [Source:ZFIN;Acc:ZDB-GENE-040426-2701]	GO:0003735(structural constituent of ribosome);GO:0005622(intracellular);GO:0005840(ribosome);GO:0006412(translation);GO:0022627(cytosolic small ribosomal subunit)	03010(Ribosome)	K02949	NA
2	ENSDARG00000070849	rps15	36.1105	22.402	0.688788	1	0.977	0	0	ribosomal protein S15 [Source:ZFIN;Acc:ZDB-GENE-030131-9092]	GO:0000028(ribosomal small subunit assembly);GO:0003723(RNA binding);GO:0003735(structural constituent of ribosome);GO:0005840(ribosome);GO:0006412(translation);GO:0015935(small ribosomal subunit);GO:0022627(cytosolic small ribosomal subunit);GO:0043009(chordate embryonic development)	03010(Ribosome)	K02958	NA
2	ENSDARG00000005791	rpl28	34.7916	21.9411	0.665105	1	0.983	0	0	ribosomal protein L28 [Source:ZFIN;Acc:ZDB-GENE-040930-10]	GO:0003735(structural constituent of ribosome);GO:0005622(intracellular);GO:0005840(ribosome);GO:0006412(translation);GO:0022625(cytosolic large ribosomal subunit);GO:0043009(chordate embryonic development)	03010(Ribosome)	K02903	NA
2	ENSDARG00000029150	hsp90ab1	61.6958	39.0895	0.65839	1	0.997	0	0	heat shock protein 90, alpha (cytosolic), class B member 1 [Source:ZFIN;Acc:ZDB-GENE-990415-95]	GO:0000166(nucleotide binding);GO:0001568(blood vessel development);GO:0005515(protein binding);GO:0005524(ATP binding);GO:0005576(extracellular region);GO:0005634(nucleus);GO:0005737(cytoplasm);GO:0005829(cytosol);GO:0005886(plasma membrane);GO:0006457(protein folding);GO:0007517(muscle organ development);GO:0009408(response to heat);GO:0009986(cell surface);GO:0019901(protein kinase binding);GO…	04141(Protein processing in endoplasmic reticulum);04217(Necroptosis);04621(NOD-like receptor signaling pathway);04914(Progesterone-mediated oocyte maturation)	K04079	NA
2	ENSDARG00000032725	rps27a	46.7998	29.8816	0.647246	1	0.992	0	0	ribosomal protein S27a [Source:ZFIN;Acc:ZDB-GENE-030131-10018]	GO:0003735(structural constituent of ribosome);GO:0005515(protein binding);GO:0005634(nucleus);GO:0005737(cytoplasm);GO:0005840(ribosome);GO:0006412(translation);GO:0016567(protein ubiquitination);GO:0019941(modification-dependent protein catabolic process);GO:0022627(cytosolic small ribosomal subunit);GO:0031386(protein tag);GO:0031625(ubiquitin protein ligase binding)	03010(Ribosome)	K02977	NA
2	ENSDARG00000099104	rpl24	34.5852	22.1092	0.645507	1	0.978	0	0	ribosomal protein L24 [Source:ZFIN;Acc:ZDB-GENE-020419-25]	NA	03010(Ribosome)	K02896	NA
2	ENSDARG00000074242	serbp1a	12.8235	8.20192	0.644754	0.998	0.911	0	0	SERPINE1 mRNA binding protein 1a [Source:ZFIN;Acc:ZDB-GENE-030131-7389]	GO:0003723(RNA binding);GO:0003730(mRNA 3'-UTR binding);GO:0005575(cellular_component);GO:0008150(biological_process)	NA	K13199	NA
2	ENSDARG00000020850	eef1a1l2	76.1998	48.8487	0.641468	1	0.999	0	0	eukaryotic translation elongation factor 1 alpha 1, like 2 [Source:ZFIN;Acc:ZDB-GENE-050706-188]	GO:0000166(nucleotide binding);GO:0003746(translation elongation factor activity);GO:0003924(GTPase activity);GO:0005525(GTP binding);GO:0005737(cytoplasm);GO:0006412(translation);GO:0006414(translational elongation)	03013(RNA transport)	K03231	NA
2	ENSDARG00000115271	RPL37A	28.7078	18.9969	0.595681	1	0.975	0	0	zgc:171772 [Source:ZFIN;Acc:ZDB-GENE-070928-31]	GO:0003735(structural constituent of ribosome);GO:0005622(intracellular);GO:0005840(ribosome);GO:0006412(translation)	03010(Ribosome)	K02921	NA
2	ENSDARG00000041232	rps29	43.3043	28.6796	0.594485	1	0.988	0	0	ribosomal protein S29 [Source:ZFIN;Acc:ZDB-GENE-040622-5]	GO:0001525(angiogenesis);GO:0001570(vasculogenesis);GO:0003735(structural constituent of ribosome);GO:0005622(intracellular);GO:0005840(ribosome);GO:0006412(translation);GO:0008270(zinc ion binding);GO:0022627(cytosolic small ribosomal subunit);GO:0030218(erythrocyte differentiation);GO:0043009(chordate embryonic development);GO:0048821(erythrocyte development);GO:0051726(regulation of cell cycle…	03010(Ribosome)	K02980	NA
2	ENSDARG00000041811	rps25	32.7035	21.7722	0.586959	1	0.979	0	0	ribosomal protein S25 [Source:ZFIN;Acc:ZDB-GENE-040426-1788]	GO:0005840(ribosome)	03010(Ribosome)	K02975	NA
2	ENSDARG00000005513	naca	21.7036	13.6602	0.667962	1	0.958	0	0	nascent polypeptide associated complex subunit alpha [Source:ZFIN;Acc:ZDB-GENE-020423-4]	GO:0005634(nucleus);GO:0005737(cytoplasm);GO:0005854(nascent polypeptide-associated complex);GO:0015031(protein transport);GO:0030239(myofibril assembly);GO:0060216(definitive hemopoiesis)	NA	NA	NA
2	ENSDARG00000075664	si:ch1073-429i10.1	25.3708	14.8958	0.768261	0.979	0.793	0	0	si:ch1073-429i10.1 [Source:ZFIN;Acc:ZDB-GENE-120215-259]	GO:0005637(nuclear inner membrane);GO:0006629(lipid metabolic process);GO:0016020(membrane);GO:0016021(integral component of membrane);GO:0016126(sterol biosynthetic process);GO:0016627(oxidoreductase activity, acting on the CH-CH group of donors);GO:0030176(integral component of endoplasmic reticulum membrane);GO:0055114(oxidation-reduction process)	NA	NA	NA
2	ENSDARG00000021669	sec61a1	2.6894	1.56937	0.777104	0.85	0.414	0	0	Sec61 translocon alpha 1 subunit [Source:ZFIN;Acc:ZDB-GENE-020418-2]	GO:0005048(signal sequence binding);GO:0005783(endoplasmic reticulum);GO:0005784(Sec61 translocon complex);GO:0005789(endoplasmic reticulum membrane);GO:0006616(SRP-dependent cotranslational protein targeting to membrane, translocation);GO:0006620(posttranslational protein targeting to endoplasmic reticulum membrane);GO:0007275(multicellular organism development);GO:0008320(protein transmembrane …	03060(Protein export);04141(Protein processing in endoplasmic reticulum);04145(Phagosome)	K10956	NA
2	ENSDARG00000100588	rpl36	22.1003	14.4937	0.608636	0.999	0.962	0	1.54508e-306	ribosomal protein L36 [Source:ZFIN;Acc:ZDB-GENE-040622-2]	GO:0002181(cytoplasmic translation);GO:0003735(structural constituent of ribosome);GO:0005622(intracellular);GO:0005737(cytoplasm);GO:0005829(cytosol);GO:0005840(ribosome);GO:0006412(translation);GO:0007420(brain development);GO:0022625(cytosolic large ribosomal subunit);GO:0051726(regulation of cell cycle)	03010(Ribosome)	K02920	NA
2	ENSDARG00000003032	eif4a1b	2.22849	1.38911	0.681906	0.834	0.391	3.07612e-306	8.52454e-302	eukaryotic translation initiation factor 4A1B [Source:ZFIN;Acc:ZDB-GENE-040120-6]	GO:0000166(nucleotide binding);GO:0003676(nucleic acid binding);GO:0003743(translation initiation factor activity);GO:0004004(ATP-dependent RNA helicase activity);GO:0004386(helicase activity);GO:0005524(ATP binding);GO:0006413(translational initiation);GO:0016787(hydrolase activity)	03013(RNA transport)	K03257	NA
2	ENSDARG00000099439	serp1	2.04624	1.22316	0.742366	0.745	0.298	1.94958e-305	5.40269e-301	stress-associated endoplasmic reticulum protein 1 [Source:ZFIN;Acc:ZDB-GENE-030131-8741]	GO:0005783(endoplasmic reticulum);GO:0005789(endoplasmic reticulum membrane);GO:0006486(protein glycosylation);GO:0015031(protein transport);GO:0016020(membrane);GO:0016021(integral component of membrane);GO:0030968(endoplasmic reticulum unfolded protein response)	NA	NA	NA
2	ENSDARG00000037071	rps26	14.7152	9.20644	0.676589	0.998	0.921	2.70753e-305	7.50311e-301	ribosomal protein S26 [Source:ZFIN;Acc:ZDB-GENE-030131-8606]	GO:0003729(mRNA binding);GO:0003735(structural constituent of ribosome);GO:0005622(intracellular);GO:0005840(ribosome);GO:0006412(translation);GO:0022627(cytosolic small ribosomal subunit)	03010(Ribosome)	K02976	NA
2	ENSDARG00000055868	rsl1d1	1.86366	1.12564	0.727394	0.717	0.273	1.162e-304	3.22012e-300	ribosomal L1 domain containing 1 [Source:ZFIN;Acc:ZDB-GENE-130603-67]	GO:0000470(maturation of LSU-rRNA);GO:0003723(RNA binding);GO:0030686(90S preribosome)	NA	K14775	NA
2	ENSDARG00000006413	rpl38	20.9074	13.8921	0.589746	1	0.96	5.86556e-300	1.62546e-295	ribosomal protein L38 [Source:ZFIN;Acc:ZDB-GENE-030131-8752]	GO:0003735(structural constituent of ribosome);GO:0005622(intracellular);GO:0005840(ribosome);GO:0006412(translation);GO:0022625(cytosolic large ribosomal subunit);GO:0043009(chordate embryonic development)	03010(Ribosome)	K02923	NA
2	ENSDARG00000010194	eif4bb	0.864697	0.660683	0.388237	0.583	0.206	5.66179e-298	1.569e-293	eukaryotic translation initiation factor 4Bb [Source:ZFIN;Acc:ZDB-GENE-030131-8563]	GO:0001731(formation of translation preinitiation complex);GO:0002181(cytoplasmic translation);GO:0003676(nucleic acid binding);GO:0003723(RNA binding);GO:0003743(translation initiation factor activity);GO:0005844(polysome);GO:0006413(translational initiation);GO:0033592(RNA strand annealing activity);GO:0034057(RNA strand-exchange activity);GO:0043024(ribosomal small subunit binding);GO:0097010(…	03013(RNA transport);04150(mTOR signaling pathway)	K03258	NA
2	ENSDARG00000007385	cct7	1.44399	1.02257	0.497866	0.737	0.313	1.95931e-296	5.42963e-292	chaperonin containing TCP1, subunit 7 (eta) [Source:ZFIN;Acc:ZDB-GENE-020419-7]	GO:0000166(nucleotide binding);GO:0005524(ATP binding);GO:0005737(cytoplasm);GO:0005832(chaperonin-containing T-complex);GO:0006457(protein folding);GO:0051082(unfolded protein binding)	NA	K09499	NA
2	ENSDARG00000063626	ddx21	1.88274	1.20453	0.644363	0.752	0.312	5.34476e-296	1.48114e-291	DEAD (Asp-Glu-Ala-Asp) box helicase 21 [Source:ZFIN;Acc:ZDB-GENE-031113-10]	GO:0003676(nucleic acid binding);GO:0003723(RNA binding);GO:0004386(helicase activity);GO:0005524(ATP binding);GO:0005634(nucleus)	NA	K16911	EC:3.6.4.13
2	ENSDARG00000004757	ybx1	14.8765	10.5797	0.491744	1	0.951	8.35762e-291	2.31606e-286	Y box binding protein 1 [Source:ZFIN;Acc:ZDB-GENE-000629-3]	GO:0003676(nucleic acid binding);GO:0003723(RNA binding);GO:0005634(nucleus);GO:0008190(eukaryotic initiation factor 4E binding);GO:0045947(negative regulation of translational initiation);GO:0048025(negative regulation of mRNA splicing, via spliceosome);GO:0050686(negative regulation of mRNA processing);GO:0051236(establishment of RNA localization);GO:1900364(negative regulation of mRNA polyaden…	NA	K09276	NA
2	ENSDARG00000012820	nop56	1.41767	0.931872	0.605321	0.668	0.244	1.12749e-290	3.1245e-286	NOP56 ribonucleoprotein homolog [Source:ZFIN;Acc:ZDB-GENE-040109-1]	GO:0007507(heart development);GO:0030515(snoRNA binding);GO:0031428(box C/D snoRNP complex);GO:0032040(small-subunit processome)	03008(Ribosome biogenesis in eukaryotes)	K14564	NA
2	ENSDARG00000017772	mdh1aa	1.39144	1.07099	0.377633	0.728	0.333	3.48546e-288	9.65891e-284	malate dehydrogenase 1Aa, NAD (soluble) [Source:ZFIN;Acc:ZDB-GENE-040204-1]	GO:0003824(catalytic activity);GO:0005829(cytosol);GO:0005975(carbohydrate metabolic process);GO:0006099(tricarboxylic acid cycle);GO:0006107(oxaloacetate metabolic process);GO:0006108(malate metabolic process);GO:0006734(NADH metabolic process);GO:0016491(oxidoreductase activity);GO:0016615(malate dehydrogenase activity);GO:0016616(oxidoreductase activity, acting on the CH-OH group of donors, NA…	00020(Citrate cycle (TCA cycle));00270(Cysteine and methionine metabolism);00620(Pyruvate metabolism);00630(Glyoxylate and dicarboxylate metabolism)	K00025	EC:1.1.1.37
2	ENSDARG00000006766	snd1	1.07432	0.758537	0.502139	0.623	0.221	4.61344e-283	1.27848e-278	staphylococcal nuclease and tudor domain containing 1 [Source:ZFIN;Acc:ZDB-GENE-030131-3124]	GO:0003676(nucleic acid binding);GO:0003723(RNA binding);GO:0004518(nuclease activity);GO:0004521(endoribonuclease activity);GO:0005634(nucleus);GO:0005737(cytoplasm);GO:0006401(RNA catabolic process);GO:0016442(RISC complex);GO:0031047(gene silencing by RNA);GO:0090305(nucleic acid phosphodiester bond hydrolysis);GO:0090502(RNA phosphodiester bond hydrolysis, endonucleolytic)	NA	NA	NA
2	ENSDARG00000059908	si:ch211-217k17.7	0.83455	0.645049	0.371589	0.514	0.17	6.52919e-278	1.80937e-273	si:ch211-217k17.7 [Source:ZFIN;Acc:ZDB-GENE-061009-11]	NA	NA	K14822	NA
2	ENSDARG00000102317	rpl26	1.71649	1.14362	0.585852	0.765	0.339	4.39633e-277	1.21831e-272	ribosomal protein L26 [Source:ZFIN;Acc:ZDB-GENE-040426-2117]	GO:0002181(cytoplasmic translation);GO:0003723(RNA binding);GO:0003735(structural constituent of ribosome);GO:0005622(intracellular);GO:0005840(ribosome);GO:0006412(translation);GO:0007634(optokinetic behavior);GO:0015934(large ribosomal subunit);GO:0022625(cytosolic large ribosomal subunit);GO:0042273(ribosomal large subunit biogenesis);GO:0055085(transmembrane transport);GO:0060059(embryonic re…	03010(Ribosome)	K02898	NA
2	ENSDARG00000017891	tcp1	1.20698	0.922323	0.388056	0.683	0.299	8.21528e-274	2.27662e-269	t-complex 1 [Source:ZFIN;Acc:ZDB-GENE-990714-24]	GO:0000166(nucleotide binding);GO:0005524(ATP binding);GO:0005737(cytoplasm);GO:0005832(chaperonin-containing T-complex);GO:0006457(protein folding);GO:0051082(unfolded protein binding);GO:0070121(Kupffer's vesicle development)	NA	K09493	NA
2	ENSDARG00000043848	sod1	2.37513	1.81066	0.391487	0.883	0.502	5.0852e-273	1.40921e-268	superoxide dismutase 1, soluble [Source:ZFIN;Acc:ZDB-GENE-990415-258]	GO:0004784(superoxide dismutase activity);GO:0005507(copper ion binding);GO:0005634(nucleus);GO:0005737(cytoplasm);GO:0005739(mitochondrion);GO:0005829(cytosol);GO:0006801(superoxide metabolic process);GO:0009410(response to xenobiotic stimulus);GO:0010038(response to metal ion);GO:0016209(antioxidant activity);GO:0016491(oxidoreductase activity);GO:0019430(removal of superoxide radicals);GO:0046…	04146(Peroxisome)	K04565	EC:1.15.1.1
2	ENSDARG00000105116	p4hb	1.94003	1.35057	0.522507	0.787	0.372	5.7131e-272	1.58321e-267	prolyl 4-hydroxylase, beta polypeptide [Source:ZFIN;Acc:ZDB-GENE-080610-1]	GO:0003756(protein disulfide isomerase activity);GO:0005783(endoplasmic reticulum);GO:0006457(protein folding);GO:0016853(isomerase activity);GO:0034976(response to endoplasmic reticulum stress);GO:0045454(cell redox homeostasis)	04141(Protein processing in endoplasmic reticulum)	K09580	EC:5.3.4.1
2	ENSDARG00000005191	ahcy	0.882951	0.59943	0.558742	0.532	0.151	6.23355e-272	1.72744e-267	adenosylhomocysteinase [Source:ZFIN;Acc:ZDB-GENE-031219-6]	GO:0004013(adenosylhomocysteinase activity);GO:0005829(cytosol);GO:0006730(one-carbon metabolic process);GO:0016787(hydrolase activity);GO:0019510(S-adenosylhomocysteine catabolic process);GO:0033353(S-adenosylmethionine cycle);GO:0051287(NAD binding)	00270(Cysteine and methionine metabolism)	K01251	EC:3.3.1.1
2	ENSDARG00000044129	si:ch211-214p16.1	1.18791	0.683381	0.797665	0.421	0.084	3.67363e-271	1.01804e-266	si:ch211-214p16.1 [Source:NCBI gene;Acc:368901]	NA	NA	NA	NA
2	ENSDARG00000069013	prdx4	0.996852	0.777446	0.358637	0.633	0.262	3.9513e-270	1.09498e-265	peroxiredoxin 4 [Source:ZFIN;Acc:ZDB-GENE-030131-1096]	GO:0005783(endoplasmic reticulum);GO:0005829(cytosol);GO:0006979(response to oxidative stress);GO:0008379(thioredoxin peroxidase activity);GO:0016209(antioxidant activity);GO:0016491(oxidoreductase activity);GO:0042744(hydrogen peroxide catabolic process);GO:0045454(cell redox homeostasis);GO:0051920(peroxiredoxin activity);GO:0055114(oxidation-reduction process);GO:0098869(cellular oxidant detox…	NA	K03386	EC:1.11.1.15
2	ENSDARG00000014329	npm1a	0.938658	0.612686	0.615451	0.471	0.116	1.5717e-269	4.35549e-265	nucleophosmin 1a [Source:ZFIN;Acc:ZDB-GENE-021028-1]	GO:0003676(nucleic acid binding);GO:0003682(chromatin binding);GO:0005654(nucleoplasm);GO:0005730(nucleolus);GO:0005737(cytoplasm);GO:0006338(chromatin remodeling);GO:0030097(hemopoiesis);GO:0042393(histone binding);GO:0042981(regulation of apoptotic process)	NA	K11276	NA
2	ENSDARG00000069100	aldh9a1a.1	3.13006	1.91272	0.710567	0.871	0.481	5.04401e-269	1.3978e-264	aldehyde dehydrogenase 9 family, member A1a, tandem duplicate 1 [Source:ZFIN;Acc:ZDB-GENE-030131-1257]	GO:0004029(aldehyde dehydrogenase (NAD) activity);GO:0005737(cytoplasm);GO:0016491(oxidoreductase activity);GO:0016620(oxidoreductase activity, acting on the aldehyde or oxo group of donors, NAD or NADP as acceptor);GO:0019145(aminobutyraldehyde dehydrogenase activity);GO:0043878(glyceraldehyde-3-phosphate dehydrogenase (NAD+) (non-phosphorylating) activity);GO:0047105(4-trimethylammoniobutyralde…	00010(Glycolysis / Gluconeogenesis);00053(Ascorbate and aldarate metabolism);00071(Fatty acid degradation);00280(Valine, leucine and isoleucine degradation);00310(Lysine degradation);00330(Arginine and proline metabolism);00340(Histidine metabolism);00380(Tryptophan metabolism);00410(beta-Alanine metabolism);00561(Glycerolipid metabolism);00620(Pyruvate metabolism)	K00149	1.2.1.3;EC:1.2.1.47
2	ENSDARG00000101082	eif3s6ip	1.45224	1.10733	0.39119	0.729	0.341	1.15672e-266	3.20551e-262	eukaryotic translation initiation factor 3, subunit 6 interacting protein [Source:ZFIN;Acc:ZDB-GENE-040426-2138]	GO:0001732(formation of cytoplasmic translation initiation complex);GO:0002183(cytoplasmic translational initiation);GO:0003743(translation initiation factor activity);GO:0005515(protein binding);GO:0005737(cytoplasm);GO:0005852(eukaryotic translation initiation factor 3 complex);GO:0006412(translation);GO:0006413(translational initiation);GO:0016282(eukaryotic 43S preinitiation complex);GO:00332…	NA	K15029	NA
2	ENSDARG00000013475	cct4	2.1495	1.44807	0.569869	0.828	0.415	2.31649e-266	6.41945e-262	chaperonin containing TCP1, subunit 4 (delta) [Source:ZFIN;Acc:ZDB-GENE-040426-1421]	GO:0000166(nucleotide binding);GO:0001666(response to hypoxia);GO:0005524(ATP binding);GO:0005737(cytoplasm);GO:0005832(chaperonin-containing T-complex);GO:0006457(protein folding);GO:0051082(unfolded protein binding)	NA	K09496	NA
2	ENSDARG00000008502	pno1	1.09631	0.795663	0.462427	0.618	0.234	8.76753e-265	2.42966e-260	partner of NOB1 homolog [Source:ZFIN;Acc:ZDB-GENE-040426-1419]	GO:0003676(nucleic acid binding);GO:0003723(RNA binding)	NA	K11884	NA
2	ENSDARG00000052178	eif2s1b	1.68085	1.1716	0.520707	0.766	0.357	9.12878e-261	2.52977e-256	eukaryotic translation initiation factor 2, subunit 1 alpha b [Source:ZFIN;Acc:ZDB-GENE-030131-283]	GO:0003676(nucleic acid binding);GO:0003723(RNA binding);GO:0003743(translation initiation factor activity);GO:0005737(cytoplasm);GO:0005850(eukaryotic translation initiation factor 2 complex);GO:0005851(eukaryotic translation initiation factor 2B complex);GO:0006413(translational initiation);GO:0033290(eukaryotic 48S preinitiation complex);GO:0043022(ribosome binding);GO:0043614(multi-eIF comple…	03013(RNA transport);04140(Autophagy - animal);04141(Protein processing in endoplasmic reticulum);04210(Apoptosis);05168(Herpes simplex virus 1 infection)	K03237	NA
2	ENSDARG00000026369	dbi	7.91064	5.07077	0.64159	0.984	0.705	2.60367e-260	7.21528e-256	diazepam binding inhibitor (GABA receptor modulator, acyl-CoA binding protein) [Source:ZFIN;Acc:ZDB-GENE-040426-1861]	GO:0000062(fatty-acyl-CoA binding);GO:0005575(cellular_component);GO:0008150(biological_process)	03320(PPAR signaling pathway)	K08762	NA
2	ENSDARG00000009830	hdlbpa	1.44266	1.02403	0.494477	0.697	0.298	2.62378e-260	7.27101e-256	high density lipoprotein binding protein a [Source:ZFIN;Acc:ZDB-GENE-030131-2032]	GO:0003676(nucleic acid binding);GO:0003723(RNA binding);GO:0071391(cellular response to estrogen stimulus)	NA	NA	NA
2	ENSDARG00000017235	eif5a	3.55812	2.26757	0.649969	0.918	0.558	2.4202e-258	6.70685e-254	eukaryotic translation initiation factor 5A [Source:ZFIN;Acc:ZDB-GENE-040426-2229]	GO:0003723(RNA binding);GO:0003743(translation initiation factor activity);GO:0003746(translation elongation factor activity);GO:0006412(translation);GO:0006413(translational initiation);GO:0006452(translational frameshifting);GO:0043022(ribosome binding);GO:0045901(positive regulation of translational elongation);GO:0045905(positive regulation of translational termination)	NA	K03263	NA
2	ENSDARG00000035860	rps28	20.3756	13.6309	0.579962	0.999	0.963	2.91903e-256	8.0892e-252	ribosomal protein S28 [Source:ZFIN;Acc:ZDB-GENE-030131-2022]	GO:0000028(ribosomal small subunit assembly);GO:0002181(cytoplasmic translation);GO:0003735(structural constituent of ribosome);GO:0005622(intracellular);GO:0005737(cytoplasm);GO:0005783(endoplasmic reticulum);GO:0005791(rough endoplasmic reticulum);GO:0005829(cytosol);GO:0005840(ribosome);GO:0006412(translation);GO:0022627(cytosolic small ribosomal subunit);GO:0030490(maturation of SSU-rRNA);GO:…	03010(Ribosome)	K02979	NA
2	ENSDARG00000054588	cox6a2	4.40994	2.9012	0.604107	0.928	0.563	6.23214e-255	1.72705e-250	cytochrome c oxidase subunit 6A2 [Source:ZFIN;Acc:ZDB-GENE-040912-129]	GO:0004129(cytochrome-c oxidase activity);GO:0005739(mitochondrion);GO:0005743(mitochondrial inner membrane);GO:0005751(mitochondrial respiratory chain complex IV);GO:0006123(mitochondrial electron transport, cytochrome c to oxygen);GO:0009060(aerobic respiration);GO:0016020(membrane);GO:0030234(enzyme regulator activity);GO:0050790(regulation of catalytic activity);GO:1902600(proton transmembran…	00190(Oxidative phosphorylation);04260(Cardiac muscle contraction)	K02266	NA
2	ENSDARG00000011125	snrpb	1.1116	0.908556	0.290994	0.65	0.304	1.25105e-252	3.46692e-248	small nuclear ribonucleoprotein polypeptides B and B1 [Source:ZFIN;Acc:ZDB-GENE-040426-1819]	GO:0000398(mRNA splicing, via spliceosome);GO:0003723(RNA binding);GO:0005634(nucleus);GO:0005682(U5 snRNP);GO:0005685(U1 snRNP);GO:0005686(U2 snRNP);GO:0005687(U4 snRNP);GO:0005737(cytoplasm);GO:0046540(U4/U6 x U5 tri-snRNP complex);GO:0071004(U2-type prespliceosome);GO:0071013(catalytic step 2 spliceosome)	03040(Spliceosome)	K11086	NA
2	ENSDARG00000030949	srprb	0.834702	0.689747	0.275194	0.547	0.224	2.79936e-250	7.75758e-246	SRP receptor subunit beta [Source:ZFIN;Acc:ZDB-GENE-040718-311]	GO:0005525(GTP binding);GO:0016020(membrane);GO:0016021(integral component of membrane)	03060(Protein export)	K12272	NA
2	ENSDARG00000078785	tmem258	2.27854	1.70465	0.418636	0.852	0.483	3.9962e-248	1.10743e-243	transmembrane protein 258 [Source:ZFIN;Acc:ZDB-GENE-040426-1739]	GO:0003674(molecular_function);GO:0005783(endoplasmic reticulum);GO:0006486(protein glycosylation);GO:0006487(protein N-linked glycosylation);GO:0016020(membrane);GO:0016021(integral component of membrane);GO:0034998(oligosaccharyltransferase I complex)	NA	NA	NA
2	ENSDARG00000026629	gmds	1.27061	0.947359	0.423537	0.664	0.288	2.47955e-246	6.87134e-242	GDP-mannose 4,6-dehydratase [Source:ZFIN;Acc:ZDB-GENE-050419-45]	GO:0005575(cellular_component);GO:0005737(cytoplasm);GO:0007219(Notch signaling pathway);GO:0008417(fucosyltransferase activity);GO:0008446(GDP-mannose 4,6-dehydratase activity);GO:0010842(retina layer formation);GO:0019673(GDP-mannose metabolic process);GO:0021564(vagus nerve development);GO:0021744(dorsal motor nucleus of vagus nerve development);GO:0036065(fucosylation);GO:0042351('de novo' GD…	00051(Fructose and mannose metabolism);00520(Amino sugar and nucleotide sugar metabolism)	K01711	EC:4.2.1.47
2	ENSDARG00000042533	gstm.1	0.750656	0.591383	0.34406	0.513	0.185	8.56356e-246	2.37313e-241	glutathione S-transferase mu, tandem duplicate 1 [Source:ZFIN;Acc:ZDB-GENE-030911-2]	GO:0004364(glutathione transferase activity);GO:0005515(protein binding)	00480(Glutathione metabolism);00980(Metabolism of xenobiotics by cytochrome P450);00982(Drug metabolism - cytochrome P450);00983(Drug metabolism - other enzymes)	K00799	EC:2.5.1.18
2	ENSDARG00000102452	eif3ha	2.25707	1.65674	0.446103	0.862	0.482	1.25665e-243	3.48243e-239	eukaryotic translation initiation factor 3, subunit H, a [Source:ZFIN;Acc:ZDB-GENE-040808-19]	GO:0001732(formation of cytoplasmic translation initiation complex);GO:0001944(vasculature development);GO:0002183(cytoplasmic translational initiation);GO:0003743(translation initiation factor activity);GO:0005515(protein binding);GO:0005737(cytoplasm);GO:0005829(cytosol);GO:0005852(eukaryotic translation initiation factor 3 complex);GO:0006412(translation);GO:0006413(translational initiation);G…	03013(RNA transport)	K03247	NA
2	ENSDARG00000006200	eif4g1a	0.853672	0.712	0.261805	0.531	0.221	5.1159e-242	1.41772e-237	eukaryotic translation initiation factor 4 gamma, 1a [Source:ZFIN;Acc:ZDB-GENE-070112-702]	GO:0003723(RNA binding);GO:0003729(mRNA binding);GO:0003743(translation initiation factor activity);GO:0005515(protein binding);GO:0005575(cellular_component);GO:0006413(translational initiation);GO:0016281(eukaryotic translation initiation factor 4F complex)	03013(RNA transport)	K03260	NA
2	ENSDARG00000034368	hexb	1.32544	1.10506	0.262345	0.701	0.356	1.32083e-241	3.66028e-237	hexosaminidase B (beta polypeptide) [Source:ZFIN;Acc:ZDB-GENE-030131-2333]	GO:0001525(angiogenesis);GO:0004553(hydrolase activity, hydrolyzing O-glycosyl compounds);GO:0004563(beta-N-acetylhexosaminidase activity);GO:0005975(carbohydrate metabolic process);GO:0008152(metabolic process);GO:0016787(hydrolase activity);GO:0016798(hydrolase activity, acting on glycosyl bonds);GO:0102148(N-acetyl-beta-D-galactosaminidase activity)	00511(Other glycan degradation);00520(Amino sugar and nucleotide sugar metabolism);00531(Glycosaminoglycan degradation);00603(Glycosphingolipid biosynthesis - globo and isoglobo series);00604(Glycosphingolipid biosynthesis - ganglio series);04142(Lysosome)	K12373	EC:3.2.1.52
2	ENSDARG00000003795	idh2	1.99405	1.4744	0.435578	0.812	0.432	1.33567e-241	3.70142e-237	isocitrate dehydrogenase 2 (NADP+), mitochondrial [Source:ZFIN;Acc:ZDB-GENE-031118-95]	GO:0000287(magnesium ion binding);GO:0004450(isocitrate dehydrogenase (NADP+) activity);GO:0006102(isocitrate metabolic process);GO:0016616(oxidoreductase activity, acting on the CH-OH group of donors, NAD or NADP as acceptor);GO:0051287(NAD binding);GO:0055114(oxidation-reduction process)	00020(Citrate cycle (TCA cycle));00480(Glutathione metabolism);04146(Peroxisome)	K00031	EC:1.1.1.42
2	ENSDARG00000077717	rpl29	14.3789	9.66646	0.572892	0.998	0.935	2.47702e-238	6.86431e-234	ribosomal protein L29 [Source:ZFIN;Acc:ZDB-GENE-040801-167]	GO:0002181(cytoplasmic translation);GO:0003735(structural constituent of ribosome);GO:0005622(intracellular);GO:0005840(ribosome);GO:0006412(translation);GO:0022625(cytosolic large ribosomal subunit)	03010(Ribosome)	K02905	NA
2	ENSDARG00000016173	cct3	1.54401	1.21187	0.349448	0.753	0.389	3.2955e-236	9.13249e-232	chaperonin containing TCP1, subunit 3 (gamma) [Source:ZFIN;Acc:ZDB-GENE-020419-5]	GO:0000166(nucleotide binding);GO:0005524(ATP binding);GO:0005737(cytoplasm);GO:0005832(chaperonin-containing T-complex);GO:0006457(protein folding);GO:0046671(negative regulation of retinal cell programmed cell death);GO:0048048(embryonic eye morphogenesis);GO:0051082(unfolded protein binding)	NA	K09495	NA
2	ENSDARG00000056200	abcb9	2.40598	1.80791	0.412301	0.807	0.436	1.71384e-234	4.74939e-230	ATP-binding cassette, sub-family B (MDR/TAP), member 9 [Source:ZFIN;Acc:ZDB-GENE-050517-12]	GO:0000166(nucleotide binding);GO:0005524(ATP binding);GO:0005765(lysosomal membrane);GO:0015440(peptide-transporting ATPase activity);GO:0015833(peptide transport);GO:0016020(membrane);GO:0016021(integral component of membrane);GO:0016887(ATPase activity);GO:0042626(ATPase activity, coupled to transmembrane movement of substances);GO:0055085(transmembrane transport);GO:1904680(peptide transmembr…	02010(ABC transporters);04142(Lysosome)	K05656	NA
2	ENSDARG00000018961	gtpbp4	2.49816	1.66884	0.582019	0.815	0.428	9.48266e-234	2.62783e-229	GTP binding protein 4 [Source:ZFIN;Acc:ZDB-GENE-030131-5982]	GO:0005525(GTP binding);GO:0005634(nucleus);GO:0005730(nucleolus);GO:0042254(ribosome biogenesis)	03008(Ribosome biogenesis in eukaryotes)	K06943	NA
2	ENSDARG00000104674	cct2.1	2.42013	1.73371	0.481222	0.865	0.491	2.29491e-233	6.35966e-229	chaperonin containing TCP1, subunit 2 (beta) [Source:ZFIN;Acc:ZDB-GENE-020419-6]	GO:0000166(nucleotide binding);GO:0005524(ATP binding);GO:0005832(chaperonin-containing T-complex);GO:0006457(protein folding);GO:0032402(melanosome transport);GO:0051082(unfolded protein binding);GO:0070121(Kupffer's vesicle development)	NA	K09494	NA
2	ENSDARG00000103682	si:dkey-23i12.5	1.00942	0.725148	0.477184	0.548	0.196	3.54248e-233	9.81693e-229	si:dkey-23i12.5 [Source:NCBI gene;Acc:325112]	NA	NA	NA	NA
2	ENSDARG00000102105	dad1	2.57728	1.87351	0.460108	0.859	0.497	3.51441e-231	9.73913e-227	defender against cell death 1 [Source:ZFIN;Acc:ZDB-GENE-060503-233]	GO:0004576(oligosaccharyl transferase activity);GO:0004579(dolichyl-diphosphooligosaccharide-protein glycotransferase activity);GO:0005783(endoplasmic reticulum);GO:0005789(endoplasmic reticulum membrane);GO:0006486(protein glycosylation);GO:0006487(protein N-linked glycosylation);GO:0008250(oligosaccharyltransferase complex);GO:0016020(membrane);GO:0016021(integral component of membrane)	00510(N-Glycan biosynthesis);04141(Protein processing in endoplasmic reticulum)	K12668	NA
2	ENSDARG00000021252	cct6a	2.15548	1.70242	0.340423	0.857	0.502	8.55712e-231	2.37135e-226	chaperonin containing TCP1, subunit 6A (zeta 1) [Source:ZFIN;Acc:ZDB-GENE-011018-2]	GO:0000166(nucleotide binding);GO:0005524(ATP binding);GO:0005737(cytoplasm);GO:0005832(chaperonin-containing T-complex);GO:0006457(protein folding);GO:0051082(unfolded protein binding)	NA	K09498	NA
2	ENSDARG00000101813	nap1l1	0.754359	0.60651	0.314719	0.504	0.191	8.2315e-230	2.28111e-225	nucleosome assembly protein 1-like 1 [Source:ZFIN;Acc:ZDB-GENE-030516-2]	GO:0001878(response to yeast);GO:0005634(nucleus);GO:0006334(nucleosome assembly)	NA	K11279	NA
2	ENSDARG00000090697	eif3ea	3.96235	2.6421	0.584668	0.944	0.638	7.08484e-229	1.96335e-224	eukaryotic translation initiation factor 3, subunit E, a [Source:ZFIN;Acc:ZDB-GENE-030131-3827]	GO:0001732(formation of cytoplasmic translation initiation complex);GO:0002183(cytoplasmic translational initiation);GO:0003743(translation initiation factor activity);GO:0005634(nucleus);GO:0005737(cytoplasm);GO:0005852(eukaryotic translation initiation factor 3 complex);GO:0006412(translation);GO:0006413(translational initiation);GO:0016282(eukaryotic 43S preinitiation complex);GO:0033290(eukar…	03013(RNA transport)	K03250	NA
2	ENSDARG00000043257	ckbb	0.991899	0.74398	0.414928	0.494	0.17	5.01132e-228	1.38874e-223	creatine kinase, brain b [Source:ZFIN;Acc:ZDB-GENE-020103-2]	GO:0000166(nucleotide binding);GO:0003824(catalytic activity);GO:0004111(creatine kinase activity);GO:0005524(ATP binding);GO:0016301(kinase activity);GO:0016310(phosphorylation);GO:0016740(transferase activity);GO:0016772(transferase activity, transferring phosphorus-containing groups)	00330(Arginine and proline metabolism)	K00933	EC:2.7.3.2
2	ENSDARG00000017445	eif3i	2.17509	1.74845	0.315001	0.861	0.513	2.42328e-226	6.71539e-222	eukaryotic translation initiation factor 3, subunit I [Source:ZFIN;Acc:ZDB-GENE-040426-1922]	GO:0001732(formation of cytoplasmic translation initiation complex);GO:0001889(liver development);GO:0002040(sprouting angiogenesis);GO:0002183(cytoplasmic translational initiation);GO:0003743(translation initiation factor activity);GO:0005515(protein binding);GO:0005737(cytoplasm);GO:0005852(eukaryotic translation initiation factor 3 complex);GO:0006412(translation);GO:0006413(translational init…	03013(RNA transport)	K03246	NA
2	ENSDARG00000104353	nop58	0.511221	0.394652	0.373368	0.355	0.081	3.24418e-226	8.99026e-222	NOP58 ribonucleoprotein homolog (yeast) [Source:ZFIN;Acc:ZDB-GENE-040426-2140]	GO:0030515(snoRNA binding);GO:0031428(box C/D snoRNP complex);GO:0032040(small-subunit processome)	03008(Ribosome biogenesis in eukaryotes)	K14565	NA
2	ENSDARG00000005821	ncf2	2.79546	2.08981	0.419717	0.882	0.527	9.50906e-225	2.63515e-220	neutrophil cytosolic factor 2 [Source:ZFIN;Acc:ZDB-GENE-070209-29]	GO:0005515(protein binding);GO:0006909(phagocytosis);GO:0016176(superoxide-generating NADPH oxidase activator activity);GO:0043020(NADPH oxidase complex);GO:0043085(positive regulation of catalytic activity);GO:0045730(respiratory burst)	04145(Phagosome)	K08010	NA
2	ENSDARG00000026908	tmed2	1.83218	1.5264	0.263424	0.808	0.475	1.7728e-224	4.91278e-220	transmembrane p24 trafficking protein 2 [Source:ZFIN;Acc:ZDB-GENE-030131-269]	GO:0005783(endoplasmic reticulum);GO:0005793(endoplasmic reticulum-Golgi intermediate compartment);GO:0005794(Golgi apparatus);GO:0006886(intracellular protein transport);GO:0006888(endoplasmic reticulum to Golgi vesicle-mediated transport);GO:0007030(Golgi organization);GO:0016020(membrane);GO:0016021(integral component of membrane);GO:0030134(COPII-coated ER to Golgi transport vesicle)	NA	K20347	NA
2	ENSDARG00000014499	nutf2l	0.644288	0.532257	0.275581	0.465	0.175	1.01768e-219	2.8202e-215	nuclear transport factor 2, like [Source:ZFIN;Acc:ZDB-GENE-020416-1]	GO:0006606(protein import into nucleus);GO:0006913(nucleocytoplasmic transport);GO:0008565(protein transporter activity);GO:0044613(nuclear pore central transport channel)	NA	NA	NA
2	ENSDARG00000032327	usp36	1.24927	1.00958	0.307327	0.638	0.305	1.35212e-215	3.74698e-211	ubiquitin specific peptidase 36 [Source:ZFIN;Acc:ZDB-GENE-030131-5450]	GO:0004197(cysteine-type endopeptidase activity);GO:0004843(thiol-dependent ubiquitin-specific protease activity);GO:0006511(ubiquitin-dependent protein catabolic process);GO:0016579(protein deubiquitination);GO:0036459(thiol-dependent ubiquitinyl hydrolase activity);GO:0042981(regulation of apoptotic process);GO:1904888(cranial skeletal system development)	NA	K11855	EC:3.4.19.12
2	ENSDARG00000052842	ppifb	1.95498	1.6043	0.285206	0.827	0.493	1.70142e-214	4.71497e-210	peptidylprolyl isomerase Fb [Source:ZFIN;Acc:ZDB-GENE-051030-126]	GO:0000413(protein peptidyl-prolyl isomerization);GO:0003755(peptidyl-prolyl cis-trans isomerase activity);GO:0005739(mitochondrion);GO:0006457(protein folding);GO:0016018(cyclosporin A binding);GO:0016853(isomerase activity);GO:0042026(protein refolding);GO:0046902(regulation of mitochondrial membrane permeability);GO:0051082(unfolded protein binding);GO:0070301(cellular response to hydrogen per…	04020(Calcium signaling pathway)	K09565	EC:5.2.1.8
2	ENSDARG00000045305	pde7a	1.30768	1.03544	0.336756	0.657	0.318	1.47707e-213	4.09326e-209	phosphodiesterase 7A [Source:ZFIN;Acc:ZDB-GENE-031222-10]	GO:0004114(3',5'-cyclic-nucleotide phosphodiesterase activity);GO:0004115(3',5'-cyclic-AMP phosphodiesterase activity);GO:0007165(signal transduction);GO:0008081(phosphoric diester hydrolase activity);GO:0016787(hydrolase activity);GO:0046872(metal ion binding)	00230(Purine metabolism)	K18436	EC:3.1.4.53
2	ENSDARG00000053624	csf1rb	0.367349	0.289214	0.345014	0.284	0.046	1.38237e-212	3.83082e-208	colony stimulating factor 1 receptor, b [Source:ZFIN;Acc:ZDB-GENE-091118-1]	GO:0000166(nucleotide binding);GO:0002244(hematopoietic progenitor cell differentiation);GO:0004672(protein kinase activity);GO:0004713(protein tyrosine kinase activity);GO:0004714(transmembrane receptor protein tyrosine kinase activity);GO:0005011(macrophage colony-stimulating factor receptor activity);GO:0005524(ATP binding);GO:0005887(integral component of plasma membrane);GO:0006468(protein p…	04010(MAPK signaling pathway);04060(Cytokine-cytokine receptor interaction)	K05090	EC:2.7.10.1
2	ENSDARG00000037488	canx	0.759388	0.62718	0.275958	0.508	0.21	3.66128e-212	1.01461e-207	calnexin [Source:ZFIN;Acc:ZDB-GENE-040426-2797]	GO:0005509(calcium ion binding);GO:0005515(protein binding);GO:0005783(endoplasmic reticulum);GO:0006457(protein folding);GO:0016020(membrane);GO:0016021(integral component of membrane);GO:0048916(posterior lateral line development);GO:0051082(unfolded protein binding)	04141(Protein processing in endoplasmic reticulum);04145(Phagosome)	K08054	NA
2	ENSDARG00000040439	rsl24d1	11.9966	7.93352	0.596597	0.994	0.903	1.36728e-211	3.78901e-207	ribosomal L24 domain containing 1 [Source:ZFIN;Acc:ZDB-GENE-040426-1925]	GO:0000027(ribosomal large subunit assembly);GO:0003723(RNA binding);GO:0003735(structural constituent of ribosome);GO:0005634(nucleus);GO:0005730(nucleolus);GO:0006412(translation);GO:0022625(cytosolic large ribosomal subunit);GO:0042254(ribosome biogenesis);GO:1902626(assembly of large subunit precursor of preribosome)	03010(Ribosome)	K02896	NA
2	ENSDARG00000059323	rpn1	0.563063	0.469092	0.263425	0.434	0.158	3.69704e-211	1.02452e-206	ribophorin I [Source:ZFIN;Acc:ZDB-GENE-030131-4286]	GO:0004579(dolichyl-diphosphooligosaccharide-protein glycotransferase activity);GO:0005783(endoplasmic reticulum);GO:0005789(endoplasmic reticulum membrane);GO:0006486(protein glycosylation);GO:0016020(membrane);GO:0016021(integral component of membrane);GO:0018279(protein N-linked glycosylation via asparagine)	00510(N-Glycan biosynthesis);04141(Protein processing in endoplasmic reticulum)	K12666	NA
2	ENSDARG00000008155	sms	5.89755	4.68664	0.331562	0.962	0.67	2.77286e-209	7.68416e-205	spermine synthase [Source:ZFIN;Acc:ZDB-GENE-040625-150]	GO:0005575(cellular_component);GO:0006596(polyamine biosynthetic process);GO:0006597(spermine biosynthetic process);GO:0016740(transferase activity);GO:0016768(spermine synthase activity)	00270(Cysteine and methionine metabolism);00330(Arginine and proline metabolism);00410(beta-Alanine metabolism);00480(Glutathione metabolism)	K00802	EC:2.5.1.22
2	ENSDARG00000104227	nop10	0.310741	0.258592	0.265032	0.266	0.051	4.30762e-208	1.19373e-203	NOP10 ribonucleoprotein homolog (yeast) [Source:ZFIN;Acc:ZDB-GENE-041007-4]	GO:0001522(pseudouridine synthesis);GO:0005634(nucleus);GO:0005697(telomerase holoenzyme complex);GO:0005730(nucleolus);GO:0006364(rRNA processing);GO:0007004(telomere maintenance via telomerase);GO:0030515(snoRNA binding);GO:0031118(rRNA pseudouridine synthesis);GO:0031120(snRNA pseudouridine synthesis);GO:0031429(box H/ACA snoRNP complex);GO:0034513(box H/ACA snoRNA binding);GO:0042254(ribosome…	03008(Ribosome biogenesis in eukaryotes)	K11130	NA
2	ENSDARG00000070386	krtcap2	1.19565	0.916366	0.383805	0.634	0.296	4.28869e-205	1.18848e-200	keratinocyte associated protein 2 [Source:ZFIN;Acc:ZDB-GENE-060825-91]	GO:0003674(molecular_function);GO:0008150(biological_process);GO:0016020(membrane);GO:0016021(integral component of membrane)	NA	NA	NA
2	ENSDARG00000093022	selenoh	0.618473	0.454931	0.443064	0.403	0.108	3.10565e-204	8.60638e-200	selenoprotein H [Source:ZFIN;Acc:ZDB-GENE-030411-2]	GO:0000775(chromosome, centromeric region);GO:0000776(kinetochore);GO:0000777(condensed chromosome kinetochore);GO:0000786(nucleosome);GO:0001889(liver development);GO:0003677(DNA binding);GO:0005634(nucleus);GO:0005694(chromosome);GO:0005737(cytoplasm);GO:0005794(Golgi apparatus);GO:0031016(pancreas development);GO:0031492(nucleosomal DNA binding);GO:0045454(cell redox homeostasis);GO:0046982(pr…	NA	K11495	NA
2	ENSDARG00000009212	ppiaa	29.5606	24.4599	0.273257	1	0.99	8.89219e-204	2.4642e-199	peptidylprolyl isomerase Aa (cyclophilin A) [Source:ZFIN;Acc:ZDB-GENE-030131-8556]	GO:0000413(protein peptidyl-prolyl isomerization);GO:0003755(peptidyl-prolyl cis-trans isomerase activity);GO:0006457(protein folding);GO:0016018(cyclosporin A binding);GO:0016853(isomerase activity);GO:0042026(protein refolding);GO:0051082(unfolded protein binding)	04020(Calcium signaling pathway)	K09565	EC:5.2.1.8
2	ENSDARG00000038728	ch25hl2	2.17257	1.72844	0.329937	0.754	0.42	2.38651e-203	6.61348e-199	cholesterol 25-hydroxylase like 2 [Source:ZFIN;Acc:ZDB-GENE-080204-82]	GO:0000254(C-4 methylsterol oxidase activity);GO:0004497(monooxygenase activity);GO:0005506(iron ion binding);GO:0005783(endoplasmic reticulum);GO:0005789(endoplasmic reticulum membrane);GO:0006629(lipid metabolic process);GO:0006694(steroid biosynthetic process);GO:0008202(steroid metabolic process);GO:0008203(cholesterol metabolic process);GO:0008395(steroid hydroxylase activity);GO:0008610(lip…	00120(Primary bile acid biosynthesis)	K10223	EC:1.14.99.38
2	ENSDARG00000021257	eif3d	2.9097	2.33274	0.318843	0.92	0.61	2.72137e-198	7.54147e-194	eukaryotic translation initiation factor 3, subunit D [Source:ZFIN;Acc:ZDB-GENE-030131-8442]	GO:0001732(formation of cytoplasmic translation initiation complex);GO:0002183(cytoplasmic translational initiation);GO:0002191(cap-dependent translational initiation);GO:0003723(RNA binding);GO:0003743(translation initiation factor activity);GO:0005737(cytoplasm);GO:0005852(eukaryotic translation initiation factor 3 complex);GO:0006412(translation);GO:0006413(translational initiation);GO:0016282…	03013(RNA transport)	K03251	NA
2	ENSDARG00000092798	ppib	3.1059	2.33888	0.409192	0.902	0.586	1.32705e-197	3.67752e-193	peptidylprolyl isomerase B (cyclophilin B) [Source:ZFIN;Acc:ZDB-GENE-040426-1955]	GO:0000413(protein peptidyl-prolyl isomerization);GO:0003755(peptidyl-prolyl cis-trans isomerase activity);GO:0005518(collagen binding);GO:0005575(cellular_component);GO:0006457(protein folding);GO:0016018(cyclosporin A binding);GO:0016853(isomerase activity);GO:0042026(protein refolding);GO:0051082(unfolded protein binding)	NA	K03768	EC:5.2.1.8
2	ENSDARG00000008292	eif2s3	2.88457	2.1538	0.421476	0.901	0.575	2.78643e-196	7.72176e-192	eukaryotic translation initiation factor 2, subunit 3 gamma [Source:ZFIN;Acc:ZDB-GENE-030131-5552]	GO:0000166(nucleotide binding);GO:0001731(formation of translation preinitiation complex);GO:0003743(translation initiation factor activity);GO:0003924(GTPase activity);GO:0005525(GTP binding);GO:0005737(cytoplasm);GO:0005829(cytosol);GO:0005850(eukaryotic translation initiation factor 2 complex);GO:0006412(translation);GO:0006413(translational initiation)	03013(RNA transport)	K03242	NA
2	ENSDARG00000070228	cdk6	0.304096	0.246344	0.303853	0.248	0.037	1.01483e-195	2.8123e-191	cyclin-dependent kinase 6 [Source:ZFIN;Acc:ZDB-GENE-060503-786]	GO:0000166(nucleotide binding);GO:0004672(protein kinase activity);GO:0004674(protein serine/threonine kinase activity);GO:0004693(cyclin-dependent protein serine/threonine kinase activity);GO:0005524(ATP binding);GO:0005634(nucleus);GO:0006468(protein phosphorylation);GO:0042127(regulation of cell population proliferation);GO:0043697(cell dedifferentiation);GO:0051726(regulation of cell cycle)	04110(Cell cycle);04115(p53 signaling pathway);04218(Cellular senescence)	K02091	EC:2.7.11.22
2	ENSDARG00000059654	eif3ba	2.1884	1.69145	0.371622	0.834	0.496	2.04382e-195	5.66383e-191	eukaryotic translation initiation factor 3, subunit Ba [Source:ZFIN;Acc:ZDB-GENE-030131-2748]	GO:0001732(formation of cytoplasmic translation initiation complex);GO:0002183(cytoplasmic translational initiation);GO:0003313(heart rudiment development);GO:0003676(nucleic acid binding);GO:0003723(RNA binding);GO:0003743(translation initiation factor activity);GO:0005515(protein binding);GO:0005737(cytoplasm);GO:0005852(eukaryotic translation initiation factor 3 complex);GO:0006412(translation…	03013(RNA transport)	K03253	NA
2	ENSDARG00000003216	anxa2a	4.60972	2.91759	0.659899	0.835	0.492	6.52994e-195	1.80958e-190	annexin A2a [Source:ZFIN;Acc:ZDB-GENE-030131-4282]	GO:0004859(phospholipase inhibitor activity);GO:0005509(calcium ion binding);GO:0005544(calcium-dependent phospholipid binding);GO:0008092(cytoskeletal protein binding);GO:0043086(negative regulation of catalytic activity)	NA	K17092	NA
2	ENSDARG00000076815	eif3s10	2.03833	1.65822	0.297748	0.8	0.472	2.88153e-194	7.98528e-190	eukaryotic translation initiation factor 3, subunit 10 (theta) [Source:ZFIN;Acc:ZDB-GENE-030131-5726]	GO:0001732(formation of cytoplasmic translation initiation complex);GO:0002183(cytoplasmic translational initiation);GO:0002188(translation reinitiation);GO:0003723(RNA binding);GO:0003729(mRNA binding);GO:0003743(translation initiation factor activity);GO:0005737(cytoplasm);GO:0005852(eukaryotic translation initiation factor 3 complex);GO:0006412(translation);GO:0006413(translational initiation)…	03013(RNA transport)	K03254	NA
2	ENSDARG00000071331	ryr3	0.554846	0.398613	0.477099	0.304	0.056	3.24272e-194	8.98624e-190	ryanodine receptor 3 [Source:ZFIN;Acc:ZDB-GENE-041001-165]	GO:0005216(ion channel activity);GO:0005219(ryanodine-sensitive calcium-release channel activity);GO:0005262(calcium channel activity);GO:0005509(calcium ion binding);GO:0005515(protein binding);GO:0005790(smooth endoplasmic reticulum);GO:0005886(plasma membrane);GO:0006811(ion transport);GO:0006816(calcium ion transport);GO:0006874(cellular calcium ion homeostasis);GO:0016020(membrane);GO:001602…	04020(Calcium signaling pathway);04371(Apelin signaling pathway)	K04963	NA
2	ENSDARG00000016548	eif5b	0.952741	0.771969	0.30354	0.512	0.216	1.27637e-193	3.53709e-189	eukaryotic translation initiation factor 5B [Source:ZFIN;Acc:ZDB-GENE-050208-20]	GO:0003743(translation initiation factor activity);GO:0003924(GTPase activity);GO:0005525(GTP binding);GO:0006413(translational initiation)	03013(RNA transport)	K03243	NA
2	ENSDARG00000103433	rpl14	28.7592	21.442	0.423584	1	0.985	8.68661e-193	2.40723e-188	ribosomal protein L14 [Source:ZFIN;Acc:ZDB-GENE-030131-2085]	GO:0003723(RNA binding);GO:0003735(structural constituent of ribosome);GO:0005622(intracellular);GO:0005840(ribosome);GO:0006412(translation);GO:0022625(cytosolic large ribosomal subunit);GO:0042273(ribosomal large subunit biogenesis)	03010(Ribosome)	K02875	NA
2	ENSDARG00000044565	ola1	2.25566	1.84339	0.291186	0.85	0.531	1.45992e-191	4.04572e-187	Obg-like ATPase 1 [Source:ZFIN;Acc:ZDB-GENE-030131-5063]	GO:0000166(nucleotide binding);GO:0005524(ATP binding);GO:0005525(GTP binding);GO:0005634(nucleus);GO:0005730(nucleolus);GO:0005737(cytoplasm);GO:0016787(hydrolase activity);GO:0016887(ATPase activity);GO:0043022(ribosome binding);GO:0043023(ribosomal large subunit binding);GO:0046872(metal ion binding)	NA	K19788	NA
2	ENSDARG00000037846	hm13	0.449922	0.371092	0.277895	0.35	0.108	2.25058e-187	6.23682e-183	histocompatibility (minor) 13 [Source:ZFIN;Acc:ZDB-GENE-020802-3]	GO:0004190(aspartic-type endopeptidase activity);GO:0006465(signal peptide processing);GO:0016020(membrane);GO:0016021(integral component of membrane);GO:0033619(membrane protein proteolysis);GO:0042500(aspartic endopeptidase activity, intramembrane cleaving);GO:0043523(regulation of neuron apoptotic process);GO:0071458(integral component of cytoplasmic side of endoplasmic reticulum membrane);GO:…	NA	K09595	EC:3.4.23.-
2	ENSDARG00000025350	prdx2	3.09278	2.28366	0.437559	0.892	0.583	5.11942e-185	1.41869e-180	peroxiredoxin 2 [Source:ZFIN;Acc:ZDB-GENE-030326-2]	GO:0005829(cytosol);GO:0006979(response to oxidative stress);GO:0008379(thioredoxin peroxidase activity);GO:0016209(antioxidant activity);GO:0016491(oxidoreductase activity);GO:0019430(removal of superoxide radicals);GO:0042744(hydrogen peroxide catabolic process);GO:0045321(leukocyte activation);GO:0045454(cell redox homeostasis);GO:0051920(peroxiredoxin activity);GO:0055114(oxidation-reduction …	NA	K03386	EC:1.11.1.15
2	ENSDARG00000037318	ddost	0.723444	0.595594	0.280552	0.491	0.208	7.87126e-184	2.18128e-179	dolichyl-diphosphooligosaccharide--protein glycosyltransferase subunit (non-catalytic) [Source:ZFIN;Acc:ZDB-GENE-040426-2147]	GO:0005783(endoplasmic reticulum);GO:0005789(endoplasmic reticulum membrane);GO:0006486(protein glycosylation);GO:0016020(membrane);GO:0016021(integral component of membrane);GO:0018279(protein N-linked glycosylation via asparagine)	00510(N-Glycan biosynthesis);04141(Protein processing in endoplasmic reticulum)	K12670	NA
2	ENSDARG00000068289	eif3k	2.63412	2.13578	0.302562	0.893	0.588	1.40786e-182	3.90146e-178	eukaryotic translation initiation factor 3, subunit K [Source:ZFIN;Acc:ZDB-GENE-050417-45]	GO:0001732(formation of cytoplasmic translation initiation complex);GO:0002183(cytoplasmic translational initiation);GO:0003723(RNA binding);GO:0003743(translation initiation factor activity);GO:0005634(nucleus);GO:0005737(cytoplasm);GO:0005852(eukaryotic translation initiation factor 3 complex);GO:0006412(translation);GO:0006413(translational initiation);GO:0006446(regulation of translational in…	NA	K15028	NA
2	ENSDARG00000043475	TAGAP	1.7753	1.36477	0.379407	0.697	0.369	1.41032e-179	3.90828e-175	si:ch211-122h15.4 [Source:ZFIN;Acc:ZDB-GENE-121214-340]	GO:0005096(GTPase activator activity);GO:0007165(signal transduction);GO:0043547(positive regulation of GTPase activity)	NA	K20654	NA
2	ENSDARG00000069045	chtf8	0.889009	0.657597	0.434995	0.494	0.189	8.73126e-174	2.41961e-169	CTF8, chromosome transmission fidelity factor 8 homolog (S. cerevisiae) [Source:ZFIN;Acc:ZDB-GENE-050419-148]	GO:0003674(molecular_function);GO:0007064(mitotic sister chromatid cohesion);GO:0031390(Ctf18 RFC-like complex)	NA	K11270	NA
2	ENSDARG00000061764	ahnak	0.505936	0.396063	0.353225	0.315	0.08	3.3312e-173	9.23143e-169	AHNAK nucleoprotein [Source:ZFIN;Acc:ZDB-GENE-030131-8719]	GO:0003824(catalytic activity);GO:0005515(protein binding);GO:0005737(cytoplasm);GO:0005886(plasma membrane);GO:0016491(oxidoreductase activity);GO:0030315(T-tubule);GO:0043484(regulation of RNA splicing);GO:0055114(oxidation-reduction process)	NA	NA	NA
2	ENSDARG00000057683	mcm6	0.361094	0.292075	0.306036	0.276	0.059	1.47296e-172	4.08185e-168	minichromosome maintenance complex component 6 [Source:ZFIN;Acc:ZDB-GENE-030909-6]	GO:0000166(nucleotide binding);GO:0003677(DNA binding);GO:0003678(DNA helicase activity);GO:0004386(helicase activity);GO:0005524(ATP binding);GO:0005634(nucleus);GO:0006260(DNA replication);GO:0006270(DNA replication initiation);GO:0016787(hydrolase activity);GO:0032508(DNA duplex unwinding);GO:0042555(MCM complex)	03030(DNA replication);04110(Cell cycle)	K02542	EC:3.6.4.12
2	ENSDARG00000009447	atp5mc3b	7.9409	5.81507	0.449506	0.992	0.838	2.27045e-172	6.29188e-168	ATP synthase membrane subunit c locus 3b [Source:ZFIN;Acc:ZDB-GENE-020814-1]	GO:0000276(mitochondrial proton-transporting ATP synthase complex, coupling factor F(o));GO:0006811(ion transport);GO:0008289(lipid binding);GO:0015078(proton transmembrane transporter activity);GO:0015986(ATP synthesis coupled proton transport);GO:0015991(ATP hydrolysis coupled proton transport);GO:0016020(membrane);GO:0016021(integral component of membrane);GO:0033177(proton-transporting two-se…	00190(Oxidative phosphorylation)	K02128	NA
2	ENSDARG00000018637	sec61g	13.3429	10.2947	0.374166	0.997	0.923	8.26587e-171	2.29064e-166	Sec61 translocon gamma subunit [Source:ZFIN;Acc:ZDB-GENE-040718-203]	GO:0005623(cell);GO:0006605(protein targeting);GO:0006886(intracellular protein transport);GO:0015031(protein transport);GO:0015450(P-P-bond-hydrolysis-driven protein transmembrane transporter activity);GO:0016020(membrane);GO:0016021(integral component of membrane);GO:0071806(protein transmembrane transport)	03060(Protein export);04141(Protein processing in endoplasmic reticulum);04145(Phagosome)	K07342	NA
2	ENSDARG00000081270	rn7sk	4.54659	2.66889	0.768543	0.791	0.551	2.97242e-170	8.23716e-166	RNA, 7SK small nuclear [Source:ZFIN;Acc:ZDB-GENE-090323-1]	NA	NA	NA	NA
2	ENSDARG00000070437	rpl22	22.5601	17.8289	0.339556	1	0.975	2.1408e-165	5.93259e-161	ribosomal protein L22 [Source:ZFIN;Acc:ZDB-GENE-051113-276]	GO:0003723(RNA binding);GO:0003735(structural constituent of ribosome);GO:0005622(intracellular);GO:0005840(ribosome);GO:0006412(translation);GO:0022625(cytosolic large ribosomal subunit);GO:0033077(T cell differentiation in thymus)	03010(Ribosome)	K02891	NA
2	ENSDARG00000091003	il34	1.62662	1.30453	0.318342	0.638	0.34	3.65647e-165	1.01328e-160	interleukin 34 [Source:ZFIN;Acc:ZDB-GENE-050419-150]	GO:0001934(positive regulation of protein phosphorylation);GO:0005157(macrophage colony-stimulating factor receptor binding);GO:0005615(extracellular space);GO:0008284(positive regulation of cell population proliferation)	04060(Cytokine-cytokine receptor interaction)	K22633	NA
2	ENSDARG00000013623	vdac2	3.98365	3.26583	0.286642	0.964	0.72	3.38644e-161	9.38451e-157	voltage-dependent anion channel 2 [Source:ZFIN;Acc:ZDB-GENE-030131-845]	GO:0005741(mitochondrial outer membrane);GO:0005886(plasma membrane);GO:0008016(regulation of heart contraction);GO:0008308(voltage-gated anion channel activity);GO:0015267(channel activity);GO:0015698(inorganic anion transport);GO:0031101(fin regeneration);GO:0036444(calcium import into the mitochondrion);GO:0042803(protein homodimerization activity);GO:0055085(transmembrane transport);GO:009865…	04020(Calcium signaling pathway);04216(Ferroptosis);04217(Necroptosis);04218(Cellular senescence);04621(NOD-like receptor signaling pathway)	K15040	NA
2	ENSDARG00000100452	nop53	2.77294	2.06062	0.428333	0.846	0.537	1.38908e-159	3.84942e-155	NOP53 ribosome biogenesis factor [Source:ZFIN;Acc:ZDB-GENE-051120-21]	GO:0000027(ribosomal large subunit assembly);GO:0005634(nucleus);GO:0005654(nucleoplasm);GO:0005730(nucleolus);GO:0006364(rRNA processing);GO:0008097(5S rRNA binding);GO:0042254(ribosome biogenesis)	NA	K14840	NA
2	ENSDARG00000098463	gig2g	0.513948	0.390103	0.39777	0.329	0.086	3.70235e-159	1.026e-154	grass carp reovirus (GCRV)-induced gene 2g [Source:ZFIN;Acc:ZDB-GENE-130517-4]	GO:0003950(NAD+ ADP-ribosyltransferase activity);GO:0005737(cytoplasm)	NA	NA	NA
2	ENSDARG00000103846	hspa5	1.87474	1.46711	0.353712	0.653	0.354	1.44078e-158	3.99268e-154	heat shock protein 5 [Source:ZFIN;Acc:ZDB-GENE-031001-11]	GO:0000166(nucleotide binding);GO:0001666(response to hypoxia);GO:0001878(response to yeast);GO:0005524(ATP binding);GO:0005576(extracellular region);GO:0005634(nucleus);GO:0005737(cytoplasm);GO:0005788(endoplasmic reticulum lumen);GO:0006986(response to unfolded protein);GO:0016020(membrane);GO:0016887(ATPase activity);GO:0030433(ubiquitin-dependent ERAD pathway);GO:0030968(endoplasmic reticulum…	03060(Protein export);04141(Protein processing in endoplasmic reticulum)	K09490	NA
2	ENSDARG00000058734	prdx1	7.36661	6.02295	0.29053	0.966	0.731	6.15159e-156	1.70473e-151	peroxiredoxin 1 [Source:ZFIN;Acc:ZDB-GENE-050320-35]	GO:0005829(cytosol);GO:0006979(response to oxidative stress);GO:0008379(thioredoxin peroxidase activity);GO:0016209(antioxidant activity);GO:0016491(oxidoreductase activity);GO:0019430(removal of superoxide radicals);GO:0032991(protein-containing complex);GO:0042744(hydrogen peroxide catabolic process);GO:0045321(leukocyte activation);GO:0045454(cell redox homeostasis);GO:0051920(peroxiredoxin ac…	04146(Peroxisome)	K13279	EC:1.11.1.15
2	ENSDARG00000063177	manf	0.429677	0.356283	0.270228	0.311	0.096	5.73358e-152	1.58889e-147	mesencephalic astrocyte-derived neurotrophic factor [Source:ZFIN;Acc:ZDB-GENE-060929-640]	GO:0003674(molecular_function);GO:0005615(extracellular space);GO:0005783(endoplasmic reticulum);GO:0031175(neuron projection development);GO:0071542(dopaminergic neuron differentiation)	NA	K22556	NA
2	ENSDARG00000025850	rps21	25.7945	20.4899	0.332154	1	0.979	4.76349e-150	1.32006e-145	ribosomal protein S21 [Source:ZFIN;Acc:ZDB-GENE-040426-1102]	GO:0000447(endonucleolytic cleavage in ITS1 to separate SSU-rRNA from 5.8S rRNA and LSU-rRNA from tricistronic rRNA transcript (SSU-rRNA, 5.8S rRNA, LSU-rRNA));GO:0000461(endonucleolytic cleavage to generate mature 3'-end of SSU-rRNA from (SSU-rRNA, 5.8S rRNA, LSU-rRNA));GO:0002181(cytoplasmic translation);GO:0003735(structural constituent of ribosome);GO:0005622(intracellular);GO:0005737(cytopla…	03010(Ribosome)	K02971	NA
2	ENSDARG00000035400	btf3	13.7886	10.5429	0.387215	0.999	0.949	8.35155e-146	2.31438e-141	basic transcription factor 3 [Source:ZFIN;Acc:ZDB-GENE-030131-8731]	NA	NA	NA	NA
2	ENSDARG00000035133	pho	0.552583	0.454858	0.280773	0.291	0.094	4.16182e-135	1.15332e-130	phoenix [Source:ZFIN;Acc:ZDB-GENE-030131-5935]	GO:0070658(neuromast hair cell differentiation involved in neuromast regeneration)	NA	NA	NA
2	ENSDARG00000016889	eif3g	3.29585	2.74988	0.261282	0.911	0.665	2.93047e-131	8.12091e-127	eukaryotic translation initiation factor 3, subunit G [Source:ZFIN;Acc:ZDB-GENE-040426-1076]	GO:0001732(formation of cytoplasmic translation initiation complex);GO:0002183(cytoplasmic translational initiation);GO:0003676(nucleic acid binding);GO:0003723(RNA binding);GO:0003743(translation initiation factor activity);GO:0005737(cytoplasm);GO:0005852(eukaryotic translation initiation factor 3 complex);GO:0006412(translation);GO:0006413(translational initiation);GO:0016282(eukaryotic 43S pr…	03013(RNA transport)	K03248	NA
2	ENSDARG00000077533	eif3f	7.3736	6.03488	0.289044	0.993	0.873	1.45349e-129	4.02791e-125	eukaryotic translation initiation factor 3, subunit F [Source:ZFIN;Acc:ZDB-GENE-100215-2]	GO:0003743(translation initiation factor activity);GO:0005515(protein binding);GO:0005737(cytoplasm);GO:0005852(eukaryotic translation initiation factor 3 complex);GO:0006412(translation);GO:0006413(translational initiation);GO:0031369(translation initiation factor binding);GO:0071541(eukaryotic translation initiation factor 3 complex, eIF3m);GO:1904888(cranial skeletal system development)	03013(RNA transport)	K03249	NA
2	ENSDARG00000033170	sult2st1	7.95787	6.17942	0.36491	0.977	0.792	2.45806e-129	6.81178e-125	sulfotransferase family 2, cytosolic sulfotransferase 1 [Source:ZFIN;Acc:ZDB-GENE-030219-114]	GO:0008146(sulfotransferase activity);GO:0016740(transferase activity);GO:0016783(sulfurtransferase activity)	NA	NA	NA
2	ENSDARG00000055475	rps27.2	5.96076	4.58653	0.378096	0.972	0.803	7.78918e-124	2.15854e-119	ribosomal protein S27, isoform 2 [Source:ZFIN;Acc:ZDB-GENE-040426-1735]	GO:0000028(ribosomal small subunit assembly);GO:0003735(structural constituent of ribosome);GO:0005622(intracellular);GO:0005840(ribosome);GO:0006412(translation);GO:0022627(cytosolic small ribosomal subunit);GO:0046872(metal ion binding)	03010(Ribosome)	K02978	NA
2	ENSDARG00000037188	rpa2	0.411395	0.336096	0.291651	0.276	0.083	2.782e-117	7.70948e-113	replication protein A2 [Source:ZFIN;Acc:ZDB-GENE-010131-3]	GO:0000722(telomere maintenance via recombination);GO:0000724(double-strand break repair via homologous recombination);GO:0000781(chromosome, telomeric region);GO:0000785(chromatin);GO:0000794(condensed nuclear chromosome);GO:0003677(DNA binding);GO:0003684(damaged DNA binding);GO:0003690(double-stranded DNA binding);GO:0003697(single-stranded DNA binding);GO:0005515(protein binding);GO:0005634(n…	03030(DNA replication);03420(Nucleotide excision repair);03430(Mismatch repair);03440(Homologous recombination);03460(Fanconi anemia pathway)	K10739	NA
2	ENSDARG00000007708	nsa2	6.85514	5.40854	0.341946	0.981	0.835	2.68576e-115	7.44277e-111	NSA2 ribosome biogenesis homolog (S. cerevisiae) [Source:ZFIN;Acc:ZDB-GENE-030131-488]	GO:0030687(preribosome, large subunit precursor)	NA	K14842	NA
2	ENSDARG00000041959	cxcr4b	6.47025	4.70174	0.460626	0.873	0.635	1.15239e-111	3.19349e-107	chemokine (C-X-C motif), receptor 4b [Source:ZFIN;Acc:ZDB-GENE-010614-1]	GO:0001637(G protein-coupled chemoattractant receptor activity);GO:0001667(ameboidal-type cell migration);GO:0001764(neuron migration);GO:0004930(G protein-coupled receptor activity);GO:0004950(chemokine receptor activity);GO:0005886(plasma membrane);GO:0006935(chemotaxis);GO:0006955(immune response);GO:0007165(signal transduction);GO:0007186(G protein-coupled receptor signaling pathway);GO:00072…	04020(Calcium signaling pathway);04060(Cytokine-cytokine receptor interaction);04144(Endocytosis);04672(Intestinal immune network for IgA production);04810(Regulation of actin cytoskeleton)	K04189	NA
2	ENSDARG00000013670	hyou1	0.571205	0.450683	0.341896	0.307	0.107	1.70106e-107	4.71398e-103	hypoxia up-regulated 1 [Source:ZFIN;Acc:ZDB-GENE-030131-5344]	GO:0000166(nucleotide binding);GO:0005524(ATP binding)	04141(Protein processing in endoplasmic reticulum)	K09486	NA
2	ENSDARG00000009087	cd74a	1.28416	0.870407	0.561059	0.375	0.158	1.83558e-101	5.08676e-97	CD74 molecule, major histocompatibility complex, class II invariant chain a [Source:ZFIN;Acc:ZDB-GENE-000901-1]	GO:0002286(T cell activation involved in immune response);GO:0002468(dendritic cell antigen processing and presentation);GO:0006886(intracellular protein transport);GO:0006955(immune response);GO:0009986(cell surface);GO:0016020(membrane);GO:0016021(integral component of membrane);GO:0019882(antigen processing and presentation);GO:0042289(MHC class II protein binding);GO:0048839(inner ear develop…	05168(Herpes simplex virus 1 infection)	K06505	NA
2	ENSDARG00000069018	cyp7a1	0.41493	0.332718	0.318569	0.199	0.05	3.35519e-96	9.29791e-92	cytochrome P450, family 7, subfamily A, polypeptide 1 [Source:ZFIN;Acc:ZDB-GENE-040426-1296]	GO:0004497(monooxygenase activity);GO:0005506(iron ion binding);GO:0005783(endoplasmic reticulum);GO:0005789(endoplasmic reticulum membrane);GO:0006699(bile acid biosynthetic process);GO:0006707(cholesterol catabolic process);GO:0008123(cholesterol 7-alpha-monooxygenase activity);GO:0008203(cholesterol metabolic process);GO:0016020(membrane);GO:0016021(integral component of membrane);GO:0016491(o…	00120(Primary bile acid biosynthesis);00140(Steroid hormone biosynthesis);03320(PPAR signaling pathway)	K00489	EC:1.14.14.23
2	ENSDARG00000036628	cd74b	0.838686	0.637357	0.396029	0.344	0.14	6.96148e-95	1.92917e-90	CD74 molecule, major histocompatibility complex, class II invariant chain b [Source:ZFIN;Acc:ZDB-GENE-990910-10]	GO:0005623(cell);GO:0006886(intracellular protein transport);GO:0006955(immune response);GO:0016020(membrane);GO:0016021(integral component of membrane);GO:0019882(antigen processing and presentation);GO:0042289(MHC class II protein binding);GO:0048839(inner ear development);GO:0048884(neuromast development)	NA	NA	NA
2	ENSDARG00000028618	krt18b	1.08623	0.880449	0.303012	0.39	0.187	3.27705e-94	9.08136e-90	keratin 18b [Source:ZFIN;Acc:ZDB-GENE-040426-1508]	GO:0005198(structural molecule activity);GO:0005882(intermediate filament);GO:0008150(biological_process)	NA	NA	NA
2	ENSDARG00000054155	pcna	1.24172	0.993875	0.321207	0.438	0.24	9.25772e-84	2.5655e-79	proliferating cell nuclear antigen [Source:ZFIN;Acc:ZDB-GENE-000210-8]	GO:0003677(DNA binding);GO:0005634(nucleus);GO:0006260(DNA replication);GO:0006272(leading strand elongation);GO:0006275(regulation of DNA replication);GO:0006298(mismatch repair);GO:0009617(response to bacterium);GO:0014823(response to activity);GO:0019985(translesion synthesis);GO:0030337(DNA polymerase processivity factor activity);GO:0043626(PCNA complex);GO:0070557(PCNA-p21 complex)	03030(DNA replication);03410(Base excision repair);03420(Nucleotide excision repair);03430(Mismatch repair);04110(Cell cycle);04530(Tight junction)	K04802	NA
3	ENSDARG00000092191	CR318588.1	399.912	46.3024	3.11052	0.999	0.792	0	0	uncharacterized LOC100535167 [Source:NCBI gene;Acc:100535167]	NA	NA	NA	NA
3	ENSDARG00000039243	zgc:152791	23.5463	3.05317	2.94712	0.99	0.318	0	0	zgc:152791 [Source:ZFIN;Acc:ZDB-GENE-060901-4]	GO:0003674(molecular_function);GO:0005739(mitochondrion);GO:0008150(biological_process);GO:0016020(membrane);GO:0016021(integral component of membrane)	NA	NA	NA
3	ENSDARG00000074217	si:dkey-188i13.6	7.04636	1.11684	2.65746	0.658	0.062	0	0	si:dkey-188i13.6 [Source:ZFIN;Acc:ZDB-GENE-030131-7410]	GO:0005739(mitochondrion);GO:0016021(integral component of membrane)	NA	NA	NA
3	ENSDARG00000017489	ifi45	5.07302	1.31032	1.95293	0.698	0.15	0	0	interferon alpha inducible protein 45 [Source:ZFIN;Acc:ZDB-GENE-051030-98]	GO:0003674(molecular_function);GO:0005739(mitochondrion);GO:0008150(biological_process);GO:0016020(membrane);GO:0016021(integral component of membrane)	NA	NA	NA
3	ENSDARG00000094719	CR318588.3	21.2437	5.60708	1.92171	0.872	0.447	0	0	uncharacterized LOC101884954 [Source:NCBI gene;Acc:101884954]	NA	NA	NA	NA
3	ENSDARG00000092833	CR318588.2	3.03167	0.814135	1.89677	0.552	0.027	0	0	si:dkeyp-1h4.8 [Source:NCBI gene;Acc:100535122]	NA	NA	NA	NA
3	ENSDARG00000093936	si:dkeyp-1h4.6	3.10891	0.847847	1.87453	0.751	0.041	0	0	si:dkeyp-1h4.6 [Source:ZFIN;Acc:ZDB-GENE-060503-841]	NA	NA	NA	NA
3	ENSDARG00000078389	ifi46	8.2971	2.26619	1.87234	0.978	0.395	0	0	interferon alpha inducible protein 46 [Source:ZFIN;Acc:ZDB-GENE-090312-190]	GO:0005739(mitochondrion);GO:0016021(integral component of membrane)	NA	NA	NA
3	ENSDARG00000096562	wu:fj29h11	6.01627	1.97291	1.60855	0.911	0.395	0	0	wu:fj29h11 [Source:ZFIN;Acc:ZDB-GENE-030131-7558]	NA	NA	NA	NA
3	ENSDARG00000044125	txn	8.38999	2.94494	1.51043	0.956	0.472	0	0	thioredoxin [Source:ZFIN;Acc:ZDB-GENE-040718-162]	GO:0005623(cell);GO:0006662(glycerol ether metabolic process);GO:0015035(protein disulfide oxidoreductase activity);GO:0045454(cell redox homeostasis);GO:0055114(oxidation-reduction process)	04621(NOD-like receptor signaling pathway)	K03671	NA
3	ENSDARG00000088251	lgals17	2.37117	0.8961	1.40387	0.752	0.096	0	0	galectin 17 [Source:ZFIN;Acc:ZDB-GENE-131121-418]	GO:0006955(immune response);GO:0007165(signal transduction);GO:0007166(cell surface receptor signaling pathway);GO:0009897(external side of plasma membrane);GO:0009986(cell surface);GO:0031295(T cell costimulation);GO:0042102(positive regulation of T cell proliferation);GO:0042130(negative regulation of T cell proliferation);GO:0071222(cellular response to lipopolysaccharide)	NA	NA	NA
3	ENSDARG00000012729	hcls1	5.43038	2.27618	1.25444	0.943	0.518	0	0	hematopoietic cell-specific Lyn substrate 1 [Source:ZFIN;Acc:ZDB-GENE-030131-7191]	GO:0003779(actin binding);GO:0005515(protein binding);GO:0030041(actin filament polymerization)	04530(Tight junction)	K06106	NA
3	ENSDARG00000099572	hmgn2	54.5917	22.9829	1.24812	0.995	0.93	0	0	high mobility group nucleosomal binding domain 2 [Source:ZFIN;Acc:ZDB-GENE-051030-81]	GO:0000785(chromatin);GO:0005634(nucleus);GO:0008150(biological_process);GO:0031492(nucleosomal DNA binding)	NA	K11300	NA
3	ENSDARG00000057173	ifit8	1.4473	0.629023	1.20218	0.598	0.029	0	0	interferon-induced protein with tetratricopeptide repeats 8 [Source:ZFIN;Acc:ZDB-GENE-051127-17]	GO:0005515(protein binding);GO:0005829(cytosol);GO:0051607(defense response to virus)	NA	NA	NA
3	ENSDARG00000037746	actb1	61.3352	27.2273	1.17166	1	0.993	0	0	actin, beta 1 [Source:ZFIN;Acc:ZDB-GENE-000329-1]	GO:0000166(nucleotide binding);GO:0005524(ATP binding);GO:0005634(nucleus);GO:0005737(cytoplasm);GO:0005856(cytoskeleton);GO:0005886(plasma membrane);GO:0005925(focal adhesion);GO:0015629(actin cytoskeleton);GO:0097433(dense body)	04145(Phagosome);04210(Apoptosis);04510(Focal adhesion);04520(Adherens junction);04530(Tight junction);04810(Regulation of actin cytoskeleton);05132(Salmonella infection)	K05692	NA
3	ENSDARG00000100968	si:ch211-1a19.3	1.59152	0.711108	1.16227	0.58	0.06	0	0	si:ch211-1a19.3 [Source:ZFIN;Acc:ZDB-GENE-141216-322]	GO:0016020(membrane);GO:0016021(integral component of membrane)	NA	NA	NA
3	ENSDARG00000075151	si:dkey-188i13.10	3.22731	1.52263	1.08377	0.823	0.335	0	0	si:dkey-188i13.10 [Source:ZFIN;Acc:ZDB-GENE-090313-208]	GO:0005739(mitochondrion);GO:0016020(membrane);GO:0016021(integral component of membrane)	NA	NA	NA
3	ENSDARG00000019521	mpx	37.7312	18.5865	1.0215	0.999	0.97	0	0	myeloid-specific peroxidase [Source:ZFIN;Acc:ZDB-GENE-030131-9460]	GO:0004601(peroxidase activity);GO:0005515(protein binding);GO:0005615(extracellular space);GO:0005737(cytoplasm);GO:0006952(defense response);GO:0006954(inflammatory response);GO:0006979(response to oxidative stress);GO:0009617(response to bacterium);GO:0010310(regulation of hydrogen peroxide metabolic process);GO:0020037(heme binding);GO:0055114(oxidation-reduction process);GO:0098869(cellular …	NA	NA	NA
3	ENSDARG00000040971	zgc:92606	1.9603	0.982411	0.996678	0.736	0.228	0	0	zgc:92606 [Source:ZFIN;Acc:ZDB-GENE-040718-462]	GO:0000045(autophagosome assembly);GO:0000421(autophagosome membrane);GO:0000422(autophagy of mitochondrion);GO:0005737(cytoplasm);GO:0005829(cytosol);GO:0006914(autophagy);GO:0006995(cellular response to nitrogen starvation);GO:0050811(GABA receptor binding)	NA	NA	NA
3	ENSDARG00000069425	hsbp1a	1.55889	0.785054	0.989655	0.651	0.17	0	0	heat shock factor binding protein 1a [Source:ZFIN;Acc:ZDB-GENE-050320-136]	GO:0003714(transcription corepressor activity);GO:0005575(cellular_component);GO:0005634(nucleus);GO:0005737(cytoplasm);GO:0005829(cytosol);GO:0070370(cellular heat acclimation);GO:1903507(negative regulation of nucleic acid-templated transcription)	NA	NA	NA
3	ENSDARG00000004953	mxb	1.04891	0.53328	0.975929	0.437	0.018	0	0	myxovirus (influenza) resistance B [Source:ZFIN;Acc:ZDB-GENE-030721-6]	GO:0000166(nucleotide binding);GO:0003924(GTPase activity);GO:0005525(GTP binding)	NA	NA	NA
3	ENSDARG00000076182	stat1b	1.15269	0.602783	0.935299	0.524	0.057	0	0	signal transducer and activator of transcription 1b [Source:ZFIN;Acc:ZDB-GENE-030616-23]	GO:0003677(DNA binding);GO:0003700(DNA-binding transcription factor activity);GO:0005634(nucleus);GO:0005737(cytoplasm);GO:0006355(regulation of transcription, DNA-templated);GO:0007165(signal transduction);GO:0030097(hemopoiesis)	04217(Necroptosis);04620(Toll-like receptor signaling pathway);04621(NOD-like receptor signaling pathway);04625(C-type lectin receptor signaling pathway);04933(AGE-RAGE signaling pathway in diabetic complications);05168(Herpes simplex virus 1 infection)	K11220	NA
3	ENSDARG00000073994	si:ch211-276k2.1	0.822009	0.463863	0.825455	0.34	0.014	0	0	si:ch211-276k2.1 [Source:ZFIN;Acc:ZDB-GENE-081022-201]	NA	NA	NA	NA
3	ENSDARG00000025601	trim35-14	1.07125	0.605342	0.823467	0.489	0.07	0	0	tripartite motif containing 35-14 [Source:ZFIN;Acc:ZDB-GENE-110920-6]	GO:0005515(protein binding);GO:0008270(zinc ion binding);GO:0046872(metal ion binding)	NA	NA	NA
3	ENSDARG00000029720	si:dkeyp-9d4.2	1.01407	0.577071	0.813334	0.479	0.058	0	0	si:dkeyp-9d4.2 [Source:ZFIN;Acc:ZDB-GENE-090312-156]	GO:0005525(GTP binding);GO:0006955(immune response)	NA	NA	NA
3	ENSDARG00000074754	si:dkey-188i13.9	0.767506	0.456789	0.748651	0.375	0.027	0	0	si:dkey-188i13.9 [Source:ZFIN;Acc:ZDB-GENE-090313-211]	GO:0005739(mitochondrion);GO:0016020(membrane);GO:0016021(integral component of membrane)	NA	NA	NA
3	ENSDARG00000022652	psmf1	0.92992	0.556456	0.740838	0.509	0.08	0	0	proteasome inhibitor subunit 1 [Source:ZFIN;Acc:ZDB-GENE-040718-282]	GO:0003674(molecular_function);GO:0005575(cellular_component);GO:0006511(ubiquitin-dependent protein catabolic process)	03050(Proteasome)	K06700	NA
3	ENSDARG00000098204	CU984600.2	1.14724	0.687095	0.739586	0.503	0.091	0	0	si:dkeyp-118h9.7 [Source:NCBI gene;Acc:555303]	NA	NA	K17592	NA
3	ENSDARG00000092895	si:dkey-188i13.11	0.823525	0.500412	0.718696	0.474	0.068	0	0	si:dkey-188i13.11 [Source:ZFIN;Acc:ZDB-GENE-090313-209]	GO:0005739(mitochondrion);GO:0016020(membrane);GO:0016021(integral component of membrane)	NA	NA	NA
3	ENSDARG00000060322	zgc:153654	0.648861	0.40474	0.680914	0.404	0.019	0	0	zgc:153654 [Source:ZFIN;Acc:ZDB-GENE-060929-1102]	GO:0005525(GTP binding);GO:0005575(cellular_component);GO:0006955(immune response);GO:0008150(biological_process)	NA	NA	NA
3	ENSDARG00000053387	CU207281.1	0.555131	0.361859	0.617399	0.307	0.009	0	0	NA	NA	NA	NA	NA
3	ENSDARG00000057882	arpc3	10.5812	5.87802	0.848102	0.978	0.845	0	0	actin related protein 2/3 complex, subunit 3 [Source:ZFIN;Acc:ZDB-GENE-040625-107]	GO:0003779(actin binding);GO:0005737(cytoplasm);GO:0005856(cytoskeleton);GO:0005885(Arp2/3 protein complex);GO:0030833(regulation of actin filament polymerization);GO:0034314(Arp2/3 complex-mediated actin nucleation);GO:0051015(actin filament binding)	04144(Endocytosis);04810(Regulation of actin cytoskeleton);05132(Salmonella infection)	K05756	NA
3	ENSDARG00000086374	isg15	7.48746	3.3453	1.16234	0.816	0.329	7.40346e-307	2.05165e-302	ISG15 ubiquitin-like modifier [Source:ZFIN;Acc:ZDB-GENE-021211-1]	GO:0005515(protein binding);GO:0005634(nucleus);GO:0005737(cytoplasm);GO:0016567(protein ubiquitination);GO:0019941(modification-dependent protein catabolic process);GO:0031386(protein tag);GO:0031625(ubiquitin protein ligase binding)	NA	NA	NA
3	ENSDARG00000090444	ponzr1	5.57028	2.88687	0.948245	0.941	0.63	5.54392e-304	1.53633e-299	plac8 onzin related protein 1 [Source:ZFIN;Acc:ZDB-GENE-070727-1]	GO:0016020(membrane);GO:0016021(integral component of membrane);GO:0035775(pronephric glomerulus morphogenesis);GO:0048703(embryonic viscerocranium morphogenesis);GO:0072078(nephron tubule morphogenesis)	NA	NA	NA
3	ENSDARG00000098772	gig2d	4.71131	2.34632	1.00573	0.903	0.473	1.30089e-303	3.60501e-299	grass carp reovirus (GCRV)-induced gene 2d [Source:ZFIN;Acc:ZDB-GENE-130517-1]	GO:0003950(NAD+ ADP-ribosyltransferase activity);GO:0005737(cytoplasm)	NA	NA	NA
3	ENSDARG00000008155	sms	8.93461	4.55747	0.971171	0.94	0.685	1.34129e-293	3.71699e-289	spermine synthase [Source:ZFIN;Acc:ZDB-GENE-040625-150]	GO:0005575(cellular_component);GO:0006596(polyamine biosynthetic process);GO:0006597(spermine biosynthetic process);GO:0016740(transferase activity);GO:0016768(spermine synthase activity)	00270(Cysteine and methionine metabolism);00330(Arginine and proline metabolism);00410(beta-Alanine metabolism);00480(Glutathione metabolism)	K00802	EC:2.5.1.22
3	ENSDARG00000010729	CABZ01073795.1	0.890032	0.527605	0.754401	0.358	0.038	1.87965e-283	5.20887e-279	interferon-induced protein 44 [Source:NCBI gene;Acc:795887]	GO:0005525(GTP binding);GO:0006955(immune response)	NA	NA	NA
3	ENSDARG00000021124	cfl1	38.3251	26.7835	0.516946	0.999	0.993	2.31582e-283	6.4176e-279	cofilin 1 [Source:ZFIN;Acc:ZDB-GENE-030131-215]	GO:0003779(actin binding);GO:0005622(intracellular);GO:0007015(actin filament organization);GO:0015629(actin cytoskeleton);GO:0030030(cell projection organization);GO:0030042(actin filament depolymerization);GO:0055113(epiboly involved in gastrulation with mouth forming second);GO:0060271(cilium assembly);GO:0061371(determination of heart left/right asymmetry);GO:0070586(cell-cell adhesion involv…	04810(Regulation of actin cytoskeleton)	K05765	NA
3	ENSDARG00000023188	lcp1	14.6129	9.3755	0.640275	0.996	0.943	2.85319e-280	7.90676e-276	lymphocyte cytosolic protein 1 (L-plastin) [Source:ZFIN;Acc:ZDB-GENE-991213-5]	GO:0003779(actin binding);GO:0005509(calcium ion binding);GO:0005515(protein binding);GO:0051015(actin filament binding);GO:0051017(actin filament bundle assembly)	NA	K17276	NA
3	ENSDARG00000025903	lgals9l1	1.62977	0.853665	0.932929	0.536	0.124	1.04339e-278	2.89145e-274	lectin, galactoside-binding, soluble, 9 (galectin 9)-like 1 [Source:ZFIN;Acc:ZDB-GENE-030131-9543]	GO:0005575(cellular_component);GO:0008150(biological_process);GO:0030246(carbohydrate binding)	NA	K10093	NA
3	ENSDARG00000093857	si:dkey-79f11.10	1.10031	0.574714	0.936989	0.326	0.028	2.8479e-273	7.89211e-269	si:dkey-79f11.10 [Source:ZFIN;Acc:ZDB-GENE-050302-48]	GO:0005525(GTP binding);GO:0006955(immune response)	NA	NA	NA
3	ENSDARG00000116491	h2afvb	6.39087	3.09634	1.04545	0.908	0.559	1.49703e-272	4.14858e-268	H2A histone family, member Vb [Source:ZFIN;Acc:ZDB-GENE-050506-24]	GO:0000786(nucleosome);GO:0000790(nuclear chromatin);GO:0003677(DNA binding);GO:0005634(nucleus);GO:0005694(chromosome);GO:0006325(chromatin organization);GO:0043045(DNA methylation involved in embryo development);GO:0046982(protein heterodimerization activity)	04217(Necroptosis)	K11251	NA
3	ENSDARG00000077777	tmsb4x	165.616	109.611	0.595453	1	1	2.29867e-271	6.37008e-267	thymosin beta 4 X-linked [Source:ZFIN;Acc:ZDB-GENE-030131-8304]	GO:0001947(heart looping);GO:0003181(atrioventricular valve morphogenesis);GO:0003779(actin binding);GO:0003785(actin monomer binding);GO:0005737(cytoplasm);GO:0005856(cytoskeleton);GO:0007015(actin filament organization);GO:0030334(regulation of cell migration);GO:0036302(atrioventricular canal development);GO:0042989(sequestering of actin monomers)	04810(Regulation of actin cytoskeleton)	K05764	NA
3	ENSDARG00000021688	mxa	0.47354	0.342103	0.469057	0.305	0.03	5.17709e-258	1.43468e-253	myxovirus (influenza) resistance A [Source:ZFIN;Acc:ZDB-GENE-030721-5]	GO:0000166(nucleotide binding);GO:0003924(GTPase activity);GO:0005525(GTP binding)	NA	NA	NA
3	ENSDARG00000053136	b2m	27.8011	18.2306	0.608778	0.998	0.985	6.57031e-257	1.82076e-252	beta-2-microglobulin [Source:ZFIN;Acc:ZDB-GENE-980526-88]	GO:0002376(immune system process);GO:0002474(antigen processing and presentation of peptide antigen via MHC class I);GO:0002755(MyD88-dependent toll-like receptor signaling pathway);GO:0004672(protein kinase activity);GO:0005515(protein binding);GO:0005524(ATP binding);GO:0005576(extracellular region);GO:0006468(protein phosphorylation);GO:0006955(immune response);GO:0007165(signal transduction);…	05168(Herpes simplex virus 1 infection)	K08055	NA
3	ENSDARG00000068939	xaf1	1.78642	1.14853	0.63729	0.717	0.281	1.57964e-248	4.37749e-244	XIAP associated factor 1 [Source:ZFIN;Acc:ZDB-GENE-060929-840]	GO:0006915(apoptotic process);GO:0008270(zinc ion binding);GO:0046872(metal ion binding)	NA	NA	NA
3	ENSDARG00000041060	lgals9l3	1.86695	1.04267	0.840406	0.683	0.252	1.74763e-247	4.84304e-243	lectin, galactoside-binding, soluble, 9 (galectin 9)-like 3 [Source:ZFIN;Acc:ZDB-GENE-040718-159]	GO:0005575(cellular_component);GO:0008150(biological_process);GO:0030246(carbohydrate binding)	NA	K10093	NA
3	ENSDARG00000043257	ckbb	1.80336	0.893083	1.01382	0.539	0.176	2.38196e-243	6.60088e-239	creatine kinase, brain b [Source:ZFIN;Acc:ZDB-GENE-020103-2]	GO:0000166(nucleotide binding);GO:0003824(catalytic activity);GO:0004111(creatine kinase activity);GO:0005524(ATP binding);GO:0016301(kinase activity);GO:0016310(phosphorylation);GO:0016740(transferase activity);GO:0016772(transferase activity, transferring phosphorus-containing groups)	00330(Arginine and proline metabolism)	K00933	EC:2.7.3.2
3	ENSDARG00000069846	zgc:162944	6.76033	4.02069	0.749652	0.974	0.757	1.36509e-239	3.78292e-235	zgc:162944 [Source:ZFIN;Acc:ZDB-GENE-070424-75]	GO:0003674(molecular_function);GO:0008150(biological_process)	NA	NA	NA
3	ENSDARG00000101254	BX649411.1	0.958207	0.590689	0.697937	0.474	0.109	4.9139e-237	1.36174e-232	uncharacterized LOC108183364 [Source:NCBI gene;Acc:108183364]	NA	NA	NA	NA
3	ENSDARG00000099465	rnf213a	4.10432	2.24998	0.867234	0.877	0.502	1.19575e-225	3.31368e-221	ring finger protein 213a [Source:ZFIN;Acc:ZDB-GENE-050302-100]	GO:0001525(angiogenesis);GO:0002040(sprouting angiogenesis);GO:0004842(ubiquitin-protein transferase activity);GO:0005737(cytoplasm);GO:0005829(cytosol);GO:0006511(ubiquitin-dependent protein catabolic process);GO:0008015(blood circulation);GO:0016567(protein ubiquitination);GO:0016740(transferase activity);GO:0016787(hydrolase activity);GO:0016887(ATPase activity);GO:0046872(metal ion binding)	NA	K22754	EC:2.3.2.27
3	ENSDARG00000069461	rnaseka	3.07044	1.86794	0.716992	0.875	0.476	1.51618e-225	4.20165e-221	ribonuclease, RNase K a [Source:ZFIN;Acc:ZDB-GENE-060825-301]	GO:0004518(nuclease activity);GO:0004519(endonuclease activity);GO:0004521(endoribonuclease activity);GO:0005575(cellular_component);GO:0016020(membrane);GO:0016021(integral component of membrane);GO:0016787(hydrolase activity);GO:0090305(nucleic acid phosphodiester bond hydrolysis);GO:0090502(RNA phosphodiester bond hydrolysis, endonucleolytic)	NA	NA	NA
3	ENSDARG00000075743	mrpl47	1.1861	0.732518	0.695287	0.579	0.185	7.64771e-224	2.11933e-219	mitochondrial ribosomal protein L47 [Source:ZFIN;Acc:ZDB-GENE-030219-177]	GO:0003735(structural constituent of ribosome);GO:0005622(intracellular);GO:0005761(mitochondrial ribosome);GO:0005762(mitochondrial large ribosomal subunit);GO:0005840(ribosome);GO:0006412(translation);GO:0032543(mitochondrial translation)	NA	K17428	NA
3	ENSDARG00000026829	cotl1	25.4642	17.2784	0.559503	0.996	0.984	2.28506e-214	6.33236e-210	coactosin-like F-actin binding protein 1 [Source:ZFIN;Acc:ZDB-GENE-030131-8325]	GO:0003779(actin binding);GO:0005622(intracellular)	NA	NA	NA
3	ENSDARG00000035136	selenow1	36.2573	23.4888	0.626297	0.998	0.988	9.47012e-214	2.62436e-209	selenoprotein W, 1 [Source:ZFIN;Acc:ZDB-GENE-030410-5]	NA	NA	NA	NA
3	ENSDARG00000078731	si:dkey-85k7.12	0.583239	0.419068	0.476903	0.344	0.062	4.5512e-212	1.26123e-207	si:dkey-85k7.12 [Source:ZFIN;Acc:ZDB-GENE-130530-855]	GO:0005515(protein binding);GO:0005525(GTP binding)	NA	NA	NA
3	ENSDARG00000088612	si:ch211-153b23.7	1.7379	1.35305	0.361131	0.679	0.308	1.83881e-211	5.09572e-207	si:ch211-153b23.7 [Source:ZFIN;Acc:ZDB-GENE-141216-14]	GO:0002755(MyD88-dependent toll-like receptor signaling pathway);GO:0043124(negative regulation of I-kappaB kinase/NF-kappaB signaling);GO:0050727(regulation of inflammatory response);GO:0070373(negative regulation of ERK1 and ERK2 cascade)	NA	NA	NA
3	ENSDARG00000038010	rac2	12.6465	8.90221	0.506505	0.996	0.945	8.06433e-209	2.23479e-204	Rac family small GTPase 2 [Source:ZFIN;Acc:ZDB-GENE-040625-27]	GO:0000166(nucleotide binding);GO:0001780(neutrophil homeostasis);GO:0002446(neutrophil mediated immunity);GO:0002685(regulation of leukocyte migration);GO:0003924(GTPase activity);GO:0005525(GTP binding);GO:0005622(intracellular);GO:0005737(cytoplasm);GO:0005886(plasma membrane);GO:0007264(small GTPase mediated signal transduction);GO:0007266(Rho protein signal transduction);GO:0008045(motor neu…	04010(MAPK signaling pathway);04310(Wnt signaling pathway);04370(VEGF signaling pathway);04510(Focal adhesion);04520(Adherens junction);04810(Regulation of actin cytoskeleton)	K07860	NA
3	ENSDARG00000026655	tspo	1.90577	1.20064	0.666571	0.765	0.362	6.57143e-207	1.82108e-202	translocator protein [Source:ZFIN;Acc:ZDB-GENE-041010-125]	GO:0003674(molecular_function);GO:0005741(mitochondrial outer membrane);GO:0016020(membrane);GO:0016021(integral component of membrane);GO:0060319(primitive erythrocyte differentiation)	04080(Neuroactive ligand-receptor interaction)	K05770	NA
3	ENSDARG00000058638	si:ch211-71m22.1	0.571432	0.420806	0.441428	0.352	0.07	2.0473e-204	5.67348e-200	si:ch211-71m22.1 [Source:ZFIN;Acc:ZDB-GENE-070705-193]	GO:0005737(cytoplasm);GO:0017121(plasma membrane phospholipid scrambling);GO:0017128(phospholipid scramblase activity);GO:0044782(cilium organization);GO:0060271(cilium assembly)	NA	NA	NA
3	ENSDARG00000016611	scrn3	0.467189	0.343408	0.444084	0.313	0.047	3.7047e-202	1.02665e-197	secernin 3 [Source:ZFIN;Acc:ZDB-GENE-030131-4783]	GO:0006508(proteolysis);GO:0006887(exocytosis);GO:0016805(dipeptidase activity)	NA	K14358	NA
3	ENSDARG00000096311	si:dkey-211g8.8	0.399041	0.297665	0.42285	0.218	0.016	5.43371e-202	1.50579e-197	si:dkey-211g8.8 [Source:ZFIN;Acc:ZDB-GENE-120215-226]	NA	NA	NA	NA
3	ENSDARG00000006603	csrp1a	1.14673	0.78063	0.554819	0.604	0.225	8.12887e-198	2.25267e-193	cysteine and glycine-rich protein 1a [Source:ZFIN;Acc:ZDB-GENE-030909-4]	GO:0003007(heart morphogenesis);GO:0007254(JNK cascade);GO:0016055(Wnt signaling pathway);GO:0031102(neuron projection regeneration);GO:0042074(cell migration involved in gastrulation);GO:0046872(metal ion binding);GO:0060027(convergent extension involved in gastrulation)	NA	K09377	NA
3	ENSDARG00000078182	zgc:194443	0.285599	0.231888	0.300564	0.219	0.021	1.10109e-193	3.05134e-189	zgc:194443 [Source:ZFIN;Acc:ZDB-GENE-080723-6]	GO:0005525(GTP binding);GO:0005575(cellular_component);GO:0008150(biological_process)	NA	NA	NA
3	ENSDARG00000004405	snx10a	1.21471	0.77997	0.639126	0.435	0.117	2.28444e-192	6.33065e-188	sorting nexin 10a [Source:ZFIN;Acc:ZDB-GENE-050809-44]	GO:0001947(heart looping);GO:0005737(cytoplasm);GO:0005768(endosome);GO:0005813(centrosome);GO:0005815(microtubule organizing center);GO:0005856(cytoskeleton);GO:0008289(lipid binding);GO:0010008(endosome membrane);GO:0015031(protein transport);GO:0016020(membrane);GO:0030030(cell projection organization);GO:0035091(phosphatidylinositol binding);GO:0060271(cilium assembly);GO:0061512(protein loca…	NA	K17924	NA
3	ENSDARG00000102808	calr3b	1.78475	0.89464	0.996343	0.47	0.158	7.71159e-190	2.13704e-185	calreticulin 3b [Source:ZFIN;Acc:ZDB-GENE-030131-9907]	GO:0005509(calcium ion binding);GO:0005515(protein binding);GO:0005783(endoplasmic reticulum);GO:0006457(protein folding);GO:0046872(metal ion binding);GO:0051082(unfolded protein binding)	04141(Protein processing in endoplasmic reticulum);04145(Phagosome);05168(Herpes simplex virus 1 infection)	K08057	NA
3	ENSDARG00000069844	acod1	0.746378	0.515965	0.532634	0.351	0.073	8.87297e-189	2.45888e-184	aconitate decarboxylase 1 [Source:ZFIN;Acc:ZDB-GENE-081104-428]	GO:0005739(mitochondrion);GO:0006952(defense response);GO:0016829(lyase activity);GO:0019679(propionate metabolic process, methylcitrate cycle);GO:0042742(defense response to bacterium);GO:0047547(2-methylcitrate dehydratase activity);GO:0047613(aconitate decarboxylase activity);GO:1903426(regulation of reactive oxygen species biosynthetic process)	NA	K17724	EC:4.1.1.6
3	ENSDARG00000031885	psmb12	1.17296	0.750653	0.643934	0.55	0.19	1.78812e-187	4.95524e-183	proteasome subunit beta 12 [Source:ZFIN;Acc:ZDB-GENE-001208-1]	GO:0000502(proteasome complex);GO:0004175(endopeptidase activity);GO:0004298(threonine-type endopeptidase activity);GO:0005634(nucleus);GO:0005737(cytoplasm);GO:0005839(proteasome core complex);GO:0006508(proteolysis);GO:0008233(peptidase activity);GO:0010498(proteasomal protein catabolic process);GO:0010499(proteasomal ubiquitin-independent protein catabolic process);GO:0016787(hydrolase activit…	03050(Proteasome)	K02738	EC:3.4.25.1
3	ENSDARG00000045352	cst14a.2	2.33878	1.45333	0.686397	0.791	0.426	1.52619e-185	4.22938e-181	cystatin 14a, tandem duplicate 2 [Source:ZFIN;Acc:ZDB-GENE-040426-1065]	GO:0004866(endopeptidase inhibitor activity);GO:0004869(cysteine-type endopeptidase inhibitor activity);GO:0005622(intracellular);GO:0005829(cytosol);GO:0010951(negative regulation of endopeptidase activity)	NA	K13907	NA
3	ENSDARG00000056378	ifi30	0.802121	0.555796	0.529265	0.47	0.137	3.17485e-185	8.79814e-181	interferon, gamma-inducible protein 30 [Source:ZFIN;Acc:ZDB-GENE-030131-8447]	GO:0002376(immune system process);GO:0005576(extracellular region);GO:0005764(lysosome);GO:0016491(oxidoreductase activity);GO:0047134(protein-disulfide reductase activity);GO:0055114(oxidation-reduction process)	NA	NA	NA
3	ENSDARG00000034240	capza1a	4.05088	2.60014	0.639643	0.922	0.627	2.21883e-184	6.14881e-180	capping actin protein of muscle Z-line subunit alpha 1a [Source:ZFIN;Acc:ZDB-GENE-030131-5237]	GO:0003779(actin binding);GO:0008290(F-actin capping protein complex);GO:0030018(Z disc);GO:0030036(actin cytoskeleton organization);GO:0030479(actin cortical patch);GO:0051015(actin filament binding);GO:0051016(barbed-end actin filament capping);GO:0051693(actin filament capping)	04144(Endocytosis)	K10364	NA
3	ENSDARG00000033738	zgc:153867	9.58152	6.47841	0.564615	0.979	0.866	1.51299e-182	4.19279e-178	zgc:153867 [Source:ZFIN;Acc:ZDB-GENE-030131-9170]	GO:0005509(calcium ion binding)	04270(Vascular smooth muscle contraction);04530(Tight junction)	K12751	NA
3	ENSDARG00000036754	hmgn3	0.420424	0.309145	0.443561	0.259	0.032	1.5185e-181	4.20807e-177	high mobility group nucleosomal binding domain 3 [Source:ZFIN;Acc:ZDB-GENE-041114-180]	GO:0000785(chromatin);GO:0003682(chromatin binding);GO:0005634(nucleus);GO:0031492(nucleosomal DNA binding);GO:0045944(positive regulation of transcription by RNA polymerase II);GO:0061178(regulation of insulin secretion involved in cellular response to glucose stimulus)	NA	K11301	NA
3	ENSDARG00000027063	arpc1b	16.9415	12.0758	0.488448	0.996	0.961	2.57913e-181	7.14728e-177	actin related protein 2/3 complex, subunit 1B [Source:ZFIN;Acc:ZDB-GENE-030131-7414]	GO:0002574(thrombocyte differentiation);GO:0003779(actin binding);GO:0005515(protein binding);GO:0005737(cytoplasm);GO:0005856(cytoskeleton);GO:0005885(Arp2/3 protein complex);GO:0015629(actin cytoskeleton);GO:0030217(T cell differentiation);GO:0030833(regulation of actin filament polymerization);GO:0034314(Arp2/3 complex-mediated actin nucleation);GO:0051015(actin filament binding)	04144(Endocytosis);04810(Regulation of actin cytoskeleton);05132(Salmonella infection)	K05757	NA
3	ENSDARG00000026369	dbi	8.58628	5.13789	0.740857	0.948	0.722	3.18883e-181	8.83689e-177	diazepam binding inhibitor (GABA receptor modulator, acyl-CoA binding protein) [Source:ZFIN;Acc:ZDB-GENE-040426-1861]	GO:0000062(fatty-acyl-CoA binding);GO:0005575(cellular_component);GO:0008150(biological_process)	03320(PPAR signaling pathway)	K08762	NA
3	ENSDARG00000028106	glrx	3.72134	2.29494	0.697367	0.887	0.586	3.08381e-179	8.54584e-175	glutaredoxin (thioltransferase) [Source:ZFIN;Acc:ZDB-GENE-041010-11]	GO:0005575(cellular_component);GO:0005623(cell);GO:0009055(electron transfer activity);GO:0015035(protein disulfide oxidoreductase activity);GO:0022900(electron transport chain);GO:0045454(cell redox homeostasis);GO:0055114(oxidation-reduction process)	NA	K03676	NA
3	ENSDARG00000052712	suclg1	3.45179	2.1733	0.667459	0.877	0.535	1.22485e-178	3.39431e-174	succinate-CoA ligase, alpha subunit [Source:ZFIN;Acc:ZDB-GENE-040912-101]	GO:0000166(nucleotide binding);GO:0003824(catalytic activity);GO:0004550(nucleoside diphosphate kinase activity);GO:0004775(succinate-CoA ligase (ADP-forming) activity);GO:0004776(succinate-CoA ligase (GDP-forming) activity);GO:0005739(mitochondrion);GO:0005829(cytosol);GO:0006099(tricarboxylic acid cycle);GO:0006104(succinyl-CoA metabolic process);GO:0006105(succinate metabolic process);GO:00061…	00020(Citrate cycle (TCA cycle));00640(Propanoate metabolism)	K01899	6.2.1.5;EC:6.2.1.4
3	ENSDARG00000099420	nme2b.2	1.27593	0.839616	0.603745	0.509	0.172	1.5562e-178	4.31254e-174	NME/NM23 nucleoside diphosphate kinase 2b, tandem duplicate 2 [Source:ZFIN;Acc:ZDB-GENE-000210-33]	GO:0000166(nucleotide binding);GO:0004550(nucleoside diphosphate kinase activity);GO:0005524(ATP binding);GO:0006165(nucleoside diphosphate phosphorylation);GO:0006183(GTP biosynthetic process);GO:0006228(UTP biosynthetic process);GO:0006241(CTP biosynthetic process);GO:0016301(kinase activity);GO:0016310(phosphorylation);GO:0016740(transferase activity)	00230(Purine metabolism);00240(Pyrimidine metabolism);00983(Drug metabolism - other enzymes)	K00940	EC:2.7.4.6
3	ENSDARG00000033285	gsto2	1.58535	1.0441	0.602549	0.637	0.267	3.15052e-178	8.73072e-174	glutathione S-transferase omega 2 [Source:ZFIN;Acc:ZDB-GENE-041114-67]	GO:0004364(glutathione transferase activity);GO:0005515(protein binding);GO:0005737(cytoplasm);GO:0045174(glutathione dehydrogenase (ascorbate) activity);GO:0055114(oxidation-reduction process);GO:0098869(cellular oxidant detoxification)	00480(Glutathione metabolism);00980(Metabolism of xenobiotics by cytochrome P450);00982(Drug metabolism - cytochrome P450);00983(Drug metabolism - other enzymes)	K00799	EC:2.5.1.18
3	ENSDARG00000058079	txndc17	0.498851	0.377606	0.401725	0.353	0.08	1.79498e-176	4.97426e-172	thioredoxin domain containing 17 [Source:ZFIN;Acc:ZDB-GENE-040801-193]	GO:0005737(cytoplasm);GO:0005829(cytosol);GO:0047134(protein-disulfide reductase activity);GO:0055114(oxidation-reduction process)	NA	NA	NA
3	ENSDARG00000094578	epsti1	0.66581	0.533889	0.318571	0.403	0.131	3.7253e-176	1.03236e-171	epithelial stromal interaction 1 [Source:ZFIN;Acc:ZDB-GENE-081104-172]	GO:0005515(protein binding)	NA	NA	NA
3	ENSDARG00000022315	atp6v1g1	2.63973	1.76735	0.578801	0.846	0.484	7.07702e-176	1.96118e-171	ATPase H+ transporting V1 subunit G1 [Source:ZFIN;Acc:ZDB-GENE-030131-6965]	GO:0006811(ion transport);GO:0008553(proton-exporting ATPase activity, phosphorylative mechanism);GO:0016471(vacuolar proton-transporting V-type ATPase complex);GO:0042626(ATPase activity, coupled to transmembrane movement of substances);GO:1902600(proton transmembrane transport)	00190(Oxidative phosphorylation);04145(Phagosome);04150(mTOR signaling pathway)	K02152	NA
3	ENSDARG00000054588	cox6a2	4.85487	2.95601	0.715782	0.891	0.584	2.78126e-175	7.70741e-171	cytochrome c oxidase subunit 6A2 [Source:ZFIN;Acc:ZDB-GENE-040912-129]	GO:0004129(cytochrome-c oxidase activity);GO:0005739(mitochondrion);GO:0005743(mitochondrial inner membrane);GO:0005751(mitochondrial respiratory chain complex IV);GO:0006123(mitochondrial electron transport, cytochrome c to oxygen);GO:0009060(aerobic respiration);GO:0016020(membrane);GO:0030234(enzyme regulator activity);GO:0050790(regulation of catalytic activity);GO:1902600(proton transmembran…	00190(Oxidative phosphorylation);04260(Cardiac muscle contraction)	K02266	NA
3	ENSDARG00000036942	gpd1c	1.31687	0.909787	0.533511	0.659	0.289	3.0025e-174	8.32052e-170	glycerol-3-phosphate dehydrogenase 1c [Source:ZFIN;Acc:ZDB-GENE-040426-2576]	GO:0004367(glycerol-3-phosphate dehydrogenase [NAD+] activity);GO:0005829(cytosol);GO:0005975(carbohydrate metabolic process);GO:0006072(glycerol-3-phosphate metabolic process);GO:0009331(glycerol-3-phosphate dehydrogenase complex);GO:0016491(oxidoreductase activity);GO:0016616(oxidoreductase activity, acting on the CH-OH group of donors, NAD or NADP as acceptor);GO:0042803(protein homodimerizati…	00564(Glycerophospholipid metabolism)	K00006	EC:1.1.1.8
3	ENSDARG00000054696	psmb4	1.6328	1.08357	0.591556	0.708	0.335	1.70518e-173	4.7254e-169	proteasome subunit beta 4 [Source:ZFIN;Acc:ZDB-GENE-050417-333]	GO:0000502(proteasome complex);GO:0004175(endopeptidase activity);GO:0004298(threonine-type endopeptidase activity);GO:0005634(nucleus);GO:0005737(cytoplasm);GO:0005839(proteasome core complex);GO:0006508(proteolysis);GO:0008233(peptidase activity);GO:0010498(proteasomal protein catabolic process);GO:0010499(proteasomal ubiquitin-independent protein catabolic process);GO:0016787(hydrolase activit…	03050(Proteasome)	K02736	EC:3.4.25.1
3	ENSDARG00000030694	atp6v1e1b	1.19434	0.789102	0.59793	0.58	0.224	8.22147e-173	2.27833e-168	ATPase H+ transporting V1 subunit E1b [Source:ZFIN;Acc:ZDB-GENE-020419-11]	GO:0008900(potassium:proton exchanging ATPase activity);GO:0015991(ATP hydrolysis coupled proton transport);GO:0031101(fin regeneration);GO:0033178(proton-transporting two-sector ATPase complex, catalytic domain);GO:0033336(caudal fin development);GO:0046961(proton-transporting ATPase activity, rotational mechanism);GO:0060036(notochord cell vacuolation);GO:0060041(retina development in camera-ty…	00190(Oxidative phosphorylation);04145(Phagosome);04150(mTOR signaling pathway)	K02150	NA
3	ENSDARG00000008748	ube2na	1.33126	0.958021	0.474661	0.661	0.3	1.39042e-172	3.85314e-168	ubiquitin-conjugating enzyme E2Na [Source:ZFIN;Acc:ZDB-GENE-040426-2873]	GO:0000166(nucleotide binding);GO:0000209(protein polyubiquitination);GO:0005524(ATP binding);GO:0005634(nucleus);GO:0006301(postreplication repair);GO:0016740(transferase activity);GO:0042769(DNA damage response, detection of DNA damage);GO:0061631(ubiquitin conjugating enzyme activity);GO:0070534(protein K63-linked ubiquitination)	04120(Ubiquitin mediated proteolysis)	K10580	EC:2.3.2.23
3	ENSDARG00000018587	zgc:152658	0.267459	0.221366	0.272887	0.209	0.024	2.31152e-172	6.40567e-168	zgc:152658 [Source:ZFIN;Acc:ZDB-GENE-060929-68]	GO:0005525(GTP binding);GO:0005575(cellular_component);GO:0008150(biological_process)	NA	NA	NA
3	ENSDARG00000054610	coro1a	12.4027	8.82918	0.490301	0.991	0.939	6.47973e-172	1.79566e-167	coronin, actin binding protein, 1A [Source:ZFIN;Acc:ZDB-GENE-030131-9512]	GO:0001654(eye development);GO:0005515(protein binding);GO:0007420(brain development);GO:0021952(central nervous system projection neuron axonogenesis)	04145(Phagosome)	K13882	NA
3	ENSDARG00000099325	gig2i	1.06617	0.734139	0.538316	0.548	0.203	3.12568e-170	8.66188e-166	grass carp reovirus (GCRV)-induced gene 2i [Source:ZFIN;Acc:ZDB-GENE-120409-1]	GO:0003950(NAD+ ADP-ribosyltransferase activity);GO:0005737(cytoplasm);GO:0051607(defense response to virus)	NA	NA	NA
3	ENSDARG00000092731	mhc1uka	1.48598	0.942462	0.656904	0.575	0.223	3.38412e-169	9.37808e-165	major histocompatibility complex class I UKA [Source:ZFIN;Acc:ZDB-GENE-060825-152]	GO:0005615(extracellular space);GO:0005886(plasma membrane);GO:0006955(immune response);GO:0009897(external side of plasma membrane);GO:0016020(membrane);GO:0016021(integral component of membrane)	NA	NA	NA
3	ENSDARG00000021582	dynlrb1	1.30457	0.933686	0.482569	0.665	0.306	2.3572e-168	6.53228e-164	dynein, light chain, roadblock-type 1 [Source:ZFIN;Acc:ZDB-GENE-040426-989]	GO:0003774(motor activity);GO:0005737(cytoplasm);GO:0005856(cytoskeleton);GO:0005868(cytoplasmic dynein complex);GO:0005874(microtubule);GO:0007018(microtubule-based movement);GO:0007179(transforming growth factor beta receptor signaling pathway);GO:0030286(dynein complex);GO:0036157(outer dynein arm);GO:0045505(dynein intermediate chain binding)	NA	K10419	NA
3	ENSDARG00000033144	psme2	2.44133	1.62667	0.58575	0.809	0.448	4.66452e-168	1.29263e-163	proteasome activator subunit 2 [Source:ZFIN;Acc:ZDB-GENE-991110-16]	GO:0000502(proteasome complex);GO:0005654(nucleoplasm);GO:0005737(cytoplasm);GO:0008537(proteasome activator complex);GO:0010950(positive regulation of endopeptidase activity);GO:0061133(endopeptidase activator activity);GO:0061136(regulation of proteasomal protein catabolic process);GO:2000045(regulation of G1/S transition of mitotic cell cycle)	03050(Proteasome)	K06697	NA
3	ENSDARG00000075643	ifi35	1.13339	0.848549	0.417575	0.567	0.236	8.31706e-168	2.30482e-163	interferon-induced protein 35 [Source:ZFIN;Acc:ZDB-GENE-100311-2]	NA	NA	NA	NA
3	ENSDARG00000022438	cox6a1	4.14376	2.69673	0.619728	0.921	0.664	1.00061e-167	2.7729e-163	cytochrome c oxidase subunit 6A1 [Source:ZFIN;Acc:ZDB-GENE-030131-7715]	GO:0004129(cytochrome-c oxidase activity);GO:0005739(mitochondrion);GO:0005743(mitochondrial inner membrane);GO:0005751(mitochondrial respiratory chain complex IV);GO:0006123(mitochondrial electron transport, cytochrome c to oxygen);GO:0009060(aerobic respiration);GO:0016020(membrane);GO:0030234(enzyme regulator activity);GO:0050790(regulation of catalytic activity);GO:1902600(proton transmembran…	00190(Oxidative phosphorylation);04260(Cardiac muscle contraction)	K02266	NA
3	ENSDARG00000043781	psmb10	0.969796	0.686593	0.498226	0.552	0.211	3.03078e-167	8.39891e-163	proteasome subunit beta 10 [Source:ZFIN;Acc:ZDB-GENE-040718-278]	GO:0000502(proteasome complex);GO:0002376(immune system process);GO:0004175(endopeptidase activity);GO:0004298(threonine-type endopeptidase activity);GO:0005634(nucleus);GO:0005737(cytoplasm);GO:0005839(proteasome core complex);GO:0006508(proteolysis);GO:0008233(peptidase activity);GO:0010498(proteasomal protein catabolic process);GO:0010499(proteasomal ubiquitin-independent protein catabolic pro…	03050(Proteasome)	K02739	EC:3.4.25.1
3	ENSDARG00000041921	hsbp1b	1.44044	1.01423	0.506121	0.684	0.32	3.88625e-167	1.07696e-162	heat shock factor binding protein 1b [Source:ZFIN;Acc:ZDB-GENE-040426-1721]	GO:0003714(transcription corepressor activity);GO:0007417(central nervous system development);GO:0014029(neural crest formation);GO:1903507(negative regulation of nucleic acid-templated transcription)	NA	NA	NA
3	ENSDARG00000033466	tagln2	6.56997	4.32644	0.602705	0.969	0.784	1.1967e-166	3.31628e-162	transgelin 2 [Source:ZFIN;Acc:ZDB-GENE-020802-2]	GO:0000902(cell morphogenesis);GO:0005515(protein binding);GO:0015629(actin cytoskeleton);GO:0030036(actin cytoskeleton organization)	NA	K20526	NA
3	ENSDARG00000035326	nccrp1	19.6882	13.2742	0.568713	0.991	0.943	2.26549e-166	6.27812e-162	non-specific cytotoxic cell receptor protein 1 [Source:ZFIN;Acc:ZDB-GENE-000210-13]	GO:0005737(cytoplasm)	NA	NA	NA
3	ENSDARG00000011376	dnase1l4.2	1.02441	0.70328	0.542618	0.539	0.199	1.317e-164	3.64968e-160	deoxyribonuclease 1 like 4, tandem duplicate 2 [Source:ZFIN;Acc:ZDB-GENE-040426-1884]	GO:0000737(DNA catabolic process, endonucleolytic);GO:0003677(DNA binding);GO:0004518(nuclease activity);GO:0004519(endonuclease activity);GO:0004530(deoxyribonuclease I activity);GO:0004536(deoxyribonuclease activity);GO:0005634(nucleus);GO:0006308(DNA catabolic process);GO:0016787(hydrolase activity)	NA	NA	NA
3	ENSDARG00000015343	pgd	4.13809	2.70378	0.613989	0.922	0.649	3.67471e-164	1.01834e-159	phosphogluconate dehydrogenase [Source:ZFIN;Acc:ZDB-GENE-040426-2807]	GO:0004616(phosphogluconate dehydrogenase (decarboxylating) activity);GO:0006098(pentose-phosphate shunt);GO:0016491(oxidoreductase activity);GO:0019521(D-gluconate metabolic process);GO:0050661(NADP binding);GO:0055114(oxidation-reduction process)	00030(Pentose phosphate pathway);00480(Glutathione metabolism)	K00033	1.1.1.343;EC:1.1.1.44
3	ENSDARG00000002240	psmb6	1.45888	1.0054	0.537096	0.686	0.326	5.37188e-162	1.48865e-157	proteasome subunit beta 6 [Source:ZFIN;Acc:ZDB-GENE-990415-216]	GO:0000502(proteasome complex);GO:0004175(endopeptidase activity);GO:0004298(threonine-type endopeptidase activity);GO:0005634(nucleus);GO:0005737(cytoplasm);GO:0005839(proteasome core complex);GO:0006508(proteolysis);GO:0008233(peptidase activity);GO:0010498(proteasomal protein catabolic process);GO:0010499(proteasomal ubiquitin-independent protein catabolic process);GO:0016787(hydrolase activit…	03050(Proteasome)	K02738	EC:3.4.25.1
3	ENSDARG00000094300	nupr1a	1.29164	0.865584	0.577453	0.605	0.254	8.07605e-162	2.23804e-157	nuclear protein 1a [Source:ZFIN;Acc:ZDB-GENE-070705-255]	GO:0005634(nucleus);GO:0008285(negative regulation of cell population proliferation);GO:0045786(negative regulation of cell cycle)	NA	NA	NA
3	ENSDARG00000013938	psmb3	1.82695	1.18437	0.625309	0.701	0.343	6.56069e-161	1.8181e-156	proteasome subunit beta 3 [Source:ZFIN;Acc:ZDB-GENE-040426-2682]	GO:0000502(proteasome complex);GO:0004175(endopeptidase activity);GO:0004298(threonine-type endopeptidase activity);GO:0005634(nucleus);GO:0005737(cytoplasm);GO:0005839(proteasome core complex);GO:0006508(proteolysis);GO:0008233(peptidase activity);GO:0010498(proteasomal protein catabolic process);GO:0010499(proteasomal ubiquitin-independent protein catabolic process);GO:0016787(hydrolase activit…	03050(Proteasome)	K02735	EC:3.4.25.1
3	ENSDARG00000057698	ctsd	1.80501	1.30811	0.464523	0.711	0.359	1.70277e-160	4.71871e-156	cathepsin D [Source:ZFIN;Acc:ZDB-GENE-010131-8]	GO:0003406(retinal pigment epithelium development);GO:0004190(aspartic-type endopeptidase activity);GO:0005764(lysosome);GO:0006508(proteolysis);GO:0008233(peptidase activity);GO:0009617(response to bacterium);GO:0016787(hydrolase activity);GO:0030163(protein catabolic process);GO:0061061(muscle structure development)	04140(Autophagy - animal);04142(Lysosome);04210(Apoptosis)	K01379	EC:3.4.23.5
3	ENSDARG00000056600	papss2b	3.34452	2.10455	0.668289	0.837	0.515	4.48103e-160	1.24178e-155	3'-phosphoadenosine 5'-phosphosulfate synthase 2b [Source:ZFIN;Acc:ZDB-GENE-010323-5]	GO:0000103(sulfate assimilation);GO:0004020(adenylylsulfate kinase activity);GO:0004781(sulfate adenylyltransferase (ATP) activity);GO:0005524(ATP binding);GO:0016310(phosphorylation);GO:0016779(nucleotidyltransferase activity);GO:0050428(3'-phosphoadenosine 5'-phosphosulfate biosynthetic process)	00230(Purine metabolism);00450(Selenocompound metabolism);00920(Sulfur metabolism)	K13811	2.7.1.25;EC:2.7.7.4
3	ENSDARG00000053484	syne2b	1.29797	0.937367	0.469572	0.582	0.247	6.31569e-160	1.7502e-155	spectrin repeat containing, nuclear envelope 2b [Source:ZFIN;Acc:ZDB-GENE-071218-5]	GO:0003779(actin binding);GO:0005515(protein binding);GO:0005635(nuclear envelope);GO:0016020(membrane);GO:0016021(integral component of membrane);GO:0034993(meiotic nuclear membrane microtubule tethering complex);GO:0051015(actin filament binding);GO:0090286(cytoskeletal anchoring at nuclear membrane)	NA	NA	NA
3	ENSDARG00000099313	naga	1.30788	0.95941	0.447011	0.66	0.312	1.1642e-159	3.22623e-155	N-acetylgalactosaminidase, alpha [Source:ZFIN;Acc:ZDB-GENE-051113-256]	GO:0003824(catalytic activity);GO:0004553(hydrolase activity, hydrolyzing O-glycosyl compounds);GO:0004557(alpha-galactosidase activity);GO:0005737(cytoplasm);GO:0005975(carbohydrate metabolic process);GO:0008152(metabolic process);GO:0009311(oligosaccharide metabolic process);GO:0016139(glycoside catabolic process);GO:0016787(hydrolase activity);GO:0016798(hydrolase activity, acting on glycosyl …	00603(Glycosphingolipid biosynthesis - globo and isoglobo series);04142(Lysosome)	K01204	EC:3.2.1.49
3	ENSDARG00000103979	calr3a	1.27066	0.785269	0.694321	0.52	0.197	1.94345e-159	5.3857e-155	calreticulin 3a [Source:ZFIN;Acc:ZDB-GENE-000208-17]	GO:0005509(calcium ion binding);GO:0005515(protein binding);GO:0005783(endoplasmic reticulum);GO:0006457(protein folding);GO:0046872(metal ion binding);GO:0051082(unfolded protein binding)	04141(Protein processing in endoplasmic reticulum);04145(Phagosome);05168(Herpes simplex virus 1 infection)	K08057	NA
3	ENSDARG00000004956	zmat2	0.93094	0.712087	0.386636	0.544	0.227	1.55861e-158	4.31923e-154	zinc finger, matrin-type 2 [Source:ZFIN;Acc:ZDB-GENE-030131-3197]	GO:0000398(mRNA splicing, via spliceosome);GO:0003676(nucleic acid binding);GO:0005681(spliceosomal complex);GO:0008270(zinc ion binding);GO:0046540(U4/U6 x U5 tri-snRNP complex);GO:0046872(metal ion binding)	03040(Spliceosome)	K12848	NA
3	ENSDARG00000089463	dhx58	0.802837	0.609618	0.397202	0.382	0.116	4.7338e-158	1.31183e-153	DEXH (Asp-Glu-X-His) box polypeptide 58 [Source:ZFIN;Acc:ZDB-GENE-120612-3]	GO:0003677(DNA binding);GO:0004386(helicase activity);GO:0005524(ATP binding);GO:0016787(hydrolase activity)	04622(RIG-I-like receptor signaling pathway)	K12649	EC:3.6.4.13
3	ENSDARG00000035329	capns1a	1.35546	0.974335	0.476291	0.681	0.329	1.04211e-157	2.88789e-153	calpain, small subunit 1 a [Source:ZFIN;Acc:ZDB-GENE-030113-3]	GO:0005509(calcium ion binding)	NA	K08583	NA
3	ENSDARG00000023214	mob2a	0.359167	0.280772	0.355259	0.235	0.033	1.23555e-157	3.42395e-153	MOB kinase activator 2a [Source:ZFIN;Acc:ZDB-GENE-040718-56]	GO:0005575(cellular_component);GO:0008150(biological_process)	NA	NA	NA
3	ENSDARG00000103444	gig2h	0.976383	0.724078	0.431302	0.536	0.213	2.18738e-157	6.06167e-153	grass carp reovirus (GCRV)-induced gene 2h [Source:ZFIN;Acc:ZDB-GENE-130517-5]	GO:0003950(NAD+ ADP-ribosyltransferase activity);GO:0005737(cytoplasm)	NA	NA	NA
3	ENSDARG00000001303	psmb8a	2.36417	1.46961	0.685894	0.732	0.388	2.31431e-157	6.41342e-153	proteasome subunit beta 8A [Source:ZFIN;Acc:ZDB-GENE-990415-141]	GO:0000502(proteasome complex);GO:0004175(endopeptidase activity);GO:0004298(threonine-type endopeptidase activity);GO:0005634(nucleus);GO:0005737(cytoplasm);GO:0005839(proteasome core complex);GO:0006508(proteolysis);GO:0008233(peptidase activity);GO:0010498(proteasomal protein catabolic process);GO:0010499(proteasomal ubiquitin-independent protein catabolic process);GO:0016787(hydrolase activit…	03050(Proteasome)	K02740	EC:3.4.25.1
3	ENSDARG00000009640	psmb1	1.5772	1.06586	0.565347	0.688	0.332	6.37754e-157	1.76734e-152	proteasome subunit beta 1 [Source:ZFIN;Acc:ZDB-GENE-040618-2]	GO:0000502(proteasome complex);GO:0004175(endopeptidase activity);GO:0004298(threonine-type endopeptidase activity);GO:0005634(nucleus);GO:0005737(cytoplasm);GO:0005839(proteasome core complex);GO:0006508(proteolysis);GO:0008233(peptidase activity);GO:0010498(proteasomal protein catabolic process);GO:0010499(proteasomal ubiquitin-independent protein catabolic process);GO:0016787(hydrolase activit…	03050(Proteasome)	K02732	EC:3.4.25.1
3	ENSDARG00000075536	cpne1	1.24294	0.889751	0.482286	0.621	0.277	2.76872e-156	7.67266e-152	copine I [Source:ZFIN;Acc:ZDB-GENE-030131-3562]	GO:0005544(calcium-dependent phospholipid binding);GO:0005886(plasma membrane);GO:0043122(regulation of I-kappaB kinase/NF-kappaB signaling);GO:0071277(cellular response to calcium ion);GO:1903265(positive regulation of tumor necrosis factor-mediated signaling pathway)	NA	NA	NA
3	ENSDARG00000044092	atp5if1b	3.23862	2.12177	0.610114	0.873	0.567	2.99453e-156	8.29845e-152	ATP synthase inhibitory factor subunit 1b [Source:ZFIN;Acc:ZDB-GENE-050506-113]	GO:0005739(mitochondrion);GO:0006783(heme biosynthetic process);GO:0030218(erythrocyte differentiation);GO:0032780(negative regulation of ATPase activity);GO:0042030(ATPase inhibitor activity);GO:0042803(protein homodimerization activity);GO:0043009(chordate embryonic development);GO:0051117(ATPase binding);GO:0051289(protein homotetramerization);GO:0051346(negative regulation of hydrolase activi…	NA	K22255	NA
3	ENSDARG00000019062	arpc5b	2.49346	1.72521	0.531377	0.828	0.484	5.40289e-156	1.49725e-151	actin related protein 2/3 complex, subunit 5B [Source:ZFIN;Acc:ZDB-GENE-040120-7]	GO:0005737(cytoplasm);GO:0005856(cytoskeleton);GO:0005885(Arp2/3 protein complex);GO:0015629(actin cytoskeleton);GO:0016477(cell migration);GO:0030833(regulation of actin filament polymerization);GO:0034314(Arp2/3 complex-mediated actin nucleation);GO:0051015(actin filament binding)	04144(Endocytosis);04810(Regulation of actin cytoskeleton);05132(Salmonella infection)	K05754	NA
3	ENSDARG00000087012	BX004816.2	0.524892	0.373531	0.490793	0.237	0.032	9.42132e-155	2.61084e-150	NA	GO:0005525(GTP binding);GO:0016020(membrane);GO:0016021(integral component of membrane)	NA	NA	NA
3	ENSDARG00000008678	snx3	0.936643	0.738325	0.343244	0.556	0.248	2.25316e-154	6.24396e-150	sorting nexin 3 [Source:ZFIN;Acc:ZDB-GENE-030131-921]	GO:0006783(heme biosynthetic process);GO:0030218(erythrocyte differentiation);GO:0035091(phosphatidylinositol binding);GO:0042541(hemoglobin biosynthetic process)	04144(Endocytosis)	K17918	NA
3	ENSDARG00000111785	trappc2l	0.606616	0.462476	0.391404	0.417	0.133	2.40923e-153	6.67645e-149	trafficking protein particle complex 2-like [Source:ZFIN;Acc:ZDB-GENE-040801-249]	GO:0003674(molecular_function);GO:0005622(intracellular);GO:0005737(cytoplasm);GO:0006888(endoplasmic reticulum to Golgi vesicle-mediated transport)	NA	K20301	NA
3	ENSDARG00000040076	pycard	1.03784	0.731667	0.504325	0.538	0.21	5.42665e-153	1.50383e-148	PYD and CARD domain containing [Source:ZFIN;Acc:ZDB-GENE-000511-2]	GO:0004197(cysteine-type endopeptidase activity);GO:0006508(proteolysis);GO:0006954(inflammatory response);GO:0042981(regulation of apoptotic process);GO:0045087(innate immune response)	04217(Necroptosis);04621(NOD-like receptor signaling pathway);04623(Cytosolic DNA-sensing pathway);04625(C-type lectin receptor signaling pathway);05132(Salmonella infection)	K12799	NA
3	ENSDARG00000071065	g6pd	2.07279	1.51496	0.452288	0.749	0.404	7.6693e-153	2.12532e-148	glucose-6-phosphate dehydrogenase [Source:ZFIN;Acc:ZDB-GENE-070508-4]	GO:0004345(glucose-6-phosphate dehydrogenase activity);GO:0005975(carbohydrate metabolic process);GO:0006006(glucose metabolic process);GO:0006098(pentose-phosphate shunt);GO:0016491(oxidoreductase activity);GO:0050661(NADP binding);GO:0055114(oxidation-reduction process);GO:0090504(epiboly)	00030(Pentose phosphate pathway);00480(Glutathione metabolism)	K00036	1.1.1.363;EC:1.1.1.49
3	ENSDARG00000103551	rnf213b	1.37138	0.980052	0.4847	0.538	0.219	1.89932e-152	5.26339e-148	ring finger protein 213b [Source:ZFIN;Acc:ZDB-GENE-110822-1]	GO:0004842(ubiquitin-protein transferase activity);GO:0016567(protein ubiquitination);GO:0016887(ATPase activity)	NA	K22754	EC:2.3.2.27
3	ENSDARG00000040121	psma2	1.3548	0.96938	0.482947	0.671	0.323	1.39545e-151	3.86706e-147	proteasome subunit alpha 2 [Source:ZFIN;Acc:ZDB-GENE-050522-479]	GO:0000502(proteasome complex);GO:0004175(endopeptidase activity);GO:0004298(threonine-type endopeptidase activity);GO:0005634(nucleus);GO:0005737(cytoplasm);GO:0005839(proteasome core complex);GO:0006508(proteolysis);GO:0006511(ubiquitin-dependent protein catabolic process);GO:0008233(peptidase activity);GO:0010498(proteasomal protein catabolic process);GO:0010499(proteasomal ubiquitin-independe…	03050(Proteasome)	K02726	EC:3.4.25.1
3	ENSDARG00000028559	march5l	0.834553	0.677996	0.299726	0.533	0.24	2.73806e-150	7.58772e-146	membrane-associated ring finger (C3HC4) 5, like [Source:ZFIN;Acc:ZDB-GENE-030131-4792]	GO:0004842(ubiquitin-protein transferase activity);GO:0005739(mitochondrion);GO:0005741(mitochondrial outer membrane);GO:0005783(endoplasmic reticulum);GO:0005789(endoplasmic reticulum membrane);GO:0008270(zinc ion binding);GO:0016020(membrane);GO:0016021(integral component of membrane);GO:0016567(protein ubiquitination);GO:0016740(transferase activity);GO:0046872(metal ion binding);GO:0051865(pr…	NA	K10660	EC:2.3.2.27
3	ENSDARG00000013443	atp6v1ba	0.927999	0.678647	0.451461	0.515	0.201	6.02376e-150	1.6693e-145	ATPase, H+ transporting, lysosomal, V1 subunit B, member a [Source:ZFIN;Acc:ZDB-GENE-030711-3]	GO:0005524(ATP binding);GO:0015991(ATP hydrolysis coupled proton transport);GO:0033180(proton-transporting V-type ATPase, V1 domain);GO:0046034(ATP metabolic process);GO:1902600(proton transmembrane transport)	00190(Oxidative phosphorylation);04145(Phagosome);04150(mTOR signaling pathway)	K02147	NA
3	ENSDARG00000016350	cap1	1.39934	1.10467	0.34113	0.687	0.362	1.39083e-149	3.85425e-145	CAP, adenylate cyclase-associated protein 1 (yeast) [Source:ZFIN;Acc:ZDB-GENE-030131-6459]	GO:0000902(cell morphogenesis);GO:0001756(somitogenesis);GO:0003779(actin binding);GO:0007010(cytoskeleton organization);GO:0007163(establishment or maintenance of cell polarity);GO:0007190(activation of adenylate cyclase activity);GO:0008078(mesodermal cell migration);GO:0008154(actin polymerization or depolymerization);GO:0008179(adenylate cyclase binding);GO:0030036(actin cytoskeleton organiza…	NA	K17261	NA
3	ENSDARG00000045661	irf7	2.19948	1.52808	0.525442	0.729	0.385	6.17451e-147	1.71108e-142	interferon regulatory factor 7 [Source:ZFIN;Acc:ZDB-GENE-040426-1518]	GO:0000981(DNA-binding transcription factor activity, RNA polymerase II-specific);GO:0002376(immune system process);GO:0003700(DNA-binding transcription factor activity);GO:0005515(protein binding);GO:0005634(nucleus);GO:0006355(regulation of transcription, DNA-templated);GO:0006357(regulation of transcription by RNA polymerase II);GO:0009615(response to virus);GO:0030097(hemopoiesis);GO:0044212(…	04620(Toll-like receptor signaling pathway);04621(NOD-like receptor signaling pathway);04622(RIG-I-like receptor signaling pathway);04623(Cytosolic DNA-sensing pathway);05168(Herpes simplex virus 1 infection)	K09447	NA
3	ENSDARG00000037153	atp6ap1b	1.32376	1.02084	0.374892	0.658	0.334	6.9273e-147	1.91969e-142	ATPase H+ transporting accessory protein 1b [Source:ZFIN;Acc:ZDB-GENE-020423-2]	GO:0003140(determination of left/right asymmetry in lateral mesoderm);GO:0003406(retinal pigment epithelium development);GO:0005886(plasma membrane);GO:0008057(eye pigment granule organization);GO:0015991(ATP hydrolysis coupled proton transport);GO:0030641(regulation of cellular pH);GO:0032438(melanosome organization);GO:0033180(proton-transporting V-type ATPase, V1 domain);GO:0033181(plasma memb…	00190(Oxidative phosphorylation);04142(Lysosome);04145(Phagosome)	K03662	NA
3	ENSDARG00000019033	tmem59	1.41198	1.08616	0.378487	0.681	0.353	3.1172e-146	8.63839e-142	transmembrane protein 59 [Source:ZFIN;Acc:ZDB-GENE-070912-397]	GO:0016020(membrane);GO:0016021(integral component of membrane)	NA	NA	NA
3	ENSDARG00000055900	zswim5	0.451435	0.365507	0.304619	0.286	0.071	4.74473e-146	1.31486e-141	zinc finger, SWIM-type containing 5 [Source:ZFIN;Acc:ZDB-GENE-030925-30]	GO:0031462(Cul2-RING ubiquitin ligase complex);GO:1902667(regulation of axon guidance)	NA	NA	NA
3	ENSDARG00000016527	helz2	1.10996	0.91059	0.28563	0.476	0.202	2.40859e-145	6.67468e-141	helicase with zinc finger 2, transcriptional coactivator [Source:ZFIN;Acc:ZDB-GENE-120920-1]	GO:0003723(RNA binding);GO:0004540(ribonuclease activity);GO:0030374(nuclear receptor transcription coactivator activity);GO:0090501(RNA phosphodiester bond hydrolysis);GO:1903508(positive regulation of nucleic acid-templated transcription)	NA	NA	NA
3	ENSDARG00000116058	rhoac	1.88413	1.42004	0.407959	0.782	0.45	4.39137e-145	1.21694e-140	ras homolog gene family, member Ac [Source:ZFIN;Acc:ZDB-GENE-040426-2665]	GO:0000166(nucleotide binding);GO:0003924(GTPase activity);GO:0005525(GTP binding);GO:0005622(intracellular);GO:0005737(cytoplasm);GO:0005886(plasma membrane);GO:0005938(cell cortex);GO:0007015(actin filament organization);GO:0007264(small GTPase mediated signal transduction);GO:0007266(Rho protein signal transduction);GO:0008360(regulation of cell shape);GO:0016020(membrane);GO:0016477(cell migr…	04144(Endocytosis);04150(mTOR signaling pathway);04270(Vascular smooth muscle contraction);04310(Wnt signaling pathway);04350(TGF-beta signaling pathway);04510(Focal adhesion);04520(Adherens junction);04530(Tight junction);04621(NOD-like receptor signaling pathway);04625(C-type lectin receptor signaling pathway);04810(Regulation of actin cytoskeleton)	K04513	NA
3	ENSDARG00000103919	si:ch73-1a9.3	5.98578	3.68639	0.69933	0.907	0.67	1.32721e-144	3.67795e-140	si:ch73-1a9.3 [Source:ZFIN;Acc:ZDB-GENE-141216-84]	GO:0000785(chromatin);GO:0005634(nucleus);GO:0031492(nucleosomal DNA binding)	NA	NA	NA
3	ENSDARG00000070834	taf13	0.513508	0.410485	0.323059	0.366	0.116	2.49112e-144	6.9034e-140	TATA-box binding protein associated factor 13 [Source:ZFIN;Acc:ZDB-GENE-030131-2873]	GO:0003677(DNA binding);GO:0003712(transcription coregulator activity);GO:0005669(transcription factor TFIID complex);GO:0006357(regulation of transcription by RNA polymerase II);GO:0006366(transcription by RNA polymerase II);GO:0046982(protein heterodimerization activity)	03022(Basal transcription factors)	K03127	NA
3	ENSDARG00000058593	sri	8.90873	5.95045	0.582221	0.988	0.864	6.9877e-144	1.93643e-139	sorcin [Source:ZFIN;Acc:ZDB-GENE-040426-1356]	GO:0005509(calcium ion binding)	NA	NA	NA
3	ENSDARG00000056008	atp5mc1	2.32626	1.52991	0.604571	0.762	0.44	5.89333e-143	1.63316e-138	ATP synthase membrane subunit c locus 1 [Source:ZFIN;Acc:ZDB-GENE-040426-1966]	GO:0000276(mitochondrial proton-transporting ATP synthase complex, coupling factor F(o));GO:0006811(ion transport);GO:0008289(lipid binding);GO:0015078(proton transmembrane transporter activity);GO:0015986(ATP synthesis coupled proton transport);GO:0015991(ATP hydrolysis coupled proton transport);GO:0016020(membrane);GO:0016021(integral component of membrane);GO:0033177(proton-transporting two-se…	00190(Oxidative phosphorylation)	K02128	NA
3	ENSDARG00000061845	pld7	1.60675	1.21183	0.406948	0.678	0.352	1.03159e-142	2.85875e-138	phospholipase D family, member 7 [Source:ZFIN;Acc:ZDB-GENE-030219-75]	GO:0003824(catalytic activity);GO:0016020(membrane);GO:0016021(integral component of membrane)	NA	NA	NA
3	ENSDARG00000102929	zgc:101715	0.489652	0.380617	0.363417	0.31	0.078	1.71549e-141	4.75397e-137	zgc:101715 [Source:ZFIN;Acc:ZDB-GENE-040912-59]	GO:0003674(molecular_function);GO:0005575(cellular_component);GO:0008150(biological_process)	NA	NA	NA
3	ENSDARG00000056874	lygl1	5.65436	3.26394	0.792749	0.805	0.485	2.53226e-141	7.0174e-137	lysozyme g-like 1 [Source:ZFIN;Acc:ZDB-GENE-040718-461]	GO:0003796(lysozyme activity);GO:0005575(cellular_component);GO:0008152(metabolic process);GO:0009253(peptidoglycan catabolic process);GO:0016787(hydrolase activity);GO:0016798(hydrolase activity, acting on glycosyl bonds);GO:0016998(cell wall macromolecule catabolic process)	NA	NA	NA
3	ENSDARG00000010113	ndufb8	1.75791	1.28852	0.448142	0.761	0.426	8.96201e-141	2.48355e-136	NADH:ubiquinone oxidoreductase subunit B8 [Source:ZFIN;Acc:ZDB-GENE-040426-1858]	GO:0003954(NADH dehydrogenase activity);GO:0005739(mitochondrion);GO:0005743(mitochondrial inner membrane);GO:0005747(mitochondrial respiratory chain complex I);GO:0006120(mitochondrial electron transport, NADH to ubiquinone);GO:0008137(NADH dehydrogenase (ubiquinone) activity);GO:0016020(membrane);GO:0016021(integral component of membrane);GO:0055114(oxidation-reduction process);GO:0070469(respi…	00190(Oxidative phosphorylation)	K03964	NA
3	ENSDARG00000070623	med10	0.594	0.47549	0.321048	0.413	0.152	1.61888e-140	4.48623e-136	mediator complex subunit 10 [Source:ZFIN;Acc:ZDB-GENE-070117-2423]	GO:0003712(transcription coregulator activity);GO:0005634(nucleus);GO:0006357(regulation of transcription by RNA polymerase II);GO:0007275(multicellular organism development);GO:0007507(heart development);GO:0016055(Wnt signaling pathway);GO:0016592(mediator complex);GO:0036302(atrioventricular canal development);GO:0045944(positive regulation of transcription by RNA polymerase II);GO:1905072(car…	NA	K15151	NA
3	ENSDARG00000087636	hmgn6	3.13503	2.09799	0.579472	0.85	0.554	2.59184e-140	7.18252e-136	high mobility group nucleosome binding domain 6 [Source:ZFIN;Acc:ZDB-GENE-030131-1005]	GO:0000785(chromatin);GO:0003682(chromatin binding);GO:0005634(nucleus);GO:0031492(nucleosomal DNA binding);GO:0045944(positive regulation of transcription by RNA polymerase II);GO:0061178(regulation of insulin secretion involved in cellular response to glucose stimulus)	NA	K11299	NA
3	ENSDARG00000101334	ctsc	0.847829	0.673846	0.331354	0.483	0.205	9.51241e-140	2.63608e-135	cathepsin C [Source:ZFIN;Acc:ZDB-GENE-030619-9]	GO:0004197(cysteine-type endopeptidase activity);GO:0005615(extracellular space);GO:0005764(lysosome);GO:0006508(proteolysis);GO:0008233(peptidase activity);GO:0008234(cysteine-type peptidase activity);GO:0016787(hydrolase activity);GO:0051603(proteolysis involved in cellular protein catabolic process)	04142(Lysosome);04210(Apoptosis)	K01275	EC:3.4.14.1
3	ENSDARG00000061177	mov10b.1	0.578472	0.458525	0.335246	0.381	0.127	1.45671e-139	4.03683e-135	Moloney leukemia virus 10b, tandem duplicate 1 [Source:ZFIN;Acc:ZDB-GENE-030131-9089]	GO:0000166(nucleotide binding);GO:0000932(P-body);GO:0003723(RNA binding);GO:0004386(helicase activity);GO:0005524(ATP binding);GO:0005737(cytoplasm);GO:0005829(cytosol);GO:0016787(hydrolase activity);GO:0031047(gene silencing by RNA);GO:0032575(ATP-dependent 5'-3' RNA helicase activity);GO:0035194(posttranscriptional gene silencing by RNA);GO:0035279(mRNA cleavage involved in gene silencing by m…	NA	K18422	EC:3.6.4.13
3	ENSDARG00000003151	skp1	1.55122	1.21324	0.354539	0.724	0.404	1.55245e-139	4.30216e-135	S-phase kinase-associated protein 1 [Source:ZFIN;Acc:ZDB-GENE-040426-1707]	GO:0006511(ubiquitin-dependent protein catabolic process);GO:0016301(kinase activity);GO:0016310(phosphorylation)	04110(Cell cycle);04114(Oocyte meiosis);04120(Ubiquitin mediated proteolysis);04141(Protein processing in endoplasmic reticulum);04310(Wnt signaling pathway);04350(TGF-beta signaling pathway)	K03094	NA
3	ENSDARG00000058328	lsm7	0.923778	0.707788	0.384229	0.531	0.23	5.00902e-139	1.3881e-134	LSM7 homolog, U6 small nuclear RNA and mRNA degradation associated [Source:ZFIN;Acc:ZDB-GENE-030131-8284]	GO:0000398(mRNA splicing, via spliceosome);GO:0000956(nuclear-transcribed mRNA catabolic process);GO:0005688(U6 snRNP);GO:0005689(U12-type spliceosomal complex);GO:0071004(U2-type prespliceosome);GO:0071013(catalytic step 2 spliceosome);GO:1990726(Lsm1-7-Pat1 complex)	03018(RNA degradation);03040(Spliceosome)	K12626	NA
3	ENSDARG00000055504	si:ch211-212k18.7	3.5878	2.59885	0.465226	0.905	0.616	1.54852e-138	4.29127e-134	si:ch211-212k18.7 [Source:ZFIN;Acc:ZDB-GENE-030131-1312]	GO:0005764(lysosome);GO:0005765(lysosomal membrane);GO:0016020(membrane);GO:0016021(integral component of membrane)	04142(Lysosome)	K06501	NA
3	ENSDARG00000002165	psme1	1.93685	1.366	0.503755	0.749	0.415	1.75066e-138	4.85144e-134	proteasome activator subunit 1 [Source:ZFIN;Acc:ZDB-GENE-991110-17]	GO:0000502(proteasome complex);GO:0005654(nucleoplasm);GO:0005737(cytoplasm);GO:0008537(proteasome activator complex);GO:0010950(positive regulation of endopeptidase activity);GO:0061133(endopeptidase activator activity);GO:0061136(regulation of proteasomal protein catabolic process);GO:2000045(regulation of G1/S transition of mitotic cell cycle)	03050(Proteasome)	K06696	NA
3	ENSDARG00000086618	psma3	1.37383	0.969785	0.502469	0.637	0.307	2.23552e-138	6.19506e-134	proteasome subunit alpha 3 [Source:ZFIN;Acc:ZDB-GENE-050913-120]	GO:0000502(proteasome complex);GO:0004175(endopeptidase activity);GO:0004298(threonine-type endopeptidase activity);GO:0005634(nucleus);GO:0005737(cytoplasm);GO:0005839(proteasome core complex);GO:0006508(proteolysis);GO:0006511(ubiquitin-dependent protein catabolic process);GO:0008233(peptidase activity);GO:0010498(proteasomal protein catabolic process);GO:0010499(proteasomal ubiquitin-independe…	03050(Proteasome)	K02727	EC:3.4.25.1
3	ENSDARG00000098722	si:ch73-170d6.3	0.757526	0.628013	0.270501	0.421	0.174	2.30259e-138	6.38094e-134	si:ch73-170d6.3 [Source:ZFIN;Acc:ZDB-GENE-161017-62]	GO:0016020(membrane);GO:0016021(integral component of membrane)	NA	NA	NA
3	ENSDARG00000043899	psma6l	0.636109	0.493344	0.366679	0.416	0.147	6.05747e-138	1.67865e-133	proteasome subunit alpha 6, like [Source:ZFIN;Acc:ZDB-GENE-010502-2]	GO:0000502(proteasome complex);GO:0004175(endopeptidase activity);GO:0004298(threonine-type endopeptidase activity);GO:0005634(nucleus);GO:0005737(cytoplasm);GO:0005839(proteasome core complex);GO:0006508(proteolysis);GO:0006511(ubiquitin-dependent protein catabolic process);GO:0008233(peptidase activity);GO:0010498(proteasomal protein catabolic process);GO:0010499(proteasomal ubiquitin-independe…	03050(Proteasome)	K02730	EC:3.4.25.1
3	ENSDARG00000020926	creb3l3l	2.55602	1.86064	0.458103	0.826	0.504	1.16553e-137	3.22991e-133	cAMP responsive element binding protein 3-like 3 like [Source:ZFIN;Acc:ZDB-GENE-040426-2942]	GO:0003700(DNA-binding transcription factor activity);GO:0006355(regulation of transcription, DNA-templated);GO:0030968(endoplasmic reticulum unfolded protein response);GO:0035497(cAMP response element binding);GO:0045944(positive regulation of transcription by RNA polymerase II)	04261(Adrenergic signaling in cardiomyocytes);04916(Melanogenesis)	K09048	NA
3	ENSDARG00000009208	prkcda	2.06253	1.49134	0.4678	0.776	0.446	1.26821e-137	3.51445e-133	protein kinase C, delta a [Source:ZFIN;Acc:ZDB-GENE-030131-6503]	GO:0000166(nucleotide binding);GO:0004672(protein kinase activity);GO:0004674(protein serine/threonine kinase activity);GO:0004697(protein kinase C activity);GO:0005524(ATP binding);GO:0005634(nucleus);GO:0005737(cytoplasm);GO:0006468(protein phosphorylation);GO:0006915(apoptotic process);GO:0007049(cell cycle);GO:0016301(kinase activity);GO:0016310(phosphorylation);GO:0016740(transferase activit…	04140(Autophagy - animal);04270(Vascular smooth muscle contraction);04621(NOD-like receptor signaling pathway);04625(C-type lectin receptor signaling pathway);04912(GnRH signaling pathway);04933(AGE-RAGE signaling pathway in diabetic complications)	K06068	EC:2.7.11.13
3	ENSDARG00000022968	fxr1	0.381381	0.305163	0.321654	0.275	0.061	3.65385e-137	1.01255e-132	fragile X mental retardation, autosomal homolog 1 [Source:ZFIN;Acc:ZDB-GENE-030131-5431]	GO:0001756(somitogenesis);GO:0003676(nucleic acid binding);GO:0003723(RNA binding);GO:0003729(mRNA binding);GO:0003730(mRNA 3'-UTR binding);GO:0005634(nucleus);GO:0005737(cytoplasm);GO:0005844(polysome);GO:0006417(regulation of translation);GO:0007507(heart development);GO:0007519(skeletal muscle tissue development);GO:0014069(postsynaptic density);GO:0017148(negative regulation of translation);G…	03013(RNA transport)	K15516	NA
3	ENSDARG00000092798	ppib	3.49179	2.38891	0.547613	0.877	0.602	6.5053e-136	1.80275e-131	peptidylprolyl isomerase B (cyclophilin B) [Source:ZFIN;Acc:ZDB-GENE-040426-1955]	GO:0000413(protein peptidyl-prolyl isomerization);GO:0003755(peptidyl-prolyl cis-trans isomerase activity);GO:0005518(collagen binding);GO:0005575(cellular_component);GO:0006457(protein folding);GO:0016018(cyclosporin A binding);GO:0016853(isomerase activity);GO:0042026(protein refolding);GO:0051082(unfolded protein binding)	NA	K03768	EC:5.2.1.8
3	ENSDARG00000010423	npsn	106.745	80.2263	0.412019	0.995	0.987	7.39174e-136	2.0484e-131	nephrosin [Source:ZFIN;Acc:ZDB-GENE-040420-2]	GO:0004222(metalloendopeptidase activity);GO:0005575(cellular_component);GO:0006508(proteolysis);GO:0008233(peptidase activity);GO:0008237(metallopeptidase activity);GO:0008270(zinc ion binding);GO:0016787(hydrolase activity);GO:0046872(metal ion binding)	NA	NA	NA
3	ENSDARG00000039346	ndufa5	0.848484	0.692799	0.29245	0.528	0.248	2.00137e-135	5.54618e-131	NADH:ubiquinone oxidoreductase subunit A5 [Source:ZFIN;Acc:ZDB-GENE-050320-17]	GO:0005747(mitochondrial respiratory chain complex I);GO:0022904(respiratory electron transport chain)	00190(Oxidative phosphorylation)	K03949	NA
3	ENSDARG00000031427	calm2a	1.04183	0.835014	0.319248	0.56	0.27	5.55746e-135	1.54008e-130	calmodulin 2a (phosphorylase kinase, delta) [Source:ZFIN;Acc:ZDB-GENE-030804-3]	GO:0005509(calcium ion binding);GO:0019722(calcium-mediated signaling);GO:0046872(metal ion binding)	04020(Calcium signaling pathway);04070(Phosphatidylinositol signaling system);04114(Oocyte meiosis);04218(Cellular senescence);04261(Adrenergic signaling in cardiomyocytes);04270(Vascular smooth muscle contraction);04371(Apelin signaling pathway);04625(C-type lectin receptor signaling pathway);04744(Phototransduction);04910(Insulin signaling pathway);04912(GnRH signaling pathway);04916(Melanogene…	K02183	NA
3	ENSDARG00000104018	mtpn	4.10382	2.81803	0.542278	0.911	0.66	8.05653e-135	2.23263e-130	myotrophin [Source:ZFIN;Acc:ZDB-GENE-040426-2166]	GO:0005515(protein binding);GO:0005634(nucleus);GO:0005737(cytoplasm);GO:0048471(perinuclear region of cytoplasm)	NA	NA	NA
3	ENSDARG00000076836	gpx4b	2.15705	1.52839	0.497049	0.784	0.458	1.80591e-134	5.00454e-130	glutathione peroxidase 4b [Source:ZFIN;Acc:ZDB-GENE-030410-3]	GO:0004601(peroxidase activity);GO:0004602(glutathione peroxidase activity);GO:0005634(nucleus);GO:0005739(mitochondrion);GO:0006979(response to oxidative stress);GO:0016491(oxidoreductase activity);GO:0030178(negative regulation of Wnt signaling pathway);GO:0047066(phospholipid-hydroperoxide glutathione peroxidase activity);GO:0055114(oxidation-reduction process);GO:0098869(cellular oxidant deto…	00480(Glutathione metabolism);04216(Ferroptosis)	K05361	EC:1.11.1.12
3	ENSDARG00000035699	srp19	0.60684	0.467695	0.375748	0.399	0.136	1.93993e-134	5.37593e-130	signal recognition particle 19 [Source:ZFIN;Acc:ZDB-GENE-040426-2657]	GO:0005786(signal recognition particle, endoplasmic reticulum targeting);GO:0006614(SRP-dependent cotranslational protein targeting to membrane);GO:0006616(SRP-dependent cotranslational protein targeting to membrane, translocation);GO:0006617(SRP-dependent cotranslational protein targeting to membrane, signal sequence recognition);GO:0008312(7S RNA binding);GO:0048500(signal recognition particle)	03060(Protein export)	K03105	NA
3	ENSDARG00000045277	rdh12l	1.43621	1.115	0.365231	0.677	0.362	5.64552e-134	1.56449e-129	retinol dehydrogenase 12, like [Source:ZFIN;Acc:ZDB-GENE-040801-48]	GO:0005575(cellular_component)	NA	NA	NA
3	ENSDARG00000039005	trappc1	0.506961	0.417097	0.281492	0.374	0.135	5.67366e-134	1.57228e-129	trafficking protein particle complex 1 [Source:ZFIN;Acc:ZDB-GENE-040718-242]	GO:0005737(cytoplasm);GO:0006888(endoplasmic reticulum to Golgi vesicle-mediated transport);GO:0016192(vesicle-mediated transport);GO:0017112(Rab guanyl-nucleotide exchange factor activity);GO:0030008(TRAPP complex)	NA	K20300	NA
3	ENSDARG00000015978	COX5B	4.94072	3.4835	0.504186	0.95	0.734	7.59713e-134	2.10532e-129	zgc:86599 [Source:ZFIN;Acc:ZDB-GENE-040625-180]	GO:0004129(cytochrome-c oxidase activity);GO:0005740(mitochondrial envelope);GO:0006123(mitochondrial electron transport, cytochrome c to oxygen);GO:0042776(mitochondrial ATP synthesis coupled proton transport)	00190(Oxidative phosphorylation);04260(Cardiac muscle contraction)	K02265	NA
3	ENSDARG00000079175	si:ch211-79k12.1	0.619198	0.472713	0.389438	0.345	0.103	1.21116e-133	3.35636e-129	si:ch211-79k12.1 [Source:ZFIN;Acc:ZDB-GENE-080303-9]	GO:0016020(membrane);GO:0016021(integral component of membrane)	NA	NA	NA
3	ENSDARG00000067711	parvg	1.98684	1.50709	0.398707	0.789	0.47	1.32913e-133	3.68329e-129	parvin, gamma [Source:ZFIN;Acc:ZDB-GENE-070410-67]	GO:0003779(actin binding);GO:0005515(protein binding);GO:0005575(cellular_component);GO:0005737(cytoplasm);GO:0005925(focal adhesion);GO:0007155(cell adhesion);GO:0007163(establishment or maintenance of cell polarity);GO:0015629(actin cytoskeleton);GO:0030031(cell projection assembly);GO:0031532(actin cytoskeleton reorganization);GO:0034446(substrate adhesion-dependent cell spreading)	04510(Focal adhesion)	K06275	NA
3	ENSDARG00000022254	prkcbb	0.704149	0.547035	0.364246	0.416	0.151	2.54281e-133	7.04664e-129	protein kinase C, beta b [Source:ZFIN;Acc:ZDB-GENE-040426-1178]	GO:0000166(nucleotide binding);GO:0002250(adaptive immune response);GO:0002376(immune system process);GO:0003682(chromatin binding);GO:0004672(protein kinase activity);GO:0004674(protein serine/threonine kinase activity);GO:0004697(protein kinase C activity);GO:0005524(ATP binding);GO:0005634(nucleus);GO:0005737(cytoplasm);GO:0006325(chromatin organization);GO:0006357(regulation of transcription …	04010(MAPK signaling pathway);04012(ErbB signaling pathway);04020(Calcium signaling pathway);04070(Phosphatidylinositol signaling system);04150(mTOR signaling pathway);04270(Vascular smooth muscle contraction);04310(Wnt signaling pathway);04370(VEGF signaling pathway);04510(Focal adhesion);04540(Gap junction);04912(GnRH signaling pathway);04916(Melanogenesis);04933(AGE-RAGE signaling pathway in d…	K19662	EC:2.7.11.13
3	ENSDARG00000042876	abracl	4.77364	3.3999	0.489598	0.945	0.702	2.62716e-133	7.28038e-129	ABRA C-terminal like [Source:ZFIN;Acc:ZDB-GENE-030131-8594]	GO:0032970(regulation of actin filament-based process)	NA	NA	NA
3	ENSDARG00000014165	ssr3	4.48435	3.32618	0.431031	0.847	0.539	4.21504e-133	1.16807e-128	signal sequence receptor, gamma [Source:ZFIN;Acc:ZDB-GENE-030131-9134]	GO:0005623(cell);GO:0006614(SRP-dependent cotranslational protein targeting to membrane);GO:0016020(membrane);GO:0016021(integral component of membrane)	04141(Protein processing in endoplasmic reticulum)	K13251	NA
3	ENSDARG00000035679	si:rp71-45k5.4	1.06268	0.836297	0.345626	0.594	0.293	1.35371e-132	3.7514e-128	si:rp71-45k5.4 [Source:ZFIN;Acc:ZDB-GENE-060503-941]	GO:0000502(proteasome complex);GO:0004175(endopeptidase activity);GO:0004298(threonine-type endopeptidase activity);GO:0005634(nucleus);GO:0005737(cytoplasm);GO:0005839(proteasome core complex);GO:0006508(proteolysis);GO:0006511(ubiquitin-dependent protein catabolic process);GO:0008233(peptidase activity);GO:0010498(proteasomal protein catabolic process);GO:0010499(proteasomal ubiquitin-independe…	03050(Proteasome)	K02726	EC:3.4.25.1
3	ENSDARG00000015385	ndufs3	0.704405	0.552691	0.349933	0.469	0.192	2.14716e-132	5.9502e-128	NADH:ubiquinone oxidoreductase core subunit S3 [Source:ZFIN;Acc:ZDB-GENE-050417-274]	GO:0005747(mitochondrial respiratory chain complex I);GO:0008137(NADH dehydrogenase (ubiquinone) activity);GO:0016651(oxidoreductase activity, acting on NAD(P)H);GO:0055114(oxidation-reduction process)	00190(Oxidative phosphorylation)	K03936	1.6.99.3;EC:7.1.1.2
3	ENSDARG00000090194	lamtor5	0.698502	0.555334	0.330908	0.458	0.185	3.88604e-132	1.0769e-127	late endosomal/lysosomal adaptor, MAPK and MTOR activator 5 [Source:ZFIN;Acc:ZDB-GENE-110411-193]	GO:0005737(cytoplasm);GO:0019079(viral genome replication);GO:0043066(negative regulation of apoptotic process);GO:0043154(negative regulation of cysteine-type endopeptidase activity involved in apoptotic process);GO:0071986(Ragulator complex)	04150(mTOR signaling pathway)	K16344	NA
3	ENSDARG00000033009	h3f3b.1	1.78068	1.37684	0.371069	0.756	0.438	4.35356e-132	1.20646e-127	H3 histone, family 3B.1 [Source:ZFIN;Acc:ZDB-GENE-050417-65]	GO:0000786(nucleosome);GO:0003677(DNA binding);GO:0005634(nucleus);GO:0005694(chromosome);GO:0031492(nucleosomal DNA binding);GO:0046982(protein heterodimerization activity)	NA	K11253	NA
3	ENSDARG00000016607	echdc2	1.45139	1.06247	0.450006	0.658	0.337	2.46057e-131	6.81873e-127	enoyl CoA hydratase domain containing 2 [Source:ZFIN;Acc:ZDB-GENE-030219-147]	GO:0003824(catalytic activity);GO:0004300(enoyl-CoA hydratase activity);GO:0005739(mitochondrion);GO:0006635(fatty acid beta-oxidation)	NA	NA	NA
3	ENSDARG00000070822	cnp	4.5488	3.256	0.482384	0.947	0.714	2.57723e-131	7.14202e-127	2',3'-cyclic nucleotide 3' phosphodiesterase [Source:ZFIN;Acc:ZDB-GENE-030521-29]	GO:0004113(2',3'-cyclic-nucleotide 3'-phosphodiesterase activity);GO:0005737(cytoplasm);GO:0005829(cytosol);GO:0009214(cyclic nucleotide catabolic process);GO:0016020(membrane);GO:0031103(axon regeneration)	NA	K01121	EC:3.1.4.37
3	ENSDARG00000023852	lsm4	1.10219	0.849904	0.375001	0.596	0.291	3.21677e-131	8.91432e-127	LSM4 homolog, U6 small nuclear RNA and mRNA degradation associated [Source:ZFIN;Acc:ZDB-GENE-040426-1652]	GO:0000387(spliceosomal snRNP assembly);GO:0000398(mRNA splicing, via spliceosome);GO:0000932(P-body);GO:0000956(nuclear-transcribed mRNA catabolic process);GO:0003723(RNA binding);GO:0005634(nucleus);GO:0005681(spliceosomal complex);GO:0005688(U6 snRNP);GO:0006396(RNA processing);GO:0006397(mRNA processing);GO:0008380(RNA splicing);GO:0017070(U6 snRNA binding);GO:0033962(cytoplasmic mRNA process…	03018(RNA degradation);03040(Spliceosome)	K12623	NA
3	ENSDARG00000063292	ssuh2rs1	0.827964	0.66758	0.310627	0.507	0.23	7.07334e-131	1.96016e-126	ssu-2 homolog, related sequence 1 [Source:ZFIN;Acc:ZDB-GENE-060929-994]	GO:0005634(nucleus);GO:0005737(cytoplasm);GO:0042476(odontogenesis)	NA	NA	NA
3	ENSDARG00000038728	ch25hl2	2.79332	1.80704	0.628354	0.749	0.434	8.74916e-130	2.42457e-125	cholesterol 25-hydroxylase like 2 [Source:ZFIN;Acc:ZDB-GENE-080204-82]	GO:0000254(C-4 methylsterol oxidase activity);GO:0004497(monooxygenase activity);GO:0005506(iron ion binding);GO:0005783(endoplasmic reticulum);GO:0005789(endoplasmic reticulum membrane);GO:0006629(lipid metabolic process);GO:0006694(steroid biosynthetic process);GO:0008202(steroid metabolic process);GO:0008203(cholesterol metabolic process);GO:0008395(steroid hydroxylase activity);GO:0008610(lip…	00120(Primary bile acid biosynthesis)	K10223	EC:1.14.99.38
3	ENSDARG00000032651	ppp1r10	0.839368	0.646666	0.376281	0.463	0.187	3.36052e-129	9.31268e-125	protein phosphatase 1, regulatory subunit 10 [Source:ZFIN;Acc:ZDB-GENE-020419-15]	GO:0005634(nucleus);GO:0046872(metal ion binding)	NA	K17552	NA
3	ENSDARG00000037852	zgc:101663	1.04455	0.838777	0.316529	0.527	0.249	7.02565e-129	1.94695e-124	zgc:101663 [Source:ZFIN;Acc:ZDB-GENE-041114-149]	GO:0000139(Golgi membrane);GO:0005794(Golgi apparatus);GO:0006486(protein glycosylation);GO:0008454(alpha-1,3-mannosylglycoprotein 4-beta-N-acetylglucosaminyltransferase activity);GO:0016020(membrane);GO:0016021(integral component of membrane);GO:0016740(transferase activity);GO:0016757(transferase activity, transferring glycosyl groups);GO:0046872(metal ion binding)	00510(N-Glycan biosynthesis)	K13748	2.4.1.145;EC:2.4.1.201
3	ENSDARG00000102435	plekhf1	6.7673	4.70864	0.52327	0.842	0.536	9.98079e-129	2.76588e-124	pleckstrin homology domain containing, family F (with FYVE domain) member 1 [Source:ZFIN;Acc:ZDB-GENE-040426-1289]	GO:0035091(phosphatidylinositol binding);GO:0046872(metal ion binding)	NA	NA	NA
3	ENSDARG00000016754	tbca	0.759736	0.619106	0.295312	0.483	0.219	1.00113e-128	2.77433e-124	tubulin cofactor a [Source:ZFIN;Acc:ZDB-GENE-040426-962]	GO:0005737(cytoplasm);GO:0005856(cytoskeleton);GO:0005874(microtubule);GO:0007021(tubulin complex assembly);GO:0007023(post-chaperonin tubulin folding pathway);GO:0048487(beta-tubulin binding)	NA	K17292	NA
3	ENSDARG00000062532	washc2c	0.683695	0.55164	0.309624	0.421	0.169	2.95007e-128	8.17525e-124	WASH complex subunit 2C [Source:ZFIN;Acc:ZDB-GENE-060825-87]	GO:0003674(molecular_function);GO:0008150(biological_process);GO:0071203(WASH complex)	04144(Endocytosis)	K18462	NA
3	ENSDARG00000045543	atp6v1f	0.685204	0.542812	0.336081	0.44	0.176	3.16137e-128	8.76079e-124	ATPase H+ transporting V1 subunit F [Source:ZFIN;Acc:ZDB-GENE-040718-259]	GO:0005886(plasma membrane);GO:0006811(ion transport);GO:0015991(ATP hydrolysis coupled proton transport);GO:0016020(membrane);GO:0033180(proton-transporting V-type ATPase, V1 domain);GO:0034220(ion transmembrane transport);GO:0042127(regulation of cell population proliferation);GO:0042625(ATPase coupled ion transmembrane transporter activity);GO:0046961(proton-transporting ATPase activity, rotat…	00190(Oxidative phosphorylation);04145(Phagosome);04150(mTOR signaling pathway)	K02151	NA
3	ENSDARG00000110173	BX323861.3	0.569162	0.410378	0.471887	0.261	0.053	3.70541e-128	1.02684e-123	NA	GO:0005525(GTP binding)	NA	NA	NA
3	ENSDARG00000012945	tnfsf13b	0.285149	0.234941	0.279415	0.176	0.023	1.09911e-127	3.04584e-123	TNF superfamily member 13b [Source:ZFIN;Acc:ZDB-GENE-080204-44]	GO:0005164(tumor necrosis factor receptor binding);GO:0005515(protein binding);GO:0006955(immune response);GO:0016020(membrane);GO:0016021(integral component of membrane)	04060(Cytokine-cytokine receptor interaction);04672(Intestinal immune network for IgA production)	K05476	NA
3	ENSDARG00000032296	pomp	1.89451	1.3487	0.490255	0.743	0.423	2.64884e-127	7.34047e-123	proteasome maturation protein [Source:ZFIN;Acc:ZDB-GENE-040801-10]	GO:0003674(molecular_function);GO:0005634(nucleus);GO:0005737(cytoplasm);GO:0043248(proteasome assembly)	03050(Proteasome)	K11599	NA
3	ENSDARG00000089043	ptpn6	2.43754	1.82317	0.418977	0.808	0.497	3.51488e-127	9.74044e-123	protein tyrosine phosphatase, non-receptor type 6 [Source:ZFIN;Acc:ZDB-GENE-030131-7513]	GO:0004721(phosphoprotein phosphatase activity);GO:0004725(protein tyrosine phosphatase activity);GO:0005737(cytoplasm);GO:0006470(protein dephosphorylation);GO:0016311(dephosphorylation);GO:0016787(hydrolase activity);GO:0016791(phosphatase activity);GO:0035335(peptidyl-tyrosine dephosphorylation);GO:0045087(innate immune response)	04520(Adherens junction)	K05697	EC:3.1.3.48
3	ENSDARG00000038668	gbp1	0.883852	0.705621	0.324911	0.423	0.171	6.56542e-127	1.81941e-122	guanylate binding protein 1 [Source:ZFIN;Acc:ZDB-GENE-040718-32]	GO:0000166(nucleotide binding);GO:0003924(GTPase activity);GO:0005525(GTP binding)	04621(NOD-like receptor signaling pathway)	K20899	NA
3	ENSDARG00000103276	fcer1g	0.904592	0.720083	0.329104	0.429	0.181	1.27846e-126	3.54286e-122	Fc fragment of IgE, high affinity I, receptor for; gamma polypeptide [Source:ZFIN;Acc:ZDB-GENE-061130-3]	GO:0016020(membrane);GO:0016021(integral component of membrane)	04625(C-type lectin receptor signaling pathway)	K07983	NA
3	ENSDARG00000013561	pgm1	1.12743	0.850624	0.406449	0.57	0.268	2.08192e-126	5.76942e-122	phosphoglucomutase 1 [Source:ZFIN;Acc:ZDB-GENE-040426-1245]	GO:0000287(magnesium ion binding);GO:0004614(phosphoglucomutase activity);GO:0005829(cytosol);GO:0005975(carbohydrate metabolic process);GO:0005978(glycogen biosynthetic process);GO:0006006(glucose metabolic process);GO:0016868(intramolecular transferase activity, phosphotransferases);GO:0019388(galactose catabolic process);GO:0046872(metal ion binding);GO:0071704(organic substance metabolic proc…	00010(Glycolysis / Gluconeogenesis);00030(Pentose phosphate pathway);00052(Galactose metabolism);00230(Purine metabolism);00500(Starch and sucrose metabolism);00520(Amino sugar and nucleotide sugar metabolism)	K01835	EC:5.4.2.2
3	ENSDARG00000074846	si:dkeyp-68b7.12	2.8408	2.13487	0.412147	0.838	0.534	2.24888e-126	6.2321e-122	si:dkeyp-68b7.12 [Source:ZFIN;Acc:ZDB-GENE-141212-333]	GO:0005096(GTPase activator activity);GO:0007165(signal transduction);GO:0007264(small GTPase mediated signal transduction);GO:0043547(positive regulation of GTPase activity)	NA	K20645	NA
3	ENSDARG00000031511	psmb2	1.34183	1.00691	0.414272	0.661	0.347	4.38311e-126	1.21465e-121	proteasome subunit beta 2 [Source:ZFIN;Acc:ZDB-GENE-040718-353]	GO:0000502(proteasome complex);GO:0004175(endopeptidase activity);GO:0004298(threonine-type endopeptidase activity);GO:0005634(nucleus);GO:0005737(cytoplasm);GO:0005839(proteasome core complex);GO:0006508(proteolysis);GO:0008233(peptidase activity);GO:0010498(proteasomal protein catabolic process);GO:0010499(proteasomal ubiquitin-independent protein catabolic process);GO:0016787(hydrolase activit…	03050(Proteasome)	K02734	EC:3.4.25.1
3	ENSDARG00000037259	ndufb6	0.702125	0.557681	0.332288	0.462	0.193	5.69909e-126	1.57933e-121	NADH:ubiquinone oxidoreductase subunit B [Source:ZFIN;Acc:ZDB-GENE-040426-1781]	GO:0003674(molecular_function);GO:0005747(mitochondrial respiratory chain complex I);GO:0006120(mitochondrial electron transport, NADH to ubiquinone);GO:0016020(membrane);GO:0016021(integral component of membrane)	00190(Oxidative phosphorylation)	K03962	NA
3	ENSDARG00000040884	mxi1	0.662211	0.543245	0.285688	0.347	0.124	2.17149e-125	6.01764e-121	max interactor 1, dimerization protein [Source:ZFIN;Acc:ZDB-GENE-990415-151]	GO:0046983(protein dimerization activity)	NA	K09114	NA
3	ENSDARG00000076296	triqk	0.723707	0.569571	0.345529	0.46	0.191	3.22046e-125	8.92453e-121	triple QxxK/R motif containing [Source:NCBI gene;Acc:100147776]	GO:0005783(endoplasmic reticulum);GO:0005789(endoplasmic reticulum membrane);GO:0016020(membrane);GO:0016021(integral component of membrane)	NA	NA	NA
3	ENSDARG00000000069	dap	1.6857	1.29231	0.383403	0.734	0.422	3.23228e-125	8.9573e-121	death-associated protein [Source:ZFIN;Acc:ZDB-GENE-000511-3]	GO:0010507(negative regulation of autophagy);GO:0034198(cellular response to amino acid starvation);GO:0070513(death domain binding);GO:0097190(apoptotic signaling pathway)	NA	NA	NA
3	ENSDARG00000076290	calr	0.505206	0.365773	0.465924	0.25	0.05	5.44897e-125	1.51002e-120	calreticulin [Source:ZFIN;Acc:ZDB-GENE-030131-4042]	GO:0005509(calcium ion binding);GO:0005515(protein binding);GO:0005783(endoplasmic reticulum);GO:0006457(protein folding);GO:0046872(metal ion binding);GO:0051082(unfolded protein binding)	04141(Protein processing in endoplasmic reticulum);04145(Phagosome);05168(Herpes simplex virus 1 infection)	K08057	NA
3	ENSDARG00000010965	psma8	1.62474	1.24743	0.381246	0.731	0.419	1.80338e-124	4.99752e-120	proteasome subunit alpha 8 [Source:ZFIN;Acc:ZDB-GENE-040426-2194]	GO:0000502(proteasome complex);GO:0004175(endopeptidase activity);GO:0004298(threonine-type endopeptidase activity);GO:0005634(nucleus);GO:0005737(cytoplasm);GO:0005839(proteasome core complex);GO:0006508(proteolysis);GO:0006511(ubiquitin-dependent protein catabolic process);GO:0008233(peptidase activity);GO:0010498(proteasomal protein catabolic process);GO:0010499(proteasomal ubiquitin-independe…	03050(Proteasome)	K02731	EC:3.4.25.1
3	ENSDARG00000056642	hdac9b	1.36691	1.11127	0.298701	0.601	0.314	1.91027e-124	5.29374e-120	histone deacetylase 9b [Source:ZFIN;Acc:ZDB-GENE-040109-7]	NA	NA	K11409	EC:3.5.1.98
3	ENSDARG00000112087	ube2l3a	1.39465	1.14311	0.286945	0.676	0.385	6.18877e-124	1.71503e-119	ubiquitin-conjugating enzyme E2L 3a [Source:ZFIN;Acc:ZDB-GENE-030131-2977]	GO:0000151(ubiquitin ligase complex);GO:0000166(nucleotide binding);GO:0005524(ATP binding);GO:0005575(cellular_component);GO:0006511(ubiquitin-dependent protein catabolic process);GO:0016567(protein ubiquitination);GO:0016740(transferase activity);GO:0031625(ubiquitin protein ligase binding);GO:0061631(ubiquitin conjugating enzyme activity)	04120(Ubiquitin mediated proteolysis)	K04552	EC:2.3.2.23
3	ENSDARG00000077850	lgals3a	1.18879	0.922605	0.365707	0.632	0.328	6.49526e-124	1.79997e-119	lectin, galactoside binding soluble 3a [Source:ZFIN;Acc:ZDB-GENE-030131-7667]	GO:0030246(carbohydrate binding)	NA	K06831	NA
3	ENSDARG00000112454	FO744833.2	1.05499	0.871614	0.275472	0.506	0.243	6.50352e-124	1.80226e-119	poly [ADP-ribose] polymerase 14 [Source:NCBI gene;Acc:562648]	GO:0003676(nucleic acid binding);GO:0003950(NAD+ ADP-ribosyltransferase activity);GO:0016740(transferase activity);GO:0016757(transferase activity, transferring glycosyl groups)	NA	K15261	EC:2.4.2.30
3	ENSDARG00000007534	itln1	0.903665	0.600864	0.58875	0.318	0.086	1.13511e-123	3.14562e-119	intelectin 1 [Source:ZFIN;Acc:ZDB-GENE-060929-564]	GO:0005575(cellular_component);GO:0030246(carbohydrate binding)	NA	NA	NA
3	ENSDARG00000037433	fmr1	0.565342	0.449237	0.331646	0.347	0.115	3.36909e-123	9.33643e-119	fragile X mental retardation 1 [Source:ZFIN;Acc:ZDB-GENE-020731-6]	GO:0000381(regulation of alternative mRNA splicing, via spliceosome);GO:0001934(positive regulation of protein phosphorylation);GO:0003676(nucleic acid binding);GO:0003723(RNA binding);GO:0003729(mRNA binding);GO:0003730(mRNA 3'-UTR binding);GO:0005634(nucleus);GO:0005737(cytoplasm);GO:0005844(polysome);GO:0006417(regulation of translation);GO:0007417(central nervous system development);GO:000742…	03013(RNA transport)	K15516	NA
3	ENSDARG00000054937	badb	0.713184	0.578903	0.300951	0.436	0.183	7.43604e-123	2.06067e-118	BCL2 associated agonist of cell death b [Source:ZFIN;Acc:ZDB-GENE-000616-1]	GO:0005737(cytoplasm);GO:0005739(mitochondrion);GO:0006915(apoptotic process);GO:0043065(positive regulation of apoptotic process);GO:0071479(cellular response to ionizing radiation)	04012(ErbB signaling pathway);04140(Autophagy - animal);04210(Apoptosis);04370(VEGF signaling pathway);04510(Focal adhesion);04910(Insulin signaling pathway);05168(Herpes simplex virus 1 infection)	K02158	NA
3	ENSDARG00000075768	sdhb	1.49662	1.16375	0.362926	0.7	0.394	7.44154e-123	2.0622e-118	succinate dehydrogenase complex, subunit B, iron sulfur (Ip) [Source:ZFIN;Acc:ZDB-GENE-030131-8005]	GO:0005739(mitochondrion);GO:0005743(mitochondrial inner membrane);GO:0005749(mitochondrial respiratory chain complex II, succinate dehydrogenase complex (ubiquinone));GO:0006099(tricarboxylic acid cycle);GO:0008177(succinate dehydrogenase (ubiquinone) activity);GO:0009055(electron transfer activity);GO:0009060(aerobic respiration);GO:0016020(membrane);GO:0016491(oxidoreductase activity);GO:00229…	00020(Citrate cycle (TCA cycle));00190(Oxidative phosphorylation)	K00235	EC:1.3.5.1
3	ENSDARG00000040445	si:ch211-219a4.3	1.00766	0.785501	0.359326	0.493	0.218	8.81961e-123	2.44409e-118	si:ch211-219a4.3 [Source:ZFIN;Acc:ZDB-GENE-070424-157]	GO:0003676(nucleic acid binding);GO:0003723(RNA binding);GO:0003950(NAD+ ADP-ribosyltransferase activity);GO:0016740(transferase activity);GO:0016757(transferase activity, transferring glycosyl groups)	NA	K15261	EC:2.4.2.30
3	ENSDARG00000092584	si:ch1073-385f13.3	0.236436	0.196979	0.263409	0.176	0.021	9.77737e-123	2.70951e-118	si:ch1073-385f13.3 [Source:ZFIN;Acc:ZDB-GENE-131127-357]	GO:0003676(nucleic acid binding);GO:0006259(DNA metabolic process);GO:0008296(3'-5'-exodeoxyribonuclease activity);GO:0090305(nucleic acid phosphodiester bond hydrolysis)	NA	NA	NA
3	ENSDARG00000039142	arpc5a	3.24504	2.30652	0.492516	0.865	0.58	1.28575e-122	3.56308e-118	actin related protein 2/3 complex, subunit 5A [Source:ZFIN;Acc:ZDB-GENE-030131-8448]	GO:0005737(cytoplasm);GO:0005856(cytoskeleton);GO:0005885(Arp2/3 protein complex);GO:0015629(actin cytoskeleton);GO:0016477(cell migration);GO:0030833(regulation of actin filament polymerization);GO:0034314(Arp2/3 complex-mediated actin nucleation);GO:0051015(actin filament binding)	04144(Endocytosis);04810(Regulation of actin cytoskeleton);05132(Salmonella infection)	K05754	NA
3	ENSDARG00000057772	march7.2	0.8051	0.658525	0.28993	0.474	0.216	6.65594e-122	1.84449e-117	membrane-associated ring finger (C3HC4) 7 [Source:ZFIN;Acc:ZDB-GENE-080204-121]	GO:0008150(biological_process);GO:0008270(zinc ion binding);GO:0046872(metal ion binding)	NA	K10662	EC:2.3.2.27
3	ENSDARG00000091111	si:ch211-15b10.6	0.662694	0.5304	0.321263	0.389	0.146	1.04248e-121	2.88891e-117	si:ch211-15b10.6 [Source:ZFIN;Acc:ZDB-GENE-160728-113]	GO:0005515(protein binding);GO:0007249(I-kappaB kinase/NF-kappaB signaling)	NA	NA	NA
3	ENSDARG00000003526	psma5	1.19491	0.869232	0.459089	0.598	0.29	1.09889e-121	3.04523e-117	proteasome subunit alpha 5 [Source:ZFIN;Acc:ZDB-GENE-040625-96]	GO:0000502(proteasome complex);GO:0004175(endopeptidase activity);GO:0004298(threonine-type endopeptidase activity);GO:0005634(nucleus);GO:0005737(cytoplasm);GO:0005839(proteasome core complex);GO:0006508(proteolysis);GO:0006511(ubiquitin-dependent protein catabolic process);GO:0008233(peptidase activity);GO:0010498(proteasomal protein catabolic process);GO:0010499(proteasomal ubiquitin-independe…	03050(Proteasome)	K02729	EC:3.4.25.1
3	ENSDARG00000091003	il34	1.94865	1.37301	0.505133	0.661	0.349	3.45304e-121	9.56906e-117	interleukin 34 [Source:ZFIN;Acc:ZDB-GENE-050419-150]	GO:0001934(positive regulation of protein phosphorylation);GO:0005157(macrophage colony-stimulating factor receptor binding);GO:0005615(extracellular space);GO:0008284(positive regulation of cell population proliferation)	04060(Cytokine-cytokine receptor interaction)	K22633	NA
3	ENSDARG00000006370	atp6v1h	0.936837	0.724352	0.371106	0.541	0.253	4.59361e-121	1.27298e-116	ATPase H+ transporting V1 subunit H [Source:ZFIN;Acc:ZDB-GENE-021219-2]	GO:0000221(vacuolar proton-transporting V-type ATPase, V1 domain);GO:0006811(ion transport);GO:0015991(ATP hydrolysis coupled proton transport);GO:0030282(bone mineralization);GO:0043473(pigmentation);GO:0046961(proton-transporting ATPase activity, rotational mechanism);GO:0048069(eye pigmentation);GO:0060041(retina development in camera-type eye);GO:0060348(bone development);GO:0061075(positive …	00190(Oxidative phosphorylation);04142(Lysosome);04145(Phagosome);04150(mTOR signaling pathway)	K02144	NA
3	ENSDARG00000052840	ndufs4	0.641855	0.515168	0.317204	0.438	0.183	1.45952e-120	4.04462e-116	NADH:ubiquinone oxidoreductase subunit S4 [Source:ZFIN;Acc:ZDB-GENE-050522-421]	GO:0005747(mitochondrial respiratory chain complex I);GO:0008137(NADH dehydrogenase (ubiquinone) activity);GO:0016651(oxidoreductase activity, acting on NAD(P)H);GO:0022900(electron transport chain)	00190(Oxidative phosphorylation)	K03937	NA
[truncated: 1,166 more rows]

## Sheet: Average expression profile
Average expression profile of neutrophils subset categories
GeneName	1_PBS	0_PBS	2_PBS	4_PBS	3_PBS	5_PBS	0_SVCV	3_SVCV	4_SVCV	2_SVCV	1_SVCV	5_SVCV	2_Vaccinated+SVCV	0_Vaccinated+SVCV	1_Vaccinated+SVCV	4_Vaccinated+SVCV	3_Vaccinated+SVCV	5_Vaccinated+SVCV
ptpn12	0.0016603677361351	0	0.00127085989430512	0	0	0	0.00262364979589944	0.00689890368785094	0	0.00331933078643426	0	0	0.00255451104431167	0.00472449163347094	0	0	0.0123493960550562	0.00296747704508132
[truncated: 21,842 more rows]

## Sheet: Number and percentage of cells 
Number and percentage of cells in each subset of neutrophils
Clusters	0	1	2	3	4	5	Total
[truncated: 3 more rows]
