# Supplementary material for: Single-cell RNA sequencing unveils the hidden powers of zebrafish kidney for generating both hematopoiesis and adaptive antiviral immunity
Source: eLife. 2024 Mar 18;13:RP92424. doi: 10.7554/eLife.92424 (PMC10948150; doi:10.7554/eLife.92424)
Supplement: Supplementary file 8. [file elife-92424-supp8.xlsx]

## Sheet: Sheet1
Supplementary file 8. Similarities and differences in HSPC and immune cell populations between zebrafish and human.
Cell types and related features	Zebrafish	Human
Adult hematopoietic organ	Kidney	Bone marrow
Major immune cell types	T cell, B cell, NK cell, Neutrophil, Macrophage, DC, Eosinophil	T cell, B cell, NK cell, Neutrophil, Macrophage, DC, Eosinophil, Basophil, Mast cell
T cell subsets	Th1, Th2, Th17, Treg, CD8 CTL, γδ T, NKT	Th1, Th2, Th17, Th9, Tfh, Th22, Treg, CD8 CTL, γδ T, NKT
B cell subsets	immature/mature B cells (im/mat. B), Common IgM+IgD+ B, Pro/pre B, Plasma cells, Germinal center B-like, activated B cells and plasmablasts (act. B/PBs), B1-like	Plasmablast, Plasma cell, Lymphoplasmacytoid cell, Memory B cell, B-2 cell, B-1 cell, Regulatory B (Breg) cell
Macrophage subsets	M1 macrophage, M2 macrophage	M1 macrophage, M2 macrophage
DC cell subsets	cDC, pDC, unique C1q+ DC	cDC, pDC
Neutrophil subsets	Subsets classification based on enrichment analysis of DEGs: C-type lectin receptor signaling pathway, Endocytosis, Ribosome, Oxidative phosphorylation, MAPK signaling pathway, Cell cycle	Neutrophil-killers (with high membrane permeability intensively generate reactive oxygen metabolites), Neutrophil-cagers ( produce reactive oxygen species less intensively)
HSPC subsets	HSPCs 1-4, Cycling HSPCs, NK progenitors, Myeloid progenitors, Erythrocyte progenitors, Lymphoid progenitors, Endothelial progenitors, Thrombocyte progenitors	Multipotent progenitors (MPPs), Common myeloid progenitors (CMPs), Common lymphoid progenitors (CLPs), Granulocyte-macrophage (GMPs), Megakaryocyte-erythrocyte progenitors (MEPs)
Cells with trained immunity characteristics	Neutrophil, Macrophage, HSPCs	Neutrophil, Macrophage, NK cell, Monocyte
T/B cell proliferation and activation	+	+
AID expression	+	+
Somatic hypermutation (SHM)	+	+
RAG-mediated rearrangement	+	+
Antibody types	IgM, IgD, IgZ	IgM, IgD, IgG, IgA, IgE
