# Supplementary material for: Single-cell RNA sequencing unveils the hidden powers of zebrafish kidney for generating both hematopoiesis and adaptive antiviral immunity
Source: eLife. 2024 Mar 18;13:RP92424. doi: 10.7554/eLife.92424 (PMC10948150; doi:10.7554/eLife.92424)
Supplement: Supplementary file 9. [file elife-92424-supp9.xlsx]

## Sheet: Sheet1
Supplementary file 9. Primers used in this study for Real-time quantitative PCR and IgM antibody repertoire analysis.
Supplementary file 9-1. Primers used in this study for Real-time quantitative PCR
Gene	Forward (5'-3')	Reverse (5'-3')
isg15	CTGGAGGATGAATCCCGGAC	CTCGAGCTGTCTGCCTTTGA
CR318588.3	TTCCTGGATAGGGATGGGCA	CCCCTGGCAGCAAGGATTTA
ifi45	AGACTCGACCTCAGATGGCA	TGAAGAACAGCAACCGCTGA
zgc:152791	AAACGTCGCTGCAGGTCTAA	TTGAGGAGGCAATCGAACCC
CU984600.2	ACCAAGGACCGGCTCTCTAT	TGCGGGTCAAAAATGGCAAG
lck	AGATGAATGGTGTGACCAGTGTA	GATCCTGTAGTGCTTGATGATGT
cd154	CGAATGGCAACAGGGCACAAGAATG	TCTAAACACTCCTGCTGATGATGCC
il2	CTATGAATGTATAAGCGACC	CTGATTCACTTCAGCCTCCA
ifng1	GACGTATGCAGAAACGCTATGG	ATGCTTTAGCCTGCCGTCTCT
perforin	GACCCTTCAGCCGCTGCAGCAAAC	GTAACTGTAGTATGTACAGCTGATC
cd40	TTCTCAGAGTCTGTTTGCTGGTCAC	TCCCGTCACTACATTCCTCAC
il4	GGATCCTGAATGGGAAAGGGG	GCAGTTTCCAGTCCCGGTAT
aicda	TGGACGGTGCAAGATTGTGT	CGAGATCTGAACTCCTGCCC
rag1	GGCCAGTGAAGGGAATGAATCTG	TGGAGTCTCTTCAGGGTTGAATG
rag2	CTGTCCGCCTCAAGTCTACC	GGATCAAACGAGAGGGTCGG
Supplementary file 9-2. Primers used in this study for IgM antibody repertoire analysis
Name	Sequence	V gene segment	Concentration
ZVH 1-F	TGGTCTCCTCTGCCTTTTGT	5.3	200 nM
ZVH 2-F	AACCATGATCGCCTCATCTC	5.4, 5.8	400 nM
ZVH 3-F	GATGGCAACAACATCCTGTG	7.1	200 nM
ZVH 4-F	TGCATTTCAGTTCTGCTGCT	8.2, 8.3, 8.4	600 nM
ZVH 5-F	ACGAATGCAGGAGTCAGACA	14.1	200 nM
ZVH 6-F	TGTTTCAACTGTTCGTGGTCA	1.1, 1.2	400 nM
ZVH 7-F	TGGAGTTGTGTTGATGATGATT	1.3	200 nM
ZVH 8-F	TTCATATGCACATGGTCAGTCA	1.4	200 nM
ZVH 9-F	TGTGGTGATTGTCTTTCAAGG	2.1, 2.2	400 nM
ZVH 10-F	TGGAAAAGGAGTCAAAAAGCAT	2.3	200 nM
ZVH 11-F	GCTTTTGTCATGTTTGCTCTCA	3.2	200 nM
ZVH 12-F	GCTTACTGCTGCTCTCATTCAG	4.3, 4.8, 4.9	600 nM
ZVH 13-F	TTTCTGCTGCTGTGCTTTAC	4.5, 4.7	400 nM
ZVH 14-F	CTGCTGTTTTCATTGGCCTTA	4.1	200 nM
ZVH 15-F	GGTTTATACTGTCAAGGCATGG	4.2	200 nM
ZVH 16-F	CAGCCTCAAGATGAAGAATGC	4.6	200 nM
ZVH 17-F	CTAGTGCTGTTTCTGGCAGT	5.1, 5.7	400 nM
ZVH 18-F	CATGATCACCTCATCTCTCTGC	5.2, 5.5	400 nM
ZVH 19-F	CATGATTCTGAGCATTTTATCATGT	6.1	200 nM
ZVH 20-F	CAATAATCAACTCACTCCTGCTG	6.2	200 nM
ZVH 21-F	CTGCGTCCAGTGTATATTCCA	8.1	200 nM
ZVH 22-F	TGTATTGACTGTCAGGTTGTGC	9.2, 9.4	400 nM
ZVH 23-F	TCTTTCTGCAGTTGGCAG	9.1, 9.3	400 nM
ZVH 24-F	TCTCAAAGTTGTTGGTGTCAGA	10.1	200 nM
ZVH 25-F	CTCTCTAAACAAGTGCAAAGGTC	11.1	200 nM
ZVH 26-F	TGGACCTTAAACTTAACTGTCTG	11.2	200 nM
ZVH 27-F	CCATATGTTTCTGGCATCTCCC	13.2	200 nM
C-µ-R	TGCACTGAGACAAACCGAAG		7.8 μM
